# Supplementary material for: Integrative Analysis Reveals Comprehensive Altered Metabolic Genes Linking with Tumor Epigenetics Modification in Pan-Cancer
Source: Biomed Res Int. 2019 Nov 7;2019:6706354. doi: 10.1155/2019/6706354 (PMC6881592; doi:10.1155/2019/6706354)
Supplement: Supplementary Materials — Supplementary Table 1: the number of sample information and differential expression genes for 11 different cancer types and 5 GEO data projects. Supplementary Table 2: the differential expression gene list and its fold change in 11 cancer types compared with normal samples. Supplementary Table 3: the metabolic genes and the differential expression of metabolic genes. Supplementary Table 4: the function annotations of MDEGs. Supplementary Table 5: the critical different expression genes related to epigenetic modification in the specific types of cancer. Supplementary Table 6: the genes with different expression and methylation influenced by DNMT3B expression. Supplementary Table 7: gene ontology analysis of differential expression and methylation genes. Supplementary Table 8: the correlation between expression and methylation of specific genes. Supplementary Table 9: the oncogene/tumor suppressor mutation frequency and the sample size with mutation across cancer types. Supplementary Table 10: the differential expression MDEGs in mutated samples compared with non-mutated samples across cancer types. Supplementary Table 11: the pathway enrichment analysis in each mutation group. Supplementary Figure 1: relationships among metabolic pathways, cancer types, and oncogene/suppressor gene mutations. [file 6706354.f1.zip]

Archive with 12 entries (12 files):
- 6706354.f1/Supplementary Figure 1.docx
- 6706354.f1/Supplementary Table1.xlsx
- 6706354.f1/Supplementary Table10.xlsx
- 6706354.f1/Supplementary Table11.xlsx
- 6706354.f1/Supplementary Table2.xlsx
- 6706354.f1/Supplementary Table3.xlsx
- 6706354.f1/Supplementary Table4.xlsx
- 6706354.f1/Supplementary Table5.xlsx
- 6706354.f1/Supplementary Table6.xlsx
- 6706354.f1/Supplementary Table7.xlsx
- 6706354.f1/Supplementary Table8.xlsx
- 6706354.f1/Supplementary Table9.xlsx
