# Supplementary material for: Integrative Analysis Reveals Comprehensive Altered Metabolic Genes Linking with Tumor Epigenetics Modification in Pan-Cancer
Source: Biomed Res Int. 2019 Nov 7;2019:6706354. doi: 10.1155/2019/6706354 (PMC6881592; doi:10.1155/2019/6706354)
Supplement: Supplementary Materials — Supplementary Table 1: the number of sample information and differential expression genes for 11 different cancer types and 5 GEO data projects. Supplementary Table 2: the differential expression gene list and its fold change in 11 cancer types compared with normal samples. Supplementary Table 3: the metabolic genes and the differential expression of metabolic genes. Supplementary Table 4: the function annotations of MDEGs. Supplementary Table 5: the critical different expression genes related to epigenetic modification in the specific types of cancer. Supplementary Table 6: the genes with different expression and methylation influenced by DNMT3B expression. Supplementary Table 7: gene ontology analysis of differential expression and methylation genes. Supplementary Table 8: the correlation between expression and methylation of specific genes. Supplementary Table 9: the oncogene/tumor suppressor mutation frequency and the sample size with mutation across cancer types. Supplementary Table 10: the differential expression MDEGs in mutated samples compared with non-mutated samples across cancer types. Supplementary Table 11: the pathway enrichment analysis in each mutation group. Supplementary Figure 1: relationships among metabolic pathways, cancer types, and oncogene/suppressor gene mutations. [file 6706354.f1.zip › 6706354.f1/Supplementary Table1.xlsx]

## Sheet: Table 1-1
Table 1-1 The sample information of 11 different cancer types
TCGA_Cancer name	TCGA_description	Number of normal samples in TCGA	Number of tumor samples in TCGA
BRCA	Breast Invasive Carcinoma	98	1058
COAD	Colon Adenocarcinoma	41	271
COADREAD	Colon Rectum Adenocarcinoma	51	352
HNSC	Head and Neck Squamous Cell Carcinoma	44	444
KIRC	Kidney Renal Clear Cell Carcinoma	72	527
KIRP	Kidney Renal Papillary Cell Carcinoma	32	259
LIHC	Liver Hepatocellular Carcinoma	50	345
LUAD	Lung Adenocarcinoma	58	505
LUSC	Lung Squamous Cell Carcinoma	51	492
STAD	Stomach Adenocarcinoma	35	390
THCA	Thyroid Carcinoma	57	494

## Sheet: Table 1-2
Table 1-2 The number of Differential expression genes for 11 different cancer types
TCGA_Cancer name	No. of EGs	No. of DEGs	No. of MDEGs	No. of upregulated MDEGs	No. of downregulated MDEGs
BRCA	14549	5638	700	375	325
COAD	13788	5875	839	504	335
COADREAD	13804	5928	827	495	332
HNSC	13957	6832	864	671	193
KIRC	14396	5950	769	287	482
KIRP	14270	5034	674	245	429
LIHC	12974	8337	1103	947	156
LUAD	14719	6182	770	570	200
LUSC	14727	7569	953	643	310
STAD	14786	7701	941	753	188
THCA	13846	3636	369	176	193

## Sheet: Table 1-3
Table 1-1 The sample information of GEO data set
Accession	tissue	Year	Area	Platform	Number of normal samples	Number of tumor samples
GSE32665	lung adenocarcinomas	2013	USA	GPL6254	92	87
GSE76427	hepatocellular carcinoma	2017	Singapore	GPL10558	52	115
GSE37182	colon cancer	2013	Italy	GPL6947	88	84
GSE87630	liver cancer	2017	South Korea	GPL6947	30	64
GSE13507	Bladder Cancer	2010	South Korea	GPL6102	58	198
