# Supplementary material for: Integrative Analysis Reveals Comprehensive Altered Metabolic Genes Linking with Tumor Epigenetics Modification in Pan-Cancer
Source: Biomed Res Int. 2019 Nov 7;2019:6706354. doi: 10.1155/2019/6706354 (PMC6881592; doi:10.1155/2019/6706354)
Supplement: Supplementary Materials — Supplementary Table 1: the number of sample information and differential expression genes for 11 different cancer types and 5 GEO data projects. Supplementary Table 2: the differential expression gene list and its fold change in 11 cancer types compared with normal samples. Supplementary Table 3: the metabolic genes and the differential expression of metabolic genes. Supplementary Table 4: the function annotations of MDEGs. Supplementary Table 5: the critical different expression genes related to epigenetic modification in the specific types of cancer. Supplementary Table 6: the genes with different expression and methylation influenced by DNMT3B expression. Supplementary Table 7: gene ontology analysis of differential expression and methylation genes. Supplementary Table 8: the correlation between expression and methylation of specific genes. Supplementary Table 9: the oncogene/tumor suppressor mutation frequency and the sample size with mutation across cancer types. Supplementary Table 10: the differential expression MDEGs in mutated samples compared with non-mutated samples across cancer types. Supplementary Table 11: the pathway enrichment analysis in each mutation group. Supplementary Figure 1: relationships among metabolic pathways, cancer types, and oncogene/suppressor gene mutations. [file 6706354.f1.zip › 6706354.f1/Supplementary Table2.xlsx]

## Sheet: Table 2-1
Table 2-1 The differential expression gene list and its fold change in 11 cancer types compared with normal samples.
GENE Symbols	GENE ID	BRCA	COADREAD	COAD	HNSC	KIRC	KIRP	LIHC	LUAD	LUSC	STAD	THCA
A1BG	1	2.49041	-1.8214	-1.79282	2.17523	2.0462	1.6768	-1.70466	1.6123	1.36583	1.03015	1.74529
A1CF	29974	-3.17516	-2.00635	-2.10151	-1.08117	-1.17572	-6.89211	-1.05477	115.929	16.3668	-1.22298	-1.18264
A2LD1	87769	1.07136	1.20007	1.19438	1.21204	-5.29432	-12.6422	1.37231	1.5465	1.31722	1.66309	-1.02433
A2ML1	144568	14.1718	167.92	142.375	-3.54917	1.25419	4.96134	1.99314	65.9377	239.362	-21.2268	-1.08654
A2M	2	-2.23087	-1.96924	-2.00145	-1.44724	1.11809	-2.65897	-1.36104	-3.33228	-10.1974	1.44246	1.30222
A4GALT	53947	-1.19512	-1.24326	-1.16013	1.24954	1.50569	1.39152	3.32913	1.09495	2.79471	-1.23123	1.22393
A4GNT	51146	-2.88946	2.88453	3.90644	7.41966	2.59355	2.46831	7.52654	2.49013	-2.23477	-1.5879	-2.44797
AAAS	8086	1.13795	1.47328	1.47597	1.56984	1.09412	1.30889	2.02571	1.41338	1.62444	1.6328	-1.08515
AACS	65985	-1.52965	1.06484	1.10569	1.07946	-1.85393	-1.14351	3.45849	1.68789	1.90965	1.36588	-1.20266
AADACL2	344752	-6.71568	-76.8014	-81.8609	-2.62501	-4.79617	-7.55604	6.0321	-3.19851	11.8436	-2.08804	-4.57467
AADACL3	126767	-10.7415	1.67051	1.19076	-27.7314	1.37828	inf	30.4189	12.4115	56.7657	22.9263	inf
AADACL4	343066	-6.85709	-5.00205	-4.51164	-63.689	-11.2807	-4.19155	3.21239	1.07444	1.19183	1.38924	-1.60855
AADAC	13	-24.7979	-5.09885	-5.55408	-3.98183	17.0823	8.0192	-1.13641	-2.8141	1.09994	-3.03119	-5.58318
AADAT	51166	-1.02776	2.26252	2.45523	1.43915	-1.66887	-1.51722	-4.68834	1.00101	-1.08475	1.20325	-1.21876
AAGAB	79719	1.69637	-1.01156	1.02026	1.71852	-2.02872	-1.04792	2.14556	1.49449	1.80212	2.01301	-1.22094
AAK1	22848	-1.2297	-1.21034	-1.27751	1.80791	-1.78334	-1.12111	2.58898	-1.077	1.24233	1.29126	-2.1276
AAMP	14	1.20313	1.14371	1.10451	1.29743	-1.19593	-1.28003	1.44957	1.38276	1.56787	1.37695	-1.13978
AANAT	15	1.7003	1.34892	1.23202	2.2909	2.01917	1.67586	2.77826	2.00035	1.68316	1.76195	-1.87129
AARS2	57505	1.1376	1.33617	1.32171	1.19534	1.04567	1.19942	2.83899	1.59509	1.77681	2.03799	-1.16221
AARSD1	80755	1.04927	1.38939	1.43758	1.06653	1.10883	1.55752	2.10413	1.7613	1.5624	1.06153	1.0657
AARS	16	1.18872	1.9028	1.87826	1.9692	-1.29305	-1.08342	1.71807	1.57458	1.68698	1.74374	-1.2044
AASDHPPT	60496	1.05217	1.73024	1.76411	1.29363	-1.16873	-1.14185	1.25399	1.37295	1.48449	1.91561	-1.09152
AASDH	132949	-1.32483	1.13298	1.14357	1.27316	-1.66145	-1.66265	1.23863	1.07949	1.24673	1.53646	-1.58995
AASS	10157	-3.5267	1.16095	1.16053	-1.16418	-1.92645	-1.45789	-1.2197	-1.17572	-1.20464	-1.38055	-1.99789
AATF	26574	1.42672	1.83698	1.85284	2.19759	1.227	1.3034	2.48139	1.54588	1.55433	2.55199	1.02009
AATK	9625	1.73476	1.04951	1.08867	1.65332	2.65675	-2.99401	4.40713	-3.30105	-7.4357	1.44795	1.20616
ABAT	18	2.28072	-1.11215	-1.21991	-1.02115	-8.6748	-3.66803	-2.02354	1.21018	-1.24655	-1.66715	-1.40582
ABCA10	10349	-13.3425	-2.94674	-2.60131	1.03648	1.06651	1.04437	1.30119	-3.08859	-2.53539	-1.54633	-4.30543
ABCA11P	79963	-1.22265	1.45261	1.49013	1.6079	-1.88472	-1.63509	2.65931	1.21166	1.11124	1.7541	-1.24836
ABCA12	26154	2.11408	20.0365	31.4244	1.91929	6.56609	16.797	23.7968	86.7163	140.535	3.29889	24.0551
ABCA13	154664	1.3512	2.47181	2.02773	1.16481	-18.7397	1.84307	1.96481	1.5182	5.83841	5.67065	-1.17513
ABCA17P	650655	2.46437	7.89082	9.43327	10.089	4.84352	3.07201	9.69657	6.27793	6.69459	5.85994	-1.35927
ABCA1	19	-2.63748	-1.70077	-1.69024	2.28322	2.71472	1.78767	-1.21749	-1.80439	-1.22435	1.90223	1.49283
ABCA2	20	-1.00044	1.35194	1.34348	1.21433	-1.11585	-1.42871	2.06257	1.30246	1.06036	1.95515	1.12097
ABCA3	21	1.85161	1.04421	1.20715	1.31702	1.35834	2.21522	5.0053	-4.04068	-11.7497	1.11605	-1.16289
ABCA4	24	1.32868	2.67828	3.24101	2.86232	-37.7945	-42.2502	4.37201	21.5305	14.6312	-2.46535	2.08912
ABCA5	23461	-3.16532	-2.18404	-2.25187	-1.43825	-1.1695	-1.46368	1.60278	-1.15974	1.52931	1.0919	-1.2755
ABCA6	23460	-7.26961	-6.31124	-5.4682	-1.81908	-1.85653	1.15247	-1.2985	-2.81349	-5.37378	-1.6163	-4.12193
ABCA7	10347	1.25222	1.30901	1.28624	-1.21251	1.06613	1.62207	3.47848	1.61871	-1.05273	2.32208	1.17322
ABCA8	10351	-15.7682	-22.516	-21.4356	-6.11366	-4.85786	-1.45831	-1.94619	-7.86665	-20.0387	-2.74787	-2.39171
ABCA9	10350	-13.9052	-8.54303	-7.14735	-2.73435	-2.28308	-1.7969	-1.29659	-3.94587	-6.47641	-2.74971	-9.80912
ABCB10	23456	1.25881	1.10276	1.08858	1.25521	-1.01417	-1.20612	1.91419	1.15635	1.2073	1.72942	-1.54038
ABCB11	8647	-4.57884	-36.962	-40.6423	-2.2158	10.4797	16.9039	-1.24723	2.80246	2.34541	6.05805	-5.56244
ABCB1	5243	-4.70186	-2.74778	-2.88129	-1.49423	-3.48983	1.28852	1.31314	-3.07676	-5.78878	-1.14019	-1.0957
ABCB4	5244	1.27342	-1.39083	-1.40654	-1.78175	3.69744	2.99305	-1.13464	5.90816	-1.01112	2.87503	-1.39262
ABCB5	340273	-13.021	-9.88972	-9.4957	-1.04479	28.4336	142.948	278.371	-1.98901	-1.08425	-2.37555	1.0507
ABCB6	10058	1.0204	1.92559	1.85714	1.63718	2.5277	1.70089	1.95298	3.95113	5.38533	1.68829	-1.57653
ABCB7	22	-1.24762	1.21657	1.21742	1.06824	1.01457	-1.33824	1.29708	1.18553	1.08436	1.40223	-1.00916
ABCB8	11194	1.87598	1.26288	1.26146	1.37093	-1.36017	1.11006	1.93991	1.35923	1.14806	1.46315	-1.24029
ABCB9	23457	1.89932	1.0973	1.06288	2.17056	-1.13961	1.11597	3.47501	2.75816	2.48792	1.64998	1.6896
ABCC10	89845	1.19024	1.78117	1.67889	1.8623	-1.01628	1.37846	4.60774	1.70962	1.73181	2.30869	1.11152
ABCC11	85320	1.00539	1.23892	1.10052	1.43824	-1.2118	-2.8209	1.45277	10.9348	5.43299	3.23714	46.7207
ABCC12	94160	2.66147	18.7015	18.5041	-1.92462	18.2508	8.51274	6.72317	2.24144	2.59398	2.0562	16.1967
ABCC13	150000	84.6866	-10.4121	-10.635	1.71801	1.20944	-2.18873	2.31357	-4.24269	-3.29987	-3.92858	1.2403
ABCC1	4363	1.20231	2.32163	2.33437	2.59701	1.46602	1.35019	3.78664	1.25475	4.08007	1.65024	-1.41416
ABCC2	1244	-1.7514	5.60962	4.7006	4.05495	1.34052	-1.57412	1.29411	54.7551	32.4417	-1.10999	-1.95844
ABCC3	8714	1.09768	-1.70643	-1.77151	1.94547	4.55255	4.67722	1.55213	6.15543	1.25754	2.14246	5.67174
ABCC4	10257	1.39482	1.03669	1.02031	2.21189	-1.1264	1.74578	5.52873	-1.00856	-1.3436	2.55829	-2.31254
ABCC5	10057	2.07611	1.15236	1.15244	3.26742	-1.40738	-1.00743	3.70237	1.76062	12.6212	1.0072	-1.18983
ABCC6P1	653190	-3.03047	-1.32699	-1.51205	-2.69444	1.44886	1.2764	1.28619	1.24018	-5.31266	1.09629	6.79091
ABCC6P2	730013	-1.17579	-1.60991	-1.68949	-1.86091	-1.3109	1.36128	2.72719	1.15849	-4.37653	1.22613	2.69373
ABCC6	368	-3.18502	-1.71539	-1.96751	-4.07368	-1.34359	-1.79671	-1.05766	-1.47351	-8.87813	-1.06966	1.64315
ABCC8	6833	1.66921	-4.90121	-4.26747	-2.15573	-1.50383	1.38676	21.1009	1.39047	-1.06225	-1.54302	-1.29954
ABCC9	10060	-5.33954	-1.98907	-1.81332	-1.82657	-1.075	-2.06975	-1.85142	-2.07192	-3.61283	-1.87598	-1.71178
ABCD1	215	1.37323	-1.04295	-1.05589	2.60738	1.89643	1.49506	3.16794	1.34451	1.09196	1.69982	-1.00485
ABCD2	225	-19.2322	-3.58024	-3.37263	-1.96751	1.54347	-3.41426	1.78165	-1.15431	-1.88229	-1.33612	-2.12992
ABCD3	5825	1.42472	-1.95557	-1.97586	-1.575	-2.17437	-1.70141	-1.12688	-1.00938	-1.49399	1.30982	1.01948
ABCD4	5826	-1.52391	-1.44555	-1.4587	1.31159	-1.003	-1.02085	1.10629	-1.03849	-1.30281	1.12634	1.05656
ABCE1	6059	1.1052	2.25997	2.32851	1.54891	-1.03575	-1.13234	1.26368	1.54707	1.7307	2.91416	-1.12459
ABCF1	23	1.27967	1.27953	1.25771	1.59893	-1.44524	-1.29495	2.01562	1.44819	1.4682	1.98694	-1.20427
ABCF2	10061	1.22479	1.55957	1.56446	1.51046	-1.2398	1.13229	2.64533	1.61815	1.80682	2.03581	1.10927
ABCF3	55324	1.34295	1.1653	1.12665	1.85961	-1.30018	-1.0155	1.68066	1.31139	2.56145	1.70151	-1.08792
ABCG1	9619	1.8268	-1.56745	-1.64439	2.2967	2.24448	1.47175	2.34946	-2.39759	-1.83628	1.32192	1.42252
ABCG2	9429	-3.05848	-29.8379	-33.8224	1.17548	1.85948	-3.18001	-1.07079	-4.22352	-3.453	-4.49866	1.68977
ABCG4	64137	1.08423	-1.54252	-1.51442	-1.13869	-1.51581	-1.51657	1.7258	1.36268	2.14656	-2.3854	2.86557
ABCG5	64240	-1.09584	-3.82252	-4.25623	3.4542	-1.3931	1.70025	-1.05102	1.47883	2.36525	-6.03111	-2.55923
ABCG8	64241	-4.46013	-3.87656	-4.11561	6.0629	-2.73621	1.09776	-1.0487	10.8244	29.0832	-7.33502	-1.32912
ABHD10	55347	1.02574	1.29404	1.35577	1.44235	-1.80135	-1.25119	1.19199	1.16572	1.64259	1.76478	-1.1524
ABHD11	83451	2.40782	1.43196	1.3986	1.00996	-1.14867	3.68134	2.39639	2.89353	2.02136	3.4806	1.16414
ABHD12B	145447	4.57897	2.48228	2.4167	-2.05797	-1.17301	-2.18315	5.95981	-2.07925	1.75415	9.93972	1.214
ABHD12	26090	2.03942	1.3788	1.30421	1.29199	-1.07787	1.10555	2.62805	1.49757	1.19144	1.60244	-1.08747
ABHD13	84945	-1.27094	1.27478	1.29685	1.20449	-1.35541	-1.32042	1.04742	-1.33505	-1.38284	1.72879	-1.26999
ABHD14A	25864	-1.10103	-1.02498	1.05323	-1.19002	-2.43348	-1.26072	1.76321	1.07298	-2.00674	-1.01459	1.13869
ABHD14B	84836	-1.74868	-1.06285	-1.07738	-1.4524	-1.94332	-1.05372	-1.12216	-1.08041	-1.82391	1.06651	1.06455
ABHD15	116236	-1.78758	-1.27736	-1.31737	1.85527	-1.02759	1.1756	-1.25658	1.15731	1.09415	1.75282	-1.13841
ABHD1	84696	-1.61256	2.90109	2.93552	-3.00123	1.58855	1.90952	1.58415	2.3134	3.5694	2.00718	-1.53488
ABHD2	11057	1.92033	2.15193	2.01492	1.10337	-1.36117	-1.21769	-1.25122	-1.31268	-1.53812	2.36421	-1.30264
ABHD3	171586	1.78582	-3.42844	-3.44977	1.9727	-1.48937	-1.23404	2.04372	1.60266	2.21144	1.57728	1.23269
ABHD4	63874	-1.12917	-1.34781	-1.36984	1.39827	-1.77696	-1.3177	2.83762	1.4434	1.71795	-1.03269	1.01128
ABHD5	51099	-1.75852	-2.04942	-2.18272	-1.69012	-2.07712	1.04687	1.03711	-1.75503	-1.75041	-1.13338	-1.28367
ABHD6	57406	-2.37381	-1.84333	-1.90194	1.01848	-1.02835	-1.00983	-1.36132	-2.33209	-1.84581	-1.72213	-1.29246
ABHD8	79575	1.45217	-1.83397	-1.8004	1.64275	-1.27596	1.11547	1.71877	-1.13944	1.03434	-1.44071	1.15898
ABI1	10006	1.02171	-1.01893	-1.03317	1.13916	-1.14492	-1.10186	1.93793	1.0527	1.42996	1.37647	-1.07056
ABI2	10152	-1.26999	1.31315	1.42292	1.4665	-1.51346	-1.36766	2.03902	-1.42517	-1.44239	1.11141	-1.08946
ABI3BP	25890	-4.45719	-8.1826	-7.15563	-3.40503	1.45023	3.42955	-1.10165	-5.43254	-9.94609	-4.80664	-3.89162
ABI3	51225	1.12942	-1.76048	-1.82064	1.7252	1.93707	-1.402	1.31812	-1.56103	-2.27594	1.41925	1.39004
ABL1	25	-1.27279	-1.35518	-1.36663	1.40935	-1.02657	-1.04241	2.28249	1.08567	-1.15357	-1.18307	-1.23668
ABL2	27	1.20916	1.5291	1.55506	2.88254	1.57739	1.08597	2.57303	1.22196	-1.04591	2.25158	1.0665
ABLIM1	3983	-2.84481	1.08498	1.1097	-1.77909	-2.13824	-1.50181	1.77777	-1.79476	-1.58066	-1.21375	-1.76842
ABLIM2	84448	-1.30503	2.3161	2.18523	-2.25683	-1.32948	-1.1495	5.16515	1.21409	1.15435	1.57807	-1.34423
ABLIM3	22885	-2.83793	-1.33917	-1.24532	-1.93536	3.76175	1.07365	-1.38577	-2.60255	-4.98664	-1.43703	-1.57719
ABO	28	-1.51014	-2.01609	-2.17769	-2.6084	-1.9121	-2.88502	3.07136	1.19876	-1.09995	1.42495	-1.49565
ABP1	26	12.2986	-3.50325	-3.74458	1.02267	-1.05485	-2.4577	-2.60311	36.0878	3.76577	-1.24552	9.10572
ABRA	137735	-114.681	-1.51004	-1.52911	-23.7366	-1.13263	1.253	7.10297	-1.93391	-2.57563	1.63319	1.11465
ABR	29	-1.22098	-1.23598	-1.25889	-1.24525	1.27568	2.20268	2.00049	-1.18093	-1.78494	1.19985	2.6074
ABT1	29777	1.18462	1.33623	1.35525	1.49532	1.22414	1.10369	1.91535	1.34872	1.56831	1.52366	-1.00301
ABTB1	80325	-1.51802	1.10259	1.09171	1.82406	1.16702	-1.15916	1.53075	-1.66187	-1.93684	1.21619	1.21933
ABTB2	25841	1.39392	-1.14632	-1.10826	1.19848	-3.41219	-2.0696	1.30211	2.2624	2.07543	1.32363	5.86881
ACAA1	30	-1.07099	-1.88186	-1.97479	-1.40549	-3.31048	-2.03173	-1.92958	-1.2085	-1.74171	-1.34618	1.23138
ACAA2	10449	-2.38524	-3.06926	-3.26079	-1.9108	-1.35101	-1.60158	-1.96781	-1.51512	-2.37837	1.53952	1.12755
ACACA	31	-1.21963	1.79301	1.89591	1.47495	-1.76739	1.1255	2.94988	-1.04494	1.02594	1.8351	1.00468
ACACB	32	-13.1473	-3.34302	-3.33315	-4.05897	-2.06013	-2.56659	-1.53089	-2.56523	-4.12457	-2.56693	-2.87971
ACAD10	80724	-1.0323	-1.2024	-1.25846	1.14773	-1.812	1.07965	1.16639	1.41918	1.15816	1.25055	-1.23534
ACAD11	84129	-2.28362	1.3946	1.38143	1.66036	2.44996	-1.76876	-1.92009	-1.09951	1.30807	-1.35415	-1.04813
ACAD8	27034	-1.37787	-1.34087	-1.3398	-1.66707	-2.38926	-1.77696	1.15332	2.52341	-1.0923	1.28359	-1.03508
ACAD9	28976	-1.03273	1.27428	1.28719	1.46672	-1.10867	1.0815	1.55117	1.18107	1.76978	1.36534	1.04958
ACADL	33	-12.528	-2.33391	-1.82692	-3.41657	1.41452	-1.17874	-1.87067	-8.93988	-10.0018	-2.384	-1.5129
ACADM	34	-1.65021	-2.11156	-2.1125	-2.10676	-3.03437	-2.78737	-1.5711	-1.00848	-1.2435	-1.36091	-1.61045
ACADSB	36	-1.02593	-1.59135	-1.52927	-2.39969	-4.19744	-4.51981	-2.18082	-1.25552	-1.64538	-1.39799	-1.70539
ACADS	35	-2.67386	-4.76817	-4.85733	-1.59785	-1.00403	-1.1032	-2.23593	-1.13345	-1.5363	-1.59071	-1.27617
ACADVL	37	-1.71464	-1.61407	-1.61247	-1.49351	1.0816	1.24153	-1.0092	1.20981	-1.05108	-1.11439	1.17026
ACAN	176	20.9046	11.4179	10.0627	4.31365	5.75977	1.15991	29.7242	2.9899	1.67898	19.6547	5.55825
ACAP1	9744	1.7932	-1.69532	-1.69983	2.08702	6.2619	1.96361	1.46849	1.53101	-1.18699	1.12358	-1.93254
ACAP2	23527	-1.19328	-1.30599	-1.31122	1.57051	1.07448	-1.16268	1.52665	-1.18355	2.17969	1.53352	-1.02023
ACAP3	116983	1.52508	1.4768	1.50658	1.34686	1.6632	1.7425	2.3804	2.02679	1.81279	1.08379	1.20178
ACAT1	38	-1.86088	-2.29814	-2.29722	-1.99103	-2.58045	-2.01728	-1.75642	-1.33281	-1.82711	-1.30585	-1.41705
ACAT2	39	1.5116	-1.02383	1.00583	1.05994	-1.6465	-1.69499	-1.09685	-1.19656	1.65044	1.35904	-1.2069
ACBD3	64746	1.60387	1.17568	1.18999	1.15775	-1.02093	-1.08106	2.0234	1.42624	1.2979	1.90879	-1.22769
ACBD4	79777	-1.33985	-1.45522	-1.49294	-1.17189	1.28616	1.10074	-1.20714	1.06375	-1.83786	-1.50493	-1.0187
ACBD5	91452	1.11281	1.11711	1.12483	1.11317	-1.90582	-1.49833	1.01676	1.10541	-1.2414	2.02636	-1.27632
ACBD6	84320	1.64987	1.88583	1.94016	1.81263	1.22735	1.13146	3.43001	1.64854	1.78608	1.66699	1.06096
ACBD7	414149	1.5561	4.69261	4.58314	1.05031	-2.95866	-1.22918	5.90536	1.93604	1.96903	8.58569	5.01451
ACCSL	390110	-1.18185	1.01118	-1.51789	-4.32639	2.79953	-2.09838	18.0791	-1.1527	-1.24233	5.89793	-7.11648
ACCS	84680	-2.019	1.3262	1.33203	1.04926	2.16724	1.34281	1.62025	1.24381	-1.456	1.37323	-1.06642
ACD	65057	1.03453	2.09037	2.0957	2.3773	1.56307	1.67099	2.4317	1.2021	1.47904	1.55023	-1.1474
ACE2	59272	2.04246	-1.07891	-1.27429	1.30684	1.21652	1.76813	2.27923	3.73623	1.82513	-7.61806	-1.30333
ACER1	125981	-1.20663	-1.27007	-1.26041	-5.17487	-1.08555	-4.01038	-1.08055	1.265	3.92725	-38.0472	-1.51067
ACER2	340485	-1.7373	-1.25781	-1.18163	1.36688	-1.37329	-1.03094	-1.03318	1.20766	1.04037	-1.86946	2.21009
ACER3	55331	-1.35973	-1.65608	-1.69384	1.36919	-1.05051	-1.15063	1.71273	-1.56068	-1.26418	1.86845	-1.19262
ACE	1636	-1.20796	-2.42779	-2.70332	1.27704	2.08571	-1.66148	3.37142	-3.16649	-6.05794	-2.95259	-1.159
ACHE	43	-1.46055	-1.82137	-1.7639	-3.72223	2.19028	5.63009	2.83338	6.07498	-1.11743	2.09473	-1.94286
ACIN1	22985	1.01298	1.18998	1.18389	1.44557	1.03402	1.08452	1.98103	1.31837	1.24565	1.54964	1.0122
ACLY	47	1.1854	1.74879	1.77888	2.08154	2.4294	1.23071	3.42266	1.47448	1.40472	2.52537	-1.01253
ACMSD	130013	6.29567	44.1544	44.5522	6.72639	-1.25543	-1.32407	-1.29003	58.4269	1.23139	-1.81302	3.20318
ACN9	57001	-1.07197	1.32253	1.37551	1.41658	-1.97732	1.06832	1.49994	2.09504	2.65294	1.95189	-1.30312
ACO1	48	-4.25646	-1.13478	-1.13573	-1.03716	-2.31946	-2.57132	-1.05947	1.13789	-1.53635	-1.07005	1.51673
ACO2	50	-1.15756	-1.99123	-2.00956	-1.3779	-1.50315	-1.54865	1.7378	-1.00808	1.31821	-1.35265	-1.06943
ACOT11	26027	1.67177	-1.90882	-1.97814	1.06863	-4.85493	-2.28901	2.79712	3.15123	3.19958	-1.48945	-1.75091
ACOT12	134526	-1.47957	-3.40698	-8.41251	2.35745	-29.8079	-12.6956	-1.63375	20.1081	7.2231	-7.67606	35.6848
ACOT13	55856	1.10568	-1.26572	-1.26032	1.4981	-1.55927	-1.49939	1.17517	1.33409	1.18517	1.47432	-1.00831
ACOT1	641371	-1.69584	-1.65218	-1.6307	-1.57724	-2.06068	-2.22876	-1.35622	-1.61815	-2.78612	1.34	1.05589
ACOT2	10965	-1.65445	-1.74935	-1.72442	-1.01644	-2.22238	-2.09688	-1.42195	-1.37855	-1.98397	-1.0931	-1.01391
ACOT4	122970	1.80361	-1.8718	-1.88964	1.29674	-1.22056	-3.21386	1.13153	1.08022	-1.82884	1.4199	1.30863
ACOT6	641372	-1.40454	-1.33216	-1.29466	-4.16823	-2.44015	-3.77859	1.06711	1.19933	-1.9897	1.32038	-2.35838
ACOT7	11332	2.46971	1.14602	1.14828	3.10634	1.10939	-2.29483	1.79997	1.24206	2.02498	1.73223	2.03122
ACOT8	10005	1.56748	-1.08976	-1.1874	1.28841	-1.38754	-1.17098	1.92669	1.2387	1.16924	-1.01622	1.09715
ACOT9	23597	-1.19094	1.74278	1.76529	2.38825	-1.05588	1.20027	2.06288	-1.01967	-1.19468	1.69618	1.20405
ACOX1	51	-1.56406	-2.73268	-3.0329	-1.3766	-2.1126	-1.58633	-1.28387	1.09173	-1.12054	-1.09202	1.20668
ACOX2	8309	1.34835	-1.03254	-1.03896	-5.00979	-4.04777	-4.04595	-1.54113	1.0515	-5.51416	-2.59882	-1.02047
ACOX3	8310	1.10904	-1.26272	-1.29412	-1.48998	-1.19249	-1.2005	1.10782	1.08002	-1.1536	-1.32475	1.13956
ACOXL	55289	3.56064	-1.00083	1.09343	3.4168	-1.40022	2.18951	3.7336	-4.11289	-16.8083	2.23147	-1.06375
ACP1	52	1.42287	1.7041	1.70038	1.60233	-1.07153	-1.05062	1.66735	1.47702	1.72617	1.91258	-1.07628
ACP2	53	1.38573	-1.48346	-1.53557	1.63862	-1.13437	1.06269	1.2093	1.26146	1.00893	1.44786	1.18125
ACP5	54	1.80483	-1.32113	-1.35052	3.06804	1.42947	1.91385	1.66759	-3.16202	-3.77758	2.3126	1.85209
ACP6	51205	1.14715	1.82554	1.86413	-1.38411	-1.59101	-1.18531	2.31228	2.42297	1.56547	1.98264	1.44506
ACPL2	92370	1.15113	1.89859	1.87048	2.63504	1.05086	1.40589	2.77512	1.40328	2.97701	2.82422	1.63294
ACPP	55	1.14125	1.33451	1.42007	-3.00867	-61.1881	-62.3532	5.12003	1.00061	1.6154	-2.12572	1.74547
ACPT	93650	1.12036	2.19684	1.72932	16.7241	3.23329	1.85374	90.5527	1.79507	9.81872	1.94142	-1.68734
ACRBP	84519	1.40863	-1.10673	-1.11382	1.55298	2.40913	4.38398	2.36723	-1.14559	-1.59803	2.02439	-1.48275
ACRC	93953	-1.57156	1.84609	1.79403	1.60438	2.64807	1.07767	3.00563	1.88711	1.11334	2.04035	1.24177
ACRV1	56	2.62753	2.43546	2.5991	3.06114	2.87192	2.40072	3.95986	13.9752	8.36191	3.86542	-1.27791
ACR	49	-1.70704	1.20758	1.21088	-1.33357	2.27241	-1.34881	1.51339	-3.26354	-2.67722	1.26911	1.76854
ACSBG1	23205	-1.67867	-3.49307	-2.95858	-16.5499	-1.32525	1.10322	7.33627	-3.85518	-2.67766	-2.38072	-1.1231
ACSBG2	81616	-2.75354	2.89171	2.57814	1.86323	-6.94534	-10.6676	8.57216	-1.1667	-1.62368	1.73224	-1.14241
ACSF2	80221	-1.13659	-2.63937	-2.93621	-1.23108	-11.7626	-6.55199	1.36632	-1.00963	-1.97419	-1.40251	-1.76497
ACSF3	197322	-1.06997	-1.11274	-1.15785	1.32724	-1.38986	1.10673	1.01767	1.10853	1.07521	1.12862	1.0597
ACSL1	2180	-7.27668	1.22903	1.32124	-1.81613	-1.88033	-2.44389	-2.34106	-1.76511	-2.3124	1.04824	-1.46028
ACSL3	2181	-1.03487	1.26174	1.29415	1.05835	-2.15041	-1.87815	1.70343	1.24663	1.21504	1.52301	-1.04538
ACSL4	2182	-2.40191	2.07282	2.20193	1.54536	-3.10364	-2.12358	6.117	-1.89083	-2.69028	2.03251	1.05572
ACSL5	51703	-1.93495	-1.06468	-1.15596	1.25553	1.30951	-1.46359	1.02485	1.77134	-3.81072	-1.49933	1.8096
ACSL6	23305	3.19923	33.311	32.6265	-1.06024	-5.63058	-8.97064	4.82716	2.65281	1.975	-1.56261	-2.15101
ACSM1	116285	-3.54672	-2.27795	-1.92907	-3.01454	1.22847	6.42776	3.70991	-1.45429	-3.79828	-1.06982	1.83475
ACSM2A	123876	-4.75795	-2.70571	-2.60887	-1.02838	-1.60389	-1.22967	-1.66164	-4.56418	-8.32748	2.68844	-7.04498
ACSM2B	348158	-6.25241	-2.66068	-2.48096	-1.16176	-1.7138	-2.93139	-1.22326	-1.07838	-3.98388	10.6972	-7.0014
ACSM3	6296	-4.31328	-1.48804	-1.41877	-4.5933	-3.06114	-2.17546	-2.74105	1.23028	-3.63379	2.8251	1.02975
ACSM4	341392	1.03433	-1.86122	-2.47773	1.24458	8.83706	2.14174	1.83892	11.6952	14.5124	-1.30988	-1.70968
ACSM5	54988	-15.9107	-5.87258	-5.26481	-3.78451	1.85345	1.08068	-2.47325	-2.04438	-5.38241	-1.72676	-2.19689
ACSS1	84532	1.36154	1.6564	1.51354	1.47451	-1.92686	-2.0339	3.21472	-1.18673	1.1244	1.58997	-1.52065
ACSS2	55902	-3.4747	-1.92003	-2.0222	-1.39583	-1.82984	1.37457	1.29904	-1.46767	-1.96105	-1.03457	-1.08433
ACSS3	79611	-2.57178	1.01018	-1.14258	-3.30462	-1.64835	-1.46454	1.27927	-2.95661	-4.5415	1.5201	-1.20696
ACTA1	58	-86.5264	-1.3493	-1.41893	-14.4772	-1.72779	-1.40529	7.10362	1.0535	1.0647	-1.01996	1.05989
ACTA2	59	-3.14473	-2.21311	-2.16388	-1.17119	1.79566	-2.37165	2.53107	-1.16625	-1.76484	-2.73662	1.55208
ACTBL2	345651	-1.4272	163.829	299.061	-1.17114	-1.94325	1.39081	7.30061	3.75314	1.82172	41.5412	25.4403
ACTB	60	1.29824	-1.1741	-1.15088	1.49648	1.1485	1.25088	1.53187	1.00394	-1.1692	1.01309	-1.28979
ACTC1	70	-5.36689	-1.47861	-1.39859	-1.02169	-1.02234	-3.07431	7.99697	-1.29934	-1.54663	-2.93426	1.17004
ACTG1	71	1.51043	1.04364	1.08271	1.15304	-1.22067	1.11958	1.39674	1.34013	1.33338	1.55845	1.13208
ACTG2	72	-3.97302	-12.8294	-12.3882	-2.64823	1.75035	-4.95708	6.6859	-2.15807	-3.19785	-3.84461	-1.03088
ACTL6A	86	1.82908	1.87578	1.89665	3.05039	-1.20179	1.04507	2.60886	2.11739	5.53106	2.89192	1.02772
ACTL6B	51412	178.562	-3.21984	-2.63347	24.006	87.633	3.06782	47.4437	18.1762	107.324	-1.14115	-6.44912
ACTL7A	10881	-2.07191	-1.10773	-1.23069	2.60957	1.92092	-4.24353	inf	-1.151	-1.35595	2.16748	-1.52475
ACTL7B	10880	1.21802	1.37483	1.52645	3.55887	2.57222	2.26786	3.97461	-1.24446	-1.21562	1.06097	-1.87302
ACTL8	81569	279.799	7.05926	9.27889	49.8067	5.15687	18.0404	429.774	693.974	568.97	378.162	2.04398
ACTL9	284382	inf	inf	inf	7.94048	inf	5.01045	inf	13.2684	1.65162	3.49856	-1.03181
ACTN1	87	-1.33144	-1.11545	-1.04012	2.56514	1.49394	1.1193	1.66886	1.22803	1.45648	-1.3851	1.89161
ACTN2	88	-49.6668	-1.49105	-1.66014	-8.16599	2.70273	1.71606	51.013	-7.22483	-9.18988	-6.39019	1.18133
ACTN3	89	-70.9991	-1.19347	-1.06864	-16.2054	1.24862	-1.00539	3.68628	8.22175	1.38794	2.40897	-2.57909
ACTN4	81	-1.00302	1.03521	1.00531	1.15941	-1.29351	-1.51821	2.12775	-1.1718	1.09335	1.45666	1.44273
ACTR10	55860	-1.09327	-1.2186	-1.19264	1.22771	-1.40971	-1.28194	1.65525	1.04982	-1.05722	1.1213	-1.02576
ACTR1A	10121	1.04439	-1.26002	-1.23608	1.27631	-1.20211	1.16349	1.77104	-1.15299	-1.38377	-1.01108	1.14093
ACTR1B	10120	-1.15377	-1.01687	-1.02608	1.01716	-1.0242	-1.06095	1.67583	1.02878	1.08677	1.04755	1.10638
ACTR2	10097	1.34252	-1.0193	-1.03418	1.53391	-1.0116	-1.09733	1.54639	1.09306	1.22383	1.95599	-1.07386
ACTR3B	57180	1.27035	2.69302	2.62393	1.12375	-1.66376	1.01663	1.86642	1.94613	2.31626	2.61739	1.04794
ACTR3C	653857	1.10677	1.15561	1.09519	-1.16347	-1.63567	-1.26014	-1.11689	1.23802	1.16532	1.90294	-1.22391
ACTR3	10096	1.44776	1.09214	1.09712	1.37329	1.1034	1.16452	1.72997	1.34525	1.77559	1.55382	-1.07546
ACTR5	79913	1.28076	2.23766	2.13068	1.82112	1.23608	1.28039	2.5358	1.7905	1.57048	2.58817	-1.32916
ACTR6	64431	1.07596	1.107	1.15206	1.47599	-1.22826	-1.09355	1.79465	1.17707	1.53698	1.49607	-1.10316
ACTR8	93973	-1.07059	1.16533	1.16074	1.00934	-1.92751	1.0271	1.76511	1.08192	-1.14774	1.59563	-1.08813
ACTRT1	139741	1.60596	2.12872	3.22478	2.22479	inf	3.37968	9.61828	3.60147	2.93345	inf	1.51107
ACTRT2	140625	-4.72349	inf	inf	1.80209	-2.44078	-1.17437	inf	1.93561	2.27302	inf	-3.30591
ACVR1B	91	1.1215	-1.14369	-1.21717	1.1625	-2.131	-1.66223	1.53178	1.78962	1.34111	1.82509	-1.15355
ACVR1C	130399	-37.5759	-2.27489	-2.36046	3.12726	-1.7724	-2.71982	-1.96653	1.56971	6.95433	1.82271	1.22517
ACVR1	90	-1.38947	1.24389	1.26367	2.20404	-1.13466	1.14227	1.32313	1.36075	1.35075	1.92333	1.53157
ACVR2A	92	-1.92303	-1.34405	-1.4342	-1.33573	-1.45797	-1.19734	1.12831	-1.07262	1.20032	1.14797	-1.05235
ACVR2B	93	-1.02893	1.98403	1.87573	1.37676	-1.3949	1.08496	1.41051	1.55884	1.48584	2.12011	1.00687
ACVRL1	94	-2.20519	-3.14629	-3.3151	1.0604	1.66453	-2.07833	2.63774	-5.55869	-8.78226	1.40547	1.10037
ACY1	95	1.09094	-1.0807	-1.12538	1.13669	-7.33585	-4.06285	-1.1929	1.89748	1.18639	-1.86152	1.59023
ACY3	91703	2.13248	1.1944	1.13844	2.41381	-1.45545	-2.46297	-1.14743	10.1554	2.43446	-4.10776	-2.8439
ACYP1	97	1.37956	1.95312	1.98879	2.33388	1.25118	1.79929	4.44573	1.5197	2.149	2.63586	-1.08131
ACYP2	98	-1.59237	1.03659	1.06343	-2.22321	-1.12543	-1.06347	-1.03077	-1.36304	-1.16043	-1.04557	-1.08879
ADAD1	132612	12.0512	-1.20774	inf	inf	inf	inf	232.661	1.62751	14.5913	15.6586	1.0578
ADAD2	161931	-2.28568	5.77238	3.8998	-1.52011	-2.37265	-2.34072	1.23793	3.10482	4.75348	-1.58518	1.34734
ADAL	161823	-1.21622	-1.31932	-1.246	-1.13279	-2.26028	-1.52947	1.54968	-1.05011	1.41628	1.22318	-1.58602
ADAM10	102	-1.15063	-1.12749	-1.10583	2.06659	-1.21021	1.31517	1.90949	-1.13674	1.04768	2.61877	-1.40163
ADAM11	4185	-1.13591	-2.47904	-2.23575	1.05903	4.49774	2.85185	8.05129	2.80451	6.29314	-1.69871	1.53691
ADAM12	8038	2.25686	25.3407	27.8533	15.8549	3.37986	2.03422	9.25105	10.0545	7.5374	21.8865	5.55814
ADAM15	8751	1.64266	1.28167	1.30608	1.1274	1.30758	1.06545	4.06112	2.06509	1.27042	1.47741	1.62739
ADAM17	6868	-1.09619	1.50439	1.47534	2.16867	1.10356	1.10563	2.1407	-1.16733	1.47246	2.20055	-1.04547
ADAM18	8749	61.4062	3.75194	inf	10.368	15.7349	inf	inf	19.4971	336.346	inf	-2.1828
ADAM19	8728	3.08825	1.9342	2.02198	4.11016	2.92992	-1.45026	1.34486	1.82991	1.46325	1.41729	-1.43214
ADAM20	8748	-1.78487	-1.06125	1.13801	2.15395	1.34014	1.30178	1.02576	-1.50633	1.85764	2.06503	-1.40689
ADAM21P1	145241	1.33421	1.19103	1.28628	2.44436	-2.35034	-1.71288	5.96681	1.97713	1.78486	2.06729	-1.70253
ADAM21	8747	1.64597	1.14433	1.4184	2.42418	-2.22786	-1.45729	5.11752	1.91367	2.23832	2.06276	-1.6978
ADAM22	53616	-1.6294	1.60833	1.68771	1.74046	-1.50324	-3.20736	12.2598	2.1889	1.86078	3.96862	-4.31111
ADAM23	8745	-1.31637	-1.52144	-1.39679	5.35561	-1.94391	-1.62758	40.1049	1.30734	33.3193	-1.06557	-1.92938
ADAM28	10863	1.24835	-2.19425	-2.14137	-1.24076	2.01381	2.0771	3.09386	5.31731	2.19748	1.13145	-1.16696
ADAM29	11086	2.9642	1.34382	1.45596	1.46035	3.74197	1.44605	2.99021	-2.43401	-8.52716	2.42458	-1.3075
ADAM2	2515	6.04363	7.15753	8.97828	inf	7.41961	1.18109	inf	87.8399	23.8417	inf	inf
ADAM30	11085	3.68692	inf	inf	10.4285	inf	1.63781	9.46751	5.49364	inf	6.4151	-1.02877
ADAM32	203102	-1.17147	2.3619	2.23677	1.18629	2.08582	1.62467	12.8394	4.07638	7.24034	3.0087	-1.03877
ADAM33	80332	-6.90943	-4.28061	-4.21191	-1.93568	1.1715	-2.28032	3.79385	-1.93387	-2.91707	-2.76027	-4.0596
ADAM3A	1587	3.13714	inf	inf	1.82916	inf	inf	inf	inf	inf	inf	-7.06962
ADAM5P	255926	31.1054	inf	inf	inf	inf	inf	inf	inf	inf	3.77929	inf
ADAM6	8755	-1.12891	-4.64011	-4.90951	2.19021	3.76011	1.34263	-1.41391	4.53939	1.95569	-6.42114	1.00955
ADAM7	8756	21.4579	inf	inf	3.89151	11.9706	38.9796	inf	inf	inf	inf	inf
ADAM8	101	4.88263	2.42376	2.36499	4.99891	4.42232	2.51798	1.902	4.77833	1.79154	3.988	-1.06349
ADAM9	8754	1.25244	1.57224	1.63028	1.78335	1.23916	1.36528	3.20841	1.54133	1.41702	2.45959	-1.14563
ADAMDEC1	27299	6.22155	-11.6153	-11.5945	5.9797	22.9499	8.84564	4.89745	5.5566	5.2821	2.66326	-2.19719
ADAMTS10	81794	-1.2788	-1.05438	-1.00935	1.87469	4.31237	1.82168	3.6179	1.18377	-1.86637	1.45223	1.67007
ADAMTS12	81792	1.39088	13.267	14.6426	12.1341	2.13755	-1.82432	2.68596	3.7882	2.592	10.1654	1.86264
ADAMTS13	11093	1.28947	1.55255	1.48028	1.46994	1.00408	1.91765	-4.86986	1.68815	2.12722	-1.06923	-1.47967
ADAMTS14	140766	9.22178	2.93457	2.71763	5.96553	10.2598	10.4384	5.34062	7.34883	3.8336	9.82654	14.1289
ADAMTS15	170689	1.04344	-1.27139	-1.12247	2.90285	-5.27613	-1.58604	1.68155	-2.74751	-1.99792	-1.37998	-1.25732
ADAMTS16	170690	1.24606	1.04394	1.15883	1.8666	-7.01144	-1.52233	31.6795	6.72198	1.02005	1.70617	1.40282
ADAMTS17	170691	1.79034	-1.11949	-1.14566	1.54547	-1.40558	-2.8006	2.43775	-1.46155	2.44565	1.78582	1.57604
ADAMTS18	170692	-3.26033	3.94823	3.7645	1.27895	2.83452	-1.55258	15.7923	3.89362	13.1123	23.7102	6.0503
ADAMTS19	171019	5.52083	1.05814	1.17923	-2.64842	-43.0574	-59.2269	22.9577	9.84967	3.7824	1.81084	-1.45233
ADAMTS1	9510	-4.86429	-3.35202	-3.12627	-1.61174	-1.34023	-1.05703	-1.84375	-4.84044	-3.4473	-2.98544	-1.33604
ADAMTS20	80070	23.507	23.7004	20.116	103.149	39.6212	28.0635	166.816	44.4873	121.913	47.0976	-1.05462
ADAMTS2	9509	1.00159	4.43707	4.50132	8.54551	2.87603	1.50317	-1.21968	1.27873	1.15617	7.43799	1.4564
ADAMTS3	9508	-2.65903	1.45154	1.56778	1.49837	-1.23748	2.47549	2.83048	1.54153	1.2059	2.40317	-1.87278
ADAMTS4	9507	1.60128	2.15762	2.38691	1.41774	3.72988	-2.90116	-1.12663	-2.23693	-3.53971	1.25036	-1.1199
ADAMTS5	11096	-8.98757	-1.10343	-1.14756	-1.24723	1.62649	-1.97213	1.82548	1.314	1.25329	1.068	-1.88764
ADAMTS6	11174	2.31238	5.17986	5.39338	7.88187	-1.65382	-6.69082	4.29257	1.65834	-1.12762	2.67859	1.4805
ADAMTS7	11173	2.03584	2.312	2.28919	5.77355	5.87859	2.85708	3.43291	1.32567	-1.27934	2.97415	2.591
ADAMTS8	11095	-2.68246	-4.06217	-3.38312	-2.88611	-2.97073	-2.64556	1.57951	-10.5042	-30.8055	-1.95474	1.04545
ADAMTS9	56999	-2.49696	1.90878	2.01967	-1.19372	1.07194	1.98505	3.34916	-1.63218	-3.11141	2.11878	6.09615
ADAMTSL1	92949	-2.15846	-3.84698	-3.64852	-1.00188	-2.08792	-15.9158	1.6917	-1.86062	-1.31958	-2.868	-1.11212
ADAMTSL2	9719	3.25321	3.14116	3.16877	4.14134	-2.59485	-6.42939	-1.83727	-1.37075	-3.13519	3.2037	1.69317
ADAMTSL3	57188	-2.0722	-8.02786	-6.76326	-2.23427	1.0366	-1.57315	-1.27603	-5.15766	-6.19837	-2.59997	-1.1535
ADAMTSL4	54507	-3.77391	-2.44564	-2.36904	-1.25488	4.28659	2.91809	1.47208	-3.42846	-5.00385	-1.89778	1.44729
ADAMTSL5	339366	1.62225	2.56695	2.5271	1.26905	-1.1051	4.26614	2.85883	3.53282	3.98213	1.4151	2.24048
ADAP1	11033	2.09802	1.18345	1.15206	1.76301	-2.51963	-1.54966	2.3032	1.44301	-1.23477	2.99752	1.29309
ADAP2	55803	1.06164	-1.59727	-1.62257	1.48615	3.39523	2.07659	-1.032	1.18404	-1.60623	2.27076	1.59561
ADARB1	104	-1.53699	-1.40455	-1.27099	1.73749	1.32172	-1.5214	1.58956	-3.36469	-4.50671	-1.72371	1.28898
ADARB2	105	-1.28024	-1.96769	-2.00634	-1.61184	1.26316	1.32883	1.92434	-1.8804	1.58438	-1.77395	2.6797
ADAR	103	1.78905	1.20827	1.18296	2.25396	-1.22543	-1.44463	2.05858	1.54751	1.19035	2.20103	1.02868
ADAT1	23536	-1.0697	1.29122	1.30709	1.72582	-1.84935	-1.18138	1.68369	1.44195	1.18056	2.54458	-1.23153
ADAT2	134637	-1.48599	3.15831	3.07637	1.79132	1.56688	1.87259	3.12858	1.34121	1.566	3.27201	-1.50715
ADAT3	113179	2.07673	-1.11746	-1.16817	1.30822	-1.03577	-1.07686	1.80795	1.26209	1.67863	1.22936	-1.10331
ADA	100	1.30839	2.04028	2.07756	4.02914	4.45509	2.46264	2.92263	2.15168	4.03022	-2.08298	-1.04034
ADCK1	57143	1.0405	1.22234	1.21515	1.11991	-1.83777	-1.25385	2.4767	1.31373	1.21211	1.60287	1.08845
ADCK2	90956	1.4011	1.09885	1.08645	1.251	1.39968	1.6393	2.39816	1.10981	1.41518	1.50922	-1.03876
ADCK4	79934	1.34673	1.21913	1.18767	1.23546	1.24003	-1.02608	1.60771	1.25415	1.38269	1.37961	-1.0093
ADCK5	203054	2.42501	1.58002	1.50797	2.24767	1.32488	1.35912	3.03299	3.69273	3.27922	2.18826	1.1017
ADCY10	55811	1.03307	-1.16059	-1.25256	13.359	4.33631	1.55117	1.47724	2.1094	43.9482	2.05346	2.11781
ADCY1	107	1.782	1.40775	1.51372	1.03102	-1.58049	-7.6243	-1.23905	1.21507	1.24355	3.55724	-1.15707
ADCY2	108	1.25856	-5.05056	-4.37644	-3.60427	7.13524	14.3025	12.9179	1.09597	5.6888	-2.10655	1.23037
ADCY3	109	-1.52517	2.33867	2.29977	2.18805	1.88181	-1.22613	2.19602	1.01686	1.5675	2.30342	1.06978
ADCY4	196883	-3.29723	1.04133	1.0527	-1.14962	1.56865	-6.75184	2.67127	-3.70502	-6.39542	1.45375	1.03595
ADCY5	111	-2.50467	-6.80118	-6.6156	-1.6306	1.03978	-2.5506	1.27905	1.27946	-1.00774	-3.28584	-1.55467
ADCY6	112	-1.63284	-1.60107	-1.65236	-1.45572	-1.44494	-1.2645	3.96317	-1.02532	-1.92941	1.69252	-1.01809
ADCY7	113	1.05644	-1.04774	-1.01876	1.88202	3.2553	2.78779	1.76365	-1.21025	-1.79949	1.88809	1.13107
ADCY8	114	1.25873	-2.20673	-2.32673	-2.50639	10.4798	-1.07243	15.7596	-9.60188	1.85441	-1.01574	103.354
ADCY9	115	1.24001	-2.48258	-2.53504	1.01991	-1.06907	1.10801	1.54877	-2.09579	-3.11703	-1.24768	-1.38203
ADCYAP1R1	117	-10.3234	-26.3307	-17.5832	-2.41919	4.39929	-1.11587	-1.16417	-5.34269	-2.83359	-10.2614	1.3518
ADCYAP1	116	1.73811	-1.52149	-1.52719	-1.24882	1.60082	1.36243	1.07088	-1.13585	-2.41509	-1.30293	-1.71259
ADC	113451	1.59274	-1.53616	-1.63435	2.77722	1.4647	1.2944	2.54112	2.70853	1.29326	1.74585	1.40689
ADD1	118	-1.45182	-1.60589	-1.58906	1.09741	-1.12083	-1.03288	1.70856	-1.5295	-1.88018	-1.17324	1.00383
ADD2	119	1.0853	-2.07684	-1.73014	9.24786	5.91804	6.47223	2.92482	1.3191	6.24743	1.58989	-1.43526
ADD3	120	-2.76999	1.06554	1.08116	1.0887	-1.62859	-2.45935	1.52564	-1.11967	1.2342	2.1217	-2.07792
ADH1A	124	-35.996	-16.6198	-15.5409	-10.8816	-1.33786	-10.0095	-2.42585	-7.93885	-14.6136	5.70523	-8.91166
ADH1B	125	-34.4866	-17.9081	-15.615	-33.1846	-7.22488	-14.097	-2.34783	-8.76393	-30.532	-3.35473	-11.0112
ADH1C	126	-11.438	-15.5941	-16.8694	-1.50388	-13.2661	-24.103	-2.04737	4.54678	9.52818	-1.48953	-8.9744
ADH4	127	-20.6737	1.52455	1.54438	-17.0211	3.64637	-19.636	-3.49173	9.23094	-1.2343	-3.54265	-1.94264
ADH5	128	-1.95325	-1.51506	-1.45325	1.88903	-1.62764	-1.70057	1.13009	-1.17228	1.21827	1.02647	-1.57363
ADH6	130	-2.20748	-2.57693	-2.42106	-10.3544	-6.78883	-7.13204	-1.90911	1.82008	-2.62289	-1.31409	-2.76432
ADH7	131	-1.57097	-7.16799	-6.99357	-2.41445	13.1483	3.01925	1.55597	1.94087	52.4849	-21.6888	9.57337
ADHFE1	137872	-4.39018	-8.1485	-7.99984	-4.77973	-2.65534	-1.09834	-1.17979	-1.6059	-2.11413	-4.58558	-1.62734
ADI1	55256	-1.32245	-1.03563	-1.01584	1.1652	-2.06301	-2.31324	-1.32552	1.12234	1.2088	-1.06235	-1.07244
ADIG	149685	-2.5748	inf	inf	1.1632	-4.05011	2.29536	7.66139	1.68434	8.99481	inf	-2.87644
ADIPOQ	9370	-37.4724	-2.24495	-1.90501	-42.3621	-3.14362	-28.7926	74.548	1.80811	13.5852	-2.31153	-5.4911
ADIPOR1	51094	1.76888	1.29416	1.27661	1.20049	-1.13925	-1.32412	1.95447	1.1579	1.12221	1.23096	1.04715
ADIPOR2	79602	1.08166	-1.0355	-1.03545	1.34574	-1.08268	-1.10672	1.04602	-1.46227	1.16108	1.2245	-1.62742
ADK	132	1.06138	1.88551	2.03018	1.58202	-2.47297	-1.39808	-1.36061	1.44899	1.11266	1.54073	1.91791
ADM2	79924	3.93579	2.15574	2.00916	1.29968	1.75581	1.33579	7.42083	12.1277	7.42252	1.92576	-2.00556
ADM	133	-2.95714	-1.21425	-1.19865	2.2995	6.13494	-1.20347	-1.54467	1.20287	3.36467	1.27261	3.95077
ADNP2	22850	1.06257	1.03952	1.08163	1.36895	-1.2955	-1.3624	1.9474	1.07264	1.29903	1.66168	-1.3974
ADNP	23394	1.2935	1.90998	1.85716	1.48005	-1.19213	-1.17377	2.04506	1.34689	1.71375	2.22375	-1.27312
ADORA1	134	-1.10748	1.98647	1.96051	-1.62201	-2.42421	1.83524	5.88891	2.35398	-1.47084	2.89425	5.85144
ADORA2A	135	5.23902	-1.89383	-1.97276	2.32872	1.80048	-2.08983	2.00357	-1.64942	-2.49868	1.03304	-1.26069
ADORA2B	136	-1.45558	-1.36814	-1.47942	1.83337	2.53754	1.29049	3.32075	1.89741	2.43656	2.00638	1.61209
ADORA3	140	1.45586	-3.75521	-4.24874	2.02306	7.36715	10.5738	-1.37997	1.59696	-1.26797	1.6095	1.60721
ADO	84890	1.04398	1.50611	1.51402	1.54046	-1.32472	-1.00201	1.39374	-1.02944	1.22224	1.93172	-1.38354
ADPGK	83440	1.21535	1.37928	1.3911	2.23809	1.54008	1.07339	1.83907	-1.08914	1.06031	2.48512	1.02849
ADPRHL1	113622	1.32924	-1.10038	-1.16446	-5.67973	-2.64161	1.04704	2.6153	2.81637	1.51535	1.68023	-1.69441
ADPRHL2	54936	1.35619	1.23432	1.23515	1.45343	1.65678	1.286	1.83309	1.13517	1.01908	1.47958	1.25607
ADPRH	141	-1.78939	-1.02323	-1.00884	1.17488	1.31011	-1.1472	1.56892	-2.8537	-3.46231	1.39294	-1.2867
ADRA1A	148	-24.3989	-7.18683	-6.87296	-6.74927	-1.07226	-2.06205	-6.04662	-10.8754	-12.4249	-2.85357	-1.88782
ADRA1B	147	-1.74299	-2.73772	-2.74915	3.11695	2.63698	-2.08311	-1.93899	-1.43481	-4.00725	1.03094	4.96354
ADRA1D	146	1.03713	-3.06506	-2.26866	1.75141	-2.07373	-1.19818	7.67346	-3.50807	-1.54288	-3.4109	1.06945
ADRA2A	150	-2.74162	-3.19388	-3.4335	-1.34962	-1.92608	-3.04574	3.44224	2.84698	-1.40322	2.20767	-1.36252
ADRA2B	151	-2.1511	-1.12616	-1.24967	1.43854	1.36165	-6.16447	-3.02234	1.52354	8.15311	1.56944	1.16919
ADRA2C	152	-1.01546	3.71014	3.17178	2.37015	-2.95721	-4.79767	18.163	-1.36398	1.57528	2.98248	4.39912
ADRB1	153	-2.73495	-1.84346	-1.80473	-1.67073	-2.8942	-7.19322	-1.70252	-8.11926	-11.2996	1.71262	1.00491
ADRB2	154	-7.12376	-3.62881	-3.52743	-1.1832	-1.0481	2.19835	-1.32205	-8.08845	-7.73527	-3.24136	-1.5497
ADRB3	155	-8.51924	-4.611	-4.31536	4.365	-1.95428	1.14916	7.33286	1.267	-1.25829	-3.92745	9.80591
ADRBK1	156	1.45776	1.38706	1.38195	1.56308	1.47214	1.06578	1.76716	1.2456	1.18567	1.89431	1.07676
ADRBK2	157	-3.53331	1.4605	1.44444	2.31211	1.22716	-1.00515	3.08393	-1.40015	-1.54157	1.83235	-1.28245
ADRM1	11047	1.82377	2.21362	2.1105	1.7723	1.22988	1.30731	1.79261	1.64343	1.93165	2.10511	1.21869
ADSL	158	-1.02466	1.38354	1.42621	1.31667	1.19285	1.04506	2.27239	1.45018	2.10004	1.62362	1.02808
ADSSL1	122622	-1.94073	-1.47143	-1.52697	-3.7562	4.79077	-2.56478	1.21164	3.28329	2.5738	1.27417	-1.05468
ADSS	159	1.74693	1.32391	1.34184	1.59633	-1.72063	-1.38037	2.08282	1.59253	1.90148	1.94451	1.26211
AEBP1	165	2.11052	2.01994	2.00819	3.9714	1.6313	1.15867	1.99616	1.44703	-1.07485	1.88028	1.3654
AEBP2	121536	-1.28087	1.44282	1.48086	1.57949	-1.17461	-1.05916	1.42026	1.13357	1.92514	1.53532	-1.113
AEN	64782	1.25896	2.49782	2.63817	1.62752	2.40356	2.17133	1.9885	1.35864	1.22103	2.47379	1.35154
AES	166	1.12127	-1.31568	-1.28445	-1.21073	-1.02324	1.04472	1.5088	-1.33748	-1.36894	-1.22758	1.10477
AFAP1L1	134265	-3.07065	1.29027	1.30375	1.74488	2.6468	-1.49841	2.4303	-3.18521	-4.06007	1.89838	1.18931
AFAP1L2	84632	-1.74416	-1.00532	1.07577	3.12296	-3.94172	-12.4352	1.6969	1.40294	1.85612	1.08953	-1.59878
AFAP1	60312	-1.15806	1.02279	1.04763	1.85532	1.30235	-1.13751	2.96975	1.36108	1.24716	1.25499	1.23603
AFF1	4299	-1.59576	-1.54073	-1.51191	-1.09552	-1.35108	-1.58062	1.09799	-1.27809	-1.83582	-1.03682	-1.09711
AFF2	2334	-2.32107	-2.9847	-2.12246	5.44289	2.07117	4.10887	56.4838	-1.17585	1.68714	3.11438	3.12869
AFF3	3899	1.63699	-7.59624	-6.44318	-1.84982	2.63319	1.48359	2.29242	-5.29006	-9.91836	-2.68799	-1.28353
AFF4	27125	-1.08606	-1.21829	-1.18516	-1.00452	-1.12523	-1.1756	1.03089	-1.06621	-1.42046	1.14429	-1.21402
AFG3L2	10939	1.12963	-1.57673	-1.53699	1.18808	-1.50617	-1.45225	1.32906	1.19177	1.64049	1.55654	-1.41929
AFMID	125061	1.02476	2.01945	2.00355	1.49432	-2.40003	-2.07733	1.24736	1.5165	1.63664	1.61507	1.31003
AFM	173	-2.1277	3.62304	2.9768	-1.26784	-29.3675	-280.711	-2.75628	6.10943	34.5433	24.0073	inf
AFP	174	-2.45944	11.6952	10.3197	6.88526	-7.05498	-3.9255	238.579	1403.96	10.0683	158.42	2.85756
AFTPH	54812	1.26064	-1.10037	-1.12016	1.081	-1.46234	-1.57098	1.46553	1.16637	1.37525	1.67968	-1.21617
AGAP11	119385	-5.40684	-1.77274	-1.74406	1.33974	3.6002	3.02842	2.36264	-4.08916	-3.34787	-2.33398	-1.64944
AGAP1	116987	1.06459	-1.20096	-1.2019	1.05245	-1.1116	-1.33557	2.48395	1.52163	1.24739	1.30921	1.09472
AGAP2	116986	1.31618	1.16493	1.22714	1.89083	7.19426	2.32141	2.70729	1.00774	-1.36558	1.88085	-1.32749
AGAP3	116988	1.0399	2.2751	2.26679	1.33818	1.73679	1.63516	1.93139	-1.04576	-1.10614	1.5184	1.06732
AGAP4	119016	-1.11403	1.8161	1.74495	1.97697	2.51021	2.36255	2.77753	1.51999	1.27564	2.12847	-1.13308
AGAP5	729092	-1.28932	1.40363	1.35391	1.3335	1.89201	1.45267	2.82658	1.46226	-1.09716	1.91774	-1.67188
AGAP6	414189	1.00947	2.23063	2.11573	2.1309	3.12178	2.16438	2.89894	1.51338	1.26658	2.43972	1.0807
AGAP7	653268	1.12046	2.46816	2.01988	2.35464	2.73395	2.1691	3.13607	1.55342	1.74347	2.16182	1.17486
AGAP8	728404	-1.23885	2.21462	2.05375	2.09859	2.85045	2.49831	3.05336	1.69647	1.28844	1.87379	-1.18541
AGA	175	1.16092	-1.10441	-1.09423	1.09448	-1.20096	1.06583	1.82642	1.75615	1.15784	1.10628	1.01521
AGBL1	123624	-49.2888	-1.1616	1.13694	-7.8708	15.2654	-3.748	1.49309	-10.2694	-10.2957	2.38509	-1.14272
AGBL2	79841	1.68275	1.17745	1.04246	-1.89968	3.00248	4.65371	3.10007	-1.56242	-2.11793	4.65757	-1.47398
AGBL3	340351	-1.17539	1.34904	1.51872	-1.33218	2.69966	1.58019	3.18546	-1.112	-2.18522	1.10331	-1.05719
AGBL4	84871	1.30401	1.69189	2.1063	-1.50929	-8.51087	-3.99776	-2.85624	-1.31762	-1.15797	1.44211	-1.86376
AGBL5	60509	-1.05742	1.29688	1.30397	1.33912	-1.27799	-1.03867	2.91693	1.28591	1.72904	1.09068	-1.21415
AGER	177	-1.03598	1.72687	1.82506	2.09649	5.58506	2.52613	2.97208	-29.2475	-59.7064	1.5075	-1.18702
AGFG1	3267	-1.231	1.36337	1.36009	1.54771	-1.17199	1.11363	1.91027	1.02156	1.07361	1.84387	-1.0941
AGFG2	3268	-1.29761	-1.86939	-1.9638	-3.1262	-2.52132	-1.59208	1.67388	1.08897	-1.45772	-1.06732	-1.00661
AGGF1	55109	1.06593	1.14395	1.14653	1.17416	-1.18532	-1.10108	1.75509	1.11598	-1.05687	1.66457	-1.1194
AGK	55750	1.12413	1.70558	1.70249	1.60243	-1.27397	1.29696	1.86324	1.56356	1.75694	1.59254	1.05348
AGL	178	1.08364	-1.53824	-1.46336	-2.33689	-2.22274	-1.51737	-1.80478	1.27661	1.38236	1.20646	-1.52073
AGMAT	79814	2.48275	1.57222	1.52171	1.32849	-5.58184	-11.629	-1.26247	8.63283	6.51552	2.34588	-1.36038
AGPAT1	10554	1.06885	-1.13636	-1.13855	1.19252	-1.18954	-1.28254	2.60426	1.17523	-1.09033	1.08925	-1.18186
AGPAT2	10555	-3.41607	-1.16966	-1.25364	1.35739	-1.30443	-1.48286	-1.17847	1.23418	-1.68042	1.20796	1.56884
AGPAT3	56894	1.17065	-1.22609	-1.27319	-1.33457	-1.39473	-1.93839	1.44225	1.03384	-1.10762	1.25766	-1.23358
AGPAT4	56895	-1.56068	-1.04747	1.06091	2.32653	-1.85003	1.07868	4.54277	-2.12505	-1.61375	1.3791	-3.69489
AGPAT5	55326	1.21849	1.2626	1.28248	1.36783	1.18739	-1.00073	1.65021	1.56	1.91444	2.88162	1.1647
AGPAT6	137964	1.4749	1.58	1.5499	1.40503	1.02404	1.35963	1.92201	1.52817	-1.04016	2.00448	-1.05656
AGPAT9	84803	-3.41747	-5.41022	-5.37526	-1.29136	-6.1884	-9.44403	-1.34669	1.05522	1.61956	-2.74131	-2.11826
AGPHD1	123688	-1.45714	1.03999	1.0464	-1.34169	-5.17399	-2.52781	1.78132	1.6683	1.7428	1.03257	-1.79883
AGPS	8540	-1.11658	-1.0143	1.00167	1.67959	1.05619	1.5161	1.45108	1.082	1.11607	2.11531	-1.20049
AGR2	10551	5.22747	1.00531	1.19167	-3.7094	-5.55812	-1.01878	33.8199	5.6932	1.09664	1.44848	12.1868
AGR3	155465	5.08664	-2.17622	-1.85914	-9.1053	-7.53291	2.60195	3.35655	-1.24425	-7.98731	1.83949	-12.5242
AGRN	375790	1.45865	2.26494	2.3162	3.95333	1.09777	1.19857	3.22053	1.59228	1.60624	4.60002	1.9921
AGRP	181	2.56346	2.45696	2.24732	3.06707	-7.8642	-6.37988	5.44851	-7.44717	-29.1664	2.92127	4.23961
AGTPBP1	23287	-1.32202	1.65393	1.67935	1.21618	-1.26204	-1.43008	1.69461	-2.3147	-2.12558	2.0133	-1.24441
AGTR1	185	1.26528	-8.81486	-8.48804	-2.47091	1.10205	-8.18478	-1.73488	-3.33585	-7.58248	-3.48309	-2.41306
AGTR2	186	-2.72835	-6.69633	-4.67612	-2.14116	-6.4214	-26.1888	100.914	-5.4117	-10.2221	-1.69084	-3.24382
AGTRAP	57085	1.65262	2.0136	2.05563	2.81531	1.0636	1.18369	2.34037	1.26852	1.15888	2.19231	1.49722
AGT	183	2.81912	4.39108	4.0306	-2.57817	2.011	1.28756	1.33354	7.14149	-1.22519	5.01398	2.27234
AGXT2L1	64850	2.95784	1.0568	1.38237	-15.7685	-7.16747	-2.47491	-1.02794	169.48	-1.99711	-5.05624	-1.75957
AGXT2L2	85007	-1.64672	-2.05309	-2.13215	1.04172	2.63984	1.22004	-1.06388	-1.02429	-1.55126	1.05395	-1.18036
AGXT2	64902	2.2575	-22.3272	-24.1499	1.07345	-2.46225	-4.84774	-2.45234	18.0333	-2.34791	-2.45263	1.02794
AGXT	189	2.15883	-1.79052	-1.71545	-1.24261	-5.33847	-42.2142	-1.64367	16.1136	4.90407	1.48751	7.40656
AHCTF1	25909	1.24994	1.67902	1.69035	1.7997	-1.12127	-1.28813	2.40158	1.51215	1.69901	2.18083	-1.25422
AHCYL1	10768	-1.10137	-1.09879	-1.08146	1.0092	-1.89844	-1.58139	1.3587	1.11103	-1.12461	-1.002	1.04078
AHCYL2	23382	1.01716	-5.85984	-5.81825	-1.29282	-1.96065	-1.86455	1.59312	-1.12654	-5.17501	1.67042	-1.94532
AHCY	191	1.59076	2.89522	2.85603	1.44974	-1.5268	-1.64189	1.59949	2.06543	3.30882	2.35128	1.05006
AHDC1	27245	-1.39892	-1.14318	-1.10788	-1.16746	1.00376	-1.35699	1.4654	1.64458	1.944	-1.37503	1.03047
AHI1	54806	-1.08498	1.5228	1.60449	1.41344	-1.3656	-1.23061	1.86004	1.06564	-1.16065	1.60782	-1.10098
AHNAK2	113146	1.03919	-1.80959	-1.54514	1.9905	16.2306	17.9054	9.48128	4.76762	7.7442	-2.48787	11.5192
AHNAK	79026	-3.15239	-2.73833	-2.42882	-1.3088	-1.10649	-1.04203	1.66562	-3.87122	-2.78373	-2.07491	-1.27908
AHRR	57491	1.65553	-2.3292	-2.33602	2.00018	2.59401	1.35526	7.66196	-1.06062	1.43801	1.61132	1.03427
AHR	196	-1.63752	1.50622	1.5721	2.14239	1.521	2.96371	-1.02054	-1.03226	-1.30352	2.45848	1.91635
AHSA1	10598	1.36493	1.49739	1.48431	1.83379	-1.39788	-1.01407	2.08969	1.49478	1.78312	1.8172	-1.04003
AHSA2	130872	-1.25647	2.50552	2.38206	2.53774	4.37448	3.15494	4.37095	1.70511	1.9558	2.17275	-1.03998
AHSG	197	4.58512	3.46075	2.60594	1.78052	-1.30184	1.22568	-1.30344	24.3414	22.0547	67.7556	17.5671
AHSP	51327	-2.01691	-1.04487	-1.19887	-5.93646	4.30243	2.06888	2.03661	-2.77466	-6.04556	-1.21252	-1.34666
AICDA	57379	3.71486	-6.69414	-4.33866	5.2045	28.3519	9.80027	5.1958	-1.71649	-1.61315	1.31114	-7.34065
AIDA	64853	-1.06875	1.34866	1.37658	1.81214	1.40523	1.29684	2.09968	1.0695	-1.13453	1.59056	1.10765
AIF1L	83543	-1.96733	-1.8055	-1.66009	-3.04035	-10.412	-2.90724	5.16446	-1.22005	-1.94769	-3.13267	-2.98161
AIF1	199	-1.11832	-1.94184	-1.94526	1.39728	1.93689	1.3684	1.07231	-1.61745	-2.80141	1.51371	1.21916
AIFM1	9131	1.45369	1.28293	1.23888	1.38069	-1.85486	1.00401	1.24917	1.84693	1.5229	1.57483	-1.09164
AIFM2	84883	-3.66712	-1.03072	-1.07106	1.33204	1.08677	1.1285	2.81243	1.80625	1.24711	1.8511	-1.27308
AIFM3	150209	2.83967	-1.99268	-2.17323	2.58513	1.46756	2.84835	4.14957	2.21405	2.52669	3.98485	1.29143
AIG1	51390	-1.30004	1.34202	1.31272	1.15358	-1.05639	-1.03497	-1.21646	1.1457	1.07939	-1.03536	-1.10688
AIM1L	55057	15.2014	-1.05725	-1.1308	-1.74208	1.57311	2.7509	10.6931	2.19774	5.0276	-1.63425	7.53162
AIM1	202	-1.42316	-1.4939	-1.58179	-1.29895	-1.15821	-1.63305	-1.28443	1.09917	1.47344	-1.16698	-1.03331
AIM2	9447	4.19494	1.48466	1.71176	14.5674	8.09837	2.59254	1.74381	8.37886	5.20595	3.16215	-2.81195
AIMP1	9255	1.12653	1.34619	1.38325	1.26726	-1.18837	-1.12803	2.05572	1.2424	1.17092	1.67044	-1.08957
AIMP2	7965	1.63228	1.32756	1.28165	1.33285	-1.53789	-1.00268	1.88302	2.234	2.36478	1.69471	-1.23583
AIPL1	23746	6.34516	2.06808	2.02802	5.82999	5.36272	2.4366	1.46896	1.50899	3.6394	1.65382	-3.01711
AIP	9049	1.14655	1.09504	1.10314	1.82208	1.10533	-1.09334	1.66264	1.05171	-1.19316	1.18376	1.17375
AIRE	326	1.43683	5.52425	5.42547	2.40992	1.92551	2.28227	16.3979	4.24623	18.0185	11.4927	-2.22771
AJAP1	55966	-1.18133	-1.12245	-1.10497	6.44714	-2.35574	-1.00013	1.66958	-3.35886	1.07562	-1.05043	2.39224
AK1	203	1.01568	-1.27368	-1.31415	-2.06579	-1.96527	1.32871	1.69165	-2.11383	-4.99618	1.15245	2.20728
AK2	204	1.13945	1.04286	1.03715	1.62728	-1.20121	-1.46759	1.20571	1.64326	1.2703	1.59265	-1.05632
AK3	50808	-1.95153	-1.22344	-1.24611	-1.19563	-2.91079	-2.43416	-1.21438	-1.25221	-1.20351	1.02866	-1.07063
AK5	26289	-5.41823	-3.24997	-2.71824	1.37805	-1.30661	1.54152	2.49189	1.96389	1.73767	-3.18899	-1.6549
AK7	122481	-1.07666	-1.35217	-1.30887	-3.58526	-3.44949	1.19066	1.83464	-2.4401	-4.19919	2.25561	-2.77849
AKAP10	11216	-1.2587	-1.22802	-1.18602	1.44028	-1.11063	1.03777	1.40779	1.0122	-1.11543	1.32875	-1.45786
AKAP11	11215	-1.61806	1.59178	1.61567	1.19512	-1.4582	-1.56738	1.08377	-1.54118	-1.70927	1.4628	-1.24673
AKAP12	9590	-6.5713	-2.52718	-2.11277	-1.597	-1.03834	1.29679	1.15599	-2.00571	-4.95556	-2.07015	-2.49316
AKAP13	11214	-1.51139	-1.42349	-1.41884	1.13787	1.34759	-1.00304	1.38155	-2.01453	-3.02854	1.52499	1.00755
AKAP14	158798	21.2985	3.30211	3.12273	-25.0866	-1.26298	-1.03333	11.7214	-4.1117	-6.88368	3.71103	3.44012
AKAP1	8165	-1.46897	1.18666	1.15984	-1.19729	-1.55031	1.05808	1.38986	1.46888	1.29176	1.30762	-1.3284
AKAP2	11217	-3.31372	-1.60118	-1.48977	1.04619	-1.12998	-3.47699	-1.31934	-6.2653	-10.2185	-1.43063	-2.49233
AKAP3	10566	-1.70588	-1.32966	-1.28555	-1.26755	-5.68325	-1.54051	-1.6296	-1.27825	-1.30145	1.17788	-2.4685
AKAP4	8852	-2.31864	87.3101	87.7145	-1.31741	-6.20472	-14.4663	-1.11568	-7.56036	-6.40732	44.6052	-1.18485
AKAP5	9495	2.43639	-2.45032	-2.48066	2.75488	-2.92287	1.45705	2.7721	-1.63782	-2.78819	2.84858	-1.2943
AKAP6	9472	-4.59844	-3.9976	-3.62469	-2.52807	-1.49935	-1.60082	-1.1362	-1.39797	-2.63485	-3.78038	-1.55365
AKAP7	9465	-1.92839	-2.14534	-1.88887	-1.1969	-1.10149	1.49822	1.16358	-2.08654	-1.552	1.26295	-1.45239
AKAP8L	26993	1.3726	1.80779	1.7726	1.59806	1.14827	1.16155	2.77971	1.29161	1.36674	1.41275	-1.06335
AKAP8	10270	1.04531	1.34143	1.33801	1.38091	1.56752	-1.15978	1.97618	1.04438	1.20903	1.6827	-1.31305
AKAP9	10142	1.02602	-1.8753	-1.97631	-1.09093	-1.9466	-1.67526	1.07084	-1.26658	-1.36853	1.9717	-1.23755
AKD1	221264	1.05289	1.4515	1.4664	-1.73685	-1.66562	-1.23268	1.95189	-1.17276	-1.90789	1.21155	-1.16392
AKIRIN1	79647	-1.09126	-1.14456	-1.09166	1.45434	-2.28689	-2.24172	-1.02867	1.02176	1.00396	1.24564	-1.42219
AKIRIN2	55122	-1.21987	1.37071	1.32969	1.23767	-1.03501	1.22931	1.38571	-1.35733	-1.00364	1.42374	1.20613
AKNAD1	254268	-1.57358	5.27276	4.92801	2.78319	-1.13642	-2.0383	5.13914	-1.37299	1.03162	-1.62583	-2.7708
AKNA	80709	-1.14527	-1.31986	-1.34012	1.62672	2.57273	1.30942	1.2764	-1.24538	-2.26974	1.45303	1.05187
AKR1A1	10327	1.36058	1.04657	1.05033	-1.02141	-1.39145	-1.57375	1.12538	1.39942	1.23507	1.06329	1.09948
AKR1B10	57016	1.22443	-8.06373	-7.74413	2.08548	6.11627	72.15	15.3677	237.088	296.473	-2.85545	43.9612
AKR1B15	441282	-1.32684	-5.0967	-5.01029	2.12994	6.89112	62.9039	19.921	183.276	687.52	-1.59955	2.03075
AKR1B1	231	-1.39614	-1.51741	-1.49082	1.49454	-2.00068	-1.20568	2.53797	1.27467	1.41187	1.47628	1.16133
AKR1C1	1645	-11.7384	-2.13077	-2.0353	5.52346	-2.31653	4.60314	2.30166	10.2602	25.2415	-3.19579	-1.40988
AKR1C2	1646	-10.3412	-2.46009	-2.46019	4.19291	-2.27298	8.85892	2.85584	23.5961	46.6231	-3.24869	1.3789
AKR1C3	8644	-5.48928	-1.84113	-2.09139	5.53464	1.45533	1.97821	4.66116	3.90214	10.3226	-1.71677	1.37947
AKR1C4	1109	-4.0733	127.034	86.274	5.9011	2.55579	2.81585	-1.01325	163.494	57.8747	4.42606	-1.67232
AKR1CL1	340811	-3.03525	35.7666	25.1374	4.9183	3.65466	1.84784	2.50868	4.04835	4.24097	27.5751	-1.4178
AKR1D1	6718	-4.82456	-1.3368	-1.7904	1.07906	15.7118	56.9174	-2.43952	14.6525	6.35083	2.61387	-2.11615
AKR1E2	83592	-1.07332	3.24149	3.318	3.93105	1.01015	1.37424	3.2408	3.12262	3.42616	2.21236	-4.22017
AKR7A2	8574	1.17626	-1.38741	-1.39725	1.14271	-1.34775	-1.61454	1.38102	1.2032	1.16024	-1.08879	-1.12956
AKR7A3	22977	5.84753	-1.89783	-1.91488	1.46023	-3.13958	-2.11702	-1.98908	55.7669	9.82514	-1.66461	-1.19072
AKR7L	246181	2.91127	-1.22877	-1.11167	1.60579	-1.1201	-1.1978	-1.28451	7.82358	2.37517	2.02814	-1.35431
AKT1S1	84335	1.42505	1.21458	1.22062	1.37976	1.21067	1.08285	2.10907	1.34615	1.73465	1.35592	-1.07871
AKT1	207	1.4587	1.00539	1.03721	1.66758	-1.00417	-1.12357	1.09233	1.01609	1.01728	1.29779	1.17303
AKT2	208	-1.10852	1.2054	1.20709	1.11555	-1.38415	-1.15248	1.29353	1.23792	1.67989	1.16456	-1.262
AKT3	10000	-1.86246	-1.84841	-1.64824	2.44454	-1.11608	-1.25903	1.61959	-1.8951	-1.41031	-1.51517	-1.08801
AKTIP	64400	-1.15495	-1.14166	-1.12408	-1.324	-1.40192	-1.11312	1.28323	-1.22166	-1.66454	-1.1536	-1.07245
ALAD	210	-1.74252	-1.51244	-1.57266	-1.38383	-2.53309	-3.18655	-1.02223	-1.18779	-1.66212	-1.1112	-1.29774
ALAS1	211	-1.01913	-1.36104	-1.37555	-1.1715	-2.2189	-1.12763	-1.5664	-1.32372	-1.77722	1.2918	-1.12677
ALAS2	212	-22.6978	-3.37965	-3.05628	-3.42638	-1.41353	8.39213	-1.27381	-22.59	-30.5571	-1.52126	-3.67069
ALB	213	-1.01152	4.23096	2.13143	-1.40767	-2.92363	-142.797	-2.45781	901.21	1.20035	299.773	2.38235
ALCAM	214	1.3701	2.02111	2.21821	1.43596	1.00552	1.17312	2.07161	-1.37488	-1.29469	1.82859	1.02484
ALDH16A1	126133	1.46086	1.07741	1.0801	1.73001	-1.09738	-1.20954	1.97342	-1.06321	1.46142	1.59812	-1.0359
ALDH18A1	5832	1.86154	-1.04831	-1.11929	1.29274	1.12722	1.27873	2.18954	3.29866	2.56145	1.96353	-1.24294
ALDH1A1	216	-5.8149	-1.79301	-1.6702	-1.7795	1.02333	2.20608	1.48825	-1.82989	1.33719	1.07348	-2.60635
ALDH1A2	8854	-8.0047	1.92692	2.42605	-3.54489	-3.77656	-1.39027	2.38025	-1.56099	-8.11199	-1.15448	-3.4069
ALDH1A3	220	-3.50942	1.68397	1.79815	-2.15772	-3.21709	-1.00454	-1.11512	1.30833	1.11629	1.71452	6.40973
ALDH1B1	219	1.54617	1.6176	1.56984	1.28947	-2.50583	-2.09634	-1.64571	2.28912	1.79679	1.54008	-1.97184
ALDH1L1	10840	-30.5252	-1.32312	-1.26122	-5.23114	-2.37628	-2.0968	1.00855	2.92922	5.83274	-1.31102	1.55585
ALDH1L2	160428	1.24403	1.36872	1.29978	2.62475	2.36807	1.53471	3.22139	2.32793	2.44921	1.81927	-1.52876
ALDH2	217	-5.00775	-1.25402	-1.27842	-1.6983	-1.95301	-1.06552	-2.18301	-2.09407	-4.15373	-1.31102	-1.73544
ALDH3A1	218	-1.94167	1.04982	1.07264	-2.39372	1.8443	2.67477	69.0013	3.75422	11.5393	-4.6878	1.14189
ALDH3A2	224	-1.63033	-1.43789	-1.40031	-1.43621	-1.72982	-1.62256	1.24679	-1.00646	-1.11471	-1.37924	1.19087
ALDH3B1	221	1.31228	1.38555	1.41221	-2.29577	1.55762	2.07902	2.56017	-1.72746	-9.49393	1.63349	5.58852
ALDH3B2	222	1.26204	11.2552	10.7375	-1.18396	-13.2154	4.32988	26.8208	6.71313	24.3667	-3.22849	15.2412
ALDH4A1	8659	-1.97827	3.60449	3.66465	-1.26573	-4.64916	-3.71823	-1.42564	1.24352	2.09035	1.00491	-1.43921
ALDH5A1	7915	-1.27747	1.30428	1.2915	-1.31715	-2.23546	-1.78878	-1.15313	1.10999	-1.11294	2.2402	1.0338
ALDH6A1	4329	-2.01586	-1.83691	-1.78939	-2.08058	-9.56909	-7.99091	-2.48541	1.08913	-1.70098	-1.4888	-1.8366
ALDH7A1	501	-1.55682	1.10709	1.10341	-1.18818	-1.76649	-2.22251	1.07002	1.2632	-1.10156	1.26255	-1.64415
ALDH8A1	64577	1.04177	1.07839	1.21526	6.76626	-2.00743	-1.57331	-2.58635	-1.18567	7.18676	-1.05258	-2.03736
ALDH9A1	223	-1.31462	-1.18618	-1.17301	-1.81267	-1.79889	-2.11798	-1.21262	-1.07488	-1.01347	-1.07086	-1.44264
ALDOA	226	1.95408	-1.01714	-1.01391	-1.06482	1.95798	1.88428	3.56602	2.48418	2.67172	1.15152	1.05355
ALDOB	229	-1.07935	-7.53631	-9.02743	-1.07384	-27.6782	-119.488	-1.96382	6.14959	1.17551	-19.6049	1.60609
ALDOC	230	-4.09817	1.60146	1.77972	2.05906	4.54927	-1.17163	1.27872	1.88262	3.39935	-1.90264	-1.33635
ALG10B	144245	-1.08985	1.33491	1.29749	1.61675	-1.21889	1.02924	1.33149	1.29665	1.44123	2.31759	-1.2811
ALG10	84920	1.09876	1.59811	1.63122	2.00234	-1.14376	-1.0279	1.5938	1.78084	2.65135	2.6056	-1.30775
ALG11	440138	1.89336	2.25791	2.20343	2.57789	1.22011	1.61755	2.66758	1.40872	1.11906	3.27461	-1.33495
ALG12	79087	1.23856	-1.22434	-1.25171	1.51705	1.01417	1.04928	2.15002	1.25142	1.24982	1.36546	-1.36853
ALG13	79868	-1.0723	1.09823	1.11968	1.26282	1.12976	-1.00297	1.93799	1.2323	1.0788	1.45827	-1.27096
ALG14	199857	1.05124	-1.14783	-1.13241	1.07286	-1.09514	-1.23758	1.60971	1.22714	-1.00601	1.2899	-1.07382
ALG1L2	644974	2.37501	2.62949	2.6327	4.97183	1.73011	1.08341	2.48808	9.76177	2.92977	3.86702	1.05874
ALG1L	200810	6.45524	3.32276	2.94506	4.80124	-2.0729	1.22016	18.4563	13.1613	22.6913	4.02331	-1.19307
ALG1	56052	1.82845	1.4136	1.41946	1.69286	-1.01031	1.23037	1.99657	1.61787	1.0445	1.74728	-1.00793
ALG2	85365	1.07206	1.20233	1.18022	1.51039	-1.18396	-1.18244	1.35589	-1.0118	-1.18534	1.59771	-1.1877
ALG3	10195	2.0501	1.91421	1.87231	2.93146	1.15349	1.6891	2.36348	2.34506	4.67059	2.81692	1.08681
ALG5	29880	1.08204	1.60465	1.63468	1.2965	-1.04129	-1.01584	1.49197	1.12627	-1.19192	1.85561	-1.1327
ALG6	29929	1.52288	1.16969	1.18522	1.37603	-1.01535	-1.02012	2.28076	1.79505	1.97258	2.43445	-1.23669
ALG8	79053	1.83004	1.76281	1.73967	1.71268	-1.04853	1.10204	1.96007	2.0622	1.71722	2.90528	1.00819
ALG9	79796	-1.32866	1.22255	1.23158	1.05799	1.01428	-1.05092	1.77375	1.20859	-1.00911	1.33272	-1.10524
ALKBH1	8846	1.12297	1.09151	1.08708	1.74778	1.02263	-1.0903	1.31716	1.18955	1.20152	1.49249	-1.03848
ALKBH2	121642	1.18913	2.42058	2.53973	1.54043	1.47846	1.22052	2.46408	1.79115	2.48006	2.00536	-1.0913
ALKBH3	221120	-1.2233	1.29931	1.2946	1.38484	1.02551	-1.09924	1.36099	-1.02532	1.19099	1.16327	-1.05697
ALKBH4	54784	1.26296	1.19468	1.16393	1.60448	1.02636	1.21636	2.12256	1.53351	1.76176	1.5597	1.06793
ALKBH5	54890	-1.02121	-1.29131	-1.23825	1.20168	1.08178	-1.24065	1.28693	-1.04489	1.10417	1.15477	-1.18571
ALKBH6	84964	1.91861	1.43431	1.41249	2.31822	1.52557	1.82601	2.82488	1.63	2.00802	1.42156	-1.0147
ALKBH7	84266	1.38601	-1.52634	-1.52941	-1.27083	-1.09078	1.05773	1.18759	-1.10686	1.06231	-1.32454	-1.20529
ALKBH8	91801	-1.24511	1.28385	1.30172	1.27201	-1.26822	-1.45961	1.34064	1.04107	-1.12438	1.90608	-1.29985
ALK	238	-2.07599	-6.54636	-8.18945	2.6812	4.17674	14.9518	1.53098	2.04518	1.76253	-2.62796	34.1864
ALLC	55821	-2.16729	2.1572	1.59521	-1.18495	1.12499	-2.39512	-1.1179	4.50054	4.73853	5.10578	-1.73848
ALMS1P	200420	1.13443	1.06124	1.04084	1.99956	2.13131	-1.87656	-1.08794	-1.50554	1.20133	4.30405	-2.1545
ALMS1	7840	1.09633	1.30722	1.32133	1.86699	-1.1801	-1.06274	2.41809	-1.05898	1.42759	1.99646	-1.3696
ALOX12B	242	1.88825	-1.0062	-1.05762	-1.25149	4.60076	2.06569	2.06569	7.39734	42.0731	-1.29439	5.35409
ALOX12P2	245	-1.04142	14.5345	14.7398	5.08965	-1.70764	1.0311	1.82216	6.61849	10.2738	5.0196	1.42068
ALOX12	239	1.47866	-1.58499	-1.57228	-3.59647	1.24076	1.5924	2.34417	1.31166	13.7071	-18.3341	-1.10858
ALOX15B	247	-3.09187	1.77479	1.55082	-1.74313	21.9163	71.1454	14.1851	-1.59204	-7.62891	-3.49117	8.31398
ALOX15	246	-1.55405	1.60317	1.49363	-4.54857	1.07585	1.02041	5.50173	-3.90301	-1.36732	13.156	-2.02204
ALOX5AP	241	1.18056	-1.10679	-1.09181	1.27601	2.09382	2.92085	1.38104	-3.51375	-7.1332	1.52808	1.67099
ALOX5	240	-1.03403	1.33866	1.33699	1.17199	3.80296	5.56441	2.1492	-3.37138	-6.70352	1.99156	7.34474
ALOXE3	59344	2.14508	10.2652	12.5447	1.49528	1.33535	3.6059	3.03458	7.78773	28.9971	2.1203	1.26551
ALPI	248	128.312	-22.0153	-23.3613	74.397	6.25168	-1.30253	877.616	345.576	438.9	-12.6375	3.55233
ALPK1	80216	-1.40605	1.08277	1.03985	1.14613	1.2973	1.36864	1.49762	-1.05234	-1.3517	2.0601	-1.10221
ALPK2	115701	-1.1397	1.56792	1.60497	-1.84338	3.45881	1.45825	1.36948	4.63558	7.44589	1.90479	-2.64216
ALPK3	57538	-5.3269	3.08199	3.4973	-4.08314	1.30669	1.22505	7.32513	1.44173	-3.63939	-1.21551	-1.00011
ALPL	249	-2.5995	-1.01623	-1.05642	1.01043	1.38316	-4.84762	-1.91513	-2.18602	-5.42106	2.14192	2.92637
ALPPL2	251	4.45314	2.89678	2.62928	32.2004	6.28104	28.487	19.138	2.34505	-2.8418	224.533	9.01664
ALPP	250	17.5562	3.67443	3.25059	131.671	3.29788	11.8199	13.6412	-2.28075	-2.70092	703.054	51.987
ALS2CL	259173	-2.10996	1.52001	1.468	-1.48515	-4.51474	-1.7044	4.21126	-1.71873	-2.02731	1.23381	1.40655
ALS2CR11	151254	-1.95406	-1.29149	-1.1859	3.62004	1.93685	1.71599	4.63458	5.50355	3.13238	2.23816	1.26282
ALS2CR12	130540	-1.33148	-1.05396	-1.06509	-4.4029	-3.29333	-1.22933	2.4905	-3.2938	-7.90998	1.35636	-1.7726
ALS2CR8	79800	-1.71093	1.10706	1.16223	-1.1571	-1.3398	-1.09477	1.58557	-1.01984	-1.23237	1.00601	-1.2565
ALS2	57679	-1.14282	1.71466	1.78419	1.4581	-1.2703	-1.13993	1.27945	1.04899	1.09636	1.93018	-1.30084
ALX1	8092	-1.46601	9.23864	8.3782	3.60913	-10.4184	-4.69034	394.057	12.8679	37.1822	13.0962	-1.9355
ALX3	257	-1.16143	1.18007	1.12484	1.5811	-1.10262	-1.12798	9.62467	1.67779	2.63679	1.78017	-1.18002
ALX4	60529	-5.65351	-1.1893	-1.12999	1.50501	-1.81776	-3.47611	33.0894	2.56444	9.46222	2.63848	-1.79074
AMACR	23600	1.48213	1.08762	1.00299	1.11643	-1.07562	4.15134	1.94898	1.83312	1.62702	2.17165	1.18379
AMBN	258	3.38492	26.0345	35.4759	12.7564	-1.39167	1.71056	inf	14.3889	73.4594	5.73511	-1.72779
AMBP	259	1.95065	5.13767	5.31173	1.17656	-1.10663	1.57555	-1.42203	15.6207	4.11329	4.67592	-3.05189
AMBRA1	55626	1.01399	-1.06501	-1.12575	1.23351	-1.22501	-1.11378	1.96191	1.06354	-1.09806	1.59277	1.05617
AMD1	262	-1.04742	1.13932	1.16337	1.03442	-1.06398	-1.92945	1.28193	-1.27347	1.06955	1.53524	-1.77834
AMDHD1	144193	1.56009	1.67395	1.54364	7.44751	-1.57202	-2.34555	-1.81779	1.85636	1.6474	3.56068	-1.27115
AMDHD2	51005	1.69393	1.03718	1.00927	1.57792	1.58958	1.51342	2.2014	1.27708	1.0047	1.47912	1.08212
AMELX	265	33.3201	68.718	52.0707	1.57883	7.61475	1.19621	3.9936	11.1125	64.0039	33.8689	-3.92317
AMELY	266	-25.8363	2.76085	3.00643	-2.89837	-20.4936	-22.3677	6.55424	5.8484	4.59913	1.50694	-2.85313
AMFR	267	1.20231	-1.07159	-1.07545	1.05882	-2.97763	-2.76189	1.21007	-1.05099	1.07224	-1.04439	1.27022
AMHR2	269	1.33292	-3.68034	-3.66621	-2.69614	1.4733	2.27576	-4.00456	1.11348	-4.71307	4.0916	2.16377
AMH	268	6.26064	11.7985	12.3627	7.62579	5.86811	8.03705	9.49093	3.65777	7.45114	14.1667	2.01196
AMICA1	120425	-1.11991	-3.0289	-3.13668	2.04656	2.86078	2.46172	1.95297	-3.39877	-5.96403	-1.07295	-1.02772
AMIGO1	57463	-1.7572	-1.2346	-1.19106	-2.02123	-1.26055	-2.14757	1.44233	-2.00591	-2.32907	-1.2516	-1.2684
AMIGO2	347902	-2.04486	1.14286	1.45062	6.50974	-1.77894	-1.99771	1.36161	1.64594	-1.38556	2.18735	5.06076
AMIGO3	386724	2.00637	1.33474	1.33167	1.22463	1.32575	2.22266	6.87851	1.44836	1.15192	2.07795	-1.28469
AMMECR1L	83607	-1.11824	1.44736	1.41772	1.73223	-1.0588	-1.07245	1.76239	1.20355	1.27845	1.70228	-1.26831
AMMECR1	9949	1.90467	2.02872	1.99468	1.64511	-1.31714	1.3838	1.8703	1.66772	2.7631	2.31111	1.11114
AMN1	196394	1.15966	1.13993	1.26473	1.26927	-1.59769	-1.7547	2.23741	1.09448	1.35661	1.25882	1.07287
AMN	81693	1.13888	-5.31363	-5.70318	1.38114	-1.08238	1.13135	-1.61368	5.8083	3.17616	-1.30573	-3.06934
AMOTL1	154810	-2.85786	-3.18339	-2.73789	1.12775	1.2713	1.29827	1.87105	-3.31806	-1.58815	-1.84336	-1.39271
AMOTL2	51421	-2.85097	1.97704	2.08738	-1.15605	-1.23977	-1.08633	-1.20024	-1.75976	-2.24998	1.33846	-1.72753
AMOT	154796	-1.59024	1.86893	1.85137	-5.59525	-1.46044	-1.07384	1.55154	1.48692	1.22805	2.4046	1.88497
AMPD1	270	-18.2875	-22.2007	-24.1588	-14.6312	1.28629	1.05818	-3.0591	1.73564	-2.14999	-6.07758	-1.33004
AMPD2	271	1.15632	2.27647	2.25327	1.85852	1.08399	-1.21124	1.7778	1.59288	1.3951	1.91114	1.03956
AMPD3	272	1.16353	1.33637	1.32596	1.45048	1.05569	-1.24859	2.31751	1.762	1.38182	1.63478	1.00874
AMPH	273	1.12543	-1.49431	-1.26252	1.61669	-12.2789	-6.76357	1.9017	3.19669	2.25365	-1.4057	-1.4007
AMTN	401138	21.508	3.64409	3.31686	20.7817	1.31069	-2.71133	28.1565	1.76059	772.782	-5.79448	11.6234
AMT	275	-2.29668	-2.09755	-2.29005	-1.28278	-2.53914	-1.64256	-1.00563	1.15879	-1.52347	-1.44073	-1.09943
AMY1A	276	2.33302	1.37948	1.30677	-633.885	3.67596	2.76363	2.56904	2.51833	-3.36643	2.08977	2.05168
AMY2A	279	3.96289	3.88432	4.12509	-198.233	-1.56288	1.52249	3.00566	2.35896	-3.05224	1.51549	2.06153
AMY2B	280	-2.47184	1.5182	1.36146	-9.23003	3.36863	2.0091	2.44713	1.50114	-1.98427	2.13972	1.17933
AMZ1	155185	6.50647	2.03228	2.24893	7.98754	16.8104	3.23768	1.19379	-1.38862	-1.87057	2.61396	-1.22966
AMZ2P1	201283	-1.03071	1.1727	1.28997	1.12404	1.24387	1.26742	2.07234	1.01299	1.2249	-1.08066	-1.49615
AMZ2	51321	1.40818	1.58026	1.64222	1.68798	1.1165	1.40662	1.96617	1.59596	2.00542	1.28378	-1.14827
ANAPC10	10393	-1.16505	1.55453	1.66867	1.58452	-1.19086	-1.22585	1.38657	-1.05054	-1.03993	1.42293	-1.18901
ANAPC11	51529	2.11962	1.38297	1.41651	1.60732	-1.0386	1.44075	2.48387	1.90877	1.98268	1.42639	1.12285
ANAPC13	25847	1.05976	1.49284	1.52946	1.60601	-2.07407	-1.36483	1.38824	1.03752	1.21689	1.46022	-1.35976
ANAPC16	119504	-1.27555	-1.09733	-1.05187	-1.08324	-1.36101	-1.24747	1.28127	-1.2643	-1.29754	-1.06897	-1.29912
ANAPC1	64682	-1.15256	1.90197	1.92416	1.55298	-1.20403	-1.15975	2.19325	1.62564	1.93018	2.53715	-1.27216
ANAPC2	29882	1.15766	1.09676	1.07946	1.38502	1.12192	-1.12288	1.81297	1.06205	1.03227	1.52778	-1.20286
ANAPC4	29945	-1.3664	1.27736	1.29326	1.4989	1.14391	1.32959	2.44632	1.14992	-1.03	1.58895	-1.1964
ANAPC5	51433	1.05777	1.34835	1.36815	1.4514	1.01866	-1.08373	1.88486	1.332	1.61259	1.82128	-1.0742
ANAPC7	51434	1.38	1.93042	1.95143	1.27808	-1.11555	1.33373	2.91079	1.45732	2.14348	1.69637	-1.03214
ANGEL1	23357	-1.17867	1.79564	1.77446	1.87371	-1.29356	-1.32749	1.91347	1.04169	1.00067	1.7906	-1.04583
ANGEL2	90806	1.25048	1.33667	1.31989	1.3586	-1.00336	-1.14591	2.21325	1.19007	1.13734	1.69476	-1.19259
ANGPT1	284	-7.02739	-2.5267	-2.0698	-1.68551	-1.57182	-7.56803	3.1085	-4.76635	-6.91323	-2.17082	-1.091
ANGPT2	285	-1.36432	3.28115	3.15268	3.16401	7.97668	1.01795	3.57887	1.2302	-1.89043	5.55021	1.67852
ANGPT4	51378	-14.8626	-1.2808	-1.31457	-2.2217	1.64239	-2.17811	1.97338	-22.4625	-40.3713	-1.1527	-1.95916
ANGPTL1	9068	-9.60698	-14.1379	-11.1572	-9.08467	-7.39515	-8.27823	-1.29495	-6.22755	-11.6934	-5.58301	-3.86452
ANGPTL2	23452	-3.68231	1.08985	1.18378	1.37959	2.49673	1.00997	1.4356	1.23518	-1.23254	-1.10319	1.43162
ANGPTL3	27329	-3.60514	1.72429	1.52199	1.31893	-3.77636	-14.2237	-1.51227	21.5344	5.77601	-1.82956	1.30288
ANGPTL4	51129	-4.07273	1.03368	1.06056	1.43969	29.4867	3.09062	-1.09233	2.98341	1.05145	-1.61211	2.4081
ANGPTL5	253935	-22.5861	-14.4413	-13.5351	-12.0587	-1.16577	-2.00829	7.14653	-6.36944	-18.4353	-3.44443	-4.76138
ANGPTL6	83854	2.97864	-2.09312	-1.97925	2.78231	-3.05511	-2.63395	-5.78653	1.30141	-1.22624	-3.3957	-1.19635
ANGPTL7	10218	-23.0299	-31.9009	-23.1289	-7.54794	-2.8566	2.55393	30.1519	-21.057	-18.5047	-6.33799	-1.77912
ANG	283	-1.6292	-1.28851	-1.18094	-1.78594	2.9464	1.6324	-1.55877	-1.17971	-3.5787	-1.32422	1.08042
ANK1	286	1.73982	1.97679	2.31648	-4.14096	5.26586	7.10329	5.19427	2.95478	2.96207	5.6126	-1.93509
ANK2	287	-5.13512	-7.78484	-6.6809	-4.95656	-4.51439	-8.5356	1.64538	-1.50656	-3.85135	-3.2524	-5.39217
ANK3	288	-1.02968	-2.88864	-2.97533	-1.46845	-2.7197	-1.66975	-1.19045	-1.89434	-1.84093	-1.14724	-2.04247
ANKAR	150709	-2.18321	1.09952	1.15536	1.08333	1.86669	1.10106	3.13565	-1.09162	-1.3511	1.24667	-1.44551
ANKDD1A	348094	-3.18962	-1.30695	-1.29478	1.01804	1.71686	1.15117	2.57349	-1.42655	-1.44293	-1.11517	-2.07032
ANKFN1	162282	-1.17005	2.71087	3.32703	-2.3252	-1.10426	-1.02568	1587.05	-1.06646	-3.24402	3.40507	-1.56861
ANKFY1	51479	-1.41136	-1.38842	-1.36655	1.4686	-1.44534	1.09928	1.08817	-1.34301	-1.60582	1.36408	1.3192
ANKHD1-EIF4EBP3	404734	-1.05195	-1.14225	-1.14492	-1.35507	-1.06757	-1.10953	1.83276	-1.15525	-1.88507	1.22851	1.0789
ANKHD1	54882	-1.08445	1.25885	1.22621	1.20723	1.24318	-1.26927	1.6337	1.13621	-1.0399	1.57156	-1.39387
ANKH	56172	-1.09766	1.28352	1.19176	1.34272	1.01938	-1.74729	1.34372	1.30693	1.929	2.12441	1.52999
ANKIB1	54467	1.09517	1.30064	1.31123	1.67671	-1.02552	1.27345	1.86133	1.53896	1.56597	2.63869	-1.40399
ANKK1	255239	-2.82715	2.60258	2.39455	1.54466	4.67278	2.4044	2.20595	1.34427	2.77453	2.12804	-3.54049
ANKLE1	126549	1.46354	2.01188	2.23612	5.76461	4.27162	2.62506	5.09843	3.32056	4.33453	3.14255	-1.71881
ANKLE2	23141	1.02408	1.51576	1.51651	1.90551	1.27725	1.15692	1.88353	1.3243	1.40311	2.06338	1.3358
ANKMY1	51281	1.16586	1.67824	1.68488	-1.27879	1.3833	1.1905	2.23388	-1.1288	-1.64385	1.81262	-1.04824
ANKMY2	57037	-1.64031	-1.26029	-1.25306	1.07738	-1.1693	1.10306	1.92566	1.09089	1.07523	1.51653	-1.23134
ANKRA2	57763	-1.07646	1.13348	1.18292	1.1104	1.20892	1.04639	1.55848	1.47413	1.29785	1.26601	-1.1237
ANKRD10	55608	1.05158	1.74813	1.69425	1.36394	1.52399	1.4942	1.87503	1.3054	-1.09882	2.17476	1.04351
ANKRD11	29123	-1.33315	1.232	1.22348	1.30615	1.05339	1.16371	1.89827	-1.1248	1.03825	1.56948	-1.19343
ANKRD12	23253	-1.39847	-1.51681	-1.49512	1.14381	-1.09056	-1.44947	1.30436	-1.25376	-1.46374	1.11995	-1.67413
ANKRD13A	88455	-1.32143	-1.75407	-1.76435	1.03864	1.48433	1.26133	1.83774	-1.15847	-1.63202	1.18	-1.22158
ANKRD13B	124930	1.7514	5.22422	5.33704	2.70065	2.57543	4.52564	6.80553	2.87939	5.23865	3.24474	1.20029
ANKRD13C	81573	-1.08363	-1.15087	-1.12139	1.2287	-1.19767	-1.256	1.48914	1.12762	-1.11744	1.4255	-1.25129
ANKRD13D	338692	1.81965	1.88286	1.87409	1.88597	1.66547	1.5046	2.93909	1.64753	1.56579	1.77925	1.50915
ANKRD16	54522	1.21781	1.71752	1.70056	1.25539	1.24046	-1.05779	2.21562	1.56278	1.95638	1.44251	-1.15583
ANKRD17	26057	-1.14712	1.15039	1.14961	1.22895	-1.50127	-1.58888	1.38529	1.10922	1.1384	1.69089	-1.29309
ANKRD1	27063	-2.1983	6.71393	6.83679	-2.79679	1.39576	2.09752	1.67463	-20.5432	-48.3292	46.3388	2.76391
ANKRD20A3	441425	-2.0494	-2.54683	-2.47548	-2.91871	1.51768	1.21855	1.55686	-2.86111	1.05391	1.51657	-3.39642
ANKRD20A4	728747	-1.73298	-2.64538	-2.54423	-3.08467	2.38458	-1.19357	3.01875	-1.13096	1.39513	2.06025	-3.48967
ANKRD22	118932	3.96449	1.89444	1.93044	-1.59771	-1.06058	-1.92721	3.08175	7.29741	5.4634	1.31645	2.00681
ANKRD23	200539	-5.48681	2.56141	2.59406	-6.73573	2.69234	1.79187	3.7681	2.91883	3.03383	2.08619	-1.13975
ANKRD24	170961	1.14953	1.1609	1.00228	-1.07411	1.25208	1.50823	1.0661	1.64631	-1.66384	1.26588	-1.44072
ANKRD26P1	124149	1.02511	5.2597	5.41701	2.75513	3.15613	4.10346	84.0382	5.07086	12.1454	9.17951	-1.55968
ANKRD26	22852	1.08104	1.49041	1.49696	1.18027	-1.06719	-1.00808	2.11377	1.24328	1.33434	1.81386	-1.41429
ANKRD27	84079	1.07135	1.33522	1.30478	1.69261	-1.28885	-1.29842	3.34319	-1.05355	1.3088	1.5852	-1.64616
ANKRD28	23243	1.00074	1.04409	1.02823	-1.06185	-1.84567	-1.06864	1.29712	-1.09616	-1.66652	1.92819	-1.1909
ANKRD29	147463	-4.56104	-1.06544	1.094	2.47691	1.85041	2.56992	4.80241	-4.67965	-4.80846	-1.27759	-2.74321
ANKRD2	26287	-9.03528	1.63323	2.10589	-4.86506	-11.8772	-1.27046	7.50649	-1.17248	4.9616	2.45691	-1.09021
ANKRD30A	91074	1.50096	inf	inf	4.50153	-1.38477	-1.79441	12.7028	inf	9.17297	14.035	-7.33882
ANKRD30B	374860	4.5726	2.80461	3.28632	3.19932	3.57979	2.12306	-1.97061	3.90352	2.67515	9.55295	11.5346
ANKRD31	256006	-1.44829	3.39251	3.33567	-2.52998	-1.07952	-1.17778	2.44221	1.94084	1.59582	-5.585	-2.23941
ANKRD32	84250	1.29427	1.40222	1.44255	1.93027	1.5564	1.06634	2.4346	2.02849	1.70507	2.48326	-1.18842
ANKRD33	341405	-1.34056	9.73855	8.60045	4.26275	9.69407	5.31584	67.4977	5.73109	4.50271	24.0857	3.32302
ANKRD34A	284615	1.21165	-1.12106	-1.04209	1.00661	1.50699	1.33904	3.51916	3.24052	1.49529	-1.53715	-1.08571
ANKRD34B	340120	3.58698	2.92706	2.1187	11.9992	-18.2652	-1.00072	20.8655	40.2252	12.9644	5.638	-1.5457
ANKRD34C	390616	-1.73968	-1.23725	-1.00926	1.96181	-2.21816	-3.98562	17.214	-5.72981	1.65449	1.33344	-2.40723
ANKRD35	148741	-2.71857	-3.61073	-3.33165	-2.89362	-1.38027	-2.74285	1.55321	1.05072	1.36654	-4.64694	-2.49331
ANKRD36BP1	84832	-1.13703	-1.17553	-1.11509	1.19188	-1.03473	-1.30086	1.90743	1.316	1.09357	2.03236	-1.57613
ANKRD36B	57730	-1.52857	2.54436	2.6198	1.99008	2.82124	1.37038	4.65119	2.04308	1.73206	2.78318	-1.26097
ANKRD36	375248	-1.49986	2.25155	2.294	2.67543	3.29128	1.64227	3.23221	1.5373	1.52287	2.17433	-1.18688
ANKRD37	353322	-1.24593	1.58712	1.73598	-1.56128	2.62888	1.386	-1.09783	-1.28476	-1.29016	-1.51191	-3.15432
ANKRD39	51239	1.67665	1.6404	1.70934	2.40253	1.86543	1.43754	2.50923	1.904	1.99767	1.47127	1.20678
ANKRD40	91369	-1.69708	-1.05396	-1.01523	1.24085	-1.01025	1.01688	1.66629	-1.36025	-1.35971	1.08556	-1.13588
ANKRD42	338699	1.23126	1.26408	1.26946	1.00533	-1.33711	1.08511	1.31667	-1.11341	-1.51197	1.7366	-1.23539
ANKRD44	91526	-1.24207	-2.0376	-1.89238	1.31591	1.31261	-1.01209	1.21306	-1.90881	-3.64775	1.23148	-1.90942
ANKRD45	339416	-1.25661	-1.21282	-1.29615	-2.6097	-2.80573	1.37007	5.91106	-1.07915	-2.25826	3.92349	-1.45848
ANKRD46	157567	-1.22099	1.45687	1.4914	1.17651	-2.00797	-2.92596	1.02574	-1.21347	-1.0662	1.39109	-1.72439
ANKRD49	54851	-1.0786	1.31986	1.32437	1.64945	1.16558	1.12447	2.1016	1.43652	1.59949	2.02508	-1.31421
ANKRD50	57182	1.57548	1.15039	1.21735	1.86478	-1.00652	-1.21242	1.5185	-1.13675	-1.11939	1.68809	-1.20296
ANKRD52	283373	1.15214	1.14101	1.1365	1.61991	-1.49791	1.12409	4.81281	1.49985	1.58533	1.93329	-1.28809
ANKRD53	79998	-8.25333	-3.51564	-3.15361	-2.05097	1.86247	1.56617	1.52156	-1.24563	-1.56629	-2.85572	-2.19488
ANKRD54	129138	1.34154	1.01252	1.00678	1.51426	-1.1848	-1.03287	2.25529	1.12358	1.26182	1.35022	-1.12054
ANKRD55	79722	1.55521	-1.65977	-1.65347	-1.15578	-1.26593	-2.61413	-6.55647	1.48664	-2.50254	1.78307	-2.42817
ANKRD5	63926	1.58245	1.91722	1.83826	1.77461	-1.4085	1.1428	1.8479	1.5973	2.10962	2.88601	-1.61307
ANKRD6	22881	-1.63526	-1.50978	-1.40183	-1.46424	-1.07389	-1.40448	1.63902	-1.40928	-1.24704	1.01818	1.12972
ANKRD7	56311	1.89686	-2.54492	-2.22807	1.55693	-1.93777	1.53209	18.4273	5.47684	8.09342	-1.59614	-1.396
ANKRD9	122416	1.27049	-1.7407	-1.83061	1.60204	-1.85411	-1.13317	2.17377	1.76177	1.88619	-1.45466	-1.58381
ANKS1A	23294	-1.33452	-1.09604	-1.09631	1.527	-1.20818	-1.6016	1.23205	-1.9664	-2.09812	1.00814	-1.49921
ANKS1B	56899	1.40432	-10.8725	-8.99347	-4.70486	1.20753	1.07379	14.0941	-1.33513	-2.01737	-3.61274	-4.57407
ANKS3	124401	1.45708	1.76393	1.70555	1.63916	1.44755	1.96346	3.5965	1.62202	1.23276	1.6587	-1.17711
ANKS4B	257629	1.38838	-1.48159	-1.55354	2.07858	-1.46105	-2.72885	-1.31606	103.551	16.4256	1.43513	1.0806
ANKS6	203286	-1.3547	2.20556	2.19354	1.50472	-1.39739	-1.10024	4.89399	1.08631	-1.02268	2.21717	1.38597
ANKZF1	55139	-1.01884	2.19839	2.11759	1.75486	2.35589	1.62772	2.83015	1.88337	1.78965	2.04361	1.00305
ANLN	54443	10.186	5.04645	5.20134	3.64541	3.81276	6.48751	29.1429	17.6476	19.9744	6.72766	1.89142
ANO10	55129	-1.096	-1.9716	-2.10666	-1.4314	-1.86076	-1.10688	2.79751	1.00803	-1.41615	-1.31138	-1.21095
ANO1	55107	-1.76139	2.51594	2.73994	6.45512	3.40214	-1.70043	-1.38113	1.04001	2.28053	2.35452	-1.01656
ANO2	57101	-1.0748	-1.71531	-1.67771	-1.021	1.59129	-3.44713	17.8917	-5.44625	-3.85375	1.24366	1.11621
ANO3	63982	-3.20743	-3.01751	-3.73294	2.87264	1.32761	-3.49408	2.07013	2.17889	-1.96622	8.61802	-1.74267
ANO4	121601	-1.65522	-1.55215	-1.43231	2.25013	15.7629	15.427	12.3391	1.38193	1.22446	-1.6425	-2.44833
ANO5	203859	-1.47161	-8.5726	-8.44522	-8.54472	-4.98662	-1.74055	1.38304	-1.84202	-4.57694	-2.21565	-3.00284
ANO6	196527	-2.90978	1.4913	1.68571	1.589	1.18304	-1.35617	1.41042	-1.8939	-2.08141	1.00935	1.66824
ANO7	50636	3.02598	-1.97806	-1.8914	2.09062	2.01075	1.47746	1.88356	3.9986	2.50524	-1.72281	1.74358
ANO8	57719	1.19305	1.72621	1.75121	-1.48318	1.19239	1.23672	2.49317	1.78857	1.05008	1.28767	1.26006
ANO9	338440	2.62666	1.816	1.68545	1.52963	2.61692	2.31196	6.53392	3.05751	1.82826	2.04344	-1.02344
ANP32A	8125	1.27802	1.28412	1.28971	1.69423	-1.17125	-1.14737	1.85793	1.06936	1.29643	1.69186	1.01683
ANP32B	10541	1.1138	1.69861	1.72608	2.02864	1.1585	-1.0322	1.63471	1.18385	1.62172	1.76618	-1.04868
ANP32C	23520	1.61056	1.52521	1.4929	1.89407	-1.17525	-1.09645	2.10914	-1.11795	1.69136	1.54277	-1.09499
ANP32D	23519	-1.22133	-1.03245	-1.02809	1.90256	1.2522	-1.20799	1.15409	1.10053	1.53864	inf	-1.01461
ANP32E	81611	1.7539	1.76566	1.87429	2.2693	-1.27956	-1.43965	2.08466	2.35397	1.94929	2.91399	1.05546
ANPEP	290	-1.56946	-12.8505	-12.4429	1.14447	-1.24635	-1.04262	1.04973	-1.09021	-3.44066	-4.09086	1.82374
ANTXR1	84168	1.11872	2.0913	2.17009	2.00541	1.62035	1.78721	2.09952	-1.09553	-1.18351	2.12049	-2.12323
ANTXR2	118429	-3.58084	-1.96318	-1.7762	2.53915	1.05255	-1.92148	-1.48953	1.05842	-2.11594	-2.0749	-1.46327
ANTXRL	195977	-1.08058	-1.16848	1.50511	-1.11051	1.43664	12.2528	2.62331	4.84535	2.81862	5.24164	1.27115
ANXA10	11199	1.47282	91.0901	105.367	16.3084	-6.47793	28.1631	-2.49474	604.838	114.501	-1.78276	-3.52773
ANXA11	311	-1.33504	-1.26932	-1.2784	-1.46621	-1.86135	-1.01322	2.05706	-1.04263	-1.63523	1.27191	1.17174
ANXA13	312	-1.03654	1.14655	1.1763	10.5239	3.37134	5.81571	4.02125	5.35192	5.02815	2.0403	2.16526
ANXA1	301	-4.98463	1.28686	1.49211	-3.19005	2.2192	4.43798	1.76106	-1.20325	1.19277	-5.87441	2.50085
ANXA2P1	303	-1.1751	1.23643	1.25959	1.21343	1.4152	2.5638	3.79067	-1.44382	1.03045	3.02925	1.4648
ANXA2P2	304	-1.19839	1.27341	1.33137	1.23964	1.34258	2.05325	3.43027	-1.25859	1.10839	1.79921	1.61611
ANXA2P3	305	-1.03168	1.45912	1.53676	1.06092	1.5812	2.28682	4.02159	-1.7584	1.36442	10.0375	1.56614
ANXA2	302	-1.17948	1.29683	1.34577	1.32525	1.53963	2.39587	3.60678	-1.20538	1.08292	1.74373	1.68289
ANXA3	306	-2.51982	3.16851	3.22069	-1.12321	-4.69901	-1.05789	1.64066	-3.58379	-5.24016	1.33908	-1.37503
ANXA4	307	1.00537	1.21451	1.17243	1.58127	3.35096	2.0898	1.87318	-1.18166	-1.50905	2.34139	1.00465
ANXA5	308	-1.65335	1.34736	1.42737	2.06797	1.25531	1.26215	2.14483	-1.2649	-1.9439	1.869	1.26021
ANXA6	309	-1.46361	-1.11482	-1.09257	-1.37451	1.16369	-1.61084	1.18398	-1.49251	-2.51901	-1.43673	-1.44177
ANXA7	310	-1.01378	-1.06251	-1.03006	1.24463	-1.59611	-1.06508	1.41193	1.10733	1.10082	1.3436	-1.02496
ANXA8L1	728113	1.27439	2.76478	3.15059	1.45789	2.43253	3.8935	4.86565	-1.76913	5.91406	-7.38599	-1.05593
ANXA8L2	244	-2.11951	3.25638	4.07745	1.46041	3.17377	23.4965	2.34938	-5.14795	1.61837	-3.07648	13.6435
ANXA8	653145	-1.74009	12.3009	16.7869	1.45039	2.44836	23.2797	1.50349	-3.16828	3.43705	-3.34975	15.9827
ANXA9	8416	4.89326	4.29793	4.14305	-4.90322	-6.34944	-3.9482	2.06689	2.4206	1.1023	1.76766	-1.23684
AOAH	313	1.15175	1.17041	1.07513	2.27164	4.35318	1.91685	-1.07598	-1.49188	-1.01274	1.65015	-1.95003
AOC2	314	-6.08144	1.82876	1.99833	1.75522	1.34038	1.18714	2.35547	-1.41902	-1.31221	2.14565	-1.35475
AOC3	8639	-15.8555	-4.7289	-4.4245	-2.40441	-1.30591	-5.79174	1.0108	-5.67937	-12.0301	-2.64787	-1.13277
AOX1	316	-5.22271	-3.1639	-3.36124	-4.21837	-2.86474	-3.20538	-1.80674	-2.09778	-8.31676	-1.77547	-7.85151
AOX2P	344454	1.5977	3.79726	4.56744	3.81089	3.21713	5.5026	1.46802	10.4867	-1.00332	inf	-5.97297
AP1AR	55435	1.38811	1.06346	1.03124	1.26725	-1.15365	-1.38321	1.14062	1.18364	1.33913	2.07699	-1.23173
AP1B1	162	1.18866	-1.34634	-1.35894	1.03117	-1.08553	-1.09188	1.67774	1.17482	1.28489	1.21688	-1.04706
AP1G1	164	-1.02356	-1.13419	-1.13765	1.17026	-1.6057	-1.17571	1.17148	1.01692	-1.06639	1.51522	-1.17697
AP1G2	8906	1.54133	1.41795	1.3807	1.40253	1.88474	2.09942	2.61707	2.18871	1.59725	1.91518	1.08421
AP1M1	8907	-1.05248	1.08808	1.09959	1.81386	1.1316	1.02933	1.76512	-1.21978	-1.25246	1.09854	1.05898
AP1M2	10053	2.67354	1.06541	1.04613	1.16464	-6.97221	-2.65137	13.4108	1.76161	1.28476	1.52539	1.38149
AP1S1	1174	2.15009	1.7595	1.73362	2.08859	-1.08988	1.34584	2.3299	2.30767	2.40485	1.76026	1.57336
AP1S2	8905	-1.34158	-1.82539	-1.67823	-1.49737	1.59249	-1.07372	1.34629	-2.08263	-2.31439	-2.09683	1.02563
AP1S3	130340	1.9939	3.40264	3.6903	1.00036	-1.40337	1.52137	2.39566	1.17075	-1.01217	3.05063	-2.0149
AP2A1	160	1.31839	1.00944	1.0114	1.52991	1.19712	1.00626	1.84189	1.28251	1.37644	1.35233	1.3136
AP2A2	161	-1.09207	-1.21501	-1.24496	1.36812	-1.45532	-1.52284	1.46299	1.00357	-1.5293	1.31912	-1.04452
AP2B1	163	1.30454	1.19089	1.25334	1.73075	-1.61275	1.17238	1.87646	1.14218	-1.18422	2.33755	-1.01319
AP2M1	1173	1.3279	-1.07531	-1.07742	2.48487	1.03153	1.26361	2.02151	1.10534	2.47974	1.22474	1.24558
AP2S1	1175	1.77609	1.20201	1.19445	1.62604	1.2769	1.14195	1.67018	1.26729	1.68255	1.45282	1.16544
AP3B1	8546	1.06455	1.00995	1.00919	1.16373	-1.62757	-1.34078	2.50333	1.0962	-1.03477	1.55542	-1.20432
AP3B2	8120	1.10619	1.09577	1.21686	2.10969	-1.49936	1.81976	9.56564	3.03697	11.8274	1.41944	1.41022
AP3D1	8943	1.24076	1.24676	1.22675	1.35001	-1.22127	-1.17246	2.20606	1.33931	1.26823	1.54821	-1.09046
AP3M1	26985	1.04363	1.144	1.17459	1.26189	-1.35253	-1.24765	1.82342	1.16097	1.11508	1.59991	-1.21054
AP3M2	10947	1.42749	2.2418	2.29038	2.28694	-1.10526	-1.06729	3.3168	1.17859	2.04134	2.6	-1.14681
AP3S1	1176	1.09652	1.15252	1.19366	1.63899	1.85218	1.19927	1.93931	1.36277	1.30149	1.09531	1.09632
AP3S2	10239	-1.07576	-1.92412	-1.99848	1.17683	-1.48422	-1.28107	1.26495	1.07924	1.04037	1.31239	-1.11609
AP4B1	10717	-1.03929	1.16726	1.16994	1.13089	1.04952	-1.16726	2.05224	1.40853	1.0074	1.85911	-1.36621
AP4E1	23431	-1.06712	-1.19742	-1.16995	1.43083	-1.19764	-1.09219	1.7072	-1.08972	1.11175	1.39492	-1.07651
AP4M1	9179	1.53411	1.34849	1.34575	1.62744	1.41093	1.68232	2.9819	1.41617	1.384	1.66975	1.21499
AP4S1	11154	-1.22659	-1.51152	-1.38649	1.7846	-1.49599	-1.29869	1.21597	1.23013	-1.02643	-1.18458	-1.50335
APAF1	317	-1.02415	-1.09931	-1.10425	1.54923	1.23521	1.34308	1.99353	1.05006	-1.43409	2.40696	-1.2154
APBA1	320	-2.54218	-2.30644	-2.33594	1.24971	-1.32857	-1.35952	1.10607	1.52395	1.46545	-1.02789	-1.875
APBA2	321	1.75	1.8868	1.82175	8.47394	2.25904	6.00348	3.10303	4.66306	3.32986	2.21736	-1.43623
APBA3	9546	1.40341	1.19167	1.17317	1.47689	1.51296	-1.05275	1.96946	1.34092	1.41182	1.32186	-1.08944
APBB1IP	54518	-2.50121	-2.17022	-2.15074	1.28162	5.08389	6.47406	1.16915	-1.50509	-2.95033	2.27873	-1.50052
APBB1	322	-1.56498	-2.73178	-2.61233	-2.07468	-1.35003	-1.32568	2.48589	-2.37638	-3.64506	-1.96902	-1.22906
APBB2	323	-1.11297	1.44814	1.48894	2.66682	-1.07591	-2.75136	1.53368	-2.00764	-2.34437	1.29018	-1.63253
APBB3	10307	-1.08729	1.24117	1.23593	1.53456	2.57643	1.54705	2.56671	1.46394	1.17966	1.35666	1.02937
APC2	10297	2.75726	-1.75977	-1.59291	6.38795	2.08524	2.16651	6.58604	2.80116	4.18899	1.00797	-1.11705
APCDD1L	164284	-4.32737	-2.04965	-1.86843	1.53438	-2.32137	-13.2173	7.76896	18.1685	22.7288	-1.09696	6.95266
APCDD1	147495	-4.73857	6.18955	6.04793	1.70045	-1.33448	-3.38146	6.05677	-1.55113	1.12792	1.46148	1.42076
APCS	325	inf	1.64922	-3.76557	-1.36931	-1.79495	2.35499	-1.51092	inf	1.97662	31.0494	inf
APC	324	-1.42174	-1.64922	-1.62218	-1.02835	-1.17282	-1.41042	1.47183	-1.62671	-1.72091	1.12723	-1.4684
APEH	327	1.44468	1.08492	1.07434	-1.04478	-2.64266	-1.10985	1.49257	1.23323	-1.07735	1.44456	1.07658
APEX1	328	1.16225	1.6194	1.67016	1.63014	1.23684	1.08408	2.06917	1.79431	1.88267	1.5966	1.06727
APEX2	27301	1.70297	1.50641	1.46537	1.79069	-1.03708	1.13811	2.09388	1.61337	2.16013	1.84564	1.1213
APH1A	51107	1.73099	-1.04649	-1.05267	1.44233	-1.13706	-1.1569	2.0342	1.44619	1.46879	1.42514	-1.01059
APH1B	83464	-1.29164	-1.01202	1.00605	1.29065	-1.60315	-1.74742	2.00545	-1.86912	-2.2681	1.37751	-1.03305
API5	8539	1.02973	1.26978	1.2791	1.3769	-1.46911	-1.41228	1.28468	1.15881	1.42499	1.75929	-1.09816
APIP	51074	-1.13155	1.52744	1.51758	1.04852	-1.79853	-1.835	2.27156	-1.42439	-1.451	1.55326	-1.14302
APITD1	378708	1.79485	1.42172	1.48967	1.4861	-1.43016	-1.28588	1.96293	1.60679	1.52367	1.81164	-1.26491
APLF	200558	-1.68638	2.27164	2.29029	1.08748	1.0429	1.1764	2.05064	1.14823	1.49239	1.0043	-1.28975
APLNR	187	-1.59701	1.26101	1.299	1.21269	2.46031	-5.82934	1.18651	-2.63259	-2.97448	2.7935	2.35383
APLN	8862	-1.0834	10.4594	10.2023	4.71553	5.1986	-3.12132	25.2662	-2.89187	-8.43459	10.9036	6.65753
APLP1	333	6.39177	-2.11871	-1.89017	3.8382	-1.25917	-2.78082	24.8397	3.2087	1.64339	-1.10759	2.14833
APLP2	334	-1.26345	-1.38143	-1.43958	1.54659	-1.74048	-1.04584	1.25112	-1.28591	-2.07262	1.40587	1.68893
APOA1BP	128240	2.34565	1.29369	1.3053	1.69091	-1.49038	-1.1223	2.62686	2.23521	2.29352	1.41227	1.04665
APOA1	335	6.73656	-247.881	-399.881	-1.11703	2.15054	-2.58117	-1.8913	1.24492	9.70213	-9.61433	1.01978
APOA2	336	29.5773	7.12431	5.89148	1.92861	3.23795	2.33108	1.79668	249.184	56.9993	1258.57	69.8995
APOA4	337	-1.16217	-387.12	-382.943	32.194	257.502	7.93779	9.65015	18.5432	-2.41625	-61.9873	2.58059
APOA5	116519	3.47171	1.77476	1.10382	1.83842	26.2059	1.84558	-1.93811	-1.36456	-1.87283	1.44997	-2.28223
APOBEC1	339	15.5167	1.58798	1.3785	3.19489	5.3982	inf	9.12071	347.614	inf	-5.4275	inf
APOBEC2	10930	-68.97	-2.05545	-1.92172	-7.2516	-1.46468	-1.08378	4.4784	2.74312	-1.73687	-2.88904	2.32293
APOBEC3A	200315	3.86073	-5.45806	-6.47888	1.18011	2.08081	1.29024	-1.35671	-2.00405	1.57672	-1.05759	-1.19559
APOBEC3B	9582	5.82609	-2.73359	-3.12354	4.31446	1.88888	2.07275	5.95297	5.88708	12.3746	5.46967	-2.55599
APOBEC3C	27350	-1.97512	-1.56023	-1.46028	1.35229	3.56912	2.8432	1.08186	1.04842	1.40812	1.12814	-1.03536
APOBEC3D	140564	1.01939	-1.54347	-1.52353	2.42183	3.64847	2.63217	1.82886	1.58681	1.4256	1.7073	-1.47176
APOBEC3F	200316	-1.03959	-1.13532	-1.10813	1.97314	2.23894	1.66301	1.3812	1.46668	1.66902	2.00764	-1.10614
APOBEC3G	60489	1.01153	-1.34639	-1.28796	2.50581	4.57452	1.8015	1.50702	1.18588	1.2129	1.68569	-1.08775
APOBEC3H	164668	2.3353	1.28841	1.21111	2.87621	7.54615	3.51639	2.38825	1.49192	1.05614	2.47516	2.831
APOBEC4	403314	14.3522	1.20317	1.23742	-24.4422	1.05838	-1.56566	6.56819	-3.57115	-7.89724	3.64817	-1.75896
APOB	338	-51.3999	-132.774	-214.03	-1.40649	1.72745	1.18408	-1.25611	8.4011	1.2814	-19.9572	2.2562
APOC1P1	342	1.50951	4.00019	3.20604	14.8395	22.8189	34.0347	-1.43324	1.04891	1.39644	11.7333	24.0976
APOC1	341	1.84561	2.37333	2.6336	2.30671	33.6846	83.0204	-1.02486	-2.36894	-2.79205	11.7264	3.26597
APOC2	344	2.66614	3.96956	3.59521	4.92243	4.3213	3.22593	1.3485	-2.22852	-3.12846	1.96552	1.98403
APOC3	345	4.06996	-167.829	-570.683	1.00334	2.89284	-12.3224	-1.60169	38.6838	20.8693	-41.5935	27.122
APOC4	346	2.39628	1.27384	1.0795	2.21924	73.3203	24.2295	-1.13976	-2.64244	-3.13388	3.12567	2.59248
APOD	347	-3.25238	-1.27206	-1.30158	-4.96887	-3.11911	-3.86493	3.66478	2.13324	-1.30908	1.12732	-5.02801
APOE	348	1.39091	1.02992	1.0232	1.94977	1.06426	1.39142	1.58404	-1.02502	-1.08033	5.44243	4.63728
APOF	319	2.37166	6.20388	6.60826	-3.4629	2.11352	-1.93311	-5.3915	22.4589	2.40507	4.56821	-1.89442
APOH	350	6.34142	1.10696	1.15452	1.00734	1.00724	-13.9563	-1.39452	1.48505	-19.1248	37.1085	23.833
APOL1	8542	1.37188	1.78271	1.74468	4.0318	3.70727	2.99785	-1.29495	1.28586	1.9798	1.93427	1.58041
APOL2	23780	1.28122	1.06438	1.02934	2.32014	2.2756	1.76021	1.44358	1.1656	1.21767	1.60341	1.21063
APOL3	80833	-1.65874	-1.13165	-1.13445	1.76104	1.66955	-2.45737	1.12692	-2.36092	-3.29043	1.49476	-1.50906
APOL4	80832	-1.74676	1.16617	1.16799	1.9524	1.03476	-2.69553	1.93542	-1.94961	-1.24642	2.86283	1.25487
APOL5	80831	-2.47242	1.79942	3.08201	-3.16601	16.5089	1.50229	2.21461	3.61722	1.54174	6.13515	1.44981
APOL6	80830	-2.01214	-1.28516	-1.35711	1.58814	1.89416	1.11231	-1.42311	-1.06325	-1.66247	1.8547	1.0273
APOLD1	81575	-4.46189	2.40543	2.56391	-1.62802	3.73094	-3.76241	2.34051	-3.98661	-5.02857	-1.17961	-1.02651
APOM	55937	-1.29634	1.11033	1.03459	-1.04093	-2.49804	-5.13424	1.17809	1.58927	1.13943	1.17892	-1.52906
APOOL	139322	-1.2393	1.08432	1.1085	-1.1529	-2.12209	-2.10689	1.37595	1.22409	1.05103	1.12875	-1.46104
APOO	79135	2.09464	1.30952	1.29799	1.15699	-2.62247	-1.47395	2.07893	1.69431	2.42019	1.80181	-1.27518
APPBP2	10513	1.01633	-1.21554	-1.18292	1.18335	-1.28787	1.06177	1.41373	-1.05457	-1.10686	1.2442	-1.37652
APPL1	26060	-1.12988	-1.03231	-1.02711	-1.45083	-1.61132	-1.20997	1.51806	-1.17018	-1.2723	1.48611	-1.42216
APPL2	55198	-1.38	-3.17665	-3.43648	1.18057	-1.15112	1.18077	1.96506	-1.00463	1.3892	1.40597	-1.08922
APP	351	-1.34626	1.11418	1.13292	2.33689	-1.85643	-1.2912	1.38926	-1.05216	1.11677	1.41708	-1.26532
APRT	353	1.3932	1.50754	1.5054	1.35828	1.35844	1.80093	1.85507	1.72739	1.60735	1.4187	1.13775
APTX	54840	1.36966	1.43358	1.41257	1.86398	-1.32436	1.01546	1.66195	1.24899	1.89682	1.90964	-1.06302
AQP10	89872	1.32355	1.60069	1.76852	4.14591	7.27728	-1.00152	56.2954	-4.43593	1.25518	-36.8229	1.36564
AQP11	282679	1.74438	-2.47422	-2.61273	2.10474	-2.21128	-1.77205	1.19847	3.86229	3.26961	-3.11671	-1.38645
AQP12A	375318	11.5364	-1.5183	-1.5534	-2.74196	inf	11.0612	inf	30.8571	8.85794	2.41621	1.07744
AQP12B	653437	15.0107	-1.2068	-1.27029	-2.10701	3.689	34.8204	6.40809	75.7303	16.7457	2.10986	-1.64575
AQP1	358	-4.35331	-1.79773	-1.82826	-1.9889	-1.90774	-1.21252	2.65406	-2.70913	-9.02964	-1.22561	2.05294
AQP2	359	-1.46787	11.3948	17.2354	-1.16313	-534.246	-246.768	5.98463	1.72817	-4.25874	68.7011	1.14196
AQP3	360	1.5279	1.95874	2.11063	-2.28292	-5.05741	-13.0478	-1.80533	1.58625	-1.33415	-4.39036	-1.48497
AQP4	361	-3.79712	-4.03659	-2.80042	-20.7093	-2.75001	-4.7827	-1.05778	-7.63491	-17.6934	-12.6718	-2.25702
AQP5	362	1.11492	91.7142	116.128	-12.3796	-19.8145	-2.93766	16.5813	3.26776	-2.30593	1.41307	4.53957
AQP6	363	1.18277	4.32163	4.93029	-1.16665	-2.31827	-10.1721	12.4201	8.32701	2.52234	2.65055	4.82917
AQP7P1	375719	-43.7004	1.03346	1.01695	-3.38095	-6.88536	-1.35039	-1.16119	1.25467	1.07734	-1.34332	-1.45413
AQP7P3	441432	-39.8791	-1.09197	-1.05973	-3.53167	-7.48116	-1.38314	-1.24032	1.50582	1.45317	-4.67429	1.25375
AQP7	364	-35.7006	-5.20157	-5.37725	-17.9056	-2.56121	-3.10942	-1.77917	1.8463	-8.67546	-3.48824	1.40101
AQP8	343	1.49212	-121.367	-133.655	1.43447	4.77867	2.56108	21.2877	-1.57446	-2.40309	1.94408	10.9297
AQP9	366	1.91192	4.74915	4.80745	3.45202	4.32886	3.94529	-1.07467	-2.85877	-4.60042	3.82582	2.34668
AQPEP	206338	-38.6781	-9.92981	-10.4331	-2.16301	2.03893	-1.29036	9.52342	3.01443	14.744	-3.02008	-2.04544
AQR	9716	-1.04679	1.13998	1.15914	1.24551	-1.35523	-1.35791	1.59111	1.10718	1.2039	1.83779	-1.14936
ARAF	369	1.09924	-1.22938	-1.25451	1.1261	-1.28547	-1.53851	1.17137	-1.03066	-1.30381	1.16383	-1.12581
ARAP1	116985	-1.07902	-1.00373	-1.02161	1.55962	1.23055	-1.0829	2.01611	-1.48091	-1.74907	1.75048	1.42732
ARAP2	116984	-1.0797	1.14944	1.16922	1.2374	1.03379	1.16822	-1.10441	-2.37249	-1.94987	1.63286	-2.30155
ARAP3	64411	-2.42429	1.75225	1.73152	2.24813	1.84864	-3.89594	2.06751	-2.4248	-2.53499	2.94008	1.70387
ARCN1	372	1.00316	1.08355	1.08558	1.34755	-1.02067	-1.4009	1.23518	1.41845	1.13087	1.59256	-1.10108
ARC	23237	-2.1621	-1.57968	-1.50484	-1.26306	-4.50178	-14.3554	1.26431	-10.5026	-8.29433	-8.98753	-5.75356
AREG	374	-1.03055	3.67237	3.96595	1.91036	1.46214	1.5226	1.36199	-1.02044	-2.71292	1.78023	1.11779
ARF1	375	1.95417	1.04913	1.04112	1.41014	1.13606	1.11598	2.09409	1.41139	1.10327	1.54984	-1.01113
ARF3	377	1.47752	-1.41155	-1.45577	1.5711	-1.25003	-1.04857	1.86924	1.14453	1.07422	1.49573	1.06683
ARF4	378	1.46149	-1.01265	1.02997	1.17044	-1.40501	-1.15693	1.55053	1.4447	-1.02385	1.57847	-1.3331
ARF5	381	1.59677	1.22029	1.19651	1.28096	1.08639	1.51553	1.76956	1.40895	1.76974	1.18879	1.21727
ARF6	382	1.36007	-1.24435	-1.22618	-1.0749	-1.32964	1.16507	1.2102	1.16043	1.30786	1.23946	1.11235
ARFGAP1	55738	1.99968	2.34374	2.22443	2.35503	1.40603	1.37916	2.54132	1.89221	1.55154	2.35182	1.0417
ARFGAP2	84364	1.0578	-1.00946	-1.03327	1.2084	-1.32745	-1.45145	1.50494	-1.03861	-1.00802	1.32326	-1.10167
ARFGAP3	26286	-1.06392	1.20971	1.26263	1.53426	-1.09648	-1.24783	1.43343	1.28452	1.18336	1.55533	-1.62055
ARFGEF1	10565	1.62598	1.19011	1.16274	1.31137	-1.88365	-1.57935	1.98045	1.5306	1.32462	1.99952	1.00859
ARFGEF2	10564	1.14493	1.42405	1.34939	1.15867	-1.80852	-1.43181	1.8092	1.30708	1.24067	2.19355	-1.12453
ARFIP1	27236	1.06529	-1.19718	-1.19784	1.05017	-1.55778	-1.22755	1.43664	1.12767	-1.17576	1.38294	1.0106
ARFIP2	23647	1.52884	1.05754	1.07154	1.24427	-1.21636	-1.18426	2.08818	1.4112	1.19304	1.28808	-1.14809
ARFRP1	10139	1.30379	1.32576	1.21704	1.62815	1.17806	1.33599	2.42881	1.24549	1.14291	1.47182	-1.0486
ARG1	383	-1.49035	-1.58813	-1.53607	-1.87057	11.5963	1.88425	-1.45213	-4.23726	-1.14626	-5.29349	-2.51321
ARG2	384	-1.39313	1.32034	1.27037	-1.228	-3.62474	-7.47506	2.87005	1.75602	1.82038	-1.13911	-1.17336
ARGFXP2	503640	1.5596	2.20243	2.21019	3.36755	3.77506	2.74768	4.8586	2.10649	1.13756	3.18043	-1.62745
ARGFX	503582	-2.10646	-1.01886	1.02488	3.12874	13.0592	5.35862	-1.0747	inf	inf	3.23341	-1.95671
ARGLU1	55082	-1.64759	2.00179	1.97092	1.35949	1.7871	1.45456	2.11444	-1.12043	-1.17809	1.83292	-1.19758
ARHGAP10	79658	-2.75053	-2.22468	-1.8895	-1.31527	1.25506	-1.04971	-1.7825	-1.21635	-1.51895	-2.58259	1.20223
ARHGAP11A	9824	4.54632	2.18755	2.30757	3.14123	2.42531	2.49146	11.0582	4.7763	8.83489	6.27498	1.03553
ARHGAP11B	89839	3.58325	2.37945	2.48985	2.76226	3.20065	2.22861	10.0588	5.03698	7.55108	5.55541	-1.17415
ARHGAP12	94134	-1.34837	1.01436	1.02789	-1.09162	-1.4907	-1.24838	1.7891	1.3453	-1.40773	2.22589	-1.08498
ARHGAP15	55843	1.09388	-2.67876	-2.50826	1.45787	2.92455	1.57142	-1.04852	-1.35558	-2.78079	1.21421	-1.7369
ARHGAP17	55114	-1.16596	-1.51583	-1.57743	1.29377	1.4724	1.08802	1.77282	-1.19191	-1.53066	1.44326	1.14334
ARHGAP18	93663	-1.07116	1.41849	1.39356	-1.25427	-1.51276	-2.39309	2.16221	-2.16915	-3.92121	1.88656	1.59643
ARHGAP19	84986	-2.18626	-1.03182	1.01749	1.46096	-1.42091	-1.66066	2.34382	-1.14009	1.2155	1.8393	2.28506
ARHGAP1	392	1.1066	1.07511	1.07551	1.40765	1.31954	1.6303	1.98798	1.30415	1.03867	1.29138	1.23847
ARHGAP20	57569	-9.21428	-5.15459	-5.24806	-2.59965	1.05033	-2.71903	-1.53871	-1.16003	-3.33953	-1.94576	-2.11531
ARHGAP21	57584	-1.93666	-1.16118	-1.14659	1.61119	-1.04101	-1.14129	1.61679	-1.27241	-1.17914	1.90784	-1.53052
ARHGAP22	58504	1.54449	1.11281	1.16787	2.55201	6.36329	5.50446	4.64608	1.3621	1.32127	1.79687	1.00122
ARHGAP23	57636	-1.77542	1.25274	1.25696	1.07947	1.00651	-1.81119	1.75374	-1.99538	1.26962	-1.14752	3.17183
ARHGAP24	83478	-2.56615	-1.33642	-1.21184	1.32111	-3.22698	-2.25726	1.07467	-2.59431	-2.04001	-1.19552	-3.34398
ARHGAP25	9938	-1.43859	-1.87692	-1.8497	1.83083	3.20764	1.29668	1.12401	-1.84089	-2.38022	1.40799	-1.61705
ARHGAP26	23092	-2.41012	1.04317	1.04032	-1.05873	1.90672	1.7697	1.84479	1.51417	-1.42697	2.37977	-1.42072
ARHGAP27	201176	-1.01173	-1.12657	-1.16346	-1.3276	1.74422	2.44698	2.11265	1.08485	-1.11146	1.37207	1.4487
ARHGAP28	79822	-1.78488	-2.18549	-2.05477	1.67373	-1.82842	-4.14182	4.89322	-1.85418	1.13657	1.078	-2.10295
ARHGAP29	9411	-1.63171	1.16828	1.34881	1.21632	-1.22825	1.21797	1.25441	-2.23715	-5.26584	1.54128	-1.09232
ARHGAP30	257106	1.22777	-1.69184	-1.69879	1.51949	4.00226	1.94662	1.13775	-2.04294	-2.87814	1.42738	-1.6921
ARHGAP31	57514	-2.35193	-1.46387	-1.41511	1.13337	1.37069	-1.59259	1.35965	-4.29835	-6.37016	1.001	-1.36925
ARHGAP32	9743	1.46936	1.15361	1.13243	-1.41784	1.05982	-1.23356	1.61354	1.55543	1.74776	1.3278	-1.1504
ARHGAP33	115703	1.75883	2.35966	2.27993	2.72274	4.48733	1.23546	5.55347	2.92861	2.65896	1.69159	-1.51088
ARHGAP36	158763	-1.57779	-1.42105	-1.16699	-5.71461	3.54762	5.66364	140.145	38.5065	22.0508	-1.38197	477.116
ARHGAP39	80728	2.95149	2.28191	2.19957	1.61338	-1.64375	1.16752	5.53374	2.13154	1.89925	4.18572	-1.26508
ARHGAP42	143872	-2.14235	-1.90251	-1.91107	1.26583	2.2894	1.01293	-1.23034	1.3283	-1.66673	1.69637	1.12252
ARHGAP4	393	1.37686	1.81929	1.86528	3.14568	1.93532	1.1834	3.32334	1.22696	-1.13871	2.7511	-1.14638
ARHGAP5	394	-1.64666	1.02135	1.04848	1.04878	-1.8666	-1.4512	1.32926	1.01136	-1.08284	1.15943	-1.23334
ARHGAP6	395	-2.61968	-1.67653	-1.53373	-2.51338	-1.60119	-2.04	2.41568	-5.35111	-9.28831	-1.37415	-2.52947
ARHGAP8	23779	1.74848	1.78078	1.76126	2.1656	-2.73808	-1.60847	2.75584	1.78873	1.89205	5.34815	-1.15855
ARHGAP9	64333	1.4263	-1.87642	-1.8509	1.96853	5.99913	2.69785	1.33143	1.0413	-1.58896	1.31457	-1.70852
ARHGDIA	396	1.54808	-1.02316	-1.03062	1.56781	1.20734	1.38323	1.55632	-1.02031	-1.03799	1.2901	1.07901
ARHGDIB	397	1.53296	-1.08464	-1.05871	1.23067	2.92995	1.34326	1.35732	-1.11163	-2.58258	1.47067	1.7708
ARHGDIG	398	-1.90694	1.3468	1.23281	-1.07587	1.41599	7.22645	16.734	2.98639	3.76615	-1.81065	2.67794
ARHGEF10L	55160	-1.14104	-1.05831	-1.09434	-2.27538	-1.40808	-1.39528	1.37542	1.13722	-1.38811	1.43694	-1.23624
ARHGEF10	9639	-2.13912	1.39122	1.52294	1.46301	1.70394	1.40569	2.40573	-2.05358	-3.54615	1.21164	-1.238
ARHGEF11	9826	1.26725	-1.27271	-1.31464	1.23083	-1.21775	-1.07155	3.72521	1.10727	1.0049	1.51744	-1.26184
ARHGEF12	23365	-1.29572	-1.14884	-1.15137	1.00568	-1.62449	-1.74041	-1.0474	-1.20127	-1.61669	1.5233	-1.02009
ARHGEF15	22899	-3.60493	1.03768	1.04447	-1.12246	1.5672	-6.64313	2.40498	-5.21223	-10.1277	1.43787	1.63572
ARHGEF16	27237	2.02223	-1.22957	-1.24495	1.34991	1.20521	-1.2258	3.09559	3.58415	3.25533	1.82643	1.23027
ARHGEF17	9828	-1.27471	-1.33146	-1.23431	1.61226	1.44567	-2.22791	2.20319	-1.48763	-2.7278	-1.17804	1.01729
ARHGEF18	23370	1.35116	-1.84607	-1.90987	1.45958	-2.04855	-1.75701	2.39818	-1.19426	-1.26588	1.22443	1.02577
ARHGEF19	128272	1.73502	2.90607	2.85646	1.63791	1.05696	1.05999	2.76989	3.24062	5.06653	2.23474	1.34894
ARHGEF1	9138	1.32514	1.65585	1.65702	2.15167	2.11095	1.17646	2.15458	1.04192	-1.16892	2.24444	-1.15405
ARHGEF2	9181	1.10906	1.17548	1.15297	1.50755	1.28187	1.43188	3.53557	-1.37066	-2.1183	1.47319	1.73655
ARHGEF33	100271715	-1.28798	-1.37153	-1.30269	3.31837	-1.01827	-1.23862	2.02071	1.69487	1.31917	-1.27246	-2.25485
ARHGEF35	445328	-1.30392	-1.02578	-1.11483	1.18645	-2.05405	1.01213	1.80187	1.44115	2.3839	1.38539	-1.68157
ARHGEF37	389337	-2.09446	-2.64923	-2.7555	1.02377	1.31178	-2.00432	4.50041	-2.48172	-1.71331	-2.01742	-1.6184
ARHGEF38	54848	-1.06887	2.57332	2.69867	-4.53035	-4.71385	-1.10608	11.7901	1.61353	-4.17638	6.29105	1.87923
ARHGEF3	50650	1.01879	1.07587	1.14879	-1.11441	-2.24497	-2.17698	3.03164	-1.78971	-2.57222	1.4461	-1.35392
ARHGEF4	50649	-2.69584	-1.77104	-1.54349	1.59845	-1.88937	1.00776	1.54383	-1.51061	3.73432	-2.74645	-1.80855
ARHGEF5	7984	-1.30573	-1.02735	-1.09771	1.32245	-1.94626	-1.02445	1.70209	1.1902	2.13035	1.53876	-1.5622
ARHGEF6	9459	-2.76198	-2.10025	-1.97181	-1.26484	2.09448	-1.02751	1.22093	-2.60271	-4.09182	-1.04532	-1.39739
ARHGEF7	8874	-1.56169	1.32242	1.29162	1.34153	1.49498	-1.06883	1.7073	-1.06456	-1.12579	1.89615	-1.19556
ARHGEF9	23229	-1.30482	-1.71058	-1.66319	-1.09078	-1.40379	-1.40705	2.09457	-1.11008	-1.48046	-1.23198	-1.271
ARID1A	8289	1.12415	1.01296	-1.00334	1.36839	-1.43442	-1.61108	1.69331	1.2452	1.14928	1.5035	-1.23985
ARID1B	57492	-1.30057	1.14199	1.12854	1.06301	-1.55304	-1.64313	1.43439	-1.11217	1.02257	1.31225	-1.43691
ARID2	196528	1.10759	1.10019	1.10536	1.34516	-1.12061	-1.12639	1.94389	1.03791	1.3382	1.67728	-1.21404
ARID3A	1820	1.74	4.6535	4.1477	2.49579	-1.20773	-2.56799	9.87676	1.78045	1.83725	3.50237	1.12134
ARID3B	10620	1.18555	-1.16077	-1.18523	1.77188	1.27247	-1.15746	2.49067	1.02099	1.38868	1.37712	-1.35908
ARID3C	138715	-1.25711	2.63833	2.91043	1.80509	3.513	2.95247	-1.98211	4.19491	5.5708	3.76673	1.47543
ARID4A	5926	-1.67916	-1.10971	-1.08421	1.10874	-1.07371	-1.39067	-1.11368	-1.525	-2.00906	1.2581	-1.30077
ARID4B	51742	1.16167	1.26941	1.27777	1.38482	-1.10146	-1.28449	2.01569	1.16747	-1.04771	1.84573	-1.24609
ARID5A	10865	-2.22219	1.54091	1.55001	1.21008	2.48879	-1.27381	1.22056	-1.93764	-2.00152	-1.0607	-1.14617
ARID5B	84159	-3.06342	1.34637	1.41358	-1.26733	-1.37554	-2.2458	1.27034	-1.22073	-1.13278	1.66205	1.17567
ARIH1	25820	-1.1956	1.09297	1.10774	1.2409	-1.17359	-1.18618	1.49874	1.03046	1.16558	1.40019	-1.1532
ARIH2	10425	-1.27575	1.2477	1.27086	-1.01486	-1.44498	-1.04615	2.04127	-1.0235	-1.20925	1.26441	-1.15787
ARL10	285598	-2.08418	-1.0299	-1.02709	1.64983	1.96908	-1.12745	1.5735	1.1076	1.70281	-1.21573	-1.34376
ARL11	115761	2.14768	1.31108	1.18847	1.74046	3.58286	2.98572	1.11831	-1.68867	-1.84489	1.93089	1.33253
ARL13A	392509	-1.06901	1.0851	1.0717	4.06406	1.66541	1.79706	2.2497	1.4896	2.2484	2.64196	-1.72164
ARL13B	200894	-1.30572	1.63271	1.67122	2.28704	-1.31783	1.02376	1.44211	-2.02094	-1.17044	1.77735	1.25533
ARL14	80117	7.61065	-4.86108	-4.33892	3.46537	-1.88855	3.25699	2.47315	31.3396	13.5052	-1.05749	-7.53465
ARL15	54622	-1.57003	-1.15166	-1.1487	1.27355	-1.40822	-3.35863	1.72425	-1.41645	-1.01453	1.57581	1.14208
ARL16	339231	1.21994	1.41189	1.46761	1.50637	1.06738	1.42228	3.58511	1.74565	1.69009	1.38806	1.06744
ARL17A	51326	1.00271	1.4137	1.39145	1.33595	-1.1094	1.14401	2.84495	1.71288	1.45872	1.37764	-1.53672
ARL17B	641522	-1.33309	1.4248	1.39043	1.53801	1.13458	1.35909	3.08597	1.18098	1.00744	1.89207	-1.48508
ARL1	400	1.22446	-1.00467	1.05118	-1.12021	-1.11723	-1.00294	1.57752	1.30335	1.12602	1.36436	-1.07917
ARL2BP	23568	-1.21168	-1.03423	1.01514	1.54796	1.35752	1.54655	1.7916	-1.16068	-1.05365	1.09139	-1.08975
ARL2	402	-1.30711	1.02741	1.02354	1.231	-1.72718	-1.06121	3.35789	-1.19291	-1.09601	1.0065	-1.40358
ARL3	403	1.48984	1.22502	1.31469	1.49227	-1.62943	-1.17443	1.85889	-1.03024	-1.04206	-1.1618	-1.2001
ARL4A	10124	-3.1839	-1.15108	-1.21121	-1.13474	1.98386	1.29828	2.88163	-1.0335	1.21226	1.29163	-1.75875
ARL4C	10123	-1.64326	1.73181	1.80661	2.1697	2.74407	3.23407	1.19828	1.84106	2.29018	1.86872	-1.45099
ARL4D	379	-1.2757	-4.43189	-3.90943	-1.16988	-7.64626	-2.92814	-1.05996	1.06753	3.66182	-3.66953	-1.98973
ARL5A	26225	1.00401	1.32717	1.36054	1.01991	-1.23463	-1.44859	1.21649	-1.07012	1.01252	1.29515	-1.34435
ARL5B	221079	1.04741	1.44004	1.47274	1.23376	-1.16662	-1.28566	-1.46263	1.05998	1.21887	2.25164	-1.48416
ARL5C	390790	-1.66058	-3.33898	-3.89702	-1.09098	2.33066	1.32328	3.64648	-1.16934	-1.37089	1.67581	1.26411
ARL6IP1	23204	1.89616	1.35874	1.35855	2.02478	-1.44401	-1.02161	-1.04891	1.59642	1.67278	2.64603	-1.07879
ARL6IP4	51329	1.15838	1.10351	1.12236	1.24728	1.23365	1.11471	1.56201	-1.00072	1.02532	-1.03466	1.1691
ARL6IP5	10550	-1.38188	-1.36079	-1.32813	-1.34121	1.1306	2.06742	1.39594	-1.15796	-2.28505	1.12271	1.37538
ARL6IP6	151188	1.15129	1.5562	1.56185	2.11885	1.4303	1.37677	2.44136	1.22965	1.97907	2.33936	1.14275
ARL6	84100	-1.10373	1.13874	1.24755	1.18587	-1.4176	-1.45918	1.75371	-1.73775	-1.29301	1.10811	-1.46502
ARL8A	127829	1.52876	1.53327	1.53517	1.36863	-1.05155	1.02035	1.54479	1.01636	-1.11833	1.38657	1.1195
ARL8B	55207	1.20136	-1.0477	-1.04525	1.21195	-1.64629	-1.03893	1.7209	-1.19993	1.04497	1.16435	1.05797
ARL9	132946	2.02887	2.12654	2.88046	2.08893	1.81579	1.21084	3.77018	9.36628	9.74208	3.2555	1.03703
ARMC10	83787	1.23407	2.34852	2.37479	1.68127	1.10225	1.31191	1.36185	1.5371	1.67403	2.06567	1.02758
ARMC1	55156	1.30355	1.28587	1.36517	1.86413	-1.32916	-1.30693	2.23081	1.57649	1.73193	1.54754	-1.22165
ARMC2	84071	-1.09874	3.1218	2.9816	-1.19606	-1.18546	-1.23811	2.67284	-1.93837	-1.95134	1.8255	-1.91021
ARMC3	219681	9.85576	2.37261	2.515	-22.5671	-1.46483	2.8585	8.24891	-2.43221	-7.29691	17.2377	-3.8503
ARMC4	55130	2.15143	-2.09507	-1.83898	-10.236	1.08977	6.69379	1.13218	-3.01713	-5.65125	-1.66722	2.34317
ARMC5	79798	1.38999	1.27636	1.25352	1.21817	1.24235	1.1207	1.08357	-1.0692	1.07564	1.36626	-1.19268
ARMC6	93436	1.53407	1.55427	1.55858	1.48166	-1.08681	-1.15117	-1.05842	1.22453	1.60298	1.85454	-1.14762
ARMC7	79637	1.50418	-1.30911	-1.37325	1.76927	-1.96903	-1.06373	1.87409	1.09936	-1.06347	1.79742	-1.11113
ARMC8	25852	-1.16222	-1.16524	-1.13057	1.67521	-1.39997	1.27281	1.65202	-1.10782	1.35504	1.30893	-1.35142
ARMC9	80210	1.73307	1.41218	1.53988	1.79815	-1.44697	1.34403	4.93738	1.3414	-1.93744	1.14273	1.18953
ARMCX1	51309	-1.36214	-3.24329	-2.86698	-1.30456	-1.2646	-1.58261	1.79089	-1.94263	-2.06597	-2.221	-1.49053
ARMCX2	9823	1.12963	-1.27764	-1.2306	-1.01168	-1.79535	-1.8574	2.01125	1.10391	1.06477	-1.34829	1.26976
ARMCX3	51566	-1.077	1.54221	1.52289	-1.19465	-1.35088	-1.54375	1.25013	1.00375	-1.2576	1.33845	3.23163
ARMCX5	64860	-1.14519	1.53069	1.55149	1.06976	-1.51023	-1.54683	1.70507	1.40443	1.23462	1.71083	-1.07439
ARMCX6	54470	-1.00449	1.36688	1.39278	1.32007	-1.03167	-1.1311	1.81071	1.19419	1.46691	1.09776	1.69088
ARMS2	387715	-3.11417	1.0372	1.30611	1.1465	1.99099	1.27537	4.18726	-1.30426	1.12234	1.52339	-1.21927
ARNT2	9915	3.82545	-1.55402	-1.30072	1.97824	-3.70211	-2.58934	4.22767	-1.37354	-1.17148	1.57452	-1.0454
ARNTL2	56938	1.58259	5.31441	6.2071	1.77113	1.64875	3.00076	2.38013	7.46077	12.7634	1.82973	2.07512
ARNTL	406	-1.16287	-1.65055	-1.74313	2.03322	1.13497	1.07621	1.20845	-1.13562	-1.06622	1.15842	3.08935
ARNT	405	-1.24756	-1.26358	-1.27158	1.26147	-1.18056	-1.28705	1.67444	-1.11398	-1.36886	1.33119	-1.21106
ARPC1A	10552	1.20663	1.05824	1.05912	1.80121	1.41563	1.39374	2.34257	1.62166	2.07121	1.44264	1.0566
ARPC1B	10095	1.96673	1.3984	1.37189	3.26661	1.81027	3.30574	2.67399	1.29737	-1.21944	2.51647	1.22364
ARPC2	10109	1.16775	-1.10567	-1.11994	1.2754	1.09241	1.11966	1.86562	-1.23109	1.14189	1.1376	1.11677
ARPC3	10094	1.56085	1.08439	1.10073	1.36665	1.26457	1.71873	2.11918	1.27547	1.16589	1.52773	1.30777
ARPC4	10093	1.33255	-1.0934	-1.10167	1.13467	-1.15969	1.06034	1.8116	-1.01239	-1.12345	1.31662	1.10242
ARPC5L	81873	1.8055	1.38345	1.37419	1.60816	-1.16869	-1.15385	1.57563	1.49824	1.59304	1.64935	1.33029
ARPC5	10092	1.45161	-1.01201	-1.02203	1.66697	1.49589	1.47808	2.56797	-1.16808	-1.10925	1.99696	-1.12833
ARPP19	10776	-1.10696	1.05204	1.1347	1.46578	-1.31124	-1.23859	1.74532	-1.28597	-1.08325	1.36462	-1.11677
ARPP21	10777	-1.52847	-14.1937	-14.0527	-4.78819	2.69061	2.13707	1.44895	-1.3265	-1.80154	-5.56265	1.24659
ARR3	407	1.47869	-2.03058	-1.89759	-3.43084	2.61797	2.68159	12.3401	2.04609	1.01728	2.50477	1.57249
ARRB1	408	-1.80066	-2.0043	-2.05754	-1.4723	-1.30346	-2.00478	1.2985	-2.16448	-7.81723	-1.40054	1.04471
ARRB2	409	1.05068	1.12893	1.12062	1.77318	2.53657	2.05188	1.65202	-1.79691	-2.61972	1.47288	1.06271
ARRDC1	92714	2.08371	1.6185	1.55844	1.52512	-1.12266	1.38303	1.5501	1.33108	1.04006	2.07332	1.43881
ARRDC2	27106	-1.38166	1.10644	1.09475	1.02452	3.6533	1.87062	3.12029	-1.45508	-2.75661	1.55486	1.95285
ARRDC3	57561	-2.87504	1.14415	1.21746	-1.32191	1.20665	-1.79003	-1.10463	-1.13513	-2.20096	1.15247	-1.16005
ARRDC4	91947	-2.00039	-2.70693	-2.64972	2.25517	-1.3735	-1.2495	-1.21472	-2.07728	-1.77723	-1.37601	-1.51853
ARRDC5	645432	1.53247	-1.58943	-1.56554	1.3229	11.4638	3.94496	1.63284	1.24858	-1.75271	3.24202	-1.82916
ARSA	410	1.22263	-1.89226	-1.92076	1.45808	1.46503	1.24038	1.68659	1.37824	1.00425	-1.00963	1.1451
ARSB	411	1.29955	-1.03597	1.0169	2.07327	1.23489	1.00375	1.75585	-1.15591	-1.51814	1.45996	1.21103
ARSD	414	1.10731	-1.00035	-1.04008	-1.19342	-2.1561	-1.57893	-1.25778	1.36008	-1.5071	1.5244	1.00091
ARSE	415	1.49406	1.70755	1.64753	3.95029	1.57738	1.56383	1.11247	4.79095	-2.12475	4.02399	4.27921
ARSF	416	1.72522	-1.98171	-1.63924	-15.5775	-1.62337	-7.30135	1.49313	-2.9921	2.22695	-8.97283	2.92319
ARSG	22901	1.72492	1.39145	1.5064	-1.73313	-1.00268	1.22104	2.07156	-1.05166	-1.10774	-1.25816	-1.55402
ARSH	347527	1.73864	3.15441	3.96562	-2.98287	-22.2383	-2.56869	5.8956	50.0207	33.8824	2.19644	2.52407
ARSI	340075	2.67325	1.91656	2.07546	4.28812	-1.07154	1.51797	3.84346	-1.21329	1.44044	2.34312	5.6461
ARSJ	79642	-1.30787	1.51947	1.98262	3.57727	-1.09567	1.27946	1.20842	1.12003	1.29101	1.35321	2.17084
ARSK	153642	-1.41539	1.11113	1.15585	1.68981	-1.35037	-1.3327	1.71965	-1.09667	-1.10991	1.14868	-1.7151
ART1	417	-6.0512	-2.87057	-3.25656	-19.6467	-1.02523	-14.404	6.72051	-3.30511	-14.3149	3.30333	1.20514
ART3	419	4.8419	2.09673	2.41504	-6.56994	-1.16915	-3.27559	3.93741	1.29476	10.3049	-4.27059	-2.31401
ART4	420	-1.62826	-1.48917	-1.49055	-3.52647	-1.4948	-3.1473	-1.31372	-4.40232	-5.93912	1.35272	-4.70493
ART5	116969	-2.17906	2.16282	1.90768	-2.49664	1.52146	1.25792	1.04351	-1.09191	1.66592	2.61343	-4.54489
ARTN	9048	8.96696	1.43213	1.47709	14.2471	-1.04747	-1.49816	6.60365	7.97115	46.9327	2.59518	1.5144
ARV1	64801	1.69946	-1.33336	-1.3275	1.09678	-1.33904	-1.18033	2.11625	1.13964	1.18109	1.22461	-1.03277
ARVCF	421	-1.06993	2.08215	2.13411	1.61518	1.16052	1.11385	1.17025	1.16797	1.03121	1.31078	-1.20334
ARX	170302	2.60247	1.02795	-1.00315	-3.51826	15.0725	11.7798	24.8261	3.17058	-1.08995	-1.06948	4.26368
AR	367	1.11394	-3.40098	-2.71337	-3.61801	1.08378	1.6037	-1.58066	-1.58308	-3.07178	-2.77498	-3.54742
AS3MT	57412	1.25734	-1.36702	-1.2804	-1.16931	-1.06654	-1.10883	1.73769	1.15178	1.10058	-1.49461	-1.61503
ASAH1	427	1.01512	-1.27432	-1.22264	-1.58833	-1.73149	-1.45283	1.53492	-1.68008	-3.58655	1.65339	-1.63186
ASAH2B	653308	1.4943	1.78429	1.77627	1.55042	-1.59618	-1.63568	1.02131	3.7379	2.0678	-1.18555	-1.2946
ASAH2	56624	1.30513	-1.24871	-1.33827	1.34593	-1.94778	-1.42864	2.44116	2.60758	2.08617	-13.001	2.40405
ASAP1	50807	1.06813	1.97861	2.00176	2.63921	1.95366	-1.04497	2.87743	-1.09628	1.09311	2.14125	1.12419
ASAP2	8853	-1.10203	-1.35402	-1.35278	1.7482	-2.09263	-2.86455	3.62669	-1.04341	1.55147	2.06665	1.19193
ASAP3	55616	-1.0521	-3.33806	-3.5977	-1.65888	-2.46423	-1.45365	2.77257	-1.27406	-1.59416	-1.32445	-1.51841
ASB10	136371	-139.369	-3.30689	-4.19805	-13.2332	-19.4028	-18.9127	3.489	inf	41.1452	1.02367	-2.83409
ASB11	140456	-169.332	-15.8493	-27.743	-24.8802	1.8045	-1.50293	43.1522	16.6613	-3.29709	-19.5087	1.25357
ASB12	142689	-5.59126	-1.5751	-1.67536	-8.28265	-1.43317	-1.22185	1.73336	-1.4527	-1.63608	1.43056	1.31522
ASB13	79754	1.91735	-1.32758	-1.43056	1.30269	-1.06113	-1.37596	1.037	1.06851	1.23467	1.2054	-1.24401
ASB14	142686	-1.8023	1.08874	1.12195	-5.20694	1.19997	1.46772	2.29507	-1.03149	-1.71419	1.66985	-1.4417
ASB15	142685	-14.3448	-1.2226	-1.12419	-17.3344	-67.6836	-340.489	101.491	-2.39307	2.98728	3.42037	-1.14643
ASB16	92591	1.5611	-1.1162	-1.0696	-4.78403	-1.48941	-1.78671	8.69009	2.12661	1.67743	-2.26747	-1.52465
ASB17	127247	-1.83323	1.2039	-1.16601	1.03227	1.18533	-2.26475	inf	inf	2.54319	3.25715	inf
ASB18	401036	-6.55271	inf	inf	-6.47891	-1.14353	3.36676	-1.03061	4.36172	1.97357	21.8109	inf
ASB1	51665	-1.97065	1.03154	1.04951	1.15959	-1.5379	-1.79778	1.84869	-1.00769	-1.02864	-1.03101	-1.43438
ASB2	51676	-2.86377	-7.52284	-6.95992	-3.55644	2.57979	1.05272	1.85408	1.17447	2.03547	-3.40421	-1.86469
ASB3	51130	-1.13826	1.25084	1.26389	1.64768	-1.13017	-1.15435	1.72396	1.14756	1.34052	1.41806	-1.13481
ASB4	51666	-5.49892	7.57818	7.28014	-7.98355	1.44155	-1.77839	2.69998	2.07277	1.07491	74.474	1.37174
ASB5	140458	-88.3654	-21.2186	-16.844	-3.64271	-1.21746	-3.02432	14.5945	-1.0974	-3.35543	-5.26679	2.128
ASB6	140459	1.11321	1.42824	1.36094	1.52649	-1.35467	-1.44041	2.09351	1.36544	1.40938	1.5427	-1.02214
ASB7	140460	1.00673	-1.57298	-1.64122	1.47125	-1.13709	-1.20865	1.44296	1.00578	1.27313	1.85474	-1.23058
ASB8	140461	-1.17033	-1.53212	-1.52196	-1.63831	-1.35868	-1.45783	1.41261	1.03572	-1.08894	-1.03426	-1.25428
ASB9	140462	-1.17441	4.90447	5.02976	1.24785	-2.35042	-3.34375	1.21364	1.41673	-1.46706	2.97201	1.10868
ASCC1	51008	1.16013	1.37118	1.40533	1.69255	-1.03676	-1.02501	1.37486	1.28517	1.51236	1.61355	1.02597
ASCC2	84164	1.04736	-1.19418	-1.231	1.19701	1.23064	1.15795	1.67179	1.43208	1.62073	1.07545	-1.01713
ASCC3	10973	1.12966	1.71768	1.70952	1.55399	1.13302	1.42826	1.78596	1.6045	1.57482	2.38885	1.57208
ASCL1	429	36.8609	-2.65643	-2.434	-1.68692	7.41177	37.7942	-1.33856	36.3488	54.6064	14.9334	-2.11668
ASCL2	430	3.82023	12.0655	11.016	3.13756	-1.21074	-1.76918	1.45004	2.74187	4.6407	9.79365	-1.67747
ASCL3	56676	-1.32493	3.59498	4.65941	-35.7109	-4.1862	-5.69271	3.6918	1.84721	4.65706	4.38922	-1.80404
ASCL4	121549	6.87987	-3.30618	-3.20953	2.6427	-1.48614	-7.57288	3.52894	1.71216	69.2696	-1.00484	1.31381
ASF1A	25842	1.09073	1.09792	1.15875	1.44918	-1.79108	-1.56637	1.89407	-1.05204	1.29388	1.46345	-1.07022
ASF1B	55723	7.69898	2.0662	2.13004	3.88074	4.01221	5.81722	14.2241	5.96631	10.1351	3.75158	2.49417
ASGR1	432	-1.00681	6.67925	6.21143	1.26546	2.5946	1.4945	-1.15524	-1.00302	-1.98278	3.92226	-1.97171
ASGR2	433	1.03468	-1.23399	-1.30749	-1.35745	-1.148	-2.32284	-1.22642	2.11143	-1.31919	9.63053	1.10061
ASH1L	55870	-1.18013	-1.08905	-1.07927	1.11995	-1.56787	-1.6688	2.38629	1.2082	1.02691	1.28051	-1.5108
ASH2L	9070	1.41062	1.01659	1.03003	1.43025	-1.18385	-1.19951	1.2699	1.03757	1.69932	1.33317	-1.06117
ASIP	434	-1.15141	-2.66721	1.10008	1.35179	2.62062	10.0155	1.15903	1.29159	1.46251	2.86041	2.43986
ASL	435	1.33761	-1.32535	-1.35715	1.10546	-1.40173	-1.75879	-1.03714	1.13948	-1.531	1.47337	-1.02297
ASMTL	8623	-1.08189	1.06232	1.06389	1.12853	-1.17345	-1.91308	1.17259	-1.03961	-1.18458	-1.03436	-1.01022
ASMT	438	1.13466	1.55899	1.50065	4.56763	3.39137	1.30189	2.74174	1.99531	1.95211	2.85872	-1.34607
ASNA1	439	1.58275	1.11072	1.11856	1.46144	-1.20314	1.01519	2.38929	1.04574	1.23092	1.1489	-1.14484
ASNSD1	54529	-1.20136	1.48584	1.56309	1.17949	-1.27138	-1.44481	1.44796	1.01706	-1.02306	1.4756	-1.16597
ASNS	440	1.95388	2.8967	2.92409	2.94242	1.57144	2.63681	5.75846	3.44511	5.32505	2.07838	1.27407
ASPA	443	-12.8729	-14.3683	-13.0807	-11.1948	-1.00094	-2.71906	-2.47147	-6.13439	-13.9952	-4.04617	-2.27987
ASPDH	554235	-1.47403	-2.12401	-2.5017	2.00099	-8.48734	-14.5393	-2.24988	1.85287	1.5434	-28.0484	-1.4268
ASPG	374569	-2.62058	-14.899	-21.5202	-2.53138	1.44229	-11.4753	-3.31054	-1.84938	-2.25922	-4.43358	-3.58435
ASPHD1	253982	3.10897	6.25941	6.37521	2.55614	5.99633	10.788	10.9944	8.54924	2.39989	5.12395	18.2654
ASPHD2	57168	2.04293	1.26205	1.37906	2.61538	-2.2812	-3.82502	2.5404	2.73478	2.45246	1.14413	1.38492
ASPH	444	-2.08921	1.84683	2.02248	1.55268	1.14228	1.10543	3.06147	2.22598	1.79571	1.97396	-1.81657
ASPM	259266	11.1773	3.09937	3.10235	3.2664	4.30393	7.68352	26.1231	15.3848	19.7951	7.27603	-1.10872
ASPN	54829	3.66984	1.9186	2.0849	9.10994	-1.16243	-3.61802	-1.05652	1.67976	1.27253	2.81804	1.53682
ASPRV1	151516	-1.78236	-1.36142	-1.42202	1.25904	1.22942	-1.42902	1.26558	-1.98589	1.52169	1.23473	-1.63021
ASPSCR1	79058	2.04629	1.71746	1.70756	1.61843	-1.33297	1.1663	3.32282	1.46755	1.41124	2.13503	1.01016
ASRGL1	80150	1.66522	-1.03429	1.03082	-1.36533	-1.73512	2.06171	4.07578	1.211	-2.11253	1.94326	-1.01528
ASS1	445	-1.70801	-1.18817	-1.22629	1.14771	-6.94156	-9.90616	-2.26712	1.87482	1.3926	3.12702	1.21003
ASTE1	28990	-1.20187	-1.19049	-1.24576	1.86382	1.01973	-1.07664	1.38209	1.04186	1.49831	1.58624	-1.52522
ASTL	431705	2.87561	-1.05173	-1.1175	1.15666	1.26674	-2.8739	1.28093	2.37568	3.93755	3.63308	2.71741
ASTN1	460	-4.8342	-8.82387	-7.36705	-2.03833	1.61186	4.40546	-1.03292	1.60146	1.46618	-1.69217	4.3434
ASTN2	23245	1.45329	-1.36795	-1.27035	2.459	1.14556	1.31792	2.1035	1.20672	2.22219	-1.23476	1.43413
ASXL1	171023	-1.30259	2.0307	1.96108	1.75303	1.10317	-1.16189	2.60602	1.04519	-1.03735	2.0416	-1.2432
ASXL2	55252	-1.41583	1.13646	1.15039	1.33396	-1.52414	-1.30626	1.73832	-1.0044	1.07957	1.67449	-1.39575
ASXL3	80816	-3.32479	-4.46554	-4.44748	-1.99863	-2.00679	-1.73863	-1.58221	2.13127	-1.05873	-1.75819	-5.8132
ASZ1	136991	287.899	inf	inf	-1.93286	4.96862	4.67606	inf	5.6942	-1.24887	8.38576	-1.92183
ATAD1	84896	-1.15169	1.12238	1.15761	1.34594	-1.54645	-1.12898	1.29272	1.11122	1.0726	1.64532	-1.11661
ATAD2B	54454	1.12228	1.19168	1.16793	1.42328	1.02178	-1.06647	1.62591	1.49966	1.72519	1.94608	-1.25586
ATAD2	29028	3.63914	3.60714	3.67571	3.96127	1.59141	1.69412	5.48163	3.9385	5.06505	6.28578	1.52031
ATAD3A	55210	1.83248	2.02152	2.04647	1.81032	1.08304	1.31341	1.91814	2.49797	2.64896	3.45269	1.05185
ATAD3B	83858	1.57569	2.4752	2.53437	2.05856	2.3829	1.73727	3.06477	3.09497	2.49765	3.98917	-1.09647
ATAD3C	219293	1.26228	4.69983	4.22124	1.17938	-1.46817	-1.23149	-1.51074	1.39388	-1.73881	2.7459	1.03452
ATAD5	79915	2.02384	2.81197	2.93203	2.9482	2.08543	2.29959	6.80133	4.07261	6.72079	5.65478	-1.31406
ATCAY	85300	3.06688	-6.29938	-5.22476	1.31215	1.16426	1.24515	269.658	8.1305	19.6984	-5.02006	1.20066
ATE1	11101	-1.27257	-1.21774	-1.16932	-1.04878	-2.04653	-1.85548	1.26999	-1.11831	-1.14363	1.602	-1.54745
ATF1	466	-1.11918	1.12248	1.15569	1.34052	-1.29375	-1.37298	1.39734	-1.01568	1.10309	1.65346	-1.11222
ATF2	1386	-1.2744	-1.01123	-1.01485	1.6182	-1.27885	-1.37036	1.63523	1.22475	1.11809	1.43882	-1.75635
ATF3	467	-4.19903	-1.36872	-1.08377	-1.1538	-2.44899	-3.13458	-2.22337	-3.35555	-3.32918	-2.24501	-2.40689
ATF4	468	-1.12011	1.39229	1.40465	1.22983	1.81069	1.07713	1.57363	1.02806	1.21729	-1.04146	-1.26517
ATF5	22809	1.62414	1.2838	1.30858	2.24914	1.54259	1.04272	-1.47529	1.82572	3.43412	1.47683	1.9026
ATF6B	1388	1.3993	1.21976	1.19452	1.4822	1.02401	-1.29641	2.43381	1.45529	1.23311	1.5821	-1.01111
ATF6	22926	1.19236	1.12247	1.14956	1.2314	-1.73159	-1.57543	1.64379	1.11682	-1.05778	1.71897	-1.18214
ATF7IP2	80063	1.43144	1.94395	1.82971	1.87938	-1.06194	-1.28979	1.54291	1.24767	1.13295	2.74638	-1.37611
ATF7IP	55729	-1.18552	1.34109	1.35919	1.59824	-1.03613	-1.09693	1.56867	1.36539	1.48558	1.55953	-1.15546
ATF7	11016	-1.73018	1.15182	1.1552	1.14355	1.19322	1.21992	1.78095	-1.11379	-1.30925	1.209	-1.30551
ATG10	83734	-1.13407	1.02884	1.05125	1.16823	-1.08335	-1.01056	2.06887	1.17223	1.16768	1.49135	1.03774
ATG12	9140	1.01066	1.26877	1.33255	1.68439	1.70383	1.16451	1.82522	1.22224	1.14922	1.29223	-1.09963
ATG16L1	55054	1.37941	1.37123	1.39253	1.40463	1.7275	1.34044	1.49032	1.63479	1.28389	1.65394	-1.03189
ATG16L2	89849	1.35468	1.17979	1.18047	1.60295	4.87236	2.3075	2.08772	1.05544	-1.52189	1.47593	-1.00833
ATG2A	23130	1.01037	-1.12282	-1.17464	1.48895	-1.34531	-1.3099	-1.10854	1.28679	-1.00752	1.72562	1.10191
ATG2B	55102	-1.47456	-1.16238	-1.18677	1.19178	-1.49459	-1.42716	1.16023	-1.18291	-1.26918	1.36267	-1.51286
ATG3	64422	1.1426	1.15611	1.15622	1.55898	-1.16006	-1.10165	1.67706	1.00885	1.30403	1.58877	-1.13414
ATG4A	115201	1.10657	-1.699	-1.67022	-1.03055	-1.23923	-1.59965	1.43143	-1.01355	-1.10141	1.02333	-1.17953
ATG4B	23192	1.1879	1.1883	1.18005	1.37737	1.01907	1.12477	2.1052	1.31612	1.38988	1.55205	-1.11578
ATG4C	84938	-1.30657	-1.07594	-1.04384	1.4341	-1.13696	-1.6318	1.45493	1.04703	-1.17508	1.49431	-1.57998
ATG4D	84971	1.83271	-1.79505	-1.86802	1.24328	-1.30786	1.04789	1.99496	1.36581	2.42711	-1.02547	1.01085
ATG5	9474	1.047	-1.11093	-1.10074	1.59174	-1.5484	-1.23913	1.21082	1.02456	1.41196	1.6658	-1.1774
ATG7	10533	1.07773	1.0646	1.04934	1.0627	-1.03126	1.36017	1.97706	-1.1547	-1.5577	1.60294	1.10946
ATG9A	79065	-1.14564	-1.11267	-1.14445	1.31957	-1.10829	1.08702	1.68025	1.23309	1.22923	1.37031	1.17974
ATG9B	285973	4.46233	16.3726	16.2079	-1.1805	14.849	3.98307	3.38807	4.23865	5.05052	-2.39356	1.75544
ATHL1	80162	1.73085	7.82367	7.82482	3.53105	10.8432	10.7972	4.82722	3.8759	1.47969	5.3991	-1.10284
ATIC	471	1.702	2.23794	2.21794	2.0379	-1.15212	1.33569	2.39103	2.54542	2.06593	2.60113	1.84737
ATL1	51062	-1.82551	-2.16644	-2.1736	-1.62831	-1.18691	-1.09617	2.00234	-1.13295	-1.66421	-1.42105	-1.1666
ATL2	64225	-1.43592	1.06583	1.13806	1.2136	-1.25091	-1.40379	1.54953	1.62118	1.87025	-1.13387	-1.03051
ATL3	25923	-1.08467	-1.18913	-1.13901	1.77949	1.08622	-1.20436	1.85519	1.38519	1.25856	1.39655	-1.38688
ATMIN	23300	-1.27002	1.00053	-1.0014	1.25411	-1.20365	-1.27726	1.23806	1.28265	1.37272	1.25083	-1.18443
ATM	472	-1.56876	1.11164	1.16603	1.33228	1.45642	1.07877	1.45107	1.06145	-1.22961	1.62321	-1.56257
ATN1	1822	-1.24661	-1.08491	-1.06259	1.42842	-1.01572	-1.05119	2.47306	-1.17014	1.01064	-1.00331	-1.14494
ATOH1	474	inf	-2.4002	-2.30203	-1.39143	-1.12031	inf	17.728	inf	inf	1.97833	inf
ATOH7	220202	-1.00624	1.45236	1.47656	4.49133	1.47024	-1.03747	-1.08058	5.28383	11.0748	1.80283	2.38364
ATOH8	84913	-10.1202	-1.59308	-1.53959	-2.51796	-1.02365	-1.27287	-1.9948	-3.03734	-15.0881	-2.48085	-1.50179
ATOX1	475	1.75747	1.27313	1.26657	1.44909	1.10279	-1.0066	2.25179	1.27037	1.08273	1.15994	-1.28662
ATP10A	57194	1.08185	1.37849	1.35708	1.15393	-1.73466	-1.08148	5.75329	-1.84105	-5.77721	1.51401	2.52543
ATP10B	23120	1.15684	-1.20925	-1.29931	-2.67303	-6.87542	1.74309	6.86793	56.6136	10.7515	3.07008	16.1601
ATP10D	57205	-1.53066	-1.05717	1.00662	1.49127	-1.47322	-1.26524	1.4694	-1.30806	-1.07517	1.0735	-1.89843
ATP11A	23250	-1.30897	4.84758	4.65861	1.43201	2.68	1.28363	2.21213	1.08141	-4.54358	5.6323	2.65088
ATP11B	23200	-1.52623	-1.09125	-1.06748	1.57422	-1.1809	-1.062	1.42055	1.06118	3.26514	1.29423	-1.03169
ATP11C	286410	-1.41411	1.40193	1.41906	1.79673	-1.09767	-1.19917	-1.52993	1.3023	1.40941	1.93872	-1.39635
ATP12A	479	2.31221	1.87804	2.93023	-4.87969	-249.101	-462.44	11.6514	1.95346	3.3323	-8.08673	40.4815
ATP13A1	57130	1.70542	1.38572	1.34253	1.53718	-1.01189	1.26481	2.43303	1.52028	1.39763	2.15996	1.07354
ATP13A2	23400	1.80808	1.29387	1.30126	1.78852	1.21112	1.12757	3.2291	1.48994	1.32928	2.17715	1.10405
ATP13A3	79572	1.13888	1.5597	1.57279	2.52649	1.13213	1.17823	1.14739	1.42567	2.24638	3.36287	-1.50767
ATP13A4	84239	-2.78459	-6.47706	-6.88912	-4.42889	1.91153	2.78695	-2.01078	-2.48758	-6.43816	-2.07204	1.38908
ATP13A5	344905	-3.94489	-4.2501	-4.28242	1.06892	-1.29458	-15.9363	-1.371	1.84262	17.1431	-5.25624	-1.45962
ATP1A1	476	1.01554	-1.30611	-1.33641	1.30564	-7.49469	-3.89647	2.64122	-1.14177	-1.12858	1.30946	-1.56277
ATP1A2	477	-20.7594	-21.7586	-17.8811	-13.7474	-1.50847	-8.28157	7.95673	-4.96348	-12.076	-6.34827	-1.21746
ATP1A3	478	15.1279	-1.391	-1.20344	-1.69158	8.92458	11.3908	3.86807	6.1835	2.50976	1.24773	5.29034
ATP1A4	480	1.91495	-1.56181	-1.497	-1.30213	1.79774	3.60229	7.58416	1.94907	1.54581	1.60587	-1.59753
ATP1B1	481	1.35046	-1.02147	-1.04166	-1.19682	-2.75048	-2.71325	2.73461	2.53642	1.4854	2.14691	-1.21204
ATP1B2	482	-3.01067	-4.52139	-4.08726	-1.25158	-1.41674	-14.5045	1.01242	-2.78122	-4.10942	-3.32464	1.21314
ATP1B3	483	1.23833	-1.67642	-1.70117	2.74731	-1.73953	-2.11387	3.07453	-1.33387	3.32068	1.59609	1.21273
ATP1B4	23439	-160.557	-1.82994	-2.41055	-4.22398	1.98116	-1.21599	inf	-1.9964	1.85417	9.64205	1.65076
ATP2A1	487	-124.425	2.78231	2.82296	-35.2562	8.92049	7.53092	6.53409	4.42016	6.29681	5.75417	1.18128
ATP2A2	488	-1.06873	1.02013	1.02746	-1.54133	1.02904	1.32034	2.12368	1.75824	2.06761	2.11275	-1.22292
ATP2A3	489	2.89803	-3.14165	-3.07831	-2.12694	1.10354	-1.56805	1.70713	1.664	-1.70332	-1.13966	-1.32317
ATP2B1	490	-1.51326	-1.80839	-1.76406	2.35018	-1.4139	1.04091	1.58667	-1.19399	1.63137	1.91201	-1.39514
ATP2B2	491	1.15363	-3.54728	-3.2316	-12.3954	10.7382	6.61812	1.73584	2.31426	2.66918	-4.36809	1.47294
ATP2B3	492	7.4614	-3.81377	-2.8204	1.15176	-4.04089	-6.4969	2.10921	-1.79295	3.76913	-3.83115	61.6247
ATP2B4	493	-2.18443	-3.75185	-3.26634	1.83892	1.48453	1.19817	2.26536	-1.42861	-1.67534	-2.45524	1.02956
ATP2C1	27032	1.03832	1.43234	1.44957	2.28341	-1.44954	-1.05407	1.80825	-1.30746	1.44157	2.38894	-1.12936
ATP2C2	9914	2.17994	-1.08884	-1.09299	1.0583	-5.13609	-3.35949	6.47041	-1.15338	-2.06076	2.63329	-6.69168
ATP4A	495	-1.78986	1.33128	1.95115	1.82606	2.41698	2.14162	28.4098	57.4956	70.5262	-28.3803	-1.78069
ATP4B	496	2.13506	-1.17139	1.08709	2.07765	-6.57615	-7.28094	2.80632	4.87454	58.5352	-32.427	-1.39374
ATP5A1	498	-1.14143	-1.88812	-1.79652	-1.45039	-2.63954	-1.70855	1.25337	1.03611	1.24452	-1.00024	-1.16654
ATP5B	506	-1.0305	-1.55989	-1.53884	-1.13652	-2.17298	-1.24194	1.47414	1.316	1.73324	1.21951	-1.17245
ATP5C1	509	1.34988	-1.18039	-1.15908	-1.01338	-1.64443	-1.15307	1.65936	1.39755	1.48195	1.26849	-1.07336
ATP5D	513	1.32165	-1.25361	-1.28282	-1.03792	-1.06289	1.23518	1.48177	1.20047	1.4494	-1.19244	1.032
ATP5EP2	432369	1.32776	1.64684	1.58377	1.37958	-1.16582	1.29442	1.85384	1.25449	1.46262	1.56986	1.04314
ATP5E	514	1.37969	1.43918	1.41616	1.42392	-1.11618	1.38771	2.11616	1.44006	1.21396	1.72258	-1.01439
ATP5F1	515	1.08551	-1.57041	-1.52322	-1.10918	-1.75279	-1.2613	1.43761	1.14808	1.22597	1.12188	-1.16437
ATP5G1	516	1.73749	-1.29012	-1.25233	1.0662	-1.75388	1.24737	2.4368	1.70315	2.37011	1.20959	-1.24777
ATP5G2	517	1.17937	1.0506	1.06329	-1.02008	1.20225	1.35497	1.9668	1.40338	1.38252	1.06088	1.05048
ATP5G3	518	1.07297	-1.49548	-1.4629	1.11641	-2.06765	-1.09175	1.37906	1.47037	2.10863	1.00643	-1.10096
ATP5H	10476	1.38579	-1.13651	-1.12314	1.10922	-1.29691	1.40355	1.85384	1.55485	1.55154	1.133	-1.13114
ATP5I	521	1.43052	-1.16552	-1.15847	-1.04095	-1.15536	1.42648	1.7688	1.28817	1.37579	1.01227	-1.02998
ATP5J2	9551	1.6499	1.33801	1.33142	1.43813	-1.1976	1.59661	2.67935	1.84557	1.98439	1.56355	1.05982
ATP5J	522	1.00412	-1.56595	-1.50365	-1.11671	-1.7621	-1.29605	1.14614	1.23673	1.26704	-1.42203	-1.12264
ATP5L2	267020	1.12074	-1.14771	-1.14603	1.01663	1.63783	1.07494	1.57516	-1.2001	-1.10644	1.89342	-1.23308
ATP5L	10632	-1.08297	-1.20221	-1.16593	-1.05083	-1.53501	-1.19189	1.67253	1.1871	1.23067	1.12258	-1.05094
ATP5O	539	-1.06739	-1.39438	-1.32152	-1.2097	-1.36692	-1.13047	1.45913	1.06373	1.08143	-1.24174	-1.14888
ATP5SL	55101	1.09756	-1.07929	-1.07859	1.24704	-1.33975	-1.2334	1.66262	-1.0315	1.08082	1.09261	-1.046
ATP5S	27109	-1.2107	-1.06555	-1.02889	-1.1308	-1.96515	-1.54488	1.38771	1.01885	1.05188	1.25347	-1.25742
ATP6AP1L	92270	-1.00774	1.59494	1.58833	-1.0655	1.33046	1.63159	2.11293	1.41401	-1.01632	1.38755	-1.19568
ATP6AP1	537	2.19664	1.3009	1.27141	1.47226	-1.35498	-1.30173	2.68545	-1.02142	-1.19145	1.84726	1.33989
ATP6AP2	10159	1.28009	1.26386	1.24242	1.53969	-1.42144	-1.34783	1.72735	1.03918	1.14202	1.73217	-1.2679
ATP6V0A1	535	-1.14491	-1.2051	-1.2354	1.10991	-1.07652	1.3181	1.97143	-1.27194	-1.70727	1.1569	1.01655
ATP6V0A2	23545	1.00535	1.03582	1.02108	1.36311	-1.19449	1.08073	1.52553	-1.01708	1.03113	1.54704	1.03109
ATP6V0A4	50617	1.12709	42.2434	33.122	-12.617	-5.26677	-13.614	7.9023	5.33322	2.16034	-2.0214	18.446
ATP6V0B	533	2.43608	1.0215	1.07372	1.66962	-1.75845	-1.64598	2.02563	1.14791	1.13347	1.69875	1.05939
ATP6V0C	527	1.96698	-1.10104	-1.1325	1.12222	-1.30568	1.11208	1.87458	-1.08433	-1.09919	1.20967	1.12506
ATP6V0D1	9114	1.114	-2.01252	-2.05736	1.21163	-1.61615	-1.21984	1.73673	-1.37474	-1.70808	-1.09523	-1.1452
ATP6V0D2	245972	2.01946	-4.23788	-4.35071	2.90863	-3.35285	-17.0819	14.1889	-2.49206	-2.16273	4.80206	1.71884
ATP6V0E1	8992	1.21742	1.03679	1.05142	1.35641	-1.30717	-1.29972	1.88952	1.00809	-1.25526	1.26957	-1.10691
ATP6V0E2	155066	1.78779	1.26146	1.33705	-1.63768	-2.66562	-1.279	1.89418	1.59548	1.1557	-1.02116	-1.57702
ATP6V1A	523	1.23397	-1.08097	-1.09517	1.39286	-2.55713	-2.35101	1.66114	-1.02614	1.22384	1.92504	1.1459
ATP6V1B1	525	-1.05465	5.47106	5.66606	-14.7837	-8.26132	-28.2679	9.48747	1.33671	2.46596	4.11344	2.2715
ATP6V1B2	526	1.07637	-1.0277	-1.00837	1.22498	-1.30036	-1.26251	1.16906	-1.44035	-1.61698	1.66365	1.46036
ATP6V1C1	528	1.31919	1.51598	1.507	2.3849	-1.18874	-1.05486	3.19085	1.30096	1.25503	2.42983	-1.18182
ATP6V1C2	245973	1.61519	5.1619	5.0881	-2.06478	-4.30516	-14.5126	2.55014	7.18533	4.81068	1.95483	-1.03187
ATP6V1D	51382	1.18472	-1.45765	-1.42647	1.11969	-1.74497	-1.09912	1.72796	1.12979	-1.00891	-1.00819	1.00872
ATP6V1E1	529	-1.00326	-1.14	-1.12722	1.42114	-1.52579	-1.47162	2.14269	-1.15904	1.16655	1.16815	1.08674
ATP6V1E2	90423	-1.13184	2.62645	2.67806	1.86226	-1.32445	1.0447	2.86298	1.81444	2.65778	2.205	-1.24316
ATP6V1F	9296	1.61404	1.99673	2.00925	1.23026	-1.15771	1.53969	2.61594	1.05808	1.23775	1.4203	1.3058
ATP6V1G1	9550	1.63794	1.39464	1.4338	1.31649	-1.40999	-1.19488	1.51244	1.12566	1.1849	1.25269	1.08112
ATP6V1G2	534	1.53269	-5.43713	-4.93435	-1.57898	-2.47026	-2.23863	1.95294	1.01562	-1.21058	-3.35717	-1.74405
ATP6V1G3	127124	1.52285	-6.68285	-6.08155	-4.5985	-3.87903	-25.2897	inf	2.08669	2.66869	4.04998	-3.5935
ATP6V1H	51606	1.37321	1.29563	1.31097	1.43084	-2.54185	-1.77522	2.37185	1.03682	1.01467	1.38822	-1.27078
ATP7A	538	-1.27094	1.16195	1.19	-1.07745	-1.30263	-1.94184	2.16945	1.04857	-1.15506	1.28754	-1.10638
ATP7B	540	2.01849	1.83578	1.72873	-2.76806	1.21508	1.04204	1.1391	1.27086	-1.40443	2.08682	-2.03801
ATP8A1	10396	-1.70796	-2.11829	-2.1272	-2.52873	-1.10573	1.64406	2.01722	-1.69024	-5.4201	2.16005	-1.39379
ATP8A2	51761	1.78249	-2.6583	-2.44734	3.55724	-1.22889	1.65168	33.4391	-1.72511	-1.60272	-1.34806	1.9967
ATP8B1	5205	1.70061	-2.75113	-2.70897	-1.04955	-2.71193	-2.11743	2.36324	1.63603	1.84244	1.72793	-1.27572
ATP8B2	57198	-1.28531	-1.73562	-1.71083	1.81907	1.08285	-1.18088	2.61767	1.05155	-1.39925	-1.34495	-1.71038
ATP8B3	148229	2.35887	1.52561	1.61303	5.1426	11.5216	14.5776	3.7798	3.2092	2.68976	2.97841	1.27402
ATP8B4	79895	-2.84599	-2.09634	-2.07702	-1.05503	1.28801	-1.3813	-1.08591	1.222	-1.41944	1.86939	-1.59995
ATP8B5P	158381	1.2643	-1.02355	1.01868	1.21811	-1.17026	1.0782	1.55362	-1.50194	-1.89958	6.48044	1.10491
ATP9A	10079	-1.40995	1.47648	1.33995	-1.09881	-2.14784	-1.0383	2.45915	1.33275	1.087	1.84787	-1.2502
ATP9B	374868	-1.30175	-1.43822	-1.39927	-1.08235	-1.16522	-1.37177	1.70034	-1.3225	-1.7251	1.04943	-1.23717
ATPAF1	64756	-1.20673	-1.26094	-1.24203	-1.26144	-2.10619	-1.7179	1.04944	1.2356	1.20194	-1.05221	1.03016
ATPAF2	91647	1.28103	-1.22813	-1.20518	1.24017	-1.18054	1.32426	1.35757	1.28613	1.11074	1.23857	1.11018
ATPBD4	89978	-1.2128	1.92183	1.94508	1.34475	-1.40846	-1.05203	2.01369	1.25535	1.83719	1.62505	-1.19429
ATPIF1	93974	1.85043	-1.32153	-1.31817	1.17553	-1.65699	-1.21838	1.43068	1.20037	1.1501	1.23372	1.01349
ATRIP	84126	1.4837	1.91325	1.93678	1.27574	-1.24128	1.09522	2.65454	1.1625	1.2551	1.83808	-1.16798
ATRNL1	26033	2.70003	-7.04348	-6.73255	1.6099	-5.1116	-1.547	1.93592	1.85896	10.5877	-2.5212	1.29761
ATRN	8455	-1.1727	-1.12446	-1.14835	1.69003	-2.05736	-1.49579	1.92969	1.07441	1.72488	1.25736	-1.19922
ATRX	546	-1.33852	1.47068	1.52235	1.15015	-1.55592	-1.58881	1.63967	-1.03079	-1.26344	1.43732	-1.29175
ATR	545	-1.12084	2.09926	2.06143	1.81062	-1.26226	1.16933	2.22386	1.56827	2.11494	3.21864	-1.35035
ATXN10	25814	1.15494	1.13009	1.19817	1.35442	-1.68304	-1.40632	1.56376	1.07699	1.54891	1.47136	-1.24857
ATXN1L	342371	-1.85171	-1.12146	-1.12925	1.46629	-1.50072	-1.27232	1.84669	-1.46688	-1.3367	1.24961	-1.58108
ATXN1	6310	-1.00021	-1.1882	-1.1443	1.34323	1.2879	-1.12297	1.61259	-1.24132	-1.22549	-1.07723	-1.30863
ATXN2L	11273	1.41931	1.61408	1.57664	1.78187	1.50885	1.54432	2.57333	1.65586	1.76692	2.19369	1.1157
ATXN2	6311	-1.01598	1.37908	1.36232	1.34085	-1.05874	1.22099	2.03415	1.07627	-1.24922	1.57196	1.02886
ATXN3L	92552	4.00197	inf	inf	1.00788	1.35409	inf	inf	4.25657	7.10685	inf	-5.42807
ATXN3	4287	-1.36905	-1.06002	-1.05866	1.45569	-1.0917	-1.33958	1.30155	-1.26976	-1.15419	1.18838	-1.16426
ATXN7L1	222255	-1.34951	1.13233	1.13946	1.19686	1.07005	1.00003	1.49583	-1.24174	-1.03969	1.46515	-1.97719
ATXN7L2	127002	1.29432	2.2419	2.16394	1.38902	1.64559	2.03554	3.44388	1.46761	1.68731	2.11588	-1.01727
ATXN7L3B	552889	1.02891	1.06551	1.0742	1.24335	-1.47156	-1.45029	1.74955	1.13832	1.24566	1.40748	-1.38891
ATXN7L3	56970	1.30989	1.1203	1.09916	1.51097	-1.09973	1.1912	2.78536	1.62805	1.78093	1.75892	1.06119
ATXN7	6314	-1.35953	-1.07071	-1.09208	-1.00675	-1.27763	-1.39614	1.22903	-1.2269	-1.72563	1.40057	-1.36946
ATXN8OS	6315	inf	-122.478	-78.596	inf	-2.94171	4.29589	inf	inf	inf	-1.85751	inf
AUH	549	-1.53357	-1.57101	-1.64012	-1.14229	-2.46259	-1.85375	1.23445	-1.13195	-1.26939	1.03598	-1.12924
AUP1	550	1.46471	1.17258	1.1718	1.78032	1.18682	1.36476	1.74393	1.67932	1.71699	1.50598	-1.05287
AURKAIP1	54998	1.65584	-1.06621	-1.06742	1.32525	-1.24804	-1.05147	1.35307	1.6359	1.59108	1.24314	1.10885
AURKAPS1	6791	1.97499	2.37035	2.34538	3.97736	1.82711	1.18198	4.6534	3.03229	5.57579	4.22155	-2.51719
AURKA	6790	8.47827	3.27581	3.23238	4.61394	1.73889	2.42005	11.5373	7.0471	10.1923	5.8466	-1.34368
AURKB	9212	10.5551	2.20663	2.27234	4.8404	6.16054	10.9012	24.8045	14.7254	25.5304	4.56822	-1.50645
AURKC	6795	1.14724	-1.39724	-1.2799	1.53914	-1.02169	-1.35515	1.20259	1.19656	1.29238	2.64365	1.46588
AUTS2	26053	-1.06231	1.64167	1.61074	1.23497	1.36256	-2.19751	1.04572	1.42558	1.56333	1.14646	2.0681
AVEN	57099	-1.09123	1.56386	1.60403	1.53642	1.63518	1.4622	1.48005	1.84107	2.11364	1.38732	1.57978
AVIL	10677	1.09296	-2.16746	-2.39804	1.4341	2.00335	-1.06156	13.9133	2.39584	1.74211	4.38833	-1.50626
AVL9	23080	1.30624	1.48189	1.47442	1.70947	-1.25815	1.05782	2.13909	2.35491	1.9987	2.42374	-1.23193
AVPI1	60370	-2.40286	-1.76917	-1.70994	1.47776	-2.13923	-1.87858	-1.35462	-1.43716	-1.29607	-1.23312	1.31014
AVPR1A	552	-3.55675	-1.2644	-1.16805	1.3396	-1.69176	-19.4033	-2.88275	1.9352	-1.28885	-1.7722	-5.27714
AVPR1B	553	2.62168	-14.3896	-12.2377	1.11589	14.0128	3.20821	6.27433	13.1297	3.61783	-1.54849	1.53304
AVPR2	554	-6.85489	-1.69422	-1.56591	-2.06738	-12.1129	-7.5078	5.50241	-3.68055	-7.3334	-1.01929	-1.00045
AVP	551	-9.33667	inf	inf	1.97257	-3.07946	-1.53031	4.28499	inf	11.4026	-2.54947	6.02123
AWAT1	158833	8.16513	1.5152	1.24464	-321.072	2.80359	10.5203	1.76102	9.65472	11.6243	-1.67753	1.3639
AWAT2	158835	-1.61658	3.90026	3.61394	-404.736	-1.78106	-2.16272	1.31504	-6.05928	-10.059	3.41016	21.0858
AXIN1	8312	1.73658	1.4734	1.4128	1.82753	1.41272	1.92828	2.10034	1.56349	1.48515	1.91091	1.30871
AXIN2	8313	-1.7123	5.94546	5.71308	1.04601	-2.60025	1.31934	7.01243	-1.73342	-2.39952	3.00823	-2.16058
AXL	558	-1.63837	-2.07718	-1.9407	2.39084	2.80493	2.13899	-1.56943	-1.82798	-2.45825	-1.15865	1.26854
AZGP1	563	-1.02383	9.19155	8.33988	-16.2365	-3.79204	-4.29349	-2.12563	2.79575	-1.86445	1.36451	-3.8557
AZI1	22994	1.83366	1.98081	1.99191	2.51798	1.42476	1.66458	6.6027	2.10132	2.09066	2.64823	1.1737
AZI2	64343	-1.43847	-1.16158	-1.14183	-1.06858	-1.72262	-1.45707	1.53581	-1.35899	-1.65852	1.15293	-1.44425
AZIN1	51582	1.37953	1.66123	1.71986	1.61223	-1.35181	-1.45245	1.8634	1.41096	1.63985	2.17369	-1.30729
AZU1	566	2.65514	-1.56158	-1.69284	-2.9964	4.67649	5.83902	1.21046	1.12457	-9.2252	1.90128	24.2468
B2M	567	1.15334	-1.89505	-1.89283	2.06512	2.32139	1.52467	1.16951	-1.65789	-2.15897	1.21775	1.23431
B3GALNT1	8706	1.65073	1.32671	1.55003	1.10973	-1.26669	-1.40345	3.5472	-2.35632	-1.34948	1.8575	-1.70767
B3GALNT2	148789	1.39357	1.4925	1.53679	1.34667	-1.34936	-1.1604	2.96327	1.82019	2.52882	1.22762	-1.31222
B3GALT1	8708	-12.0468	-10.7286	-10.5867	-7.97316	1.84011	2.93087	31.6078	-1.26439	1.14669	-1.26814	-2.26275
B3GALT2	8707	-2.27391	-1.31845	-1.14319	1.4078	-3.90763	-6.28909	3.29814	-1.45577	-3.87139	1.22955	-3.53598
B3GALT4	8705	1.20267	-2.69843	-2.73277	-1.16613	-1.34265	-1.29096	2.24079	-1.14156	-1.20919	-1.38365	1.27798
B3GALT5	10317	-1.31887	-4.92043	-4.79835	-4.36958	1.08151	2.95948	2.72828	9.94976	7.25328	-1.21733	-3.76789
B3GALT6	126792	1.39176	1.73666	1.72885	1.91969	1.19124	1.23822	1.87489	1.28526	1.36499	2.31321	1.21635
B3GALTL	145173	-1.13348	1.41973	1.43765	1.88374	-1.26796	-1.60817	1.76925	-1.00682	1.23733	1.30662	-1.04119
B3GAT1	27087	-2.70341	1.08696	1.16235	1.25085	-1.06884	2.09212	-1.10397	5.8366	-1.40012	-2.23973	3.89655
B3GAT2	135152	-1.54216	-1.17386	-1.22667	2.06615	2.19057	1.41446	1.83314	1.07851	1.61308	1.79814	-1.38818
B3GAT3	26229	1.79569	1.35593	1.333	2.31195	1.1954	1.22895	2.29173	1.80503	1.56924	1.58925	1.23187
B3GNT1	11041	-1.35843	-1.3845	-1.35458	1.22102	1.01575	-1.44014	1.89069	-1.68206	-2.11917	-1.12935	-1.10785
B3GNT2	10678	-1.05872	-1.06829	-1.04582	1.25743	-1.32573	-1.91347	1.20654	-1.75375	-1.1146	1.59484	-1.01975
B3GNT3	10331	-1.86908	-1.09959	-1.08432	-1.52311	-1.80256	1.65558	6.48733	22.2993	7.83805	1.3779	60.8892
B3GNT4	79369	3.4559	2.97101	3.11431	4.88496	3.23128	-2.10238	11.295	10.8427	15.4714	4.03747	2.27152
B3GNT5	84002	-1.63957	-1.61999	-1.57261	1.59386	1.80546	1.42024	3.15269	-1.16229	2.90965	1.10819	-1.3046
B3GNT6	192134	2.06407	-3.24382	-3.21074	-5.72077	-1.26264	1.97133	9.2997	62.5124	4.37566	-2.08833	9.01255
B3GNT7	93010	1.61832	-10.9216	-10.8308	-2.29574	-1.33163	1.40012	2.08621	1.20215	-4.38218	1.05092	5.55045
B3GNT8	374907	1.29884	-2.7542	-2.94654	-1.54116	-2.86767	-2.1025	2.00036	-1.35398	-2.28678	-2.11587	4.35908
B3GNT9	84752	1.25434	1.36082	1.39833	2.45352	1.80851	1.10611	1.8009	1.15573	1.09019	1.37293	-1.17628
B3GNTL1	146712	1.61426	3.22454	3.20317	1.38183	2.35553	3.45256	4.80373	2.58942	1.48867	3.05835	1.17019
B4GALNT1	2583	2.60961	-1.51852	-1.37426	5.94439	13.8295	3.79088	38.8481	7.9843	20.8245	1.24106	1.07872
B4GALNT2	124872	5.15194	-14.6297	-14.735	4.88968	-15.8355	-3.66624	857.475	14.2463	10.6094	-2.05882	-4.09807
B4GALNT3	283358	2.84482	-1.75225	-1.80854	2.05739	-6.7681	-8.02767	3.77778	1.98812	1.97418	-1.08648	2.76543
B4GALNT4	338707	3.49858	7.61699	7.02811	4.43066	10.8707	9.89684	41.6053	43.2483	89.5986	5.79971	-1.02528
B4GALT1	2683	1.45395	-1.36445	-1.40031	1.70224	-1.33758	1.18094	-1.01144	1.4471	1.1557	1.79114	-1.06059
B4GALT2	8704	1.4116	1.40217	1.46718	1.91914	1.00532	1.13623	1.9421	2.52715	2.72741	1.42408	1.24383
B4GALT3	8703	2.19865	1.35675	1.33207	1.76292	1.01206	-1.27516	2.75336	2.139	1.77215	1.54606	1.17987
B4GALT4	8702	1.37724	-1.21084	-1.2473	2.20795	-1.02615	1.38827	1.84703	2.18921	4.74467	1.77971	-1.0581
B4GALT5	9334	-1.15932	1.07396	1.03571	-1.28932	1.28527	2.629	1.13361	1.11193	1.05581	1.92468	1.67023
B4GALT6	9331	-2.3943	1.51078	1.7354	-1.06066	-1.83272	-1.41463	2.37735	1.3493	2.42846	1.80667	2.53795
B4GALT7	11285	1.40229	1.50558	1.49711	1.63552	1.41877	1.3833	2.62094	1.75301	1.55078	1.60553	1.08042
B9D1	27077	1.39904	2.19717	2.40981	1.14305	-1.04189	1.31314	3.07622	1.03947	1.22545	1.02494	-1.12913
B9D2	80776	1.35655	-1.15131	-1.11951	1.20468	1.68061	1.00367	1.71584	-1.30262	-1.45097	1.24221	-1.19279
BAALC	79870	-1.58224	-5.60743	-4.98241	3.08927	1.16582	-1.84797	2.39531	-1.1441	1.08517	-1.6539	-1.59458
BAAT	570	1.25735	42.7598	47.0858	-1.1317	48.719	2.32072	-1.05987	3.60254	-1.75877	148.209	-1.66652
BACE1	23621	-1.56784	1.21649	1.26959	1.37902	-1.29926	-1.59611	1.22147	-1.44334	-1.441	1.17115	1.20129
BACE2	25825	1.28293	2.27095	2.28088	-1.01643	-1.33565	-1.01325	4.5204	3.09613	1.62134	1.74649	1.17411
BACH1	571	-1.25906	1.05968	1.07275	1.51227	1.08936	1.05167	1.08598	-1.2327	-1.16059	1.36087	-1.0516
BACH2	60468	-2.83174	-2.25229	-1.89333	1.20555	-2.20186	-2.0231	-1.998	-1.55933	1.2846	1.54446	-1.47179
BAD	572	1.36354	-1.68817	-1.66013	1.61514	1.10323	1.02081	1.68836	1.05906	1.10505	-1.19701	-1.06822
BAG1	573	1.37889	-1.23381	-1.21914	-1.22655	-2.70294	-1.85327	1.34691	-1.01206	-1.10365	1.26133	1.06854
BAG2	9532	1.1558	-1.80257	-1.45452	2.65978	-1.73291	1.18336	2.78556	1.59047	1.62245	-1.76556	-1.61449
BAG3	9531	1.09272	1.07486	1.09354	-1.07142	-1.34554	-1.80573	1.59032	1.18698	1.27812	-1.83786	1.04498
BAG4	9530	1.13039	1.3457	1.37735	1.85294	-1.90864	-1.71234	1.11584	1.20909	2.42611	2.05954	-1.1795
BAG5	9529	-1.30114	1.06242	1.08993	1.08658	-1.5217	-1.2064	1.38081	-1.16185	1.07803	1.44915	-1.01528
BAGE2	85319	-1.20932	1.31274	1.33704	1.2766	-2.64368	-1.78469	9.70947	2.78965	2.70947	15.3976	-1.8556
BAGE	574	9.79157	11.9077	9.53127	45.1287	-2.30879	7.19573	824.132	133.117	489.299	64.9707	-1.26251
BAHCC1	57597	-1.1483	-1.11562	-1.08169	1.78105	1.15336	-2.5824	2.897	1.15181	-1.30142	1.21075	-1.26109
BAHD1	22893	1.09134	-1.43086	-1.50204	1.385	-1.47646	-1.45076	1.53983	-1.13161	-1.15541	1.1547	1.15065
BAI1	575	-1.23172	-2.01762	-2.00712	1.53059	2.69401	2.7386	6.40272	14.3999	10.1382	-1.28609	1.14462
BAI2	576	3.96689	1.15737	1.26827	3.29272	-1.3429	2.58731	26.417	3.87158	4.6785	1.26227	1.55186
BAI3	577	-3.43138	-12.6692	-9.71055	-3.21461	-3.81621	-2.86159	-1.75533	-3.6628	-4.53026	-4.64269	2.71988
BAIAP2L1	55971	1.98006	1.30822	1.29074	1.9712	-1.58525	1.25956	2.12118	2.45329	2.29503	2.59263	-1.10209
BAIAP2L2	80115	2.73219	-1.17609	-1.25685	2.32668	2.11225	1.37033	14.8673	22.7118	16.276	1.56129	-1.26023
BAIAP2	10458	1.83452	1.85553	1.95206	1.02129	-1.37659	-1.32378	1.17939	-1.20968	-1.13779	-1.33451	1.64801
BAIAP3	8938	2.21167	-1.06094	-1.08633	-1.47978	-2.47039	-1.29424	1.31366	1.23152	-2.17947	1.17871	12.2167
BAK1	578	1.87257	-1.52616	-1.57468	2.31759	-1.22185	1.00759	3.13919	1.85865	2.15237	1.40185	-1.00493
BAMBI	25805	2.43297	3.49538	3.43278	1.00092	-1.39559	2.97865	2.35705	2.33617	1.66723	12.1868	1.27301
BANF1	8815	1.71843	1.5752	1.58939	1.99148	1.01065	1.47342	2.19004	1.60622	1.99587	1.7414	1.18716
BANF2	140836	2.41193	10.0202	17.4918	-1.2907	-1.46414	-2.66132	247.958	inf	1.92726	13.8325	-3.58551
BANK1	55024	-2.52038	-2.56537	-2.23191	1.25391	1.01167	-1.80818	2.81639	-1.76164	-3.78775	1.28222	-1.74745
BANP	54971	1.19336	1.26194	1.22824	1.70321	-1.04832	-1.24731	1.78066	1.53292	1.48968	1.57627	-1.26158
BAP1	8314	1.0102	1.02464	-1.0005	1.27439	-1.45913	-1.04458	2.10656	1.02696	1.19241	1.30313	-1.10605
BARD1	580	1.91413	1.69769	1.74614	1.18947	-1.03099	-1.31008	4.82596	2.44519	2.6012	2.16192	-1.21877
BARHL1	56751	2.74826	-1.11022	1.15384	3.8748	3.532	11.955	inf	-1.65821	19.3232	3.01419	1.28083
BARHL2	343472	8.07551	19.4264	inf	11.2909	6.81042	4.46205	inf	71.6471	118.07	12.0281	-1.25452
BARX1	56033	4.594	3.1624	2.71969	3.30288	13.6099	23.8083	9.41752	239.383	510.443	-3.9669	2.3045
BARX2	8538	-1.58803	-3.35291	-3.29741	-3.62872	5.87895	1.01825	2.50267	17.1195	17.9826	-2.66253	-2.04471
BASP1	10409	2.24385	-1.11141	-1.08139	3.84007	1.66739	1.35461	1.38957	3.66507	3.16344	1.24861	2.24843
BATF2	116071	2.01115	1.30302	1.20545	4.12177	1.52613	-1.00861	1.52614	1.25946	-1.75299	3.83317	-1.11793
BATF3	55509	1.07297	1.4646	1.46368	1.78841	3.83627	1.06431	1.31996	1.2109	-2.17403	2.02802	1.47778
BATF	10538	2.08246	2.26123	2.16577	1.57272	7.81286	4.55179	2.95143	2.37155	-1.39483	2.36113	-1.55357
BAX	581	2.12525	1.33923	1.33968	1.99024	2.00497	2.63059	2.81542	1.23687	1.16881	1.85867	1.9968
BAZ1A	11177	1.35848	1.35835	1.34873	1.62292	2.05522	2.02936	1.55197	1.48496	1.32571	2.41755	1.34215
BAZ1B	9031	1.17624	1.65288	1.65147	1.81535	1.07047	1.37425	1.8521	1.33812	1.39489	1.89326	-1.07272
BAZ2A	11176	-1.04951	1.09235	1.07247	1.49311	1.08812	1.00168	2.35338	1.1579	1.05376	1.60824	-1.0371
BAZ2B	29994	-1.65386	1.24178	1.26985	-1.19201	-1.38882	1.00012	1.15167	-1.04128	-1.41712	1.22436	-1.03892
BBC3	27113	2.39983	2.06893	1.98497	2.00237	2.82704	5.1326	2.83064	1.67222	1.19424	3.5589	4.10356
BBOX1	8424	-4.71736	1.26917	1.35697	-1.45431	-1.40987	-1.87309	-2.27142	3.6466	6.14947	-6.11866	-2.22457
BBS10	79738	-1.63953	1.31112	1.36246	1.29002	-1.23994	1.11062	1.52844	-1.18816	-1.0139	1.34443	-1.16948
BBS12	166379	-1.53639	-1.34139	-1.32352	1.40815	-1.53462	1.02221	1.89106	-1.30137	-1.53029	1.25345	-1.34701
BBS1	582	-1.07574	-1.24324	-1.2075	-1.03311	-1.65291	-1.33688	1.51571	-1.15378	-1.62979	-1.23952	-1.32965
BBS2	583	-1.68799	1.1826	1.22485	-1.17451	-1.64895	-1.02774	1.8283	-1.05396	-1.16032	-1.02936	1.04526
BBS4	585	1.09836	-1.00999	1.08005	1.38404	-1.17268	1.1222	2.38759	-1.0909	-1.07834	1.34593	-1.55336
BBS5	129880	-1.03756	1.68154	1.73563	1.02496	-1.44389	1.02395	1.45292	-1.13333	-1.05506	1.04446	-1.23859
BBS7	55212	-1.46265	1.01101	1.03626	1.3998	-1.10371	-1.21368	2.24974	-1.05386	-1.04832	1.2063	-1.40331
BBS9	27241	-1.33163	1.08986	1.11867	1.09102	-1.15632	1.12458	1.44869	1.03273	-1.3897	1.26617	1.0469
BBX	56987	-1.3888	1.05145	1.12089	1.54798	-1.78887	-1.31389	1.72198	-1.1202	1.08631	1.30223	-1.31732
BCAM	4059	1.47319	-1.31731	-1.33039	2.34223	-3.55714	-3.92144	3.38793	-1.16921	-1.5861	1.67375	-1.59492
BCAN	63827	1.66765	1.91921	1.88022	1.12718	2.88933	6.75496	44.5629	9.29503	14.0332	-1.18627	14.4138
BCAP29	55973	-1.22446	-1.25427	-1.18617	1.25802	1.2794	1.21517	1.6516	-1.25811	-1.49133	1.18396	-1.60108
BCAP31	10134	1.11371	1.86785	1.82893	1.72602	1.07744	1.34749	2.71837	1.34778	1.53937	2.10909	1.08407
BCAR1	9564	1.25206	-1.2717	-1.29191	1.75669	-1.03938	1.27017	1.52068	1.12064	1.06216	1.38323	1.38459
BCAR3	8412	-1.03769	-2.47118	-2.52064	1.8462	-2.1897	-1.83371	1.50767	-1.03065	-1.25271	-1.13767	-1.31896
BCAR4	400500	61.6719	24.244	34.1042	3.38995	2.41363	3.77563	-1.02925	126.885	26.189	54.1565	-1.04808
BCAS1	8537	5.24948	-4.72577	-4.71548	-4.40744	-5.25623	-1.45289	11.5697	4.57073	1.11707	-1.47413	-1.45512
BCAS2	10286	1.09269	1.01568	1.04893	1.27989	-1.38608	-1.43317	1.39732	1.13577	1.31303	1.30494	-1.33744
BCAS3	54828	-1.09457	-1.04643	-1.0391	1.1833	-1.2847	1.05076	1.87601	-1.25924	1.24823	1.14726	-1.23343
BCAS4	55653	1.63168	-1.08764	-1.15068	2.17751	1.38062	1.75102	2.3892	-1.24147	-1.73314	-1.15952	1.76597
BCAT1	586	1.28671	1.28271	1.37017	4.4163	2.38741	1.29398	5.81036	1.64258	-1.10059	4.38956	2.71058
BCAT2	587	1.71667	-1.25381	-1.20285	1.14714	-1.11386	1.55987	5.78021	1.11208	1.11227	1.49184	-1.15761
BCCIP	56647	1.41374	1.66797	1.72477	1.5055	-1.4345	-1.2715	1.63299	1.527	1.65824	2.01661	-1.19886
BCDIN3D	144233	1.2522	1.28848	1.29229	1.16048	-1.37892	-1.14662	1.51175	1.15718	1.25065	1.30934	-1.37402
BCHE	590	1.49043	-15.0208	-11.6823	3.81648	-1.79103	4.76706	-2.29611	-4.81613	-1.57425	-4.34115	2.72075
BCKDHA	593	1.08118	1.01089	1.02477	-1.1792	-1.20051	-1.52226	-1.08058	1.05227	1.12493	-1.14094	-1.1541
BCKDHB	594	-1.5656	-1.02363	-1.03392	-1.6457	-2.65226	-1.37323	-1.8455	1.04745	1.01049	1.05821	-1.42909
BCKDK	10295	1.44954	-1.00321	-1.00984	1.21274	1.63387	1.39258	1.08537	1.63266	1.25708	1.13737	1.21077
BCL10	8915	-1.02109	-1.71334	-1.64188	1.04487	-1.10198	-1.34778	1.32691	1.16334	1.07649	1.35313	-1.19561
BCL11A	53335	-1.40339	1.58255	1.56426	1.33949	2.88481	2.77405	4.22822	1.88894	9.70415	-1.12001	-2.49736
BCL11B	64919	1.10951	1.61665	1.51891	1.76397	2.77086	-1.00813	1.33645	1.35065	3.38237	2.255	-2.88499
BCL2A1	597	2.89158	1.60143	1.70249	2.3231	5.41791	6.56735	1.21945	-2.2361	-2.18643	2.81225	-1.42699
BCL2L10	10017	-1.43231	-1.95081	-2.02909	2.28524	-3.79885	-3.10738	2.49942	26.7416	36.4083	-1.03505	1.5378
BCL2L11	10018	1.14024	-1.78846	-1.88681	1.80743	-1.30421	-1.39357	1.54609	1.48386	1.8055	2.08581	-2.19526
BCL2L12	83596	2.21885	2.12999	2.18965	2.89673	1.12986	1.52766	2.89749	2.14893	2.73479	2.51397	1.16861
BCL2L13	23786	-1.30269	-1.20727	-1.22137	1.28535	-1.34663	-1.2731	1.18487	1.03945	1.39243	1.20061	-1.0366
BCL2L14	79370	1.52066	-1.15587	-1.17796	1.12829	-1.86313	-1.55263	3.4406	3.15953	2.10982	1.15185	-1.71446
BCL2L15	440603	1.5582	-2.17386	-2.29236	-5.64368	-4.50021	-1.52767	6.79768	12.5925	-1.0132	1.12196	-1.57787
BCL2L1	598	1.33466	2.23079	2.14622	1.23554	-1.01266	1.48545	1.70442	1.01045	-1.30125	2.22729	2.03343
BCL2L2	599	-2.00852	-1.68776	-1.60659	1.20131	-1.54237	-2.22678	1.84118	-1.87517	-1.3997	-1.46905	-1.39898
BCL2	596	-1.20291	-2.70635	-2.5899	-1.07348	1.55441	1.46425	1.49043	1.05396	1.55707	-1.40636	-3.02005
BCL3	602	2.00865	-1.07945	-1.11625	-1.09023	1.3776	1.10766	-1.14537	1.00924	-1.37749	1.42455	1.43898
BCL6B	255877	-1.76303	1.27138	1.28821	1.59346	2.37114	-4.89562	2.71788	-3.18892	-6.00622	1.93925	1.37333
BCL6	604	-2.28997	-1.05635	1.00954	-1.0307	1.41135	1.39831	1.21441	-1.28929	-1.08699	-1.29067	-1.56242
BCL7A	605	-1.04394	1.84189	1.93182	1.66915	-2.09772	1.04731	2.12775	1.27893	2.14901	2.60898	1.22957
BCL7B	9275	-1.02825	-1.16237	-1.14391	1.42822	1.03329	1.27014	1.56408	-1.18307	-1.30126	-1.01561	-1.07815
BCL7C	9274	1.56504	1.30075	1.28781	1.75584	-1.15004	-1.08709	2.2426	1.42217	1.44087	1.15288	1.26671
BCL9L	283149	-1.07902	1.23098	1.22963	1.65512	1.83071	1.08002	2.71628	1.5213	-1.00687	1.47111	-1.03379
BCL9	607	2.2319	1.47659	1.49553	1.3008	-2.21924	-1.83228	4.50972	2.67032	1.78538	1.53929	1.32408
BCLAF1	9774	-1.16252	1.26655	1.29384	1.08101	-1.45607	-1.28896	1.36106	-1.01971	1.01226	1.70252	-1.28163
BCMO1	53630	1.35072	-1.38412	-1.31947	1.58916	2.77321	2.8474	1.48288	7.69179	1.80842	-4.49297	-3.4424
BCO2	83875	-1.64678	-1.37392	-1.35426	-1.1796	1.10427	4.23233	-5.84325	-2.23734	-1.82489	-1.73028	-2.31296
BCORL1	63035	-1.07021	1.44304	1.38066	1.79328	-1.22928	-1.13926	2.86917	1.48591	1.37806	1.63595	-1.35783
BCOR	54880	1.31256	1.47266	1.45835	-1.04334	-1.50483	-1.88863	1.76906	1.18956	-1.11116	1.50581	-1.18999
BCR	613	-1.12858	1.2671	1.29455	1.41556	-2.10687	-2.00437	2.0433	1.35759	1.37492	1.59238	1.14439
BCS1L	617	1.12807	1.65289	1.64617	1.26602	1.06623	1.26982	1.97879	1.8191	1.75748	1.54416	-1.15158
BCYRN1	618	-2.88199	-1.34118	-2.09499	-1.19146	inf	inf	inf	inf	inf	-2.08125	inf
BDH1	622	1.51303	-1.86695	-1.91596	1.01479	-4.35563	-1.36989	-1.33032	2.59935	5.16024	1.28653	-1.22344
BDH2	56898	-1.84806	-1.60036	-1.64854	-1.30013	-2.11454	-1.70813	-1.6725	-1.51559	-2.31803	-1.4364	1.02204
BDKRB1	623	-1.10764	-2.868	-2.86888	1.37381	-2.00417	-6.00893	11.5647	-1.10563	-1.30997	-2.27824	-1.67482
BDKRB2	624	-1.64105	-2.20868	-2.24962	1.17522	-2.53047	-8.10083	4.07514	1.54262	-1.04456	-1.01586	-2.30551
BDNF	627	1.03322	2.58928	2.59665	2.42689	4.06611	2.92453	4.5254	-5.08591	-2.23326	2.69901	1.18189
BDP1	55814	-1.35699	1.40548	1.4634	1.20859	1.01205	-1.11575	1.5362	-1.08043	-1.49338	1.72717	-1.40135
BECN1	8678	1.07051	-1.06555	-1.06348	1.25003	-1.47179	-1.04453	1.68596	1.24257	1.06036	1.22988	1.11987
BEGAIN	57596	-1.78924	-1.03699	1.00879	1.63313	-1.09936	-1.49325	4.83318	1.10556	1.5529	1.1064	-1.20455
BEND2	139105	-6.34452	-3.76741	-3.84931	1.12322	2.21965	12.3098	-2.34686	-12.1021	-16.3932	1.73293	-3.60254
BEND3	57673	1.71853	1.65697	1.67052	1.63183	-1.62402	-1.18389	3.83955	1.76208	2.04611	2.6109	1.29991
BEND4	389206	1.02874	-5.73741	-5.38792	6.66773	1.17834	-2.40878	-1.20358	-1.07009	1.16086	1.51757	-4.61695
BEND5	79656	-2.15689	-5.57994	-4.69744	-1.52987	1.02397	-1.58649	2.88948	-1.18894	-1.11114	-2.89255	-1.17105
BEND6	221336	1.69719	-1.65783	-1.53901	3.79525	1.46022	2.45126	6.73019	3.77217	4.41424	1.37928	1.34664
BEND7	222389	-1.99463	1.08144	1.05199	-2.33126	-1.61359	1.18666	1.7226	-1.51464	-2.14199	1.32255	-1.10806
BEST1	7439	-1.93039	-1.16221	-1.20185	1.3527	4.04971	1.47155	3.07911	-1.99762	-2.91869	1.37023	1.33619
BEST2	54831	1.62392	-15.7172	-16.498	9.52622	5.32268	3.39937	8.49536	2.83286	29.681	18.4749	-1.47012
BEST3	144453	-1.32722	26.4762	28.7545	-4.27715	1.87347	3.24174	5.42622	4.32105	41.6558	32.4379	1.19264
BEST4	266675	1.14825	-81.2273	-86.6341	2.44651	5.77068	3.58125	9.07155	2.63807	1.48585	-9.8414	1.71385
BET1L	51272	1.0458	1.14611	1.12251	1.48948	1.12814	-1.21055	1.77501	1.28313	-1.06746	1.59361	-1.05219
BET1	10282	1.01083	1.4273	1.44703	1.65883	1.08124	1.3888	1.58299	1.95802	1.44132	1.74554	-1.16324
BET3L	100128327	-1.15156	-1.14492	-1.26721	3.39636	-1.0146	-6.87246	-2.16275	-3.44566	-1.05304	4.49085	2.88569
BEX1	55859	10.9666	-7.31668	-6.22384	4.50665	-1.39593	1.06316	6.07999	1.69004	3.83467	1.35396	-3.41155
BEX2	84707	-1.32965	-1.12789	-1.2054	1.13296	-2.21986	-1.35145	9.44231	-1.00334	1.90194	-1.11505	-1.5009
BEX4	56271	-1.16297	-2.79945	-3.03633	-2.18021	-1.9348	-1.61749	1.68171	-1.76615	-1.31714	-2.4207	-1.36715
BEX5	340542	-1.3707	-1.1376	-1.05178	1.02981	-2.00893	-3.53411	2.04176	-2.25393	-1.8958	1.32021	-1.41046
BFAR	51283	1.13682	1.37091	1.3801	1.91164	1.33412	1.48355	1.70685	1.17287	-1.06714	1.77271	1.21194
BFSP1	631	1.29586	4.71394	5.09745	3.52191	-2.26892	1.13339	5.06057	-1.08384	1.30442	1.12232	-1.38209
BFSP2	8419	5.55329	-3.86649	-3.52835	2.47051	-2.04277	-2.95208	16.1373	2.35336	2.69205	-2.75529	-3.22391
BGLAP	632	1.89107	-1.51426	-1.41091	1.40881	1.17733	1.30659	2.8489	1.45787	1.1951	-1.50207	1.27011
BGN	633	4.85552	7.25924	7.2696	4.02165	1.96978	-1.25843	-1.39746	1.43832	-1.07602	8.61828	1.678
BHLHA15	168620	2.548	-2.31774	-2.4789	-2.49539	5.30848	-1.3847	3.40544	7.90205	1.66046	-2.29696	-2.18862
BHLHB9	80823	-1.24252	1.18916	1.19895	1.29421	-2.30811	-1.9921	2.00755	1.22709	1.64096	1.05399	-1.5811
BHLHE22	27319	-1.34524	-1.02668	1.05949	-1.23227	1.39531	1.22056	1.14955	1.48456	-1.42617	1.21707	-2.05612
BHLHE23	128408	inf	inf	inf	2.21955	2.29333	inf	inf	-1.75562	inf	6.44693	-1.40052
BHLHE40	8553	1.29477	2.74226	3.06702	-1.31463	1.06623	-1.09222	-1.62151	1.0058	-1.26053	1.295	2.65948
BHLHE41	79365	-2.33581	-1.81916	-1.65831	1.14879	6.26732	4.93164	3.30619	-1.85765	-1.56432	2.20352	2.13238
BHMT2	23743	-9.65345	-3.78343	-3.23538	-3.16709	-1.66862	-3.21396	-1.07167	8.25126	-1.24202	-3.41434	-1.61343
BHMT	635	-1.82806	1.27813	1.37981	4.95534	-2.50573	-10.2473	-2.08564	16.3129	7.67183	-1.35534	1.15276
BICC1	80114	-2.19205	1.43968	1.62124	1.44268	-1.78613	1.20887	3.20897	1.30947	-1.49928	2.50127	-2.0458
BICD1	636	-1.02804	3.07481	3.34461	4.04689	1.50626	-1.01607	3.86745	1.50252	1.88714	2.87811	1.43165
BICD2	23299	-1.2422	1.21406	1.21553	1.78187	-1.01281	1.0874	1.64263	-1.43494	2.20699	-1.17202	-1.1243
BID	637	1.26809	1.86033	1.87292	2.72555	2.28872	1.77872	1.92324	1.36858	2.31346	2.9953	4.27059
BIK	638	2.95965	1.65363	1.71764	1.56639	-3.20955	-1.14759	8.22096	4.69455	8.5043	2.97169	-1.99821
BIN1	274	-2.89486	1.41912	1.41902	-2.6389	-1.29213	2.11384	2.16743	1.27194	-1.43825	1.39282	-1.57226
BIN2	51411	1.30154	-1.96686	-1.99253	1.73769	3.79597	1.74873	1.0181	-1.64671	-2.96968	1.29216	-1.49888
BIN3	55909	-1.17818	1.004	1.0233	1.19604	1.0064	1.28924	1.26327	-1.0349	-1.15577	1.42165	-1.07124
BIRC2	329	-1.21004	-1.17406	-1.16316	2.22297	1.00714	-1.21574	1.30122	1.01581	1.05167	1.83382	-1.11539
BIRC3	330	-1.0214	-1.45303	-1.44428	2.19478	4.69996	2.29687	2.69434	1.43775	-1.95117	1.86147	-1.35223
BIRC5	332	10.7375	2.87985	3.0071	5.15588	5.36645	9.94644	43.6404	18.2615	32.0915	4.96982	1.03526
BIRC6	57448	-1.16623	1.02521	1.03796	1.28053	-1.35985	-1.36536	1.36611	1.18626	1.16493	1.77301	-1.38683
BIRC7	79444	1.39251	6.31524	6.61374	1.83798	168.276	22.7696	10.4382	1.00549	-2.00862	40.3773	60.2736
BIRC8	112401	-1.79643	inf	inf	3.09861	inf	2.43855	inf	inf	inf	3.91044	inf
BIVM	54841	-1.49004	1.59514	1.58174	1.18986	1.44619	2.13327	1.46093	-1.21822	-1.0503	1.94207	-1.32856
BLCAP	10904	-1.64441	1.34422	1.32487	1.55732	-1.7913	-1.15137	1.27553	1.06488	2.0424	1.7599	1.00166
BLID	414899	-3.20618	inf	inf	2.24268	5.50764	-1.48163	2.01675	3.15067	1.54497	2.16267	-1.76222
BLK	640	2.49829	-5.35404	-4.50539	3.79429	1.75486	-1.391	-1.47504	1.81485	-1.36027	-1.36821	-4.85206
BLMH	642	1.40161	1.35191	1.38712	1.38701	1.12669	1.41183	2.47922	1.08367	2.26365	1.7856	1.037
BLM	641	4.04768	2.55648	2.55249	2.43386	2.19857	2.45398	11.9205	5.80846	8.33094	6.02384	-1.05764
BLNK	29760	1.88052	-1.44446	-1.44569	-2.23315	-2.43403	-2.7918	-1.29792	1.55994	1.45433	-1.08953	1.76049
BLOC1S1	2647	1.13305	-1.72946	-1.73415	-1.10205	1.08252	1.30115	1.85513	-1.03206	-1.24695	-1.2305	1.1563
BLOC1S2	282991	1.25045	1.23874	1.3057	1.34862	-1.00504	1.27226	1.6098	-1.06923	1.16949	1.86237	1.34459
BLOC1S3	388552	1.62306	1.4825	1.40881	2.57489	1.38498	1.25465	3.18267	1.16579	1.48684	2.11139	1.01949
BLVRA	644	1.49225	-1.0616	1.07242	1.28747	1.33766	2.02408	3.83036	1.187	-1.27159	-1.30554	1.25545
BLVRB	645	1.35782	-1.33398	-1.32416	-1.12899	1.18435	1.28847	1.34924	1.07924	1.10789	-1.36695	-1.23009
BLZF1	8548	1.28779	1.01601	1.02557	1.10565	-1.03903	-1.23265	2.31057	1.37294	1.28127	1.22332	-1.33891
BMF	90427	1.75442	-1.86565	-2.03681	2.17926	-1.68398	-1.53921	3.31568	2.07311	1.09507	1.75281	1.34981
BMI1	648	1.4901	1.17396	1.23666	1.40908	-1.05208	-1.22584	1.98884	1.08895	1.07081	1.67277	1.1034
BMP10	27302	-1.63819	4.50736	3.9113	9.40652	12.4577	-1.1945	-20.9189	1.16829	5.96891	5.2012	-6.39068
BMP15	9210	2.43576	-2.32032	-2.29687	-5.37329	2.18671	inf	-2.47592	-4.56974	-3.70125	7.34302	1.07951
BMP1	649	1.41206	1.05986	1.02768	4.31753	3.38669	3.51285	1.38833	1.20487	1.44582	3.42657	2.60955
BMP2K	55589	-1.37707	-1.63678	-1.63134	1.49462	1.75702	1.18734	1.08364	-1.06466	-1.25506	1.54941	-1.49122
BMP2	650	-4.71108	-3.48761	-3.43631	2.62092	1.70145	1.08012	1.82773	-3.3219	-4.75103	1.48936	-4.33215
BMP3	651	-11.7506	-28.4163	-31.1637	-5.00703	-4.20382	-4.0749	2.3271	1.0185	-1.52187	-4.02822	-1.41044
BMP4	652	-1.27203	4.12861	3.96507	-1.18448	-1.10053	1.26584	5.64268	1.11974	-1.61597	2.00135	1.11756
BMP5	653	-2.49272	-5.54132	-5.78092	-1.46072	-2.79587	-13.3955	-2.55803	-1.72562	-5.00704	-2.20973	-4.53982
BMP6	654	-3.66284	-2.72788	-2.90625	1.24167	-4.57896	-2.67855	1.42014	-1.24902	-2.98584	-1.55272	1.2164
BMP7	655	1.35312	9.84874	10.3514	1.2891	-10.0665	-1.67256	32.4548	2.12639	18.6792	1.57426	-1.56146
BMP8A	353500	6.25903	1.58429	1.51101	10.599	2.61745	-1.05681	6.86441	7.4115	4.04633	5.66044	-3.35868
BMP8B	656	1.95602	-1.64044	-1.75606	2.51941	2.04899	2.74172	4.50505	2.6301	2.06575	1.71489	-2.03778
BMPER	168667	-4.39817	-1.11404	-1.12037	1.04407	2.77399	-1.82641	-15.2887	-4.55409	-3.80326	-4.15832	2.0903
BMPR1A	657	-1.50844	-1.36911	-1.281	-1.02387	-1.57678	-1.33037	1.89268	-1.30061	-1.19892	-1.17619	-1.76511
BMPR1B	658	22.7445	1.50011	1.52917	2.58855	-7.15134	-16.7929	-1.03337	1.01861	-1.12484	-2.17315	-3.05303
BMPR2	659	-1.39103	-1.05328	-1.05961	1.25884	-1.22919	-1.4791	1.0602	-2.53644	-2.73952	1.54036	1.04706
BMS1P4	729096	-1.24311	1.60236	1.57783	1.67557	1.64168	1.15216	2.37095	1.80767	1.28877	2.17134	-1.54311
BMS1P5	399761	-1.62403	1.37265	1.36508	1.21939	1.74151	2.32632	2.15568	1.17208	-1.06318	1.77298	-1.82821
BMS1	9790	1.01159	1.78096	1.79585	1.5731	-1.1087	1.0852	1.73927	1.45303	1.49606	2.35108	-1.07111
BMX	660	-7.64318	-6.55916	-6.76739	-2.10534	2.69159	-3.16918	-1.22372	-2.06175	-4.30787	-1.21663	1.05974
BNC1	646	-2.43549	1.09134	1.29892	3.58291	1.67668	6.47017	1.26093	1.32218	10.8327	-6.43176	12.4026
BNC2	54796	-1.43438	-2.74643	-2.34605	-1.06131	1.04659	1.07411	3.12177	-1.3653	-1.53045	-1.51353	-1.20692
BNIP1	662	1.28783	1.10175	1.17498	1.33337	-1.01994	-1.2304	1.86955	1.37255	1.05692	1.51793	-1.20943
BNIP2	663	-1.67289	-1.05917	1.01705	1.55753	1.04913	-1.02594	-1.03339	-1.57065	-1.16216	1.19138	-1.17533
BNIP3L	665	-1.78755	-1.00908	1.06097	1.36187	1.72054	1.04494	1.117	-1.19331	-1.2364	1.2618	-1.13592
BNIP3	664	-1.15106	1.66082	1.76387	1.81813	2.70792	1.04501	1.13431	2.42813	2.63576	-1.43137	-1.17312
BNIPL	149428	2.03963	3.35723	2.85669	-2.41406	-6.71308	-8.0458	6.15943	-1.21316	1.16869	-17.2059	3.20839
BOC	91653	-3.19031	-2.2139	-2.03968	-2.53868	-1.03706	-1.82941	4.59035	-1.19174	1.23759	-1.67021	-1.23936
BOD1	91272	1.05123	1.70491	1.7616	1.47825	1.43773	-1.0753	2.27703	1.30134	1.5867	1.45774	-1.25192
BOK	666	-2.62087	1.34003	1.44393	1.14737	-1.10201	-1.0356	-1.00983	-1.06192	-1.7371	1.10353	-1.24396
BOLA1	51027	1.79962	-1.12191	-1.08883	1.42204	-1.07528	-1.1626	2.68498	2.05423	1.97055	1.03815	-1.07853
BOLA2	552900	2.31605	1.40993	1.39205	2.1167	1.26671	1.6984	3.84223	2.40828	2.48165	1.71723	1.01436
BOLA3	388962	1.5323	1.16758	1.22053	1.75128	-1.03776	1.22995	2.71316	2.01361	2.97921	1.61744	-1.17877
BOLL	66037	-1.60334	2.19396	2.14179	-4.48245	-2.96131	-1.17733	4.77444	12.2083	31.1121	7.16098	-2.12602
BOP1	23246	2.59005	3.80139	3.76037	2.58789	1.47134	1.16733	5.02906	4.14683	5.32691	3.4634	1.02109
BPESC1	60467	1.22732	2.89998	2.72248	13.6092	68.8264	18.6246	46.7511	inf	inf	3.53316	-2.23309
BPGM	669	1.21539	1.01938	1.05387	2.31592	-1.46321	-1.05273	2.5539	1.22102	1.22013	1.23352	1.30854
BPHL	670	-1.01117	1.12469	1.11122	1.08672	-3.37059	-2.23649	1.1869	2.60654	1.96121	-1.03001	-1.37848
BPI	671	2.05784	3.18641	3.06154	-1.53893	-7.85325	-10.4094	6.94643	-1.10891	-3.80951	2.18988	-2.71048
BPNT1	10380	1.72449	-1.58631	-1.63559	1.4097	-1.70207	-1.08782	2.00393	1.68645	1.26577	1.42171	1.00365
BPTF	2186	-1.05851	1.14816	1.14947	1.2402	-1.25442	-1.06008	1.88828	1.11948	1.02918	1.74221	-1.42182
BPY2	9083	inf	-6.42989	-6.15767	-25.4719	-1.34655	-2.72795	3.76029	inf	2.08529	inf
BRAF	673	-1.10306	1.28212	1.2857	1.22909	-1.21448	-1.17729	1.43607	1.57227	1.72742	1.37026	-1.0931
BRAP	8315	-1.08639	1.19404	1.16345	1.45853	-1.02438	1.0963	1.79394	1.21791	1.30668	1.70945	-1.05785
BRCA1	672	2.04314	2.68594	2.78624	2.9055	1.54411	2.32562	3.09148	3.09251	4.23149	4.28543	-1.47258
BRCA2	675	2.77894	4.39079	4.24716	3.13388	2.69489	2.2713	4.29091	2.18239	2.99275	7.30668	1.25561
BRCC3	79184	1.38661	1.49935	1.48865	1.10094	-2.48754	-1.19207	1.66851	1.81395	1.51441	1.95368	-1.15668
BRD1	23774	-1.13848	1.0562	1.05038	1.21726	1.03615	-1.07106	1.507	1.07597	1.30358	1.33712	-1.30369
BRD2	6046	1.05239	1.31513	1.29456	1.50544	-1.06785	-1.43429	1.72268	1.06025	1.07819	1.46386	-1.48562
BRD3	8019	1.17334	1.32961	1.32942	1.66279	-1.41465	1.01403	2.16075	1.0168	1.13397	1.66353	-1.26942
BRD4	23476	1.16129	1.23114	1.20488	1.60608	-1.08008	-1.34375	1.55167	1.02484	1.47387	1.77576	-1.23274
BRD7P3	23629	1.75541	1.54777	1.44837	1.47473	2.41951	1.53748	2.34624	-1.05608	1.03878	1.8427	-1.61353
BRD7	29117	-1.09185	1.56015	1.56823	1.29977	-1.34803	-1.01362	1.79369	1.08776	1.22394	1.48862	1.00808
BRD8	10902	-1.00235	1.33877	1.35767	1.21078	1.02964	-1.05059	2.54192	1.33271	1.01896	1.59476	-1.12485
BRD9	65980	1.03562	1.46205	1.48452	1.88899	1.252	1.24779	2.68179	1.64666	1.85052	1.97583	1.00992
BRDT	676	4.51028	19.8034	16.664	275.087	5.94668	3.15643	809.246	155.179	426.73	23.1916	2.58517
BREA2	286076	1.81239	1.62957	1.65512	4.41119	1.66015	1.97759	4.05073	1.41508	1.9954	2.42259	-1.11445
BRE	9577	1.01674	1.09252	1.0725	1.13423	-1.28926	1.05522	2.12867	1.23193	1.0662	1.25709	1.04507
BRF1	2972	1.30178	1.26947	1.25186	1.70304	-1.04864	-1.25903	1.87067	1.34045	1.30281	1.66342	-1.09226
BRF2	55290	1.61708	1.25172	1.26183	1.84697	1.02518	-1.03161	2.33513	1.36783	2.10699	1.8232	-1.1152
BRI3BP	140707	2.17046	1.15775	1.18661	1.75466	-1.58323	-1.58001	2.4913	2.94908	3.90016	2.29456	-1.47311
BRI3	25798	-1.08794	1.19569	1.16231	1.6356	1.27647	1.29697	1.7109	-1.3345	-1.71579	1.67292	1.17816
BRIP1	83990	4.34523	2.5278	2.55784	2.73542	3.21032	3.74359	4.7419	8.6213	13.1259	5.01351	1.74072
BRIX1	55299	1.50399	2.61401	2.71144	2.16487	1.151	1.09863	2.21988	2.53754	3.6992	3.15696	1.10103
BRMS1L	84312	-1.29504	1.16135	1.25384	1.64228	-1.66787	-2.18221	1.27339	1.49023	1.53664	1.27948	-1.25895
BRMS1	25855	1.85204	1.22431	1.19132	2.42516	1.00591	1.06284	2.50514	1.52143	1.72207	2.06163	1.03485
BRP44L	51660	-1.37313	-2.29924	-2.23626	-2.16915	-3.36998	-2.1352	-1.97003	-1.24561	-1.66631	-1.31717	-1.59972
BRP44	25874	1.70599	-1.35059	-1.34782	1.04537	-1.21438	-1.0681	2.27156	1.50999	1.56719	1.16607	1.28568
BRPF1	7862	-1.01028	1.34303	1.30782	1.11459	-1.17706	-1.04946	2.07514	-1.04653	-1.11881	1.56711	-1.12699
BRPF3	27154	1.07795	-1.54301	-1.63412	1.16154	-1.52193	-2.20958	2.34166	1.72503	1.03297	1.47651	-1.16272
BRS3	680	1.05197	7.30615	7.14945	4.06505	-1.30803	8.83909	81.1241	2.13374	2.3895	3.65818	1.05592
BRSK1	84446	2.17987	-1.43702	-1.3719	2.96763	1.92485	8.26094	7.70317	7.87139	6.26253	-1.50191	4.2308
BRSK2	9024	14.7829	10.6831	10.7036	6.6982	2.40043	2.5904	30.3206	5.43675	6.06124	3.0027	-3.94615
BRWD1	54014	1.04859	1.07129	1.08946	1.22178	-1.1901	-1.20491	1.21702	1.13581	1.07336	1.39573	-1.25529
BRWD3	254065	1.18529	1.5686	1.50768	1.18648	1.12748	-1.29668	1.9367	1.65188	1.7685	1.79955	-1.57865
BSCL2	26580	1.63598	1.16823	1.15858	1.04791	-1.32092	-1.04561	1.75351	1.36767	-1.09622	1.47491	1.15363
BSDC1	55108	-1.05219	-1.09318	-1.11606	1.35344	-1.07914	-1.31638	1.0082	1.10945	1.02815	1.3703	-1.04907
BSG	682	1.49148	-1.75951	-1.84522	1.78972	1.00402	1.31791	3.21671	1.25991	1.24641	1.60053	1.29776
BSND	7809	2.63271	1.82771	2.03632	-6.66812	-12.908	-35.9385	40.1568	6.12086	6.91871	17.117	1.34099
BSN	8927	1.3015	-1.0196	-1.00157	1.46114	-1.09937	-1.00516	4.17842	1.18474	1.07078	1.89606	-1.5898
BSPH1	100131137	inf	inf	inf	-8.61805	inf	inf				inf	inf
BSPRY	54836	1.72689	1.41747	1.36014	-2.35664	-4.95977	-3.04907	4.31294	2.10224	-1.15368	1.44983	-1.16674
BST1	683	-2.30695	-1.99712	-2.13784	-1.01851	-1.09994	-1.35747	1.20101	-2.1934	-2.68411	-1.67242	-1.58459
BST2	684	2.38734	2.11465	2.23166	7.42702	2.27025	-1.43023	1.17628	1.28718	-1.20675	2.36305	-1.19211
BSX	390259	inf	inf	inf	inf	inf	inf	inf	inf	10.6153	8.17186	-2.59718
BTAF1	9044	-1.69961	1.38409	1.40852	1.43619	1.39212	1.20805	1.86693	1.18485	1.11502	1.71047	-1.26521
BTBD10	84280	1.12855	-1.07751	-1.05228	1.42657	1.05221	1.11164	2.06128	1.24713	1.8238	1.49218	1.23267
BTBD11	121551	-2.29464	2.61814	2.62568	-1.29986	-3.22017	-2.23714	1.75244	3.99421	19.5442	-3.03052	-2.16477
BTBD16	118663	1.19856	18.6128	20.9594	10.4076	12.6446	10.7003	-1.05177	9.00632	12.03	23.0632	-2.01908
BTBD17	388419	2.34359	2.03777	2.86692	11.5742	2.91713	5.32934	5.94109	14.3765	14.0983	1.37583	1.29649
BTBD18	643376	-1.42247	2.53459	2.921	1.3515	1.69416	1.28222	2.29224	-1.63588	-1.52507	1.4552	-1.46294
BTBD19	149478	-1.27125	2.35468	2.27231	2.35513	3.35536	2.28278	1.03277	-1.18331	-2.00455	2.32467	-1.20786
BTBD1	53339	-1.04439	1.0086	1.03845	-1.16103	-1.42468	-1.02301	1.30819	-1.04609	1.17398	1.78723	1.04981
BTBD2	55643	1.0185	1.12994	1.1065	1.51615	1.20139	1.19226	2.01594	1.30835	1.71378	1.30909	1.05996
BTBD3	22903	-1.21138	-2.04394	-2.15469	1.1614	1.18708	-1.47456	2.31565	-1.27903	-1.0939	1.57241	1.01308
BTBD6	90135	-1.38251	-1.12953	-1.12053	1.19377	1.05578	-1.30726	1.47655	1.31051	1.29968	1.23804	1.07532
BTBD7	55727	-1.44994	-1.28618	-1.28025	1.39608	-1.24802	1.33451	1.80645	-1.00777	1.08313	1.22913	-1.34552
BTBD8	284697	-2.12131	1.16518	1.26841	-1.41048	-1.76954	-1.68979	1.43682	1.15915	-1.60857	1.99153	-1.76467
BTBD9	114781	1.05391	-1.58477	-1.63739	-1.31783	-1.69065	-1.26838	2.06237	-1.0282	-3.09568	1.21189	-1.07845
BTC	685	-1.39045	-2.23816	-1.90676	-3.20389	-5.10469	-2.56318	2.2013	-1.02621	-1.71461	-3.09345	-1.00979
BTD	686	-1.55313	-1.91675	-1.92291	-1.32509	-2.07681	-1.54713	1.07486	-1.41774	-2.42628	-1.49303	-1.34245
BTF3L4	91408	1.21512	1.45577	1.54394	1.36962	-1.01802	-1.03548	1.54588	1.49458	1.55331	1.50714	-1.06727
BTF3	689	-1.10677	1.38601	1.45962	1.00322	1.32687	1.10982	1.76383	1.28106	1.23526	1.08236	1.0295
BTG1	694	-1.45346	-1.59299	-1.61091	1.84477	1.34967	1.01251	1.22202	-1.37422	1.14794	1.07253	-1.5142
BTG2	7832	-1.48307	-1.30887	-1.19224	-1.86551	-4.64698	-3.00253	1.33588	-2.36477	-2.68676	-4.02976	-1.82526
BTG3	10950	-1.05047	1.44496	1.62578	1.73329	-1.7043	-1.5067	2.5669	-1.00459	-1.16807	1.78403	1.19969
BTG4	54766	1.82146	3.62599	2.81587	-1.09421	2.55319	3.93747	3.97471	-2.06447	-1.18803	7.76773	-6.8636
BTK	695	1.2537	-2.67636	-2.54385	1.67057	4.5015	3.93391	1.1061	-2.49388	-4.1473	1.19964	-1.60652
BTLA	151888	1.29345	-3.07862	-2.96385	1.8674	2.53217	1.26515	1.64898	1.64794	-1.26952	1.32674	-3.27661
BTN1A1	696	-3.62921	4.4939	4.53919	3.53513	2.48294	1.42433	4.15563	2.51307	3.27658	4.42223	-3.41643
BTN2A1	11120	-1.21652	1.20948	1.19805	1.66498	1.47416	-1.20565	2.24448	-1.01515	-1.36172	1.75955	-1.03975
BTN2A2	10385	1.10239	1.14892	1.15829	1.73873	2.12895	1.86912	2.62016	-1.10939	-1.52567	1.65588	-1.03016
BTN3A1	11119	-1.26323	1.09304	1.07618	2.22501	3.34774	1.511	2.15048	-1.17704	-1.89143	2.08639	-1.05527
BTN3A2	11118	-1.13265	-1.1318	-1.19167	2.12135	3.52609	1.8304	1.48722	-1.37167	-2.14072	2.11643	-1.02008
BTN3A3	10384	-1.24049	-1.18326	-1.20351	2.20086	2.46507	1.14233	1.30358	-1.71211	-2.60223	1.80658	-1.26968
BTNL2	56244	-3.00562	-4.8193	-4.41509	1.89242	1.42728	-1.04653	inf	1.09193	1.04851	-3.416	1.59526
BTNL3	10917	-1.86657	-6.35949	-6.94468	1.1268	1.91984	-2.36683	14.7952	-2.45424	-7.72909	-3.74363	-2.34711
BTNL8	79908	-1.63621	-8.83433	-9.23984	1.05657	1.92878	-1.58886	22.0402	-2.79098	-9.974	-2.51627	-3.23775
BTNL9	153579	-15.9343	2.12393	2.36049	2.24297	4.37151	-3.5716	2.44305	-10.5757	-9.6773	2.34572	1.1861
BTRC	8945	1.19557	1.16419	1.16699	1.04876	-1.57077	-1.18461	1.65757	1.10161	1.04436	1.36026	-1.28255
BUB1B	701	7.86803	2.73129	2.83422	3.55621	2.38029	3.51305	29.2499	15.4215	22.7549	6.74933	1.44977
BUB1	699	10.3819	2.93418	3.08383	3.8328	4.24045	9.65141	31.759	8.62913	11.7853	7.13002	1.27259
BUB3	9184	1.97066	1.74344	1.79187	2.0584	1.02072	1.02142	2.26858	1.72404	2.02874	2.51832	-1.05659
BUD13	84811	-1.18295	1.27011	1.2804	1.35378	1.01618	-1.22916	2.19856	1.05719	1.13864	1.45109	-1.29147
BUD31	8896	1.47656	1.58505	1.58927	1.75242	1.15878	1.44531	2.22533	1.49045	1.72082	1.78906	1.10818
BVES	11149	-2.62587	-6.03067	-5.33271	-1.23845	-2.71955	-3.36002	1.55701	-1.74707	1.07571	-3.11932	-1.27868
BYSL	705	1.88688	3.01273	2.9255	1.83369	1.34101	1.32727	2.29471	2.60502	2.81726	3.23924	1.02365
BZRAP1	9256	-1.25663	2.5254	2.66143	-1.41846	-1.15626	1.04935	2.30764	1.03278	-1.43417	-1.20782	-1.85289
BZW1	9689	1.42503	1.29747	1.32161	1.31964	-1.19732	1.03454	1.09711	1.75967	1.53916	1.99699	-1.10061
BZW2	28969	1.75639	1.97465	2.00224	1.23103	-1.17672	1.30655	2.66122	2.66136	2.95277	2.73639	-1.28689
C10orf105	414152	-2.46504	-3.55055	-3.5336	1.81309	2.97801	-1.08259	1.62737	-2.8035	-1.97762	-1.10185	-1.6158
C10orf107	219621	1.17308	-3.19522	-2.6292	-15.1564	1.0461	2.21186	1.20632	-3.36539	-8.72071	-3.11935	-2.38194
C10orf108	414235	-4.29566	-1.75551	-1.77302	-2.24211	1.56794	-1.93416	-1.07241	3.52209	-2.0198	1.22515	-1.28153
C10orf10	11067	-5.02943	1.72825	1.74329	-1.87873	4.41939	-1.2916	-1.11673	-3.1722	-5.87202	1.76048	-1.12657
C10orf111	221060	-1.27806	1.55731	1.57669	1.04078	-1.11565	1.47035	3.1294	1.07246	-1.12303	2.00231	-1.99991
C10orf113	387638	1.08851	9.96094	6.84594	1.21081	2.87956	5.5039	-1.30478	5.12782	1.79415	4.28183	-1.07533
C10orf114	399726	1.31301	1.08322	1.19395	2.70516	-1.9728	-1.16169	1.59314	-1.50416	1.2863	1.69	1.14026
C10orf116	10974	-2.99784	-1.59507	-1.69165	-1.20931	2.12989	2.1165	1.25139	-6.14786	-5.01852	-3.63323	-1.56123
C10orf118	55088	-1.33748	-1.13716	-1.1413	-1.22645	-2.89947	-2.24427	1.11068	-1.00858	-1.47658	1.54011	-1.52748
C10orf11	83938	-1.5729	1.04195	1.12183	-1.14879	1.44463	1.7825	1.55412	-1.36095	-2.74418	1.07241	1.10418
C10orf120	399814	5.44851	2.01927	1.7501	6.19863	5.9428	inf	inf	inf	57.8458	1.74586	inf
C10orf122	387718	1.31997	-2.28403	-3.51599	2.04991	1.40459	inf	inf	2.66208	5.54812	1.25973	inf
C10orf125	282969	-1.17134	1.12966	1.09535	1.54609	-1.14126	-1.75648	-1.16016	-1.45384	-1.28659	1.09974	1.40967
C10orf128	170371	-4.18509	-2.69081	-2.5939	-1.20375	2.18355	-1.00732	3.06831	-2.976	-5.59616	-1.0767	-1.17501
C10orf129	142827	-1.37493	-1.54608	-1.84117	-498.884	-1.43505	1.66765	6.88589	-2.10241	1.15091	-5.85913	1.20476
C10orf12	26148	1.04472	-1.00769	1.02867	1.47761	-1.8656	-1.39681	1.24175	1.60144	1.75808	1.64146	-1.06498
C10orf131	100127889	1.08826	2.73253	2.45318	1.12986	1.36389	-1.13592	3.47014	-1.30197	1.0348	1.7045	4.08989
C10orf137	26098	-1.02759	1.406	1.40329	1.46745	1.13392	-1.08493	2.21295	1.60196	1.39622	2.01625	-1.22231
C10orf140	387640	-1.35694	-4.4771	-4.43827	1.21013	-2.80116	-1.3545	1.764	-1.79814	1.04792	-2.07798	-1.20988
C10orf18	54906	1.59154	1.40513	1.40504	1.54338	1.0197	1.00288	1.95081	1.44565	1.43369	2.3006	-1.33354
C10orf25	220979	-1.75143	-1.05583	1.00592	1.87009	1.6357	1.16424	1.03335	-2.19528	-2.52102	1.74222	-1.22146
C10orf26	54838	-1.15649	-1.50369	-1.5026	1.08254	1.14097	1.01356	1.15218	-1.18892	-1.48235	1.04999	-1.59035
C10orf27	219793	-2.97409	1.35789	1.32351	6.68163	1.80899	-8.9896	8.92374	2.96149	3.32741	5.11804	3.22513
C10orf28	27291	-1.13455	-1.08859	-1.13033	1.78044	1.00987	-1.01905	1.94481	1.03387	1.08233	1.90999	-1.30099
C10orf2	56652	1.13839	3.1553	3.09108	1.69995	-1.04657	1.83766	2.6585	2.6095	2.94763	3.59175	-1.03901
C10orf32	119032	-1.24495	-1.26935	-1.22561	-1.28363	-1.4634	-1.60955	1.32855	-1.81513	-2.62297	1.03193	-1.67364
C10orf35	219738	1.77973	2.94076	3.18062	2.8132	-1.10986	1.19203	3.64179	2.37016	2.32436	1.87458	1.0804
C10orf40	283025	3.46554	inf	inf	13.3916	inf	inf	-12.4082	inf	16.7987	59.1627	inf
C10orf46	143384	1.12784	1.11196	1.11714	1.63275	-1.21421	-1.10319	1.61896	1.19373	1.17791	1.69778	1.07565
C10orf47	254427	1.3588	1.43508	1.3598	1.95688	-2.43424	1.16222	1.20342	1.12472	1.18269	2.07313	1.3232
C10orf53	282966	inf	-1.05073	1.4087	-1.25952	1.58063	1.28219	4.15402	-2.99265	-2.60818	14.1314	1.59128
C10orf54	64115	-3.08914	-2.93224	-2.99771	-1.11958	2.16362	-1.00002	1.58521	-2.77563	-3.12904	-1.33748	-1.07817
C10orf55	414236	-1.3205	3.4767	3.71145	3.93058	-6.29838	-6.18334	7.56394	2.83999	4.32702	3.0371	8.36352
C10orf57	80195	1.49902	-1.35965	-1.32461	-1.31735	-1.46892	-1.02655	1.00735	1.50192	1.72638	1.05062	-1.12051
C10orf62	414157	-1.6568	11.5812	11.1753	1.22378	-1.03985	1.33893	2.29205	1.31937	6.0845	2.38285	-1.21537
C10orf67	256815	4.20601	2.83755	2.43869	2.4929	-1.89612	-1.25764	1.99258	-19.7155	-13.3794	2.18506	2.85948
C10orf68	79741	1.45451	1.61497	1.52147	1.10303	2.3987	1.18139	3.92622	1.48179	-1.35757	2.51283	-1.29676
C10orf71	118461	-382.268	1.24679	1.5255	-8.50991	-3.42784	-6.29741	1.16624	13.0014	1.34342	1.01352	1.48749
C10orf76	79591	-1.05366	-1.39096	-1.38913	1.08285	-1.09113	-1.13655	1.58796	-1.19796	-1.39833	1.06408	-1.03748
C10orf81	79949	-1.52831	4.60744	4.4249	-9.5385	-2.5325	1.16136	39.6778	2.09719	-1.8449	4.8751	8.26419
C10orf82	143379	4.72523	2.03181	1.96407	1.92163	-6.5735	-3.11506	2.13961	3.32979	10.1713	-1.25407	-1.71183
C10orf88	80007	1.07257	1.30755	1.3294	1.69583	1.03302	1.18622	2.20489	1.45959	1.378	1.957	-1.14177
C10orf90	118611	-6.55384	-1.94339	-2.11234	-4.45195	-1.94837	-1.56374	7.0643	20.5947	39.9483	1.3326	1.74494
C10orf91	170393	4.51748	2.04266	1.87236	5.84325	1.17181	2.03547	65.6938	4.45317	9.65958	4.68664	2.27511
C10orf95	79946	2.71997	1.86056	1.861	-2.00742	-3.04281	-1.38765	4.07667	-1.49884	-4.86444	2.88918	2.27755
C10orf96	374355	1.24276	inf	inf	3.54644	-1.12462	inf	inf	inf	inf	1.00205	inf
C10orf99	387695	2.5317	-3.66164	-3.84768	1.04288	57.53	63.0866	2.44153	12.319	332.073	-6.24537	2.40864
C11orf10	746	1.51288	1.25243	1.27457	1.48523	1.27799	1.25682	2.24544	1.66293	1.43376	1.37911	1.07154
C11orf16	56673	2.64033	1.65393	1.75121	-2.11631	-11.2824	-10.9118	3.27625	-2.40009	-4.23819	4.3852	1.25022
C11orf1	64776	-1.23879	1.67375	1.68058	1.00021	-1.09805	-1.10503	-1.12444	1.48215	1.42177	1.37549	-1.36854
C11orf20	25858	1.10886	4.41675	4.69194	3.73023	5.926	2.14856	26.9996	-1.30584	1.10935	5.37496	-2.61655
C11orf21	29125	1.00015	-1.04661	1.05493	1.9909	6.00241	1.60603	1.36892	-2.48033	-4.61914	2.41589	-1.52277
C11orf24	53838	1.59635	-1.07507	-1.09258	2.47334	1.46474	1.25073	1.02118	2.13407	1.61863	1.06764	1.23531
C11orf2	738	-1.42544	-1.18427	-1.22969	1.02351	-1.03591	-1.62561	1.46049	-1.05953	-1.09265	1.02831	-1.1455
C11orf30	56946	1.07093	-1.10694	-1.10706	1.42387	-1.16377	-1.4771	1.64114	1.0451	1.11455	1.45994	-1.78267
C11orf31	280636	1.77874	1.5508	1.58098	1.35795	1.31607	1.29739	1.73042	1.43079	1.49857	1.52566	1.17562
C11orf34	349633	-1.02054	-1.15973	1.03708	1.97067	2.24301	2.54329	1.87671	-1.26799	-1.53787	1.67932	-2.13233
C11orf35	256329	2.21118	1.05837	-1.00413	1.43394	2.25605	1.72532	1.47576	1.58263	1.50173	1.75238	-1.88714
C11orf36	283303	inf	9.10071	inf	3.54496	-1.5298	-1.11959	inf	31.7585	170.113	4.754	-1.10612
C11orf40	143501		-18.4671	-17.6853	inf		inf			inf	1.0103	inf
C11orf41	25758	1.56986	5.20743	8.12181	4.88066	-5.04892	-2.98124	6.5299	4.82513	27.2332	4.63769	4.89097
C11orf42	160298	-1.20384	-1.32293	-1.45004	1.99505	-1.02497	1.19234	2.09889	-1.07002	-1.1907	2.63833	-1.85336
C11orf45	219833	-1.07822	1.65858	1.65382	2.04187	-1.71134	-1.30579	2.86029	-1.45611	-1.01387	1.80905	-1.40247
C11orf46	120534	-1.1591	1.19516	1.25918	1.03336	-1.3111	-1.4184	1.40458	1.05618	-1.03109	1.15086	-1.31641
C11orf48	79081	1.93194	1.37239	1.36605	1.61193	1.04129	1.4151	2.21599	1.97805	1.58665	1.67715	1.10187
C11orf49	79096	1.45742	1.44537	1.42502	1.22782	-1.19509	1.26285	2.69174	1.24869	-1.05974	1.28805	1.6544
C11orf51	25906	1.25685	-1.08393	-1.05183	1.46361	-1.40362	-1.17177	1.68101	-1.01491	1.15329	1.06372	-1.35197
C11orf52	91894	1.07752	-1.31292	-1.36912	-1.78531	-2.57466	-1.03801	1.37313	1.04286	-2.00532	-1.04623	-1.24161
C11orf53	341032	-3.31256	-1.10235	-1.1247	1.41353	-2.09405	-17.9012	14.5936	7.81743	13.1748	3.89831	-1.03289
C11orf54	28970	-1.38032	-1.6459	-1.71403	-1.18368	-2.19946	-2.88918	-1.45663	-1.11493	-1.88557	1.07216	-1.28993
C11orf57	55216	-1.17023	1.36729	1.39671	1.06868	1.02494	-1.10804	1.68211	1.17658	1.1207	1.57728	-1.18908
C11orf58	10944	1.01374	1.33671	1.39142	1.31662	-1.11248	-1.31764	1.46262	-1.02441	-1.01208	1.28123	-1.13116
C11orf63	79864	-1.75673	-1.23952	-1.24954	1.80249	-2.19948	-1.81123	1.5368	-1.70638	-2.09973	-1.06284	-1.60596
C11orf65	160140	1.03863	2.09087	2.1412	1.11882	-1.4368	-1.24351	-1.112	1.68675	1.76139	2.25147	-1.90313
C11orf67	28971	-1.08539	-1.2706	-1.29641	-1.08215	-1.05456	-1.05938	1.55884	-1.45124	-1.767	-1.31012	-1.24438
C11orf68	83638	-1.01627	-1.04342	-1.04892	1.60143	1.00575	1.05113	2.01018	1.09834	1.00196	-1.00485	1.10329
C11orf70	85016	-1.24191	2.18212	2.86031	-1.49078	-1.63568	-1.13162	2.86584	-1.50418	-2.19642	1.96559	1.44794
C11orf71	54494	-1.09786	-1.22629	-1.2225	-1.21716	-1.81464	-1.44744	-1.052	1.11164	1.16711	1.34071	-1.32203
C11orf73	51501	-1.0899	1.50748	1.56013	1.44289	1.2476	1.35049	1.97111	1.33013	1.61479	1.2999	1.20032
C11orf74	119710	-1.26325	-1.04657	1.03292	-1.03121	-1.34625	-1.23921	2.00122	-1.17393	-1.28232	-1.17604	-3.44735
C11orf75	56935	1.15622	-1.29394	-1.26156	-1.01032	1.27209	-1.50718	1.34138	1.45836	-1.0688	1.25692	-1.65771
C11orf80	79703	1.7976	1.12113	1.11768	1.71478	-1.67019	-1.14807	4.38943	2.93381	2.33117	1.37073	3.07691
C11orf82	220042	3.15189	4.3084	4.41829	2.96847	1.38024	2.09874	5.2235	1.6724	5.14987	6.02213	1.03218
C11orf83	790955	2.26405	1.25524	1.22088	1.48682	1.10731	-1.18975	2.05213	2.26595	2.68857	1.41944	1.15067
C11orf84	144097	1.79521	2.94345	2.96999	3.56668	1.41947	1.53031	4.13507	1.945	2.79296	2.23441	1.14641
C11orf85	283129	2.93507	1.47374	1.72232	5.48921	1.05748	2.83411	2.46593	15.3936	-1.88413	4.50489	-1.6428
C11orf86	254439	10.2367	-14.3902	-14.1203	23.8824	4.63094	-2.28008	2.66681	356.444	112.129	-10.5636	218.961
C11orf87	399947	-5.29444	2.75252	3.19291	24.5792	1.06871	-3.84901	3.32309	-1.77424	14.6233	1.1737	-4.12683
C11orf88	399949	3.70684	1.28502	1.55689	-10.6489	3.37849	1.73122	6.57632	-5.16351	-7.34401	3.02206	-4.69761
C11orf92	399948	-3.34158	1.28917	1.32851	-1.8093	-3.56863	-4.05635	6.45543	-1.58566	1.71447	1.04928	-1.52728
C11orf93	120376	-1.97347	-1.06847	-1.09391	-1.01849	1.08991	1.30344	15.1343	2.10374	5.36336	2.67381	-1.79416
C11orf94	143678	-1.07729	1.25233	1.33615	1.77881	-2.29893	-1.17532	4.08345	3.03868	-1.38465	3.67105	-1.98047
C11orf95	65998	-1.56735	2.0223	2.06022	1.74047	-1.1495	-1.94582	1.7118	-1.1057	1.10778	1.36716	1.22206
C11orf9	745	1.15624	1.76246	1.84578	-1.85804	1.19461	1.46	3.87226	-3.11618	-12.2045	2.04748	6.99492
C12orf10	60314	1.07016	1.41654	1.43943	1.33492	1.15077	1.39198	1.85875	1.24578	1.38637	1.32178	1.04521
C12orf12	196477	inf	inf	inf	inf	inf	inf	2.60043	inf	inf	1.64142	inf
C12orf23	90488	1.43659	1.21399	1.3286	2.17074	-1.09275	-1.07116	1.10925	1.77271	1.29513	1.56208	-1.43255
C12orf26	84190	-1.41061	-1.50674	-1.45246	-1.19498	-1.26139	-1.21453	1.8464	-1.08032	-1.29139	1.17159	-1.36074
C12orf29	91298	-1.02696	1.72611	1.79652	-1.14002	-1.15514	-1.27706	1.18307	1.06051	1.46467	1.26564	-1.32402
C12orf32	83695	1.86413	1.55371	1.5778	1.9144	1.05064	1.42161	3.80721	2.1806	2.93709	1.87295	1.22774
C12orf34	84915	2.16516	2.60362	2.69306	1.13776	-7.34067	-6.91112	5.48297	1.63313	3.32356	1.78132	1.17108
C12orf35	55196	-1.1122	1.32445	1.32445	1.88413	1.59601	-1.12958	1.28399	1.10667	1.01495	2.13895	-1.48044
C12orf36	283422	6.47533	-2.00397	-2.04852	-1.13301	5.59906	4.68053	22.3248	107.867	73.4539	1.40355	9.92446
C12orf39	80763	-46.9078	-3.76434	-3.75	-12.7246	-1.53484	1.71917	33.6172	5.4717	-1.02596	-9.19446	-4.52614
C12orf40	283461	-1.68982	-1.49937	-2.15763	1.35609	4.14319	2.13444	3.4122	1.42457	15.4277	4.21778	1.9303
C12orf42	374470	2.35506	-1.31659	-1.19371	3.741	1.68804	1.02712	2.13001	4.66207	2.98163	2.05933	-4.3489
C12orf43	64897	-1.15149	1.09809	1.15024	1.51872	1.0121	1.02578	1.57862	-1.05265	1.00982	1.43973	-1.19371
C12orf44	60673	1.55877	1.40073	1.40205	1.65617	-1.11298	-1.07379	1.21903	1.3479	1.44403	1.51772	1.10662
C12orf45	121053	1.20862	2.15418	2.14426	1.66019	1.58351	1.92932	2.05158	2.09435	1.92787	1.554	-1.09253
C12orf47	51275	-1.03249	1.17503	1.18966	1.85458	1.20249	1.45519	2.88658	1.0881	1.34838	1.77753	1.01081
C12orf49	79794	1.23677	-1.28582	-1.29544	1.3156	-1.35326	-1.08658	2.67614	-1.82122	-2.49284	2.05528	1.31567
C12orf4	57102	1.09111	1.02769	1.04004	1.50447	1.12557	1.0521	2.05855	1.07636	1.33066	1.56836	-1.12683
C12orf50	160419	1.38259	2.40053	3.0482	3.22423	2.26817	2.65712	1.86068	1.00154	3.1845	29.4611	-1.14509
C12orf51	283450	-1.12381	-1.06533	-1.07066	-1.06961	-1.36729	-1.19125	2.09246	1.12619	-1.12037	1.20897	-1.67388
C12orf52	84934	1.66701	1.15531	1.13171	1.20143	-1.23732	-1.3153	1.29931	1.64701	1.69219	1.48067	1.11241
C12orf53	196500	-1.34634	-4.86175	-4.64907	2.66628	1.06821	2.94418	7.92911	1.57681	3.48995	-2.33922	4.65683
C12orf54	121273	-2.96389	1.03754	1.22645	1.24666	1.2003	-1.70519	11.468	1.51789	41.3082	-4.79945	1.5012
C12orf56	115749	7.91884	2.08919	1.88604	1.67104	1.12944	1.2377	96.2502	66.0328	253.085	2.03472	7.86627
C12orf57	113246	1.17501	-1.52059	-1.37879	1.3112	1.37769	-1.09461	2.02193	1.03647	1.11784	-1.14546	-1.0615
C12orf59	120939	1.96762	4.10921	4.14469	7.2182	-33.3949	-19.2076	10.5732	-1.49582	1.3173	4.09494	1.70107
C12orf5	57103	1.20602	1.76047	1.74592	1.74974	-1.04016	1.25555	1.46244	-1.06065	1.14512	2.32741	1.36114
C12orf60	144608	2.09169	1.55676	1.63529	1.72423	-1.19676	-1.09538	1.75236	-1.00261	1.12787	2.11143	-2.00779
C12orf61	283416	-1.1531	-1.13826	-1.16583	1.16569	-1.00911	1.05526	1.76402	-1.02847	1.27424	1.64363	-1.87113
C12orf65	91574	1.00256	1.49788	1.50538	2.0149	1.18118	1.55533	2.09984	1.42421	1.34436	1.47454	1.02721
C12orf66	144577	1.27791	1.92701	1.91342	1.60902	-1.19002	-1.15922	1.04312	1.93087	2.71216	2.36887	-1.3051
C12orf68	387856	-1.63096	-1.43829	-1.34402	1.1542	1.08445	-1.12472	1.01768	-1.10062	1.34757	-1.3818	1.55944
C12orf69	440087	2.19152	-1.0194	1.01299	1.14428	-2.49799	-1.47147	1.05086	-2.74847	-5.85493	1.50972	-2.59655
C12orf70	341346	5.02288	9.51928	11.8568	3.91562	5.07609	5.5302	4.80051	8.47654	13.0498	2.92512	5.04918
C12orf71	728858	-1.38019	-1.11686	-1.23095	1.1842	1.96004	-1.31511	1.01911	-1.53199	1.11693	2.20788	-1.6906
C12orf73	728568	1.43793	1.93819	1.96989	1.39633	1.06503	1.59031	2.81052	1.49959	2.02874	2.13726	-1.17628
C12orf74	338809	2.17551	1.37792	1.32143	-4.21311	-4.92252	-2.07674	1.59311	1.55504	1.15366	1.69452	-7.35363
C12orf75	387882	1.1515	1.7188	1.80124	3.65357	-1.10182	1.91048	9.01673	1.54107	2.44415	4.54954	1.34037
C12orf76	400073	1.17877	1.51681	1.50056	1.89198	-1.09014	1.11926	2.02669	1.37769	-1.03409	2.03332	1.45753
C12orf77	196415	2.98698	-5.99529	-5.20876	1.72699	7.28958	-1.07435	10.48	3.48648	11.652	2.89262	-5.7769
C13orf33	84935	-5.16215	-1.36004	-1.31518	-1.79573	1.21347	-2.29797	1.52303	-1.01828	-2.10439	-1.01898	1.1325
C13orf35	400165	-1.57355	11.4501	8.35665	1.57087	1.48875	3.15683	3.76307	13.1473	1.00382	3.76137	-1.07425
C14orf101	54916	-1.12928	1.37275	1.30917	1.73847	-1.52458	-1.31065	1.87005	1.28817	1.75481	2.15099	-1.15887
C14orf102	55051	-1.28323	-1.02229	-1.03378	1.49921	-1.52282	-1.46331	1.34376	1.16546	1.07157	1.50225	-1.27899
C14orf105	55195	2.57256	302.715	360.015	3.00446	-1.52625	1.22399	1.00512	64.4976	-1.14168	46.3164	5.49532
C14orf109	26175	1.22702	-1.4751	-1.45231	1.85436	-1.59816	-1.15274	1.965	1.03021	1.19543	1.45225	-1.25142
C14orf118	55668	-1.49281	1.16984	1.22576	1.70578	-1.19934	-1.4105	1.66874	1.08886	1.15713	1.4165	-1.55868
C14orf119	55017	1.23751	1.02498	1.04877	1.76951	-1.22934	1.02665	1.83195	1.37271	1.23728	1.37178	1.31936
C14orf126	112487	-1.21057	1.38283	1.45019	1.70514	-1.64038	-1.30133	1.34895	-1.02113	1.29011	1.71623	-1.33222
C14orf129	51527	1.34735	-1.88845	-1.81863	-1.15873	-1.56443	1.16853	1.68272	1.57635	1.42129	1.41066	1.05569
C14orf132	56967	-1.5447	-3.1609	-3.04414	-1.20273	-3.0276	-2.48151	2.85376	-5.85426	-4.90868	-2.18336	-1.9251
C14orf135	64430	-1.09555	1.25539	1.27761	1.69463	-1.40752	-1.43688	1.56375	1.06261	1.0491	1.86004	-1.34733
C14orf142	84520	1.47895	-1.71392	-1.66209	1.39807	-1.84307	-1.28444	1.78922	-1.17643	-1.0852	1.46054	-1.29753
C14orf149	112849	-1.87624	1.50399	1.53181	2.6802	1.06944	-1.08753	1.66099	1.25045	1.42469	1.54306	-1.52692
C14orf159	80017	-1.5935	-1.89098	-1.80661	-1.99558	-1.87868	-1.07909	1.2364	-1.46277	-1.56111	-1.3403	-1.51444
C14orf162	56936	1.91631	1.77854	2.40452	3.49575	6.10625	3.77742	2.69766	8.71204	51.9399	3.77742	-1.46587
C14orf165	414767	1.55594	1.84063	1.15559	inf	-1.38594	1.22461	-1.25825	-1.89124	-1.63318	1.94652	-2.06234
C14orf166B	145497	-3.91312	1.78905	1.47505	-2.78636	1.4098	1.25892	3.65012	-2.52345	-3.2943	1.92221	-1.74072
C14orf166	51637	1.12588	1.23775	1.27108	1.51894	-1.01582	1.17637	1.77907	1.60851	1.56133	1.38776	1.06164
C14orf167	55449	1.12746	1.03037	1.05499	1.3097	-2.20523	-1.81555	-1.20473	1.13201	1.25036	1.26974	-1.41663
C14orf169	79697	1.48002	1.40527	1.41757	1.79539	-1.33006	1.10893	2.25385	1.40988	1.47883	1.70669	-1.00659
C14orf176	643382	-1.33125	-6.42344	-6.47886	-1.2615	1.80224	3.23085	5.27567	1.83831	2.25883	-4.23105	-3.49038
C14orf177	283598	3.68011	#NAME?	#NAME?	-1.29523	inf	2.2047	inf	inf	9.62137	19.266	-5.459
C14orf178	283579	-2.15838	-1.2447	-1.19941	-1.54074	-1.13044	-1.2418	1.72736	-1.69138	-1.89313	-1.0587	-1.79088
C14orf180	400258	-36.05	-5.67028	-5.62403	-18.4198	5.52195	-7.59725	-3.63565	-1.72627	-3.98372	-2.01781	-3.68055
C14orf182	283551	1.39346	-1.13584	-1.1488	1.56305	1.87274	2.42114	1.6074	1.61893	1.4676	1.88854	-2.0259
C14orf183	196913	1.18745	-1.35023	-1.29265	7.44401	2.87943	1.05454	8.77851	1.48049	-1.63714	1.2502	-1.04277
C14orf1	11161	1.32262	1.333	1.42055	1.35865	-1.62933	-1.02987	1.35892	-1.08013	1.03657	1.37703	1.00163
C14orf21	161424	1.00187	1.09507	1.10885	1.20781	-1.29576	-1.38763	1.67998	1.22854	1.071	1.50207	-1.27675
C14orf23	387978	7.68745	9.16838	12.313	1.5918	9.14857	10.6965	inf	100.345	389.816	8.59421	-2.67285
C14orf28	122525	-1.8233	-1.56622	-1.52359	1.06357	1.11333	1.13691	1.26394	-1.18273	-1.50486	-1.18734	-1.29172
C14orf2	9556	1.28482	-1.14817	-1.10402	1.36447	-1.41427	1.08266	1.68329	1.45853	1.92863	1.22759	-1.05484
C14orf37	145407	-1.14171	1.42563	1.61306	1.46358	-12.4466	-4.55598	-1.01126	2.1058	2.53635	1.23532	-1.41627
C14orf39	317761	1.16146	-7.76953	-7.06505	-1.36224	3.97866	3.76886	inf	6.09331	8.82583	-12.3669	-1.64504
C14orf43	91748	-1.18913	-1.95921	-1.99049	1.4666	1.0211	-1.49542	-1.20454	-1.46014	-1.59165	-1.06802	-1.27601
C14orf45	80127	1.12915	-1.6485	-1.55262	-1.99253	-1.80416	1.02245	1.3136	-1.46872	-2.2173	-1.03189	-1.87921
C14orf49	161176	-7.06923	-2.2859	-2.00681	1.16815	1.26303	-4.01204	1.6679	-2.75636	-3.17724	-1.03119	-1.44816
C14orf64	388011	-2.64849	-2.51489	-2.22368	1.57923	1.14851	-1.1174	-1.17395	1.24201	-1.35937	-1.41019	-2.78654
C14orf79	122616	1.51408	2.62507	2.79319	1.55617	-1.15646	1.48324	1.88919	1.35886	1.2	1.87653	-1.09336
C14orf80	283643	2.90294	1.37842	1.42806	3.04934	1.81929	2.09252	1.76445	1.55804	2.06297	2.62405	-1.12032
C14orf93	60686	-1.10807	1.05676	1.02178	1.28855	-1.14052	-1.06729	2.90034	1.33528	1.20111	1.46098	-1.11001
C15orf23	90417	2.14339	2.24234	2.31867	2.99223	1.00617	1.08924	3.22302	2.21817	4.24746	3.56129	-1.60536
C15orf24	56851	1.08059	-1.04901	-1.01652	1.45145	-1.03137	1.1995	1.67946	1.03018	1.05296	1.3254	1.12593
C15orf26	161502	1.52271	5.23098	6.30533	-6.64858	1.66848	-1.10588	2.57095	-4.0812	-6.06829	5.77763	1.53
C15orf27	123591	-1.00315	1.40537	1.39591	-1.17564	-1.60629	-3.60591	15.6148	-1.41398	-1.44737	-1.34682	1.6567
C15orf29	79768	-1.19614	-1.08702	-1.05337	1.01998	-1.08133	1.003	1.53714	1.21045	1.58978	1.29056	-1.09499
C15orf2	23742	-2.67879	-3.56585	-3.14012	1.48861	-6.64297	-4.657	-1.0015	-1.99815	1.14417	4.23861	-1.5813
C15orf32	145858	-3.79716	-1.27703	1.06097	5.06031	1.55573	1.77741	inf	5.28786	9.933	21.5411	8.48619
C15orf33	196951	-1.07263	-1.40032	-1.25482	-1.07333	-2.0842	-2.05111	1.03771	-1.27395	1.0687	-1.8062	-1.57499
C15orf34	80072	-1.27728	-1.71776	-1.82924	-1.39544	-1.56758	1.01915	4.30752	-1.05658	-1.48338	1.79643	-1.23469
C15orf37	283687	1.18976	-1.40069	-1.40478	1.24372	-1.00556	-1.08807	1.51836	-1.63987	-1.38321	1.10056	-1.21698
C15orf38	348110	-1.15865	-1.69856	-1.70442	1.09598	-1.21642	-1.36439	2.12298	-1.16983	-1.41966	1.27648	-1.07857
C15orf39	56905	-1.09362	1.00031	-1.03663	1.10129	1.69139	-1.01165	3.30756	1.19855	1.24146	1.48647	1.29858
C15orf40	123207	-1.29714	-1.06371	-1.05597	1.28297	-1.54845	-1.19203	2.20099	1.06837	1.44292	1.21141	-1.22222
C15orf41	84529	-1.22477	1.58521	1.73077	-1.02613	-1.22662	1.03905	3.25775	1.6223	4.13117	1.18478	-1.32965
C15orf42	90381	4.3075	3.40814	3.35944	2.63667	3.53423	4.24723	23.6919	9.24798	26.642	5.15978	-1.0723
C15orf43	145645	-4.66875	1.0713	-1.04512	-2.69747	-1.60465	-1.61223	-1.59752	-1.20724	-3.87706	14.4621	-1.93271
C15orf44	81556	1.26897	1.3033	1.31079	1.62245	-1.2665	-1.26498	1.41789	1.28142	1.5328	2.08342	-1.01944
C15orf48	84419	3.76542	-5.08908	-5.00886	-2.07307	2.79283	4.24148	8.97378	8.99445	4.67936	1.27792	2.84968
C15orf50	414926	6.64335	-1.44694	-1.48418	1.92124	4.50291	-5.23612	6.75221	2.53138	-1.39525	4.48403	-3.64949
C15orf52	388115	-1.98238	-1.64264	-1.54648	-2.07754	-1.21355	1.92949	3.48615	-1.72756	-2.44005	-1.94653	-2.07531
C15orf53	400359	2.04371	1.04515	-1.03661	1.93807	8.66114	3.0337	2.40189	1.18258	-1.28686	2.76802	1.98623
C15orf54	400360	5.4611	5.84151	6.13961	2.62657	6.24652	1.18554	3.44691	2.59724	-1.91924	13.6826	1.59058
C15orf55	256646	1.06717	-1.90392	-2.12913	6.10401	3.59903	2.35069	1.3786	1.3916	8.63193	1.89738	-1.26411
C15orf56	644809	1.38525	2.44946	2.58841	-1.10647	-10.1548	-6.69167	2.66381	1.12242	-1.22585	1.38668	-1.08409
C15orf57	90416	-1.09443	-1.32628	-1.30609	1.2536	-1.21372	-1.30679	1.3624	-1.08194	-1.37329	1.11087	-1.24245
C15orf58	390637	1.42794	-1.54766	-1.59689	-1.06873	-1.45151	-1.30682	1.36641	1.46434	1.28661	1.69374	-1.26698
C15orf59	388135	2.17881	-2.58944	-2.3472	-2.30483	-2.42011	-1.90795	4.80578	-2.60904	1.32393	-3.03252	-1.58466
C15orf5	81698	-2.04178	1.13623	1.1422	2.07171	2.03032	1.43112	-1.23277	-2.48154	-2.76037	2.50044	-1.06379
C15orf60	283677	1.3166	3.41645	2.84052	4.67714	1.11845	-1.49801	89.5762	5.10796	9.74686	1.31111	1.50274
C15orf61	145853	1.09696	1.16272	1.19771	1.03932	-1.42812	-1.29701	2.10251	1.0719	1.67564	1.42694	-1.30018
C15orf62	643338	-1.31982	1.97151	1.82402	-4.05603	1.14149	1.33003	1.95077	2.02527	1.66957	-1.91262	1.72964
C15orf63	25764	1.73996	1.60697	1.63179	1.44254	1.27914	1.3438	1.81198	1.60931	1.88297	2.1149	-1.04302
C16orf11	146325	13.0351	13.4805	13.7313	1.84094	-194.687	-50.1322	inf	5.95478	27.6952	2.40939	13.3254
C16orf13	84326	2.19596	1.92278	1.90065	1.90223	2.5668	1.81515	1.6747	1.85236	1.4639	1.50501	1.28745
C16orf3	750	-1.05509	3.12489	3.31962	1.10769	2.41466	1.90294	2.86813	1.36276	-1.08543	3.30125	-1.54916
C16orf42	115939	1.50401	1.09565	1.08605	1.5878	1.14743	1.31287	1.98142	1.3294	1.29868	1.04118	1.12684
C16orf45	89927	1.04648	-2.5029	-2.23045	-1.81549	-2.27211	-1.16762	-1.06407	-1.23799	-2.00473	-2.06979	3.08436
C16orf46	123775	-1.0296	2.44541	2.49957	1.07654	-1.43307	1.30629	1.13056	1.04088	-1.1811	1.97185	-2.20765
C16orf48	84080	-1.04536	1.6489	1.68097	1.29472	1.32947	2.39491	1.58866	-1.24745	-1.69001	1.01889	-1.20566
C16orf52	730094	-1.25017	1.24197	1.26119	1.39947	-1.15277	-1.13093	1.21273	-1.20967	-1.1722	1.34414	-1.37152
C16orf53	79447	2.25002	1.46942	1.47373	1.63949	1.10549	1.20377	2.11116	1.51163	1.69522	1.778	-1.11663
C16orf54	283897	-1.12984	-2.32126	-2.32378	1.96031	3.23601	1.13072	-1.13338	-1.91586	-3.82254	-1.458	-2.49844
C16orf55	124045	1.77329	2.61252	2.45554	2.12339	1.02942	1.73161	2.31085	1.1444	1.26999	2.39796	-1.2383
C16orf57	79650	1.06159	1.07669	1.06941	3.00378	-1.19895	1.38995	1.57113	1.74574	1.61963	1.57274	1.41069
C16orf58	64755	1.50612	1.34851	1.33287	1.33002	1.00667	1.18873	1.3038	1.55415	1.126	1.50171	-1.08346
C16orf59	80178	7.31941	3.32403	3.37437	5.19497	1.94744	5.31178	13.5585	15.8913	20.0147	5.40628	2.17949
C16orf5	29965	-1.70264	-2.04007	-2.12225	1.02335	-1.31799	-1.08782	1.55315	-1.17208	-1.35524	-1.30595	-1.24008
C16orf62	57020	1.02471	-2.28312	-2.36715	1.05182	-1.24568	1.13183	1.14979	1.13411	-1.28913	-1.16095	1.00124
C16orf70	80262	1.21611	1.3621	1.33327	1.34772	1.07342	1.08902	-1.039	1.45609	1.72477	1.58046	-1.09551
C16orf71	146562	3.62928	1.04612	1.07149	-4.28563	-1.58159	1.53249	2.21046	-2.78695	-4.97667	1.41161	-2.53419
C16orf72	29035	1.161	-1.09254	-1.13071	1.60962	-1.12701	-1.08087	1.14983	1.02463	1.12662	1.25914	-1.41968
C16orf73	254528	5.2408	-1.23925	1.1728	34.7321	-1.41199	-1.47533	11.553	23.7008	47.0659	4.94041	-1.14556
C16orf74	404550	1.74127	1.02826	1.00085	4.61783	7.37299	3.79472	3.83141	3.26767	9.55367	1.07296	-1.03331
C16orf78	123970	1.15263	1.09056	inf	1.30808	1.30961	-1.37275	inf	-1.1263	-4.35177	2.13221	-2.65268
C16orf79	283870	2.76174	2.14661	2.02027	2.69998	2.24243	1.76173	5.62555	1.89041	1.58481	2.09342	1.27888
C16orf7	9605	1.14061	-1.18408	-1.20945	-1.18127	-1.00574	1.47482	1.7224	1.6685	1.34354	1.08748	1.14528
C16orf80	29105	-1.14382	1.50908	1.5501	1.77197	1.01935	1.15645	1.2039	-1.00685	1.20475	1.40412	-1.22565
C16orf82	162083	-5.1145	-1.67101	-1.67292	1.50613	10.3602	9.22284	-1.7731	1.8123	2.72564	2.44815	4.19223
C16orf86	388284	-1.85507	-1.55593	-1.47669	-1.12026	-1.23081	1.29514	1.19752	-1.84732	-2.06256	-1.71672	-2.4434
C16orf87	388272	1.25574	1.41757	1.3711	1.80315	-1.42996	-1.25739	-1.0717	1.74803	1.87621	1.60315	-1.19494
C16orf88	400506	2.13553	1.83919	1.75574	1.70175	1.27324	1.77921	2.37327	2.60396	2.87934	2.96683	1.63294
C16orf89	146556	-1.99874	-11.2349	-9.83189	-26.0331	-9.17416	-13.3381	40.6953	-1.0378	-14.0673	-7.20712	-1.63812
C16orf90	646174	2.1673	-1.1287	1.72872	11.6806	-2.12819	-2.82562	2.98719	1.31494	2.05074	1.52158	-2.07883
C16orf91	283951	1.92812	1.50505	1.51598	1.57526	-1.03372	1.16499	2.10698	1.72806	1.69224	1.48475	-1.11433
C16orf92	146378	3.04813	10.6362	8.36735	-2.55202	14.5893	2.64435	inf	1.44922	4.38038	6.25807	61.7578
C16orf93	90835	3.17859	2.09896	2.18335	1.24467	1.49059	2.73031	3.60892	1.35745	-1.1699	2.1537	1.03711
C17orf100	388327	-1.26737	1.26106	1.2884	1.51969	-1.05798	1.92464	1.09941	1.68134	2.16724	1.25351	1.03498
C17orf101	79701	1.12884	1.04806	1.07179	1.30716	-1.00352	1.22952	1.74845	1.29011	-1.07637	1.3381	1.03937
C17orf102	400591	5.09347	1.05297	1.18716	1.08508	1.02233	-1.66824	-1.9002	3.68139	1.72167	2.11079	1.42232
C17orf103	256302	-3.33309	-1.18904	-1.1938	-1.60539	-1.56934	-1.13349	1.80321	-2.11546	-2.71857	-1.16924	-1.37319
C17orf104	284071	1.94781	1.72115	1.66599	1.91845	-4.28394	-2.98283	1.8969	8.14768	4.79195	3.00385	-1.10801
C17orf105	284067	-1.85572	-2.02139	-1.76598	2.67711	-4.2144	-3.45927	4.92412	-3.57164	-1.87633	1.8593	-1.99582
C17orf107	100130311	-1.4479	-1.33947	-1.27735	-1.10207	2.10759	1.53274	1.25207	1.43266	-1.02172	-1.07499	2.52574
C17orf108	201229	-1.62719	-1.35384	-1.26602	-1.57555	-2.1003	-1.32861	1.43857	-1.68557	-1.8418	-1.29451	-1.44699
C17orf28	283987	2.76394	1.4085	1.45176	-2.20301	-1.61252	-1.19809	3.62657	2.17484	-1.63392	1.79553	-1.12652
C17orf39	79018	-1.73671	-1.03932	-1.00386	1.18317	-1.06676	-1.19234	1.29849	-1.33755	1.04009	-1.40985	-1.11578
C17orf47	284083	1.10897	1.52022	1.33254	2.5738	1.0184	-1.48575	2.50199	3.00776	1.61742	3.9686	-2.13418
C17orf48	56985	-1.71702	-1.17291	-1.10504	1.26426	1.08961	-1.00683	1.48225	-1.1125	-1.13929	1.0088	-1.19816
C17orf49	124944	1.27476	1.32735	1.34806	1.67972	1.15428	1.40992	1.94569	1.06265	1.10567	1.4279	1.23375
C17orf50	146853	-1.06009	-1.37079	-1.17659	1.16447	-3.03007	2.40067	7.29144	1.27331	-2.60223	2.25803	1.12199
C17orf51	339263	-2.3282	1.43033	1.52761	2.30898	-1.97187	1.14123	1.3165	1.07812	1.19027	1.11171	-1.24856
C17orf53	78995	1.59142	2.98899	3.15119	3.26399	2.67881	3.09719	7.46706	8.4124	13.1658	4.29416	1.76266
C17orf56	146705	1.26329	1.54372	1.48415	2.04101	2.01304	1.81534	2.9003	1.74746	1.84018	2.06029	1.0153
C17orf57	124989	-1.83424	1.84883	1.82358	1.2713	1.18732	2.19862	2.23659	2.35318	1.32975	2.12591	1.55549
C17orf58	284018	1.21283	-1.00121	1.02751	1.14746	1.23522	1.40612	2.64166	2.18826	2.04654	1.33143	1.21789
C17orf59	54785	1.14393	-1.66258	-1.70106	1.14467	-1.0542	1.13812	2.39468	-1.11712	-1.15348	-1.08454	-1.03388
C17orf61	254863	-1.19038	-1.29035	-1.26335	1.15615	-1.08837	1.27742	-1.02995	1.40443	1.30483	-1.41764	1.11916
C17orf62	79415	1.7498	1.02604	1.00042	1.8774	1.75823	2.27766	2.19673	1.79567	1.22411	1.53221	1.31195
C17orf63	55731	1.2777	1.07054	1.04057	1.28539	-1.065	1.45544	2.05474	1.80076	1.20487	1.67015	1.18131
C17orf64	124773	1.33937	2.06032	2.14922	2.04879	3.0433	4.20327	4.56728	1.54445	-1.10647	6.62723	-1.63294
C17orf65	339201	1.41272	1.36003	1.34784	1.8251	1.20158	1.50782	3.17203	1.79221	1.56032	1.66384	1.03958
C17orf66	256957	1.31644	1.17595	1.24497	2.03149	20.4048	2.51167	3.6115	1.80827	-1.29142	3.96687	1.04058
C17orf67	339210	1.0638	1.26255	1.2348	2.8726	1.40982	1.94497	2.29815	1.23758	1.00858	1.27753	-1.33908
C17orf69	147081	-1.37341	1.55759	1.52733	1.10394	1.2204	1.92443	2.81883	1.37579	1.87513	1.00787	-1.42461
C17orf70	80233	1.70379	1.47352	1.46305	1.46535	1.55379	1.73348	1.8718	1.80163	1.59431	1.89764	1.14355
C17orf72	92340	1.44624	1.11367	1.1386	-4.35541	1.24772	2.54253	2.56495	-1.7862	-5.2503	1.74706	1.75994
C17orf74	201243	2.06569	3.66645	2.09604	2.46591	36.2164	5.35214	inf	6.22005	4.68025	3.04652	-1.75673
C17orf75	64149	1.4194	1.72746	1.84646	1.87075	-1.59511	1.14216	2.45763	1.81411	2.35944	1.89886	-1.12496
C17orf77	146723	1.27722	13.5633	18.397	4.73599	81.7246	4.13566	6.94084	19.0116	12.2617	6.98578	1.09554
C17orf78	284099	1.17213	-3.23183	-3.74457	1.40656	-1.16687	-2.39689	4.79595	3.71769	1.36779	-8.69903	-1.33998
C17orf79	55352	1.00161	1.48919	1.57975	1.6658	-1.17971	1.12545	1.66506	1.06673	1.14976	1.25949	-1.19991
C17orf80	55028	1.0562	1.22579	1.26437	1.43369	-1.12854	1.14649	2.41199	1.37066	1.44552	1.39139	-1.51073
C17orf81	23587	-1.11972	-1.28009	-1.24773	1.42778	-1.08147	1.04697	1.39506	1.02158	1.22741	1.28127	-1.19498
C17orf82	388407	1.87849	2.56852	2.78863	2.36972	1.32615	1.14533	13.179	-1.64833	1.19444	3.08044	1.41394
C17orf85	55421	-1.22637	-1.1305	-1.09628	1.53367	-1.06156	-1.01046	1.28528	1.03672	1.0514	1.57993	-1.20874
C17orf89	284184	1.36229	1.65655	1.71446	1.44857	-1.03235	1.57399	2.24948	1.96424	2.48878	1.62418	1.19399
C17orf90	339229	2.01397	1.55063	1.51684	1.96267	-1.09608	1.88216	3.17282	2.01166	2.1926	1.62402	1.18544
C17orf96	100170841	1.80573	13.8079	13.7353	2.41899	1.98717	2.46209	1.58043	2.82109	4.22876	4.32907	2.42967
C17orf97	400566	1.43908	-1.73444	-1.75424	-1.52539	-1.37457	2.17858	1.33604	-1.48885	-1.79284	1.24769	-1.27095
C17orf98	388381	-1.51021	1.31712	1.82752	-1.07507	1.85833	3.0665	-1.1369	1.75031	-1.07451	2.09333	1.00821
C17orf99	100141515	1.12435	3.98971	4.31475	3.81193	2.26224	3.07862	10.065	1.4195	12.4326	2.78997	-1.67981
C18orf1	753	1.16213	-1.28251	-1.26818	1.47097	1.44119	-2.64481	1.13868	-1.42015	-1.77513	-1.09313	1.46346
C18orf21	83608	1.18748	1.15448	1.21518	1.52855	1.39401	1.18166	2.13621	1.42955	1.56206	1.34556	1.0682
C18orf25	147339	-1.00651	-1.162	-1.11908	-1.23099	-1.12841	-1.26092	1.54796	1.03042	1.28771	1.00855	-1.23265
C18orf26	284254	4.23889	1.50328	1.40613	-21.6664	2.79436	3.72012	15.1748	5.95253	64.8739	-20.0738	-1.35575
C18orf32	497661	1.48184	-1.70286	-1.56903	1.03944	-1.42483	-1.32597	1.6699	1.04508	-1.24882	1.10614	-1.03661
C18orf34	374864	-8.55622	-3.24102	-3.08728	-4.45273	-3.41896	-5.84308	1.40891	-5.21035	-5.06285	-1.63326	-2.29603
C18orf54	162681	1.3233	1.2082	1.20348	3.79231	1.49429	1.61795	4.96003	1.29407	2.4144	3.31036	-1.20124
C18orf56	494514	4.91975	1.05161	1.14849	3.19914	1.32185	1.40468	3.69658	6.62817	10.886	2.4907	4.52079
C18orf62	284274	-1.96641	-1.04171	-1.54771	inf	-1.9659	1.83584	inf	9.59716	8.67741	11.7813	1.2065
C18orf8	29919	1.13318	-1.2748	-1.27021	1.52544	1.04959	-1.00105	1.25254	-1.08162	1.05073	1.5969	-1.08891
C19orf10	56005	1.81621	1.36673	1.39763	1.84735	2.11736	1.56695	2.03076	1.57012	1.16526	1.52886	1.06917
C19orf12	83636	-2.45514	1.03538	-1.04702	1.11585	1.10636	-1.41822	1.20884	1.20799	1.25665	1.87419	-1.05859
C19orf18	147685	1.16245	1.34054	1.31256	-1.00392	1.43119	-1.31646	2.37419	1.6842	-1.20546	1.6939	-1.03785
C19orf21	126353	9.30065	-1.7802	-1.91534	1.81632	-3.71911	1.11879	15.619	1.64496	-2.17274	1.52393	11.0224
C19orf24	55009	1.84871	1.79136	1.74049	1.53804	1.57026	1.35753	1.7186	1.56855	1.70498	1.71698	1.22084
C19orf25	148223	1.48322	1.20154	1.15477	1.62011	-1.04186	-1.20638	2.77335	1.08626	1.2313	1.26234	-1.09375
C19orf26	255057	2.63312	5.46607	5.95244	1.65005	-3.43236	-4.97241	1.67375	6.10014	3.71762	1.33656	4.36737
C19orf29	58509	1.17631	1.29057	1.26685	1.70759	1.18149	1.1218	2.08075	1.20711	1.48164	1.5308	-1.0837
C19orf33	64073	6.42701	-1.60109	-1.6187	1.00741	4.64482	9.67492	12.2367	1.36355	-1.00189	1.08939	5.36842
C19orf35	374872	1.00009	-1.90828	-2.02667	1.78671	2.47419	1.46468	-1.11439	-2.25241	-4.07329	1.60106	1.10779
C19orf38	255809	1.74623	-1.42887	-1.3779	1.84462	2.31416	1.96594	1.05431	-2.09017	-3.33044	1.2092	-1.20403
C19orf40	91442	2.13455	1.74793	1.75698	2.90199	1.28971	2.12381	4.69252	2.88972	3.95595	2.83839	1.08869
C19orf42	79086	1.11884	-1.00325	1.01509	1.41692	-1.06797	-1.13812	1.60837	-1.05074	1.1059	1.1518	-1.16442
C19orf43	79002	1.22705	1.11872	1.10648	1.51541	1.17344	1.03313	1.24805	-1.05898	1.15222	1.09469	1.06187
C19orf44	84167	-1.09896	1.45025	1.46071	1.25102	1.1345	1.06856	2.36263	-1.02796	-1.24999	1.26239	-1.29452
C19orf45	374877	4.98001	6.2892	6.42081	2.59193	-2.29309	2.24424	9.16237	8.53183	5.33437	3.55507	1.05154
C19orf46	163183	2.29796	3.19639	3.11094	-1.26722	-8.15551	-1.10602	2.45876	1.96938	-1.07426	2.68788	1.00707
C19orf47	126526	1.30421	1.2661	1.24927	1.12766	-1.03357	-1.18774	1.95986	1.3007	1.9388	1.45773	-1.05649
C19orf48	84798	2.00868	3.51427	3.65296	2.33592	1.72473	1.65599	4.09387	2.93636	4.75438	3.20185	-1.19862
C19orf52	90580	1.47956	1.28841	1.26939	1.58378	-1.26539	-1.03917	2.19588	1.5004	2.00092	1.38557	1.29666
C19orf53	28974	1.58572	1.76395	1.78341	1.52689	1.17291	1.46925	2.32523	1.35328	1.56275	1.27398	1.40006
C19orf54	284325	1.27366	1.14439	1.11498	1.68229	1.21546	1.46064	2.37954	-1.2385	1.06631	1.98744	-1.32689
C19orf55	148137	1.36154	1.46974	1.4889	1.74889	1.33535	1.23594	3.30922	1.44953	1.55131	1.76062	-1.3225
C19orf57	79173	1.48654	1.31168	1.32074	1.74793	1.37549	-1.07637	4.42689	3.1239	3.40192	2.31541	1.62166
C19orf59	199675	3.07228	7.4325	7.28862	2.26186	4.73637	7.09343	1.37311	-15.0155	-40.0565	6.55451	23.9852
C19orf60	55049	1.53851	1.59597	1.5823	1.74246	1.53608	1.37209	1.91139	1.18988	1.6064	1.48203	1.10992
C19orf63	284361	1.76291	1.23775	1.24004	1.63256	-1.27829	-1.03743	1.57235	1.35165	1.32485	1.45269	1.12778
C19orf66	55337	1.14716	1.33283	1.30278	2.51295	1.41475	1.31327	-1.02608	1.07647	-1.27325	1.49034	1.16386
C19orf69	100170765	-5.88305	-1.21084	-1.39707	-1.00382	-13.304	-12.1563	149.532	-4.0848	-5.98104	-9.36916	-1.46974
C19orf6	91304	1.25243	1.15744	1.14939	1.62488	1.27271	1.01759	1.57455	1.15969	1.31766	1.33192	1.02701
C19orf70	125988	1.27466	-1.02747	-1.01786	-1.02018	1.10736	1.17377	1.81889	1.13366	1.09652	-1.04836	1.03292
C19orf71	100128569	1.35533	1.72877	1.63757	1.83344	1.08379	-1.3688	2.90255	1.30142	1.04799	1.73101	-1.77401
C19orf73	55150	1.43749	1.36914	1.34867	1.40688	-1.94638	1.00427	1.66328	1.55649	2.76031	1.76568	-1.26023
C19orf75	284369	-1.96208	-1.87952	-1.49771	-1.06474	11.1591	13.1133	9.41654	1.32355	5.98793	2.95941	-1.20237
C19orf76	199800	-1.73621	1.62367	1.64488	-1.06091	1.5842	1.41089	2.48133	-1.38414	-1.0212	1.39234	-1.02174
C19orf77	284422	-1.73394	-1.18762	-1.32696	8.41669	-2.62067	-3.93463	-1.96686	35.3113	11.2075	-2.9112	14.7741
C1D	10438	1.16496	1.00858	1.03371	1.44633	-1.53168	-1.41988	1.20832	-1.03981	1.29592	1.35154	-1.15659
C1GALT1C1	29071	1.18953	1.4081	1.39762	1.14599	-1.30343	-1.18791	1.57278	1.52254	1.0195	2.03349	1.05002
C1GALT1	56913	-1.02345	1.79499	1.85975	1.15605	-1.20884	1.14117	1.8808	2.0741	1.31892	2.64643	-1.53696
C1QA	712	-1.14109	-2.38155	-2.47121	2.04343	5.59439	3.42309	-1.18733	-2.68695	-3.729	1.5162	1.29507
C1QBP	708	1.31591	1.38908	1.43807	1.39468	-1.30101	1.28479	1.45113	1.6641	2.30636	2.01257	-1.00814
C1QB	713	-1.02508	-2.30392	-2.39585	2.26518	6.99926	4.57807	-1.30788	-2.72395	-3.79837	1.84277	1.35914
C1QC	714	1.06008	-2.34375	-2.46323	2.17738	6.34506	3.86886	-1.2813	-1.95561	-2.74597	1.82273	1.40786
C1QL1	10882	2.15639	-2.92832	-2.92227	10.9309	11.2462	1.64495	25.317	7.45464	19.6457	-3.79623	16.5468
C1QL2	165257	-1.25297	-2.08358	-1.51379	2.7532	7.01465	4.19658	-1.28352	39.6053	4.38184	10.4888	2.02818
C1QL3	389941	-1.44301	-1.40392	-1.34626	-1.24663	1.03481	-1.17179	1.21734	-1.11239	-2.22669	1.58287	1.20563
C1QL4	338761	2.02119	4.63311	3.78631	14.3186	8.3114	6.78555	40.6924	17.3909	64.2838	7.367	2.01937
C1QTNF1	114897	-3.30512	1.93907	2.05472	1.9669	2.04859	1.16972	-1.55787	-1.43495	-1.14151	1.40551	1.21434
C1QTNF2	114898	-1.87664	-3.21794	-3.09748	-1.07022	1.27612	-3.74205	1.90778	-3.35837	-5.74556	-2.87606	-2.18358
C1QTNF3	114899	1.74386	-2.04183	-1.82915	-1.00967	1.67819	5.44974	28.8692	1.90318	1.55205	-1.86591	-1.42662
C1QTNF4	114900	-1.36631	-2.60937	-2.30673	1.36325	-1.0776	-1.32562	2.54588	1.0327	1.17615	-2.90893	-1.9281
C1QTNF6	114904	4.56862	1.98221	1.98219	8.76567	4.57836	2.87695	3.93522	5.26398	4.7083	6.40199	1.76589
C1QTNF7	114905	-6.06529	-5.36273	-4.93093	-7.8796	-3.39515	-8.28527	-1.32158	-5.26845	-15.6333	-3.0933	-4.71171
C1QTNF8	390664	26.949	11.6843	10.9747	-1.13862	3.03433	4.86161	5.86041	1.06439	-1.33062	16.4831	1.07055
C1QTNF9B	387911	-5.98194	-2.25927	-1.95262	-1.0605	2.31844	-1.29673	3.02202	1.98695	1.56417	-1.02575	1.26973
C1QTNF9	338872	-8.29662	-3.02277	-2.76237	-3.13435	-1.53217	-4.46464	1.35278	-1.22033	-2.44494	-1.17155	-1.83913
C1RL	51279	-1.47831	-1.07951	-1.06388	1.28042	1.43911	2.19019	-2.10421	1.04505	-1.29645	1.52278	1.13597
C1R	715	-1.95648	-1.21617	-1.21303	1.54599	1.78473	1.197	-2.33093	1.08797	-1.12955	1.33476	-2.09054
C1S	716	-1.76936	-1.23282	-1.19743	2.05255	2.18639	1.62491	-1.73562	1.25313	1.01369	1.44952	-2.47843
C1orf100	200159	1.36826	-1.80269	-2.56671	2.26614	-2.44511	inf	inf	1.93077	3.17245	2.06218	1.12164
C1orf101	257044	-1.14909	1.07181	1.13567	-1.02415	-1.93384	-1.65055	2.00314	-1.22095	-1.59192	1.53323	-1.78698
C1orf105	92346	42.7655	10.9031	8.51428	-3.03677	-1.38314	1.05611	3.98378	17.0105	8.95018	5.23754	1.83128
C1orf106	55765	2.8888	-1.52684	-1.60521	1.34961	-1.22432	1.22439	10.9971	4.87201	4.41686	2.06918	16.3276
C1orf109	54955	-1.03523	2.10436	2.09868	1.73545	-1.27694	-1.31099	2.18271	1.67226	2.18908	2.06732	-1.28979
C1orf110	339512	-1.25019	15.9017	11.2283	1.39471	-1.7073	-8.26927	2.39848	-1.41332	4.55418	4.91839	-1.24758
C1orf111	284680	1.20817	1.1684	1.11381	1.66818	-4.30324	-1.80057	4.62176	1.95458	-1.16401	2.47856	3.2643
C1orf112	55732	2.4838	2.56014	2.59005	3.09506	1.40892	1.24055	3.72697	4.05253	5.27141	4.57709	1.12245
C1orf114	57821	1.32234	-1.70181	-1.27289	-4.74273	-12.9276	-1.69127	2.48645	-2.52385	-4.38933	1.31017	1.9981
C1orf115	79762	-2.43225	-4.48092	-4.74344	-1.83286	-1.88702	-2.2711	1.15737	-2.80552	-2.67957	-2.01975	2.35137
C1orf116	79098	-1.1589	1.30275	1.30972	-2.10148	-8.33919	-1.84709	4.37254	-1.48513	-7.2119	-1.33716	2.61834
C1orf122	127687	1.90156	1.09131	1.10527	1.4131	-1.53061	-1.20888	1.95985	1.82502	1.67992	1.19277	1.2442
C1orf123	54987	-1.41057	-1.21854	-1.17399	1.17676	1.19455	-1.0171	1.46303	-1.09347	-1.50366	-1.18261	-1.07938
C1orf124	83932	1.26975	1.27224	1.27752	1.44791	-1.26733	-1.32844	2.17444	1.45636	1.88017	2.08179	-1.43903
C1orf126	200197	-1.44442	1.71387	1.63941	-1.82206	1.39744	1.78087	4.22736	3.63075	1.83812	1.46178	1.84686
C1orf127	148345	2.14781	-1.11567	-1.11376	-4.58487	8.17684	8.72694	2.28672	1.87926	-1.10324	1.62205	-1.05633
C1orf129	80133	3.56267	inf	inf	-3.87764	2.70117	1.79095	2.94974	-6.25912	-12.2257	2.11596	-1.13752
C1orf130	400746	-2.1877	1.25995	1.17208	-9.58734	-4.43448	1.12315	1.33434	-1.27609	-5.14719	1.33893	2.06497
C1orf131	128061	1.71711	1.30723	1.28951	1.85096	1.14944	1.20257	2.69662	2.09539	2.87029	2.53138	-1.30048
C1orf133	574036	-1.4089	-3.01773	-2.52941	-1.07083	-1.22644	2.45244	13.2673	-1.02757	-1.098	-2.43861	-1.12226
C1orf135	79000	4.59035	5.19577	5.2143	4.71822	-1.43332	-1.06599	3.68725	6.07272	14.901	5.14515	1.20637
C1orf141	400757	inf	-1.18233	-1.2056	-34.3238	-8.46282	-1.68142	inf	-3.94591	-8.75146	6.03558	-1.56906
C1orf144	26099	-1.01328	-1.08151	-1.06024	1.45905	-1.07793	-1.29303	1.71192	1.08669	1.09642	1.23385	1.01727
C1orf146	388649	-1.16397	3.10172	2.74544	8.11095	3.12313	-2.17999	1.46495	-1.41734	-1.49246	3.68182	1.06891
C1orf150	148823	-1.824	-5.76938	-5.48828	-1.45822	2.04532	3.05746	5.02863	-3.13054	-6.3279	-1.51821	1.0675
C1orf158	93190	11.1113	inf	inf	-32.0898	-2.956	3.2072	305.58	-4.40779	-10.4884	6.26328	-6.76496
C1orf159	54991	1.8904	1.60411	1.55745	2.19735	1.53578	1.54868	2.72095	2.03547	2.10706	2.12761	1.03413
C1orf162	128346	1.0984	-1.478	-1.48504	1.32538	4.75279	2.67962	-1.5434	-3.41827	-5.90118	1.83811	1.02938
C1orf168	199920	1.30651	1.09097	1.15671	-5.70338	-6.73476	-14.1411	-1.3431	-2.02075	-8.58627	1.98964	-1.89381
C1orf170	84808	1.23563	10.3461	9.91089	-4.64549	8.77228	3.47877	4.4345	9.32064	7.03156	-1.02271	8.688
C1orf172	126695	1.53369	-1.1091	-1.1529	1.38233	-4.7428	-1.68394	1.54652	1.84238	2.1088	1.52777	1.08918
C1orf173	127254	1.11274	-3.10862	-2.26081	-24.5204	2.08459	2.35773	-1.41562	-3.94306	-8.34794	3.48871	2.29975
C1orf174	339448	1.09758	1.37299	1.41089	1.66679	1.00695	-1.0423	1.64093	1.39159	1.60592	1.77495	-1.15235
C1orf177	163747	1.15221	-6.36308	-7.26231	-3.82732	1.24182	-1.0163	2.10624	1.16473	2.98663	-10.1989	-1.26598
C1orf180	439927	3.26742	8.34363	7.06457	7.05225	-37.6828	-2.18929	18.5648	3.30966	7.94565	3.3149	3.51137
C1orf182	128229	4.06129	4.44617	4.49079	1.84737	-1.8677	1.87465	5.50482	15.0081	11.2259	5.99327	-1.02623
C1orf185	284546	-8.25407	-1.44033	inf	-1.2991	3.06944	-1.00161	1.94542	9.73451	5.53026	1.77148	1.65133
C1orf186	440712	2.5972	-6.70141	-6.61613	6.18248	3.74705	12.6794	6.26714	-2.78419	-3.31504	-1.67569	1.01207
C1orf187	374946	2.98412	1.91687	1.625	2.41094	-1.32924	-2.36824	8.84661	2.2897	3.65626	6.67879	13.5657
C1orf189	388701	5.49807	-1.49573	-1.50325	-21.0594	1.61404	-1.49431	1.93934	-3.96679	-8.01922	2.5444	1.24516
C1orf192	257177	1.61571	-1.165	-1.11988	-6.70963	-2.40734	-1.11294	1.6938	-2.34376	-5.49311	1.40931	-3.11388
C1orf194	127003	10.469	-1.10257	1.09005	-35.3734	-1.68281	3.79353	34.0583	-4.44365	-9.91077	1.59689	-3.22797
C1orf198	84886	-1.09001	1.76099	1.90466	1.20909	-1.25732	-1.22091	3.50642	-2.17375	-3.12628	1.38508	-1.38762
[truncated: 17,500 more rows]
