# Supplementary material for: Integrative Analysis Reveals Comprehensive Altered Metabolic Genes Linking with Tumor Epigenetics Modification in Pan-Cancer
Source: Biomed Res Int. 2019 Nov 7;2019:6706354. doi: 10.1155/2019/6706354 (PMC6881592; doi:10.1155/2019/6706354)
Supplement: Supplementary Materials — Supplementary Table 1: the number of sample information and differential expression genes for 11 different cancer types and 5 GEO data projects. Supplementary Table 2: the differential expression gene list and its fold change in 11 cancer types compared with normal samples. Supplementary Table 3: the metabolic genes and the differential expression of metabolic genes. Supplementary Table 4: the function annotations of MDEGs. Supplementary Table 5: the critical different expression genes related to epigenetic modification in the specific types of cancer. Supplementary Table 6: the genes with different expression and methylation influenced by DNMT3B expression. Supplementary Table 7: gene ontology analysis of differential expression and methylation genes. Supplementary Table 8: the correlation between expression and methylation of specific genes. Supplementary Table 9: the oncogene/tumor suppressor mutation frequency and the sample size with mutation across cancer types. Supplementary Table 10: the differential expression MDEGs in mutated samples compared with non-mutated samples across cancer types. Supplementary Table 11: the pathway enrichment analysis in each mutation group. Supplementary Figure 1: relationships among metabolic pathways, cancer types, and oncogene/suppressor gene mutations. [file 6706354.f1.zip › 6706354.f1/Supplementary Table3.xlsx]

## Sheet: Table 3-1
Table 3-1 The metabolic genes list
GENE ID	GENE Symbols
2	A2M
9	NAT1
10	NAT2
15	AANAT
18	ABAT
19	ABCA1
30	ACAA1
31	ACACA
32	ACACB
33	ACADL
34	ACADM
35	ACADS
36	ACADSB
37	ACADVL
38	ACAT1
39	ACAT2
43	ACHE
47	ACLY
48	ACO1
50	ACO2
51	ACOX1
52	ACP1
53	ACP2
54	ACP5
55	ACPP
60	ACTB
95	ACY1
97	ACYP1
98	ACYP2
100	ADA
107	ADCY1
108	ADCY2
109	ADCY3
111	ADCY5
112	ADCY6
113	ADCY7
114	ADCY8
115	ADCY9
123	PLIN2
124	ADH1A
125	ADH1B
126	ADH1C
127	ADH4
128	ADH5
130	ADH6
131	ADH7
132	ADK
150	ADRA2A
158	ADSL
159	ADSS
176	ACAN
178	AGL
183	AGT
189	AGXT
191	AHCY
203	AK1
204	AK2
205	AK4
207	AKT1
210	ALAD
211	ALAS1
212	ALAS2
213	ALB
215	ABCD1
216	ALDH1A1
217	ALDH2
218	ALDH3A1
219	ALDH1B1
220	ALDH1A3
221	ALDH3B1
222	ALDH3B2
223	ALDH9A1
224	ALDH3A2
226	ALDOA
229	ALDOB
230	ALDOC
231	AKR1B1
239	ALOX12
240	ALOX5
242	ALOX12B
246	ALOX15
247	ALOX15B
262	AMD1
270	AMPD1
271	AMPD2
272	AMPD3
275	AMT
276	AMY1A
277	AMY1B
278	AMY1C
279	AMY2A
280	AMY2B
290	ANPEP
291	SLC25A4
292	SLC25A5
293	SLC25A6
314	AOC2
316	AOX1
318	NUDT2
335	APOA1
336	APOA2
338	APOB
344	APOC2
345	APOC3
348	APOE
353	APRT
375	ARF1
377	ARF3
383	ARG1
384	ARG2
406	ARNTL
410	ARSA
411	ARSB
412	STS
415	ARSE
416	ARSF
427	ASAH1
435	ASL
438	ASMT
440	ASNS
443	ASPA
445	ASS1
471	ATIC
498	ATP5A1
501	ALDH7A1
506	ATP5B
516	ATP5G1
549	AUH
570	BAAT
586	BCAT1
587	BCAT2
593	BCKDHA
594	BCKDHB
617	BCS1L
622	BDH1
633	BGN
635	BHMT
644	BLVRA
645	BLVRB
649	BMP1
661	POLR3D
669	BPGM
677	ZFP36L1
682	BSG
683	BST1
759	CA1
760	CA2
761	CA3
762	CA4
763	CA5A
765	CA6
766	CA7
767	CA8
768	CA9
771	CA12
773	CACNA1A
783	CACNB2
784	CACNB3
788	SLC25A20
790	CAD
801	CALM1
805	CALM2
808	CALM3
811	CALR
821	CANX
847	CAT
857	CAV1
873	CBR1
874	CBR3
875	CBS
883	CCBL1
892	CCNC
908	CCT6A
948	CD36
949	SCARB1
952	CD38
953	ENTPD1
954	ENTPD2
955	ENTPD6
956	ENTPD3
957	ENTPD5
960	CD44
978	CDA
1024	CDK8
1036	CDO1
1040	CDS1
1045	CDX2
1056	CEL
1066	CES1
1071	CETP
1081	CGA
1082	CGB
1103	CHAT
1109	AKR1C4
1118	CHIT1
1119	CHKA
1120	CHKB
1131	CHRM3
1152	CKB
1155	TBCB
1158	CKM
1159	CKMT1B
1160	CKMT2
1207	CLNS1A
1208	CLPS
1312	COMT
1352	COX10
1355	COX15
1356	CP
1371	CPOX
1373	CPS1
1374	CPT1A
1375	CPT1B
1376	CPT2
1384	CRAT
1387	CREBBP
1431	CS
1432	MAPK14
1455	CSNK1G2
1462	VCAN
1463	NCAN
1464	CSPG4
1468	SLC25A10
1490	CTGF
1491	CTH
1499	CTNNB1
1503	CTPS1
1537	CYC1
1603	DAD1
1606	DGKA
1607	DGKB
1608	DGKG
1609	DGKQ
1610	DAO
1621	DBH
1629	DBT
1632	ECI1
1633	DCK
1634	DCN
1635	DCTD
1638	DCT
1644	DDC
1645	AKR1C1
1646	AKR1C2
1650	DDOST
1656	DDX6
1666	DECR1
1678	TIMM8A
1716	DGUOK
1717	DHCR7
1718	DHCR24
1719	DHFR
1723	DHODH
1725	DHPS
1728	NQO1
1733	DIO1
1734	DIO2
1735	DIO3
1737	DLAT
1738	DLD
1743	DLST
1757	SARDH
1786	DNMT1
1787	TRDMT1
1788	DNMT3A
1789	DNMT3B
1798	DPAGT1
1803	DPP4
1806	DPYD
1807	DPYS
1841	DTYMK
1854	DUT
1890	TYMP
1892	ECHS1
1915	EEF1A1
1933	EEF1B2
1936	EEF1D
1937	EEF1G
1938	EEF2
1962	EHHADH
1964	EIF1AX
1965	EIF2S1
1967	EIF2B1
1968	EIF2S3
1973	EIF4A1
1974	EIF4A2
1975	EIF4B
1977	EIF4E
1978	EIF4EBP1
1981	EIF4G1
1983	EIF5
1984	EIF5A
1994	ELAVL1
2023	ENO1
2026	ENO2
2027	ENO3
2033	EP300
2052	EPHX1
2053	EPHX2
2058	EPRS
2101	ESRRA
2107	ETF1
2131	EXT1
2132	EXT2
2147	F2
2155	F7
2158	F9
2159	F10
2167	FABP4
2168	FABP1
2172	FABP6
2180	ACSL1
2181	ACSL3
2182	ACSL4
2184	FAH
2194	FASN
2197	FAU
2203	FBP1
2222	FDFT1
2224	FDPS
2235	FECH
2239	GPC4
2262	GPC5
2271	FH
2272	FHIT
2274	FHL2
2326	FMO1
2327	FMO2
2328	FMO3
2329	FMO4
2330	FMO5
2331	FMOD
2356	FPGS
2395	FXN
2475	MTOR
2488	FSHB
2495	FTH1
2530	FUT8
2531	KDSR
2538	G6PC
2539	G6PD
2542	SLC37A4
2548	GAA
2571	GAD1
2572	GAD2
2581	GALC
2582	GALE
2584	GALK1
2585	GALK2
2589	GALNT1
2590	GALNT2
2591	GALNT3
2592	GALT
2593	GAMT
2595	GANC
2597	GAPDH
2618	GART
2626	GATA4
2628	GATM
2629	GBA
2632	GBE1
2638	GC
2639	GCDH
2641	GCG
2642	GCGR
2645	GCK
2646	GCKR
2650	GCNT1
2671	GFER
2673	GFPT1
2677	GGCX
2678	GGT1
2683	B4GALT1
2686	GGT7
2687	GGT5
2695	GIP
2710	GK
2712	GK2
2717	GLA
2719	GPC3
2720	GLB1
2729	GCLC
2730	GCLM
2731	GLDC
2739	GLO1
2740	GLP1R
2744	GLS
2745	GLRX
2746	GLUD1
2747	GLUD2
2752	GLUL
2760	GM2A
2762	GMDS
2766	GMPR
2767	GNA11
2769	GNA15
2770	GNAI1
2771	GNAI2
2775	GNAO1
2776	GNAQ
2778	GNAS
2782	GNB1
2783	GNB2
2784	GNB3
2785	GNG3
2786	GNG4
2787	GNG5
2788	GNG7
2790	GNG10
2791	GNG11
2792	GNGT1
2793	GNGT2
2799	GNS
2805	GOT1
2806	GOT2
2817	GPC1
2819	GPD1
2820	GPD2
2821	GPI
2864	FFAR1
2875	GPT
2876	GPX1
2877	GPX2
2878	GPX3
2879	GPX4
2880	GPX5
2882	GPX7
2922	GRP
2923	PDIA3
2936	GSR
2937	GSS
2938	GSTA1
2939	GSTA2
2940	GSTA3
2941	GSTA4
2944	GSTM1
2946	GSTM2
2947	GSTM3
2948	GSTM4
2949	GSTM5
2950	GSTP1
2952	GSTT1
2953	GSTT2
2954	GSTZ1
2977	GUCY1A2
2982	GUCY1A3
2983	GUCY1B3
2984	GUCY2C
2986	GUCY2F
2987	GUK1
2990	GUSB
2992	GYG1
2997	GYS1
2998	GYS2
3000	GUCY2D
3028	HSD17B10
3029	HAGH
3030	HADHA
3032	HADHB
3033	HADH
3034	HAL
3036	HAS1
3037	HAS2
3038	HAS3
3052	HCCS
3067	HDC
3073	HEXA
3074	HEXB
3081	HGD
3091	HIF1A
3098	HK1
3099	HK2
3101	HK3
3145	HMBS
3155	HMGCL
3156	HMGCR
3157	HMGCS1
3158	HMGCS2
3161	HMMR
3162	HMOX1
3163	HMOX2
3176	HNMT
3184	HNRNPD
3242	HPD
3251	HPRT1
3283	HSD3B1
3284	HSD3B2
3290	HSD11B1
3292	HSD17B1
3293	HSD17B3
3295	HSD17B4
3304	HSPA1B
3312	HSPA8
3313	HSPA9
3315	HSPB1
3329	HSPD1
3339	HSPG2
3340	NDST1
3373	HYAL1
3417	IDH1
3418	IDH2
3419	IDH3A
3420	IDH3B
3421	IDH3G
3422	IDI1
3423	IDS
3425	IDUA
3612	IMPA1
3613	IMPA2
3614	IMPDH1
3615	IMPDH2
3620	IDO1
3623	INHA
3624	INHBA
3625	INHBB
3626	INHBC
3628	INPP1
3630	INS
3631	INPP4A
3632	INPP5A
3633	INPP5B
3636	INPPL1
3646	EIF3E
3670	ISL1
3703	STT3A
3704	ITPA
3705	ITPK1
3706	ITPKA
3707	ITPKB
3709	ITPR2
3710	ITPR3
3712	IVD
3745	KCNB1
3747	KCNC2
3767	KCNJ11
3790	KCNS3
3795	KHK
3801	KIFC3
3842	TNPO1
3906	LALBA
3921	RPSA
3930	LBR
3931	LCAT
3938	LCT
3939	LDHA
3945	LDHB
3948	LDHC
3949	LDLR
3952	LEP
3972	LHB
3990	LIPC
3991	LIPE
3992	FADS1
3998	LMAN1
4018	LPA
4023	LPL
4036	LRP2
4047	LSS
4048	LTA4H
4056	LTC4S
4060	LUM
4082	MARCKS
4116	MAGOH
4121	MAN1A1
4124	MAN2A1
4128	MAOA
4129	MAOB
4141	MARS
4143	MAT1A
4144	MAT2A
4166	CHST6
4190	MDH1
4191	MDH2
4199	ME1
4200	ME2
4245	MGAT1
4247	MGAT2
4248	MGAT3
4249	MGAT5
4257	MGST1
4258	MGST2
4259	MGST3
4282	MIF
4329	ALDH6A1
4337	MOCS1
4338	MOCS2
4351	MPI
4357	MPST
4507	MTAP
4522	MTHFD1
4524	MTHFR
4534	MTM1
4547	MTTP
4548	MTR
4580	MTX1
4583	MUC2
4585	MUC4
4586	MUC5AC
4588	MUC6
4589	MUC7
4594	MUT
4597	MVD
4598	MVK
4669	NAGLU
4686	NCBP1
4736	RPL10A
4758	NEU1
4759	NEU2
4800	NFYA
4801	NFYB
4830	NME1
4831	NME2
4832	NME3
4833	NME4
4837	NNMT
4842	NOS1
4843	NOS2
4846	NOS3
4848	CNOT2
4849	CNOT3
4850	CNOT4
4860	PNP
4862	NPAS2
4881	NPR1
4882	NPR2
4899	NRF1
4907	NT5E
4927	NUP88
4942	OAT
4946	OAZ1
4947	OAZ2
4952	OCRL
4953	ODC1
4958	OMD
4967	OGDH
4969	OGN
5007	OSBP
5009	OTC
5019	OXCT1
5033	P4HA1
5034	P4HB
5045	FURIN
5048	PAFAH1B1
5049	PAFAH1B2
5050	PAFAH1B3
5051	PAFAH2
5053	PAH
5073	PARN
5080	PAX6
5091	PC
5092	PCBD1
5095	PCCA
5096	PCCB
5105	PCK1
5106	PCK2
5122	PCSK1
5130	PCYT1A
5136	PDE1A
5137	PDE1C
5138	PDE2A
5139	PDE3A
5140	PDE3B
5141	PDE4A
5142	PDE4B
5143	PDE4C
5144	PDE4D
5145	PDE6A
5146	PDE6C
5147	PDE6D
5148	PDE6G
5149	PDE6H
5150	PDE7A
5151	PDE8A
5152	PDE9A
5153	PDE1B
5158	PDE6B
5160	PDHA1
5161	PDHA2
5162	PDHB
5163	PDK1
5164	PDK2
5165	PDK3
5166	PDK4
5167	ENPP1
5168	ENPP2
5169	ENPP3
5198	PFAS
5201	PFDN1
5202	PFDN2
5203	PFDN4
5204	PFDN5
5207	PFKFB1
5208	PFKFB2
5209	PFKFB3
5210	PFKFB4
5211	PFKL
5213	PFKM
5214	PFKP
5223	PGAM1
5224	PGAM2
5226	PGD
5230	PGK1
5232	PGK2
5236	PGM1
5238	PGM3
5243	ABCB1
5244	ABCB4
5255	PHKA1
5256	PHKA2
5257	PHKB
5260	PHKG1
5261	PHKG2
5264	PHYH
5277	PIGA
5279	PIGC
5281	PIGF
5283	PIGH
5286	PIK3C2A
5287	PIK3C2B
5288	PIK3C2G
5289	PIK3C3
5290	PIK3CA
5291	PIK3CB
5293	PIK3CD
5294	PIK3CG
5295	PIK3R1
5296	PIK3R2
5297	PI4KA
5298	PI4KB
5305	PIP4K2A
5313	PKLR
5319	PLA2G1B
5320	PLA2G2A
5321	PLA2G4A
5322	PLA2G5
5329	PLAUR
5330	PLCB2
5331	PLCB3
5332	PLCB4
5333	PLCD1
5335	PLCG1
5336	PLCG2
5337	PLD1
5338	PLD2
5346	PLIN1
5360	PLTP
5372	PMM1
5373	PMM2
5393	EXOSC9
5406	PNLIP
5407	PNLIPRP1
5408	PNLIPRP2
5409	PNMT
5422	POLA1
5424	POLD1
5425	POLD2
5426	POLE
5427	POLE2
5430	POLR2A
5431	POLR2B
5432	POLR2C
5433	POLR2D
5434	POLR2E
5435	POLR2F
5436	POLR2G
5437	POLR2H
5438	POLR2I
5439	POLR2J
5440	POLR2K
5441	POLR2L
5443	POMC
5465	PPARA
5468	PPARG
5469	MED1
5471	PPAT
5476	CTSA
5498	PPOX
5499	PPP1CA
5500	PPP1CB
5501	PPP1CC
5515	PPP2CA
5516	PPP2CB
5518	PPP2R1A
5519	PPP2R1B
5520	PPP2R2A
5528	PPP2R5D
5549	PRELP
5557	PRIM1
5558	PRIM2
5562	PRKAA1
5563	PRKAA2
5564	PRKAB1
5565	PRKAB2
5566	PRKACA
5567	PRKACB
5568	PRKACG
5573	PRKAR1A
5575	PRKAR1B
5576	PRKAR2A
5577	PRKAR2B
5578	PRKCA
5580	PRKCD
5587	PRKD1
5589	PRKCSH
5600	MAPK11
5624	PROC
5625	PRODH
5627	PROS1
5631	PRPS1
5634	PRPS2
5641	LGMN
5660	PSAP
5682	PSMA1
5683	PSMA2
5684	PSMA3
5685	PSMA4
5686	PSMA5
5687	PSMA6
5688	PSMA7
5689	PSMB1
5690	PSMB2
5691	PSMB3
5692	PSMB4
5693	PSMB5
5694	PSMB6
5695	PSMB7
5696	PSMB8
5698	PSMB9
5699	PSMB10
5700	PSMC1
5701	PSMC2
5702	PSMC3
5704	PSMC4
5705	PSMC5
5706	PSMC6
5707	PSMD1
5708	PSMD2
5709	PSMD3
5710	PSMD4
5711	PSMD5
5713	PSMD7
5714	PSMD8
5715	PSMD9
5716	PSMD10
5717	PSMD11
5718	PSMD12
5719	PSMD13
5720	PSME1
5721	PSME2
5723	PSPH
5728	PTEN
5730	PTGDS
5740	PTGIS
5742	PTGS1
5743	PTGS2
5831	PYCR1
5832	ALDH18A1
5833	PCYT2
5834	PYGB
5836	PYGL
5837	PYGM
5860	QDPR
5903	RANBP2
5906	RAP1A
5908	RAP1B
5948	RBP2
5959	RDH5
5973	RENBP
6095	RORA
6120	RPE
6121	RPE65
6122	RPL3
6123	RPL3L
6124	RPL4
6125	RPL5
6128	RPL6
6129	RPL7
6130	RPL7A
6132	RPL8
6133	RPL9
6134	RPL10
6135	RPL11
6136	RPL12
6137	RPL13
6138	RPL15
6139	RPL17
6141	RPL18
6142	RPL18A
6143	RPL19
6144	RPL21
6146	RPL22
6147	RPL23A
6152	RPL24
6154	RPL26
6155	RPL27
6156	RPL30
6157	RPL27A
6158	RPL28
6159	RPL29
6160	RPL31
6161	RPL32
6164	RPL34
6165	RPL35A
6167	RPL37
6168	RPL37A
6169	RPL38
6170	RPL39
6171	RPL41
6173	RPL36A
6175	RPLP0
6176	RPLP1
6181	RPLP2
6184	RPN1
6185	RPN2
6187	RPS2
6188	RPS3
6189	RPS3A
6191	RPS4X
6192	RPS4Y1
6193	RPS5
6194	RPS6
6201	RPS7
6202	RPS8
6203	RPS9
6204	RPS10
6205	RPS11
6206	RPS12
6207	RPS13
6208	RPS14
6209	RPS15
6210	RPS15A
6217	RPS16
6218	RPS17
6222	RPS18
6223	RPS19
6224	RPS20
6227	RPS21
6228	RPS23
6229	RPS24
6230	RPS25
6231	RPS26
6232	RPS27
6233	RPS27A
6234	RPS28
6235	RPS29
6240	RRM1
6241	RRM2
6256	RXRA
6296	ACSM3
6303	SAT1
6307	MSMO1
6309	SC5D
6342	SCP2
6382	SDC1
6383	SDC2
6385	SDC4
6389	SDHA
6390	SDHB
6391	SDHC
6392	SDHD
6396	SEC13
6448	SGSH
6468	FBXW4
6470	SHMT1
6472	SHMT2
6476	SI
6480	ST6GAL1
6482	ST3GAL1
6483	ST3GAL2
6487	ST3GAL3
6513	SLC2A1
6514	SLC2A2
6515	SLC2A3
6517	SLC2A4
6518	SLC2A5
6523	SLC5A1
6528	SLC5A5
6535	SLC6A8
6548	SLC9A1
6554	SLC10A1
6555	SLC10A2
6566	SLC16A1
6573	SLC19A1
6576	SLC25A1
6579	SLCO1A2
6580	SLC22A1
6581	SLC22A3
6582	SLC22A2
6604	SMARCD3
6606	SMN1
6607	SMN2
6609	SMPD1
6610	SMPD2
6611	SMS
6616	SNAP25
6628	SNRPB
6632	SNRPD1
6633	SNRPD2
6634	SNRPD3
6635	SNRPE
6636	SNRPF
6637	SNRPG
6652	SORD
6675	UAP1
6713	SQLE
6715	SRD5A1
6716	SRD5A2
6718	AKR1D1
6720	SREBF1
6721	SREBF2
6723	SRM
6726	SRP9
6727	SRP14
6728	SRP19
6729	SRP54
6730	SRP68
6731	SRP72
6734	SRPR
6745	SSR1
6746	SSR2
6747	SSR3
6748	SSR4
6770	STAR
6783	SULT1E1
6785	ELOVL4
6794	STK11
6799	SULT1A2
6804	STX1A
6812	STXBP1
6817	SULT1A1
6818	SULT1A3
6820	SULT2B1
6821	SUOX
6822	SULT2A1
6833	ABCC8
6837	MED22
6844	VAMP2
6861	SYT5
6888	TALDO1
6898	TAT
6901	TAZ
6902	TBCA
6903	TBCC
6904	TBCD
6905	TBCE
6907	TBL1X
6916	TBXAS1
6945	MLX
6950	TCP1
6999	TDO2
7003	TEAD1
7004	TEAD4
7005	TEAD3
7054	TH
7083	TK1
7084	TK2
7086	TKT
7108	TM7SF2
7157	TP53
7166	TPH1
7167	TPI1
7172	TPMT
7173	TPO
7175	TPR
7203	CCT3
7252	TSHB
7263	TST
7264	TSTA3
7277	TUBA4A
7278	TUBA3C
7280	TUBB2A
7295	TXN
7296	TXNRD1
7298	TYMS
7299	TYR
7306	TYRP1
7311	UBA52
7357	UGCG
7358	UGDH
7360	UGP2
7363	UGT2B4
7364	UGT2B7
7365	UGT2B10
7366	UGT2B15
7367	UGT2B17
7368	UGT8
7371	UCK2
7372	UMPS
7378	UPP1
7389	UROD
7390	UROS
7411	VBP1
7416	VDAC1
7453	WARS
7458	EIF4H
7498	XDH
7514	XPO1
7529	YWHAB
7534	YWHAZ
7538	ZFP36
7841	MOGS
7846	TUBA1A
7915	ALDH5A1
7941	PLA2G7
7991	TUSC3
8021	NUP214
8029	CUBN
8034	SLC25A16
8050	PDHX
8086	AAAS
8125	ANP32A
8128	ST8SIA2
8202	NCOA3
8228	PNPLA4
8237	USP11
8277	TKTL1
8309	ACOX2
8310	ACOX3
8382	NME5
8394	PIP5K1A
8395	PIP5K1B
8396	PIP4K2B
8398	PLA2G6
8399	PLA2G10
8402	SLC25A11
8424	BBOX1
8443	GNPAT
8463	TEAD2
8480	RAE1
8487	GEMIN2
8503	PIK3R3
8509	NDST2
8513	LIPF
8525	DGKZ
8526	DGKE
8527	DGKD
8528	DDO
8534	CHST1
8540	AGPS
8560	DEGS1
8564	KMO
8566	PDXK
8570	KHSRP
8604	SLC25A12
8605	PLA2G4C
8608	RDH16
8611	PPAP2A
8612	PPAP2C
8613	PPAP2B
8622	PDE8B
8639	AOC3
8644	AKR1C3
8647	ABCB11
8648	NCOA1
8654	PDE5A
8659	ALDH4A1
8661	EIF3A
8662	EIF3B
8663	EIF3C
8664	EIF3D
8665	EIF3F
8666	EIF3G
8667	EIF3H
8668	EIF3I
8669	EIF3J
8681	JMJD7-PLA2G4B
8692	HYAL2
8694	DGAT1
8702	B4GALT4
8703	B4GALT3
8704	B4GALT2
8714	ABCC3
8733	GPAA1
8741	TNFSF13
8760	CDS2
8776	MTMR1
8789	FBP2
8790	FPGT
8800	PEX11A
8801	SUCLG2
8802	SUCLG1
8803	SUCLA2
8813	DPM1
8818	DPM2
8821	INPP4B
8824	CES2
8826	IQGAP1
8833	GMPS
8841	HDAC3
8854	ALDH1A2
8858	PROZ
8867	SYNJ1
8871	SYNJ2
8877	SPHK1
8879	SGPL1
8884	SLC5A6
8890	EIF2B4
8891	EIF2B3
8892	EIF2B2
8893	EIF2B5
8894	EIF2S2
8897	MTMR3
8898	MTMR2
8908	GYG2
8942	KYNU
8972	MGAM
8974	P4HA2
9023	CH25H
9045	RPL14
9054	NFS1
9060	PAPSS2
9061	PAPSS1
9091	PIGQ
9107	MTMR6
9108	MTMR7
9110	MTMR4
9122	SLC16A4
9123	SLC16A3
9125	RQCD1
9162	DGKI
9217	VAPB
9218	VAPA
9227	LRAT
9245	GCNT3
9249	DHRS3
9261	MAPKAPK2
9282	MED14
9331	B4GALT6
9334	B4GALT5
9337	CNOT8
9348	NDST3
9349	RPL23
9380	GRHPR
9388	LIPG
9394	HS6ST1
9412	MED21
9415	FADS2
9429	ABCG2
9435	CHST2
9439	MED23
9440	MED17
9441	MED26
9442	MED27
9443	MED7
9446	GSTO1
9453	GGPS1
9468	PCYT1B
9469	CHST3
9477	MED20
9487	PIGL
9488	PIGB
9489	PGS1
9491	PSMF1
9495	AKAP5
9512	PMPCB
9514	GAL3ST1
9517	SPTLC2
9524	TECR
9533	POLR1C
9536	PTGES
9562	MINPP1
9572	NR1D1
9575	CLOCK
9583	ENTPD4
9588	PRDX6
9611	NCOR1
9612	NCOR2
9615	GDA
9619	ABCG1
9630	GNA14
9631	NUP155
9632	SEC24C
9653	HS2ST1
9663	LPIN2
9669	EIF5B
9672	SDC3
9688	NUP93
9695	EDEM1
9761	MLEC
9775	EIF4A3
9789	SPCS2
9791	PTDSS1
9804	TOMM20
9818	NUPL1
9836	LCMT2
9861	PSMD6
9862	MED24
9868	TOMM70A
9871	SEC24D
9883	POM121
9887	SMG7
9896	FIG4
9926	LPGAT1
9939	RBM8A
9945	GFPT2
9951	HS3ST4
9953	HS3ST3B1
9955	HS3ST3A1
9956	HS3ST2
9957	HS3ST1
9962	SLC23A2
9963	SLC23A1
9968	MED12
9972	NUP153
9997	SCO2
10001	MED6
10002	NR2E3
10005	ACOT8
10007	GNPDA1
10020	GNE
10025	MED16
10026	PIGK
10057	ABCC5
10063	COX17
10071	MUC12
10073	SNUPN
10082	GPC6
10087	COL4A3BP
10090	UST
10113	PREB
10135	NAMPT
10157	AASS
10162	LPCAT3
10165	SLC25A13
10166	SLC25A15
10170	DHRS9
10195	ALG3
10201	NME6
10213	PSMD14
10243	GPHN
10245	TIMM17B
10327	AKR1A1
10331	B3GNT3
10352	WARS2
10376	TUBA1B
10380	BPNT1
10381	TUBB3
10382	TUBB4A
10383	TUBB4B
10390	CEPT1
10400	PEMT
10402	ST3GAL6
10411	RAPGEF3
10413	YAP1
10419	PRMT5
10423	CDIPT
10427	SEC24B
10434	LYPLA1
10440	TIMM17A
10449	ACAA2
10452	TOMM40
10455	ECI2
10469	TIMM44
10471	PFDN6
10478	SLC25A17
10484	SEC23A
10499	NCOA2
10528	NOP56
10554	AGPAT1
10555	AGPAT2
10558	SPTLC1
10560	SLC19A2
10564	ARFGEF2
10574	CCT7
10575	CCT4
10576	CCT2
10587	TXNRD2
10599	SLCO1B1
10605	PAIP1
10606	PAICS
10610	ST6GALNAC2
10621	POLR3F
10622	POLR3G
10623	POLR3C
10651	MTX2
10654	PMVK
10678	B3GNT2
10681	GNB5
10682	EBP
10694	CCT8
10714	POLD3
10720	UGT2B11
10762	NUP50
10768	AHCYL1
10797	MTHFD2
10825	NEU3
10841	FTCD
10846	PDE10A
10855	HPSE
10873	ME3
10891	PPARGC1A
10894	LYVE1
10901	DHRS4
10905	MAN1A2
10921	RNPS1
10941	UGT2A1
10952	SEC61B
10993	SDS
10998	SLC27A5
11001	SLC27A2
11010	GLIPR1
11069	RAPGEF4
11081	KERA
11097	NUPL2
11112	HIBADH
11128	POLR3A
11145	PLA2G16
11157	LSM6
11164	NUDT5
11181	TREH
11185	INMT
11218	DDX20
11224	RPL35
11226	GALNT6
11227	GALNT5
11238	CA5B
11253	MAN1B1
11282	MGAT4B
11285	B4GALT7
11313	LYPLA2
11320	MGAT4A
11328	FKBP9
11340	EXOSC8
11343	MGLL
22794	CASC3
22803	XRN2
22845	DOLK
22856	CHSY1
22872	SEC31A
22894	DIS3
22901	ARSG
22908	SACM1L
22916	NCBP2
22928	SEPHS2
22929	SEPHS1
22934	RPIA
22948	CCT5
22978	NT5C2
23016	EXOSC7
23049	SMG1
23054	NCOA6
23057	NMNAT2
23097	CDK19
23165	NUP205
23171	GPD1L
23175	LPIN1
23193	GANAB
23198	PSME4
23203	PMPCA
23225	NUP210
23236	PLCB1
23293	SMG6
23305	ACSL6
23309	SIN3B
23381	SMG5
23382	AHCYL2
23389	MED13L
23396	PIP5K1C
23404	EXOSC2
23417	MLYCD
23446	SLC44A1
23464	GCAT
23471	TRAM1
23474	ETHE1
23475	QPRT
23478	SEC11A
23480	SEC61G
23498	HAAO
23511	NUP188
23521	RPL13A
23530	NNT
23533	PIK3R5
23539	SLC16A8
23556	PIGN
23563	CHST5
23600	AMACR
23632	CA14
23636	NUP62
23644	EDC4
23646	PLD3
23649	POLA2
23658	LSM5
23659	PLA2G15
23708	GSPT2
23760	PITPNB
23761	PISD
24142	NAT6
25796	PGLS
25804	LSM4
25813	SAMM50
25834	MGAT4C
25870	SUMF2
25873	RPL36
25885	POLR1A
25902	MTHFD1L
25904	CNOT10
25929	GEMIN5
25937	WWTR1
25942	SIN3A
26007	DAK
26019	UPF2
26035	GLCE
26061	HACL1
26119	LDLRAP1
26190	FBXW2
26224	FBXL3
26227	PHGDH
26229	B3GAT3
26230	TIAM2
26234	FBXL5
26251	KCNG2
26270	FBXO6
26272	FBXO4
26275	HIBCH
26279	PLA2G2D
26289	AK5
26290	GALNT8
26330	GAPDHS
26515	TIMM10B
26517	TIMM13
26519	TIMM10
26520	TIMM9
26521	TIMM8B
26873	OPLAH
26985	AP3M1
26986	PABPC1
27010	TPK1
27034	ACAD8
27063	ANKRD1
27087	B3GAT1
27090	ST6GALNAC4
27115	PDE7B
27124	INPP5J
27159	CHIA
27165	GLS2
27232	GNMT
27235	COQ2
27242	TNFRSF21
27257	LSM1
27258	LSM3
27294	DHDH
27304	MOCS3
27306	HPGDS
27335	EIF3K
27430	MAT2B
28234	SLCO1B3
28960	DCPS
28972	SPCS1
28985	MCTS1
29071	C1GALT1C1
29079	MED4
29085	PHPT1
29841	GRHL1
29880	ALG5
29883	CNOT7
29920	PYCR2
29922	NME7
29925	GMPPB
29926	GMPPA
29927	SEC61A1
29928	TIMM22
29929	ALG6
29940	DSE
29947	DNMT3L
29956	CERS2
29958	DMGDH
29968	PSAT1
30814	PLA2G2E
30833	NT5C
30834	ZNRD1
30849	PIK3R4
50484	RRM2B
50486	G0S2
50487	PLA2G3
50515	CHST11
50614	GALNT9
50628	GEMIN4
50640	PNPLA8
50700	RDH8
50808	AK3
50814	NSDHL
50940	PDE11A
51003	MED31
51005	AMDHD2
51010	EXOSC3
51013	EXOSC1
51025	PAM16
51046	ST8SIA3
51056	LAP3
51060	TXNDC12
51074	APIP
51082	POLR1D
51085	MLXIPL
51099	ABHD5
51109	RDH11
51121	RPL26L1
51128	SAR1B
51129	ANGPTL4
51144	HSD17B12
51166	AADAT
51179	HAO2
51196	PLCE1
51205	ACP6
51227	PIGP
51251	NT5C3A
51268	PIPOX
51292	GMPR2
51301	GCNT4
51363	CHST15
51380	CSAD
51409	HEMK1
51422	PRKAG2
51451	LCMT1
51477	ISYNA1
51478	HSD17B7
51540	SCLY
51582	AZIN1
51586	MED15
51604	PIGT
51686	OAZ3
51703	ACSL5
51727	CMPK1
51728	POLR3K
51733	UPB1
51763	INPP5K
51764	GNG13
51808	PHAX
51809	GALNT7
53343	NUDT9
53354	PANK1
53371	NUP54
54107	POLE3
54187	NANS
54331	GNG2
54344	DPM3
54363	HAO1
54461	FBXW5
54464	XRN1
54480	CHPF2
54490	UGT2B28
54498	SMOX
54512	EXOSC4
54543	TOMM7
54575	UGT1A10
54576	UGT1A8
54577	UGT1A7
54578	UGT1A6
54579	UGT1A5
54600	UGT1A9
54657	UGT1A4
54658	UGT1A1
54659	UGT1A3
54675	CRLS1
54677	CROT
54704	PDP1
54797	MED18
54872	PIGG
54884	RETSAT
54898	ELOVL2
54947	LPCAT2
54963	UCKL1
54965	PIGX
54988	ACSM5
55034	MOCOS
55066	PDPR
55090	MED9
55163	PNPO
55176	SEC61A2
55181	SMG8
55191	NADSYN1
55217	TMLHE
55224	ETNK2
55229	PANK4
55256	ADI1
55276	PGM2
55294	FBXW7
55300	PI4K2B
55312	RFK
55326	AGPAT5
55331	ACER3
55349	CHDH
55361	PI4K2A
55454	CSGALNACT2
55500	ETNK1
55501	CHST12
55512	SMPD3
55568	GALNT10
55576	STAB2
55577	NAGK
55586	MIOX
55588	MED29
55627	SMPD4
55650	PIGV
55697	VAC14
55703	POLR3B
55711	FAR2
55741	EDEM2
55746	NUP133
55748	CNDP2
55750	AGK
55753	OGDHL
55757	UGGT2
55790	CSGALNACT1
55798	METTL2B
55802	DCP1A
55811	ADCY10
55821	ALLC
55902	ACSS2
55907	CMAS
55970	GNG12
56006	SMG9
56052	ALG1
56261	GPCPD1
56267	CCBL2
56474	CTPS2
56548	CHST7
56623	INPP5E
56624	ASAH2
56648	EIF5A2
56655	POLE4
56667	MUC13
56848	SPHK2
56886	UGGT1
56894	AGPAT3
56895	AGPAT4
56898	BDH2
56913	C1GALT1
56915	EXOSC5
56922	MCCC1
56953	NT5M
56954	NIT2
56993	TOMM22
56994	CHPT1
57016	AKR1B10
57104	PNPLA2
57122	NUP107
57134	MAN1C1
57153	SLC44A2
57171	DOLPP1
57452	GALNT16
57472	CNOT6
57546	PDP2
57678	GPAM
57704	GBA2
57733	GBA3
57761	TRIB3
57804	POLD4
57818	G6PC2
57819	LSM2
57876	MUC3B
58472	SQRDL
58477	SRPRB
58478	ENOPH1
58497	PRUNE
58510	PRODH2
59345	GNB4
60481	ELOVL5
60487	TRMT11
60490	PPCDC
60495	HPSE2
60496	AASDHPPT
60559	SPCS3
63826	SRR
63827	BCAN
63917	GALNT11
63971	KIF13A
64064	OXCT2
64087	MCCC2
64240	ABCG5
64241	ABCG8
64409	WBSCR17
64419	MTMR14
64425	POLR1E
64579	NDST4
64600	PLA2G2F
64711	HS3ST6
64768	IPPK
64781	CERK
64802	NMNAT1
64834	ELOVL1
64841	GNPNAT1
64900	LPIN3
64902	AGXT2
65109	UPF3B
65110	UPF3A
65220	NADK
65263	PYCRL
65985	AACS
79001	VKORC1
79017	GGCT
79023	NUP37
79053	ALG8
79071	ELOVL6
79084	WDR77
79087	ALG12
79143	MBOAT7
79178	THTPA
79369	B3GNT4
79586	CHPF
79603	CERS4
79611	ACSS3
79623	GALNT14
79642	ARSJ
79644	SRD5A3
79646	PANK3
79694	MANEA
79695	GALNT12
79717	PPCS
79718	TBL1XR1
79760	GEMIN7
79796	ALG9
79799	UGT2A3
79814	AGMAT
79833	GEMIN6
79837	PIP4K2C
79868	ALG13
79887	PLBD1
79888	LPCAT1
79902	NUP85
79944	L2HGDH
79993	ELOVL7
80025	PANK2
80031	SEMA6D
80055	PGAP1
80142	PTGES2
80146	UXS1
80153	EDC3
80267	EDEM3
80270	HSD3B7
80273	GRPEL1
80308	FLAD1
80339	PNPLA3
80347	COASY
80704	SLC19A3
80736	SLC44A4
80765	STARD5
80896	NPL
81027	TUBB1
81034	SLC25A32
81490	PTDSS2
81537	SGPP1
81579	PLA2G12A
81693	AMN
81857	MED25
81888	HYI
81929	SEH1L
83401	ELOVL3
83475	DOHH
83539	CHST9
83549	UCK1
83594	NUDT12
83729	INHBE
83752	LONP2
83884	SLC25A2
84002	B3GNT5
84172	POLR1B
84188	FAR1
84245	MRI1
84246	MED10
84264	HAGHL
84265	POLR3GL
84532	ACSS1
84617	TUBB6
84618	NT5C1A
84647	PLA2G12B
84649	DGAT2
84693	MCEE
84706	GPT2
84720	PIGO
84735	CNDP1
84752	B3GNT9
84790	TUBA1C
84803	AGPAT9
84812	PLCD4
84890	ADO
84920	ALG10
85365	ALG2
85456	TNKS1BP1
85465	EPT1
87178	PNPT1
89869	PLCZ1
89874	SLC25A21
90161	HS6ST2
90390	MED30
90411	MCFD2
90701	SEC11C
91012	CERS5
91703	ACY3
91734	IDI2
91869	RFT1
92483	LDHAL6B
92579	G6PC3
92609	TIMM50
92935	MARS2
93010	B3GNT7
93034	NT5C1B
93183	PIGM
93492	TPTE2
93650	ACPT
93659	CGB5
94005	PIGS
94025	MUC16
94033	FTMT
94115	CGB8
94235	GNG8
96764	TGS1
112483	SAT2
112950	MED8
113026	PLCD3
113189	CHST14
113235	SLC46A1
113457	TUBA3D
114049	WBSCR22
114805	GALNT13
116285	ACSM1
116519	APOA5
117248	GALNT15
118430	MUCL1
118460	EXOSC6
119391	GSTO2
121278	TPH2
122481	AK7
122618	PLD4
122622	ADSSL1
123099	DEGS2
123745	PLA2G4E
123876	ACSM2A
124454	EARS2
124583	CANT1
124975	GGT6
125061	AFMID
125981	ACER1
126129	CPT1C
126792	B3GALT6
126969	SLC44A3
128869	PIGU
129401	NUP35
129607	CMPK2
129642	MBOAT2
129807	NEU4
130013	ACMSD
130367	SGPP2
130589	GALM
131118	DNAJC19
131474	CHCHD4
131669	UROC1
131965	METTL6
132158	GLYCTK
132789	GNPDA2
133121	ENPP6
133522	PPARGC1B
134266	GRPEL2
134429	STARD4
134526	ACOT12
135152	B3GAT2
137872	ADHFE1
137964	AGPAT6
139596	UPRT
139760	GPR119
140453	MUC17
140838	NANP
143471	PSMA8
143662	MUC15
144193	AMDHD1
144245	ALG10B
145226	RDH12
146712	B3GNTL1
146850	PIK3R6
147323	STARD6
150274	HSCB
150763	GPAT2
151531	UPP2
151742	PPM1L
153642	ARSK
154141	MBOAT1
157506	RDH10
158835	AWAT2
160287	LDHAL6A
160851	DGKH
161823	ADAL
162417	NAGS
162466	PHOSPHO1
166012	CHST13
166929	SGMS2
167227	DCP2
168391	GALNTL5
169355	IDO2
171568	POLR3H
192134	B3GNT6
196513	DCP1B
196743	PAOX
196883	ADCY4
197257	LDHD
197258	FUK
199857	ALG14
200576	PIKFYVE
201164	PLD6
204219	CERS3
[truncated: 73 more rows]

## Sheet: Table 3-2
Table 3-2 The fold change of metabolic genes
GENE ID		TCGA_BRCA_98_1058-t.csv	TCGA_COADREAD_51_352-t.csv	TCGA_COAD_41_271-t.csv	TCGA_HNSC_44_444-t.csv	TCGA_KIRC_72_527-t.csv	TCGA_KIRP_32_259-t.csv	TCGA_LIHC_50_345-t.csv	TCGA_LUAD_58_505-t.csv	TCGA_LUSC_51_492-t.csv	TCGA_STAD_35_390-t.csv	TCGA_THCA_57_494-t.csv	count
ACACB	32	-13.1473	-3.34302	-3.33315	-4.05897	-2.06013	-2.56659	-1.53089	-2.56523	-4.12457	-2.56693	-2.87971	11
ADH1B	125	-34.4866	-17.9081	-15.615	-33.1846	-7.22488	-14.097	-2.34783	-8.76393	-30.532	-3.35473	-11.0112	11
EIF4EBP1	1978	2.38842	2.5313	2.64198	2.32553	3.77948	2.11225	1.80169	3.29922	7.84087	2.08271	1.68016	11
GNG7	2788	-2.58139	-5.52712	-5.25589	-4.06751	-2.87157	-2.5516	1.59459	-1.97966	-3.85604	-3.45759	-1.6424	11
HAGHL	84264	14.4615	11.9283	12.3044	3.77672	2.77911	4.7957	17.4209	2.67446	1.90582	5.81463	3.29402	11
POLE2	5427	3.63856	2.35157	2.47224	2.95421	2.4616	3.88591	7.27267	9.76246	9.59926	4.4536	1.8818	11
SPHK1	8877	1.62065	3.7109	3.8086	2.91213	3.16191	7.38749	7.76558	1.53252	2.96157	2.58481	2.26922	11
TK1	7083	7.82995	1.82152	1.92592	4.7656	1.77642	2.33386	8.62089	7.19608	12.4162	2.84898	2.08918	11
TUBB3	10381	8.77565	2.96763	2.94331	4.55541	2.01702	11.2146	4.74261	22.3309	9.04691	3.15342	5.37996	11
VCAN	1462	2.81937	3.26229	3.41318	4.27853	3.32445	7.8444	7.21025	3.36531	2.07449	4.67941	3.40897	11
ACSL4	2182	-2.40191	2.07282	2.20193	1.54536	-3.10364	-2.12358	6.117	-1.89083	-2.69028	2.03251		10
AKR1C1	1645	-11.7384	-2.13077	-2.0353	5.52346	-2.31653	4.60314	2.30166	10.2602	25.2415	-3.19579		10
AKR1C2	1646	-10.3412	-2.46009	-2.46019	4.19291	-2.27298	8.85892	2.85584	23.5961	46.6231	-3.24869		10
AOX1	316	-5.22271	-3.1639	-3.36124	-4.21837	-2.86474	-3.20538	-1.80674	-2.09778	-8.31676		-7.85151	10
ASNS	440	1.95388	2.8967	2.92409	2.94242	1.57144	2.63681	5.75846	3.44511	5.32505	2.07838		10
CA12	771	3.23727	-4.32582	-4.24482	1.61468	-1.5669	-3.78505	12.9436	3.31302	8.49739		5.67181	10
CA2	760		-30.2255	-29.621	3.06858	-2.70545	-2.66992	-1.53548	-2.43569	-2.0188	-2.00012	2.59405	10
CAV1	857	-10.3504	-3.96861	-3.30494	4.40837	4.28529		2.12165	-10.3313	-8.95817	-2.1507	-1.50724	10
CD36	948	-18.057	-4.35665	-4.04824	-1.90155	4.35365	-2.48343	2.49168	-7.12127	-7.40523	-3.00109		10
CSPG4	1464	-1.75894	-2.1519	-1.9945	4.96498	6.39115	-2.37818	7.91926	-1.55926		-2.36333	2.77741	10
DCN	1634	-3.91437	-3.03426	-2.74699		-6.50431	-7.73202	-3.05368	-2.56547	-2.52148	-2.00128	-4.23266	10
EXOSC5	56915	1.61731	2.59806	2.53829	1.61986	2.18903	1.65359	2.45651	2.46626	3.44473	2.36366		10
GPD1L	23171	-1.62386	-2.46536	-2.55304	-4.86787	-3.18508	-1.50929	2.99008	-1.65755	-3.96162		-1.55734	10
GPT	2875	-2.1318	-9.76457	-10.1502	-8.45477	-1.63757	-3.59493		5.23136	3.10013	-3.13112	3.69821	10
GPX3	2878	-13.0955	-4.49021	-4.56624	-3.96131	-3.22438	-11.2078		-4.44206	-10.6083	-3.99509	-1.77914	10
HMMR	3161	8.65578	2.68441	2.77922	3.62291	2.4727	4.33688	20.7527	11.219	10.3806	6.33408		10
IL4I1	259307	5.239	1.84917	1.81076	3.81979	4.09845	2.92897	4.54583	4.46387	2.97566	3.76556		10
IMPDH1	3614	1.64753	3.13271	3.12793	2.99157	1.68559	1.5618	3.24666		1.52125	1.79884	1.50179	10
ITPKA	3706	12.4922	-3.02892	-3.05957	3.61993	15.7617	6.90961	10.8306	52.702	16.1938		4.29869	10
LDHD	197257	-3.32282	-8.23866	-8.39865	-3.94867	-5.13133	-1.55406	-1.73477		-1.56827	-2.19461	-1.81939	10
LPGAT1	9926		1.74495	1.75167	1.81285	1.56217	1.85298	2.69992	2.16633	1.54935	1.92558	-1.67184	10
LYVE1	10894	-31.5148	-14.533	-14.0079	-3.74643		-4.89291	-4.36743	-8.9936	-14.6148	-6.08287	-9.5681	10
MTHFD1L	25902	1.56041	5.59522	5.80423	3.12073		1.93973	5.42979	1.91379	1.99586	5.79304	2.33891	10
NME1-NME2	654364	2.49099	3.06318	3.29864	1.92935	2.08584	3.6714	2.21005	2.13029	3.09879	2.30407		10
NR1D1	9572	-1.63387	1.92168	1.83062	1.50561	1.59069	2.03313		1.66598	1.97734	1.81182	3.5891	10
OGN	4969	-5.07269	-12.4603	-10.5063	-4.04317	-2.51306	-6.2052		-4.00626	-16.8233	-1.93648	-5.41193	10
PAFAH1B3	5050	5.0291	2.73731	2.74791	2.13072		1.56079	6.4014	5.12825	5.29094	3.05165	1.90969	10
PRELP	5549	-4.29739	-3.7402	-3.61586	-1.90365	-2.22544	-3.05842		-2.69378	-5.10043	-2.02576	-2.0059	10
PYCR1	5831	4.5243	3.45208	3.47959	2.35212	2.94119	6.42406	10.1934	14.7918	7.84913	2.68567		10
RRM2	6241	9.65289	2.74803	2.98661	2.8271	4.00575	7.08607	14.2852	10.8163	15.5184	4.17818		10
TRIB3	57761	2.97787	13.8364	14.1189	3.10733	7.71142	3.90157	1.86447	2.61558	3.48896	6.51371		10
TYMS	7298	4.35679		1.62866	3.24389	4.25287	3.69096	6.05953	5.16188	6.82755	4.36994	2.5959	10
ABCC3	8714		-1.70643	-1.77151	1.94547	4.55255	4.67722	1.55213	6.15543		2.14246	5.67174	9
ABCG2	9429	-3.05848	-29.8379	-33.8224		1.85948	-3.18001		-4.22352	-3.453	-4.49866	1.68977	9
ACAA2	10449	-2.38524	-3.06926	-3.26079	-1.9108		-1.60158	-1.96781	-1.51512	-2.37837	1.53952		9
ADA	100		2.04028	2.07756	4.02914	4.45509	2.46264	2.92263	2.15168	4.03022	-2.08298		9
AHCY	191	1.59076	2.89522	2.85603		-1.5268	-1.64189	1.59949	2.06543	3.30882	2.35128		9
AKR1C3	8644	-5.48928	-1.84113	-2.09139	5.53464		1.97821	4.66116	3.90214	10.3226	-1.71677		9
ALDH1B1	219	1.54617	1.6176	1.56984		-2.50583	-2.09634	-1.64571	2.28912	1.79679		-1.97184	9
ALDH6A1	4329	-2.01586	-1.83691	-1.78939	-2.08058	-9.56909	-7.99091	-2.48541		-1.70098		-1.8366	9
ALG3	10195	2.0501	1.91421	1.87231	2.93146		1.6891	2.36348	2.34506	4.67059	2.81692		9
ATIC	471	1.702	2.23794	2.21794	2.0379			2.39103	2.54542	2.06593	2.60113	1.84737	9
CA4	762	-43.2448	-38.5958	-52.7548		-2.98579	-23.1509	21.5181	-20.0217	-45.0145		-2.33925	9
CHPF	79586	2.48412	3.36199	3.39754	2.82398	1.54225	1.86699		2.56738	2.43045	2.21876		9
DNMT3B	1789	2.82901	4.28477	3.98148	6.96703		2.79271	7.10531	5.25836	8.17068	9.8985		9
DTYMK	1841	2.02174	2.09837	2.15368	2.55002		1.67129	4.00012	2.67651	3.20809	2.56978		9
EHHADH	1962	-2.19595	-1.96518	-2.07194	1.78953	-1.66506	-2.4262	-1.6098		2.23417		-1.57305	9
EPHX2	2053	-1.51267	-2.71675	-2.67352	-2.48721	-2.82398	-3.4091	-1.93487	-1.5639		-1.79042		9
FUT8	2530	1.91597	1.96756	2.07653	1.79111		2.36541	1.79626	2.85039	1.80916	1.72173		9
GGCT	79017	2.34915	2.62485	2.59683	1.69066			2.27039	3.44078	4.08759	2.77844	4.18829	9
GNPNAT1	64841	1.71082	1.76674	1.87269	2.06055	-1.69995	-1.79154		2.89721	2.17349	2.60367		9
GPD1	2819	-38.0125			-29.2657	-3.34115	-2.87032	-2.0878	-14.7976	-36.5711	-2.05912	2.35445	9
HK2	3099		-2.02532	-2.07702	1.65028	10.0862	10.7851	5.30653		2.3933	3.07549	1.71929	9
HPRT1	3251	2.09601	1.97957	1.95194	2.63724	-1.79029	-1.54302		2.23896	3.38514	2.55623		9
ITPA	3704	1.6478	1.74355	1.71965	1.66168		1.72292	2.41486	1.65954	1.71001	2.15051		9
LPCAT1	79888	2.23089	2.25133	2.33079	4.13429	5.23959	1.91826	4.38002		-4.11785	3.21159		9
MAN1C1	57134		-1.88943	-1.84335	-1.96397	-5.16616	-6.8271	-1.94496	-1.52083	-2.31826		-1.74853	9
MGAT4A	11320	1.71521	-2.0824	-2.20495	-1.64101	-1.73096	-1.95355	1.90908		-2.47958	1.58334		9
MIF	4282	3.42655	2.52608	2.58254	2.42923	2.46786		2.62756	3.14208	5.09677	1.913		9
MTHFD2	10797	2.68388	2.92252	3.11693	2.33452	1.8059		1.95994	3.09386	4.19965	3.77847		9
NME1	4830	3.44996	3.19622	3.30553	2.08304		2.97407	3.4389	4.97322	4.83286	3.1901		9
NUP210	23225	3.50419	2.77544	2.86828	2.74921			3.18656	2.39616	2.29992	2.70541	-1.62723	9
PC	5091	-3.0469	-2.05433	-2.07312	1.97848	-2.8483	-3.32712		3.66869	4.15216		2.7807	9
PDE2A	5138	-8.97271	-6.03409	-5.42725	-1.5296		-10.9753	-1.94771	-3.38571	-7.01498	-2.68028		9
PDE7A	5150		2.04274	2.08256	2.68486	2.09902	1.5546	2.78058		1.75384	2.88927	-1.57994	9
PFDN6	10471	2.0857	1.81752	1.77541	1.71167		1.62519	3.00473	2.22147	1.95239	2.08721		9
PFKFB4	5210	2.33936	1.59871	1.57236	2.37258	4.96709	2.18668	5.33697	1.88992	2.54549			9
PGK1	5230	1.71843	1.71811	1.74435	1.931	1.72464		2.06711	1.85028	2.54167	1.77931		9
PGM2L1	283209	1.60389	1.60365	1.63219	1.64719	1.72615	1.71312		3.86049	2.79843	4.79263		9
PIGW	284098	1.52748	1.73416	1.78995	1.59319	-1.57309		1.68894	1.68408	1.92664	3.55347		9
PLA2G16	11145	-2.61159	2.39871	2.27669	-2.16413	1.96131	2.72474			-2.48969	2.36935	1.65313	9
POLD1	5424	1.86682	1.85978	1.8675	2.66287		1.72724	4.26388	1.64002	2.28034	3.3438		9
POLD2	5425	1.53846	2.44124	2.48798	1.7131		1.64699	1.51842	1.8796	2.55864	1.81689		9
POLE	5426	1.50215	1.51369	1.55364	2.20294		1.58294	1.75009	2.18514	2.80849	2.73063		9
PPAP2C	8612	1.6962	1.85756	1.78222			4.78624	7.491	5.534	4.88233	2.40187	3.31488	9
PPM1L	151742	-2.20062	-1.80707	-1.6057	-2.17493	-1.64073	-3.20914			2.07201	-1.51869	-2.42096	9
PRIM2	5558	1.76466	1.86101	1.88359	3.16334		1.53291	4.52439	2.30956	2.97152	3.17484		9
PRKAR2B	5577	-5.65442	-3.63873	-3.29928	-1.91454	-5.40721	-2.2615			-1.69768	-2.40105	-1.75345	9
PSAT1	29968		7.38172	7.31179	2.06386	-6.19362	-3.62443	-1.57796	13.4769	27.9149	3.7878		9
RDH5	5959	-21.4667	-4.55835	-4.53241	-1.76606	2.21895	3.31922	-1.88651	1.96114			13.5907	9
RPL36A	6173		4.8066	5.12034	2.45469	2.47025	2.41299	5.28016	2.95539	3.80339	3.94265		9
SEC61G	23480	2.05919	1.53409	1.50127	3.44167	1.90825	1.75596	2.32531	2.15538	2.62927			9
SEMA6D	80031	-3.28196	-7.14112	-7.88184	2.43481	-8.34656	-8.92124		-4.21763		-2.92874	-1.93195	9
SHMT2	6472	1.75067	2.79038	2.85515	2.1331	3.58714			3.00986	4.15168	2.43014	1.67813	9
SLC19A1	6573	2.03188	1.88076	1.77286	3.48396			1.84929	-1.74508	-1.95835	1.81124	-1.68963	9
SLC22A3	6581	-7.50062	4.42789	4.48141		-4.08993	-3.25656	-1.8781	-1.70165	-4.99123		-1.78475	9
SLC25A15	10166	1.6684	2.10512	2.05242	1.5753	-2.15882	-1.88733		2.07346	2.21529		-3.2575	9
SLC27A2	11001		-1.54662	-1.64422	-2.01876	-2.09155	-2.86056	-1.73367	2.00811		1.89137	1.76463	9
SLC2A1	6513	2.6552	3.32872	3.34374	4.49573	3.60373		3.90412	12.6414	53.9412	2.28178		9
SMS	6611	2.04505	1.9117	1.93792	2.68807	-1.6244		1.89603	1.77374	2.79612	2.66042		9
SNRPB	6628	2.2454	2.17929	2.1876	2.22563		1.78793	3.64281	1.82494	2.72173	2.45322		9
SNRPF	6636	1.75916	2.22637	2.2492	1.91315		1.81136	2.08955	1.81182	2.47986	2.66126		9
SORD	6652	2.99641	3.15013	3.20769		-4.79571	-5.66053		2.82642	4.66306	2.06925	-2.38879	9
SQLE	6713	4.57059	3.27774	3.65155	2.44417	-1.77717	-2.26511	4.98757		1.92649	2.26729		9
SRM	6723		2.29156	2.31632	1.76776	1.69475	1.68884	2.73015	2.23585	1.96374	2.16327		9
TBCE	6905	1.85952	1.54138	1.56458	1.68598			3.55372	1.76183	1.87061	2.04486	-1.53106	9
ABCA1	19	-2.63748	-1.70077	-1.69024	2.28322	2.71472	1.78767		-1.80439		1.90223		8
ABCG1	9619	1.8268	-1.56745	-1.64439	2.2967	2.24448		2.34946	-2.39759	-1.83628			8
ACADM	34	-1.65021	-2.11156	-2.1125	-2.10676	-3.03437	-2.78737	-1.5711				-1.61045	8
ACADSB	36		-1.59135	-1.52927	-2.39969	-4.19744	-4.51981	-2.18082		-1.64538		-1.70539	8
ACAT1	38	-1.86088	-2.29814	-2.29722	-1.99103	-2.58045	-2.01728	-1.75642		-1.82711			8
ACYP1	97		1.95312	1.98879	2.33388		1.79929	4.44573	1.5197	2.149	2.63586		8
ADCY3	109	-1.52517	2.33867	2.29977	2.18805	1.88181		2.19602		1.5675	2.30342		8
AGMAT	79814	2.48275	1.57222	1.52171		-5.58184	-11.629		8.63283	6.51552	2.34588		8
AGRN	375790		2.26494	2.3162	3.95333			3.22053	1.59228	1.60624	4.60002	1.9921	8
AGT	183	2.81912	4.39108	4.0306	-2.57817	2.011			7.14149		5.01398	2.27234	8
AHCYL2	23382		-5.85984	-5.81825		-1.96065	-1.86455	1.59312		-5.17501	1.67042	-1.94532	8
ALDH3B1	221				-2.29577	1.55762	2.07902	2.56017	-1.72746	-9.49393	1.63349	5.58852	8
ALDOC	230	-4.09817	1.60146	1.77972	2.05906	4.54927			1.88262	3.39935	-1.90264		8
ALG8	79053	1.83004	1.76281	1.73967	1.71268			1.96007	2.0622	1.71722	2.90528		8
AMY2B	280	-2.47184	1.5182		-9.23003	3.36863	2.0091	2.44713		-1.98427	2.13972		8
AOC3	8639	-15.8555	-4.7289	-4.4245	-2.40441		-5.79174		-5.67937	-12.0301	-2.64787		8
APOC2	344	2.66614	3.96956	3.59521	4.92243		3.22593		-2.22852	-3.12846		1.98403	8
B3GNT4	79369		2.97101	3.11431	4.88496	3.23128	-2.10238		10.8427	15.4714	4.03747		8
B3GNT8	374907		-2.7542	-2.94654	-1.54116	-2.86767	-2.1025			-2.28678	-2.11587	4.35908	8
B3GNTL1	146712	1.61426	3.22454	3.20317		2.35553	3.45256	4.80373	2.58942		3.05835		8
B4GALT6	9331	-2.3943	1.51078	1.7354		-1.83272		2.37735		2.42846	1.80667	2.53795	8
BDH2	56898	-1.84806	-1.60036	-1.64854		-2.11454	-1.70813	-1.6725	-1.51559	-2.31803			8
CAD	790		2.86931	2.85502	2.21035		1.51828	4.45361	2.36467	3.15269	3.36381		8
CAT	847	-4.1796	-1.74677	-1.77413		-2.64591	-3.08266	-1.74838	-3.54644	-4.17802			8
CCT2	10576	1.62667	2.00936	2.07933	2.04243			2.23752	2.06723	2.36145	3.02147		8
CCT3	7203	2.09793	2.11531	2.12059	1.78889			3.4676	2.7143	2.69833	2.20175		8
CCT5	22948	1.76479	1.86331	1.8648	2.32831			2.64969	2.59186	3.59328	2.72655		8
CCT6A	908	1.67386	2.47783	2.47611	2.3079			2.87086	2.34983	3.24275	2.9913		8
CD44	960		2.61353	2.71489	2.08677	2.35057	2.4649	2.55477	-1.92222			2.24989	8
CDO1	1036	-12.8397	-2.91656	-2.5071	-2.43353	-3.6987			-6.13171	-7.76709	-2.26924		8
CHPF2	54480	1.66761			2.23341		1.734	2.03152	2.18347	1.59418	1.77641	1.50224	8
CHST15	51363	1.52338	-1.84542	-1.67449	2.78148	2.88053		1.6041	2.09827		-1.63596		8
CHST1	8534	3.64951	2.15905	2.08558	2.98421	2.60131	-2.56234	4.80504			4.07537		8
CLNS1A	1207	1.66348	1.77081	1.76137	1.70037			1.65028	1.73712	2.34633	2.11442		8
CPT1B	1375		1.73253	1.66041	-2.87387			2.99329	3.21346	3.28678	1.76661	1.56885	8
DCPS	28960		1.62472	1.72311	1.53545		-1.82917	1.54594	1.70464	1.52987	1.60873		8
DHCR7	1717	2.00436	2.44357	2.57905	2.59798	-1.81538		1.58569		2.34952	2.38243		8
DNMT1	1786	1.89234	2.09125	2.13618	2.63114			4.05123	1.98202	2.38746	3.36005		8
EIF3C	8663	1.61195	1.79341	1.83032	1.89479			2.53578	2.49501	2.94608	2.7086		8
ENO3	2027	-18.2901	2.12265	2.06772	-24.0853			-2.37496	9.81477	2.09309	1.84078		8
ENOPH1	58478	1.5986	1.9875	2.072	1.53614			2.17931	1.53986	1.81321	2.29843		8
ENPP2	5168	-6.4994	-2.2905	-2.32848		2.88874	-2.11468	2.1539	-2.32241	-4.62275			8
ENTPD2	954		1.81773	1.73138		2.24366	2.9559	5.88887	5.2673	5.80744		9.68367	8
EXOSC4	54512	2.5781	2.15202	2.1082	2.19596			2.94091	2.21897	2.77952	1.91005		8
FADS2	9415	2.69064	3.41795	3.68314	-2.37189	1.69099		2.09208		1.67488	2.50481		8
FLAD1	80308	2.19742	1.57743	1.56396	1.84431			3.13714	2.85756	3.00787	2.1187		8
G6PD	2539		1.62794	1.59817	2.09646		2.65367	11.2666	2.68467	3.48556	1.67352		8
GAD1	2571		64.5363	79.9557	7.46722	-2.02991	-6.36986		18.3129	27.0773	41.2645		8
GALNT6	11226	2.775	4.47864	4.26114	3.25806	-2.70083	-2.21861		3.84403	2.25307			8
GAPDH	2597	1.9375	1.61443	1.663		2.55987	2.03043	2.43107	3.57059	5.82786			8
GCAT	23464	1.94161	1.67102	1.75076		-2.39875	-1.67043		2.35009	3.19291		-1.52465	8
GEMIN6	79833	1.69541	1.92812	1.94728	1.97022			2.2841	2.14638	2.14397	1.83842		8
GLA	2717	1.58086	2.11495	2.08036	2.28713		1.59892	3.48887		1.55296	2.20041		8
GLS2	27165		10.8966	11.9912		-2.40625		-2.72606	1.82796	2.074	2.93453	3.52794	8
GMPS	8833	1.63253	2.12431	2.1832	2.70133			2.58374	1.94285	4.0942	2.57856		8
GNAI1	2770	-5.86294	-2.41896	-2.32674	2.22945	-2.56839		2.12311			-1.64689	-1.92911	8
GPT2	84706	-1.68479	3.33829	3.2363	-2.45094	-2.38864	-2.42278		11.5366	7.28235			8
GPX2	2877		2.20236	2.13024	2.07904	-3.19055		2.46414	69.2829	126.569	1.75039		8
GRHL1	29841		7.14425	6.90029	-1.75326	-3.09498			3.22034	7.3651	-2.50118	1.76829	8
GSTO2	119391		1.73935	1.78465		-3.64289	-1.54171	3.34854	1.73731	2.22806	2.07615		8
HK3	3101				4.7167	6.76301	4.94631	-1.62023	-3.10066	-4.52368	4.14795	1.91481	8
HMOX1	3162		-2.80224	-3.0472		4.77235	2.79623	-1.63149	-2.5902	-2.1727		1.87393	8
HS6ST2	90161		12.5851	13.8366	1.83907	-86.0797	-18.574		13.993	8.62195		11.3537	8
INMT	11185	-5.93189			-3.30373		-3.40116	-3.67641	-10.5679	-28.2013	-1.98775	3.23351	8
INPP5J	27124	1.55234	-1.83788	-2.11539	-1.82467	-4.46275	-10.7496	10.0695			-1.53337		8
ISYNA1	51477	1.85373			2.11036	-1.65414	-1.57495		2.50297	2.39661	3.10242	2.76356	8
KCNJ11	3767	2.25812	2.8409	2.87754	-3.71627	-2.0463		5.67847	1.81325		3.02847		8
KIFC3	3801		2.49629	2.62854	2.24911	-1.57694	-1.71819	2.03904		-1.53188	1.9046		8
LBR	3930		1.57381	1.61832	1.73394			2.28256	1.56093	1.78225	1.59258	-1.63971	8
LPCAT2	54947	-2.4836	2.05389	1.98266	2.04946	-2.0905	-1.9928	2.90573			1.82789		8
LPIN3	64900		1.64708	1.53666		2.6329	2.12081	2.18844	1.80643	2.25402	1.90134		8
LPL	4023	-27.0197			-3.64438	-2.45458	-6.98724	8.78222	-4.18637	-13.5554		6.19701	8
LYPLA1	10434	2.00882	1.66147	1.70645		-1.82082		1.61284	1.98242	2.17577	2.18179		8
MAN1A1	4121	-1.63776	-2.25396	-2.39985		-3.27597	-4.01515		-1.61591	-2.47597		-2.52264	8
MAOA	4128	-10.6691	-3.64186	-3.60597		-1.86911	-1.55992		-1.69742	-2.34031	-2.12476		8
MAOB	4129	-1.77233	-3.89554	-3.80754	-2.20838		-1.52721		-2.69841	-4.11144	-2.52931		8
MARS	4141	1.54231	1.80017	1.80617	1.60377			2.53083	1.9199	2.06567	1.67617		8
ME1	4199	-3.27151	2.0935	2.44653				3.20166	1.562	3.95094	-1.60616	-1.63589	8
MLXIPL	51085	-12.5206	8.39234	7.49409	-3.21134	1.6972		1.74518			3.93202	3.59204	8
MUC13	56667		-1.53468	-1.5646	-12.9511	-6.28402	-6.75212	58.7413	69.5967		1.78546		8
NAGS	162417	1.60097	-1.61497	-1.77436	3.79874	-2.02619	-3.98598	1.55679		-1.51016			8
NME2	4831	1.55895	1.85701	1.87108	1.65813		2.32474	2.87587	2.41082	2.80823			8
NME4	4833	1.81749			1.82974	1.57785	1.51871	1.52582	2.86062	2.32354	-1.66682		8
NNMT	4837	-1.55815	2.06448	2.12018		13.581	7.82435	-3.39187		-2.85069	2.27759		8
NOP56	10528	1.54879	2.9387	2.96447	1.9521			2.98257	1.89762	2.72944	2.99346		8
NPR1	4881	-12.7037	-3.25995	-3.17442	-1.58104	-1.78845			-5.82743	-14.8077	-2.52293		8
NUDT5	11164	1.77849	1.93633	1.94475	1.96487			1.9425	1.86882	1.80147	2.3707		8
NUP62	23636	1.56526	1.58898	1.60567	1.95645			2.39192	1.61032	1.97249	2.15336		8
NUP85	79902		1.82399	1.84717	2.15548		1.71537	2.26782	1.97492	2.0997	2.29497		8
ODC1	4953		1.98665	2.15085	4.98885	-1.73676	1.61849	1.87039		2.55549	2.18848		8
P4HA1	5033	1.8797	1.98282	2.02308	3.53858	3.01719			1.98903	2.27871	3.24126		8
P4HA3	283208	6.49912	5.91316	6.18731	6.88061	7.02631			6.40191	2.14397	8.24428		8
PDE1B	5153	-3.70157	-2.12221	-2.06339	-1.54129	2.97322			-2.90843	-4.79474	-2.29154		8
PDE5A	8654	-1.93578	-3.4388	-2.90146			-1.99787		-3.47432	-4.05361	-2.08122	5.21704	8
PDE9A	5152	-2.202	-5.33057	-5.34259			-1.75293	2.25645	1.67359		-1.83211	3.02689	8
PDK4	5166	-12.0004	-8.12131	-8.02511	-12.7006		-5.19065		-5.22795	-14.3623	-5.25671		8
PFDN2	5202	2.10922	2.24867	2.25066	2.20198			2.32885	2.07302	2.38865	2.12202		8
PIGL	9487		1.88018	1.84928	2.37695	2.25024	2.44148	2.40801	1.82306		1.82118		8
PIGU	128869	1.80801	2.03559	1.93492	1.66578			3.42957	1.88839	2.06314	2.63725		8
PIK3R5	23533		-1.79759	-1.8249	1.72578	6.91674	4.37691		-2.21284	-3.55482	1.80126		8
PIK3R6	146850	1.60589		-1.58887	1.85815	12.8002	5.40638			-1.82959	1.9202	1.66816	8
PIP5K1B	8395	-2.15689	-1.97033	-2.02878		-3.71797	-1.87354		-4.92141	-6.17189	1.63237		8
PLA2G4F	255189	2.80562	-1.51891	-1.60601		-6.88525	-8.1503		-5.75689	-5.56593		-2.42306	8
PLAUR	5329	3.2247	1.51825	1.64003	2.70823	2.63281	2.26429				2.65942	2.98122	8
PLCE1	51196		-4.05679	-4.12343	-1.60485	-2.31853	-3.01179	8.01652	-2.7866	-3.0068			8
POLA2	23649	1.82836	1.8739	1.9136	2.61436			4.11651	1.88823	2.53521	2.25093		8
POLR3K	51728	2.74327	1.91731	1.95373	1.84469			2.22212	1.76588	1.83719	2.14111		8
PPAP2B	8613	-4.08287	-2.51033	-2.56702	-1.87188		-2.53964	-1.97422	-2.46795	-2.90588			8
PPAT	5471	1.75185	3.54613	3.63323	2.30715			2.13701	4.28519	5.10718	4.03368		8
PRIM1	5557	1.60556	1.97558	2.05128	2.58485			4.67181	2.14951	2.81886	3.18438		8
PRKAA2	5563				-5.31041	-1.78417	-2.39696	6.03543	2.34316	1.53979	-3.06546	-1.64909	8
PRPS2	5634	1.59668	1.68963	1.70338	1.57516	-2.2091	-2.08814		1.90224	2.38356			8
PSMD14	10213	1.69129	1.93941	1.99337	1.84051			2.3435	1.88985	2.43457	2.3152		8
PSPH	5723	2.06819	3.03142	3.06856	2.57044			4.87578	2.60584	5.28251	2.37364		8
PTGES	9536		2.13905	2.05002	1.61359	-2.13576		12.1736	8.76711	5.21886	2.03557		8
PTGIS	5740	-4.13015	-2.14775	-2.08287	-2.8996		-2.33151		-2.21081	-4.34932		-1.85396	8
PYCRL	65263	3.23081	3.00292	3.0062	2.52728			3.09568	2.81072	2.99491	2.99706		8
QPRT	23475	2.56157	1.9441	1.93748	2.38058	-2.56287	-1.62162		3.23253		2.25275		8
RAE1	8480	1.84531	2.84113	2.75545	1.93855			2.35367	1.82688	2.99864	2.6511		8
RAPGEF4	11069		1.92904	1.84548	1.66438	1.82999	-5.9236		-3.85682	-3.16048		1.51412	8
RNPS1	10921	1.66846	1.7144	1.71206	1.81342			2.04968	1.59797	1.80405	1.85257		8
RPL26L1	51121	1.93687	1.63767	1.67089	1.75446			1.99536	1.58896	1.70162	1.96112		8
RPL37	6167		1.70311	1.67633		1.91594	1.7634	2.27838	1.9427	2.03534	1.52132		8
RPL39	6170		1.92693	1.91094	1.54446		1.96584	2.54817	1.64051	1.65587	1.58212		8
RPN2	6185	1.66155	2.17756	2.14065	1.89702			2.19135	1.80111	1.78609	2.39574		8
RPS19	6223		1.86016	1.84006		2.44867	2.41753	2.75707	1.60831	1.99613	1.6428		8
RPS21	6227		2.30155	2.27347		1.72204	1.63494	2.8758	1.57855	1.63561	1.73405		8
SDC4	6385		1.77549	1.6864	1.54983	-1.65927		-1.55701		-2.49451	2.16789	4.7779	8
SLC16A3	9123	4.80361			2.34201	7.79674	4.39414	5.48931	2.80287	1.8185	2.48596		8
SLC25A20	788	-1.72649	-2.81866	-2.98512	-1.60878	-1.84397	-1.64973			-2.24218	-1.50091		8
SLC25A4	291	-1.5887	-1.92232	-1.72162	-7.17785	-2.44514	-2.16474			-1.64149	-2.76156		8
SLC2A5	6518		-2.82639	-2.8854		3.1928	-2.98786	45.2991	7.0283	4.37473	-7.11608		8
SLC44A4	80736	5.45789	-2.58873	-2.65548	-5.54744	-4.08547	1.73224		1.71136	-4.18541			8
SMARCD3	6604		-2.01094	-1.88164	-2.46863		2.02338	4.60718		-1.59603	-1.67859	1.63901	8
SMOX	54498		5.19231	5.35631	2.40334	2.01169	1.66381	2.77036	3.0659	3.9671			8
SNRPD1	6632	1.74652	1.79807	1.91709	2.00661			2.66131	1.88899	2.79466	3.43814		8
SNRPE	6635	2.09763	2.07801	2.10596	1.91983			3.40889	2.2799	2.67378	2.32944		8
SNRPG	6637	1.84046	1.74213	1.80334	1.92792			1.97661	1.857	2.67551	2.62883		8
SRPRB	58477	1.61529	1.85763	1.88462	1.51873			1.9417	2.03795	2.64453	1.91649		8
STX1A	6804	2.8259	3.59967	3.92922	4.43161		2.12036	5.82516	9.85959	4.37546			8
SULT2B1	6820	1.78983	9.17511	7.98944	-2.28803	-14.7074	-4.74374				-2.64304	3.45251	8
TAZ	6901		1.98228	1.9594	1.70165	1.76	1.704	3.1205	1.51601		1.87183		8
TEAD4	7004	2.06856	5.18017	5.14363	1.67515	1.56301		3.09375			4.31159	-2.05085	8
TGS1	96764		2.32922	2.3045	1.97205	-1.63743	-1.62725	2.13622		1.68188	2.524		8
TIMM10	26519	1.56721	1.53095	1.54577	1.50547			1.76736	1.75475	2.01665	1.71105		8
TOMM40	10452	2.13616	1.803	1.83209	1.86289			2.9137	1.87163	2.68877	2.88305		8
TSTA3	7264	3.20609	2.21262	2.25858				2.33026	2.74397	1.93918	1.61727	1.81493	8
TUBA1A	7846		-1.91502	-1.77233		1.826	2.29239		-1.83835	-1.85991	-1.74502	1.63797	8
TUBA1C	84790	2.91235			1.75805	1.50929	1.83847	2.6122	2.31902	3.74521	1.70294		8
TUBB2A	7280	-1.5652	-1.84138	-1.66679		-2.41218		1.9635	3.08759	2.49527		-1.54524	8
TUBB6	84617	-2.26689	-2.08784	-1.97642		1.86727	1.60287	1.56046	-2.18339		-2.04232		8
TUSC3	7991		-2.48826	-2.17209	1.99151		1.91089	2.59653	1.50094	2.34417		8.16088	8
TYMP	1890	3.39921			3.4916	6.89895	4.56071	2.09589	1.64492	1.6052	3.04658		8
UGDH	7358	1.7781	-3.14916	-3.1854	1.74096			1.8413	3.92265	2.97267	1.5112		8
UST	10090	-2.39976	-2.69744	-2.16549	1.79096	-2.79166	-2.13986		-2.12028			-1.79711	8
XDH	7498	-2.19986	-4.61377	-4.69573				-1.67282	22.6833	16.2292	-2.90916	5.4446	8
ZFP36	7538	-4.59758			-2.20412		-2.20763	-2.79314	-3.42022	-5.25579	-2.43655	-2.04743	8
ABHD5	51099	-1.75852	-2.04942	-2.18272	-1.69012	-2.07712			-1.75503	-1.75041			7
ACADS	35	-2.67386	-4.76817	-4.85733	-1.59785			-2.23593		-1.5363	-1.59071		7
ACHE	43		-1.82137	-1.7639	-3.72223	2.19028	5.63009		6.07498			-1.94286	7
ACP6	51205		1.82554	1.86413		-1.59101		2.31228	2.42297	1.56547	1.98264		7
ACSL1	2180	-7.27668			-1.81613	-1.88033	-2.44389	-2.34106	-1.76511	-2.3124			7
ACSM3	6296	-4.31328			-4.5933	-3.06114	-2.17546	-2.74105		-3.63379	2.8251		7
ACSS1	84532		1.6564	1.51354		-1.92686	-2.0339	3.21472			1.58997	-1.52065	7
ADHFE1	137872	-4.39018			-4.77973	-2.65534			-1.6059	-2.11413	-4.58558	-1.62734	7
ADSS	159	1.74693			1.59633	-1.72063		2.08282	1.59253	1.90148	1.94451		7
AFMID	125061		2.01945	2.00355		-2.40003	-2.07733		1.5165	1.63664	1.61507		7
AGK	55750		1.70558	1.70249	1.60243			1.86324	1.56356	1.75694	1.59254		7
AGPAT4	56895	-1.56068			2.32653	-1.85003		4.54277	-2.12505	-1.61375		-3.69489	7
AGPAT9	84803	-3.41747	-5.41022	-5.37526		-6.1884	-9.44403				-2.74131	-2.11826	7
AKAP5	9495	2.43639	-2.45032	-2.48066		-2.92287			-1.63782	-2.78819	2.84858		7
ALDH1A1	216	-5.8149	-1.79301	-1.6702	-1.7795		2.20608		-1.82989			-2.60635	7
ALDH1A3	220	-3.50942	1.68397	1.79815	-2.15772	-3.21709					1.71452	6.40973	7
ALDH2	217	-5.00775			-1.6983	-1.95301		-2.18301	-2.09407	-4.15373		-1.73544	7
ALG10	84920		1.59811	1.63122	2.00234			1.5938	1.78084	2.65135	2.6056		7
ALOX15B	247	-3.09187				21.9163	71.1454		-1.59204	-7.62891	-3.49117	8.31398	7
ARSE	415		1.70755	1.64753	3.95029	1.57738			4.79095	-2.12475	4.02399		7
B3GNT3	10331	-1.86908			-1.52311	-1.80256		6.48733	22.2993	7.83805		60.8892	7
B3GNT5	84002	-1.63957	-1.61999	-1.57261	1.59386	1.80546		3.15269		2.90965			7
BGN	633	4.85552	7.25924	7.2696	4.02165	1.96978					8.61828	1.678	7
BST1	683	-2.30695	-1.99712	-2.13784					-2.1934	-2.68411	-1.67242	-1.58459	7
CA9	768	62.0214	100.185	110.189	72.1091	57.1976			80.2196	75.5418			7
CBR1	873		-1.52208	-1.5984		-2.21017		1.67736	3.43213	4.00426	-3.56327		7
CCT4	10575		1.95877	1.99261	1.80744			2.16849	1.58479	2.85868	1.95897		7
CCT7	10574		1.86115	1.88077	1.65258			1.95452	1.5769	2.12939	1.7079		7
CH25H	9023	-2.25001			-2.35351	-2.80568	-4.01198			-2.48635	-1.74833	1.6137	7
CHST2	9435	-1.55516			7.08298	1.5987	-1.97373		1.55668	3.76718		4.33002	7
CHST7	56548	-2.35898	-1.59432	-1.6013	5.01266				-1.68978	2.35763		1.78222	7
CKB	1152		-3.57311	-3.45873	1.76707	-2.1445		6.86676			-4.08977	-1.6328	7
CKMT1A	548596	2.76755	-2.24746	-2.34824		-2.54273	1.87973		8.87294	21.0015			7
CKMT1B	1159	2.80515	-2.17866	-2.18509		-3.15969	1.62491		7.32151	22.425			7
CKMT2	1160	-14.8617	13.5523	14.0614	-13.1398	-1.76137	-4.62786				-6.41811		7
CPOX	1371		2.03487	2.04293	2.03304		1.65894		1.98004	2.96765	2.20973		7
CTGF	1490			1.58246		-2.47766	-3.64558		-2.8948	-3.31046	1.65707	-3.21217	7
CTSA	5476		-1.51247	-1.65562	1.779			2.96112	1.65765		2.04624	1.81036	7
DGAT2	84649	-10.9329	3.73439	3.60769	-3.76803	-1.92664			2.0014		1.64251		7
DHDH	27294	2.9239			2.62395	-2.5358	-3.38951			-1.76027	-4.84324	11.4776	7
DIO2	1734		5.16875	4.63714	-1.99538		-3.24478		5.01602	11.0818		-2.76584	7
DOLPP1	57171	1.53539	-1.72561	-1.82316	1.75892			1.54355	2.01062	2.20065			7
DPM2	8818	1.95197	1.93896	1.87678	2.04149			2.49828	1.6481		2.01486		7
EARS2	124454	1.53107	1.68457	1.68893				1.63418	1.84138	1.6947	2.29555		7
EIF3B	8662		2.33773	2.31987	2.02693			2.36334	2.08023	2.36585	2.26262		7
EIF5A2	56648		2.52884	2.86612	4.8622			4.64597		3.84715	1.62721	-1.77892	7
ELOVL6	79071		-1.81179	-1.73464	-1.72267	-1.75989			3.14832	3.21193		1.90883	7
ENO1	2023		1.79556	1.83675	1.90504			2.26133	2.51203	2.5303	2.03213		7
EPRS	2058	1.62786	1.61179	1.62303				2.7862	1.96615	1.77645	2.24045		7
EPT1	85465	1.85923	1.58974	1.59819	1.64323				2.51272	4.41373	2.15347		7
EXOSC2	23404		2.13928	2.17829	2.16493			2.01395	1.60573	2.18681	2.10559		7
EXOSC3	51010	1.77973	2.0282	2.0078	2.09525			1.85967		2.39653	1.83967		7
FABP6	2172	37.2235		-3.87856	3.52608	52.61	53.614		-1.55735		4.48436		7
FAR2	55711	1.54463			-3.36157	1.94397			-2.41552	-2.85406	3.54916	1.53223	7
FBP1	2203	2.11263				-5.23361	-6.92258	-2.8038	-2.85229	-8.67669	-2.26493		7
FBXL5	26234	-1.63123	-1.68845	-1.5736			-1.60603		-1.55562	-1.8396		-1.60425	7
FMO1	2326	-1.82423			-1.99374	-1.95427	-2.0521	8.8155	3.29343		3.94636		7
FMO2	2327	-10.1286			-8.7593		-1.94647		-9.20925	-8.93029	-2.59906	-4.57954	7
FMO4	2329	-1.54867	-3.16999	-3.43964		-2.82396	-2.65764			1.53716		-1.54141	7
FTH1	2495		-1.62718	-1.7084	1.84386	1.64854	1.57711	2.14251				1.65272	7
GAL3ST1	9514		-1.66101	-1.69327		7.12792	1.74315	9.78126	2.03968	-2.63763			7
GALNT5	11227	3.13252			-2.37998	3.31697	13.121			-2.26539	2.11946	11.1515	7
GAMT	2593	1.59063	-1.67498	-1.57741	-3.05499	1.50773			2.37321	3.36436			7
GART	2618		2.13108	2.11792	1.76533			1.75176	2.0294	2.27968	2.46447		7
GCNT4	51301	-2.31087				-3.65114	-3.13065		-2.20314	-2.39169	-3.88711	1.65696	7
GGT6	124975		-3.30144	-3.38859	-2.87621	-34.5922	-16.5698				-1.82611	8.88896	7
GNA15	2769		2.27691	2.3725		3.12896	2.68681			1.92945	-1.98731	1.83303	7
GNAO1	2775		-8.62259	-7.21358	1.91282			-2.95492	1.7723		-3.51811	1.73456	7
GNE	10020	-1.83905	-1.7976	-1.68758	-2.24631			-1.88278			2.10873	-1.58825	7
GPC2	221914	3.63659	3.25673	3.31026	7.53794		6.87234		14.0607	12.2727			7
GPI	2821		1.6156	1.6265	1.57018			2.08687	2.36461	4.03622	1.71243		7
GSTM5	2949	-9.11899	-7.58367	-6.85697		-2.80413			-5.26801		-4.70647	-5.49367	7
GUCY1A3	2982	-1.98839	-2.08681	-1.71884	2.24669	1.60478			-1.70049	-2.47889			7
GUCY1B3	2983		-1.57357		2.81636	2.13167	1.67083			-1.51684	-1.54937	2.27694	7
GYG2	8908	-17.8435	2.09584	2.08482		-2.62034			5.34101	3.26009	2.41748		7
HDC	3067		-2.48705	-2.55633		3.99971	4.70841		-1.90173	-3.27217	-2.39573		7
HMBS	3145		1.57839	1.59608	1.54218			2.10869	2.44621	2.39375	2.32969		7
HMGCS2	3158	-2.27423	-5.13263	-5.5782	-18.8975	-6.33192	-18.8363	-1.53095					7
HPGDS	27306	-1.97279	-8.74052	-9.24181			2.44007		-2.54092	-6.98216		2.98176	7
HPSE	10855	1.99468	-2.06496	-2.04838					1.82731	2.05016	2.13664	2.30632	7
HS3ST1	9957		1.60716	1.68679	-3.12089	-1.77024	3.4269		3.14283	2.27422			7
HSD11B1	3290	-7.00882			-2.68516	-2.15552	-4.60504		-1.65457	-2.48482		-1.69952	7
HSD17B7	51478	2.29807	2.07889	2.11723		2.62321		2.36365	1.5187		2.02719		7
HSPA1B	3304		1.77862	1.59485		-1.68287		2.45212	1.69156	2.38205		-2.45129	7
HSPB1	3315	2.91799				1.56371	2.60242	4.84484	1.90827	4.16965	-1.72075		7
HSPD1	3329		2.92493	2.89934	2.02792			1.72183	2.63803	3.14818	3.92915		7
HYAL2	8692		1.64157	1.66884			-2.04281	1.90104	-2.34458	-3.30868		1.67031	7
LCAT	3931	-2.05329			2.12484	3.05636	1.99525	-4.41635	-1.58111	-1.95909			7
LDHA	3939		1.55174	1.52153	1.97906	2.9282			2.74723	2.81852	1.67309		7
LDHB	3945	-2.09958	2.03745	2.13385	1.85007	-3.1841			2.01889	1.84428			7
LIPG	9388		2.79661	2.84908	2.93254	-2.99984	-1.85561				5.62418	-1.87176	7
LPIN1	23175	-2.20991	1.65814	1.82593	-2.37798	-2.06896	-1.70426	1.78408					7
LSM2	57819		1.58919	1.64265	1.86688			2.88524	1.80733	2.1433	1.69138		7
LSM5	23658		1.87229	1.94163	1.96786			1.69719	1.73441	2.26478	2.23721		7
LTC4S	4056		-4.41887	-4.48662	-1.73666	2.31424			-2.94732	-6.36425	-1.82198		7
LUM	4060	1.5391	1.70433	1.91633	4.83916	-2.73345	-3.16345				2.2893		7
MARCKS	4082		-1.86388	-1.93852	1.76106	1.94062	2.24587	2.62674		1.87738			7
MBOAT1	154141	1.59639	-2.04522	-2.19097			-1.71875	2.09051	1.88109		2.12209		7
MBOAT7	79143	2.58031			1.95402			2.38904	1.70708	1.54947	1.62152	1.76137	7
MCTS1	28985		1.74471	1.72127	1.54714			2.01619	1.72444	1.64251	1.73314		7
ME3	10873	-1.91412			-2.08446		-1.53611	3.52676	1.76667	-1.94589		2.18775	7
MOCOS	55034		1.7223	1.72272	1.76687				2.31494	2.16256	2.09519	2.11945	7
MOGS	7841	1.54041	1.55077		2.16086			1.92754	1.69285	1.90717	1.58467		7
MTHFD1	4522		1.8295	1.87662	1.71038			-1.55409	1.6587	1.82153	2.43684		7
MUC15	143662	-2.91699			-3.70456	-184.332	-306.217		-1.51982	-3.01986	-5.24881		7
NAT1	9	10.3929	-2.55338	-2.57053		-1.52356	-1.84765	-1.56254			1.62886		7
NEU1	4758	1.6397	1.6139		1.85608		2.26255	3.5562	1.51376		2.23272		7
NFS1	9054		1.67649	1.58149	1.68934	-1.63035			1.74962	2.08696	1.82679		7
NIT2	56954		2.1306	2.08906	1.76242		1.85521		1.72253	2.66867	2.0723		7
NOS3	4846		2.0659	2.06383	1.5803		-5.92825			-1.90826	2.38675	1.87578	7
NUP107	57122		2.11788	2.13825	2.47775			2.74834	1.90641	2.33502	3.34937		7
NUP155	9631		1.92308	1.95392	2.3706			2.75911	2.84807	3.89878	3.09314		7
NUP205	23165		1.9782	2.01679	1.79685			2.70316	1.66531	2.47203	2.35913		7
NUP37	79023		2.02115	2.09967	2.11576			3.04842	1.79091	2.68168	2.58618		7
NUP43	348995		1.86182	1.84668	1.51357			2.43486	1.56299	2.00783	2.31556		7
NUPL2	11097		1.85355	1.86774	1.73644			2.40439	1.82492	2.12527	2.0579		7
OAT	4942			-1.5819		-2.4751	-2.66272		2.08352	1.61364	-1.61744	-1.5761	7
OAZ3	51686	2.59651				1.99843	1.63997	3.41664	2.45136		1.51637	1.83918	7
OMD	4958	-1.82541	-4.61617	-4.31201		-2.25024			-1.54719	-1.85231		-3.87975	7
PAICS	10606	1.85823	2.74931	2.78961	2.04949				4.01389	5.03986	3.17136		7
PCK1	5105	-38.5375	-6.21104	-6.31774		-7.36697	-12.0307	-3.11316			-5.18638		7
PCK2	5106		-1.7186	-1.85201	1.60659	-5.1088	-6.35642	-1.65928			-3.28126		7
PDE7B	27115	-3.17878			-1.53682	-1.98189	-2.90542	-2.02623		-2.3854	-1.89629		7
PDE8B	8622	-3.34222				-3.31492	-5.19863		-3.66639	-4.9158	-2.10834	-1.53801	7
PDP1	54704		2.03719	2.22738	1.63683	-1.72931			1.83541	2.06425	2.66835		7
PFAS	5198		1.75927	1.77565	1.68372			2.52333	1.79829	1.57694	2.87929		7
PFDN4	5203		2.86365	2.8573	2.07097			2.62241	1.873	2.27057	2.11189		7
PFKFB3	5209	-4.03879	1.63907	1.76991	1.50237	-2.65886	-3.66747				1.51892		7
PFKP	5214	1.52096			1.65401	3.6714	1.72985		4.95705	3.57878	1.7983		7
PGAP1	80055	-2.04457			1.63654	-1.66915	-2.51585	1.94989	-1.69257	2.24424			7
PHGDH	26227		3.15999	3.22679		-2.75132	-3.0631	-1.78239	1.76493	6.43795			7
PLCD3	113026	-1.62716	-2.79373	-2.82083			5.01806	5.18386			1.53333	9.87581	7
PLD6	201164		1.80444	1.96844	3.25468			2.18435	1.70722	2.15628	1.66529		7
PMM2	5373	1.95508			1.54228	1.94472	2.30739		2.25388	1.83017	2.16079		7
PNPT1	87178		2.29217	2.34503	1.81715			1.72412	1.72896	2.22719	3.02104		7
POLR1A	25885		2.17655	2.13693	1.70924			2.58487	1.68862	2.00803	2.52244		7
POLR1C	9533		2.46412	2.45529	1.50686			1.98509	1.98413	2.1355	2.61549		7
POLR2D	5433		1.9925	2.00864	1.88823			1.93028	1.88866	2.20044	2.02453		7
POLR2J3	548644		1.50593	1.5633		1.7624		2.57473	1.65576	2.92665	-1.50763		7
POLR3G	10622		3.46941	3.89809	1.65947			2.29972	1.86716	2.73973	2.82549		7
PPAP2A	8611	-3.48399	-3.56238	-3.5986		1.6905	-2.3277	2.16372		-1.51924			7
PPARGC1A	10891	-2.25628	-3.14451	-3.0694	-5.68584	-3.74179				-2.79265		-3.75387	7
PPARG	5468	-10.6663		-1.54472	-3.65341			2.37871	-2.84881	-3.84452	1.52263		7
PRKD1	5587	-2.87794				-2.24459	-1.80597	3.23775	-1.87433	-2.22458		-1.88077	7
PRMT5	10419		1.6714	1.73986	1.56655			2.01207	1.76717	1.93466	2.00424		7
PROC	5624		1.51511		8.78117	-4.45623			22.8748	8.2638	5.31939	5.31321	7
PSMA1	5682		1.58302	1.59624	1.7869			1.86122	1.50808	1.75733	1.90054		7
PSMA7	5688	1.6236	2.28549	2.21328	1.89849			1.81356		1.72249	1.95637		7
PSMB2	5690		1.55494	1.55733	2.25086			1.67505	1.6295	1.64182	1.85927		7
PSMB3	5691	2.08138			1.98381		1.76301	2.03535	1.91897	1.8823	2.00613		7
PSMD12	5718	1.67989	1.61722	1.66279	1.73654				1.77555	2.22111	2.14077		7
PYCR2	29920	1.6308	1.61946	1.62815	2.00115			2.8684		1.87216	1.67831		7
RDH10	157506		1.68862	1.68343		-3.47013	-1.90253	1.71751	2.7258	2.43301			7
RPE	6120		1.55779	1.558	1.57565			1.70145	1.88101	1.89764	2.15005		7
RPL30	6156		1.81769	1.79384	1.51443	1.75813	1.54334	2.79428	1.7097				7
RPL38	6169		1.64562	1.65868		1.78827	2.28693	2.63597	1.54452	1.55756			7
RPL8	6132		1.84242	1.82648	1.50973			3.28812	1.73314	1.79862	1.58485		7
RPS18	6222		1.52858	1.61149		1.70852		2.44079	1.68898	1.67279	1.8167		7
RPS2	6187		1.84893	1.82641		2.44658	2.33897	2.22408	1.83336	1.82912			7
SCARB1	949		1.84695	1.78427	2.06376	13.2821	4.21819	1.55573			2.18588		7
SCLY	51540		2.0838	2.07428	1.63835			1.53512	1.57695	1.70103	1.84455		7
SDC1	6382	3.36302			1.53639	-2.01393	-1.5553		1.89801	3.38684		2.05469	7
SDS	10993	4.64798			2.35361	26.291	22.5589			1.71923	10.3347	-1.65484	7
SEC61A2	55176	1.88548	1.71805	1.76495	1.91635				2.33058	2.63656	2.3334		7
SEPHS2	22928	2.18674		-1.57669	1.68412	-1.6648			1.86782	1.54486	1.79724		7
SGPP1	81537		-1.72516	-1.68792	2.48333	-2.59851	-2.31041			-1.67965	1.51295		7
SLC16A1	6566			-1.56525	3.45874	3.91511			2.28804	6.36236	1.57629	1.58467	7
SLC16A4	9122	-1.71309	2.00175	2.15433	-1.95523			-1.97452		-4.4245		1.51643	7
SLC19A2	10560	1.68969	1.98649	2.0638		-2.48604	-1.51982			-1.83402		-2.15512	7
SLC23A1	9963	5.03362	-10.8825	-12.576		-3.40353	-4.5489		-2.04434		-6.30384		7
SLC44A1	23446		-1.56459	-1.6081	2.59449	-1.63216	-1.56224			2.16841	2.22164		7
SLC6A8	6535		-2.08271	-2.09022	2.39174	2.89177		13.6291	4.00735	23.8084			7
SLCO1B3	28234		159.317	157.043	18.7987			-2.58852	193.753	59.9253	55.0291		7
SMG7	9887	1.55552	1.54267		1.88267			2.34503	1.60766	1.82418	2.06268		7
SMPD4	55627		1.7625	1.77042	2.0136			2.53096	1.64795	2.01017	2.20607		7
SNRPD2	6633		1.81784	1.87162	1.76249			3.1037	1.64442	2.24936	1.70956		7
SRD5A3	79644	1.88459	1.67028	1.77308				1.95796	3.42834	1.92865	1.91278		7
ST3GAL6	10402	-1.80297	-1.53267			-2.3763	-2.87669	-1.75742	-1.68441	-2.08118			7
ST6GALNAC2	10610	1.54818			2.30386	-3.1493		3.87149	-2.77305	1.95887		-1.63408	7
ST6GALNAC3	256435	-4.05995	-2.55271	-2.32392		-2.45687	-15.6907		-3.86321	-4.63584			7
STT3A	3703		1.5535	1.55185	1.59959			2.2472	1.87014	1.59175	1.99765		7
STXBP1	6812	-2.35	2.38798	2.49515	2.04768		-1.63272	2.63489		-2.7134			7
SULT1A2	6799		-16.8875	-18.1735		-1.8987		-1.51486	-2.00526	-6.72013	-4.43898		7
TBXAS1	6916		2.03349	1.99699		3.41656	2.89217		-1.51054	-3.22027	1.80447		7
TIMM50	92609		1.85788	1.85777	1.55471			2.4177	1.887	2.44971	1.90602		7
TIMM8A	1678		2.19369	2.16606	1.57763			1.86124	2.66109	3.42443	2.72938		7
TM7SF2	7108	-1.51373	1.88016	2.04421	-2.96221	-2.28485		1.9245				1.58171	7
TNFRSF21	27242	-1.79028			1.50598			2.7408	4.28052	3.01111	2.14588	3.34495	7
TOMM5	401505		1.78431	1.81179	1.68684			2.04819	1.5045	2.16927	1.89443		7
TP53	7157		1.65987	1.64181			1.67135	1.69347	1.54332	1.74184	2.29456		7
TPI1	7167	1.82709			1.82756	1.83219		1.66762	2.34788	3.44791	1.55569		7
TUBA1B	10376	1.69238			2.32571	2.17253	2.25022	3.45048		1.5092	1.97504		7
TUBA4A	7277		1.64412	1.69671	1.7068			2.28103	2.18555	2.32523		1.84454	7
UGT8	7368				2.37365	-4.24504	-4.33275		5.15255	7.69678	2.43078	-2.81902	7
UPF3B	65109		2.34646	2.28008	1.789			3.14089	1.63054	2.4273	2.40338		7
UPP1	7378		-1.71048	-1.74037	1.91908		1.81136	1.52967	1.57272			4.15539	7
VAMP2	6844	-1.87972	-2.20585	-2.13638		-1.61229	-1.89821		-2.12036	-2.89618			7
WBSCR22	114049	1.66065	1.9225	1.94975				2.00224	1.8186	1.77169	2.25996		7
XPO1	7514		1.71556	1.75368	1.81449			2.23535	1.66543	2.35961	2.57658		7
ZNRD1	30834		1.82721	1.82949	1.60332			2.42972	1.6728	1.65621	1.82957		7
A2M	2	-2.23087	-1.96924	-2.00145			-2.65897		-3.33228	-10.1974			6
ABCB1	5243	-4.70186	-2.74778	-2.88129		-3.48983			-3.07676	-5.78878			6
ACAA1	30		-1.88186	-1.97479		-3.31048	-2.03173	-1.92958		-1.74171			6
ACAN	176		11.4179	10.0627	4.31365	5.75977			2.9899		19.6547		6
ACOX2	8309				-5.00979	-4.04777	-4.04595	-1.54113		-5.51416	-2.59882		6
ACP1	52		1.7041	1.70038	1.60233			1.66735		1.72617	1.91258		6
ACP5	54	1.80483			3.06804				-3.16202	-3.77758	2.3126	1.85209	6
ACPP	55				-3.00867	-61.1881	-62.3532			1.6154	-2.12572	1.74547	6
ADCY4	196883	-3.29723				1.56865	-6.75184	2.67127	-3.70502	-6.39542			6
ADCY6	112	-1.63284	-1.60107	-1.65236				3.96317		-1.92941	1.69252		6
ADCY7	113				1.88202	3.2553	2.78779	1.76365		-1.79949	1.88809		6
ADH1C	126	-11.438	-15.5941	-16.8694		-13.2661	-24.103	-2.04737					6
ADH5	128	-1.95325	-1.51506		1.88903	-1.62764	-1.70057					-1.57363	6
ADK	132		1.88551	2.03018	1.58202	-2.47297					1.54073	1.91791	6
ADSSL1	122622	-1.94073			-3.7562	4.79077	-2.56478		3.28329	2.5738			6
AGL	178		-1.53824		-2.33689	-2.22274	-1.51737	-1.80478				-1.52073	6
AK1	203				-2.06579	-1.96527		1.69165	-2.11383	-4.99618		2.20728	6
AK7	122481				-3.58526	-3.44949			-2.4401	-4.19919	2.25561	-2.77849	6
ALAD	210	-1.74252	-1.51244	-1.57266		-2.53309	-3.18655			-1.66212			6
ALDH4A1	8659	-1.97827	3.60449	3.66465		-4.64916	-3.71823			2.09035			6
ALDOA	226	1.95408				1.95798	1.88428	3.56602	2.48418	2.67172			6
ALDOB	229		-7.53631	-9.02743		-27.6782	-119.488	-1.96382			-19.6049		6
ALOX5	240					3.80296	5.56441		-3.37138	-6.70352	1.99156	7.34474	6
AMPD2	271		2.27647	2.25327	1.85852			1.7778	1.59288		1.91114		6
AMT	275	-2.29668	-2.09755	-2.29005		-2.53914	-1.64256			-1.52347			6
APIP	51074		1.52744	1.51758		-1.79853	-1.835	2.27156			1.55326		6
APOA1	335	6.73656	-247.881	-399.881			-2.58117	-1.8913			-9.61433		6
APRT	353		1.50754	1.5054			1.80093	1.85507	1.72739	1.60735			6
ASAH1	427				-1.58833	-1.73149			-1.68008	-3.58655	1.65339	-1.63186	6
ASS1	445	-1.70801				-6.94156	-9.90616	-2.26712	1.87482		3.12702		6
AZIN1	51582		1.66123	1.71986	1.61223			1.8634		1.63985	2.17369		6
B3GAT3	26229	1.79569			2.31195			2.29173	1.80503	1.56924	1.58925		6
B4GALT3	8703	2.19865			1.76292			2.75336	2.139	1.77215	1.54606		6
B4GALT7	11285		1.50558		1.63552			2.62094	1.75301	1.55078	1.60553		6
BCS1L	617		1.65289	1.64617				1.97879	1.8191	1.75748	1.54416		6
BDH1	622	1.51303	-1.86695	-1.91596		-4.35563			2.59935	5.16024			6
BPNT1	10380	1.72449	-1.58631	-1.63559		-1.70207		2.00393	1.68645				6
C1GALT1	56913		1.79499	1.85975				1.8808	2.0741		2.64643	-1.53696	6
CALR	811	1.89654			2.02485			2.03018	1.7494	1.55032	1.59329		6
CBR3	874					2.08535		6.90614	3.37283	6.94764	-1.65685	1.92669	6
CCT8	10694		1.83311	1.86213				2.012	1.55521	1.70868	2.36005		6
CD38	952	1.64452	-1.89566	-2.16994	2.68875	3.87634						-2.03822	6
CDA	978		-2.05561	-2.09192			-5.93669	-1.68607	5.90214			3.72454	6
CDK8	1024		1.7027	1.66854				1.54211	1.52926	1.83963	1.75908		6
CHPT1	56994				-2.51712	-1.6276	-1.57034		-1.62451	-1.68669		1.95796	6
CHST11	50515	2.38926			5.52947	2.98066	2.25043	3.20883				1.86585	6
CP	1356		-2.73544			13.7287		-1.93479	12.9073	3.33505		-2.18538	6
CRLS1	54675		1.68558	1.7071			2.19498	1.50079		-1.92825	1.95085		6
CSAD	51380		1.57434	1.53285	1.68075	2.72516			1.55271	1.68528			6
CSGALNACT1	55790	-1.82916	1.73938	1.82165			-2.76402			-2.38681		-3.9991	6
CSNK1G2	1455		1.5763	1.55404	1.64246			2.14053		1.69307	1.6805		6
CTPS2	56474	1.69379	1.91924	1.87601				2.09578	1.62524		2.03464		6
DGKA	1606		-1.65027	-1.63576		1.97392	2.53838		2.09201	3.97274			6
DGKZ	8525		1.72074	1.65477	1.6482	2.31738		2.59733		1.58309			6
DHFR	1719		1.58004	1.64015	1.68462				1.95583	2.24535	2.21855		6
DMGDH	29958	-8.85047				-1.96918	-4.33028	-2.02152	4.48061			-1.82106	6
DNMT3A	1788	1.7935			1.75344			4.21914	2.51737	2.51496	1.79596		6
DPM1	8813		2.1183	2.1055	1.60511			1.64044		1.75321	2.11386		6
DPP4	1803	-3.06673					1.7264	2.01078	2.63083	-2.72328		22.8984	6
EIF2S2	8894		2.59859	2.54459	1.81224			1.96766		1.72208	2.40336		6
EIF2S3	1968		2.19065	2.19305				1.99403	1.51553	1.6578	1.98019		6
EIF3I	8668		1.5763	1.60782				1.68744	1.6116	1.57524	1.54911		6
EIF4A1	1973		1.557	1.62792		1.57994	1.66418	1.54489			1.65596		6
EIF4A3	9775	1.6959			1.5467			2.097	1.71173	2.13567	1.93905		6
EIF5A	1984	1.53276			1.6108		1.53729		1.5594	2.06777	1.65699		6
ELOVL5	60481		2.12948	2.24436	1.57032	1.55731		1.79183				-1.8787	6
ENO2	2026	2.80672			8.17753	8.29324	5.08294		1.9201	2.56267			6
ENPP1	5167		-2.0136	-2.31889		-2.41043			1.80502		1.84765	-2.16052	6
ENTPD5	957		-4.92349	-5.09153		-1.90855	-2.6359		1.7205		-1.78803		6
ENTPD6	955		1.52293		1.67916			2.91311	1.9109	1.71594	2.54831		6
ENTPD8	377841	7.11149	-5.13241	-5.26924		-3.87214			30.4521			6.1544	6
ETNK2	55224	2.56409				-3.45678	-4.3079		3.04345	5.29448		2.59817	6
FABP1	2168		-5.31131	-5.9034		-27.5962	-72.4404	-1.5627			-7.35679		6
FABP4	2167	-29.0098					-8.48118		-26.8975	-9.22085	-2.87465	-2.65813	6
FBXO6	26270	1.92373			2.03789	1.82884		1.95036	1.56147		1.51326		6
FMO5	2330		-3.68389	-3.85784		-6.70067	-4.10375			-9.06884		1.86139	6
GALNT10	55568				2.36953			3.31316	1.51416	-1.86942	1.56072	-1.57767	6
GALNT12	79695	-1.79665	-2.41057	-2.40422	-2.50268		2.01499			-2.04888			6
GALNT14	79623	2.09774			2.05233	2.00498	1.62951		17.3361	22.0844			6
GALNT7	51809	2.22092					1.63995		3.44768	2.30735	1.85894	4.31979	6
GATM	2628				-2.33662	-4.77843	-3.43842		1.92471	2.04131		-2.23795	6
GBA	2629	1.78109	-1.55515	-1.60463				4.05812	1.62093		2.14559		6
GCNT3	9245		-3.98497	-3.88214	-4.58347	-3.96729			41.1791	5.81438			6
GEMIN7	79760	1.62905			1.59194	1.66771		2.3993	1.9013	1.87985			6
GK	2710	2.38265			-1.52261	-3.0058	-2.97864			-1.90162		-1.50917	6
GLCE	26035		1.57481	1.63056		-1.53807	-1.82259	1.69039			1.57799		6
GLO1	2739	1.60298	1.78521	1.85075	1.79301	-1.552		1.58056					6
GLS	2744		1.51583		2.68645	-2.18226		3.45771		-1.62288	2.11241		6
GMDS	2762	1.65571			-2.25299	-2.07035		2.27856	3.00764	1.99724			6
GMPR	2766		2.13255	2.14953	-3.1166	-5.73249	-3.19344			-2.329			6
GNA11	2767		-3.14351	-3.29455		-1.60524	-2.38346		-1.59738	-1.55233			6
GNA14	9630				-4.81003	-2.03247	-9.04995	-2.2804		-6.06003		-2.55757	6
GNG11	2791	-4.42519	-2.01283	-1.79135		1.76565			-3.1188	-7.63199			6
GNG2	54331	-4.28978	-3.47746	-3.1966		1.67278			-1.77701	-3.00432			6
GNG4	2786	6.54912	6.9833	6.48488				82.2533	23.0224	51.0198			6
GNGT2	2793		-1.76376	-1.7474	1.7915	1.51425			-1.95694	-3.09919			6
GNPDA1	10007		2.05622	2.04486	2.00843			2.70559		1.51124	2.0427		6
GOT1	2805		-1.58747	-1.55557	-1.91658	-2.25674			2.11517	1.82041			6
GPC3	2719	-6.09156				-15.6056	-14.1237	95.7318	-3.93174			-10.1593	6
GSS	2937				1.76256		2.22918	1.72018	1.85968	2.38042	1.84313		6
GSTM1	2944		-2.32382	-2.21259				-1.89279		11.7372	-1.98953	-1.74859	6
GSTM2	2946	-1.64015	-2.71787	-2.54695				-1.89392		4.71881	-2.07714		6
GSTM3	2947		-1.76716			-8.93161	-6.49583	1.99117		4.23868		-2.31511	6
GSTZ1	2954		-1.68658	-1.66576		-1.72264		-2.73319	1.64678	1.87387			6
HADH	3033	-2.52235	-1.8403	-1.86448	-1.68173	-3.6796	-3.31066						6
HGD	3081	1.95003	-2.24228	-2.12448		-1.86589			17.9034			-3.48846	6
HNRNPD	3184		1.55552	1.60469	1.7309			1.6096		1.56468	1.7139		6
HS3ST3A1	9955	2.90711	1.67902	1.9121	1.66177				2.01509	3.98573			6
HSD17B10	3028	1.67501	1.75053	1.75886		-1.64241			1.54146	1.87881			6
HSD3B7	80270				1.56866	3.76877	2.33117		1.73156		2.72098	1.64654	6
HYAL1	3373	-3.25236			1.77252	-2.29637	-2.20101		-3.73777	-7.89471			6
IDH2	3418	2.27931			-1.60886	-2.34997	-2.96995		2.57329	2.65901			6
INHBA	3624	9.48804	50.2308	57.4622	27.222	1.69119					15.2819		6
INHBB	3625	-2.12782	6.18788	5.47553		13.5408			2.25577			3.0526	6
INPP5A	3632		-1.77837	-1.71793				1.52863	-1.79412	-1.7219	-1.77252		6
ITPR3	3710	1.54285			2.71633		1.92958	6.13016			2.52859	1.58564	6
IYD	389434					-20.3104	-6.26964	-2.08303	2.57016		2.72562	-2.4266	6
KCNS3	3790	2.07033	-1.83991	-2.00354	1.83779		2.55844					2.76159	6
KHSRP	8570		1.51753	1.51938	1.65			2.08992		1.92565	1.75572		6
KMO	8564	3.10428					-6.26241	-2.28898	-2.39772	-4.39773	2.11314		6
KYNU	8942		2.23024	2.36272	4.24716		-1.8678			2.3281	2.33983		6
L2HGDH	79944					-2.83874	-2.22797		2.02369	2.61346	1.849	-1.53631	6
LCLAT1	253558	1.58142			2.22475			1.7334	1.74505	2.58964	2.21671		6
LDLR	3949			1.52038		-2.73133	-10.261	-1.77375	-4.1861	-3.03493			6
LPCAT4	254531		-1.75213	-1.75922				2.93331	1.53549	1.84202		1.58029	6
LSM4	25804	2.48239			2.04676			3.05545	1.62237	2.51244	1.80491		6
MAGOH	4116		1.53697	1.54626	1.92384			1.90922		1.63774	1.86745		6
MAT1A	4143	2.94535	9.87887	9.72392				-2.37123	3.01485	3.77815			6
MBOAT2	129642	2.70717				-3.31726	-1.97993		1.92634	1.90369		2.02953	6
MED14	9282		1.54243		1.56204			1.53494	1.61594	1.6019	2.29566		6
MED20	9477				1.67251	-1.99227		2.53857	1.89028	1.9741	1.91321		6
MED30	90390		1.59159	1.60191	2.7264			1.67564		1.75616	1.8446		6
METTL2B	55798		1.54047	1.56146				2.02324	1.63634	1.58294	1.88548		6
MGAT3	4248	-2.79576				2.29419	-3.7612		-7.84691	-3.52456		9.70495	6
MGAT4B	11282	1.59724					2.15011	1.92087	1.53186		1.54589	2.07859	6
MGAT5	4249		1.76411	1.79774		-2.63973	-3.5349				1.80928	-1.5286	6
MGLL	11343	-4.88865	-2.3176	-2.43629	-2.89527				-1.51946	-4.80426			6
MOCS1	4337	-4.5265	-3.02405	-3.49851			-2.17238		-2.32072	-3.06541			6
MOCS3	27304	1.61688	2.05237	1.94484				1.70755		1.91201	2.07363		6
MTX1	4580	1.90169			1.715			2.41977	2.05384	1.65254	2.67234		6
MTX2	10651				1.51504	-1.50688		1.89715	1.91011	2.23851	1.60315		6
MUC4	4585		-2.48726	-2.49409	-3.85128				5.91384	4.10218	4.43606		6
NANP	140838		2.68165	2.71572	1.7227			1.86616		1.908	2.49333		6
NCBP2	22916		1.86272	1.81092	2.46211			2.19276		2.75044	2.28976		6
NCOA6	23054		1.61532	1.51758	1.61156			2.33545		1.52809	1.99822		6
NDST1	3340	-1.56696		-1.50395			-1.78893	2.68821	-2.84989	-2.7983			6
NMNAT3	349565		1.56425	1.56645		-1.6805		2.08003		3.29611		-2.54303	6
NPAS2	4862		1.64592	1.57745			2.34134	2.60303	2.47898	2.74222			6
NQO1	1728		2.15428	2.00729	1.6188			40.1361	8.45901	6.49476			6
NUP35	129401		1.91318	1.96559				1.6358	1.57989	1.82316	2.22123		6
NUP93	9688		1.79964	1.80398	1.77873			2.72386		1.96673	2.02238		6
P4HB	5034	1.79801				2.40989	1.99646	1.77567	2.32741	2.0078			6
PABPC1	26986		2.24441	2.17464				3.09102	2.24238	2.345	2.02901		6
PAIP1	10605			1.52654	1.60355			1.67102	1.76169	2.13193	1.71534		6
PANK1	53354					-2.94512	-4.009	-1.92368	1.56179	1.50141		-1.70042	6
PAPSS2	9060		-3.65763	-3.71957		-1.68553			-2.63065	-4.57032		-5.8795	6
PDE1A	5136	-2.48387	-2.93891	-2.52986		-7.56259	-5.78544			-1.74124			6
PDE4C	5143		-2.15237	-1.95736					-2.01685	-5.67474	-1.932	11.4273	6
PDIA3	2923	1.69394			2.07245			1.85642	2.0363	1.7015	2.51001		6
PDK2	5164	-1.85731	-1.87846	-1.96014	-1.59465	-1.59399	-1.65369						6
PDK3	5165	1.60711	1.55662	1.50281	1.62895		-1.75309			1.82964			6
PFKFB2	5208					-3.702		4.04221	-1.59222	-2.06298	2.72791	-2.25013	6
PGAM2	5224	-5.04967			-17.8261	-2.73237	-4.77619	19.0533	2.95704				6
PGD	5226		1.50923	1.5471		-1.96161		1.95219	1.59164	3.01544			6
PGM1	5236	-2.43792	-2.75883	-2.81577	-1.91441			-1.55599		-1.78643			6
PGM3	5238		1.5878	1.63575	1.60375				1.77472	1.5841	2.40456		6
PHKA1	5255		2.81025	2.99032	-1.75626				3.55834	2.85061	1.56499		6
PHKG2	5261	2.05928			1.82533			1.66149	1.87598	1.5283	1.70868		6
PHYH	5264		-1.76764	-1.8703	-3.6151	-2.46304	-1.83846			-1.55726			6
PIK3CG	5294		-3.15965	-3.08341	1.8418	2.16571				-2.56587		-1.76239	6
PIK3R2	5296	2.08593						3.26082	1.57951	2.37165	1.51775	1.57462	6
PIP4K2C	79837	1.65834			1.80343	-2.88966	-1.62762	2.03217	1.67173				6
PIPOX	51268		2.78069	2.7237	6.46098	-8.46475	-14.3142			2.58937			6
PLA2G10	8399	8.09696	-3.79746	-3.847					2.60499	-3.91782		52.652	6
PLA2G2D	26279		-2.36456	-2.06133		10.9121	8.94773		2.45133			-3.01801	6
PLA2G4C	8605				-2.12533	1.83066		3.45459	-1.921	-2.76535	-1.51973		6
PLA2G5	5322	-2.82453	-4.32852	-3.83795					-2.25215	-3.53489	-2.21735		6
PLCB1	23236	-1.91303	1.55382	1.8476			-3.48884	4.96734	1.77401				6
PLCD4	84812		-3.23075	-2.86836	-1.82008	-1.98914	-1.60244				-4.14651		6
PLTP	5360	-2.67067			1.56569	1.65889	2.41605		1.8941	1.94492			6
POLA1	5422		2.24291	2.22946	1.72597			3.3913		1.79903	2.62867		6
POLE3	54107		1.62209	1.67482	1.91332			1.88784		2.16825	1.96964		6
POLR2H	5437	1.98243			2.52311			2.18183	2.4138	4.25121	2.06568		6
POLR2K	5440	1.78296	1.5578	1.64345	2.08279			2.93097			1.64513		6
POLR3D	661		1.62919	1.66012	1.5231				1.51755	1.62751	2.04796		6
POM121	9883		1.70369	1.68118	1.64647			1.82943		1.56499	1.96878		6
PRKCA	5578	-2.36272			1.96107	-2.52774		2.8406		-1.65753		-2.0166	6
PROS1	5627	-3.98772				2.06978	1.50582		-2.68699	-2.96003		10.2364	6
PRUNE	58497	1.53504					-1.66331	2.84115	1.57664	1.66449		-1.82244	6
PSMA5	5686	1.81178			1.68072			1.58554	1.76079	1.6206	1.8703		6
PSMB4	5692	1.76839			1.91573			2.63009	2.00377	2.02368	1.67002		6
PSMB5	5693	1.54259			1.66222			2.0195	1.75958	1.98047	1.54592		6
PSMB8	5696	1.64058			2.11592	2.78965	2.49265	1.74392			1.70894		6
PSMB9	5698	1.81897			3.85242	4.33536	2.98919	2.22824			1.85196		6
PSMC2	5701		1.64162	1.64155	1.81811			1.91849		1.83401	1.8003		6
PSMC4	5704	1.85717			1.68668			2.44543	1.85707	2.52081	1.91138		6
PSMD11	5717	1.64853			1.93456			1.88181	2.0009	2.91832	2.11694		6
PSMD3	5709	2.52811			1.87974			1.96887	1.69096	2.02159	2.72555		6
PSMD4	5710	1.6539			1.66477			3.25546	1.9519	1.83353	1.59939		6
PSMD7	5713			1.50592	1.5825			1.62237	1.55264	1.95274	1.66898		6
PSME2	5721	2.21922			2.10507		1.52914	1.85135	1.61227		1.62384		6
PSME4	23198		1.63387	1.66926	1.58782				1.56355	2.18403	2.19132		6
PTDSS1	9791		1.85728	1.84611	2.35877			1.91628		2.87481	2.36077		6
PTGDS	5730	-2.14454	-2.49776	-2.42578	-2.64991				-2.92505	-5.54862			6
PTGS1	5742		-6.94711	-6.4488	1.51056		-3.70806			-1.64748	-2.65733		6
PYGL	5836	-2.50526			2.70784	3.69449	2.63067		1.64708	1.98555			6
RAPGEF3	10411	-3.38829				-3.63277	-2.8775	3.03964	-1.68051	-3.33376			6
RDH11	51109		1.5708	1.66357	1.58857	-2.023	-1.58117				1.63379		6
RENBP	5973				2.36781	-1.67549		2.78213		-2.17612	2.27963	2.21744	6
RPL12	6136		1.8989	1.91104		1.72803	1.56314	1.7968	1.55924				6
RPL28	6158	1.52495	1.59636	1.55686		1.88361	1.79232	2.49773					6
RPL35A	6165		1.55486	1.59145	1.58404	1.55642		2.20515		2.31199			6
RPL35	11224		1.70793	1.72268		1.88775	1.67073	2.02643		1.64528			6
RPL36	25873		1.67123	1.66545		2.07723	1.72141	2.18083		1.63995			6
RPLP0	6175			1.51806		1.91536	1.57833	2.382	1.66457	2.04438			6
RPS20	6224		1.67212	1.67273	1.53949	1.84593	1.76634	2.42895					6
RPS7	6201		1.81567	1.87662				2.28572	1.59707	2.08378	1.65367		6
RRM1	6240			1.53425	1.91047			2.66863	1.77179	3.06386	1.99486		6
SCO2	9997	1.81265			2.14826	1.6038	1.58293		1.51555	1.67883			6
SCP2	6342		-1.76769	-1.76765		-1.62597	-1.65216	-1.69218		-1.52024			6
SDHC	6391	1.51131				-1.89726	-1.58778	1.70756	1.5606	1.63457			6
SDHD	6392	-1.51507	-1.82709	-1.7983		-2.15686	-1.97614					-1.53303	6
SGPP2	130367		-1.6098	-1.60308		-1.77083			3.01017		1.65242	-2.32722	6
SLC25A10	1468	1.81926				-2.35656	-1.61151		4.85543	4.76533	1.89964		6
SLC25A17	10478		1.54151	1.568	1.97529		-1.53142			1.97512	2.00694		6
SLC2A3	6515	-1.8399	1.71141	1.81762		3.71314			-2.03384	-2.00049			6
SLC2A4	6517	-25.793	-6.18077	-5.69961	-16.0707			2.19911			-5.20255		6
SLC5A6	8884		3.72493	3.5685				2.19486	2.39882	3.63241	3.76283		6
SMPD3	55512	1.81942	-2.40663	-2.41235	-2.3514					-2.26166		-1.85132	6
SRD5A1	6715		1.94339	1.85215				-1.68584	4.25545	6.23812	1.61198		6
SREBF1	6720	2.13873			1.59976	1.66216				1.68939	2.08945	2.29972	6
ST3GAL2	6483		1.92069	1.97883	2.18406			1.84444		-1.73164	1.80288		6
STARD5	80765		-1.59119	-1.63125	1.90195	1.79297		-1.93151		3.22272			6
SUCLG2	8801		-2.16653	-2.21231	-1.68616	-2.63668	-1.78484			-1.68632			6
SULT1A1	6817		-5.0921	-5.29377				-1.52095	-2.33611	-3.8212	-2.35217		6
TDO2	6999	18.0105			3.59915			-2.4812	3.58641	1.71329	3.00262		6
TIMM17A	10440	2.15277			1.58762			2.03999	1.92087	1.59702	2.01514		6
TIMM17B	10245	2.19316	1.70648	1.67518				2.25177	1.94759	1.86861			6
TIMM9	26520		1.68955	1.76484	1.50675			2.0877	1.71703	1.63188			6
TKT	7086		2.2054	2.18197	1.51432		2.50514	4.46003	1.81923				6
TPK1	27010		-1.6084	-1.64444		1.70915	9.35613		-1.95641	-3.49704			6
TUBB2B	347733	-1.92812	-1.92089			-7.14942	-1.53322		21.5086	18.9934			6
TYRP1	7306				-13.888	-54.2173	-60.9142		-2.04308	-2.65843	4.4977		6
UCK2	7371	1.79808			1.89822			3.96811	3.8911	6.59313	2.65405		6
UCKL1	54963		2.19082	2.06757				2.28222	1.60001	1.60507	1.87891		6
UGGT2	55757		2.64962	2.73377	1.87498			2.26914	1.66116		2.21329		6
UGT1A9	54600		-5.76673	-6.16573		-1.79671	-5.96227		20.5395	100.543			6
UMPS	7372		1.70838	1.70721	2.02468				1.5047	2.67921	2.25818		6
WBSCR17	64409	-1.84115	-3.93853	-3.36389						-2.61789	-1.61208	-1.68703	6
WDR77	79084		2.74435	2.77743				2.02628	1.72396	2.12229	2.05681		6
YAP1	10413	-2.27579	1.62776	1.66369		-1.57228	-1.72714	1.67761					6
YWHAZ	7534	1.7712			1.61948			2.5136	1.89944	2.44997	1.93634		6
AACS	65985	-1.52965				-1.85393		3.45849	1.68789	1.90965			5
AADAT	51166		2.26252	2.45523		-1.66887	-1.51722	-4.68834					5
ABAT	18	2.28072				-8.6748	-3.66803	-2.02354			-1.66715		5
ABCC5	10057	2.07611			3.26742			3.70237	1.76062	12.6212			5
ACACA	31		1.79301	1.89591		-1.76739		2.94988			1.8351		5
ACADL	33	-12.528						-1.87067	-8.93988	-10.0018		-1.5129	5
ACER3	55331		-1.65608	-1.69384				1.71273	-1.56068		1.86845		5
ACLY	47		1.74879	1.77888	2.08154	2.4294		3.42266					5
ACO1	48	-4.25646				-2.31946	-2.57132			-1.53635		1.51673	5
ACO2	50		-1.99123	-2.00956		-1.50315	-1.54865	1.7378					5
ACOX1	51	-1.56406	-2.73268	-3.0329		-2.1126	-1.58633						5
ACSS2	55902	-3.4747	-1.92003	-2.0222		-1.82984				-1.96105			5
ACY1	95					-7.33585	-4.06285		1.89748		-1.86152	1.59023	5
ADCY2	108				-3.60427	7.13524	14.3025			5.6888	-2.10655		5
ADCY5	111	-2.50467	-6.80118	-6.6156			-2.5506				-3.28584		5
ADCY9	115		-2.48258	-2.53504				1.54877	-2.09579	-3.11703			5
ADH6	130		-2.57693	-2.42106		-6.78883	-7.13204	-1.90911					5
ADRA2A	150	-2.74162	-3.19388	-3.4335		-1.92608	-3.04574						5
AGPAT6	137964		1.58	1.5499				1.92201	1.52817		2.00448		5
AGXT	189		-1.79052	-1.71545		-5.33847	-42.2142	-1.64367					5
AKR1B10	57016		-8.06373	-7.74413				15.3677		296.473	-2.85545		5
ALDH18A1	5832	1.86154						2.18954	3.29866	2.56145	1.96353		5
ALDH3A1	218				-2.39372	1.8443	2.67477			11.5393	-4.6878		5
ALDH3B2	222		11.2552	10.7375					6.71313	24.3667	-3.22849		5
ALG11	440138	1.89336	2.25791	2.20343			1.61755				3.27461		5
ALG1	56052	1.82845			1.69286			1.99657	1.61787		1.74728		5
ALG6	29929	1.52288						2.28076	1.79505	1.97258	2.43445		5
AMACR	23600						4.15134	1.94898	1.83312	1.62702	2.17165		5
AMDHD2	51005	1.69393			1.57792	1.58958	1.51342	2.2014					5
AMN	81693		-5.31363	-5.70318				-1.61368	5.8083	3.17616			5
ANGPTL4	51129	-4.07273				29.4867			2.98341		-1.61211	2.4081	5
APOC3	345		-167.829	-570.683			-12.3224	-1.60169			-41.5935		5
ARSG	22901	1.72492		1.5064	-1.73313			2.07156				-1.55402	5
ARSI	340075	2.67325	1.91656	2.07546	4.28812							5.6461	5
ATP5G1	516	1.73749				-1.75388		2.4368	1.70315	2.37011			5
AUH	549	-1.53357	-1.57101	-1.64012		-2.46259	-1.85375						5
B3GALT6	126792		1.73666	1.72885	1.91969			1.87489			2.31321		5
B3GNT7	93010		-10.9216	-10.8308	-2.29574					-4.38218		5.55045	5
B4GALT4	8702				2.20795			1.84703	2.18921	4.74467	1.77971		5
BBOX1	8424	-4.71736					-1.87309	-2.27142		6.14947		-2.22457	5
BMP1	649				4.31753	3.38669	3.51285				3.42657	2.60955	5
BSG	682		-1.75951	-1.84522	1.78972			3.21671			1.60053		5
CA13	377677				-2.28377	-1.63213				-2.11512	1.76232	1.68798	5
CA5B	11238	-1.5523					-1.77143	4.52246	-1.75023	-1.7067			5
CACNB3	784	2.53731					3.31591	4.28382	2.4058		1.67825		5
CBS	875	3.6987			4.72133		2.3887		2.5905	2.71358			5
CCBL1	883		2.29096	2.34334	1.87847			2.07131		1.62127			5
CES2	8824	-1.59615	-3.63959	-3.90174	-1.6534						-2.40517		5
CETP	1071	-6.36075				2.16753		-4.68965	-2.9661	-5.01493			5
CHDH	55349		1.5351		-2.52789	-2.57395				-2.11684	3.37658		5
CHIT1	1118				12.5756	36.0424	125.423			-2.33742		2.78085	5
CHST14	113189				2.23138	1.71191	1.63166	1.83442			1.54704		5
CHST9	83539	-5.6078			-8.81333	2.19774	2.58069		-2.83495				5
CHSY1	22856		1.57902	1.63441	1.64579	1.51515					1.93075		5
CHSY3	337876		3.26276	3.59286	4.02021	4.34113					3.65211		5
CMPK2	129607	2.58926			4.48177	1.62874				-1.81725	1.67203		5
COASY	80347				1.54663			1.88906	1.93044	1.91339	1.74969		5
CPT1C	126129				2.0313	1.71859			2.30217		2.43345	3.37379	5
CPT2	1376		-2.35582	-2.40445		-1.70053	-1.758	-1.50912					5
CROT	54677		-2.06573	-2.24078		-2.69208				1.75389	-1.50335		5
CTH	1491				1.74359	-4.2265	-3.35952		2.57865			-3.36921	5
DAK	26007					-2.5601	-2.43079		1.60172	1.81806	-1.79352		5
DDOST	1650				1.79957			2.29083	1.79429	1.62869	1.74934		5
DEGS2	123099	5.90266			-2.79391	-9.52943	-2.30878					1.57991	5
DGUOK	1716				2.07638			1.69472	1.53799	2.01784	1.69353		5
DHODH	1723		1.77796	1.80966	1.54143			-2.3298			2.00647		5
DHRS9	10170		-8.61684	-8.42023	-3.00656	3.53271	9.53697						5
EBP	10682	2.02294	1.56793	1.60132		-1.52039					1.54575		5
EIF3H	8667	1.50008	1.78068	1.77346				2.4132			1.55258		5
ELOVL2	54898	3.26991				8.37225		2.00359		6.05566		1.62522	5
ELOVL4	6785				-1.76163				4.62143	12.7918	-3.40713	2.40873	5
ENTPD1	953				1.73995	1.79337		2.44461			1.52481	5.00676	5
EXOSC7	23016		2.1075	2.1393		-2.1703		1.75838			1.56869		5
EXOSC8	11340		2.35359	2.40064	1.57044			2.05791			2.2389		5
EXOSC9	5393		1.59413	1.68996	1.74037			2.20169			1.95808		5
F10	2159	-7.5711			-4.67554				-2.75318	-7.17382		-6.01365	5
FBXL3	26224	-1.55383					-2.06956		-1.64062	-1.70325		-1.80674	5
FECH	2235		-1.83378	-1.73683		-4.3382	-3.7389			1.5426			5
FKBP9	11328		1.6613	1.65834	2.93148			2.41527			2.44298		5
FMO3	2328		2.65441	2.43481			-3.04259		-2.08497		1.77714		5
FXN	2395		1.64831	1.64749		-1.8113		-1.52953			1.6826		5
G0S2	50486	-16.9782					-2.4872	-1.88152		-2.18148		5.02109	5
G6PC3	92579	1.60764	1.68226	1.66704				2.67717			1.82144		5
GALC	2581						-1.72778		-1.66546	-2.25792	1.81313	-1.61452	5
GALE	2582	2.9072					1.76025	1.71203	2.25155			8.63997	5
GALM	130589		-1.55855	-1.57635		-2.44891	-2.24556			-1.6783			5
GALNT3	2591					-7.04644	-2.82359		1.98764	2.11429	2.18155		5
GBA2	57704		-1.64715	-1.6832		-1.55463	-1.52704	2.30409					5
GGT5	2687				2.41726		-3.8145	-1.64618	1.72367		2.31103		5
GLDC	2731	8.85097				-5.66417			12.0142	6.52907		-3.28888	5
GNB5	10681				2.53379	-2.13168	-1.57093	2.55135		1.63291			5
GNS	2799				1.56553	-1.50466		2.06399		-1.67995	2.08669		5
GPAA1	8733	1.6243			1.54814			4.09016	1.60521		1.63043		5
GPC1	2817		1.70041	1.80163	2.35795		1.65688			8.9245			5
GPC4	2239	2.12664	1.65816	1.6714		-2.04323	1.60151						5
GPC6	10082		-1.66728	-1.51355	2.0154	1.57138			1.98061				5
GPX1	2876			1.5104		1.5777	2.96283	1.8175				1.96083	5
GRP	2922		5.22406	5.7973	4.23444						-3.20981	-2.10868	5
GSR	2936	1.6817				-1.90631		1.58186	1.99842	2.6012			5
GSTA1	2938		-17.0748	-18.4959			-16.6338			4.87302	-4.03718		5
GSTA2	2939			-38.417	-11.5617		-36.0487			-3.60926	-4.70152		5
GSTP1	2950		1.97578	1.94427	1.80369	-1.58682				1.93276			5
GXYLT2	727936				2.04341	3.54559	1.94032		1.53753		2.09655		5
HAS2	3037	-1.85557			2.85058	-2.40617			-1.84837	-1.96616			5
HIF1A	3091				2.35893	-2.58114			1.6573	1.81587	1.9682		5
HS2ST1	9653		1.6709	1.69507	1.54653			1.63606			2.48174		5
HSPA8	3312		1.50813			-1.71631	-1.69667	1.50135			1.59411		5
HSPG2	3339	-1.76344			2.24436	1.95261	-2.21515	2.7525					5
IDH1	3417					-1.69396	-1.74374		1.85052	1.75909	1.64631		5
IDI1	3422					-2.17728	-2.78419	1.91122	-1.67581			-1.69359	5
IMPA1	3612		-1.83679	-1.83787				1.81398			1.86268	-1.60667	5
IMPA2	3613		-2.00137	-1.98306					1.77247	1.8841		-2.24421	5
IMPDH2	3615		1.82445	1.81435				2.80735	1.61992		1.54032		5
INPP5E	56623		1.62743	1.57685	1.79913			2.5373			1.68185		5
INPP5K	51763	-1.62491	-1.57016	-1.5797					-2.03833	-2.23992			5
ITPKB	3707		-1.751	-1.53849		-2.04651	-3.76				-2.17987		5
ITPR2	3709	-1.57959			-1.54359	-2.69444	-2.66789			-1.82446			5
LSM1	27257	1.99445			1.78081			1.57101	1.5527	2.34225			5
LYPLA2	11313	1.77861						1.60241	1.96609		1.62003	1.79581	5
MAN1B1	11253				2.19384	1.51373		2.05235		1.50868	1.8058		5
MAPK11	5600	-1.52371			2.03611	2.12172		4.24718			1.55211		5
MARS2	92935		1.65175	1.64307					1.96967	2.35301	2.5823		5
MCCC1	56922	-1.76626				-2.31708	-1.59783			1.88612	1.54723		5
MCCC2	64087	1.68679				-2.00072	-1.6184		1.6748		2.29641		5
MED10	84246				2.40087	1.57369		2.04312	1.55438	2.52175			5
MED1	5469		1.60127	1.54279	1.6532			1.82246			2.22206		5
MRI1	84245		1.65357	1.62875	1.57463			1.68244		1.68625			5
MTM1	4534		-2.29354	-2.29832			-1.54634		-1.62416	-1.73828			5
MTMR1	8776		1.50119	1.52724				1.96845		2.13506	1.59002		5
MUT	4594		-1.52971	-1.53138		-2.29074	-1.93208	-1.66224					5
NADSYN1	55191				1.62833	1.80145	1.65741	1.98558		1.68571			5
NANS	54187	2.14154	-1.699	-1.67056				1.9318			1.50127		5
NCOA1	8648	-1.54928	-1.59162	-1.56622		-1.61591	-1.90824						5
NEU3	10825		1.76484	1.76707				1.88799			2.20592	-1.59753	5
NFYA	4800				1.78175			2.83595	1.72008	1.51919	2.20527		5
NPL	80896				2.19738		-1.52814	1.9578		1.79822	2.51106		5
NPR2	4882	-3.22361	-1.65293	-1.54412				2.35752	-1.82278				5
NT5M	56953	1.74213					1.59303	4.2021	1.92053	2.82772			5
NUP188	23511		1.8546	1.92014	1.62073			2.29753			2.32455		5
OGDHL	55753					-4.33451		-1.8833	18.5224	20.8633		-2.59355	5
OPLAH	26873					-1.60237		1.9163	2.77782	2.7863	2.21096		5
OXCT1	5019	-1.95454				-2.88025	-1.79853			2.2069		-1.50192	5
P4HA2	8974	1.56278			3.49239	2.48086		4.48485				3.63341	5
PAFAH2	5051		-2.03159	-2.04065		-2.26763	-1.51076			-1.55823			5
PANK3	79646		-1.89311	-1.88555		-1.83116	-2.05723			1.6911			5
PARN	5073	1.58132			1.99605		1.63109	1.65044			1.84913		5
PDE3A	5139	-2.21669	-3.79043	-3.58516						-1.92594	-1.81306		5
PDE4B	5142				-1.88113		-1.99621		-1.80466	-1.91901		-1.80101	5
PDE6G	5148	1.79218	-2.40842	-2.35293		-2.57235				-1.74522			5
PDE8A	5151	-1.60831	-2.05851	-2.17382	1.6517						1.65294		5
PDK1	5163				2.29654	3.31412		2.21243	3.41272	4.72648			5
PDXK	8566					-2.41939	-1.90644	2.57368		-1.54486	2.01616		5
PGP	283871	2.3338			1.69486			3.32039	1.56281		1.74082		5
PHPT1	29085	1.66878				1.52234	1.55854	3.4693	1.55723				5
PIGC	5279				1.50853			3.38929	1.619	1.59269	1.71559		5
PIGS	94005		-1.59191	-1.58702	1.54742	-1.54776		2.32719					5
PIGT	51604	1.68653			1.7616			2.57022	1.6782		1.95019		5
PIGX	54965	1.68304			2.28093			2.15307		4.25072	1.60023		5
PIK3R3	8503	1.59345					-1.61278	2.48532	-1.63187	-1.59098			5
PLA2G4A	5321	-3.08244				-3.62348	-2.55321		5.74309		2.03415		5
PLA2G6	8398					2.04461	1.52346	4.04938	1.58923	1.97937			5
PLA2G7	7941				4.94299	13.0378	17.8952				6.77775	-2.56386	5
PLCB2	5330				1.77319	4.30513	3.248			-2.88744	2.11743		5
PLCB4	5332		3.03915	2.79558	-3.06565	1.88401			-1.60556				5
PLCD1	5333		-4.76577	-5.16572		-1.92466					-1.81329	1.70798	5
PLCG1	5335		2.28189	2.21245	2.20093			3.33341			1.80964		5
PLCG2	5336	-1.75306	-3.23296	-3.25105	1.91496					-1.65986			5
PLD3	23646				1.91641		1.51484	1.55244			1.56451	2.20418	5
PLD4	122618		-2.58772	-2.55854		4.98045	2.96495			-1.92353			5
PLIN2	123	-2.02489			-1.60123	7.38175		-2.00859		-2.22076			5
PMM1	5372		-1.63253	-1.70532			-1.62014			-1.62766	-1.69659		5
PNPO	55163		1.70564	1.69887		-1.7358			1.549		2.12236		5
POLR1B	84172		2.4831	2.46096					1.69367	1.91917	2.98855		5
POLR2J	5439	1.52873					1.91007	1.91271	1.78242	1.94213			5
POLR3A	11128		1.62435	1.6256				2.02904	1.58595		2.25097		5
POLR3F	10621		1.69322	1.71228	1.60438			2.30371			1.89167		5
PPP2CB	5516		-1.61917	-1.58305		-1.51163			-1.6674	-1.74071			5
PREB	10113		1.69191	1.66489				2.37465	1.76561	1.94844			5
PRKAR2A	5576				-1.52336	-2.29248	-1.98968	1.52649				-1.56974	5
PRKCD	5580		-1.56178	-1.68822			-1.59386	2.7439		-1.9643			5
PRODH	5625	1.93942			1.82199	1.90021	-1.97848			-1.92116			5
PRPS1	5631		1.99704	2.10207	2.0226						1.86137	-1.87826	5
PSMA2	5683		1.61146	1.62392	1.79488					1.76175	1.73336		5
PSMA3	5684		1.55105	1.56138	1.82193			1.5399			1.9041		5
PSMA4	5685	1.54707			1.95016			1.83516		1.83587	1.99367		5
PSMA6	5687	1.58162			2.11146			1.88563	1.7519		1.67941		5
PSMB10	5699	1.57847			1.80696	2.59142	2.50026	1.58927					5
PSMB7	5695		1.50585		2.01243			1.58509		1.64554	1.66421		5
PSMC6	5706				1.59521			1.67227	1.56967	1.68398	1.78545		5
PSMD2	5708				2.59206			2.24583	1.58707	3.55526	1.81372		5
PTGES2	80142	1.5641						2.33162	1.91381	2.06611	1.95169		5
PYGM	5837	-114.149	-14.2868	-12.3533	-45.0577						-6.74747		5
QDPR	5860					-2.08203	-2.34177		-1.65163	-1.65203		-1.61222	5
RDH12	145226				-1.56592	-4.7038	-9.04314				-7.35625	-2.95727	5
RDH16	8608	8.58578			4.62059			-2.83447		10.2564	4.34622		5
RPIA	22934		2.05394	1.95012				2.52923		1.67559	2.47714		5
RPL18	6141		1.58731	1.59586		1.96659		2.08392		1.50575			5
RPL7	6129		1.94362	1.96609				2.23529		1.57761	2.01072		5
RPN1	6184	1.55237			2.16415			1.54485		1.62423	1.81182		5
RPS28	6234					1.89074	1.76361	1.84869		1.66732	1.8972		5
RQCD1	9125			1.50673	1.61656			2.10064		1.7832	1.83528		5
SAT2	112483	-1.57284				-2.54268	-2.33309			-1.52154	-1.64997		5
SDC3	9672	-1.59728			1.54203	1.91518	1.72699					2.38654	5
SEC61A1	29927				1.81497			2.1161	1.71823	1.72106	1.79		5
SGPL1	8879	1.56286						1.59748	2.12693	2.2414	2.2459		5
SLC19A3	80704	-32.1639						-1.8831	-7.31831	-11.2433	4.22359		5
SLC25A12	8604				-1.55746	-1.71006		3.03067		1.64798	-1.50372		5
SLC27A1	376497	-1.74473	1.57655	1.59078				1.53618		-1.62521			5
SLC27A5	10998		2.7172	2.86381				-2.08766		1.89397	1.80328		5
SLC44A2	57153					-1.75754	-1.58682	1.82004	-1.84725	-2.12074			5
SLC44A3	126969				-2.27276	-1.70758		3.42666		-2.02342	1.79701		5
SLC46A1	113235		-1.9921	-2.13126				2.47209			-2.45488	-1.5812	5
SLC5A1	6523	-2.36126			-2.03295	4.38131				-1.95245	-3.76491		5
SLC9A1	6548		-2.32885	-2.36764	1.62384	-1.61441		2.2832					5
SMG5	23381	1.55308			1.74758			4.07217	1.81389		1.99837		5
SMN2	6607		1.67253	1.68502				1.72639		1.50383	1.64059		5
SNAP25	6616		-4.07483	-3.52027		3.73838	6.9521					3.00106	5
SRP9	6726	1.95666						2.04705	1.6609	1.66486	1.83195		5
SSR1	6745				1.58953			2.17824	1.5394	1.53126	1.84279		5
SSR2	6746	1.5921			1.53914	1.54545		3.57191	1.53571				5
SSR3	6747				1.83673			2.1301	1.53191	1.51753	1.73568		5
ST3GAL1	6482	1.746	1.97416	1.96315			-2.68693				1.88468		5
ST3GAL3	6487	-1.99916	-1.98468	-1.84922				1.69432			-1.87106		5
SUCLG1	8802	-1.56894	-1.6221	-1.61413		-3.67214	-1.98161						5
SULT1A3	6818			-1.5361	2.0005	2.16162	1.85886	2.59723					5
SYNJ2	8871						-1.75388	2.31787	3.17567	2.26545	1.89988		5
TBCD	6904	1.52201	1.68881	1.75126				1.96508			1.81183		5
TNFSF13	8741		-1.52328		-1.62531		1.73648		-2.14597	-4.52049			5
TOMM20	9804		1.66523	1.71507				2.53292		1.62051	1.83428		5
TPMT	7172	1.62157			1.68351	-1.72312			1.57758		1.57936		5
TREH	11181		-6.869	-8.16433		-6.48768	-6.0021				-16.5795		5
TXNRD1	7296				2.66709			4.20936	3.18013	2.77591	1.88532		5
TXN	7295	1.88843					1.56703	2.54175	1.90924	3.2381			5
UGGT1	56886				1.78981			2.48035	1.67145	1.51094	2.17022		5
UGT1A1	54658		-6.70251	-6.65281				-1.59418		39.1922	-5.90642		5
UGT2A3	79799		-8.42445	-8.30365		1.63747	1.86448				-2.17765		5
UXS1	80146				2.01077	-2.9682	-1.76182	3.10083			1.65779		5
VBP1	7411			1.5117	1.56408			2.35661		1.77364	1.75534		5
WWTR1	25937	-1.57307	-1.99239	-1.64737					-1.6994			-1.65249	5
XRN2	22803		1.81526	1.74548	1.67325			1.63931			2.41139		5
AAAS	8086				1.56984			2.02571		1.62444	1.6328		4
ABCD1	215				2.60738	1.89643		3.16794			1.69982		4
ACAD8	27034				-1.66707	-2.38926	-1.77696		2.52341				4
ACAT2	39	1.5116				-1.6465	-1.69499			1.65044			4
ACSL3	2181					-2.15041	-1.87815	1.70343			1.52301		4
ACSL5	51703	-1.93495							1.77134	-3.81072		1.8096	4
ACSM1	116285	-3.54672					6.42776	3.70991				1.83475	4
ACSM5	54988	-15.9107				1.85345		-2.47325				-2.19689	4
ACSS3	79611	-2.57178				-1.64835			-2.95661	-4.5415			4
ACY3	91703				2.41381		-2.46297		10.1554		-4.10776		4
ADAL	161823					-2.26028	-1.52947	1.54968				-1.58602	4
ADO	84890		1.50611	1.51402	1.54046						1.93172		4
AGPAT5	55326							1.65021	1.56	1.91444	2.88162		4
ALDH7A1	501	-1.55682				-1.76649	-2.22251					-1.64415	4
ANPEP	290		-12.8505	-12.4429						-3.44066	-4.09086		4
APOE	348				1.94977			1.58404			5.44243	4.63728	4
ARG2	384					-3.62474	-7.47506		1.75602	1.82038			4
ARNTL	406		-1.65055	-1.74313	2.03322							3.08935	4
ARSJ	79642		1.51947	1.98262	3.57727							2.17084	4
ASPA	443	-12.8729					-2.71906	-2.47147			-4.04617		4
ATP5A1	498		-1.88812	-1.79652		-2.63954	-1.70855						4
ATP5B	506		-1.55989	-1.53884		-2.17298				1.73324			4
B3GAT1	27087	-2.70341							5.8366		-2.23973	3.89655	4
B3GNT6	192134		-3.24382	-3.21074	-5.72077				62.5124				4
B4GALT2	8704				1.91914			1.9421	2.52715	2.72741			4
BCKDHB	594	-1.5656			-1.6457	-2.65226		-1.8455					4
CA3	761	-43.9759			-26.0729				-4.45257	-10.1775			4
CALM1	801		-1.71918	-1.66209			-1.68017		-1.59863				4
CANT1	124583	2.27412						2.59699	2.0314		1.82188		4
CEL	1056		53.4088	44.9734		-8.31905	-8.16025						4
CERK	64781		-1.54496	-1.6173			-1.95253	2.09869					4
CHRM3	1131			1.6215	1.88255					3.65062		1.95665	4
CHST6	4166	4.24294			-2.27678				2.28362	1.76838			4
CNOT3	4849				1.80636			2.47189		1.73624	1.74674		4
CPT1A	1374		-2.31983	-2.45445		-1.83208	-2.81506						4
CRAT	1384	1.81997	-1.84854	-2.01568	-3.69941								4
CSGALNACT2	55454			1.55612	2.68349	1.59978					2.03238		4
CYC1	1537	1.73779						2.39032	2.05518	2.73181			4
D2HGDH	728294							1.55952	1.92108	1.81357	1.71267		4
DCK	1633	1.52653			1.77522			2.63783			2.05458		4
DDO	8528				-2.64119				-2.29766	-4.27443	-1.57454		4
DEGS1	8560				1.66893	2.17217	1.54446	2.32811					4
DGKD	8527					4.11651	1.76046	2.63617		-1.63062			4
DGKG	1608				3.51451					1.74089	-3.6186	-1.84147	4
DGKH	160851		1.81203	1.86881	1.70188					1.78661			4
DHCR24	1718	1.76319				-1.74562			-1.88604	-2.1364			4
DIO1	1733	12.5206				-29.8335	-11.454					-2.77193	4
DOHH	83475	1.73319			1.59015			2.12268			1.82817		4
DPAGT1	1798		1.50635					1.89456	1.70622		1.95783		4
DPYD	1806	-2.4396	-2.92757	-2.79416						-2.71643			4
DUT	1854				1.94873			2.72806		1.76775	1.5469		4
ECHS1	1892					-2.72808	-2.30302	-1.56748	1.51363				4
EDC3	80153				1.55742			2.67887		1.57488	1.5639		4
EIF1AX	1964		1.84717	1.89649			-1.50954				1.8509		4
EIF2B5	8893				1.58378			1.80018		2.68204	1.7599		4
EIF3D	8664		1.5244	1.52444				2.23742		1.64251			4
EIF3E	3646		1.9511	2.03401				2.40597			1.55728		4
EIF3J	8669		1.65762	1.67277						1.67712	1.86075		4
EIF5B	9669		1.8928	1.92602				1.62939			1.87173		4
ELAVL1	1994				1.62086			1.89768		1.52058	1.77657		4
ENPP3	5169					23.6895		2.42232	6.11131		-16.6761		4
ENTPD3	956		-3.87245	-3.43172						2.48884	-2.19902		4
EPHX1	2052		-1.72399	-1.7596				1.9493			-1.63191		4
ETNK1	55500		-1.87534	-2.17346		-1.63956					2.09772		4
EXT1	2131				3.38594			1.57282		1.688	1.75569		4
FADS1	3992		3.02081	2.96038	2.57925						1.9605		4
FASN	2194		2.51439	2.63088				3.1581			2.42622		4
FBXO4	26272				1.57827			1.82097		1.73744	1.76853		4
FDFT1	2222					-2.24131	-1.60473	1.72506			1.63993		4
FHIT	2272					-1.75842		3.7408		-1.6996		-1.52457	4
FPGS	2356		1.88373	1.88726	1.93406						2.00039		4
FPGT	8790						-1.61289	1.69638			1.68215	-1.63406	4
GAA	2548	1.50002			2.09481		1.58582	1.7177					4
GALK1	2584	1.71528	2.13151	2.18				1.66671					4
GALNT2	2590				2.7447	1.58787			1.83334	2.08744			4
GANC	2595	-1.51861						1.72743	-1.65339	-2.22907			4
GBA3	57733		-28.9224	-29.2638				-3.30632			-11.266		4
GCDH	2639					-2.28937	-2.04939	-1.7015		1.51476			4
GEMIN5	25929		1.94061	1.97838				1.84615			1.83339		4
GFER	2671	2.02953			1.71086			1.89464	1.56639				4
GLB1	2720				1.5432	-2.09909		1.88642			1.7922		4
GLIPR1	11010				2.38204	2.57718	1.73567					-1.99062	4
GLYCTK	132158	-2.67861				-2.25514	-1.93944			-1.54253			4
GM2A	2760				1.63385	2.24237	2.42669	2.18684					4
GMPPA	29926	1.68357			1.56055			2.05398	2.15085				4
GNAQ	2776		-1.66262	-1.63601					-2.23399	-2.83499			4
GNG12	55970	-1.79524	-1.93476	-2.05463		-1.53601							4
GOT2	2806	1.53538				-2.3191			1.56484	2.263			4
GPAM	57678	-21.9346				-1.78681		1.57589			1.66654		4
GPC5	2262					-70.4734	-48.7538	5.63616	-2.50449				4
GPCPD1	56261	-1.62646	2.53322	2.64582						-1.51535			4
GPX7	2882				2.50898			3.01037	1.63899	2.32987			4
GSTT1	2952		-1.54206	-1.5046		-1.53779				-2.50225			4
GSTT2	2953	-2.40043	1.58959	1.65139			-2.35012						4
HADHB	3032		-1.80713	-1.81573		-1.75685	-1.52145						4
HAGH	3029	1.57487				-1.79343	-1.52947			-1.5178			4
HAS3	3038	-7.70948			2.51729					3.98538		-1.76479	4
HEXB	3074				1.73779			2.05248		-1.65946	2.01531		4
HK1	3098						-1.54259	2.12915		1.51745		-1.81428	4
HMGCL	3155		-1.78115	-1.80838		-1.94554		-1.66408					4
HMGCR	3156					-2.26561	-2.11627		-1.61602			-1.80685	4
HMGCS1	3157					-1.65953		1.65824	-1.90482			-1.7376	4
HNMT	3176	-2.00245			-1.73927		-2.02581			-2.89944			4
HS6ST1	9394					-4.91073	-4.7917	2.06824		2.69032			4
HSD17B1	3292				2.56374	-1.81912			3.0554	7.17107			4
HSD17B3	3293					13.9715		4.39054		12.6239		-4.16304	4
HSD17B4	3295					-1.85146	-1.70028		-1.84517	-2.43158			4
HSPA9	3313							1.52834	1.54721	1.51432	2.18783		4
IDI2	91734		1.58557	1.61173				2.07916			2.04819		4
ITPK1	3705				1.92953			1.97608	-1.50469	-1.6122			4
IVD	3712					-2.11893	-1.85915	-1.57069				-1.54406	4
JMJD7-PLA2G4B	8681		1.65885	1.66615				1.97558		1.72347			4
KIF13A	63971	-1.79916			1.50743		-1.72518	1.69926					4
LAP3	51056				1.84198		-1.95054			-1.66388	1.991		4
LGMN	5641				1.59898					-1.61751	1.54138	-1.74059	4
LPCAT3	10162		-1.8958	-2.00866			1.6644		-1.77661				4
LPIN2	9663					-2.24363	-1.93271			-2.61781	1.86538		4
LRAT	9227				7.08155	4.52933			3.62872	4.50602			4
MAN2A1	4124				1.6113		-1.60575		1.51053			-1.67489	4
MED15	51586				2.28484	1.62463		2.25046			1.65094		4
MED19	219541				1.65244			1.94279		1.59891	1.65774		4
MED27	9442				2.04382			2.41532		1.52904	1.703		4
MED6	10001				1.66143			1.73866		1.52439	1.60878		4
METTL6	131965		1.60393	1.61333				2.83393			1.57574		4
MGAM	8972		-40.4224	-49.012			-4.79627				-8.63736		4
MGST1	4257	-2.31527			-1.59471		1.68644		2.05969				4
MIOX	55586					-5.51808	-4.908		36.3525			-2.66613	4
MLEC	9761				1.55536			2.57879	1.56929		2.77005		4
MPI	4351		-1.78587	-1.82249		1.71976		1.52296					4
MTAP	4507		2.14953	2.19234	1.88308						2.00108		4
MTMR4	9110								1.70353	1.82153	1.6606	-1.89589	4
MTOR	2475					-2.50965	-1.74507	1.81843			1.61822		4
MUC21	394263				-27.3381				16.113		-28.204	74.7973	4
NAT2	10		-3.00574	-3.12869				-5.30122			-2.49778		4
NEU4	129807		-5.72035	-6.44708			-3.75214				-2.5376		4
NME3	4832	2.58949				1.79937	1.79127	2.43306					4
NME5	8382					-1.74202			-1.89451	-6.02434	-2.69173		4
NMNAT1	64802		-1.71218	-1.75886		-1.90722		1.50153					4
NSDHL	50814		2.06822	2.08141				1.9521		1.80831			4
NT5C	30833				1.67822		1.8456	2.30249		1.82239			4
NT5E	4907	-2.41316			4.03056				4.05722			2.57796	4
NUDT12	83594		-1.67408	-1.67159		-1.74719	-1.96461						4
NUP153	9972				1.54345			1.66321			1.98291	-1.60648	4
NUP50	10762				1.61732					1.83561	2.0085	-1.65234	4
NUPL1	9818		2.28576	2.2923	1.52415						2.57879		4
OTC	5009		-2.19779	-2.48758				-1.51629			-4.31392		4
PAH	5053		109.524	122.466		-7.87295	-8.66926						4
PAPSS1	9061					-1.85458		2.47007	-1.78902			1.54249	4
PATL1	219988		1.59645	1.58116	1.79617						2.19076		4
PCBD1	5092		1.67475	1.71281		-1.51508					1.53795		4
PCCA	5095	-2.28665			-1.63472	-2.94275	-1.8628						4
PDE10A	10846		2.81191	3.4473			-2.86547					-2.33802	4
PDE3B	5140	-14.6008							-1.91555	-2.19151	2.26987		4
PDE4D	5144		-2.49725	-2.13906						-2.84326		-1.98227	4
PDP2	57546	-2.74091				-3.6154	-2.77336				1.69345		4
PEMT	10400	-2.0899	1.59537	1.63268				-1.67827					4
PEX11A	8800		-2.11873	-2.27328			-1.54399					-1.79605	4
PFKM	5213			1.57939	-3.09057	-2.18561		2.82325					4
PGS1	9489				1.86251		1.51663	2.75376			1.78799		4
PI4K2A	55361				1.68084	-1.67813		1.71367				1.81196	4
PIGA	5277		1.51646					1.66301		-1.93244	2.00089		4
PIGM	93183	1.64692						2.17812	1.83243		2.13865		4
PIK3C2G	5288	-7.7341				-44.7489	-26.1945	-1.53954					4
PIK3CA	5290	-1.62887			2.09564					1.9619	1.56801		4
PIK3CD	5293		-1.82402	-1.75385	2.9679	1.72074							4
PIK3R1	5295	-2.88478			-1.86308				-2.06267	-1.6533			4
PITPNB	23760		1.55187	1.60071	1.69315					1.75131			4
PLA2G12B	84647						-5.7144			-4.96541	-3.58861	61.8624	4
PLA2G15	23659				1.54445			1.60698		-1.80205	2.36662		4
PLA2G2A	5320	-3.01189	-2.2482	-2.21433	-4.24873								4
PLA2G3	50487	3.81793	24.3486	26.2515					-2.35473				4
PLCB3	5331	1.51441			1.75857			2.52967		1.58299			4
PLD1	5337	-2.34843	-2.09547	-2.22006						3.83287			4
PLIN1	5346	-37.8328			-39.5915		-10.9265	-1.91329					4
PNP	4860	1.96594				-2.92425	-2.31212					3.9434	4
POLD3	10714				1.72876		-1.77476	2.57559			3.00877		4
POLD4	57804	1.88242	-1.84774	-1.89252				1.53808					4
POLR1D	51082		2.41996	2.37974		1.57424		1.78414					4
POLR1E	64425	-1.52414	1.97396	2.01835		1.56799							4
POLR2G	5436				1.9581			2.33696		1.74915	1.61036		4
POLR3C	10623		1.53758	1.53097				2.46466			1.70565		4
POMC	5443					-1.51412	-1.89405			6.74477		-1.74775	4
PRKACB	5567		-3.34764	-3.34265		-1.59131						-1.50562	4
PRKCSH	5589				1.86531			1.91		1.62535	1.81179		4
PSMB1	5689				1.91084			1.50158		1.64608	1.61159		4
PSMD10	5716				1.73726			2.62486		1.96532	1.55716		4
PTGS2	5743	-3.05873			3.96599	-2.53529	-5.52341						4
PYGB	5834						1.78423	4.29927	1.69738		1.57412		4
RANBP2	5903			1.5373		-1.81837	-2.11737				1.67678		4
RAP1A	5906		-2.02327	-1.89952						-1.74874	-1.58232		4
RETSAT	54884	-3.42852	-3.4354	-3.54181								-1.55106	4
RFT1	91869		1.68394	1.66969				2.00109			1.88534		4
RORA	6095	-1.79006			-1.66251				-2.32773		-1.65795		4
RPL10	6134		1.52779	1.53621		1.918		2.00658					4
RPL14	9045		1.74068	1.71208			1.65581	2.186					4
RPL19	6143		1.56153	1.53279			1.68253	2.04461					4
RPL23A	6147					1.57107	1.63534	2.31672	1.50224				4
RPL23	9349		1.68311	1.71405			1.88913	2.39249					4
RPL27A	6157			1.52088		1.71405	1.57146	2.01151					4
RPL29	6159		1.53154	1.53421			1.61972	1.8091					4
RPL31	6160		1.65788	1.69592		1.50842		1.88083					4
RPL37A	6168		1.53478	1.52827		1.50399		2.16225					4
RPS15	6209		1.59866	1.59134		1.82569		2.07815					4
RPS16	6217					1.51158		2.31091	1.57677	1.61356			4
RPS24	6229		1.61759	1.6519		1.5228		2.11389					4
RPS3	6188		1.51975	1.53794		1.59728		2.24253					4
RPS5	6193			1.55095		1.76212		2.58192		1.69298			4
RXRA	6256		-1.83771	-1.92694			-2.58036		-1.55307				4
SACM1L	22908					-2.08986	-1.56444		-1.6667	-1.95866			4
SARDH	1757	1.79767				-2.5595	-3.22632	-1.88376					4
SDHA	6389		-1.71936	-1.71465					1.65252	1.7114			4
SEC23A	10484		-1.55271	-1.56592	1.91505				1.54951				4
SEC24D	9871	1.73573			1.81601	1.68202			1.92439				4
SEH1L	81929			1.53489	1.55014					1.70375	2.54878		4
SGMS2	166929							-2.07283	-2.45863	-6.99676	1.50931		4
SHMT1	6470	-2.18353			-1.63717	-2.14137		-1.64337					4
SLC25A13	10165				1.66994				2.22513	2.3121	2.49157		4
SLC25A32	81034		2.2725	2.34528	2.1474						2.4357		4
SLC25A5	292					-2.40592	-1.90714	1.75408		1.93153			4
SLC44A5	204962				1.9629			9.81632	5.94742	14.3648			4
SMPD1	6609		-3.19671	-3.19843		-2.03952				-1.86465			4
SNRPD3	6634				1.77557			1.95114		1.87685	1.69096		4
SPCS2	9789	1.6798			1.50504			1.85262			1.97931		4
SQRDL	58472		-2.9126	-2.9256		2.05657	1.84302						4
SREBF2	6721					-2.60758	-2.6778	2.42273	-1.5241				4
STARD4	134429				3.21619		-1.6724		-1.86028			-1.69493	4
TALDO1	6888						1.7751	2.17281	1.7746	2.16535			4
TBCB	1155	1.94995			1.76021			2.45941		1.5687			4
TBL1XR1	79718				2.46085			1.74696		3.23085	2.47538		4
TBL1X	6907						-1.70501		1.94354	2.49115		-1.89726	4
TCP1	6950				1.54139			1.87742		2.13621	2.13848		4
TIMM13	26517	1.6961						2.19763		1.68083	1.55019		4
TOMM70A	9868						1.80989		1.5613	2.04378	1.62276		4
TPR	7175		1.53725	1.55057				2.58256			2.00941		4
TRAM1	23471				1.51706			1.94592		-1.59764	2.26383		4
TRDMT1	1787	-1.58808					-1.52792			-1.58544		-1.51077	4
TRMT11	60487		2.13257	2.17791	1.59964						1.99599		4
TST	7263		-2.7958	-2.9539		-2.31344	-1.68314						4
UAP1	6675		-1.62472	-1.60748			-2.36755		1.70426				4
UGP2	7360	-2.49399	-3.76679	-3.86436	-1.64357								4
UGT1A6	54578		2.66779	2.37604					24.5734	68.3929			4
UGT2B7	7364					-3.20937	-4.35116	-2.47629			-2.98473		4
UPF3A	65110		2.01235	1.94438				2.2339			1.66461		4
USP11	8237				1.60633	-1.76039	-1.57587	1.98378					4
VDAC1	7416							1.84104	1.69892	1.74549	1.72616		4
AASDHPPT	60496		1.73024	1.76411							1.91561		3
AASS	10157	-3.5267				-1.92645						-1.99789	3
ABCB4	5244					3.69744	2.99305		5.90816				3
ACADVL	37	-1.71464	-1.61407	-1.61247									3
ACER2	340485	-1.7373									-1.86946	2.21009	3
ACSL6	23305		33.311	32.6265				4.82716					3
ADH1A	124	-35.996						-2.42585	-7.93885				3
ADH7	131				-2.41445					52.4849	-21.6888		3
ADSL	158							2.27239		2.10004	1.62362		3
AGPAT2	10555	-3.41607								-1.68042		1.56884	3
AGPS	8540				1.67959		1.5161				2.11531		3
AGXT2	64902					-2.46225	-4.84774	-2.45234					3
AK2	204				1.62728				1.64326		1.59265		3
AK3	50808	-1.95153				-2.91079	-2.43416						3
ALAS1	211					-2.2189		-1.5664		-1.77722			3
ALDH1A2	8854	-8.0047				-3.77656				-8.11199			3
ALDH3A2	224	-1.63033				-1.72982	-1.62256						3
ALDH5A1	7915					-2.23546	-1.78878				2.2402		3
ALDH9A1	223				-1.81267	-1.79889	-2.11798						3
ALG5	29880		1.60465	1.63468							1.85561		3
ALOX12	239				-3.59647					13.7071	-18.3341		3
AMD1	262						-1.92945				1.53524	-1.77834	3
AMDHD1	144193					-1.57202	-2.34555	-1.81779					3
AMPD1	270	-18.2875			-14.6312						-6.07758		3
AMPD3	272							2.31751	1.762		1.63478		3
AMY1A	276				-633.885					-3.36643		2.05168	3
ANKRD1	27063				-2.79679				-20.5432	-48.3292			3
ANP32A	8125				1.69423			1.85793			1.69186		3
APOB	338		-132.774	-214.03							-19.9572		3
ARF1	375	1.95417						2.09409			1.54984		3
ARFGEF2	10564					-1.80852		1.8092			2.19355		3
ARSA	410		-1.89226	-1.92076				1.68659					3
ARSB	411				2.07327			1.75585		-1.51814			3
ARSK	153642				1.68981			1.71965				-1.7151	3
B3GNT2	10678						-1.91347		-1.75375		1.59484		3
B4GALT5	9334						2.629				1.92468	1.67023	3
BCAT1	586				4.4163	2.38741						2.71058	3
BCAT2	587	1.71667					1.55987	5.78021					3
BHMT	635					-2.50573	-10.2473	-2.08564					3
C1GALT1C1	29071							1.57278	1.52254		2.03349		3
CA1	759		-104.637	-125.515							-11.2115		3
CA7	766		-57.7816	-56.5985								8.86967	3
CA8	767					-12.9442	-29.748				1.99327		3
CACNB2	783		-2.50816	-2.48809							-3.83363		3
CANX	821							2.15044			2.15248	-1.52892	3
CDS1	1040	1.81286				-2.97131		3.89498					3
CES1	1066	-14.4854							-1.93468			-1.88986	3
CHKA	1119							3.74974			2.17429	-1.50789	3
CHST12	55501				2.24606	1.54803		1.90624					3
CHST13	166012					3.83462	3.10543	1.9082					3
CHST3	9469	-2.5947			2.27103					1.63703			3
CHST5	23563		-4.92227	-4.49453							-2.1355		3
CKM	1158	-629.127			-18.0826				12.3052				3
CLOCK	9575					-1.55422	-1.67416					-1.51356	3
CNDP1	84735					-2.55382	-3.14126	-6.6371					3
CNOT2	4848				1.54707			1.65755			1.91077		3
CNOT6	57472				1.52395			2.53826			1.8829		3
CPS1	1373	-2.41355							141.362			-2.06863	3
CTNNB1	1499						-1.50394	1.7195			2.0088		3
DCP2	167227				1.59281			2.00464			2.29388		3
DCTD	1635		1.66577	1.68656							1.61021		3
DDX20	11218				1.63826			2.08212			1.75662		3
DGAT1	8694							1.71931	2.01096		-1.67969		3
DGKQ	1609	1.5355			1.6786			2.93462					3
DHRS3	9249	-2.24743					-1.59216					3.0424	3
DHRS4L2	317749					-2.1176	-2.27218				1.83967		3
DIS3	22894		1.98503	1.96034							2.04403		3
DLAT	1737					-1.81904		1.95398			1.62078		3
DNAJC19	131118					-2.09331	-2.06999			2.24923			3
DOLK	22845				1.77849			2.07457			1.71914		3
DPM3	54344	1.77628						2.14943	1.60501				3
DPYS	1807					-2.96795	-6.47174	-1.59563					3
DSE	29940	-1.73978			1.8825						1.55262		3
EDEM1	9695				1.59262					-1.80885	1.51808		3
EDEM2	55741				2.08408			1.89851			1.85494		3
EEF1D	1936		1.58576	1.58351				2.27626					3
EIF2B2	8892				1.5251			1.96333	1.56919				3
EIF2S1	1965			1.51153	1.6721						1.64914		3
EIF4E	1977					-1.59818	-1.61937				1.51483		3
EIF4G1	1981				1.71496					2.53627	1.71873		3
ELOVL7	79993	-1.8586						5.63946			2.67497		3
ENTPD4	9583					-1.69211			1.55945		1.65905		3
ETHE1	23474		-3.4234	-3.38562								2.56894	3
EXOSC1	51013				1.56478			2.09967	1.60056				3
EXT2	2132				2.3884			1.57229			1.55417		3
F7	2155	6.78034	10.8775	9.85583									3
FBXW2	26190				1.70396			1.75916			1.56512		3
FHL2	2274								5.81074	3.72586		-2.64311	3
FH	2271					-2.07389			1.63059	1.71171			3
FIG4	9896							1.68346	-1.84469	-2.09931			3
FMOD	2331	-2.3827								-1.59941		-3.07103	3
FTCD	10841					-2.81826	-2.88866	-1.91353					3
FURIN	5045				1.67038				2.13167		1.76508		3
GALK2	2585				1.629			1.56047			1.62802		3
GALNT1	2589						1.86137	1.82588		1.90926			3
GANAB	23193				2.10774					1.63063	1.9271		3
GATA4	2626	35.1655	31.7743							7.03785			3
GCGR	2642					-8.23311	-14.8898	-2.03593					3
GCLC	2729				2.11166				4.99933	10.6354			3
GCLM	2730								2.29466	5.96611	1.55048		3
GDA	9615						2.21894		11.7215	38.0078			3
GEMIN4	50628		1.59756	1.65832							1.82933		3
GFPT1	2673							1.79069	2.26308		2.36445		3
GGCX	2677				1.6332				2.00722		1.70614		3
GNAI2	2771				1.638				-1.63645	-2.20413			3
GNB2	2783	1.59247						1.64456			1.51505		3
GNG10	2790				1.62554			1.56196			1.56864		3
GNG3	2785		-7.02811	-6.78793							-2.38544		3
GNG5	2787	1.60063						1.61987			1.50562		3
GNGT1	2792				15.2311	6.56264	3.9799						3
GNMT	27232							-1.9849	-1.89306			-1.79096	3
GPD2	2820							2.47373		1.83681	1.75378		3
GPX4	2879						1.57272	1.5741				1.68399	3
GRHPR	9380					-1.72279	-2.03231	-1.56481					3
GRPEL1	80273		1.54783	1.55962							1.59978		3
GRPEL2	134266		2.23802	2.27473				2.55265					3
GSPT2	23708	-2.25871				-1.7837	-1.81112						3
GSTM4	2948		-1.8091	-1.76603						2.55855			3
GUK1	2987	1.74622				1.65739		2.15683					3
GXYLT1	283464		1.54775	1.55673							2.69276		3
GYS1	2997					1.67047		2.28503		2.02881			3
HAAO	23498	-2.19225					-1.62648	-1.79142					3
HADHA	3030	-1.60343	-1.72142	-1.76268									3
HAO2	51179					-5.71783	-9.49751	-3.51815					3
HAS1	3036	-5.19575							-8.26283	-8.6661			3
HCCS	3052							1.51286		1.50608	1.60958		3
HEXA	3073				1.85405			2.08993			1.71664		3
HIBADH	11112	-1.58283				-2.2516			1.64918				3
HIBCH	26275	-1.53589				-2.68999	-2.52118						3
HPD	3242	-4.62961				-32.874	-23.8036						3
HS3ST2	9956					28.1653				-2.60157	5.76323		3
HS3ST3B1	9953					-3.15405		-2.11866		1.67424			3
HSD3B2	3284	-4.00917	-49.754	-50.7459									3
HYI	81888		-1.58822	-1.67364						-1.94284			3
IDO1	3620				5.4791	9.85456						-2.13714	3
IDUA	3425					2.11766	2.77772	3.92489					3
INPP4B	8821				1.57103		-2.09372		2.85856				3
INPPL1	3636							2.53055	1.60033		1.62321		3
KHK	3795						-5.34			1.70856	-4.11435		3
LCMT1	51451	1.67435						2.58868			1.51008		3
LIPC	3990						5.83049				7.57563	-2.48821	3
LIPE	3991	-22.5732			-2.20399		-2.71271						3
LMAN1	3998						-1.51303		1.57981		1.6197		3
LTA4H	4048							1.69845	-1.67253	-3.22966			3
MANEA	79694				1.62666		-2.05083				1.5736		3
MDH1	4190					-1.96743		1.59359		1.93695			3
MDH2	4191							1.70799	1.81416	2.10086			3
ME2	4200		-1.71458	-1.70681				1.83852					3
MED17	9440				1.51634			1.75508			1.8088		3
MED21	9412					-1.98129	-1.65538	1.66159					3
MED24	9862	1.63875						2.34726			2.10829		3
MED25	81857	1.84131						2.39293			1.67753		3
MED26	9441				1.5836			1.89797			1.51044		3
MGST3	4259		-1.91371	-1.92758				1.82265					3
MLYCD	23417	-1.83813			-1.75216			-1.7102					3
MTHFD2L	441024					-2.37422	-1.72957				1.81186		3
MTMR14	64419							1.80421		-1.68058	1.52798		3
MTMR2	8898				1.58741			2.48916			1.67477		3
MTTP	4547					-3.97644	-32.0058				-15.7531		3
MUC5B	727897	6.09739			-4.01316				15.8767				3
NAT6	24142		1.93322	1.95328				2.27896					3
NCBP1	4686				1.73679					1.7471	2.18273		3
NCOA2	10499					-1.91986	-1.92512	1.67236					3
NCOA3	8202				1.77249			2.0203			1.88724		3
NCOR2	9612					1.7552		2.4591			1.81884		3
NFYB	4801			1.55109				1.87198			1.57439		3
NT5C2	22978					-1.83763		1.69865			1.50537		3
NUP133	55746							2.42541		1.50131	1.90913		3
NUP54	53371				1.59129					1.52296	1.67137		3
NUP88	4927								1.59331	1.59171	1.80003		3
OGDH	4967					-1.57679	-1.62978	1.85846					3
OSBP	5007					-1.95026	-1.82442				1.58427		3
PAFAH1B2	5049				1.59979	-1.58977					1.79362		3
PAOX	196743		-1.57147	-1.69046								1.75779	3
PDE1C	5137	-8.83961									-2.57239	3.52257	3
PDE4A	5141							2.18277		-2.13103	1.74194		3
PDE6B	5158	1.79923				1.95724	2.35018						3
PDHA1	5160					-2.53878				1.50283	1.50476		3
PDHX	8050					-1.54556				1.66233	1.83049		3
PDPR	55066	-1.84129						2.09772				-1.75032	3
PGAM1	5223				1.62851	1.56058				2.32287			3
PGLS	25796					1.58953	1.7794	1.94092					3
PHKA2	5256	-1.55277				4.00201					1.8047		3
PHKB	5257					-1.82526		1.5037				-1.50163	3
PI4KA	5297					-1.51894	-1.73976	1.78263					3
PIGF	5281							2.15439		1.67248	1.85397		3
PIGG	54872				1.5971			2.15413			1.92109		3
PIGH	5283					-2.04034	-1.9797	1.74718					3
PIGN	23556							1.54323		1.65293		-1.61233	3
PIGO	84720				1.56335			1.77452			2.15869		3
PIK3C2A	5286					-1.61068	-2.09818					-1.51832	3
PIK3C2B	5287							3.29391		-1.83572	1.63992		3
PIP5K1A	8394				1.53853			2.1279			1.7734		3
PISD	23761				1.60892			1.57399			1.65318		3
PLA2G1B	5319					2.05174			-4.27956	-33.5525			3
PLD2	5338					1.54776	2.11891	1.69169					3
PMPCA	23203		1.53136	1.52243							1.76036		3
PNLIPRP2	5408		-5.38845	-5.49149							-2.58053		3
PNMT	5409								-2.13879	-2.71088		7.32308	3
PNPLA2	57104	-3.54021			-1.50558					-2.39125			3
PNPLA3	80339					-3.7742				2.2533	6.19249		3
POLR2B	5431							1.80267		1.65408	1.76952		3
POLR2F	5435				1.68903			1.90111		1.89489			3
POLR2I	5438							1.69951	1.63655	1.83623			3
POLR3B	55703					-2.6599	-1.79585				1.62959		3
POLR3GL	84265	-1.56142						1.51049		-1.58671			3
POLR3H	171568		1.68431	1.72154				1.7011					3
PPARA	5465	-2.84953				-2.23351	-2.08728						3
PPP1CA	5499	2.06063			1.6355			1.9563					3
PPP2R1B	5519	-2.91302					-1.89708				1.95036		3
PRKAB1	5564					-1.73169		2.51521		-1.66148			3
PROZ	8858					-25.5839	-39.7176	-2.25241					3
PSAP	5660				1.5133					-1.5237	1.57598		3
PSMC1	5700				1.78543			1.61656		1.59377			3
PSMC3	5702				1.63914			1.79703		1.51027			3
PSMD13	5719				1.72131			1.84585			1.81059		3
PSMD1	5707							1.86334		1.54064	2.11987		3
PSME1	5720	1.57463			1.62941			1.72867					3
RBP2	5948								-8.20275	-22.254	-45.1929		3
RFK	55312		-1.54323	-1.67927							1.66326		3
RPL13	6137					1.94682	1.87196	1.78327					3
RPL18A	6142					1.84006		2.09043		1.66693			3
RPL21	6144	-2.28526	2.03055	1.90855									3
RPL24	6152			1.5046				1.78096		1.53136			3
RPL27	6155			1.51731			1.99524	2.75182					3
RPL32	6161		1.50078	1.50639				2.00947					3
RPL4	6124		1.55213	1.60289				1.91714					3
RPL6	6128		1.51199	1.53533				2.09074					3
RPL7A	6130		1.67267	1.6851				1.98228					3
RPLP2	6181					1.60853	1.60095	2.34793					3
RPS15A	6210					1.70386	1.66886	1.71261					3
RPS4X	6191		1.72428	1.76104				1.91592					3
RPS6	6194		1.51087	1.56681				1.94394					3
RPS8	6202					1.85104		2.11337	1.50653				3
RRM2B	50484							1.65133		-1.64614	2.19336		3
SDC2	6383							1.69489	-1.99263			-2.17432	3
SEC11A	23478				1.52178			1.80077			1.84536		3
SEC11C	90701	1.52254						2.15394	2.14001				3
SEC13	6396	1.54061						2.03277	1.53307				3
SEPHS1	22929					-1.62508		1.73783			1.7966		3
SGMS1	259230					-1.97787	-2.02303			-1.81719			3
SI	6476		-6.67721	-7.40295							-8.36518		3
SLC23A2	9962	-1.71358			1.62437							-1.50975	3
SLC25A1	6576				1.73594			1.57049		1.98936			3
SLC37A4	2542					1.57878			1.8831	1.55625			3
SLC5A5	6528				-17.0881						-8.184	-5.76375	3
SMG1	23049				1.55503						2.00387	-1.65373	3
SPTLC2	9517					-1.90852		1.57149			1.7549		3
SRP54	6729	1.53028							1.83584		1.65398		3
SRP72	6731			1.52963				1.68856			1.72383		3
SSR4	6748	1.78635						1.96595	2.75005				3
ST6GAL1	6480					-5.13132	-6.26267				2.04449		3
ST6GALNAC4	27090	1.53265						3.32294		-1.89815			3
SUCLA2	8803	-1.8917				-2.1958	-1.6764						3
SUMF2	25870				1.88219			1.85346			1.84766		3
SUOX	6821				-1.6119	-2.2704	-1.53221						3
SYNJ1	8867			-1.51058				1.50403		-1.81581			3
TBCA	6902		1.57807	1.64586				1.81417					3
TEAD1	7003	-2.50033						1.56475		-1.53121			3
THTPA	79178					-1.67732	-1.73309	2.11402					3
TIMM44	10469							1.96271		2.08462	1.52538		3
TK2	7084	-2.23094					1.55047			-2.12979			3
TXNDC12	51060				2.19214			1.71569			2.21789		3
UGCG	7357	1.98545	-1.63526	-1.59476									3
UGT1A10	54575		-10.665	-11.2443						349.426			3
UGT2B15	7366		-13.4332	-14.5718							-1.89032		3
UPRT	139596						-1.55928	1.56912		-1.50274			3
VAC14	55697				1.86135			2.10596			1.83917		3
VAPA	9218		-1.72736	-1.65464				1.5327					3
VAPB	9217							1.66254			1.79141	-1.66428	3
VKORC1	79001	1.50028			1.91254	1.78461							3
WARS	7453				4.52885						3.84905	1.6055	3
ACER1	125981				-5.17487						-38.0472		2
ACOT8	10005	1.56748						1.92669					2
ACP2	53			-1.53557	1.63862								2
ACSM2A	123876					-1.60389		-1.66164					2
ACYP2	98	-1.59237			-2.22321								2
ADCY8	114					10.4798						103.354	2
ADH4	127							-3.49173			-3.54265		2
ADI1	55256					-2.06301	-2.31324						2
AHCYL1	10768					-1.89844	-1.58139						2
AKR1B1	231		-1.51741			-2.00068							2
ALB	213						-142.797	-2.45781					2
ALG12	79087				1.51705			2.15002					2
ALG2	85365				1.51039						1.59771		2
ALOX15	246				-4.54857				-3.90301				2
AP3M1	26985							1.82342			1.59991		2
ARF3	377				1.5711			1.86924					2
ARSF	416					-1.62337	-7.30135						2
ASL	435						-1.75879			-1.531			2
B3GNT9	84752				2.45352	1.80851							2
B4GALT1	2683				1.70224						1.79114		2
BCAN	63827		1.91921	1.88022									2
BLVRA	644						2.02408	3.83036					2
BPGM	669				2.31592			2.5539					2
CA14	23632	1.83352									-3.6121		2
CALM3	808				1.69785			1.91339					2
CASC3	22794							2.51827			1.63534		2
CCBL2	56267					-1.79536	-1.57038						2
CCNC	892					-1.62831				1.55121			2
CDIPT	10423				1.68002			1.56724					2
CDK19	23097							2.0443			1.78441		2
CDX2	1045									114.359	2.04614		2
CHCHD4	131474					-1.7799		1.91362					2
CHIA	27159									-17.8139	-7.27877		2
CHKB	1120						-1.71912	1.84948					2
CMAS	55907								1.72928	2.75284			2
CNOT10	25904							2.11583			1.9786		2
CNOT8	9337							1.63117		-1.61574			2
COL4A3BP	10087	-1.96449								-2.07496			2
COMT	1312		1.95013	1.9486									2
COX17	10063	1.71255						1.59224					2
DAO	1610					-10.0543	-9.43267						2
DBT	1629					-3.21435	-2.26814						2
DCP1A	55802	-1.60995								-1.6302			2
DDC	1644					-3.28362	-5.26513						2
DGKE	8526				1.80255		-1.76243						2
DHRS4	10901					-2.23813	-2.31531						2
DLST	1743					-2.06724	-1.51357						2
EDC4	23644							1.98314			1.6626		2
EDEM3	80267							1.75528			1.85488		2
EEF1G	1937							1.91728	1.52772				2
EIF2B3	8891			1.55741				1.50615					2
EIF3K	27335							2.09659		1.50786			2
EIF4A2	1974							1.75368		1.77521			2
ELOVL3	83401	-3.76928			-23.0081								2
ENPP6	133121					-37.6093	-21.345						2
ENPP7	339221						-3.74877				-92.151		2
EP300	2033							1.56089			1.503		2
ESRRA	2101							1.7909		1.53082			2
EXOSC6	118460				1.5561						1.51499		2
FAU	2197					1.58947		1.61983					2
FBP2	8789				-44.3188						-5.57143		2
FBXW5	54461		-1.57676	-1.60916									2
FDPS	2224	1.5459						2.79423					2
FUK	197258							1.82604			1.85761		2
G6PC	2538					-11.5353	-44.4312						2
GALNT11	63917						1.99607	2.02819					2
GALNT9	50614					1.71396						-2.39462	2
GCG	2641		-41.9971	-31.9187									2
GC	2638						-6.83601	-1.54531					2
GFPT2	9945				2.12747							-1.72043	2
GGPS1	9453	1.66987						2.32853					2
GGT1	2678				2.60794					-2.44011			2
GLRX	2745									-2.85303	-1.50753		2
GLUD2	2747					-1.70444	-1.66935						2
GLUL	2752							6.6559				-2.10373	2
GMPPB	29925	1.58142						1.91064					2
GMPR2	51292						-1.50279	1.62619					2
GNB1	2782				1.86269			1.7429					2
GNB3	2784								4.11353	3.48243			2
GNB4	59345				1.92784	1.55835							2
GNG13	51764	125.376		-6.05922									2
GNPAT	8443							2.89036			1.66602		2
GPAT2	150763					2.4391			3.42141				2
GPHN	10243					-2.3311					1.68253		2
GSTA4	2941							3.39171	-1.69041				2
HACL1	26061					-2.20931	-1.50247						2
HS6ST3	266722	7.017										-3.23938	2
HSD17B12	51144					-2.05252					1.70807		2
IDH3A	3419		-1.69658	-1.69379									2
IDH3G	3421							2.09475	1.50674				2
IDS	3423				1.52627					-1.55756			2
INHBE	83729					12.0807				11.3535			2
INPP4A	3631				1.95885			1.93361					2
IPPK	64768	1.6554								2.21304			2
KCNB1	3745	-8.74878									-5.64219		2
LDHC	3948	2.32145							2.126				2
LDLRAP1	26119					-1.72869	-2.21691						2
LRP2	4036									-5.53384		-2.95575	2
LSM3	27258					-1.75019		1.75135					2
LSM6	11157				1.7687						1.6474		2
LSS	4047							1.74181	-1.67065				2
MAN1A2	10905					-1.60774	-1.69526						2
MAPKAPK2	9261	2.04149						2.35503					2
MAT2A	4144							1.62323				-1.70606	2
MCEE	84693					-1.94677	-1.68044						2
MED12	9968							2.71182			1.80955		2
MED22	6837				1.83301			3.2011					2
MED23	9439							1.82228			1.80146		2
MED8	112950							1.78959	1.63171				2
MGAT1	4245					1.63525				-1.5042			2
MINPP1	9562				2.41152						2.00771		2
MOCS2	4338					-1.73903	-1.74782						2
MTHFR	4524							2.34702		-2.24645			2
MTMR6	9107								-1.53163	-1.80202			2
MTMR7	9108							6.14167				1.71012	2
MTR	4548						-1.53911	2.78472					2
MUC12	10071		-2.77602	-2.73259									2
MUC16	94025				-3.42493				7.90125				2
NME6	10201					-1.76835		2.49135					2
NME7	29922				1.69098			2.26427					2
NMNAT2	23057	-3.6138							6.84441				2
NNT	23530				-1.97447	-2.6591							2
NUDT2	318							2.4693		1.6337			2
NUP214	8021							1.85323			1.62891		2
PAFAH1B1	5048		-1.52146	-1.50915									2
PANK2	80025							1.54516			1.57504		2
PAX6	5080				2.73969					2.29371			2
PCCB	5096					-2.62819				1.91712			2
PCYT1A	5130				1.98561					2.48399			2
PCYT2	5833					-2.66413		1.67755					2
PDE6D	5147				1.52763			2.09266					2
PFDN5	5204					1.53145		1.67424					2
PFKL	5211						-1.64997	1.54507					2
PGAM4	441531				1.62082					1.97507			2
PI4K2B	55300										1.61792	-1.91077	2
PIGK	10026					-1.74028					1.63536		2
PIGQ	9091	2.22855				-1.60473							2
PIK3CB	5291							1.76217			2.25451		2
PIK3R4	30849				1.84196						1.62606		2
PIKFYVE	200576	-1.65769									1.74096		2
PIP4K2A	5305				1.66381					-1.54313			2
PKLR	5313					-1.77045	-4.68966						2
PLBD1	79887								-1.98287		2.63546		2
PMVK	10654	1.70001						2.41782					2
PNPLA4	8228					-1.93077	-1.5914						2
PNPLA8	50640					-1.68434	-1.58738						2
POLR2A	5430						-1.53659				1.61202		2
POLR2C	5432				1.50445			1.57463					2
POLR2J2	246721					1.54313		2.12899					2
PPOX	5498	1.6298						3.36099					2
PPP1CB	5500							1.5213		1.50427			2
PPP1CC	5501							2.28527		1.61079			2
PPP2R5D	5528				1.68645			2.3407					2
PRDX6	9588		-2.47014	-2.457									2
PRKAA1	5562	-1.64837									2.02317		2
PRKAB2	5565							2.47709		1.78298			2
PRKAR1A	5573					-1.58368				-1.75485			2
PRKAR1B	5575				1.92657							1.56345	2
PRODH2	58510					-5.46783	-19.2002						2
PSMC5	5705							1.89852		1.51622			2
PSMD5	5711				1.73366						1.71477		2
PSMD8	5714							1.78233		1.86			2
PSMD9	5715				1.70973			1.78241					2
PTDSS2	81490							2.53014			1.59579		2
RAP1B	5908				1.97244						1.62692		2
RBM8A	9939							2.19751			1.59674		2
RPL11	6135	-1.56464				1.51115							2
RPL17	6139							2.15737			1.63231		2
RPL34	6164	-1.60671						1.54626					2
RPL3L	6123	-16.4529			-13.9421								2
RPL41	6171					1.5606		1.6078					2
RPL5	6125	-1.64504						1.93386					2
RPL9	6133	-1.51384						1.78482					2
RPLP1	6176							2.39861		1.7239			2
RPS11	6205					1.58247		2.07806					2
RPS12	6206							2.08599			1.59759		2
RPS14	6208					1.87851		1.97174					2
RPS17	6218							2.09126		1.65249			2
RPS25	6230	-1.71444						1.80206					2
RPS27A	6233							2.09789		1.55779			2
RPS27	6232					1.69915		2.05468					2
RPS3A	6189	-1.52369						1.74446					2
RPS4Y1	6192						-2.47537	1.88043					2
RPSA	3921						1.5718	2.78276					2
SAMM50	25813							2.26023		1.55764			2
SDHB	6390					-1.99044	-1.75427						2
SEC61B	10952				1.60075			1.61476					2
SIN3B	23309				1.98046			2.41784					2
SLC10A2	6555		-121.896	-117.667									2
SLC16A8	23539								5.3476	5.94279			2
SLC25A16	8034	-1.5407							1.53619				2
SMPD2	6610	1.71065						2.36432					2
SNUPN	10073				1.53759			1.78779					2
SPCS1	28972					-1.98818		1.88122					2
SPHK2	56848					-2.26875	-2.25562						2
SPTLC1	10558							1.71011			1.67888		2
SRR	63826					-2.08168				-1.53035			2
ST8SIA6	338596								-11.3477	-7.50733			2
STS	412	-2.31256								-2.85846			2
SULT2A1	6822		-5.36306	-6.05805									2
SUMF1	285362					-2.00111		1.58777					2
SYT5	6861	36.1464								14.5738			2
TEAD2	8463				2.86893			4.79302					2
TEAD3	7005							2.5341		1.66785			2
TECR	9524							1.77672		1.71069			2
TIAM2	26230									1.63037		-2.25577	2
TIMM8B	26521							1.6411		1.97839			2
TMLHE	55217	-1.54532								1.54197			2
TNPO1	3842							1.6515			1.78823		2
TOMM22	56993							1.80197		2.23456			2
TOMM7	54543	-1.52181						1.69773					2
TUBA3D	113457	7.74587				7.99553							2
TUBB1	81027								-5.45758	-8.34458			2
UGT1A7	54577									414.891	-18.867		2
UGT1A8	54576		-17.9826	-18.4555									2
UGT2A1	10941					-27.5927	-7.64939						2
UPF2	26019							1.72994			1.80588		2
UPP2	151531					-27.2468	-14.6898						2
WARS2	10352							1.77829			1.85303		2
XRN1	54464				1.76281						1.88428		2
YWHAB	7529							1.78418			2.00181		2
ZFP36L1	677	-1.64174										1.88077	2
ABCC8	6833	1.66921											1
ABCG5	64240										-6.03111		1
ABCG8	64241										-7.33502		1
ACMSD	130013	6.29567											1
ACOT12	134526							-1.63375					1
ACTB	60							1.53187					1
ADCY1	107					-1.58049							1
AGPAT1	10554							2.60426					1
AGPAT3	56894						-1.93839						1
AK5	26289	-5.41823											1
AKR1A1	10327						-1.57375						1
AKR1D1	6718							-2.43952					1
AKT1	207				1.66758								1
ALG10B	144245				1.61675								1
ALG13	79868							1.93799					1
ALG14	199857							1.60971					1
ALG9	79796							1.77375					1
ALOX12B	242									42.0731			1
AMY2A	279				-198.233								1
AOC2	314	-6.08144											1
APOA2	336							1.79668					1
APOA5	116519							-1.93811					1
ASAH2	56624										-13.001		1
BCKDHA	593						-1.52226						1
CA6	765				-287.144								1
CALM2	805							1.7025					1
CDS2	8760				1.8225								1
CEPT1	10390										1.75206		1
CGB8	94115				67.8377								1
CLPS	1208										-7.1296		1
CMPK1	51727										1.76083		1
CNDP2	55748					1.50942							1
CNOT4	4850							1.71463					1
CNOT7	29883										2.06182		1
COQ2	27235										1.67368		1
COX10	1352					-1.61649							1
COX15	1355										1.70804		1
CS	1431							2.66227					1
CUBN	8029						-6.25605						1
DAD1	1603							1.9659					1
DBH	1621							-7.8316					1
DCP1B	196513							1.72143					1
DECR1	1666					-1.85049							1
DGKI	9162											-6.48097	1
DHPS	1725							1.7113					1
DLD	1738					-2.08218							1
EEF1A1	1915	-1.62818											1
EEF1B2	1933							1.81075					1
EIF2B1	1967							2.07534					1
EIF2B4	8890							2.06771					1
EIF3A	8661										1.75942		1
EIF3F	8665							1.77275					1
EIF3G	8666							1.99258					1
EIF4B	1975	-1.5996											1
EIF5	1983						-1.50444						1
ELOVL1	64834							2.73806					1
ETF1	2107								-1.54497				1
F9	2158							-2.56177					1
FAH	2184	-1.72531											1
FAM153A	285596					9.91031							1
FBXW4	6468							1.71339					1
FBXW7	55294	-2.07589											1
GALNT13	114805								-3.12647				1
GALT	2592	-1.60102											1
GBE1	2632	-2.98789											1
GCKR	2646							-1.54298					1
GCNT1	2650								1.54247				1
GGT7	2686							1.78267					1
GIP	2695										-46.81		1
GLP1R	2740											3.7973	1
GLUD1	2746					-1.53573							1
GNAS	2778							1.91848					1
GNPDA2	132789							2.26229					1
GSTK1	373156						1.55912						1
GSTO1	9446				2.10364								1
GUCY2C	2984							66.3482					1
GUSB	2990										1.95856		1
GYG1	2992							1.9876					1
GYS2	2998							-3.10033					1
HAL	3034								10.2745				1
HAO1	54363							-1.86986					1
HDAC3	8841							1.60709					1
HEMK1	51409							1.65403					1
HMOX2	3163	1.60427											1
HSCB	150274									1.61602			1
HSD3B1	3283				-786.573								1
IDH3B	3420							1.80107					1
IDO2	169355							-2.42523					1
INHBC	3626							-1.63816					1
INPP1	3628	-2.2091											1
INPP5B	3633				1.54698								1
IQGAP1	8826										1.73127		1
ISL1	3670										-1.89697		1
KDSR	2531										1.52277		1
LCMT2	9836					-1.62651							1
LCT	3938										-20.9854		1
LEP	3952	-70.2173											1
LHB	3972						9.32498						1
LIPF	8513										-9.44484		1
LPA	4018							-4.16527					1
MAPK14	1432							1.5052					1
MCFD2	90411											-1.59491	1
MED11	400569									-1.58374			1
MED13L	23389											-1.79617	1
MED16	10025							1.5842					1
MED29	55588							1.75969					1
MED31	51003							1.57891					1
MED4	29079										1.63285		1
MED7	9443							2.04619					1
MED9	55090					-1.70065							1
MGAT2	4247				1.97231								1
MGST2	4258				-1.59347								1
MLX	6945							1.58518					1
MTMR3	8897							1.87604					1
MUC7	4589				-137.343								1
MVD	4597							2.81266					1
NADK	65220				1.50522								1
NAGLU	4669				1.50288								1
NAMPT	10135							-1.81392					1
NCOR1	9611					-1.6094							1
NDST2	8509							1.93729					1
NRF1	4899							2.05055					1
NUDT9	53343					-1.7464							1
OAZ1	4946							1.87719					1
OCRL	4952							3.07792					1
OXCT2	64064						4.78883						1
PCSK1	5122				2.02524								1
PCYT1B	9468									2.05373			1
PDE11A	50940					1.82909							1
PDHB	5162					-2.45482							1
PFDN1	5201							1.94301					1
PFKFB1	5207	-14.5351											1
PGM2	55276									2.64916			1
PHAX	51808							1.80634					1
PHKG1	5260				-11.293								1
PI4KB	5298							2.83401					1
PIGB	9488							1.81326					1
PIGV	55650					-1.57336							1
PIP4K2B	8396							2.42583					1
PIP5K1C	23396							2.67711					1
PLA2G2F	64600				3.09595								1
POLE4	56655				1.74649								1
POLR2L	5441							2.02214					1
PPCDC	60490							2.83722					1
PPP2CA	5515							1.57169					1
PPP2R1A	5518							2.20298					1
PPP2R2A	5520										1.53734		1
PRKAG2	51422						-2.00324						1
PSMD6	9861					-1.75727							1
PSMF1	9491										1.63575		1
PTEN	5728	-1.64121											1
RPL10A	4736							2.02382					1
RPL13A	23521							2.10681					1
RPL15	6138							1.70763					1
RPL26	6154	-1.58885											1
RPL3	6122							1.50496					1
RPS10	6204							2.68199					1
RPS13	6207							1.65563					1
RPS23	6228							2.12669					1
RPS26	6231							1.84797					1
RPS29	6235							1.73797					1
RPS9	6203							1.75647					1
SAR1B	51128								1.78				1
SAT1	6303										1.72105		1
SEC24C	9632							1.95187					1
SGSH	6448							2.20866					1
SLC10A1	6554							-2.06404					1
SLC22A1	6580							-3.74536					1
SLC25A11	8402					-1.5084							1
SLC25A6	293							2.23544					1
SLC2A2	6514										-11.5446		1
SLCO1B1	10599							-1.59029					1
SRD5A2	6716							-2.85234					1
SRP14	6727							1.93949					1
SRP19	6728							1.96933					1
SRP68	6730							1.85919					1
SRPR	6734										1.51054		1
ST8SIA2	8128	-3.88926											1
STAR	6770									22.6995			1
STK11	6794							1.75339					1
TAT	6898							-1.71007					1
TBCC	6903							2.63675					1
TIMM22	29928							1.70979					1
TNKS1BP1	85456				1.5261								1
TPO	7173											-3.4866	1
TXNRD2	10587					-1.66971							1
UBA52	7311							1.98574					1
UCK1	83549							1.6489					1
UGT1A3	54659					15.2122							1
UGT2B10	7365							-2.08628					1
UGT2B11	10720							6.92718					1
UGT2B28	54490	-5.38658											1
UPB1	51733						-20.2627						1
UROC1	131669							-3.48793					1
UROS	7390							1.53125					1

## Sheet: Table 3-3
Table 3-3 The list of metabolic genes that no less than 8 cancer types.
GENE ID	GENE Symbols	BRCA	COAD	COADREAD	HNSC	KIRC	KIRP	LIHC	LUAD	LUSC	STAD	THCA	count
32	ACACB	-13.1473	-3.34302	-3.33315	-4.05897	-2.06013	-2.56659	-1.53089	-2.56523	-4.12457	-2.56693	-2.87971	11
125	ADH1B	-34.4866	-17.9081	-15.615	-33.1846	-7.22488	-14.097	-2.34783	-8.76393	-30.532	-3.35473	-11.0112	11
1978	EIF4EBP1	2.38842	2.5313	2.64198	2.32553	3.77948	2.11225	1.80169	3.29922	7.84087	2.08271	1.68016	11
2788	GNG7	-2.58139	-5.52712	-5.25589	-4.06751	-2.87157	-2.5516	1.59459	-1.97966	-3.85604	-3.45759	-1.6424	11
84264	HAGHL	14.4615	11.9283	12.3044	3.77672	2.77911	4.7957	17.4209	2.67446	1.90582	5.81463	3.29402	11
5427	POLE2	3.63856	2.35157	2.47224	2.95421	2.4616	3.88591	7.27267	9.76246	9.59926	4.4536	1.8818	11
8877	SPHK1	1.62064	3.7109	3.8086	2.91213	3.16191	7.38749	7.76558	1.53252	2.96157	2.58481	2.26922	11
7083	TK1	7.82995	1.82152	1.92592	4.7656	1.77642	2.33386	8.62089	7.19608	12.4162	2.84898	2.08918	11
10381	TUBB3	8.77565	2.96763	2.94331	4.55541	2.01702	11.2146	4.74261	22.3309	9.04691	3.15342	5.37996	11
1462	VCAN	2.81937	3.26229	3.41318	4.27853	3.32445	7.8444	7.21025	3.36531	2.07449	4.67941	3.40897	11
2182	ACSL4	-2.40191	2.07282	2.20193	1.54536	-3.10364	-2.12358	6.117	-1.89083	-2.69028	2.03251	1.05572	10
1645	AKR1C1	-11.7384	-2.13077	-2.0353	5.52346	-2.31653	4.60314	2.30166	10.2602	25.2415	-3.19579	-1.40988	10
1646	AKR1C2	-10.3412	-2.46009	-2.46019	4.19291	-2.27298	8.85892	2.85584	23.5961	46.6231	-3.24869	1.3789	10
316	AOX1	-5.22271	-3.1639	-3.36124	-4.21837	-2.86474	-3.20538	-1.80674	-2.09778	-8.31676	-1.77547	-7.85151	10
440	ASNS	1.95388	2.8967	2.92409	2.94242	1.57144	2.63681	5.75846	3.44511	5.32505	2.07838	1.27407	10
771	CA12	3.23727	-4.32582	-4.24482	1.61468	-1.5669	-3.78505	12.9436	3.31302	8.49739	1.12166	5.67181	10
760	CA2	1.8562	-30.2255	-29.621	3.06858	-2.70545	-2.66992	-1.53548	-2.43569	-2.0188	-2.00012	2.59405	10
857	CAV1	-10.3504	-3.96861	-3.30494	4.40837	4.28529	1.00176	2.12165	-10.3313	-8.95817	-2.1507	-1.50724	10
948	CD36	-18.057	-4.35665	-4.04824	-1.90155	4.35365	-2.48343	2.49168	-7.12127	-7.40523	-3.00109	-1.4857	10
1464	CSPG4	-1.75894	-2.1519	-1.9945	4.96498	6.39115	-2.37818	7.91926	-1.55926	1.16404	-2.36333	2.77741	10
1634	DCN	-3.91437	-3.03426	-2.74699	-1.28959	-6.50431	-7.73202	-3.05368	-2.56547	-2.52148	-2.00128	-4.23266	10
56915	EXOSC5	1.61731	2.59806	2.53829	1.61986	2.18903	1.65359	2.45651	2.46626	3.44473	2.36366	1.36047	10
23171	GPD1L	-1.62386	-2.46536	-2.55304	-4.86787	-3.18508	-1.50929	2.99008	-1.65755	-3.96162	-1.23554	-1.55734	10
2875	GPT	-2.1318	-9.76457	-10.1502	-8.45477	-1.63757	-3.59493	-1.28383	5.23136	3.10013	-3.13112	3.69821	10
2878	GPX3	-13.0955	-4.49021	-4.56624	-3.96131	-3.22438	-11.2078	1.60546	-4.44206	-10.6083	-3.99509	-1.77914	10
3161	HMMR	8.65578	2.68441	2.77922	3.62291	2.4727	4.33688	20.7527	11.219	10.3806	6.33408	-1.13926	10
259307	IL4I1	5.239	1.84917	1.81076	3.81979	4.09845	2.92897	4.54583	4.46387	2.97566	3.76556	1.53482	10
3614	IMPDH1	1.64752	3.13271	3.12793	2.99157	1.68559	1.5618	3.24666	1.38096	1.52125	1.79884	1.50179	10
3706	ITPKA	12.4922	-3.02892	-3.05957	3.61993	15.7617	6.90961	10.8306	52.702	16.1938	-1.20032	4.29869	10
197257	LDHD	-3.32282	-8.23866	-8.39865	-3.94867	-5.13133	-1.55406	-1.73477	-1.02926	-1.56827	-2.19461	-1.81939	10
9926	LPGAT1	1.17753	1.74495	1.75167	1.81285	1.56217	1.85298	2.69992	2.16633	1.54935	1.92558	-1.67184	10
10894	LYVE1	-31.5148	-14.533	-14.0079	-3.74643	-1.16108	-4.89291	-4.36743	-8.9936	-14.6148	-6.08287	-9.5681	10
25902	MTHFD1L	1.56041	5.59522	5.80423	3.12073	1.37219	1.93973	5.42979	1.91379	1.99586	5.79304	2.33891	10
654364	NME1-NME2	2.49099	3.06318	3.29864	1.92935	2.08584	3.6714	2.21005	2.13029	3.09879	2.30407	1.3108	10
9572	NR1D1	-1.63387	1.92168	1.83062	1.50561	1.59069	2.03313	1.0615	1.66598	1.97734	1.81182	3.5891	10
4969	OGN	-5.0727	-12.4603	-10.5063	-4.04317	-2.51306	-6.2052	2.76143	-4.00626	-16.8233	-1.93648	-5.41193	10
5050	PAFAH1B3	5.0291	2.73731	2.74791	2.13072	-1.07903	1.56079	6.4014	5.12825	5.29094	3.05165	1.90969	10
5549	PRELP	-4.29739	-3.7402	-3.61586	-1.90365	-2.22544	-3.05842	-1.32889	-2.69378	-5.10043	-2.02576	-2.0059	10
5831	PYCR1	4.52431	3.45208	3.47959	2.35212	2.94119	6.42406	10.1934	14.7918	7.84913	2.68567	1.49847	10
6241	RRM2	9.65289	2.74803	2.98661	2.8271	4.00575	7.08607	14.2852	10.8163	15.5184	4.17818	-1.10203	10
57761	TRIB3	2.97787	13.8364	14.1189	3.10733	7.71142	3.90157	1.86447	2.61558	3.48896	6.51371	3.00625	10
7298	TYMS	4.35679	1.47908	1.62866	3.24389	4.25287	3.69096	6.05953	5.16188	6.82755	4.36994	2.5959	10
8714	ABCC3	1.09768	-1.70643	-1.77151	1.94547	4.55255	4.67722	1.55213	6.15543	1.25754	2.14246	5.67174	9
9429	ABCG2	-3.05848	-29.8379	-33.8224	1.17548	1.85948	-3.18001	-1.07079	-4.22352	-3.453	-4.49866	1.68977	9
10449	ACAA2	-2.38524	-3.06926	-3.26079	-1.9108	-1.35101	-1.60158	-1.96781	-1.51512	-2.37837	1.53952	1.12755	9
100	ADA	1.30839	2.04028	2.07756	4.02914	4.45509	2.46264	2.92263	2.15168	4.03022	-2.08298	-1.04034	9
191	AHCY	1.59076	2.89522	2.85603	1.44974	-1.5268	-1.64189	1.59949	2.06543	3.30882	2.35128	1.05006	9
8644	AKR1C3	-5.48928	-1.84113	-2.09139	5.53464	1.45533	1.97821	4.66116	3.90214	10.3226	-1.71677	1.37947	9
219	ALDH1B1	1.54617	1.6176	1.56984	1.28947	-2.50583	-2.09634	-1.64571	2.28912	1.79679	1.54008	-1.97184	9
4329	ALDH6A1	-2.01586	-1.83691	-1.78939	-2.08058	-9.56909	-7.99091	-2.48541	1.08913	-1.70098	-1.4888	-1.8366	9
10195	ALG3	2.0501	1.91421	1.87231	2.93146	1.15349	1.6891	2.36348	2.34506	4.67059	2.81692	1.08681	9
471	ATIC	1.702	2.23794	2.21794	2.0379	-1.15212	1.33569	2.39103	2.54542	2.06593	2.60113	1.84737	9
762	CA4	-43.2448	-38.5958	-52.7548	-5.404	-2.98579	-23.1509	21.5181	-20.0217	-45.0145	2.1042	-2.33925	9
79586	CHPF	2.48412	3.36199	3.39754	2.82398	1.54225	1.86699	1.39143	2.56738	2.43045	2.21876	-1.0571	9
1789	DNMT3B	2.82902	4.28477	3.98148	6.96703	1.33795	2.79271	7.10531	5.25836	8.17068	9.8985	-1.49972	9
1841	DTYMK	2.02174	2.09837	2.15368	2.55002	1.20141	1.67129	4.00012	2.67651	3.20809	2.56978	1.19249	9
1962	EHHADH	-2.19595	-1.96518	-2.07194	1.78953	-1.66506	-2.4262	-1.6098	1.18843	2.23417	1.37625	-1.57305	9
2053	EPHX2	-1.51267	-2.71675	-2.67352	-2.48721	-2.82398	-3.4091	-1.93487	-1.5639	-1.47249	-1.79042	-1.2841	9
2530	FUT8	1.91597	1.96756	2.07653	1.79111	-1.06105	2.36541	1.79626	2.85039	1.80916	1.72173	1.09449	9
79017	GGCT	2.34915	2.62485	2.59683	1.69066	-1.42473	1.12235	2.27039	3.44078	4.08759	2.77844	4.18829	9
64841	GNPNAT1	1.71082	1.76674	1.87269	2.06055	-1.69995	-1.79154	-1.32091	2.89721	2.17349	2.60367	1.00294	9
2819	GPD1	-38.0125	-1.01821	-1.02841	-29.2657	-3.34115	-2.87032	-2.0878	-14.7976	-36.5711	-2.05912	2.35445	9
3099	HK2	-1.07396	-2.02532	-2.07702	1.65028	10.0862	10.7851	5.30653	-1.14711	2.3933	3.07549	1.71929	9
3251	HPRT1	2.09601	1.97957	1.95194	2.63724	-1.79029	-1.54302	1.28045	2.23896	3.38514	2.55623	1.09797	9
3704	ITPA	1.6478	1.74355	1.71965	1.66168	1.16773	1.72292	2.41486	1.65954	1.71001	2.15051	1.04325	9
79888	LPCAT1	2.23089	2.25133	2.33079	4.13429	5.23959	1.91826	4.38002	1.06277	-4.11785	3.21159	1.34267	9
57134	MAN1C1	-1.16616	-1.88943	-1.84335	-1.96397	-5.16616	-6.8271	-1.94496	-1.52083	-2.31826	-1.0387	-1.74853	9
11320	MGAT4A	1.71521	-2.0824	-2.20495	-1.64101	-1.73096	-1.95355	1.90908	-1.24991	-2.47958	1.58334	-1.07093	9
4282	MIF	3.42655	2.52608	2.58254	2.42923	2.46786	1.39633	2.62756	3.14208	5.09677	1.913	1.23636	9
10797	MTHFD2	2.68388	2.92252	3.11693	2.33452	1.8059	1.43387	1.95994	3.09386	4.19965	3.77847	1.41861	9
4830	NME1	3.44996	3.19622	3.30553	2.08304	1.48055	2.97407	3.4389	4.97322	4.83286	3.1901	1.31052	9
23225	NUP210	3.50419	2.77544	2.86828	2.74921	-1.23492	1.03204	3.18656	2.39616	2.29992	2.70541	-1.62723	9
5091	PC	-3.0469	-2.05433	-2.07312	1.97848	-2.8483	-3.32712	-1.27638	3.66869	4.15216	-1.04225	2.7807	9
5138	PDE2A	-8.97271	-6.03409	-5.42725	-1.5296	-1.13266	-10.9753	-1.94771	-3.38571	-7.01498	-2.68028	-1.15535	9
5150	PDE7A	1.21869	2.04274	2.08256	2.68486	2.09902	1.5546	2.78058	1.25178	1.75384	2.88927	-1.57994	9
10471	PFDN6	2.0857	1.81752	1.77541	1.71167	1.10852	1.62519	3.00473	2.22147	1.95239	2.08721	1.16355	9
5210	PFKFB4	2.33936	1.59871	1.57236	2.37258	4.96709	2.18668	5.33697	1.88992	2.54549	-1.1069	1.17815	9
5230	PGK1	1.71843	1.71811	1.74435	1.931	1.72464	-1.00631	2.06711	1.85028	2.54167	1.77931	-1.39617	9
283209	PGM2L1	1.60389	1.60365	1.63219	1.64719	1.72615	1.71312	2.18063	3.86049	2.79843	4.79263	1.47732	9
284098	PIGW	1.52748	1.73416	1.78995	1.59319	-1.57309	-1.02352	1.68894	1.68408	1.92664	3.55347	-1.18421	9
11145	PLA2G16	-2.61159	2.39871	2.27669	-2.16413	1.96131	2.72474	-1.35635	1.02328	-2.48969	2.36935	1.65313	9
5424	POLD1	1.86682	1.85978	1.8675	2.66287	1.47942	1.72724	4.26388	1.64002	2.28034	3.3438	1.25696	9
5425	POLD2	1.53846	2.44124	2.48798	1.7131	1.26909	1.64699	1.51842	1.8796	2.55864	1.81689	-1.33792	9
5426	POLE	1.50215	1.51369	1.55364	2.20294	1.38141	1.58294	1.75009	2.18514	2.80849	2.73063	1.11552	9
8612	PPAP2C	1.6962	1.85756	1.78222	1.49147	1.3846	4.78624	7.491	5.534	4.88233	2.40187	3.31488	9
151742	PPM1L	-2.20062	-1.80707	-1.6057	-2.17493	-1.64073	-3.20914	1.5823	-1.23149	2.07201	-1.51869	-2.42096	9
5558	PRIM2	1.76466	1.86101	1.88359	3.16334	1.12574	1.53291	4.52439	2.30956	2.97152	3.17484	-1.14495	9
5577	PRKAR2B	-5.65442	-3.63873	-3.29928	-1.91454	-5.40721	-2.2615	-1.72127	-1.08193	-1.69768	-2.40105	-1.75345	9
29968	PSAT1	1.5079	7.38172	7.31179	2.06386	-6.19362	-3.62443	-1.57796	13.4769	27.9149	3.7878	1.30774	9
5959	RDH5	-21.4667	-4.55835	-4.53241	-1.76606	2.21895	3.31922	-1.88651	1.96114	-1.21683	-1.46696	13.5907	9
6173	RPL36A	1.26898	4.8066	5.12034	2.45469	2.47025	2.41299	5.28016	2.95539	3.80339	3.94265	-1.18038	9
23480	SEC61G	2.05919	1.53409	1.50127	3.44167	1.90825	1.75596	2.32531	2.15538	2.62927	3.0432	-1.23352	9
80031	SEMA6D	-3.28196	-7.14112	-7.88184	2.43481	-8.34656	-8.92124	-1.31507	-4.21763	-1.03833	-2.92874	-1.93195	9
6472	SHMT2	1.75067	2.79038	2.85515	2.1331	3.58714	1.43388	1.0735	3.00986	4.15168	2.43014	1.67813	9
6573	SLC19A1	2.03188	1.88076	1.77286	3.48396	1.23329	1.42814	1.84929	-1.74508	-1.95835	1.81124	-1.68963	9
6581	SLC22A3	-7.50062	4.42789	4.48141	1.03518	-4.08993	-3.25656	-1.8781	-1.70165	-4.99123	1.30555	-1.78475	9
10166	SLC25A15	1.6684	2.10512	2.05242	1.5753	-2.15882	-1.88733	-1.06946	2.07346	2.21529	1.45078	-3.2575	9
11001	SLC27A2	2.25643	-1.54662	-1.64422	-2.01876	-2.09155	-2.86056	-1.73367	2.00811	1.09865	1.89137	1.76463	9
6513	SLC2A1	2.6552	3.32872	3.34374	4.49573	3.60373	1.35022	3.90412	12.6414	53.9412	2.28178	1.37526	9
6611	SMS	2.04505	1.9117	1.93792	2.68807	-1.6244	-1.2274	1.89603	1.77374	2.79612	2.66042	-1.41028	9
6628	SNRPB	2.2454	2.17929	2.1876	2.22563	1.36809	1.78793	3.64281	1.82494	2.72173	2.45322	1.19049	9
6636	SNRPF	1.75916	2.22637	2.2492	1.91315	1.29187	1.81136	2.08955	1.81182	2.47986	2.66126	1.01011	9
6652	SORD	2.99641	3.15013	3.20769	1.14931	-4.79571	-5.66053	-1.36533	2.82642	4.66306	2.06925	-2.38879	9
6713	SQLE	4.57059	3.27774	3.65155	2.44417	-1.77717	-2.26511	4.98757	1.09842	1.92649	2.26729	-1.42413	9
6723	SRM	1.31427	2.29156	2.31632	1.76776	1.69475	1.68884	2.73015	2.23585	1.96374	2.16327	1.32305	9
6905	TBCE	1.85952	1.54138	1.56458	1.68598	1.09426	-1.0183	3.55372	1.76183	1.87061	2.04486	-1.53106	9
19	ABCA1	-2.63748	-1.70077	-1.69024	2.28322	2.71472	1.78767	-1.21749	-1.80439	-1.22435	1.90223	1.49283	8
9619	ABCG1	1.8268	-1.56745	-1.64439	2.2967	2.24448	1.47175	2.34946	-2.39759	-1.83628	1.32192	1.42252	8
34	ACADM	-1.65021	-2.11156	-2.1125	-2.10676	-3.03437	-2.78737	-1.5711	-1.00848	-1.2435	-1.36091	-1.61045	8
36	ACADSB	-1.02593	-1.59135	-1.52927	-2.39969	-4.19744	-4.51981	-2.18082	-1.25552	-1.64538	-1.39799	-1.70539	8
38	ACAT1	-1.86088	-2.29814	-2.29722	-1.99103	-2.58045	-2.01728	-1.75642	-1.33281	-1.82711	-1.30585	-1.41705	8
97	ACYP1	1.37956	1.95312	1.98879	2.33388	1.25118	1.79929	4.44573	1.5197	2.149	2.63586	-1.08131	8
109	ADCY3	-1.52517	2.33867	2.29977	2.18805	1.88181	-1.22613	2.19602	1.01686	1.5675	2.30342	1.06978	8
79814	AGMAT	2.48275	1.57222	1.52171	1.32849	-5.58184	-11.629	-1.26247	8.63283	6.51552	2.34588	-1.36038	8
375790	AGRN	1.45865	2.26494	2.3162	3.95333	1.09777	1.19857	3.22053	1.59228	1.60624	4.60002	1.9921	8
183	AGT	2.81912	4.39108	4.0306	-2.57817	2.011	1.28756	1.33354	7.14149	-1.22519	5.01398	2.27234	8
23382	AHCYL2	1.01716	-5.85984	-5.81825	-1.29282	-1.96065	-1.86455	1.59312	-1.12654	-5.17501	1.67042	-1.94532	8
221	ALDH3B1	1.31228	1.38555	1.41221	-2.29577	1.55762	2.07902	2.56017	-1.72746	-9.49393	1.63349	5.58852	8
230	ALDOC	-4.09817	1.60146	1.77972	2.05906	4.54927	-1.17163	1.27872	1.88262	3.39935	-1.90264	-1.33635	8
79053	ALG8	1.83004	1.76281	1.73967	1.71268	-1.04853	1.10204	1.96007	2.0622	1.71722	2.90528	1.00819	8
280	AMY2B	-2.47184	1.5182	1.36146	-9.23003	3.36863	2.0091	2.44713	1.50114	-1.98427	2.13972	1.17933	8
8639	AOC3	-15.8555	-4.7289	-4.4245	-2.40441	-1.30591	-5.79174	1.0108	-5.67937	-12.0301	-2.64787	-1.13277	8
344	APOC2	2.66614	3.96956	3.59521	4.92243	4.3213	3.22593	1.3485	-2.22852	-3.12846	1.96552	1.98403	8
79369	B3GNT4	3.4559	2.97101	3.11431	4.88496	3.23128	-2.10238	11.295	10.8427	15.4714	4.03747	2.27152	8
374907	B3GNT8	1.29884	-2.7542	-2.94654	-1.54116	-2.86767	-2.1025	2.00036	-1.35398	-2.28678	-2.11587	4.35908	8
146712	B3GNTL1	1.61426	3.22454	3.20317	1.38183	2.35553	3.45256	4.80373	2.58942	1.48867	3.05835	1.17019	8
9331	B4GALT6	-2.3943	1.51078	1.7354	-1.06066	-1.83272	-1.41463	2.37735	1.3493	2.42846	1.80667	2.53795	8
56898	BDH2	-1.84806	-1.60036	-1.64854	-1.30013	-2.11454	-1.70813	-1.6725	-1.51559	-2.31803	-1.4364	1.02204	8
790	CAD	1.2312	2.86931	2.85502	2.21035	1.13048	1.51828	4.45361	2.36467	3.15269	3.36381	1.00579	8
847	CAT	-4.1796	-1.74677	-1.77413	-1.29128	-2.64591	-3.08266	-1.74838	-3.54644	-4.17802	-1.18469	-1.1489	8
10576	CCT2	1.62667	2.00936	2.07933	2.04243	-1.21348	1.13457	2.23752	2.06723	2.36145	3.02147	-1.09387	8
7203	CCT3	2.09793	2.11531	2.12059	1.78889	-1.20199	1.06075	3.4676	2.7143	2.69833	2.20175	1.09522	8
22948	CCT5	1.76479	1.86331	1.8648	2.32831	-1.02451	1.23324	2.64969	2.59186	3.59328	2.72655	-1.13782	8
908	CCT6A	1.67386	2.47783	2.47611	2.3079	-1.08963	1.2408	2.87086	2.34983	3.24275	2.9913	1.07869	8
960	CD44	1.21854	2.61353	2.71489	2.08677	2.35057	2.4649	2.55477	-1.92222	1.06028	1.80941	2.24989	8
1036	CDO1	-12.8397	-2.91656	-2.5071	-2.43353	-3.6987	-1.25103	-1.28711	-6.13171	-7.76709	-2.26924	1.1202	8
54480	CHPF2	1.66761	1.28226	1.26441	2.23341	1.46833	1.734	2.03152	2.18347	1.59418	1.77641	1.50224	8
51363	CHST15	1.52337	-1.84542	-1.67449	2.78148	2.88053	1.21506	1.6041	2.09827	1.20214	-1.63596	1.31244	8
8534	CHST1	3.64951	2.15905	2.08558	2.98421	2.60131	-2.56234	4.80504	1.39743	1.06129	4.07537	-1.26491	8
1207	CLNS1A	1.66348	1.77081	1.76137	1.70037	1.07366	1.13364	1.65028	1.73712	2.34633	2.11442	-1.02947	8
1375	CPT1B	-1.12562	1.73253	1.66041	-2.87387	1.42333	1.42342	2.99329	3.21346	3.28678	1.76661	1.56885	8
28960	DCPS	1.32699	1.62472	1.72311	1.53545	-1.33947	-1.82917	1.54594	1.70464	1.52987	1.60873	-1.00519	8
1717	DHCR7	2.00436	2.44357	2.57905	2.59798	-1.81538	-1.40151	1.58569	1.21779	2.34952	2.38243	1.43528	8
1786	DNMT1	1.89234	2.09125	2.13618	2.63114	1.17323	1.08501	4.05123	1.98202	2.38746	3.36005	1.33138	8
8663	EIF3C	1.61195	1.79341	1.83032	1.89479	-1.12452	-1.27088	2.53578	2.49501	2.94608	2.7086	1.21052	8
2027	ENO3	-18.2901	2.12265	2.06772	-24.0853	1.16742	2.09819	-2.37496	9.81477	2.09309	1.84078	1.86338	8
58478	ENOPH1	1.5986	1.9875	2.072	1.53614	-1.17295	-1.21318	2.17931	1.53986	1.81321	2.29843	1.28626	8
5168	ENPP2	-6.4994	-2.2905	-2.32848	1.1173	2.88874	-2.11468	2.1539	-2.32241	-4.62275	-1.06075	1.17898	8
954	ENTPD2	1.19157	1.81773	1.73138	1.40028	2.24366	2.9559	5.88887	5.2673	5.80744	2.29181	9.68367	8
54512	EXOSC4	2.5781	2.15202	2.1082	2.19596	-1.07846	-1.06521	2.94091	2.21897	2.77952	1.91005	1.22397	8
9415	FADS2	2.69064	3.41795	3.68314	-2.37189	1.69099	-1.34144	2.09208	1.36371	1.67488	2.50481	-1.07978	8
80308	FLAD1	2.19742	1.57743	1.56396	1.84431	1.01034	1.1249	3.13714	2.85756	3.00787	2.1187	1.28721	8
2539	G6PD	1.362	1.62794	1.59817	2.09646	1.05307	2.65367	11.2666	2.68467	3.48556	1.67352	1.03358	8
2571	GAD1	13.7731	64.5363	79.9557	7.46722	-2.02991	-6.36986	63.4801	18.3129	27.0773	41.2645	1.87857	8
11226	GALNT6	2.775	4.47864	4.26114	3.25806	-2.70083	-2.21861	1.66208	3.84403	2.25307	1.04925	1.18932	8
2597	GAPDH	1.93751	1.61443	1.663	1.42837	2.55987	2.03043	2.43107	3.57059	5.82786	1.43984	1.45893	8
23464	GCAT	1.94161	1.67102	1.75076	-1.02538	-2.39875	-1.67043	1.12161	2.35009	3.19291	1.40252	-1.52465	8
79833	GEMIN6	1.69541	1.92812	1.94728	1.97022	1.19487	1.40119	2.2841	2.14638	2.14397	1.83842	-1.0195	8
2717	GLA	1.58085	2.11495	2.08036	2.28713	1.09306	1.59892	3.48887	1.24175	1.55296	2.20041	-1.28848	8
27165	GLS2	1.24262	10.8966	11.9912	1.36386	-2.40625	1.4203	-2.72606	1.82796	2.074	2.93453	3.52794	8
8833	GMPS	1.63253	2.12431	2.1832	2.70133	1.01662	1.01602	2.58374	1.94285	4.0942	2.57856	-1.01144	8
2770	GNAI1	-5.86294	-2.41896	-2.32674	2.22945	-2.56839	-1.33331	2.12311	-1.2359	1.44194	-1.64689	-1.92911	8
84706	GPT2	-1.6848	3.33829	3.2363	-2.45094	-2.38864	-2.42278	-1.18666	11.5366	7.28235	-1.01253	-1.1972	8
2877	GPX2	-1.58194	2.20236	2.13024	2.07904	-3.19055	4.84301	2.46414	69.2829	126.569	1.75039	12.637	8
29841	GRHL1	-1.35475	7.14425	6.90029	-1.75326	-3.09498	1.41504	1.29915	3.22034	7.3651	-2.50118	1.76829	8
119391	GSTO2	1.28383	1.73935	1.78465	1.13295	-3.64289	-1.54171	3.34854	1.73731	2.22806	2.07615	1.03421	8
3101	HK3	1.45371	1.56465	1.5041	4.7167	6.76301	4.94631	-1.62023	-3.10066	-4.52368	4.14795	1.91481	8
3162	HMOX1	-1.04772	-2.80224	-3.0472	1.1865	4.77235	2.79623	-1.63149	-2.5902	-2.1727	-1.16332	1.87393	8
90161	HS6ST2	-1.02532	12.5851	13.8366	1.83907	-86.0797	-18.574	23.2623	13.993	8.62195	-1.31201	11.3537	8
11185	INMT	-5.93189	-1.3711	-1.41056	-3.30373	-1.43059	-3.40116	-3.67641	-10.5679	-28.2013	-1.98775	3.23351	8
27124	INPP5J	1.55234	-1.83788	-2.11539	-1.82467	-4.46275	-10.7496	10.0695	-1.03331	-1.172	-1.53337	-1.3741	8
51477	ISYNA1	1.85373	1.83425	1.92344	2.11036	-1.65414	-1.57495	3.60691	2.50297	2.39661	3.10242	2.76356	8
3767	KCNJ11	2.25812	2.8409	2.87754	-3.71627	-2.0463	1.57583	5.67847	1.81325	1.18194	3.02847	1.48049	8
3801	KIFC3	-1.33393	2.49629	2.62854	2.24911	-1.57694	-1.71819	2.03904	1.1524	-1.53188	1.9046	1.09628	8
3930	LBR	-1.09163	1.57381	1.61832	1.73394	-1.13334	1.4853	2.28256	1.56093	1.78225	1.59258	-1.63971	8
54947	LPCAT2	-2.4836	2.05389	1.98266	2.04946	-2.0905	-1.9928	2.90573	-1.18253	1.20439	1.82789	-1.49077	8
64900	LPIN3	-1.23961	1.64708	1.53666	1.48061	2.6329	2.12081	2.18844	1.80643	2.25402	1.90134	-1.32645	8
4023	LPL	-27.0197	1.23458	1.24712	-3.64438	-2.45458	-6.98724	8.78222	-4.18637	-13.5554	1.00273	6.19701	8
10434	LYPLA1	2.00882	1.66147	1.70645	1.4166	-1.82082	-1.35264	1.61284	1.98242	2.17577	2.18179	-1.19547	8
4121	MAN1A1	-1.63776	-2.25396	-2.39985	1.26912	-3.27597	-4.01515	-1.41754	-1.61591	-2.47597	1.30368	-2.52264	8
4128	MAOA	-10.6691	-3.64186	-3.60597	-1.20774	-1.86911	-1.55992	1.00602	-1.69742	-2.34031	-2.12476	1.00115	8
4129	MAOB	-1.77233	-3.89554	-3.80754	-2.20838	1.32139	-1.52721	-1.21737	-2.69841	-4.11144	-2.52931	-1.51913	8
4141	MARS	1.54231	1.80017	1.80617	1.60377	-1.19387	1.1013	2.53083	1.9199	2.06567	1.67617	1.0721	8
4199	ME1	-3.27151	2.0935	2.44653	-1.02578	1.03952	1.44913	3.20166	1.562	3.95094	-1.60616	-1.63589	8
51085	MLXIPL	-12.5206	8.39234	7.49409	-3.21134	1.6972	1.79695	1.74518	-1.18793	1.22427	3.93202	3.59204	8
56667	MUC13	8.62778	-1.53468	-1.5646	-12.9511	-6.28402	-6.75212	58.7413	69.5967	7.15421	1.78546	1.42822	8
162417	NAGS	1.60097	-1.61497	-1.77436	3.79874	-2.02619	-3.98598	1.55679	1.17779	-1.51016	-1.32155	-1.1748	8
4831	NME2	1.55895	1.85701	1.87108	1.65813	1.29155	2.32474	2.87587	2.41082	2.80823	2.64528	1.30288	8
4833	NME4	1.81749	1.31968	1.41447	1.82974	1.57785	1.51871	1.52582	2.86062	2.32354	-1.66682	1.00397	8
4837	NNMT	-1.55815	2.06448	2.12018	-1.29532	13.581	7.82435	-3.39187	-1.01407	-2.85069	2.27759	-1.16987	8
10528	NOP56	1.54879	2.9387	2.96447	1.9521	1.32745	1.39283	2.98257	1.89762	2.72944	2.99346	-1.06761	8
4881	NPR1	-12.7037	-3.25995	-3.17442	-1.58104	-1.78845	-1.30638	1.09484	-5.82743	-14.8077	-2.52293	-1.31106	8
11164	NUDT5	1.77849	1.93633	1.94475	1.96487	-1.00385	1.33415	1.9425	1.86882	1.80147	2.3707	1.12516	8
23636	NUP62	1.56526	1.58898	1.60567	1.95645	1.49741	1.15836	2.39192	1.61032	1.97249	2.15336	1.07173	8
79902	NUP85	1.49865	1.82399	1.84717	2.15548	1.45612	1.71537	2.26782	1.97492	2.0997	2.29497	1.05429	8
4953	ODC1	-1.11781	1.98665	2.15085	4.98885	-1.73676	1.61849	1.87039	2.48317	2.55549	2.18848	1.20467	8
5033	P4HA1	1.8797	1.98282	2.02308	3.53858	3.01719	1.26648	1.08273	1.98903	2.27871	3.24126	1.22391	8
283208	P4HA3	6.49912	5.91316	6.18731	6.88061	7.02631	2.15796	1.14089	6.40191	2.14397	8.24428	-1.46596	8
5153	PDE1B	-3.70157	-2.12221	-2.06339	-1.54129	2.97322	1.57096	1.06482	-2.90843	-4.79474	-2.29154	1.23624	8
8654	PDE5A	-1.93578	-3.4388	-2.90146	-1.14709	-1.04699	-1.99787	3.10951	-3.47432	-4.05361	-2.08122	5.21704	8
5152	PDE9A	-2.202	-5.33057	-5.34259	-1.13662	-1.34656	-1.75293	2.25645	1.67359	1.01741	-1.83211	3.02689	8
5166	PDK4	-12.0004	-8.12131	-8.02511	-12.7006	1.45544	-5.19065	-1.42214	-5.22795	-14.3623	-5.25671	1.21617	8
5202	PFDN2	2.10921	2.24867	2.25066	2.20198	1.04376	1.29575	2.32885	2.07302	2.38865	2.12202	1.38221	8
9487	PIGL	-1.33168	1.88018	1.84928	2.37695	2.25024	2.44148	2.40801	1.82306	1.39568	1.82118	1.18858	8
128869	PIGU	1.80801	2.03559	1.93492	1.66578	-1.16038	1.18944	3.42957	1.88839	2.06314	2.63725	1.15559	8
23533	PIK3R5	1.14289	-1.79759	-1.8249	1.72578	6.91674	4.37691	-1.0443	-2.21284	-3.55482	1.80126	-1.2462	8
146850	PIK3R6	1.60589	-1.49982	-1.58887	1.85815	12.8002	5.40638	3.1067	1.39906	-1.82959	1.9202	1.66816	8
8395	PIP5K1B	-2.15689	-1.97033	-2.02878	-2.05036	-3.71797	-1.87354	3.87496	-4.92141	-6.17189	1.63237	1.17578	8
255189	PLA2G4F	2.80561	-1.51891	-1.60601	-1.19249	-6.88525	-8.1503	28.8492	-5.75689	-5.56593	-1.17718	-2.42306	8
5329	PLAUR	3.2247	1.51825	1.64003	2.70823	2.63281	2.26429	1.181	1.26057	-1.43673	2.65942	2.98122	8
51196	PLCE1	-1.4108	-4.05679	-4.12343	-1.60485	-2.31853	-3.01179	8.01652	-2.7866	-3.0068	1.09497	1.18755	8
23649	POLA2	1.82836	1.8739	1.9136	2.61436	1.06277	1.05532	4.11651	1.88823	2.53521	2.25093	1.09922	8
51728	POLR3K	2.74327	1.91731	1.95373	1.84469	-1.14171	1.28842	2.22212	1.76588	1.83719	2.14111	-1.03325	8
8613	PPAP2B	-4.08287	-2.51033	-2.56702	-1.87188	1.22417	-2.53964	-1.97422	-2.46795	-2.90588	-1.30439	-1.04734	8
5471	PPAT	1.75185	3.54613	3.63323	2.30715	-1.05551	-1.1513	2.13701	4.28519	5.10718	4.03368	-1.1179	8
5557	PRIM1	1.60556	1.97558	2.05128	2.58485	1.39403	1.27528	4.67181	2.14951	2.81886	3.18438	-1.07159	8
5563	PRKAA2	1.07829	-3.69668	-3.64457	-5.31041	-1.78417	-2.39696	6.03543	2.34316	1.53979	-3.06546	-1.64909	8
5634	PRPS2	1.59668	1.68963	1.70338	1.57516	-2.2091	-2.08814	1.46154	1.90224	2.38356	1.44332	-1.07274	8
10213	PSMD14	1.69129	1.93941	1.99337	1.84051	-1.06548	1.24289	2.3435	1.88985	2.43457	2.3152	1.02786	8
5723	PSPH	2.06819	3.03142	3.06856	2.57044	-1.10944	1.33615	4.87578	2.60584	5.28251	2.37364	-1.33414	8
9536	PTGES	1.42771	2.13905	2.05002	1.61359	-2.13576	1.26876	12.1736	8.76711	5.21886	2.03557	1.13453	8
5740	PTGIS	-4.13015	-2.14775	-2.08287	-2.8996	-1.36723	-2.33151	-1.69184	-2.21081	-4.34932	-1.56801	-1.85396	8
65263	PYCRL	3.23081	3.00292	3.0062	2.52728	-1.12128	1.18372	3.09568	2.81072	2.99491	2.99706	-1.14882	8
23475	QPRT	2.56157	1.9441	1.93748	2.38058	-2.56287	-1.62162	1.16781	3.23253	-1.11837	2.25275	1.64045	8
8480	RAE1	1.84531	2.84113	2.75545	1.93855	-1.14498	1.11929	2.35367	1.82688	2.99864	2.6511	-1.04316	8
11069	RAPGEF4	-1.23896	1.92904	1.84548	1.66438	1.82999	-5.9236	-1.08535	-3.85682	-3.16048	1.78257	1.51412	8
10921	RNPS1	1.66846	1.7144	1.71206	1.81342	1.07676	1.33474	2.04968	1.59797	1.80405	1.85257	1.07334	8
51121	RPL26L1	1.93687	1.63767	1.67089	1.75446	1.11738	1.35893	1.99536	1.58896	1.70162	1.96112	-1.03959	8
6167	RPL37	-1.12695	1.70311	1.67633	1.43532	1.91594	1.7634	2.27838	1.9427	2.03534	1.52132	1.0677	8
6170	RPL39	-1.1498	1.92693	1.91094	1.54446	1.46307	1.96584	2.54817	1.64051	1.65587	1.58212	1.05962	8
6185	RPN2	1.66155	2.17756	2.14065	1.89702	1.00598	1.04142	2.19135	1.80111	1.78609	2.39574	1.02202	8
6223	RPS19	1.05239	1.86016	1.84006	1.26184	2.44867	2.41753	2.75707	1.60831	1.99613	1.6428	1.22598	8
6227	RPS21	1.16342	2.30155	2.27347	1.32868	1.72204	1.63494	2.8758	1.57855	1.63561	1.73405	-1.10141	8
6385	SDC4	1.09333	1.77549	1.6864	1.54983	-1.65927	1.16876	-1.55701	-1.4591	-2.49451	2.16789	4.7779	8
9123	SLC16A3	4.80361	1.20262	1.20068	2.34201	7.79674	4.39414	5.48931	2.80287	1.8185	2.48596	1.40383	8
788	SLC25A20	-1.72649	-2.81866	-2.98512	-1.60878	-1.84397	-1.64973	-1.2992	-1.35141	-2.24218	-1.50091	-1.32658	8
291	SLC25A4	-1.5887	-1.92232	-1.72162	-7.17785	-2.44514	-2.16474	1.22821	-1.29506	-1.64149	-2.76156	-1.11694	8
6518	SLC2A5	-1.22386	-2.82639	-2.8854	-1.49823	3.1928	-2.98786	45.2991	7.0283	4.37473	-7.11608	-1.32716	8
80736	SLC44A4	5.45789	-2.58873	-2.65548	-5.54744	-4.08547	1.73224	4.08254	1.71136	-4.18541	1.31559	1.01216	8
6604	SMARCD3	-1.35746	-2.01094	-1.88164	-2.46863	-1.36506	2.02338	4.60718	-1.12724	-1.59603	-1.67859	1.63901	8
54498	SMOX	1.4146	5.19231	5.35631	2.40334	2.01169	1.66381	2.77036	3.0659	3.9671	1.42812	1.49011	8
6632	SNRPD1	1.74652	1.79807	1.91709	2.00661	1.15065	1.22061	2.66131	1.88899	2.79466	3.43814	1.0175	8
6635	SNRPE	2.09763	2.07801	2.10596	1.91983	1.17929	1.2069	3.40889	2.2799	2.67378	2.32944	-1.06144	8
6637	SNRPG	1.84046	1.74213	1.80334	1.92792	-1.03326	1.28213	1.97661	1.857	2.67551	2.62883	-1.03224	8
58477	SRPRB	1.61529	1.85763	1.88462	1.51873	-1.13665	1.25314	1.9417	2.03795	2.64453	1.91649	-1.36144	8
6804	STX1A	2.82591	3.59967	3.92922	4.43161	1.40259	2.12036	5.82516	9.85959	4.37546	2.2501	1.00614	8
6820	SULT2B1	1.78983	9.17511	7.98944	-2.28803	-14.7074	-4.74374	9.27262	-1.40857	-1.10887	-2.64304	3.45251	8
6901	TAZ	1.16413	1.98228	1.9594	1.70165	1.76	1.704	3.1205	1.51601	1.42937	1.87183	1.17593	8
7004	TEAD4	2.06855	5.18017	5.14363	1.67515	1.56301	1.45095	3.09375	-1.28737	1.22486	4.31159	-2.05085	8
96764	TGS1	1.12501	2.32922	2.3045	1.97205	-1.63743	-1.62725	2.13622	1.29702	1.68188	2.524	-1.34999	8
26519	TIMM10	1.56721	1.53095	1.54577	1.50547	1.14131	1.01843	1.76736	1.75475	2.01665	1.71105	1.09614	8
10452	TOMM40	2.13617	1.803	1.83209	1.86289	1.18625	1.25401	2.9137	1.87163	2.68877	2.88305	1.06127	8
7264	TSTA3	3.20609	2.21262	2.25858	1.23527	1.02234	1.43419	2.33026	2.74397	1.93918	1.61727	1.81493	8
7846	TUBA1A	-1.14937	-1.91502	-1.77233	1.18433	1.826	2.29239	2.42859	-1.83835	-1.85991	-1.74502	1.63797	8
84790	TUBA1C	2.91235	1.46665	1.48585	1.75805	1.50929	1.83847	2.6122	2.31902	3.74521	1.70294	1.07562	8
7280	TUBB2A	-1.56519	-1.84138	-1.66679	1.00974	-2.41218	-1.22131	1.9635	3.08759	2.49527	-1.12239	-1.54524	8
84617	TUBB6	-2.26689	-2.08784	-1.97642	1.42798	1.86727	1.60287	1.56046	-2.18339	-1.10794	-2.04232	1.26889	8
7991	TUSC3	-1.1063	-2.48826	-2.17209	1.99151	-1.49777	1.91089	2.59653	1.50094	2.34417	-1.01206	8.16088	8
1890	TYMP	3.39921	1.22444	1.17211	3.4916	6.89895	4.56071	2.09589	1.64492	1.6052	3.04658	-1.17255	8
7358	UGDH	1.7781	-3.14916	-3.1854	1.74096	-1.13233	-1.05005	1.8413	3.92265	2.97267	1.5112	-1.12689	8
10090	UST	-2.39976	-2.69744	-2.16549	1.79096	-2.79166	-2.13986	2.80854	-2.12028	1.33104	-1.34732	-1.79711	8
7498	XDH	-2.19986	-4.61377	-4.69573	1.06558	3.36053	10.0103	-1.67282	22.6833	16.2292	-2.90916	5.4446	8
7538	ZFP36	-4.59758	-1.32439	-1.2539	-2.20412	1.11053	-2.20763	-2.79314	-3.42022	-5.25579	-2.43655	-2.04743	8
