# Supplementary material for: Integrative Analysis Reveals Comprehensive Altered Metabolic Genes Linking with Tumor Epigenetics Modification in Pan-Cancer
Source: Biomed Res Int. 2019 Nov 7;2019:6706354. doi: 10.1155/2019/6706354 (PMC6881592; doi:10.1155/2019/6706354)
Supplement: Supplementary Materials — Supplementary Table 1: the number of sample information and differential expression genes for 11 different cancer types and 5 GEO data projects. Supplementary Table 2: the differential expression gene list and its fold change in 11 cancer types compared with normal samples. Supplementary Table 3: the metabolic genes and the differential expression of metabolic genes. Supplementary Table 4: the function annotations of MDEGs. Supplementary Table 5: the critical different expression genes related to epigenetic modification in the specific types of cancer. Supplementary Table 6: the genes with different expression and methylation influenced by DNMT3B expression. Supplementary Table 7: gene ontology analysis of differential expression and methylation genes. Supplementary Table 8: the correlation between expression and methylation of specific genes. Supplementary Table 9: the oncogene/tumor suppressor mutation frequency and the sample size with mutation across cancer types. Supplementary Table 10: the differential expression MDEGs in mutated samples compared with non-mutated samples across cancer types. Supplementary Table 11: the pathway enrichment analysis in each mutation group. Supplementary Figure 1: relationships among metabolic pathways, cancer types, and oncogene/suppressor gene mutations. [file 6706354.f1.zip › 6706354.f1/Supplementary Table4.xlsx]

## Sheet: Table 4-1
Table 4-1 The GO annotations of MDEGs which is in at lest 8 cancer types.
Category	Term	Count	%	PValue	Genes	List Total	Pop Hits	Pop Total	Fold Enrichment	Bonferroni	Benjamini	FDR
GOTERM_BP_DIRECT	GO:0055114~oxidation-reduction process	38	14.5594	3.74356e-13	XDH, ME1, PYCRL, SORD, LDHD, UGDH, IL4I1, MTHFD1L, GPX2, AKR1C3, GPD1L, AKR1C2, MTHFD2, PTGIS, P4HA1, DHCR7, P4HA3, GPX3, SMOX, GSTO2, TSTA3, LBR, IMPDH1, AKR1C1, ALDH6A1, ACADM, MAOA, MAOB, FADS2, CDO1, ALDH3B1, RDH5, PYCR1, G6PD, SQLE, RRM2, AOX1, AOC3	260	592	16792	4.14563	5.69413e-10	5.69413e-10	6.23068e-10
GOTERM_BP_DIRECT	GO:0000387~spliceosomal snRNP assembly	8	3.06513	1.71938e-07	CLNS1A, SNRPB, SNRPD1, GEMIN6, TGS1, SNRPF, SNRPE, SNRPG	260	28	16792	18.4527	0.000261484	0.000130751	0.000286162
GOTERM_BP_DIRECT	GO:0006730~one-carbon metabolic process	8	3.06513	2.87936e-07	MTHFD2, SHMT2, AHCY, CA12, CA4, CA2, AHCYL2, MTHFD1L	260	30	16792	17.2226	0.000437855	0.000145973	0.00047922
GOTERM_BP_DIRECT	GO:0061621~canonical glycolysis	7	2.68199	2.25788e-06	PFKFB4, ALDOC, HK3, HK2, ENO3, PGK1, GAPDH	260	26	16792	17.3882	0.00342835	0.000858192	0.0037578
GOTERM_BP_DIRECT	GO:0051170~nuclear import	6	2.29885	6.10598e-06	SNRPB, SNRPD1, GEMIN6, SNRPF, SNRPE, SNRPG	260	18	16792	21.5282	0.00924423	0.00185572	0.0101619
GOTERM_BP_DIRECT	GO:0000722~telomere maintenance via recombination	7	2.68199	8.22341e-06	PRIM1, POLE2, POLD1, POLE, POLD2, PRIM2, POLA2	260	32	16792	14.1279	0.01243	0.00208247	0.0136856
GOTERM_BP_DIRECT	GO:0006228~UTP biosynthetic process	5	1.91571	2.48334e-05	NME4, NME2, NME1-NME2, NME1, CAD	260	12	16792	26.9103	0.0370676	0.00538147	0.0413229
GOTERM_BP_DIRECT	GO:0030206~chondroitin sulfate biosynthetic process	6	2.29885	3.46609e-05	CHPF, CSPG4, VCAN, CHPF2, DCN, CHST15	260	25	16792	15.5003	0.0513546	0.00656835	0.0576716
GOTERM_BP_DIRECT	GO:0015949~nucleobase-containing small molecule interconversion	6	2.29885	3.46609e-05	NME4, NME2, NME1-NME2, NME1, RRM2, DTYMK	260	25	16792	15.5003	0.0513546	0.00656835	0.0576716
GOTERM_BP_DIRECT	GO:0006183~GTP biosynthetic process	5	1.91571	3.54362e-05	NME4, NME2, NME1-NME2, NME1, IMPDH1	260	13	16792	24.8402	0.0524725	0.00597092	0.0589611
GOTERM_BP_DIRECT	GO:0009168~purine ribonucleoside monophosphate biosynthetic process	5	1.91571	3.54362e-05	ATIC, GMPS, IMPDH1, ADA, PPAT	260	13	16792	24.8402	0.0524725	0.00597092	0.0589611
GOTERM_BP_DIRECT	GO:0008652~cellular amino acid biosynthetic process	6	2.29885	4.23759e-05	GLS2, PYCR1, PYCRL, GPT, ASNS, GPT2	260	26	16792	14.9041	0.0624218	0.00642479	0.0705042
GOTERM_BP_DIRECT	GO:0006635~fatty acid beta-oxidation	7	2.68199	5.4867e-05	ACAA2, CPT1B, ACADM, EHHADH, BDH2, ACAT1, SLC27A2	260	44	16792	10.2748	0.0800675	0.00755811	0.0912776
GOTERM_BP_DIRECT	GO:0019083~viral transcription	10	3.83142	5.92614e-05	RPL36A, RPS19, NUP62, RAE1, NUP210, RPL26L1, NUP85, RPL37, RPL39, RPS21	260	112	16792	5.76648	0.0861961	0.00748347	0.0985849
GOTERM_BP_DIRECT	GO:0008152~metabolic process	12	4.5977	6.07632e-05	ACAA2, PDE2A, LPCAT1, EHHADH, TAZ, EPHX2, PLA2G4F, ACSL4, FLAD1, LPCAT2, MAN1C1, ACAT1	260	168	16792	4.61319	0.0882811	0.00708429	0.101082
GOTERM_BP_DIRECT	GO:0006271~DNA strand elongation involved in DNA replication	5	1.91571	6.6024e-05	PRIM1, POLD1, POLD2, PRIM2, POLA2	260	15	16792	21.5282	0.0955478	0.0071476	0.109829
GOTERM_BP_DIRECT	GO:0046069~cGMP catabolic process	4	1.53257	0.000121264	PDE1B, PDE2A, PDE5A, PDE9A	260	7	16792	36.9055	0.168442	0.0122216	0.201632
GOTERM_BP_DIRECT	GO:0006096~glycolytic process	6	2.29885	0.000162083	ALDOC, HK3, HK2, ENO3, PGK1, GAPDH	260	34	16792	11.3973	0.218507	0.0152912	0.269418
GOTERM_BP_DIRECT	GO:0000082~G1/S transition of mitotic cell cycle	9	3.44828	0.000180669	PRIM1, TYMS, EIF4EBP1, POLE2, RRM2, POLE, PRIM2, POLA2, PPAT	260	102	16792	5.69864	0.240293	0.0160361	0.300268
GOTERM_BP_DIRECT	GO:1904871~positive regulation of protein localization to Cajal body	4	1.53257	0.00019181	CCT5, CCT2, CCT3, CCT6A	260	8	16792	32.2923	0.25306	0.0160788	0.318757
GOTERM_BP_DIRECT	GO:0007017~microtubule-based process	6	2.29885	0.000214147	TUBB2A, EHHADH, TUBB6, TUBA1A, TUBB3, TUBA1C	260	36	16792	10.7641	0.278016	0.0169987	0.355815
GOTERM_BP_DIRECT	GO:0042493~response to drug	15	5.74713	0.000277795	LPL, SORD, MAOB, ACACB, ABCA1, KCNJ11, ADA, ABCG2, TYMS, ENO3, CAT, RPN2, GAD1, DNMT3B, NNMT	260	304	16792	3.18674	0.344649	0.0209076	0.461339
GOTERM_BP_DIRECT	GO:0006695~cholesterol biosynthetic process	6	2.29885	0.000278052	ACAA2, G6PD, SQLE, DHCR7, PRKAA2, LBR	260	38	16792	10.1976	0.344906	0.0199402	0.461766
GOTERM_BP_DIRECT	GO:0006220~pyrimidine nucleotide metabolic process	4	1.53257	0.000284437	NME4, NME2, NME1-NME2, NME1	260	9	16792	28.7043	0.351238	0.0194756	0.472345
GOTERM_BP_DIRECT	GO:0006853~carnitine shuttle	4	1.53257	0.000284437	SLC25A20, CPT1B, PRKAA2, ACACB	260	9	16792	28.7043	0.351238	0.0194756	0.472345
GOTERM_BP_DIRECT	GO:0051289~protein homotetramerization	7	2.68199	0.000316751	SHMT2, GPX3, CAT, ACACB, HPRT1, PPAT, TK1	260	60	16792	7.53487	0.382363	0.0207323	0.525874
GOTERM_BP_DIRECT	GO:0001523~retinoid metabolic process	7	2.68199	0.000346826	AKR1C3, LPL, APOC2, AGRN, SDC4, AKR1C1, RDH5	260	61	16792	7.41135	0.409989	0.021744	0.57567
GOTERM_BP_DIRECT	GO:0046653~tetrahydrofolate metabolic process	4	1.53257	0.000401711	MTHFD2, TYMS, SHMT2, MTHFD1L	260	10	16792	25.8338	0.457261	0.0241487	0.666484
GOTERM_BP_DIRECT	GO:0006163~purine nucleotide metabolic process	4	1.53257	0.000401711	NME4, NME2, NME1-NME2, NME1	260	10	16792	25.8338	0.457261	0.0241487	0.666484
GOTERM_BP_DIRECT	GO:0007595~lactation	6	2.29885	0.000448171	XDH, CAV1, HK2, CAD, CDO1, PPAT	260	42	16792	9.22637	0.494304	0.025883	0.743295
GOTERM_BP_DIRECT	GO:0042632~cholesterol homeostasis	7	2.68199	0.000450632	LPL, CAV1, EPHX2, APOC2, ABCA1, AKR1C1, ABCG1	260	64	16792	7.06394	0.496195	0.0250717	0.747363
GOTERM_BP_DIRECT	GO:0006094~gluconeogenesis	6	2.29885	0.000557999	GPD1, ALDOC, ENO3, PGK1, GAPDH, PC	260	44	16792	8.80699	0.572137	0.0298647	0.924652
GOTERM_BP_DIRECT	GO:0019432~triglyceride biosynthetic process	5	1.91571	0.000632776	GPD1L, GPD1, LPL, LPCAT1, LPIN3	260	26	16792	12.4201	0.618161	0.0326535	1.04795
GOTERM_BP_DIRECT	GO:0008334~histone mRNA metabolic process	4	1.53257	0.000719814	SNRPB, SNRPF, SNRPE, SNRPG	260	12	16792	21.5282	0.665538	0.0358493	1.19129
GOTERM_BP_DIRECT	GO:0006241~CTP biosynthetic process	4	1.53257	0.000719814	NME4, NME2, NME1-NME2, NME1	260	12	16792	21.5282	0.665538	0.0358493	1.19129
GOTERM_BP_DIRECT	GO:0030208~dermatan sulfate biosynthetic process	4	1.53257	0.000719814	UST, CSPG4, VCAN, DCN	260	12	16792	21.5282	0.665538	0.0358493	1.19129
GOTERM_BP_DIRECT	GO:0018146~keratan sulfate biosynthetic process	5	1.91571	0.000845919	OGN, B3GNT4, B4GALT6, PRELP, CHST1	260	28	16792	11.533	0.723954	0.0406719	1.39861
GOTERM_BP_DIRECT	GO:0030203~glycosaminoglycan metabolic process	5	1.91571	0.000969479	CSPG4, VCAN, AGRN, DCN, SDC4	260	29	16792	11.1353	0.771288	0.0450563	1.60136
GOTERM_BP_DIRECT	GO:0009142~nucleoside triphosphate biosynthetic process	4	1.53257	0.00116407	NME4, NME2, NME1-NME2, NME1	260	14	16792	18.4527	0.829936	0.0522687	1.91985
GOTERM_BP_DIRECT	GO:0001516~prostaglandin biosynthetic process	4	1.53257	0.00116407	PTGIS, PTGES, PLA2G4F, MIF	260	14	16792	18.4527	0.829936	0.0522687	1.91985
GOTERM_BP_DIRECT	GO:0006564~L-serine biosynthetic process	3	1.14943	0.00139312	SHMT2, PSAT1, PSPH	260	4	16792	48.4385	0.880018	0.0604602	2.29352
GOTERM_BP_DIRECT	GO:0002762~negative regulation of myeloid leukocyte differentiation	3	1.14943	0.00139312	NME2, NME1-NME2, NME1	260	4	16792	48.4385	0.880018	0.0604602	2.29352
GOTERM_BP_DIRECT	GO:0071395~cellular response to jasmonic acid stimulus	3	1.14943	0.00139312	AKR1C3, AKR1C2, AKR1C1	260	4	16792	48.4385	0.880018	0.0604602	2.29352
GOTERM_BP_DIRECT	GO:0006270~DNA replication initiation	5	1.91571	0.00141562	PRIM1, POLE2, POLE, PRIM2, POLA2	260	32	16792	10.0913	0.884061	0.0597059	2.33016
GOTERM_BP_DIRECT	GO:1904874~positive regulation of telomerase RNA localization to Cajal body	4	1.53257	0.00143858	CCT5, CCT2, CCT3, CCT6A	260	15	16792	17.2226	0.888045	0.0590109	2.36752
GOTERM_BP_DIRECT	GO:0010827~regulation of glucose transport	5	1.91571	0.00159157	NUP62, RAE1, NUP210, TRIB3, NUP85	260	33	16792	9.78555	0.911319	0.063381	2.61618
GOTERM_BP_DIRECT	GO:0042594~response to starvation	5	1.91571	0.00198803	ZFP36, ACADM, PDK4, CAD, ACAT1	260	35	16792	9.22637	0.95153	0.0765632	3.25779
GOTERM_BP_DIRECT	GO:1901998~toxin transport	5	1.91571	0.00220977	CCT5, SLC22A3, CCT2, CCT3, ABCG1	260	36	16792	8.97009	0.96543	0.0826594	3.6149
GOTERM_BP_DIRECT	GO:0046655~folic acid metabolic process	4	1.53257	0.00249328	MTHFD2, SHMT2, SLC19A1, MTHFD1L	260	18	16792	14.3521	0.977562	0.0905592	4.0697
GOTERM_BP_DIRECT	GO:0009116~nucleoside metabolic process	4	1.53257	0.00292729	NME4, ATIC, PRPS2, PPAT	260	19	16792	13.5968	0.988425	0.103049	4.762
GOTERM_BP_DIRECT	GO:0006487~protein N-linked glycosylation	5	1.91571	0.00297622	TUSC3, FUT8, RPN2, ALG8, MAN1C1	260	39	16792	8.28008	0.989258	0.102321	4.83976
GOTERM_BP_DIRECT	GO:0006629~lipid metabolic process	9	3.44828	0.00305286	LPL, CD36, G6PD, PAFAH1B3, APOC2, FADS2, ACSL4, ALDH3B1, PC	260	157	16792	3.7023	0.990443	0.102508	4.96144
GOTERM_BP_DIRECT	GO:0006614~SRP-dependent cotranslational protein targeting to membrane	7	2.68199	0.00333664	RPL36A, RPS19, RPL26L1, RPL37, SRPRB, RPL39, RPS21	260	94	16792	4.80949	0.993802	0.10911	5.41068
GOTERM_BP_DIRECT	GO:0006541~glutamine metabolic process	4	1.53257	0.00340495	GLS2, CAD, ASNS, GMPS	260	20	16792	12.9169	0.994416	0.108887	5.51852
GOTERM_BP_DIRECT	GO:0006491~N-glycan processing	4	1.53257	0.00340495	MGAT4A, FUT8, MAN1A1, MAN1C1	260	20	16792	12.9169	0.994416	0.108887	5.51852
GOTERM_BP_DIRECT	GO:0006006~glucose metabolic process	6	2.29885	0.00372472	G6PD, SORD, PDK4, GAPDH, KCNJ11, PGM2L1	260	67	16792	5.7837	0.996572	0.11608	6.0218
GOTERM_BP_DIRECT	GO:0006595~polyamine metabolic process	3	1.14943	0.00472871	ODC1, SRM, SMS	260	7	16792	27.6791	0.99926	0.142207	7.58567
GOTERM_BP_DIRECT	GO:0071398~cellular response to fatty acid	4	1.53257	0.00511258	NME2, NME1-NME2, NME1, PDK4	260	23	16792	11.2321	0.999589	0.149916	8.1771
GOTERM_BP_DIRECT	GO:0033137~negative regulation of peptidyl-serine phosphorylation	4	1.53257	0.00511258	GPD1L, CAV1, INPP5J, MLXIPL	260	23	16792	11.2321	0.999589	0.149916	8.1771
GOTERM_BP_DIRECT	GO:0005975~carbohydrate metabolic process	9	3.44828	0.00565938	GPD1L, ME1, MGAT4A, SLC2A5, GLA, ALDH1B1, UGDH, B4GALT6, AMY2B	260	174	16792	3.34058	0.999822	0.161525	9.01344
GOTERM_BP_DIRECT	GO:0001889~liver development	6	2.29885	0.00569623	ACADM, GNPNAT1, CAD, ASNS, ACAT1, ADA	260	74	16792	5.23659	0.999832	0.159514	9.06954
GOTERM_BP_DIRECT	GO:0045471~response to ethanol	7	2.68199	0.0057358	TYMS, EIF4EBP1, PSMD14, G6PD, MAOB, CAT, CDO1	260	105	16792	4.30564	0.999841	0.157645	9.12974
GOTERM_BP_DIRECT	GO:0031100~organ regeneration	5	1.91571	0.0058636	ATIC, CAD, PRPS2, PPAT, NNMT	260	47	16792	6.8707	0.99987	0.158033	9.32395
GOTERM_BP_DIRECT	GO:0097011~cellular response to granulocyte macrophage colony-stimulating factor stimulus	3	1.14943	0.00624101	ZFP36, PDE1B, PDE2A	260	8	16792	24.2192	0.999927	0.164451	9.89519
GOTERM_BP_DIRECT	GO:0044597~daunorubicin metabolic process	3	1.14943	0.00624101	AKR1C3, AKR1C2, AKR1C1	260	8	16792	24.2192	0.999927	0.164451	9.89519
GOTERM_BP_DIRECT	GO:0044598~doxorubicin metabolic process	3	1.14943	0.00624101	AKR1C3, AKR1C2, AKR1C1	260	8	16792	24.2192	0.999927	0.164451	9.89519
GOTERM_BP_DIRECT	GO:0019934~cGMP-mediated signaling	3	1.14943	0.00624101	CD36, PDE2A, PDE9A	260	8	16792	24.2192	0.999927	0.164451	9.89519
GOTERM_BP_DIRECT	GO:0006457~protein folding	9	3.44828	0.00690517	PFDN2, CCT5, PFDN6, GNAI1, SPHK1, TBCE, CCT2, CCT3, CCT6A	260	180	16792	3.22923	0.999974	0.177305	10.8922
GOTERM_BP_DIRECT	GO:0071897~DNA biosynthetic process	4	1.53257	0.00725513	TYMS, PRIM2, POLA2, TK1	260	26	16792	9.93609	0.999985	0.182389	11.4134
GOTERM_BP_DIRECT	GO:0000245~spliceosomal complex assembly	4	1.53257	0.00725513	SNRPD1, GEMIN6, SNRPE, SNRPG	260	26	16792	9.93609	0.999985	0.182389	11.4134
GOTERM_BP_DIRECT	GO:0042448~progesterone metabolic process	3	1.14943	0.00794289	AKR1C3, AKR1C2, AKR1C1	260	9	16792	21.5282	0.999995	0.194745	12.4293
GOTERM_BP_DIRECT	GO:1904851~positive regulation of establishment of protein localization to telomere	3	1.14943	0.00794289	CCT5, CCT2, CCT6A	260	9	16792	21.5282	0.999995	0.194745	12.4293
GOTERM_BP_DIRECT	GO:0036151~phosphatidylcholine acyl-chain remodeling	4	1.53257	0.00807028	PLA2G16, LPCAT1, PLA2G4F, LPCAT2	260	27	16792	9.56809	0.999996	0.194444	12.6163
GOTERM_BP_DIRECT	GO:0050731~positive regulation of peptidyl-tyrosine phosphorylation	6	2.29885	0.0087398	CD36, CD44, ENPP2, AGT, CSPG4, MIF	260	82	16792	4.7257	0.999998	0.205626	13.5927
GOTERM_BP_DIRECT	GO:0006644~phospholipid metabolic process	5	1.91571	0.00956255	LPL, PLA2G16, PLCE1, TAZ, PLA2G4F	260	54	16792	5.98006	1	0.21941	14.7787
GOTERM_BP_DIRECT	GO:0019371~cyclooxygenase pathway	3	1.14943	0.00982819	AKR1C3, PTGIS, PTGES	260	10	16792	19.3754	1	0.221493	15.1583
GOTERM_BP_DIRECT	GO:0051156~glucose 6-phosphate metabolic process	3	1.14943	0.00982819	G6PD, HK3, HK2	260	10	16792	19.3754	1	0.221493	15.1583
GOTERM_BP_DIRECT	GO:0035999~tetrahydrofolate interconversion	3	1.14943	0.00982819	TYMS, SHMT2, MTHFD1L	260	10	16792	19.3754	1	0.221493	15.1583
GOTERM_BP_DIRECT	GO:0009636~response to toxic substance	6	2.29885	0.010125	TYMS, MAOB, EPHX2, ASNS, DNMT3B, INMT	260	85	16792	4.55891	1	0.224113	15.5806
GOTERM_BP_DIRECT	GO:0000184~nuclear-transcribed mRNA catabolic process, nonsense-mediated decay	7	2.68199	0.0103617	RPL36A, RPS19, RPL26L1, RPL37, RNPS1, RPL39, RPS21	260	119	16792	3.7991	1	0.225487	15.9158
GOTERM_BP_DIRECT	GO:2000379~positive regulation of reactive oxygen species metabolic process	4	1.53257	0.0108289	AKR1C3, XDH, CD36, AGT	260	30	16792	8.61128	1	0.231156	16.5742
GOTERM_BP_DIRECT	GO:0033574~response to testosterone	4	1.53257	0.0108289	NME1, CAD, PSPH, KCNJ11	260	30	16792	8.61128	1	0.231156	16.5742
GOTERM_BP_DIRECT	GO:0006409~tRNA export from nucleus	4	1.53257	0.0129348	NUP62, RAE1, NUP210, NUP85	260	32	16792	8.07308	1	0.266119	19.4814
GOTERM_BP_DIRECT	GO:0032212~positive regulation of telomere maintenance via telomerase	4	1.53257	0.0129348	CCT5, CCT2, CCT3, CCT6A	260	32	16792	8.07308	1	0.266119	19.4814
GOTERM_BP_DIRECT	GO:0002931~response to ischemia	4	1.53257	0.0140691	EIF4EBP1, CAV1, HK2, KCNJ11	260	33	16792	7.82844	1	0.282193	21.0076
GOTERM_BP_DIRECT	GO:0015758~glucose transport	4	1.53257	0.0140691	SLC2A5, HK3, SLC2A1, HK2	260	33	16792	7.82844	1	0.282193	21.0076
GOTERM_BP_DIRECT	GO:0000050~urea cycle	3	1.14943	0.0141251	NAGS, CAD, SLC25A15	260	12	16792	16.1462	1	0.279522	21.0823
GOTERM_BP_DIRECT	GO:0006164~purine nucleotide biosynthetic process	3	1.14943	0.0141251	ATIC, HPRT1, PPAT	260	12	16792	16.1462	1	0.279522	21.0823
GOTERM_BP_DIRECT	GO:2000505~regulation of energy homeostasis	3	1.14943	0.0141251	CD36, MLXIPL, PRKAA2	260	12	16792	16.1462	1	0.279522	21.0823
GOTERM_BP_DIRECT	GO:0006641~triglyceride metabolic process	4	1.53257	0.0165022	LPL, CAV1, CAT, ACSL4	260	35	16792	7.3811	1	0.314598	24.1902
GOTERM_BP_DIRECT	GO:0072593~reactive oxygen species metabolic process	4	1.53257	0.0165022	GLS2, AOX1, PDK4, EPHX2	260	35	16792	7.3811	1	0.314598	24.1902
GOTERM_BP_DIRECT	GO:0006693~prostaglandin metabolic process	3	1.14943	0.0165251	AKR1C3, AKR1C2, PTGES	260	13	16792	14.9041	1	0.311139	24.2196
GOTERM_BP_DIRECT	GO:0045019~negative regulation of nitric oxide biosynthetic process	3	1.14943	0.0165251	CAV1, PTGIS, GLA	260	13	16792	14.9041	1	0.311139	24.2196
GOTERM_BP_DIRECT	GO:0055089~fatty acid homeostasis	3	1.14943	0.0165251	POLD1, MLXIPL, PRKAA2	260	13	16792	14.9041	1	0.311139	24.2196
GOTERM_BP_DIRECT	GO:0006369~termination of RNA polymerase II transcription	5	1.91571	0.0170586	SNRPB, RNPS1, SNRPF, SNRPE, SNRPG	260	64	16792	5.04567	1	0.315642	24.9008
GOTERM_BP_DIRECT	GO:0034599~cellular response to oxidative stress	5	1.91571	0.0170586	PYCR1, NME2, G6PD, NME1-NME2, ALDH3B1	260	64	16792	5.04567	1	0.315642	24.9008
GOTERM_BP_DIRECT	GO:0006364~rRNA processing	9	3.44828	0.0181771	RPL36A, RPS19, EXOSC4, EXOSC5, RPL26L1, RPL37, NOP56, RPL39, RPS21	260	214	16792	2.71618	1	0.328738	26.3105
GOTERM_BP_DIRECT	GO:0045821~positive regulation of glycolytic process	3	1.14943	0.0190853	GPD1, MLXIPL, PRKAA2	260	14	16792	13.8396	1	0.33821	27.4368
GOTERM_BP_DIRECT	GO:0030207~chondroitin sulfate catabolic process	3	1.14943	0.0190853	CSPG4, VCAN, DCN	260	14	16792	13.8396	1	0.33821	27.4368
GOTERM_BP_DIRECT	GO:0033700~phospholipid efflux	3	1.14943	0.0190853	APOC2, ABCA1, ABCG1	260	14	16792	13.8396	1	0.33821	27.4368
GOTERM_BP_DIRECT	GO:0006413~translational initiation	7	2.68199	0.0195693	EIF3C, RPL36A, RPS19, RPL26L1, RPL37, RPL39, RPS21	260	137	16792	3.29994	1	0.341309	28.0305
GOTERM_BP_DIRECT	GO:0050796~regulation of insulin secretion	5	1.91571	0.0198601	STX1A, SLC25A4, SLC2A1, RAPGEF4, KCNJ11	260	67	16792	4.81975	1	0.341612	28.3848
GOTERM_BP_DIRECT	GO:0042157~lipoprotein metabolic process	4	1.53257	0.0205665	LPL, APOC2, ABCA1, ABCG1	260	38	16792	6.79838	1	0.347623	29.2391
GOTERM_BP_DIRECT	GO:0006198~cAMP catabolic process	3	1.14943	0.0218001	PDE1B, PDE2A, PDE7A	260	15	16792	12.9169	1	0.360454	30.7079
GOTERM_BP_DIRECT	GO:0030214~hyaluronan catabolic process	3	1.14943	0.0218001	LYVE1, CD44, HMMR	260	15	16792	12.9169	1	0.360454	30.7079
GOTERM_BP_DIRECT	GO:0035690~cellular response to drug	5	1.91571	0.0218762	PDE2A, NME1, CAD, PRKAA2, PPAT	260	69	16792	4.68004	1	0.357682	30.7976
GOTERM_BP_DIRECT	GO:0030855~epithelial cell differentiation	5	1.91571	0.0229295	AKR1C2, ALDOC, BDH2, PGK1, AKR1C1	260	70	16792	4.61319	1	0.367582	32.0274
GOTERM_BP_DIRECT	GO:0051262~protein tetramerization	4	1.53257	0.0235538	ME1, SHMT2, RPS19, CAT	260	40	16792	6.45846	1	0.371736	32.7467
GOTERM_BP_DIRECT	GO:0008654~phospholipid biosynthetic process	4	1.53257	0.0235538	ISYNA1, PLA2G16, LPGAT1, LPCAT1	260	40	16792	6.45846	1	0.371736	32.7467
GOTERM_BP_DIRECT	GO:0006520~cellular amino acid metabolic process	4	1.53257	0.0235538	GLS2, GCAT, CAD, SLC25A15	260	40	16792	6.45846	1	0.371736	32.7467
GOTERM_BP_DIRECT	GO:0010613~positive regulation of cardiac muscle hypertrophy	3	1.14943	0.0246644	AGT, PDE5A, PDE9A	260	16	16792	12.1096	1	0.381725	34.0085
GOTERM_BP_DIRECT	GO:0010744~positive regulation of macrophage derived foam cell differentiation	3	1.14943	0.0246644	LPL, CD36, AGT	260	16	16792	12.1096	1	0.381725	34.0085
GOTERM_BP_DIRECT	GO:0006024~glycosaminoglycan biosynthetic process	4	1.53257	0.0267636	UGDH, HS6ST2, AGRN, SDC4	260	42	16792	6.15092	1	0.402962	36.333
GOTERM_BP_DIRECT	GO:0007077~mitotic nuclear envelope disassembly	4	1.53257	0.0301949	NUP62, RAE1, NUP210, NUP85	260	44	16792	5.87133	1	0.437706	39.9677
GOTERM_BP_DIRECT	GO:0046168~glycerol-3-phosphate catabolic process	2	0.766284	0.030611	GPD1L, GPD1	260	2	16792	64.5846	1	0.438234	40.3949
GOTERM_BP_DIRECT	GO:0009115~xanthine catabolic process	2	0.766284	0.030611	XDH, AOX1	260	2	16792	64.5846	1	0.438234	40.3949
GOTERM_BP_DIRECT	GO:0045004~DNA replication proofreading	2	0.766284	0.030611	POLD1, POLE	260	2	16792	64.5846	1	0.438234	40.3949
GOTERM_BP_DIRECT	GO:0033189~response to vitamin A	3	1.14943	0.0308202	TYMS, CAT, DNMT3B	260	18	16792	10.7641	1	0.436549	40.6086
GOTERM_BP_DIRECT	GO:0043691~reverse cholesterol transport	3	1.14943	0.0308202	APOC2, ABCA1, ABCG1	260	18	16792	10.7641	1	0.436549	40.6086
GOTERM_BP_DIRECT	GO:0006165~nucleoside diphosphate phosphorylation	3	1.14943	0.0308202	NME4, NME2, NME1	260	18	16792	10.7641	1	0.436549	40.6086
GOTERM_BP_DIRECT	GO:0036148~phosphatidylglycerol acyl-chain remodeling	3	1.14943	0.0308202	LPGAT1, LPCAT1, PLA2G4F	260	18	16792	10.7641	1	0.436549	40.6086
GOTERM_BP_DIRECT	GO:0009083~branched-chain amino acid catabolic process	3	1.14943	0.0341017	ALDH6A1, ACADSB, ACAT1	260	19	16792	10.1976	1	0.46648	43.8682
GOTERM_BP_DIRECT	GO:0043647~inositol phosphate metabolic process	4	1.53257	0.0357546	ISYNA1, PLCE1, INPP5J, ITPKA	260	47	16792	5.49656	1	0.478745	45.4457
GOTERM_BP_DIRECT	GO:0007010~cytoskeleton organization	7	2.68199	0.0388492	PLCE1, TUBB2A, TUBB6, AGRN, TUBA1A, TUBB3, TUBA1C	260	161	16792	2.80803	1	0.503807	48.2877
GOTERM_BP_DIRECT	GO:0006139~nucleobase-containing compound metabolic process	4	1.53257	0.0397332	TYMS, ATIC, PRPS2, TK1	260	49	16792	5.27221	1	0.507777	49.0736
GOTERM_BP_DIRECT	GO:0014070~response to organic cyclic compound	4	1.53257	0.0397332	G6PD, PTGES, ACACB, ACAT1	260	49	16792	5.27221	1	0.507777	49.0736
GOTERM_BP_DIRECT	GO:0016042~lipid catabolic process	5	1.91571	0.0424463	LPL, PLA2G16, PLCE1, PAFAH1B3, APOC2	260	85	16792	3.7991	1	0.527478	51.4161
GOTERM_BP_DIRECT	GO:0006412~translation	9	3.44828	0.0428618	SLC25A20, RPL36A, RPS19, SLC25A4, RPL26L1, RPL37, RPL39, RPS21, SLC25A15	260	253	16792	2.29748	1	0.527002	51.7658
GOTERM_BP_DIRECT	GO:0007568~aging	7	2.68199	0.0428817	TYMS, AGT, ENO3, CAT, RPN2, DCN, ADA	260	165	16792	2.73995	1	0.523219	51.7825
GOTERM_BP_DIRECT	GO:0075733~intracellular transport of virus	4	1.53257	0.0439264	NUP62, RAE1, NUP210, NUP85	260	51	16792	5.06546	1	0.528017	52.6509
GOTERM_BP_DIRECT	GO:0001822~kidney development	5	1.91571	0.0439989	ODC1, AGT, DCN, CA2, PPAT	260	86	16792	3.75492	1	0.524746	52.7107
GOTERM_BP_DIRECT	GO:0016311~dephosphorylation	5	1.91571	0.0439989	PFKFB4, EPHX2, ENOPH1, PSPH, LPIN3	260	86	16792	3.75492	1	0.524746	52.7107
GOTERM_BP_DIRECT	GO:0006090~pyruvate metabolic process	3	1.14943	0.0447028	SLC16A3, ME1, PC	260	22	16792	8.80699	1	0.526665	53.2869
GOTERM_BP_DIRECT	GO:0008295~spermidine biosynthetic process	2	0.766284	0.0455647	SRM, AGMAT	260	3	16792	43.0564	1	0.529802	53.9834
GOTERM_BP_DIRECT	GO:0019510~S-adenosylhomocysteine catabolic process	2	0.766284	0.0455647	AHCY, AHCYL2	260	3	16792	43.0564	1	0.529802	53.9834
GOTERM_BP_DIRECT	GO:0006543~glutamine catabolic process	2	0.766284	0.0455647	GLS2, PPAT	260	3	16792	43.0564	1	0.529802	53.9834
GOTERM_BP_DIRECT	GO:0090116~C-5 methylation of cytosine	2	0.766284	0.0455647	DNMT1, DNMT3B	260	3	16792	43.0564	1	0.529802	53.9834
GOTERM_BP_DIRECT	GO:0034371~chylomicron remodeling	2	0.766284	0.0455647	LPL, APOC2	260	3	16792	43.0564	1	0.529802	53.9834
GOTERM_BP_DIRECT	GO:1903598~positive regulation of gap junction assembly	2	0.766284	0.0455647	CAV1, AGT	260	3	16792	43.0564	1	0.529802	53.9834
GOTERM_BP_DIRECT	GO:0042853~L-alanine catabolic process	2	0.766284	0.0455647	GPT, GPT2	260	3	16792	43.0564	1	0.529802	53.9834
GOTERM_BP_DIRECT	GO:1904381~Golgi apparatus mannose trimming	2	0.766284	0.0455647	MAN1A1, MAN1C1	260	3	16792	43.0564	1	0.529802	53.9834
GOTERM_BP_DIRECT	GO:0006177~GMP biosynthetic process	2	0.766284	0.0455647	GMPS, IMPDH1	260	3	16792	43.0564	1	0.529802	53.9834
GOTERM_BP_DIRECT	GO:0071333~cellular response to glucose stimulus	4	1.53257	0.0461024	NME2, NME1-NME2, NME1, KCNJ11	260	52	16792	4.96805	1	0.530309	54.413
GOTERM_BP_DIRECT	GO:0006631~fatty acid metabolic process	4	1.53257	0.0461024	PRKAR2B, ACADSB, EHHADH, LYPLA1	260	52	16792	4.96805	1	0.530309	54.413
GOTERM_BP_DIRECT	GO:0046835~carbohydrate phosphorylation	3	1.14943	0.0484733	PFKFB4, HK3, HK2	260	23	16792	8.42408	1	0.5449	56.2625
GOTERM_BP_DIRECT	GO:0016239~positive regulation of macroautophagy	3	1.14943	0.0484733	HMOX1, PRKAA2, DCN	260	23	16792	8.42408	1	0.5449	56.2625

## Sheet: Table 4-2
Table 4-2 The KEGG annotations are filtered by Entities pVal < 0.05.
Category	Term	Count	%	PValue	Genes	List Total	Pop Hits	Pop Total	Fold Enrichment	Bonferroni	Benjamini	FDR
KEGG_PATHWAY	hsa01100:Metabolic pathways	119	45.5939	3.59584e-31	TUSC3, EHHADH, DTYMK, ADH1B, ITPKA, MTHFD1L, PRIM1, PTGIS, PRIM2, ENOPH1, RPN2, GPT2, ACAA2, ALDH6A1, POLE, LPCAT2, CDO1, NME4, PYCR1, NME2, PLCE1, CHPF, NME1, FLAD1, PRPS2, ME1, XDH, ACADSB, AHCY, NAGS, SRM, ALDOC, AGMAT, ACAT1, ADA, PPAT, TK1, ISYNA1, LPCAT1, POLE2, B3GNT4, B4GALT6, DNMT3B, GAD1, ODC1, MGAT4A, MAOA, MAOB, SPHK1, EPHX2, ACACB, POLD1, POLD2, PLA2G4F, DNMT1, QPRT, AHCYL2, PC, NNMT…	236	1219	6879	2.84549	8.55809e-29	8.55809e-29	4.63517e-28
KEGG_PATHWAY	hsa00230:Purine metabolism	31	11.8774	1.31223e-13	ADCY3, XDH, POLA2, HPRT1, PPAT, ADA, PRIM1, POLE2, PDE1B, ATIC, PRIM2, ENTPD2, IMPDH1, POLR3K, NUDT5, POLE, NPR1, GMPS, NME4, ITPA, NME2, PDE2A, NME1-NME2, PDE7A, NME1, POLD1, RRM2, POLD2, PDE5A, PDE9A, PRPS2	236	176	6879	5.13408	3.12324e-11	1.56162e-11	1.69154e-10
KEGG_PATHWAY	hsa01130:Biosynthesis of antibiotics	28	10.728	2.33244e-09	PYCRL, EHHADH, ALDOC, HK2, PSPH, ACAT1, PPAT, ISYNA1, ATIC, HK3, ENO3, CAT, GAPDH, ACAA2, ODC1, SHMT2, ACADM, NME4, PYCR1, NME2, G6PD, NME1-NME2, SQLE, NME1, ALDH1B1, PGK1, PSAT1, PRPS2	236	212	6879	3.84978	5.5512e-07	1.8504e-07	3.0066e-06
KEGG_PATHWAY	hsa01200:Carbon metabolism	20	7.66284	6.42125e-09	ME1, ALDH6A1, SHMT2, ACADM, EHHADH, ALDOC, HK2, PSPH, ACAT1, G6PD, HK3, ENO3, GPT, CAT, PGK1, PSAT1, GAPDH, GPT2, PRPS2, PC	236	113	6879	5.15899	1.52826e-06	3.82064e-07	8.27723e-06
KEGG_PATHWAY	hsa00240:Pyrimidine metabolism	18	6.89655	4.08697e-08	POLR3K, POLE, DTYMK, CAD, POLA2, TK1, PRIM1, NME4, TYMS, TYMP, NME2, NME1-NME2, POLE2, NME1, RRM2, POLD1, PRIM2, POLD2	236	101	6879	5.19475	9.72695e-06	1.9454e-06	5.26826e-05
KEGG_PATHWAY	hsa00410:beta-Alanine metabolism	10	3.83142	5.6849e-07	ALDH6A1, ACADM, SRM, ALDH1B1, EHHADH, SMOX, GAD1, SMS, ALDH3B1, AOC3	236	31	6879	9.40268	0.000135292	2.25499e-05	0.000732803
KEGG_PATHWAY	hsa00330:Arginine and proline metabolism	12	4.5977	6.73618e-07	ODC1, PYCR1, PYCRL, SRM, ALDH1B1, P4HA1, MAOA, P4HA3, MAOB, SMOX, AGMAT, SMS	236	50	6879	6.99559	0.000160308	2.29028e-05	0.000868316
KEGG_PATHWAY	hsa01230:Biosynthesis of amino acids	14	5.36398	7.32222e-07	PYCR1, PYCRL, SHMT2, NAGS, ALDOC, ENO3, GPT, PSAT1, PSPH, PGK1, GPT2, GAPDH, PRPS2, PC	236	72	6879	5.66773	0.000174254	2.17834e-05	0.000943857
KEGG_PATHWAY	hsa00270:Cysteine and methionine metabolism	9	3.44828	3.31383e-05	AHCY, SRM, DNMT1, IL4I1, ENOPH1, AHCYL2, CDO1, DNMT3B, SMS	236	38	6879	6.90355	0.00785603	0.000875955	0.0427081
KEGG_PATHWAY	hsa00380:Tryptophan metabolism	9	3.44828	4.91222e-05	ALDH1B1, EHHADH, MAOA, AOX1, MAOB, IL4I1, CAT, ACAT1, INMT	236	40	6879	6.55837	0.0116233	0.00116845	0.0633019
KEGG_PATHWAY	hsa00071:Fatty acid degradation	9	3.44828	7.10673e-05	ACAA2, CPT1B, ACADSB, ACADM, ALDH1B1, EHHADH, ADH1B, ACSL4, ACAT1	236	42	6879	6.24607	0.0167724	0.00153651	0.0915697
KEGG_PATHWAY	hsa00250:Alanine, aspartate and glutamate metabolism	8	3.06513	0.000147293	GLS2, IL4I1, GPT, CAD, ASNS, GAD1, GPT2, PPAT	236	35	6879	6.66247	0.0344509	0.00291727	0.1897
KEGG_PATHWAY	hsa00350:Tyrosine metabolism	8	3.06513	0.000147293	MAOA, AOX1, MAOB, ADH1B, IL4I1, ALDH3B1, AOC3, MIF	236	35	6879	6.66247	0.0344509	0.00291727	0.1897
KEGG_PATHWAY	hsa00280:Valine, leucine and isoleucine degradation	9	3.44828	0.000163377	ACAA2, ALDH6A1, ACADSB, ACADM, ALDH1B1, EHHADH, AOX1, IL4I1, ACAT1	236	47	6879	5.58159	0.0381406	0.00298683	0.210395
KEGG_PATHWAY	hsa00360:Phenylalanine metabolism	6	2.29885	0.000197017	MAOA, MAOB, IL4I1, ALDH3B1, AOC3, MIF	236	17	6879	10.2876	0.0458122	0.00334402	0.253665
KEGG_PATHWAY	hsa00480:Glutathione metabolism	9	3.44828	0.000294069	GPX2, ODC1, G6PD, GGCT, SRM, RRM2, GPX3, GSTO2, SMS	236	51	6879	5.14382	0.0676049	0.0046557	0.378404
KEGG_PATHWAY	hsa00620:Pyruvate metabolism	8	3.06513	0.000353047	ME1, ALDH1B1, LDHD, ACYP1, HAGHL, ACACB, ACAT1, PC	236	40	6879	5.82966	0.0806055	0.00523873	0.454137
KEGG_PATHWAY	hsa01212:Fatty acid metabolism	8	3.06513	0.00110536	ACAA2, CPT1B, ACADSB, ACADM, EHHADH, FADS2, ACSL4, ACAT1	236	48	6879	4.85805	0.231428	0.0153644	1.41553
KEGG_PATHWAY	hsa03030:DNA replication	7	2.68199	0.00122799	PRIM1, POLE2, POLD1, POLE, POLD2, PRIM2, POLA2	236	36	6879	5.66773	0.253561	0.0161155	1.57142
KEGG_PATHWAY	hsa00510:N-Glycan biosynthesis	8	3.06513	0.00125277	MGAT4A, TUSC3, FUT8, ALG3, RPN2, MAN1A1, ALG8, MAN1C1	236	49	6879	4.75891	0.257956	0.0155798	1.6029
KEGG_PATHWAY	hsa00010:Glycolysis / Gluconeogenesis	9	3.44828	0.0018836	ALDH1B1, ALDOC, HK3, HK2, ADH1B, ENO3, PGK1, GAPDH, ALDH3B1	236	67	6879	3.91544	0.361555	0.0221862	2.40103
KEGG_PATHWAY	hsa00260:Glycine, serine and threonine metabolism	7	2.68199	0.0018885	SHMT2, MAOA, MAOB, GCAT, PSAT1, PSPH, AOC3	236	39	6879	5.23175	0.3623	0.0211953	2.4072
KEGG_PATHWAY	hsa00670:One carbon pool by folate	5	1.91571	0.0041773	MTHFD2, TYMS, SHMT2, ATIC, MTHFD1L	236	20	6879	7.28708	0.630749	0.0442753	5.25297
KEGG_PATHWAY	hsa00051:Fructose and mannose metabolism	6	2.29885	0.00422075	SORD, PFKFB4, ALDOC, HK3, HK2, TSTA3	236	32	6879	5.46531	0.634564	0.042824	5.30625
KEGG_PATHWAY	hsa00983:Drug metabolism - other enzymes	7	2.68199	0.0044447	XDH, TYMP, ITPA, HPRT1, GMPS, IMPDH1, TK1	236	46	6879	4.43561	0.653612	0.0432133	5.5804
KEGG_PATHWAY	hsa00590:Arachidonic acid metabolism	8	3.06513	0.00449957	AKR1C3, GPX2, PLA2G16, PTGIS, PTGES, GPX3, EPHX2, PLA2G4F	236	61	6879	3.82273	0.658126	0.042024	5.64747
KEGG_PATHWAY	hsa00564:Glycerophospholipid metabolism	10	3.83142	0.00495801	GPD1L, GPD1, PLA2G16, LPGAT1, LPCAT1, TAZ, PLA2G4F, LYPLA1, LPCAT2, LPIN3	236	95	6879	3.06824	0.693623	0.0444782	6.20602
KEGG_PATHWAY	hsa03320:PPAR signaling pathway	8	3.06513	0.0075489	LPL, CPT1B, CD36, ACADM, EHHADH, FADS2, ACSL4, SLC27A2	236	67	6879	3.48039	0.835271	0.0646126	9.30585
KEGG_PATHWAY	hsa00640:Propanoate metabolism	5	1.91571	0.0142632	ALDH6A1, ACADM, EHHADH, ACACB, ACAT1	236	28	6879	5.20505	0.967258	0.114949	16.9047
KEGG_PATHWAY	hsa00565:Ether lipid metabolism	6	2.29885	0.0179019	PLA2G16, LPCAT1, ENPP2, PAFAH1B3, PLA2G4F, LPCAT2	236	45	6879	3.88644	0.986421	0.137784	20.7729
KEGG_PATHWAY	hsa05230:Central carbon metabolism in cancer	7	2.68199	0.0214366	GLS2, SLC16A3, G6PD, HK3, SLC2A1, HK2, PIK3R5	236	64	6879	3.1881	0.994243	0.157947	24.371
KEGG_PATHWAY	hsa00220:Arginine biosynthesis	4	1.53257	0.0292068	GLS2, NAGS, GPT, GPT2	236	20	6879	5.82966	0.999137	0.203535	31.7569
KEGG_PATHWAY	hsa00532:Glycosaminoglycan biosynthesis - chondroitin sulfate / dermatan sulfate	4	1.53257	0.0292068	CHPF, UST, CHPF2, CHST15	236	20	6879	5.82966	0.999137	0.203535	31.7569
KEGG_PATHWAY	hsa04931:Insulin resistance	9	3.44828	0.0309779	CPT1B, CD36, SLC2A1, MLXIPL, TRIB3, PIK3R5, PRKAA2, ACACB, SLC27A2	236	108	6879	2.42903	0.999441	0.208672	33.3445
KEGG_PATHWAY	hsa00340:Histidine metabolism	4	1.53257	0.0375413	ALDH1B1, MAOA, MAOB, ALDH3B1	236	22	6879	5.29969	0.999889	0.241161	38.9354
KEGG_PATHWAY	hsa04066:HIF-1 signaling pathway	8	3.06513	0.0453541	EIF4EBP1, HMOX1, HK3, SLC2A1, HK2, ENO3, PIK3R5, GAPDH	236	96	6879	2.42903	0.999984	0.277403	45.0257
