# Supplementary material for: Integrative Analysis Reveals Comprehensive Altered Metabolic Genes Linking with Tumor Epigenetics Modification in Pan-Cancer
Source: Biomed Res Int. 2019 Nov 7;2019:6706354. doi: 10.1155/2019/6706354 (PMC6881592; doi:10.1155/2019/6706354)
Supplement: Supplementary Materials — Supplementary Table 1: the number of sample information and differential expression genes for 11 different cancer types and 5 GEO data projects. Supplementary Table 2: the differential expression gene list and its fold change in 11 cancer types compared with normal samples. Supplementary Table 3: the metabolic genes and the differential expression of metabolic genes. Supplementary Table 4: the function annotations of MDEGs. Supplementary Table 5: the critical different expression genes related to epigenetic modification in the specific types of cancer. Supplementary Table 6: the genes with different expression and methylation influenced by DNMT3B expression. Supplementary Table 7: gene ontology analysis of differential expression and methylation genes. Supplementary Table 8: the correlation between expression and methylation of specific genes. Supplementary Table 9: the oncogene/tumor suppressor mutation frequency and the sample size with mutation across cancer types. Supplementary Table 10: the differential expression MDEGs in mutated samples compared with non-mutated samples across cancer types. Supplementary Table 11: the pathway enrichment analysis in each mutation group. Supplementary Figure 1: relationships among metabolic pathways, cancer types, and oncogene/suppressor gene mutations. [file 6706354.f1.zip › 6706354.f1/Supplementary Table5.xlsx]

## Sheet: Table 5-1
Table 5-1 The fold change of different expression metabolic genes related to epigenetic modification
Terms	Gene	ID	TCGA_BRCA	TCGA_COAD	TCGA_COADREAD	TCGA_HNSC	TCGA_KIRC	TCGA_KIRP	TCGA_LIHC	TCGA_LUAD	TCGA_LUSC	TCGA_STAD	TCGA_THCA
Methylation	SLC19A1	6573	2.03188	1.77286	1.88076	3.48396			1.84929	-1.74508	-1.95835	1.81124	-1.68963	9
	SLC44A4	80736	5.45789	-2.65548	-2.58873	-5.54744	-4.08547	1.73224	4.08254	1.71136	-4.18541			9
	DHFR	1719		1.64015	1.58004	1.68462				1.95583	2.24535	2.21855		6
	CHDH	55349			1.5351	-2.52789	-2.57395				-2.11684	3.37658		5
	BHMT	635					-2.50573	-10.2473	-2.08564					3
	MTHFD1	4522		1.87662	1.8295	1.71038			-1.55409	1.6587	1.82153	2.43684		7
	MTHFD2	10797	2.68388	3.11693	2.92252	2.33452	1.8059		1.95994	3.09386	4.19965	3.77847		9
	AHCY	191	1.59076	2.85603	2.89522		-1.5268	-1.64189	1.59949	2.06543	3.30882	2.35128		9
	MAT1A	4143	2.94535	9.72392	9.87887				-2.37123	3.01485	3.77815			6
	MAT2A	4144							1.62323				-1.70606	2
	DNMT1	1786	1.89234	2.13618	2.09125	2.63114			4.05123	1.98202	2.38746	3.36005		8
	DNMT3A	1788	1.7935			1.75344			4.21914	2.51737	2.51496	1.79596		6
	DNMT3B	1789	2.82901	3.98148	4.28477	6.96703		2.79271	7.10531	5.25836	8.17068	9.8985		9
Acetylation	SLC2A1	6513	2.6552	3.34374	3.32872	4.49573	3.60373		3.90412	12.6414	53.9412	2.28178		9
	HK2	3099		-2.07702	-2.02532	1.65028	10.0862	10.7851	5.30653		2.3933	3.07549	1.71929	9
	PKM2	5315	1.81148	1.91251	2.01986	1.98813			6.69768	2.02081	2.77593	2.16463		8
	PFKP	5214	1.52096			1.65401	3.6714	1.72985		4.95705	3.57878	1.7983		7
	SLC25A20	788	-1.72649	-2.98512	-2.81866	-1.60878	-1.84397	-1.64973			-2.24218	-1.50091		8
	FASN	2194		2.63088	2.51439				3.1581			2.42622		4
	ACACA	31		1.89591	1.79301		-1.76739		2.94988			1.8351		5
	ACLY	47		1.77888	1.74879	2.08154	2.4294		3.42266					5
	ACSS2	55902	-3.4747	-2.0222	-1.92003		-1.82984				-1.96105			5
	KAT2A	2648		3.05676	3.09734	2.33818	1.91521	2.18193	4.57325	3.43373	3.23557	2.88055		9
Glycosylation	GPI	2821		1.6265	1.6156	1.57018			2.08687	2.36461	4.03622	1.71243		7
	GFPT1	2673							1.79069	2.26308		2.36445		3
	GNPNAT1	64841	1.71082	1.87269	1.76674	2.06055	-1.69995	-1.79154		2.89721	2.17349	2.60367		9
	PGM3	5238		1.63575	1.5878	1.60375				1.77472	1.5841	2.40456		6
	UAP1	6675		-1.60748	-1.62472			-2.36755		1.70426				4
	OGT	8473		2.08608	2.12614	1.59867			2.62338	1.62578		2.36733		6

## Sheet: Table 5-2
Table 5-2 List of the critical different expression genes related to epigenetic modification in the specific types of cancer.
Terms	Genes	upregulation Cancer types	downregulation Cancer types
Methylation	SLC19A1	BRCA/COAD/COADREAD/HNSC/LIHC/STAD	LUAD/LUSC/THCA
	SLC44A4	BRCA/KIRP/LIHC/LUAD	COAD/COADREAD/HNSC/KIRC/LUSC
	DHFR	COAD/COADREAD/HNSC/LUAD/LUSC/STAD
	CHDH	COADREAD/STAD	HNSC/KIRC/LUSC
	BHMT		KIRC/KIRP/LIHC
	MTHFD1	COAD/COADREAD/HNSC/LUAD/LUSC/STAD	LIHC
	MTHFD2	BRCA/COAD/COADREAD/HNSC/KIRC/LIHC/LUAD/LUSC/STAD
	AHCY	BRCA/COAD/COADREAD/LIHC/LUAD/LUSC/STAD	KIRC/KIRP
	MAT1A	BRCA/COAD/COADREAD/LUAD/LUSC	LIHC
	MAT2A	LIHC	THCA
	DNMT1	BRCA/COAD/COADREAD/HNSC/LIHC/LUAD/LUSC/STAD
	DNMT3A	BRCA/HNSC/LIHC/LUAD/LUSC/STAD
	DNMT3B	BRCA/COAD/COADREAD/HNSC/KIRP/LIHC/LUAD/LUSC/STAD
Acetylation	SLC2A1	BRCA/COAD/COADREAD/HNSC/KIRC/LIHC/LUAD/LUSC/STAD
	HK2	HNSC/KIRC/KIRP/LIHC/LUSC/STAD	COAD/COADREAD
	PKM2	BRCA/COAD/COADREAD/HNSC/LIHC/LUAD/LUSC/STAD
	PFKP	BRCA/HNSC/KIRC/KIRP/LUAD/LUSC/STAD
	SLC25A20		BRCA/COAD/COADREAD/HNSC/KIRC/KIRP/LUSC/STAD
	FASN	COAD/COADREAD/LIHC/STAD
	ACACA	COAD/COADREAD/LIHC/STAD	KIRC
	ACLY	COAD/COADREAD/HNSC/KIRC/LIHC
	ACSS2		BRCA/COAD/COADREAD/KIRC/LUSC
	KAT2A	COAD/COADREAD/HNSC/LIHC/LUAD/LUSC/KIRC/KIRP/STAD
Glycosylation	GPI	COAD/COADREAD/HNSC/LIHC/LUAD/LUSC/STAD
	GFPT1	LIHC/LUAD/STAD
	GNPNAT1	BRCA/COAD/COADREAD/HNSC/LUAD/LUSC/STAD	KIRC/KIRP
	PGM3	COAD/COADREAD/HNSC/LUAD/LUSC/STAD
	UAP1	LUAD	COAD/COADREAD/KIRP
	OGT	COAD/COADREAD/HNSC/LIHC/LUAD/STAD
