# Supplementary material for: Integrative Analysis Reveals Comprehensive Altered Metabolic Genes Linking with Tumor Epigenetics Modification in Pan-Cancer
Source: Biomed Res Int. 2019 Nov 7;2019:6706354. doi: 10.1155/2019/6706354 (PMC6881592; doi:10.1155/2019/6706354)
Supplement: Supplementary Materials — Supplementary Table 1: the number of sample information and differential expression genes for 11 different cancer types and 5 GEO data projects. Supplementary Table 2: the differential expression gene list and its fold change in 11 cancer types compared with normal samples. Supplementary Table 3: the metabolic genes and the differential expression of metabolic genes. Supplementary Table 4: the function annotations of MDEGs. Supplementary Table 5: the critical different expression genes related to epigenetic modification in the specific types of cancer. Supplementary Table 6: the genes with different expression and methylation influenced by DNMT3B expression. Supplementary Table 7: gene ontology analysis of differential expression and methylation genes. Supplementary Table 8: the correlation between expression and methylation of specific genes. Supplementary Table 9: the oncogene/tumor suppressor mutation frequency and the sample size with mutation across cancer types. Supplementary Table 10: the differential expression MDEGs in mutated samples compared with non-mutated samples across cancer types. Supplementary Table 11: the pathway enrichment analysis in each mutation group. Supplementary Figure 1: relationships among metabolic pathways, cancer types, and oncogene/suppressor gene mutations. [file 6706354.f1.zip › 6706354.f1/Supplementary Table6.xlsx]

## Sheet: LIHC
Table6-1. The different methylation probes in LIHC
Probe	Δβ in normal vs.tumor	Δβ in bottom vs.top	Gene
cg21765730	-0.224964	0.236195	NOX3
cg13868604	0.28396	-0.214438	GDAP1L1
cg01250212	-0.249071	-0.281596	GNG7
cg04951797	-0.280767	-0.273723	SGOL1
cg13788685	-0.355396	-0.239812	SDHC
cg17336139	-0.259755	-0.216316	PRAME
cg11104088	0.314563	-0.267857	TAF3
cg11850943	-0.246228	-0.228391	LANCL2
cg25706012	-0.211181	-0.217439	ELFN1
cg11353792	-0.223248	0.227429	LOC284379
cg20945566	0.203182	0.249716	PRAC
cg19714957	0.226302	-0.238072	ZNF14
cg01076997	0.253592	0.247938	ELFN2
cg01703997	-0.300739	0.239598	OR10G2
cg00114012	-0.215668	-0.225929	SLC2A8
cg23055236	-0.251313	-0.22398	SERPINE2
cg26335602	0.201603	-0.212167	ZNF389
cg01762827	0.216897	0.231675	HAS3
cg27262398	-0.251494	0.220499	SLN
cg09318158	-0.248122	0.212123	MIR1283-1
cg12989650	-0.214154	0.211274	ARHGEF15
cg24873592	0.233061	-0.292219	TINAGL1
cg10689409	-0.297207	0.208221	OR9I1
cg23213217	-0.248985	-0.227167	DEGS1
cg11225751	-0.218785	-0.232496	PRAME
cg09611620	-0.215376	-0.219156	FOXP1
cg06442489	-0.343131	-0.228191	ZSCAN18
cg08536358	-0.265328	0.2176	PDHA2
cg10956811	-0.209036	0.229878	ETV3L
cg07012823	-0.320331	0.25599	NOX3
cg15790820	0.343987	0.202072	ASCL2
cg05623727	-0.266958	-0.238323	RBM5
cg03234186	0.310189	0.213112	ZNF154
cg20345915	-0.239744	0.245944	RGS10
cg09221951	-0.212176	0.253159	CNIH4
cg03067828	-0.214246	0.229477	ZNF320
cg05292478	-0.223704	-0.269106	SMURF1
cg12875426	-0.213303	-0.21961	DYM
cg05592245	-0.24728	-0.231363	REEP3
cg02700130	-0.241258	0.236332	LOC285401
cg14502728	0.234948	-0.276975	FRAS1
cg03070741	-0.258608	-0.240526	GNG7
cg23865597	-0.228727	-0.201104	DYM
cg17961932	-0.205214	0.216223	DPRX
cg16676292	0.250261	0.232518	ARHGAP1
cg13848707	0.228885	-0.34211	TET1
cg20441902	-0.220006	-0.219152	FUT2
cg25060890	-0.220454	-0.205176	RPS6KC1
cg21831174	0.218134	0.201546	MASP1
cg16066219	0.219209	0.214726	ACSL5
cg22108567	0.216352	0.200896	MIR589
cg03368046	-0.205408	-0.213531	FAM186A
cg23924737	-0.258959	-0.266221	MRPS23
cg01999046	-0.303476	-0.216754	TRAF2
cg22079161	0.30469	-0.281043	AFAP1
cg23082281	-0.242751	-0.299307	LQK1
cg13334650	0.227574	-0.291623	APBB1
cg03212674	-0.228519	-0.211531	CLK2
cg01576260	-0.230612	0.222518	LOC285401
cg05306745	0.289813	-0.310867	TIMP2
cg13873802	-0.212364	-0.214664	MUC12
cg02516101	-0.211346	-0.214606	CSNK1E
cg18232313	-0.247081	-0.221538	NHLRC1
cg16341979	-0.203332	0.202503	IFI27
cg03564727	-0.408772	-0.229085	KCNA7
cg07303143	-0.371621	-0.208725	KIAA1143
cg02060732	-0.361303	-0.277249	HRNBP3
cg12506930	0.299709	0.228194	ZNF154

## Sheet: KIRC
Table6-2. The different methylation probes in KIRC
Probe	Δβ in normal vs.tumor	Δβ in bottom vs.top	Gene
cg00931644	0.342958	0.247107	KCTD12
cg14989243	0.24324	0.201894	FILIP1
cg13435326	0.212466	0.235784	PIK3CA
cg15811515	0.315949	0.228625	CSDAP1
cg25968569	0.313804	0.219496	KCTD12
cg27026192	0.214365	0.246922	KIFC3
cg08253651	0.243654	0.240218	SNRPF
cg01393327	0.216019	0.263688	OSTBETA
cg05227215	0.255807	0.265722	CXXC5
cg07589773	0.200608	0.209834	IKZF1
cg17219660	0.289608	0.200595	GPR37L1
cg07600533	0.362899	0.246417	KLHDC7B
cg12733396	0.306966	0.205135	COL9A2
cg17098965	-0.281227	-0.233899	ZNF217
cg22249529	0.24377	0.213941	KLHDC7B
cg07676859	0.280345	0.207144	SSTR4
cg04016730	0.208601	0.234463	NFKBIL1
cg13829089	0.303029	0.213744	TNFSF13
cg07935264	-0.205107	-0.208518	IL1B
cg26256263	0.271793	0.214962	RUNX3
cg13947995	0.208924	0.241855	FES
cg02993070	0.296156	0.203624	FERMT2
cg12569246	0.278236	0.213047	FILIP1
cg02852670	0.260053	0.238612	KLHL33
cg03890691	0.332508	0.202616	DOC2A
cg12408990	0.257455	0.208309	RASGEF1C

## Sheet: BRCA
Table6-3. The different methylation probes in BRCA
Probe	Δβ in normal vs.tumor	Δβ in bottom vs.top	Gene
cg21535462	0.228675	-0.242146	KRR1
cg12389461	-0.31242	0.238792	RASSF2
cg18075666	0.2149	0.223588	CALD1
cg00491021	0.201567	0.246633	PLAT
cg20945566	0.365928	0.214981	PRAC
cg16623734	-0.2617	-0.274711	ANKRD11
cg20033652	-0.356574	0.226478	NIN
cg08651937	-0.367389	0.21205	PA2G4P4
cg05661282	0.328652	0.242824	ZNF154
cg02938205	0.313603	0.277985	CCDC36
cg19509125	-0.304079	0.201653	MAPK10
cg02511723	-0.256217	0.215826	MAP1B
cg14768785	0.315195	0.284275	GHSR
cg24788034	-0.286492	0.223691	GNG7
cg06204735	0.345921	-0.217025	TMEM90A
cg13545212	0.354185	0.294981	SLC13A5
cg11417025	0.340146	-0.23328	SOSTDC1
cg16490191	-0.202523	-0.21906	UNKL
cg17116120	0.203629	0.25169	COX4I2
cg16971668	0.215198	0.217577	EOMES
cg27189087	0.320908	0.234321	RAX
cg04536856	-0.289379	0.223961	MRVI1
cg14780632	0.426731	0.379637	GAL3ST3
cg27135125	0.228048	-0.207346	IGF2BP3
cg26353296	0.281832	-0.26686	USP4
cg03989567	-0.312685	0.202629	LGALS8
cg00585116	-0.207454	-0.221209	PSCA
cg09353705	0.28859	-0.211551	KANK4
cg15748555	-0.243022	0.217002	KLHL29
cg03830929	-0.32682	0.201207	TPM3
cg08972357	-0.296114	0.220887	C5orf37
cg18085435	-0.207952	0.205613	ATP8B1
cg06087421	0.206592	0.204764	TAL1
cg24333469	0.235867	0.38448	SLC7A4
cg20378070	0.201223	-0.217501	DHX16
cg13032463	0.256658	0.231037	T
cg19630689	0.230662	-0.208531	SERPINA12
cg21484956	0.247777	-0.202378	CSRP2
cg24181605	-0.251852	0.215033	C2CD4B
cg24761507	0.363978	-0.205366	LHX1
cg00871371	0.269361	-0.246196	2019-09-09
cg04837847	-0.217505	0.20266	C1orf49
cg15023858	-0.360224	0.281315	MITF
cg06186450	0.246169	0.241089	SHC1
cg17144305	-0.312996	0.220674	PCNXL2
cg21936464	-0.309208	0.225333	LELP1
cg18557556	0.20861	-0.240393	KRR1
cg22775000	0.239441	-0.211545	TMEFF1
cg03961010	-0.235496	0.232419	ZNF365
cg13911594	-0.202107	0.202183	MUC2
cg17030173	0.254208	0.260344	2019-03-11
cg24137660	-0.22323	0.221647	OR1J4
cg01062470	-0.264898	-0.241233	KIF24
cg07469637	0.360298	-0.226898	CDK6
cg23357130	0.304735	0.259951	OSBPL5
cg10898212	0.203258	-0.212382	CDK5R1
cg17712694	0.275986	0.264023	2019-03-11
cg17269633	0.342325	-0.224917	C17orf104
cg04567302	-0.254038	0.278937	SLC44A4
cg14081251	-0.287626	0.233159	ST6GALNAC4
cg04597433	0.276988	0.227476	DRD5
cg02852025	-0.246232	0.210888	IKZF1
cg08113245	0.324925	-0.22022	SNRPF
cg03879291	-0.218296	0.252124	C3orf39
cg23363832	0.25334	-0.223048	RBP1
cg23663774	0.21732	0.26089	PITX2
cg11473616	-0.208533	0.216746	CYP1A2
cg02711212	-0.285242	0.208911	LOC145837
cg04379738	0.241427	-0.216535	POLE2
cg14078335	-0.21807	0.206241	NUMA1
cg06943420	0.250858	0.201753	MMP23A
cg03466124	0.223574	-0.211518	GNB4
cg07570723	0.278826	-0.219069	KIAA0754
cg20663376	0.370247	-0.239787	TRPM1
cg17019053	0.271809	0.201821	C2orf65
cg05516499	-0.206766	0.222989	RASSF6
cg15617814	0.203646	0.212369	NTM
cg06363129	0.297534	-0.238874	SOSTDC1
cg04054731	0.202206	0.230237	SLC7A4
cg03757145	0.274106	0.201277	CDKL2
cg12042659	0.231631	0.215353	ZNF132
cg17997279	0.207248	-0.213823	CYP24A1
cg13797779	-0.212155	0.204823	C14orf177
cg02916816	0.252079	0.236931	JPH4
cg14826683	-0.302068	0.244659	SPRR2D
cg14802097	-0.313721	0.263519	PRICKLE1
cg14652095	0.282618	-0.216397	HIST1H1A
cg18197392	0.345753	0.207028	SSTR4
cg10364040	0.399693	0.244474	HOXD10
cg21901718	0.215704	0.200967	2019-03-11
cg17463633	-0.416	0.201915	LOC100130331
cg27292264	-0.21007	0.213307	MIR1280
cg17280346	0.209441	-0.239862	ZIC1
cg06275635	-0.250496	0.264483	PGLYRP3
cg23474501	0.224976	0.229282	GPR123
cg14219854	0.217532	-0.216474	MTERFD1
cg18689454	0.206425	0.201495	AIRE
cg06315208	-0.21823	-0.265688	MDC1
cg17214381	0.338	0.218908	ZFP42
cg07220448	0.29423	-0.225938	SOSTDC1
cg13206017	0.20376	0.200907	SST
cg10168635	0.267563	-0.211469	C2orf88
cg16404371	0.355024	0.270705	SLC2A14
cg21857668	-0.263494	0.221899	PHLDB2
cg16702815	-0.324586	0.226832	AGR3
cg00613562	0.305121	-0.218739	SULF1
cg06204711	0.207908	0.218195	TBX15
cg04879722	-0.286266	0.242655	ZBTB20
cg14625175	0.405266	-0.212156	HOXA10
cg25620356	0.266948	-0.210599	HDAC9
cg14263942	0.281991	0.226847	CDKL2
cg15015639	0.283472	0.205561	DES
cg26296488	0.329567	0.214233	DRD5
cg02836529	0.260276	0.203336	NEUROD1
cg12091331	0.31014	0.229943	PLAT
cg21238818	0.222417	0.205503	GAL3ST3
cg06014401	0.216779	0.238265	EOMES
cg18868483	0.301089	-0.203349	B3GAT2
cg25459558	0.408792	-0.21746	COL11A2
cg05684406	0.229351	0.386843	SLC7A4
cg01454592	0.245132	0.226827	CCDC36
cg24960947	0.468032	0.269736	GAL3ST3
cg01901579	-0.297305	0.300399	DICER1
cg10173620	-0.292474	0.210102	ABHD2
cg07909128	-0.217673	0.242227	SPRR1A
cg07792478	0.474025	0.222638	MIR124-2
cg01940425	0.212696	-0.243064	OTX1
cg02846790	-0.264977	0.215799	ADCYAP1R1
cg22790377	0.230211	-0.211926	C1orf35
cg15037004	-0.316043	0.210179	ZNF366
cg21415530	0.267942	-0.22374	KCNK9
cg19736608	0.276488	-0.205045	CORIN
cg08253651	0.259321	-0.209506	SNRPF
cg04965987	0.215681	0.204673	DSCR6
cg10344081	0.294167	0.201041	CDKL2
cg10400707	0.379884	-0.240065	VANGL2
cg11819637	-0.262981	0.275228	THPO
cg16232183	0.20143	0.264932	CLDN10
cg19239041	-0.267066	0.208457	RASSF2
cg13356896	0.332262	0.23601	BOLL
cg06126713	0.395028	-0.240618	SOSTDC1
cg16706260	-0.310764	0.207634	REP15
cg03530754	0.313036	0.220715	TMEM132C
cg21461649	0.398792	0.218085	CFTR
cg26435572	0.208651	-0.223976	HOXA11AS
cg24432073	0.20478	0.205554	CDKL2
cg02085507	0.372686	-0.326979	TRIP10
cg24158160	-0.272949	0.229942	C1orf230
cg05308656	0.253266	-0.2182	ARL4C
cg04511041	0.25218	0.231361	PCDHB18
cg05474726	0.245002	0.242891	MIR124-2
cg01973181	-0.282801	0.212856	CCDC92
cg26383138	-0.216632	-0.249687	MYT1L
cg26688527	0.291417	0.202376	LHX8
cg22486834	0.367285	-0.255757	GSTA4
cg22383888	0.204628	0.261947	EOMES
cg00063174	0.326159	0.203412	WDR69
cg11270393	0.308156	0.267048	ITPRIPL1
cg10984625	-0.200341	0.207265	LRRFIP1
cg22529184	-0.34619	0.251455	ANKRD45
cg14710465	0.26131	-0.201004	VANGL2
cg11475550	0.200059	0.222608	NPY
cg12506930	0.323833	0.202261	ZNF154
cg15916004	0.271634	0.204902	GAL3ST3
cg25119415	-0.243854	-0.211167	MNDA
cg15987088	0.237596	0.20794	GHSR
cg07519235	0.459351	-0.281031	GPRC5B
cg03596016	0.263756	0.341416	LOC149134
cg15720832	0.21132	-0.230271	C1orf35
cg02917246	0.22319	0.222945	GSC2
cg02331808	-0.274366	0.234641	APBA2
cg21113446	0.215296	-0.244273	PPP2R2B
cg02324432	0.253122	-0.222064	KLHL2
cg00161955	-0.224836	-0.211567	SLC10A5
cg16392797	-0.262211	0.2144	LOC100128788
cg10776919	0.266572	-0.204924	DMRTA2
cg04092747	-0.201974	0.248472	ANKRD45
cg04203238	0.274658	-0.202118	PROM1
cg23500122	0.202825	0.211313	GHSR
cg13392302	-0.202329	-0.263516	PSCA
cg26010218	0.313468	-0.204009	FRAS1
cg08960448	-0.330953	0.229206	2019-09-12
cg09373136	-0.265631	0.215028	TCAM1
cg08622369	-0.282775	0.213959	KLHL29
cg00535683	-0.236297	0.257327	SPRR2C
cg02320862	0.350534	-0.201372	2019-09-09
cg04243822	0.216055	-0.260308	C1QTNF1
cg18664866	-0.20811	0.20071	RPS6KL1
cg27645955	0.252665	0.302175	SLC7A4
cg25147193	0.221637	0.228849	MIR181C
cg08670465	-0.304335	0.207865	LCP2
cg19499884	0.229586	0.202015	LZTS2
cg00680551	0.424494	-0.240439	NCALD
cg06274159	0.334945	0.225968	ZFP42
cg10119001	-0.245725	0.222609	SPRR2C
cg23448584	0.321016	0.208625	CPXM1
cg09841842	0.346443	-0.314652	FRMD6
cg03602280	0.264204	0.224884	FAM38B
cg27049766	0.32279	0.206811	ZNF154
cg04557423	-0.330779	0.245129	LOC727677
cg07809176	-0.261581	0.216332	REP15
cg08816590	0.288288	0.222595	PDE1B
cg27530053	-0.203534	0.228398	FAM83E
cg03394422	-0.214475	0.203408	RPS6KL1
cg17264670	0.429422	-0.201692	RGS17
cg16150752	0.291878	0.26599	2019-03-11
cg07617759	0.328733	-0.237242	LOC285045
cg24161501	0.202877	0.21821	TCTEX1D1
cg27527798	-0.279975	-0.296232	ELFN1
cg14025883	-0.276606	0.209086	C9orf46
cg03686593	0.259414	0.241265	FAM38B
cg23244234	-0.288259	0.222901	BACH2
cg02068166	-0.268898	0.239882	C2CD4B
cg03117976	0.226201	0.22601	FAM38B
cg23631538	-0.3347	0.235517	DENND2D
cg14988503	0.210715	0.259051	CDKL2
cg18236571	0.263708	-0.207269	PABPC4L
cg23644624	0.209342	0.254342	SLC7A4
cg14420245	0.244181	-0.251405	ACVR2A
cg12633764	-0.295314	0.213765	MAPT

## Sheet: LUAD
Table6-4. The different methylation probes in LUAD
Probe	Δβ in normal vs.tumor	Δβ in bottom vs.top	Gene
cg20931042	0.240368	0.201459	DRD4
cg04768602	0.244489	0.201597	OSR2
cg05241355	0.288045	0.217753	OTX2
cg17025555	-0.232728	-0.210465	OR6K6
cg04372674	0.214314	0.244475	AQP1
cg00040312	0.246944	0.211328	HOXC4
cg00937286	-0.215177	-0.207642	LOC286094
cg26570179	0.200236	0.215489	OSR2
cg25075794	0.226309	0.243817	AQP1
cg17134153	-0.201817	-0.207908	FCRL3
cg13935127	-0.213494	0.220597	RIMS3
cg27331241	0.245786	0.244273	PRKAR1B
cg00556112	0.240552	0.200407	DRD4
cg01520122	-0.202469	-0.204407	CCL7
cg16601494	0.224699	0.262437	C1orf70
cg08347183	0.22168	-0.210475	FLJ45983
cg24724428	0.206045	-0.268614	ELOVL2
cg02571816	0.216135	-0.22233	PPP1R14A
cg08850243	0.209292	0.217928	TRIM26
cg08786003	-0.246511	-0.231663	FCRL3
cg07558472	0.241693	0.22918	CXXC5
cg00356183	0.234498	0.250019	PRKAR1B
cg17566118	0.250489	-0.201839	FLJ45983
cg12928379	0.267589	0.249531	DRD4
cg01010211	0.294925	0.251691	CECR2
cg05995220	0.216244	-0.213297	RBM38

## Sheet: KIRP
Table 6-5. The different methylation probes in KIRP
Probe	Δβ in normal vs.tumor	Δβ in bottom vs.top	Gene
cg16421467	-0.315055	-0.291707	FAM71D
cg12630147	0.244515	0.239358	TET1
cg06470424	0.346552	0.20283	CSNK1G2
cg03283421	-0.242185	-0.273749	FAM24B
cg05323879	0.250453	0.219338	HOXB3
cg02157894	0.239114	0.216622	ATF7
cg01380361	-0.295067	-0.372837	PFKFB2
cg15731317	-0.374729	-0.236915	SYTL2
cg05349837	-0.328756	-0.301563	HOXC4
cg00583003	-0.288956	-0.210041	SPP1
cg13664588	0.338896	0.225984	SNORD1A
cg04077979	-0.266789	-0.31347	FILIP1
cg25340966	0.205872	0.246628	TBX15
cg21622977	-0.223639	-0.219513	RBPMS
cg17660833	-0.538052	-0.349148	HRH1
cg20306842	-0.219441	-0.265698	CREB5
cg22753340	0.305185	0.290317	NEU1
cg00556112	0.238565	0.337065	DRD4
cg06361793	-0.297795	-0.230741	SLC17A3
cg04418091	0.323066	0.200659	ATP5G2
cg23031196	-0.317557	-0.213091	SLC38A1
cg21386933	-0.246424	-0.265841	WHAMM
cg06632207	0.353631	0.24931	ATP5G2
cg07583137	-0.22196	-0.21042	CHMP4C
cg17463698	-0.314654	-0.28011	WHAMM
cg01944226	-0.284361	-0.241763	SLC16A3
cg09715009	-0.318476	-0.219792	CPLX2
cg09182455	-0.419892	-0.240066	CORO1C
cg18241962	0.310089	0.225612	2019-09-09
cg24337786	0.284944	0.215653	MAP4K1
cg14659930	0.302652	0.242281	ZBTB20
cg20970369	0.217181	0.281119	DENND2D
cg11800117	0.293577	0.220318	C11orf75
cg01812894	-0.26035	-0.242057	ALDH1A1
cg22534097	-0.224694	-0.279976	ANKRD1
cg03839782	-0.211466	-0.209081	FAM65B
cg20962532	0.209952	0.220751	KCNJ1
cg01942558	-0.485797	-0.261835	TNFAIP6
cg18376497	-0.505603	-0.240976	INPP4B
cg07798731	-0.227782	-0.24644	C10orf99
cg04705659	0.329283	0.323331	PLEKHA6
cg17720013	0.248355	0.227184	IGFL4
cg13585930	-0.34435	-0.231995	NPFFR1
cg18582260	-0.461868	-0.262462	PARP4
cg26531231	-0.26089	-0.278872	CHRNA9
cg23929194	0.248581	0.243164	OGDH
cg06182584	0.275977	0.215334	C6orf136
cg05913474	-0.207881	-0.202167	FAM83H
cg00021476	0.320354	0.26868	KIAA0182
cg01629240	0.267383	0.223647	HOXB3
cg00044372	-0.371996	-0.261031	KIAA0513
cg11176694	0.208355	0.234838	CXXC5
cg09122223	-0.342156	-0.25912	IL18
cg22817993	0.222597	0.244095	GABRD
cg13487918	-0.420023	-0.254645	PLCD1
cg01426475	-0.374443	-0.235963	RAPGEF5
cg06800962	-0.265118	-0.221406	TM4SF1
cg06825142	0.234732	0.322057	DRD4
cg22286382	-0.421378	-0.264019	SLC17A3
cg24467349	0.20525	0.239009	GSTM5
cg23174932	0.319668	0.286468	NEU1
cg16929739	-0.38802	-0.203425	HRH1
cg05856951	-0.298609	-0.235519	HMOX2
cg11968091	0.261459	0.230348	ODZ4
cg08876518	0.31802	0.215631	CMIP
cg21175685	-0.401778	-0.271781	COL8A1
cg00403498	0.310526	0.292086	PRRT1
cg07599133	0.260775	0.229462	LOC643719
cg22287064	0.352502	0.269582	MYO15B
cg09727050	-0.395017	-0.258292	TNFAIP6
cg01896341	0.206452	0.273233	LFNG
cg14016236	0.28886	0.331422	FNDC3B
cg07425204	0.403928	0.276425	PRKAR1A
cg25416125	0.292149	0.236651	DGKA
cg07042532	-0.32291	-0.245759	CREB5
cg08836954	-0.315907	-0.214031	SQSTM1
cg15289427	0.286669	0.290381	FAM65B
cg08677140	0.237572	0.236953	PPP1R10
cg05227215	0.41792	0.295205	CXXC5
cg25848339	-0.267101	-0.270378	GRB10
cg01069159	0.224871	0.206386	GABRA1
cg01990102	0.250253	0.241554	HOXB3
cg23620049	-0.210443	-0.272348	LIPH
cg17117459	-0.404615	-0.213973	PARP4
cg17580613	-0.243252	-0.282007	C7orf30
cg11200222	0.223762	0.244513	KCNK2
cg15033552	-0.370356	-0.301451	CAPN2
cg25364469	0.265842	0.211274	ZBTB20
cg25421530	-0.256366	-0.258052	SORBS1
cg21944455	-0.366625	-0.254991	GFAP
cg04482794	0.222422	0.229392	ITPKB
cg24885631	0.258444	0.242296	PPP2R2D
cg09936663	-0.30808	-0.233886	KBTBD11
cg13445177	-0.296279	-0.275621	S100A10
cg00658590	-0.312273	-0.228749	FHIT
cg00913954	-0.340215	-0.213335	STK40
cg18325315	-0.413952	-0.200976	GTF2IRD1
cg04112102	-0.26631	-0.245019	SLC39A10
cg08622198	-0.383524	-0.229831	CHRM3
cg23574281	-0.258963	-0.265733	FAM110C
cg12855522	0.229853	0.253788	CPNE5
cg04858586	0.269997	0.228409	RABGAP1L
cg19572766	0.287277	0.210073	SAMD14
cg25594899	0.274272	0.238051	FAM132A
cg26846864	-0.39618	-0.22383	MEFV
cg07679948	0.505412	0.25529	DGKA
cg20335213	-0.227034	-0.272758	ARHGAP29
cg14333454	-0.308226	-0.230119	SFN
cg02233614	0.281965	0.249942	PFKFB2
cg08778148	-0.217302	-0.206258	TFPI
cg02566978	0.319653	0.21327	CSK
cg21581873	0.203569	0.220934	PLEKHA6
cg19634573	0.390446	0.256207	FAM53B
cg05504354	-0.239243	-0.218054	KITLG
cg14578677	-0.239813	-0.208983	TLR6
cg21860675	-0.204294	-0.213287	FOXP1
cg22129276	-0.502123	-0.245753	DHRS9
cg14731462	-0.527435	-0.298088	PTPRE
cg23670794	-0.341021	-0.283402	ZBED2
cg09367198	0.320641	0.247075	ACIN1
cg16578549	-0.348786	-0.222993	CTNNBIP1
cg13707793	0.468436	0.223847	CXXC5
cg09373727	-0.266603	-0.244029	PTP4A2
cg12669354	-0.351822	-0.247543	CD151
cg08409642	-0.215891	-0.334622	MT2A
cg04629133	0.24256	0.268221	PLAGL2
cg09400566	0.243178	0.200258	C19orf23
cg00449608	-0.317899	-0.223202	GPR45
cg11808936	0.30593	0.202487	AFAP1
cg03583016	0.304626	0.204647	FLJ32063
cg21475402	0.390092	0.289514	BCAN
cg06119874	-0.306841	-0.273649	PFKFB2
cg26864526	-0.369523	-0.218723	HRH1
cg02901136	-0.407235	-0.238683	S100A12
cg00249511	0.404346	0.214073	SCT
cg01311222	-0.357542	-0.266268	HEG1
cg16657538	0.317682	0.309305	ZNF397OS
cg06691218	0.328099	0.242727	PNMA2
cg11479035	-0.250099	-0.263764	MIR1276
cg03648711	0.255349	0.275769	ODZ4
cg05328761	-0.380942	-0.274141	C4orf26
cg01715172	-0.298669	-0.224862	ESR1
cg23516451	-0.203218	-0.347264	OSMR
cg14901205	0.248233	0.265465	MIR129-2
cg19601328	0.240077	0.261975	MAP3K14
cg24277788	0.243307	0.203481	ACSL1
cg03478610	-0.399903	-0.257523	PPP2R3A
cg14089984	0.254019	0.235812	FAM132A
cg22304662	-0.247334	-0.210919	ZBTB47
cg11807153	-0.251611	-0.255271	VTRNA1-2
cg10183885	-0.269874	-0.206272	SLC16A3
cg02599463	0.298058	0.306903	BCAN
cg00715696	0.455499	0.211421	KIAA0182
cg06836480	-0.240056	-0.249661	DHRS9
cg06204229	-0.313541	-0.234931	ITIH4
cg12928379	0.301556	0.389129	DRD4
cg01195214	0.243602	0.218892	UBE2I
cg13672342	0.278134	0.264218	CIAO1
cg00792251	-0.328102	-0.282232	CAPN2
cg15861585	0.200945	0.26151	DRD4
cg10415570	-0.307003	-0.294107	ZFHX3
cg11702866	-0.444427	-0.211351	HRH1
cg03883256	0.265289	0.225047	USP2
cg06443533	0.283606	0.28046	FAM132A
cg06457736	-0.446225	-0.240559	HRH1
cg24631162	0.218202	0.221169	BAT1
cg24258705	-0.472458	-0.255052	MET
cg22995176	0.223739	0.215064	UPK3B
cg09588020	0.242517	0.233173	WASF2
cg08378932	-0.369307	-0.262555	TM4SF4
cg02993070	0.494922	0.24374	FERMT2
cg08995424	0.232328	0.203989	ATP5G2
cg14544666	0.40562	0.314946	RASGEF1C
cg15683166	-0.224099	-0.293275	FAM24B
cg22243298	-0.202169	-0.258558	MIR1276
cg14423692	0.254075	0.238339	BCAN
cg01812146	-0.216389	-0.272804	ARHGAP29
cg12260798	0.227702	0.269896	HIST1H4F
cg20931042	0.277381	0.338588	DRD4
cg08818610	0.297504	0.277088	FAM65B
cg09379935	-0.326573	-0.218299	P2RY6
cg04611395	0.203816	0.22928	FKBP4
cg15649045	0.354409	0.236603	MUC12
cg06530441	0.258757	0.226125	CPT1B
cg09842053	-0.224843	-0.220619	XDH
cg17738521	-0.443337	-0.283902	HIVEP2
cg20424311	-0.33522	-0.200348	SCOC
cg00806239	0.25176	0.230667	TJAP1
cg09085216	0.248027	0.242325	PLEKHA6
cg15717250	-0.345712	-0.300099	UPK1B
cg15745401	-0.412985	-0.259955	P2RY6
cg09182138	0.354522	0.224625	BCAN
cg00187535	0.219213	0.230712	TRAPPC5
cg02597299	0.219609	0.236469	GLRA1
cg10416846	0.299733	0.225485	PNOC
cg24127861	0.207238	0.227953	REC8
cg18650307	0.252173	0.251683	DCAF16
cg02256089	-0.253165	-0.242043	SLC41A3
cg03489712	-0.29538	-0.202682	ZYX
cg25097946	-0.296285	-0.279299	SORBS1
cg00347757	0.446912	0.223544	GJB2
cg15974053	0.242659	0.244305	HSD17B14
cg05491854	0.280216	0.263062	FAM65B
cg06390536	0.205445	0.201014	MYO15B
cg09950681	-0.336738	-0.258357	PKP3
cg16588163	-0.289495	-0.25805	IL1RAP
cg07477928	-0.219235	-0.231607	SVEP1
cg25451194	0.350745	0.262816	AHSA2
cg07057320	0.321901	0.20758	CLDN14
cg11643442	0.298461	0.204897	SNORA38
cg03819243	-0.36736	-0.206572	PLCD1
cg16530498	0.222937	0.249365	HSD17B14
cg22378817	0.282274	0.20551	HOXC4
cg10575547	-0.421326	-0.23932	TRERF1
cg15599832	-0.241496	-0.354453	OSMR
cg14550985	-0.338933	-0.213104	RIN1
cg11844042	-0.24219	-0.227551	TMEM154
cg16138158	0.248648	0.22441	C12orf65
cg18143701	0.228341	0.267417	TBL1XR1
cg23463608	0.288549	0.23861	GNG7
cg21950166	-0.366117	-0.238278	SFN
cg21801176	-0.38545	-0.214583	CCR6
cg22705929	0.292315	0.202767	YPEL4
cg06720467	-0.34964	-0.208712	SFN
cg21348173	-0.325989	-0.21454	PYY
cg13178597	0.243329	0.20003	RGS17
cg24864241	0.372664	0.258513	PLEKHA6
cg20992002	-0.300428	-0.286782	PKP3
cg02872476	-0.232672	-0.272292	DBNDD1
cg07698121	0.395438	0.32296	KIAA0182
cg19414598	0.214085	0.284185	DMC1
cg18696900	0.322235	0.277947	FERMT2
cg16167060	-0.289863	-0.264473	SH3BP4
cg01291854	-0.26551	-0.255196	ELK3
