# Supplementary material for: Integrative Analysis Reveals Comprehensive Altered Metabolic Genes Linking with Tumor Epigenetics Modification in Pan-Cancer
Source: Biomed Res Int. 2019 Nov 7;2019:6706354. doi: 10.1155/2019/6706354 (PMC6881592; doi:10.1155/2019/6706354)
Supplement: Supplementary Materials — Supplementary Table 1: the number of sample information and differential expression genes for 11 different cancer types and 5 GEO data projects. Supplementary Table 2: the differential expression gene list and its fold change in 11 cancer types compared with normal samples. Supplementary Table 3: the metabolic genes and the differential expression of metabolic genes. Supplementary Table 4: the function annotations of MDEGs. Supplementary Table 5: the critical different expression genes related to epigenetic modification in the specific types of cancer. Supplementary Table 6: the genes with different expression and methylation influenced by DNMT3B expression. Supplementary Table 7: gene ontology analysis of differential expression and methylation genes. Supplementary Table 8: the correlation between expression and methylation of specific genes. Supplementary Table 9: the oncogene/tumor suppressor mutation frequency and the sample size with mutation across cancer types. Supplementary Table 10: the differential expression MDEGs in mutated samples compared with non-mutated samples across cancer types. Supplementary Table 11: the pathway enrichment analysis in each mutation group. Supplementary Figure 1: relationships among metabolic pathways, cancer types, and oncogene/suppressor gene mutations. [file 6706354.f1.zip › 6706354.f1/Supplementary Table7.xlsx]

## Sheet: BRCA
Table 7 Gene ontology analysis of different expression and methylation genes(P<0.05)
Category	Term	Count	%	PValue	Genes	List Total	Pop Hits	Pop Total	Fold Enrichment
GOTERM_BP_DIRECT	GO:0009952~anterior/posterior pattern specification	7	4.57516	3.76417e-05	ACVR2A, LHX1, OTX1, VANGL2, HOXA10, NEUROD1, HOXD10	132	80	16792	11.1311
GOTERM_BP_DIRECT	GO:0007389~pattern specification process	4	2.61438	0.00131799	RAX, LHX1, SOSTDC1, ZIC1	132	28	16792	18.1732
GOTERM_BP_DIRECT	GO:0008585~female gonad development	3	1.96078	0.00593386	ZFP42, LHX8, PITX2	132	15	16792	25.4424
GOTERM_BP_DIRECT	GO:0042475~odontogenesis of dentin-containing tooth	4	2.61438	0.00905935	SOSTDC1, ANKRD11, LHX8, PITX2	132	55	16792	9.25179
GOTERM_BP_DIRECT	GO:0006366~transcription from RNA polymerase II promoter	10	6.53595	0.0191701	RAX, BACH2, LHX1, OTX1, MITF, HOXA10, AIRE, NEUROD1, ZIC1, PITX2	132	513	16792	2.47977
GOTERM_BP_DIRECT	GO:0048706~embryonic skeletal system development	3	1.96078	0.022782	ACVR2A, T, SULF1	132	30	16792	12.7212
GOTERM_BP_DIRECT	GO:2000768~positive regulation of nephron tubule epithelial cell differentiation	2	1.30719	0.0232233	PROM1, LHX1	132	3	16792	84.8081
GOTERM_BP_DIRECT	GO:0001975~response to amphetamine	3	1.96078	0.0242305	PDE1B, DRD5, HDAC9	132	31	16792	12.3109
GOTERM_BP_DIRECT	GO:0000122~negative regulation of transcription from RNA polymerase II promoter	12	7.84314	0.0253033	TAL1, T, ZBTB20, TBX15, BACH2, IKZF1, DICER1, MITF, EOMES, ZNF366, HDAC9, PITX2	132	720	16792	2.1202
GOTERM_BP_DIRECT	GO:0007498~mesoderm development	3	1.96078	0.0257158	ACVR2A, T, IKZF1	132	32	16792	11.9261
GOTERM_BP_DIRECT	GO:0007626~locomotory behavior	4	2.61438	0.0279711	TAL1, PDE1B, APBA2, GPRC5B	132	84	16792	6.05772
GOTERM_BP_DIRECT	GO:0032100~positive regulation of appetite	2	1.30719	0.0308448	NPY, GHSR	132	4	16792	63.6061
GOTERM_BP_DIRECT	GO:0021549~cerebellum development	3	1.96078	0.0336714	CDK5R1, LHX1, NEUROD1	132	37	16792	10.3145
GOTERM_BP_DIRECT	GO:0032387~negative regulation of intracellular transport	2	1.30719	0.0384073	MAPT, MAP1B	132	5	16792	50.8848
GOTERM_BP_DIRECT	GO:0030326~embryonic limb morphogenesis	3	1.96078	0.0388453	FRAS1, HOXA10, HOXD10	132	40	16792	9.54091
GOTERM_BP_DIRECT	GO:0010468~regulation of gene expression	4	2.61438	0.0434341	LHX1, APBA2, CDK6, CYP1A2	132	100	16792	5.08848

## Sheet: KIRC
Category	Term	Count	%	PValue	Genes	List Total	Pop Hits	Pop Total	Fold Enrichment
GOTERM_BP_DIRECT	GO:0045595~regulation of cell differentiation	2	9.52381	0.0356121	FES, RUNX3	20	32	16792	52.475
GOTERM_BP_DIRECT	GO:0043491~protein kinase B signaling	2	9.52381	0.0367054	PIK3CA, IL1B	20	33	16792	50.8848
GOTERM_BP_DIRECT	GO:0000122~negative regulation of transcription from RNA polymerase II promoter	4	19.0476	0.0455958	ZNF217, IKZF1, CXXC5, RUNX3	20	720	16792	4.66444

## Sheet: KIRP
Category	Term	Count	%	PValue	Genes	List Total	Pop Hits	Pop Total	Fold Enrichment	Bonferroni	Benjamini	FDR
GOTERM_BP_DIRECT	GO:0007165~signal transduction	21	12.3529	0.00255456	GABRD, CSNK1G2, MET, ESR1, KITLG, ITPKB, SFN, ELK3, CXXC5, TLR6, CORO1C, TNFAIP6, GRB10, CCR6, PNOC, CHRM3, CHRNA9, RIN1, HIVEP2, INPP4B, ZYX	147	1161	16792	2.0662	0.911958	0.911958	3.93535
GOTERM_BP_DIRECT	GO:0006954~inflammatory response	9	5.29412	0.0178586	TNFAIP6, HRH1, MEFV, IL18, IL1RAP, PARP4, TLR6, SPP1, S100A12	147	379	16792	2.71262	1	0.999808	24.6366
GOTERM_BP_DIRECT	GO:0048041~focal adhesion assembly	3	1.76471	0.0182834	SORBS1, FERMT2, WHAMM	147	24	16792	14.2789	1	0.997101	25.1467
GOTERM_BP_DIRECT	GO:0000122~negative regulation of transcription from RNA polymerase II promoter	13	7.64706	0.0232697	HOXB3, TBL1XR1, ZBTB20, TBX15, USP2, SQSTM1, ATF7, ESR1, UBE2I, ANKRD1, CXXC5, ZFHX3, FOXP1	147	720	16792	2.06251	1	0.996272	30.8967
GOTERM_BP_DIRECT	GO:0042094~interleukin-2 biosynthetic process	2	1.17647	0.0258592	IL18, IL1RAP	147	3	16792	76.1542	1	0.993111	33.717
GOTERM_BP_DIRECT	GO:0045214~sarcomere organization	3	1.76471	0.0261474	PRKAR1A, ANKRD1, FOXP1	147	29	16792	11.817	1	0.984931	34.0241
GOTERM_BP_DIRECT	GO:0001525~angiogenesis	6	3.52941	0.0453871	HOXB3, IL18, WASF2, PLCD1, ELK3, COL8A1	147	223	16792	3.07349	1	0.998171	51.7651
GOTERM_BP_DIRECT	GO:0007155~cell adhesion	9	5.29412	0.0473747	TNFAIP6, SVEP1, SORBS1, BCAN, KITLG, ZYX, CD151, COL8A1, SPP1	147	459	16792	2.23983	1	0.996859	53.3176

## Sheet: LUAD
Category	Term	Count	%	PValue	Genes	List Total	Pop Hits	Pop Total	Fold Enrichment	Bonferroni	Benjamini	FDR
GOTERM_BP_DIRECT	GO:2000543~positive regulation of gastrulation	2	12.5	0.00665179	OSR2, OTX2	15	8	16792	279.867	0.712933	0.712933	7.94009
GOTERM_BP_DIRECT	GO:0042476~odontogenesis	2	12.5	0.0222855	OSR2, AQP1	15	27	16792	82.9235	0.985221	0.87843	24.3743
GOTERM_BP_DIRECT	GO:0003091~renal water homeostasis	2	12.5	0.0263615	PRKAR1B, AQP1	15	32	16792	69.9667	0.993233	0.810856	28.1909

## Sheet: Δβ>0.2
Category	Term	Count	%	PValue	Genes	List Total	Pop Hits	Pop Total	Fold Enrichment	Bonferroni	Benjamini	FDR
GOTERM_BP_DIRECT	GO:0009952~anterior/posterior pattern specification	6	5.88235	6.56518e-05	HOXB3, ACVR2A, OTX1, HOXC4, HOXA10, HOXD10	90	80	16792	13.9933	0.0388159	0.0388159	0.096985
GOTERM_BP_DIRECT	GO:0000122~negative regulation of transcription from RNA polymerase II promoter	11	10.7843	0.00472969	HOXB3, TAL1, TAF3, TBX15, OSR2, IKZF1, USP2, EOMES, UBE2I, CXXC5, RUNX3	90	720	16792	2.85049	0.942661	0.760544	6.76691
GOTERM_BP_DIRECT	GO:0048704~embryonic skeletal system morphogenesis	3	2.94118	0.018126	HOXB3, OSR2, HOXD10	90	39	16792	14.3521	0.999984	0.974695	23.6885
GOTERM_BP_DIRECT	GO:0030326~embryonic limb morphogenesis	3	2.94118	0.019015	FRAS1, HOXA10, HOXD10	90	40	16792	13.9933	0.999991	0.944652	24.7034
GOTERM_BP_DIRECT	GO:0045944~positive regulation of transcription from RNA polymerase II promoter	11	10.7843	0.0345139	TAL1, ACVR2A, OSR2, IKZF1, OTX1, EOMES, HOXA10, ZIC1, APBB1, TET1, HOXD10	90	981	16792	2.09211	1	0.985533	40.4946
GOTERM_BP_DIRECT	GO:0051216~cartilage development	3	2.94118	0.039105	HOXB3, HOXC4, SULF1	90	59	16792	9.48701	1	0.981848	44.5423

## Sheet: Δβ<-0.2
Category	Term	Count	%	PValue	Genes	List Total	Pop Hits	Pop Total	Fold Enrichment	Bonferroni	Benjamini	FDR
GOTERM_BP_DIRECT	GO:0007165~signal transduction	17	17.7083	0.000313126	TRAF2, MET, ESR1, RPS6KC1, MAPK10, SFN, ELK3, TLR6, CCL7, CORO1C, TNFAIP6, RASSF6, CHRM3, CSNK1E, RIN1, INPP4B, ZYX	89	1161	16792	2.76267	0.184693	0.184693	0.466703
GOTERM_BP_DIRECT	GO:0032355~response to estradiol	4	4.16667	0.0121271	ADCYAP1R1, TFPI, ESR1, CYP1A2	89	91	16792	8.29337	0.999649	0.981269	16.6609
GOTERM_BP_DIRECT	GO:0042981~regulation of apoptotic process	5	5.20833	0.025679	TRAF2, RASSF6, MITF, RBM5, ESR1	89	213	16792	4.42897	1	0.996496	32.1983
GOTERM_BP_DIRECT	GO:0032387~negative regulation of intracellular transport	2	2.08333	0.0259328	MAPT, MAP1B	89	5	16792	75.4697	1	0.986196	32.4616
GOTERM_BP_DIRECT	GO:0030154~cell differentiation	7	7.29167	0.0343548	PRAME, ETV3L, SQSTM1, ADCYAP1R1, ELK3, SMURF1, AGR3	89	462	16792	2.8587	1	0.989524	40.6777
GOTERM_BP_DIRECT	GO:0050727~regulation of inflammatory response	3	3.125	0.0431492	ESR1, ZYX, FOXP1	89	63	16792	8.98448	1	0.991713	48.2552
GOTERM_BP_DIRECT	GO:0047497~mitochondrion transport along microtubule	2	2.08333	0.0461994	MAPT, MAP1B	89	9	16792	41.9276	1	0.987793	50.6651
GOTERM_BP_DIRECT	GO:0048245~eosinophil chemotaxis	2	2.08333	0.0461994	HRH1, CCL7	89	9	16792	41.9276	1	0.987793	50.6651
GOTERM_BP_DIRECT	GO:0006954~inflammatory response	6	6.25	0.048906	TNFAIP6, HRH1, IL18, TLR6, CCL7, SPP1	89	379	16792	2.98693	1	0.983204	52.7154
