# Supplementary material for: Integrative Analysis Reveals Comprehensive Altered Metabolic Genes Linking with Tumor Epigenetics Modification in Pan-Cancer
Source: Biomed Res Int. 2019 Nov 7;2019:6706354. doi: 10.1155/2019/6706354 (PMC6881592; doi:10.1155/2019/6706354)
Supplement: Supplementary Materials — Supplementary Table 1: the number of sample information and differential expression genes for 11 different cancer types and 5 GEO data projects. Supplementary Table 2: the differential expression gene list and its fold change in 11 cancer types compared with normal samples. Supplementary Table 3: the metabolic genes and the differential expression of metabolic genes. Supplementary Table 4: the function annotations of MDEGs. Supplementary Table 5: the critical different expression genes related to epigenetic modification in the specific types of cancer. Supplementary Table 6: the genes with different expression and methylation influenced by DNMT3B expression. Supplementary Table 7: gene ontology analysis of differential expression and methylation genes. Supplementary Table 8: the correlation between expression and methylation of specific genes. Supplementary Table 9: the oncogene/tumor suppressor mutation frequency and the sample size with mutation across cancer types. Supplementary Table 10: the differential expression MDEGs in mutated samples compared with non-mutated samples across cancer types. Supplementary Table 11: the pathway enrichment analysis in each mutation group. Supplementary Figure 1: relationships among metabolic pathways, cancer types, and oncogene/suppressor gene mutations. [file 6706354.f1.zip › 6706354.f1/Supplementary Table8.xlsx]

## Sheet: BRCA
The correlation between expression and methylation of specific genes
probe	Δβ in nor vs tum	Δβ in bottom vs top	gene	Foldchange	pValue	r	pValue
cg05661282	0.328652	0.242824	ZNF154	-2.51052	0	-0.5733	4.31179e-69
cg02938205	0.313603	0.277985	CCDC36	-4.76933	0	-0.251943	1.02731e-12
cg11417025	0.340146	-0.23328	SOSTDC1	-3.43449	5.81586e-11	-0.455529	4.54222e-41
cg17116120	0.203629	0.25169	COX4I2	-2.06691	0	-0.261441	1.31127e-13
cg06087421	0.206592	0.204764	TAL1	-3.82039	0	-0.243263	6.26468e-12
cg06363129	0.297534	-0.238874	SOSTDC1	-3.43449	5.81586e-11	-0.491091	2.09053e-48
cg03757145	0.274106	0.201277	CDKL2	-2.28953	2.50251e-08	-0.635368	4.4455e-89
cg12042659	0.231631	0.215353	ZNF132	-2.00658	0	-0.487159	1.49466e-47
cg07220448	0.29423	-0.225938	SOSTDC1	-3.43449	5.81586e-11	-0.450088	5.0766e-40
cg10168635	0.267563	-0.211469	C2orf88	-5.55411	0	-0.325659	1.18279e-20
cg14625175	0.405266	-0.212156	HOXA10	-2.7302	0	-0.253702	7.06117e-13
cg14263942	0.281991	0.226847	CDKL2	-2.28953	2.50251e-08	-0.631364	1.19174e-87
cg18868483	0.301089	-0.203349	B3GAT2	-1.54216	4.50807e-05	-0.22273	3.43954e-10
cg01454592	0.245132	0.226827	CCDC36	-4.76933	0	-0.247256	2.75046e-12
cg10344081	0.294167	0.201041	CDKL2	-2.28953	2.50251e-08	-0.639672	1.22803e-90
cg06126713	0.395028	-0.240618	SOSTDC1	-3.43449	5.81586e-11	-0.449069	7.93864e-40
cg24432073	0.20478	0.205554	CDKL2	-2.28953	2.50251e-08	-0.625186	1.73308e-85
cg02085507	0.372686	-0.326979	TRIP10	-1.54805	0	-0.205533	7.39099e-09
cg05308656	0.253266	-0.2182	ARL4C	-1.64326	6.71241e-13	-0.522736	1.05517e-55
cg11270393	0.308156	0.267048	ITPRIPL1	-5.73674	0	-0.394042	2.89778e-30
cg12506930	0.323833	0.202261	ZNF154	-2.51052	0	-0.570878	2.1367e-68
cg07519235	0.459351	-0.281031	GPRC5B	-2.5035	0	-0.499363	3.06274e-50
cg21113446	0.215296	-0.244273	PPP2R2B	-3.10098	0	-0.333327	1.28568e-21
cg02324432	0.253122	-0.222064	KLHL2	-1.79165	0	-0.238554	1.62358e-11
cg04203238	0.274658	-0.202118	PROM1	-1.68571	0.000897428	-0.644587	1.89712e-92
cg04243822	0.216055	-0.260308	C1QTNF1	-3.30512	0	-0.226306	1.7591e-10
cg00680551	0.424494	-0.240439	NCALD	-3.00007	0	-0.370355	1.14174e-26
cg27049766	0.32279	0.206811	ZNF154	-2.51052	0	-0.617564	6.93127e-83
cg08816590	0.288288	0.222595	PDE1B	-3.70157	0	-0.30695	2.04851e-18
cg14988503	0.210715	0.259051	CDKL2	-2.28953	2.50251e-08	-0.583568	4.19449e-72
cg18236571	0.263708	-0.207269	PABPC4L	-1.69422	2.53753e-09	-0.484833	4.72729e-47
cg18085435	-0.207952	0.205613	ATP8B1	1.70061	8.58847e-08	-0.561305	1.05016e-65
cg01062470	-0.264898	-0.241233	KIF24	2.80429	0	-0.304288	4.14166e-18
cg04567302	-0.254038	0.278937	SLC44A4	5.45789	0	-0.660701	1.25934e-98
cg16702815	-0.324586	0.226832	AGR3	5.08664	3.09464e-12	-0.697242	3.66158e-114
cg10173620	-0.292474	0.210102	ABHD2	1.92033	0.000667183	-0.365006	6.74851e-26
cg11819637	-0.262981	0.275228	THPO	3.88522	1.36012e-06	-0.673283	1.0073e-103
cg08960448	-0.330953	0.229206	SEPT12	5.27739	7.66617e-05	-0.300535	1.10378e-17
cg27530053	-0.203534	0.228398	FAM83E	3.85875	8.11177e-09	-0.458	1.49618e-41
cg23631538	-0.3347	0.235517	DENND2D	1.5783	8.49543e-13	-0.437176	1.31398e-37
cg12633764	-0.295314	0.213765	MAPT	1.80431	4.72046e-05	-0.725342	8.26534e-128

## Sheet: KIRC
probe	Δβ in nor vs tum	Δβ in bottom vs top	gene	Foldchange	pValue	r	pValue
cg27026192	0.214365	0.246922	KIFC3	-1.57694	0	-0.36061	2.71784e-11
cg02993070	0.296156	0.203624	FERMT2	-1.58269	3.77476e-15	-0.264134	1.59148e-06
cg02852670	0.260053	0.238612	KLHL33	-3.21637	0	-0.259211	2.51737e-06

## Sheet: KIRP
probe	Δβ in nor vs tum	Δβ in bottom vs top	gene	Foldchange	pValue	r	pValue
cg11800117	0.293577	0.220318	C11orf75	-1.50718	3.06469e-05	-0.267451	7.15922e-06
cg20962532	0.209952	0.220751	KCNJ1	-32.1899	0	-0.263189	1.01144e-05
cg11968091	0.261459	0.230348	ODZ4	-2.24539	0.000388952	-0.306572	2.259e-07
cg05227215	0.41792	0.295205	CXXC5	-2.04975	0	-0.259578	1.34925e-05
cg04858586	0.269997	0.228409	RABGAP1L	-2.15075	5.35127e-13	-0.218635	0.000265597
cg03648711	0.255349	0.275769	ODZ4	-2.24539	0.000388952	-0.278803	2.76994e-06
cg24277788	0.243307	0.203481	ACSL1	-2.44389	1.26565e-14	-0.339423	8.17494e-09
cg03883256	0.265289	0.225047	USP2	-3.63204	0	-0.218914	0.000260725
cg10416846	0.299733	0.225485	PNOC	-4.19665	2.27476e-08	-0.256884	1.66822e-05
cg24127861	0.207238	0.227953	REC8	-2.2299	0.000652676	-0.31031	1.57935e-07
cg15974053	0.242659	0.244305	HSD17B14	-2.21561	2.94165e-05	-0.731575	3.68661e-47
cg16530498	0.222937	0.249365	HSD17B14	-2.21561	2.94165e-05	-0.749625	1.14046e-50
cg19414598	0.214085	0.284185	DMC1	-1.57414	0.0104183	-0.464629	4.44204e-16
cg15731317	-0.374729	-0.236915	SYTL2	1.89521	0.000186378	-0.503453	5.1591e-19
cg00583003	-0.288956	-0.210041	SPP1	2.48373	3.63521e-06	-0.256403	1.73225e-05
cg21622977	-0.223639	-0.219513	RBPMS	1.79399	3.22022e-08	-0.495313	2.28649e-18
cg17660833	-0.538052	-0.349148	HRH1	4.61629	2.91542e-08	-0.338167	9.34948e-09
cg20306842	-0.219441	-0.265698	CREB5	7.0992	1.8434e-10	-0.408138	2.01191e-12
cg23031196	-0.317557	-0.213091	SLC38A1	1.62002	0.00034187	-0.379273	8.38013e-11
cg01944226	-0.284361	-0.241763	SLC16A3	4.39414	8.60343e-06	-0.769608	6.36459e-55
cg09182455	-0.419892	-0.240066	CORO1C	2.19156	4.00304e-11	-0.222216	0.000208919
cg01812894	-0.26035	-0.242057	ALDH1A1	2.20608	0.000791239	-0.283403	1.86237e-06
cg01942558	-0.485797	-0.261835	TNFAIP6	45.1451	1.33415e-05	-0.680083	1.51339e-38
cg09122223	-0.342156	-0.25912	IL18	2.29873	1.93784e-07	-0.249664	2.91291e-05
cg16929739	-0.38802	-0.203425	HRH1	4.61629	2.91542e-08	-0.326231	3.25114e-08
cg09727050	-0.395017	-0.258292	TNFAIP6	45.1451	1.33415e-05	-0.783611	3.61299e-58
cg07042532	-0.32291	-0.245759	CREB5	7.0992	1.8434e-10	-0.620391	1.53858e-30
cg13445177	-0.296279	-0.275621	S100A10	1.83229	4.18391e-08	-0.341407	6.60515e-09
cg14333454	-0.308226	-0.230119	SFN	11.1866	0.0347731	-0.7839	3.07992e-58
cg08778148	-0.217302	-0.206258	TFPI	2.08801	0.000219738	-0.448756	5.55031e-15
cg14578677	-0.239813	-0.208983	TLR6	2.30744	0.00780458	-0.448867	5.45527e-15
cg12669354	-0.351822	-0.247543	CD151	1.85455	1.27027e-11	-0.373657	1.6612e-10
cg00449608	-0.317899	-0.223202	GPR45	3.09342	0.00448036	-0.440117	2.0781e-14
cg26864526	-0.369523	-0.218723	HRH1	4.61629	2.91542e-08	-0.532378	1.86023e-21
cg10183885	-0.269874	-0.206272	SLC16A3	4.39414	8.60343e-06	-0.821897	1.95576e-68
cg06836480	-0.240056	-0.249661	DHRS9	9.53697	0.012336	-0.23825	6.79902e-05
cg11702866	-0.444427	-0.211351	HRH1	4.61629	2.91542e-08	-0.299024	4.58404e-07
cg06457736	-0.446225	-0.240559	HRH1	4.61629	2.91542e-08	-0.312869	1.23265e-07
cg24258705	-0.472458	-0.255052	MET	4.73226	1.74533e-08	-0.634017	3.26162e-32
cg15717250	-0.345712	-0.300099	UPK1B	4.3047	0.00422581	-0.663976	3.32981e-36
cg03489712	-0.29538	-0.202682	ZYX	1.99858	3.19373e-10	-0.220333	0.000237143
cg09950681	-0.336738	-0.258357	PKP3	2.1434	0.0473414	-0.607229	5.34337e-29
cg14550985	-0.338933	-0.213104	RIN1	5.1194	2.05777e-10	-0.685752	2.08612e-39
cg21950166	-0.366117	-0.238278	SFN	11.1866	0.0347731	-0.716063	2.30401e-44
cg06720467	-0.34964	-0.208712	SFN	11.1866	0.0347731	-0.551343	3.43466e-23
cg20992002	-0.300428	-0.286782	PKP3	2.1434	0.0473414	-0.654301	7.25982e-35
cg02872476	-0.232672	-0.272292	DBNDD1	3.12537	4.05489e-08	-0.66917	6.06925e-37

## Sheet: LIHC
probe	Δβ in nor vs tum	Δβ in bottom vs top	gene	Foldchange	pValue	r	pValue
cg21831174	0.218134	0.201546	MASP1	-2.16898	0	-0.352067	1.19053e-11
cg04951797	-0.280767	-0.273723	SGOL1	19.5239	5.49687e-07	-0.624818	2.69983e-39
cg17336139	-0.259755	-0.216316	PRAME	231.946	0.0189153	-0.367245	1.28976e-12
cg23213217	-0.248985	-0.227167	DEGS1	2.32811	2.55641e-08	-0.337856	8.58875e-11
cg11225751	-0.218785	-0.232496	PRAME	231.946	0.0189153	-0.46426	4.12323e-20
cg06442489	-0.343131	-0.228191	ZSCAN18	1.96576	0.00105791	-0.288858	3.74591e-08
cg20441902	-0.220006	-0.219152	FUT2	14.8124	0.0125269	-0.549015	6.05713e-29
cg25060890	-0.220454	-0.205176	RPS6KC1	2.58206	2.80673e-11	-0.390305	3.49561e-14
cg03368046	-0.205408	-0.213531	FAM186A	4.27693	0.000747825	-0.243113	4.20118e-06
cg23924737	-0.258959	-0.266221	MRPS23	2.82588	3.9968e-15	-0.403172	4.11343e-15
cg01999046	-0.303476	-0.216754	TRAF2	3.59974	3.9968e-15	-0.48642	3.45388e-22
cg03212674	-0.228519	-0.211531	CLK2	3.21928	7.31748e-13	-0.261154	7.25124e-07
cg02516101	-0.211346	-0.214606	CSNK1E	2.57372	4.99824e-09	-0.434728	1.43945e-17
cg07303143	-0.371621	-0.208725	KIAA1143	1.71354	2.32701e-07	-0.443304	2.78632e-18

## Sheet: LUAD
probe	Δβ in nor vs tum	Δβ in bottom vs top	gene	Foldchange	pValue	r	pValue
cg04372674	0.214314	0.244475	AQP1	-2.70913	7.09433e-14	-0.612702	3.66395e-49
cg25075794	0.226309	0.243817	AQP1	-2.70913	7.09433e-14	-0.608853	2.0855e-48
cg02571816	0.216135	-0.22233	PPP1R14A	-3.40955	0	-0.34411	2.41193e-14
