# Supplementary material for: Integrative Analysis Reveals Comprehensive Altered Metabolic Genes Linking with Tumor Epigenetics Modification in Pan-Cancer
Source: Biomed Res Int. 2019 Nov 7;2019:6706354. doi: 10.1155/2019/6706354 (PMC6881592; doi:10.1155/2019/6706354)
Supplement: Supplementary Materials — Supplementary Table 1: the number of sample information and differential expression genes for 11 different cancer types and 5 GEO data projects. Supplementary Table 2: the differential expression gene list and its fold change in 11 cancer types compared with normal samples. Supplementary Table 3: the metabolic genes and the differential expression of metabolic genes. Supplementary Table 4: the function annotations of MDEGs. Supplementary Table 5: the critical different expression genes related to epigenetic modification in the specific types of cancer. Supplementary Table 6: the genes with different expression and methylation influenced by DNMT3B expression. Supplementary Table 7: gene ontology analysis of differential expression and methylation genes. Supplementary Table 8: the correlation between expression and methylation of specific genes. Supplementary Table 9: the oncogene/tumor suppressor mutation frequency and the sample size with mutation across cancer types. Supplementary Table 10: the differential expression MDEGs in mutated samples compared with non-mutated samples across cancer types. Supplementary Table 11: the pathway enrichment analysis in each mutation group. Supplementary Figure 1: relationships among metabolic pathways, cancer types, and oncogene/suppressor gene mutations. [file 6706354.f1.zip › 6706354.f1/Supplementary Table9.xlsx]

## Sheet: Table 9-1
Table 9-1 The sample size and mutation frequency of 15 mutation driver genes in 10 cancer types from TCGA.
Cancer Type	BRCA		COAD		HNSC		KIRC		KIRP		LIHC		LUAD		LUSC		STAD		THCA
Gene_name	Sample size	Mutation Frequency	Sample size	Mutation Frequency	Sample size	Mutation Frequency	Sample size	Mutation Frequency	Sample size	Mutation Frequency	Sample size	Mutation Frequency	Sample size	Mutation Frequency	Sample size	Mutation Frequency	Sample size	Mutation Frequency	Sample size	Mutation Frequency
EGFR	26	0.027	10	0.05	69	0.14	9	0.02	4	0.014	13	0.04	40	0.17	18	0.1	38	0.1	0	0
KRAS	31	0.03	96	0.44	9	0.018	1	0.002	5	0.018	9	0.025	82	0.36	10	0.06	65	0.17	4	0.01
PIK3CA	346	0.36	32	0.15	174	0.35	20	0.04	6	0.021	20	0.05	20	0.09	106	0.6	86	0.22	2	0.005
AKT1	20	0.021	3	0.014	14	0.028	3	0.007	2	0.007	4	0.011	6	0.026	9	0.05	6	0.015	3	0.008
ARID1A	33	0.03	22	0.1	25	0.05	27	0.06	8	0.029	36	0.1	19	0.08	13	0.07	111	0.28	0	0
IDH1	17	0.018	3	0.014	11	0.022	8	0.018	3	0.011	9	0.025	6	0.026	3	0.017	12	0.03	1	0.003
TP53	307	0.32	120	0.55	363	0.72	16	0.04	8	0.029	120	0.33	106	0.46	145	0.81	193	0.49	4	0.01
NF1	57	0.06	11	0.05	15	0.03	12	0.027	6	0.021	20	0.05	29	0.13	27	0.15	36	0.09	3	0.008
PIK3R1	27	0.028	10	0.05	10	0.02	2	0.004	2	0.007	6	0.016	5	0.022	4	0.022	17	0.04	1	0.003
PTEN	90	0.09	15	0.07	31	0.06	23	0.05	7	0.025	24	0.07	7	0.03	32	0.18	47	0.12	6	0.015
ATRX	22	0.023	7	0.03	24	0.05	13	0.029	0	0	8	0.022	16	0.07	15	0.08	29	0.07	2	0.005
APC	23	0.024	160	0.73	24	0.05	51	0.11	4	0.014	15	0.04	12	0.05	8	0.04	60	0.15	3	0.008
KMT2D	28	0.029	12	0.05	85	0.17	21	0.05	14	0.05	22	0.06	21	0.09	38	0.21	72	0.18	0	0
KMT2C	88	0.09	11	0.05	55	0.11	26	0.06	21	0.08	29	0.08	46	0.2	33	0.19	65	0.17	4	0.01
MYC	210	0.22	14	0.06	67	0.13	4	0.009	0	0	67	0.18	21	0.09	17	0.1	52	0.13	1	0.003

## Sheet: BRCA
Mutations of PIK3CA, TP53 and MYC in BRCA samples from TCGA.
studyID	sample Id	Altered	PIK3CA	TP53	MYC
brca_tcga	TCGA-AR-A1AR-01	1	0	1	0
brca_tcga	TCGA-BH-A1EO-01	0	0	0	0
brca_tcga	TCGA-BH-A1ES-01	0	0	0	0
brca_tcga	TCGA-BH-A1ET-01	1	1	0	0
brca_tcga	TCGA-BH-A1EU-01	1	1	0	0
brca_tcga	TCGA-BH-A1EV-01	0	0	0	0
brca_tcga	TCGA-BH-A1EW-01	0	0	0	0
brca_tcga	TCGA-BH-A1F0-01	1	0	1	0
brca_tcga	TCGA-C8-A1HF-01	1	1	1	0
brca_tcga	TCGA-C8-A1HG-01	1	0	1	1
brca_tcga	TCGA-C8-A1HI-01	0	0	0	0
brca_tcga	TCGA-C8-A1HL-01	0	0	0	0
brca_tcga	TCGA-C8-A1HM-01	1	0	1	0
brca_tcga	TCGA-C8-A1HN-01	0	0	0	0
brca_tcga	TCGA-E2-A14N-01	1	0	1	1
brca_tcga	TCGA-E2-A15I-01	0	0	0	0
brca_tcga	TCGA-A2-A1FV-01	0	0	0	0
brca_tcga	TCGA-A2-A1FW-01	1	0	0	1
brca_tcga	TCGA-A2-A1FX-01	0	0	0	0
brca_tcga	TCGA-A2-A1G0-01	1	1	0	0
brca_tcga	TCGA-A2-A1G1-01	1	0	1	0
brca_tcga	TCGA-A2-A1G4-01	0	0	0	0
brca_tcga	TCGA-A2-A1G6-01	0	0	0	0
brca_tcga	TCGA-A7-A13G-01	0	0	0	0
brca_tcga	TCGA-AO-A1KO-01	0	0	0	0
brca_tcga	TCGA-AO-A1KP-01	1	0	0	1
brca_tcga	TCGA-AO-A1KS-01	1	0	1	1
brca_tcga	TCGA-AO-A1KT-01	1	0	0	1
brca_tcga	TCGA-AQ-A1H2-01	1	1	0	0
brca_tcga	TCGA-AQ-A1H3-01	0	0	0	0
brca_tcga	TCGA-B6-A1KC-01	0	0	0	0
brca_tcga	TCGA-B6-A1KF-01	1	0	1	0
brca_tcga	TCGA-B6-A1KN-01	1	0	1	1
brca_tcga	TCGA-BH-A1EN-01	1	0	0	1
brca_tcga	TCGA-BH-A1EX-01	0	0	0	0
brca_tcga	TCGA-BH-A1EY-01	1	0	1	1
brca_tcga	TCGA-BH-A1F2-01	1	0	1	1
brca_tcga	TCGA-BH-A1F5-01	0	0	0	0
brca_tcga	TCGA-BH-A1F6-01	1	0	1	0
brca_tcga	TCGA-BH-A1F8-01	1	1	0	0
brca_tcga	TCGA-BH-A1FC-01	1	0	1	0
brca_tcga	TCGA-BH-A1FD-01	1	0	1	1
brca_tcga	TCGA-BH-A1FE-01	1	1	1	1
brca_tcga	TCGA-BH-A1FG-01	1	0	0	1
brca_tcga	TCGA-BH-A1FH-01	0	0	0	0
brca_tcga	TCGA-BH-A1FJ-01	0	0	0	0
brca_tcga	TCGA-BH-A1FL-01	0	0	0	0
brca_tcga	TCGA-BH-A1FM-01	0	0	0	0
brca_tcga	TCGA-BH-A1FN-01	1	0	1	1
brca_tcga	TCGA-BH-A1FR-01	0	0	0	0
brca_tcga	TCGA-C8-A1HE-01	1	1	0	0
brca_tcga	TCGA-C8-A1HJ-01	1	0	1	0
brca_tcga	TCGA-C8-A1HK-01	1	0	1	0
brca_tcga	TCGA-C8-A1HO-01	0	0	0	0
brca_tcga	TCGA-D8-A1J8-01	1	1	0	0
brca_tcga	TCGA-D8-A1J9-01	1	0	1	0
brca_tcga	TCGA-D8-A1JA-01	0	0	0	0
brca_tcga	TCGA-D8-A1JB-01	0	0	0	0
brca_tcga	TCGA-D8-A1JC-01	0	0	0	0
brca_tcga	TCGA-D8-A1JD-01	1	1	0	0
brca_tcga	TCGA-D8-A1JE-01	1	1	0	0
brca_tcga	TCGA-D8-A1JF-01	1	1	1	0
brca_tcga	TCGA-D8-A1JG-01	1	1	1	0
brca_tcga	TCGA-D8-A1JH-01	1	1	0	0
brca_tcga	TCGA-D8-A1JI-01	0	0	0	0
brca_tcga	TCGA-D8-A1JK-01	1	1	1	0
brca_tcga	TCGA-D8-A1JL-01	1	0	1	0
brca_tcga	TCGA-D8-A1JM-01	1	0	1	0
brca_tcga	TCGA-D8-A1JN-01	1	1	0	0
brca_tcga	TCGA-D8-A1JP-01	1	1	0	1
brca_tcga	TCGA-D8-A1JS-01	1	1	0	0
brca_tcga	TCGA-D8-A1JT-01	1	0	0	1
brca_tcga	TCGA-D8-A1JU-01	1	1	0	0
brca_tcga	TCGA-E2-A1IE-01	0	0	0	0
brca_tcga	TCGA-E2-A1IH-01	0	0	0	0
brca_tcga	TCGA-E2-A1IN-01	1	1	1	0
brca_tcga	TCGA-E2-A1L6-01	1	1	0	0
brca_tcga	TCGA-E2-A1L8-01	1	1	0	0
brca_tcga	TCGA-E2-A1L9-01	0	0	0	0
brca_tcga	TCGA-EW-A1IW-01	1	1	0	0
brca_tcga	TCGA-EW-A1IY-01	0	0	0	0
brca_tcga	TCGA-EW-A1IZ-01	1	1	0	0
brca_tcga	TCGA-EW-A1J1-01	1	1	0	0
brca_tcga	TCGA-EW-A1J2-01	1	1	0	0
brca_tcga	TCGA-EW-A1J3-01	0	0	0	0
brca_tcga	TCGA-EW-A1J5-01	1	1	0	0
brca_tcga	TCGA-EW-A1J6-01	0	0	0	0
brca_tcga	TCGA-A1-A0SB-01	0	0	0	0
brca_tcga	TCGA-A1-A0SF-01	0	0	0	0
brca_tcga	TCGA-A1-A0SG-01	0	0	0	0
brca_tcga	TCGA-A1-A0SI-01	1	1	1	0
brca_tcga	TCGA-A1-A0SN-01	0	0	0	0
brca_tcga	TCGA-A1-A0SQ-01	0	0	0	0
brca_tcga	TCGA-AO-A1KR-01	1	1	0	1
brca_tcga	TCGA-E2-A1IF-01	1	1	0	0
brca_tcga	TCGA-E2-A1IG-01	0	0	0	0
brca_tcga	TCGA-E2-A1II-01	1	0	1	1
brca_tcga	TCGA-E2-A1IJ-01	0	0	0	0
brca_tcga	TCGA-E2-A1IK-01	0	0	0	0
brca_tcga	TCGA-E2-A1IO-01	1	1	1	0
brca_tcga	TCGA-E2-A1L7-01	1	0	1	1
brca_tcga	TCGA-E2-A1LA-01	1	0	0	1
brca_tcga	TCGA-E2-A1LB-01	0	0	0	0
brca_tcga	TCGA-E2-A1LL-01	0	0	0	0
brca_tcga	TCGA-E9-A1N8-01	1	0	1	0
brca_tcga	TCGA-E9-A1NA-01	0	0	0	0
brca_tcga	TCGA-E9-A1ND-01	1	0	1	0
brca_tcga	TCGA-EW-A1IX-01	1	1	0	0
brca_tcga	TCGA-EW-A1OV-01	1	1	0	0
brca_tcga	TCGA-EW-A1OX-01	0	0	0	0
brca_tcga	TCGA-EW-A1OY-01	1	0	1	0
brca_tcga	TCGA-EW-A1OZ-01	1	1	1	0
brca_tcga	TCGA-EW-A1P0-01	1	1	0	0
brca_tcga	TCGA-EW-A1P3-01	0	0	0	0
brca_tcga	TCGA-EW-A1P4-01	1	0	1	1
brca_tcga	TCGA-EW-A1P5-01	1	1	0	0
brca_tcga	TCGA-EW-A1P6-01	0	0	0	0
brca_tcga	TCGA-EW-A1P7-01	0	0	0	0
brca_tcga	TCGA-EW-A1P8-01	0	0	0	0
brca_tcga	TCGA-EW-A1PA-01	1	0	1	0
brca_tcga	TCGA-EW-A1PB-01	1	0	0	1
brca_tcga	TCGA-EW-A1PD-01	1	0	0	1
brca_tcga	TCGA-EW-A1PE-01	1	1	0	0
brca_tcga	TCGA-EW-A1PG-01	0	0	0	0
brca_tcga	TCGA-A2-A1FZ-01	1	1	0	0
brca_tcga	TCGA-BH-A1FU-01	1	0	1	1
brca_tcga	TCGA-D8-A1X5-01	1	0	1	0
brca_tcga	TCGA-D8-A1XA-01	1	0	1	0
brca_tcga	TCGA-D8-A1XB-01	0	0	0	0
brca_tcga	TCGA-D8-A1XC-01	0	0	0	0
brca_tcga	TCGA-D8-A1XF-01	0	0	0	0
brca_tcga	TCGA-D8-A1XG-01	0	0	0	0
brca_tcga	TCGA-E2-A1IL-01	1	1	0	0
brca_tcga	TCGA-E2-A1IU-01	0	0	0	0
brca_tcga	TCGA-E2-A1LH-01	1	0	1	1
brca_tcga	TCGA-E2-A1LK-01	1	0	1	1
brca_tcga	TCGA-E9-A1N5-01	1	1	1	0
brca_tcga	TCGA-E9-A1N9-01	1	0	1	1
brca_tcga	TCGA-E9-A1NF-01	1	0	1	0
brca_tcga	TCGA-E9-A1NH-01	1	1	0	0
brca_tcga	TCGA-E9-A1NI-01	1	1	0	0
brca_tcga	TCGA-E9-A1R2-01	0	0	0	0
brca_tcga	TCGA-E9-A1R4-01	1	1	0	0
brca_tcga	TCGA-E9-A1R6-01	0	0	0	0
brca_tcga	TCGA-E9-A1RA-01	1	1	0	0
brca_tcga	TCGA-E9-A1RG-01	0	0	0	0
brca_tcga	TCGA-EW-A1P1-01	1	0	0	1
brca_tcga	TCGA-AQ-A0Y5-01	1	1	0	0
brca_tcga	TCGA-B6-A1KI-01	1	1	0	0
brca_tcga	TCGA-BH-A201-01	0	0	0	0
brca_tcga	TCGA-BH-A202-01	1	1	1	1
brca_tcga	TCGA-D8-A1JJ-01	1	1	1	0
brca_tcga	TCGA-D8-A1X6-01	0	0	0	0
brca_tcga	TCGA-D8-A1X7-01	0	0	0	0
brca_tcga	TCGA-D8-A1X8-01	0	0	0	0
brca_tcga	TCGA-D8-A1XJ-01	1	0	1	1
brca_tcga	TCGA-D8-A1XK-01	1	1	0	0
brca_tcga	TCGA-D8-A1XL-01	1	1	1	0
brca_tcga	TCGA-D8-A1XM-01	1	1	0	0
brca_tcga	TCGA-D8-A1XO-01	1	1	0	0
brca_tcga	TCGA-D8-A1XQ-01	1	1	1	1
brca_tcga	TCGA-D8-A1XR-01	0	0	0	0
brca_tcga	TCGA-D8-A1XS-01	1	1	0	1
brca_tcga	TCGA-D8-A1XT-01	1	1	1	0
brca_tcga	TCGA-D8-A1XU-01	0	0	0	0
brca_tcga	TCGA-D8-A1XV-01	0	0	0	0
brca_tcga	TCGA-D8-A1XW-01	1	0	1	1
brca_tcga	TCGA-D8-A1XY-01	1	1	0	0
brca_tcga	TCGA-D8-A1XZ-01	1	0	1	1
brca_tcga	TCGA-D8-A1Y0-01	0	0	0	0
brca_tcga	TCGA-D8-A1Y1-01	1	1	0	0
brca_tcga	TCGA-E2-A1LG-01	1	0	1	1
brca_tcga	TCGA-E9-A1N4-01	0	0	0	0
brca_tcga	TCGA-E9-A1NE-01	0	0	0	0
brca_tcga	TCGA-E9-A1NG-01	1	1	0	0
brca_tcga	TCGA-E9-A1R3-01	1	1	0	0
brca_tcga	TCGA-E9-A1R5-01	1	1	0	0
brca_tcga	TCGA-E9-A1R7-01	0	0	0	0
brca_tcga	TCGA-EW-A1PH-01	1	0	1	0
brca_tcga	TCGA-AC-A23E-01	1	1	0	0
brca_tcga	TCGA-AC-A23H-01	1	1	0	0
brca_tcga	TCGA-BH-A204-01	0	0	0	0
brca_tcga	TCGA-BH-A208-01	1	1	1	0
brca_tcga	TCGA-BH-A209-01	1	0	0	1
brca_tcga	TCGA-D8-A1X9-01	0	0	0	0
brca_tcga	TCGA-D8-A1Y2-01	1	1	0	1
brca_tcga	TCGA-D8-A1Y3-01	1	0	1	0
brca_tcga	TCGA-E2-A1LI-01	0	0	0	0
brca_tcga	TCGA-E9-A1N3-01	0	0	0	0
brca_tcga	TCGA-E9-A1NC-01	1	0	0	1
brca_tcga	TCGA-E9-A1RB-01	1	0	1	0
brca_tcga	TCGA-E9-A1RC-01	1	1	0	0
brca_tcga	TCGA-E9-A1RD-01	1	1	0	0
brca_tcga	TCGA-E9-A1RE-01	1	1	0	0
brca_tcga	TCGA-E9-A1RF-01	0	0	0	0
brca_tcga	TCGA-E9-A226-01	1	1	0	0
brca_tcga	TCGA-E9-A227-01	1	1	0	0
brca_tcga	TCGA-E9-A228-01	0	0	0	0
brca_tcga	TCGA-E9-A229-01	1	1	0	0
brca_tcga	TCGA-E9-A22A-01	0	0	0	0
brca_tcga	TCGA-E9-A22B-01	1	0	0	1
brca_tcga	TCGA-E9-A22D-01	0	0	0	0
brca_tcga	TCGA-E9-A22E-01	0	0	0	0
brca_tcga	TCGA-E9-A22G-01	0	0	0	0
brca_tcga	TCGA-E9-A22H-01	0	0	0	0
brca_tcga	TCGA-A2-A25B-01	0	0	0	0
brca_tcga	TCGA-A2-A25C-01	1	1	0	0
brca_tcga	TCGA-A2-A25E-01	0	0	0	0
brca_tcga	TCGA-A2-A25F-01	0	0	0	0
brca_tcga	TCGA-A7-A26E-01	1	1	0	0
brca_tcga	TCGA-A7-A26F-01	1	0	1	0
brca_tcga	TCGA-A7-A26G-01	1	0	1	0
brca_tcga	TCGA-A7-A26H-01	1	1	1	0
brca_tcga	TCGA-A7-A26I-01	1	0	1	0
brca_tcga	TCGA-A7-A26J-01	0	0	0	0
brca_tcga	TCGA-AC-A23C-01	1	1	1	0
brca_tcga	TCGA-AR-A24H-01	1	0	0	1
brca_tcga	TCGA-AR-A24K-01	1	1	1	0
brca_tcga	TCGA-AR-A24L-01	0	0	0	0
brca_tcga	TCGA-AR-A24M-01	1	1	0	0
brca_tcga	TCGA-AR-A24N-01	1	0	0	1
brca_tcga	TCGA-AR-A24O-01	1	1	0	0
brca_tcga	TCGA-AR-A24P-01	1	0	1	0
brca_tcga	TCGA-AR-A24Q-01	1	0	0	1
brca_tcga	TCGA-AR-A24R-01	0	0	0	0
brca_tcga	TCGA-AR-A24S-01	1	1	1	0
brca_tcga	TCGA-AR-A24T-01	1	1	1	0
brca_tcga	TCGA-AR-A24U-01	1	0	0	1
brca_tcga	TCGA-AR-A24V-01	1	0	0	1
brca_tcga	TCGA-AR-A24W-01	0	0	0	0
brca_tcga	TCGA-AR-A24X-01	0	0	0	0
brca_tcga	TCGA-AR-A24Z-01	1	0	0	1
brca_tcga	TCGA-AR-A250-01	0	0	0	0
brca_tcga	TCGA-AR-A251-01	1	0	1	1
brca_tcga	TCGA-AR-A252-01	0	0	0	0
brca_tcga	TCGA-AR-A254-01	1	0	1	0
brca_tcga	TCGA-AR-A255-01	1	1	0	0
brca_tcga	TCGA-AR-A256-01	1	0	1	1
brca_tcga	TCGA-BH-A203-01	1	1	1	0
brca_tcga	TCGA-C8-A278-01	1	1	1	1
brca_tcga	TCGA-C8-A27A-01	1	0	1	1
brca_tcga	TCGA-C8-A27B-01	1	0	1	1
brca_tcga	TCGA-E9-A1QZ-01	0	0	0	0
brca_tcga	TCGA-E9-A1RH-01	1	0	1	1
brca_tcga	TCGA-E9-A1RI-01	1	1	0	0
brca_tcga	TCGA-E9-A243-01	1	0	1	0
brca_tcga	TCGA-E9-A244-01	1	1	1	0
brca_tcga	TCGA-E9-A247-01	0	0	0	0
brca_tcga	TCGA-E9-A248-01	1	0	1	0
brca_tcga	TCGA-E9-A249-01	1	1	0	0
brca_tcga	TCGA-E9-A24A-01	0	0	0	0
brca_tcga	TCGA-A2-A259-01	0	0	0	0
brca_tcga	TCGA-A2-A25A-01	1	1	0	0
brca_tcga	TCGA-A2-A25D-01	1	1	0	0
brca_tcga	TCGA-BH-A28Q-01	0	0	0	0
brca_tcga	TCGA-C8-A26V-01	1	1	1	0
brca_tcga	TCGA-C8-A26W-01	1	1	1	0
brca_tcga	TCGA-C8-A26X-01	1	0	1	0
brca_tcga	TCGA-C8-A26Y-01	1	1	0	0
brca_tcga	TCGA-C8-A26Z-01	0	0	0	0
brca_tcga	TCGA-C8-A273-01	0	0	0	0
brca_tcga	TCGA-C8-A274-01	1	1	0	0
brca_tcga	TCGA-C8-A275-01	1	0	1	0
brca_tcga	TCGA-D8-A27E-01	0	0	0	0
brca_tcga	TCGA-D8-A27F-01	1	0	1	1
brca_tcga	TCGA-D8-A27G-01	1	1	0	0
brca_tcga	TCGA-D8-A27H-01	1	1	0	1
brca_tcga	TCGA-D8-A27I-01	0	0	0	0
brca_tcga	TCGA-D8-A27K-01	1	1	0	0
brca_tcga	TCGA-D8-A27L-01	1	1	0	0
brca_tcga	TCGA-D8-A27M-01	1	0	1	1
brca_tcga	TCGA-D8-A27N-01	1	1	1	1
brca_tcga	TCGA-D8-A27P-01	1	1	0	0
brca_tcga	TCGA-D8-A27R-01	0	0	0	0
brca_tcga	TCGA-D8-A27T-01	1	1	0	0
brca_tcga	TCGA-D8-A27W-01	1	0	0	1
brca_tcga	TCGA-E9-A1R0-01	1	1	0	0
brca_tcga	TCGA-E9-A245-01	0	0	0	0
brca_tcga	TCGA-E9-A295-01	1	1	0	0
brca_tcga	TCGA-GI-A2C8-01	1	0	1	0
brca_tcga	TCGA-AC-A2B8-01	1	1	0	0
brca_tcga	TCGA-AC-A2FB-01	0	0	0	0
brca_tcga	TCGA-AC-A2FF-01	0	0	0	0
brca_tcga	TCGA-AC-A2FG-01	0	0	0	0
brca_tcga	TCGA-D8-A27V-01	0	0	0	0
brca_tcga	TCGA-EW-A2FS-01	0	0	0	0
brca_tcga	TCGA-EW-A2FV-01	1	1	0	1
brca_tcga	TCGA-EW-A2FW-01	0	0	0	0
brca_tcga	TCGA-AC-A2FK-01	0	0	0	0
brca_tcga	TCGA-AC-A2FO-01	1	1	0	0
brca_tcga	TCGA-AR-A2LE-01	0	0	0	0
brca_tcga	TCGA-AR-A2LK-01	1	1	0	0
brca_tcga	TCGA-AR-A2LL-01	0	0	0	0
brca_tcga	TCGA-AR-A2LM-01	1	1	0	0
brca_tcga	TCGA-E9-A2JS-01	0	0	0	0
brca_tcga	TCGA-GM-A2DD-01	1	1	1	0
brca_tcga	TCGA-GM-A2DF-01	1	0	1	0
brca_tcga	TCGA-GM-A2DH-01	1	1	1	0
brca_tcga	TCGA-GM-A2DK-01	0	0	0	0
brca_tcga	TCGA-GM-A2DM-01	0	0	0	0
brca_tcga	TCGA-GM-A2DN-01	0	0	0	0
brca_tcga	TCGA-AC-A2QH-01	1	0	1	1
brca_tcga	TCGA-AR-A2LH-01	0	0	0	0
brca_tcga	TCGA-AR-A2LN-01	0	0	0	0
brca_tcga	TCGA-AR-A2LO-01	0	0	0	0
brca_tcga	TCGA-AR-A2LQ-01	0	0	0	0
brca_tcga	TCGA-AR-A2LR-01	1	0	1	0
brca_tcga	TCGA-B6-A2IU-01	0	0	0	0
brca_tcga	TCGA-BH-A2L8-01	1	1	0	0
brca_tcga	TCGA-E9-A2JT-01	0	0	0	0
brca_tcga	TCGA-GM-A2D9-01	1	1	0	0
brca_tcga	TCGA-GM-A2DA-01	0	0	0	0
brca_tcga	TCGA-GM-A2DB-01	1	0	1	0
brca_tcga	TCGA-GM-A2DC-01	1	0	0	1
brca_tcga	TCGA-GM-A2DI-01	1	1	1	0
brca_tcga	TCGA-GM-A2DL-01	1	0	1	0
brca_tcga	TCGA-GM-A2DO-01	0	0	0	0
brca_tcga	TCGA-HN-A2NL-01	0	0	0	0
brca_tcga	TCGA-AC-A2FE-01	0	0	0	0
brca_tcga	TCGA-AC-A2FM-01	0	0	0	0
brca_tcga	TCGA-AC-A2QI-01	1	1	0	0
brca_tcga	TCGA-AC-A2QJ-01	0	0	0	0
brca_tcga	TCGA-AC-A3BB-01	0	0	0	0
brca_tcga	TCGA-AR-A2LJ-01	1	1	0	0
brca_tcga	TCGA-BH-A0B6-01	1	1	0	0
brca_tcga	TCGA-E2-A1LE-01	1	0	1	1
brca_tcga	TCGA-E2-A2P5-01	1	1	1	1
brca_tcga	TCGA-E2-A2P6-01	0	0	0	0
brca_tcga	TCGA-A2-A3KC-01	1	1	0	0
brca_tcga	TCGA-A2-A3KD-01	0	0	0	0
brca_tcga	TCGA-A7-A3IZ-01	0	0	0	0
brca_tcga	TCGA-A7-A3J0-01	0	0	0	0
brca_tcga	TCGA-A7-A3J1-01	1	1	0	0
brca_tcga	TCGA-AC-A23G-01	0	0	0	0
brca_tcga	TCGA-AC-A3HN-01	0	0	0	0
brca_tcga	TCGA-C8-A3M8-01	1	1	0	0
brca_tcga	TCGA-E2-A3DX-01	0	0	0	0
brca_tcga	TCGA-E9-A3HO-01	0	0	0	0
brca_tcga	TCGA-A7-A2KD-01	1	0	1	1
brca_tcga	TCGA-A7-A3IY-01	0	0	0	0
brca_tcga	TCGA-AC-A2BK-01	0	0	0	0
brca_tcga	TCGA-AC-A2BM-01	0	0	0	0
brca_tcga	TCGA-AC-A3OD-01	1	1	1	0
brca_tcga	TCGA-B6-A0I1-01	1	0	0	1
brca_tcga	TCGA-C8-A3M7-01	1	1	0	0
brca_tcga	TCGA-E9-A3Q9-01	0	0	0	0
brca_tcga	TCGA-EW-A1PC-01	1	1	1	0
brca_tcga	TCGA-EW-A2FR-01	1	0	1	0
brca_tcga	TCGA-GI-A2C9-01	1	0	1	0
brca_tcga	TCGA-GM-A3NY-01	1	1	0	0
brca_tcga	TCGA-A2-A0CK-01	0	0	0	0
brca_tcga	TCGA-A2-A0CO-01	0	0	0	0
brca_tcga	TCGA-A2-A0CR-01	1	1	0	0
brca_tcga	TCGA-A7-A13H-01	0	0	0	0
brca_tcga	TCGA-A7-A3RF-01	1	0	1	0
brca_tcga	TCGA-AC-A3EH-01	0	0	0	0
brca_tcga	TCGA-AC-A3TM-01	1	1	0	0
brca_tcga	TCGA-AC-A3TN-01	1	1	0	0
brca_tcga	TCGA-AC-A3W5-01	1	0	1	0
brca_tcga	TCGA-AC-A3W6-01	1	1	0	0
brca_tcga	TCGA-AC-A3W7-01	1	1	0	0
brca_tcga	TCGA-AR-A1AM-01	0	0	0	0
brca_tcga	TCGA-BH-A28O-01	0	0	0	0
brca_tcga	TCGA-E2-A14U-01	1	1	0	0
brca_tcga	TCGA-E9-A3QA-01	1	0	0	1
brca_tcga	TCGA-EW-A3U0-01	1	1	1	1
brca_tcga	TCGA-GM-A3NW-01	1	1	0	0
brca_tcga	TCGA-A2-A0EP-01	0	0	0	0
brca_tcga	TCGA-A2-A3XS-01	1	0	1	0
brca_tcga	TCGA-A2-A3XT-01	1	0	1	0
brca_tcga	TCGA-A2-A3XU-01	0	0	0	0
brca_tcga	TCGA-AC-A3QP-01	1	0	0	1
brca_tcga	TCGA-AC-A3YJ-01	1	1	0	0
brca_tcga	TCGA-E9-A3X8-01	0	0	0	0
brca_tcga	TCGA-GM-A3XL-01	1	0	1	0
brca_tcga	TCGA-GM-A3XN-01	1	1	0	0
brca_tcga	TCGA-JL-A3YX-01	1	1	0	0
brca_tcga	TCGA-A2-A3XV-01	1	0	1	0
brca_tcga	TCGA-A2-A3XW-01	0	0	0	0
brca_tcga	TCGA-A2-A3XX-01	1	0	1	0
brca_tcga	TCGA-A2-A3XY-01	1	1	1	0
brca_tcga	TCGA-A2-A3XZ-01	0	0	0	0
brca_tcga	TCGA-A2-A3Y0-01	1	0	1	1
brca_tcga	TCGA-AC-A3YI-01	1	0	0	1
brca_tcga	TCGA-B6-A3ZX-01	1	0	1	1
brca_tcga	TCGA-B6-A400-01	1	0	1	0
brca_tcga	TCGA-B6-A401-01	1	1	1	0
brca_tcga	TCGA-B6-A402-01	1	0	1	1
brca_tcga	TCGA-B6-A40B-01	1	1	0	0
brca_tcga	TCGA-B6-A40C-01	0	0	0	0
brca_tcga	TCGA-D8-A3Z6-01	1	1	0	0
brca_tcga	TCGA-JL-A3YW-01	1	0	1	0
brca_tcga	TCGA-A7-A425-01	1	1	0	0
brca_tcga	TCGA-A7-A426-01	0	0	0	0
brca_tcga	TCGA-B6-A408-01	1	1	0	1
brca_tcga	TCGA-B6-A409-01	1	0	1	1
brca_tcga	TCGA-BH-A42T-01	1	1	0	0
brca_tcga	TCGA-BH-A42U-01	0	0	0	0
brca_tcga	TCGA-BH-A42V-01	1	1	0	1
brca_tcga	TCGA-D8-A3Z5-01	0	0	0	0
brca_tcga	TCGA-EW-A3E8-01	1	1	0	0
brca_tcga	TCGA-EW-A423-01	0	0	0	0
brca_tcga	TCGA-GM-A3XG-01	0	0	0	0
brca_tcga	TCGA-LL-A440-01	0	0	0	0
brca_tcga	TCGA-LL-A441-01	0	0	0	0
brca_tcga	TCGA-A2-A4RW-01	0	0	0	0
brca_tcga	TCGA-A2-A4RX-01	0	0	0	0
brca_tcga	TCGA-A2-A4RY-01	1	1	0	0
brca_tcga	TCGA-A2-A4S0-01	0	0	0	0
brca_tcga	TCGA-A2-A4S1-01	1	0	1	0
brca_tcga	TCGA-A2-A4S2-01	1	1	0	0
brca_tcga	TCGA-A2-A4S3-01	1	0	1	0
brca_tcga	TCGA-A7-A4SA-01	1	0	1	0
brca_tcga	TCGA-A7-A4SB-01	1	1	0	0
brca_tcga	TCGA-A7-A4SD-01	1	0	1	0
brca_tcga	TCGA-A7-A4SE-01	1	0	1	1
brca_tcga	TCGA-A7-A4SF-01	1	1	0	0
brca_tcga	TCGA-AQ-A54N-01	1	0	1	1
brca_tcga	TCGA-AQ-A54O-01	1	1	0	0
brca_tcga	TCGA-D8-A4Z1-01	1	0	0	1
brca_tcga	TCGA-E9-A54X-01	0	0	0	0
brca_tcga	TCGA-E9-A54Y-01	1	0	0	1
brca_tcga	TCGA-GM-A4E0-01	0	0	0	0
brca_tcga	TCGA-LL-A50Y-01	1	1	0	0
brca_tcga	TCGA-LQ-A4E4-01	1	1	0	0
brca_tcga	TCGA-MS-A51U-01	1	1	0	0
brca_tcga	TCGA-A7-A56D-01	1	0	1	0
brca_tcga	TCGA-AC-A5EI-01	0	0	0	0
brca_tcga	TCGA-AR-A5QM-01	1	1	0	0
brca_tcga	TCGA-BH-A5IZ-01	1	0	1	0
brca_tcga	TCGA-BH-A5J0-01	1	1	1	0
brca_tcga	TCGA-E9-A5FK-01	0	0	0	0
brca_tcga	TCGA-E9-A5FL-01	1	0	1	1
brca_tcga	TCGA-HN-A2OB-01	1	1	0	0
brca_tcga	TCGA-OK-A5Q2-01	1	1	0	0
brca_tcga	TCGA-OL-A5D6-01	1	1	1	0
brca_tcga	TCGA-OL-A5D7-01	1	0	1	1
brca_tcga	TCGA-OL-A5D8-01	1	0	0	1
brca_tcga	TCGA-OL-A5DA-01	1	1	0	0
brca_tcga	TCGA-PE-A5DC-01	1	0	0	1
brca_tcga	TCGA-PE-A5DD-01	1	1	0	0
brca_tcga	TCGA-PE-A5DE-01	1	1	1	0
brca_tcga	TCGA-A7-A5ZV-01	1	0	1	0
brca_tcga	TCGA-AC-A5EH-01	1	1	1	0
brca_tcga	TCGA-AC-A5XU-01	1	0	1	1
brca_tcga	TCGA-AR-A5QN-01	0	0	0	0
brca_tcga	TCGA-AR-A5QP-01	1	1	0	0
brca_tcga	TCGA-AR-A5QQ-01	1	0	1	0
brca_tcga	TCGA-E9-A5UO-01	0	0	0	0
brca_tcga	TCGA-E9-A5UP-01	0	0	0	0
brca_tcga	TCGA-GM-A5PV-01	0	0	0	0
brca_tcga	TCGA-GM-A5PX-01	0	0	0	0
brca_tcga	TCGA-LL-A5YM-01	1	0	0	1
brca_tcga	TCGA-LL-A5YN-01	1	1	0	1
brca_tcga	TCGA-LL-A5YO-01	1	0	1	0
brca_tcga	TCGA-LL-A5YP-01	1	0	1	1
brca_tcga	TCGA-OL-A5RU-01	0	0	0	0
brca_tcga	TCGA-OL-A5RV-01	0	0	0	0
brca_tcga	TCGA-OL-A5RW-01	1	1	1	1
brca_tcga	TCGA-OL-A5RX-01	1	1	0	0
brca_tcga	TCGA-OL-A5RY-01	1	0	1	0
brca_tcga	TCGA-OL-A5RZ-01	0	0	0	0
brca_tcga	TCGA-OL-A5S0-01	1	1	0	1
brca_tcga	TCGA-A7-A5ZW-01	1	1	0	0
brca_tcga	TCGA-A7-A5ZX-01	0	0	0	0
brca_tcga	TCGA-AC-A5XS-01	1	1	0	0
brca_tcga	TCGA-AC-A62X-01	1	0	1	0
brca_tcga	TCGA-AC-A62Y-01	0	0	0	0
brca_tcga	TCGA-E2-A56Z-01	0	0	0	0
brca_tcga	TCGA-E2-A570-01	0	0	0	0
brca_tcga	TCGA-E2-A573-01	1	0	1	0
brca_tcga	TCGA-E2-A574-01	1	1	0	0
brca_tcga	TCGA-LL-A5YL-01	0	0	0	0
brca_tcga	TCGA-OL-A66H-01	0	0	0	0
brca_tcga	TCGA-OL-A66I-01	1	0	1	1
brca_tcga	TCGA-OL-A66J-01	0	0	0	0
brca_tcga	TCGA-OL-A66K-01	0	0	0	0
brca_tcga	TCGA-A2-A0CX-01	1	0	0	1
brca_tcga	TCGA-A2-A0D0-01	1	1	1	1
brca_tcga	TCGA-A2-A0D4-01	0	0	0	0
brca_tcga	TCGA-A7-A0CD-01	0	0	0	0
brca_tcga	TCGA-A7-A0CE-01	1	0	1	0
brca_tcga	TCGA-A7-A0CG-01	1	1	0	0
brca_tcga	TCGA-A7-A0CH-01	1	1	0	0
brca_tcga	TCGA-A7-A0CJ-01	1	1	1	0
brca_tcga	TCGA-A7-A0DB-01	1	1	0	0
brca_tcga	TCGA-A7-A0DC-01	0	0	0	0
brca_tcga	TCGA-A8-A06N-01	1	0	0	1
brca_tcga	TCGA-A8-A06O-01	1	0	1	0
brca_tcga	TCGA-A8-A06P-01	1	1	0	0
brca_tcga	TCGA-A8-A06R-01	1	1	1	1
brca_tcga	TCGA-A8-A06T-01	1	0	0	1
brca_tcga	TCGA-A8-A06U-01	1	1	1	0
brca_tcga	TCGA-A8-A06X-01	1	0	1	1
brca_tcga	TCGA-A8-A06Y-01	0	0	0	0
brca_tcga	TCGA-A8-A06Z-01	1	0	1	0
brca_tcga	TCGA-A8-A076-01	0	0	0	0
brca_tcga	TCGA-A8-A079-01	1	0	1	1
brca_tcga	TCGA-A8-A07B-01	1	1	0	0
brca_tcga	TCGA-A8-A07F-01	0	0	0	0
brca_tcga	TCGA-A8-A07I-01	0	0	0	0
brca_tcga	TCGA-A8-A07J-01	0	0	0	0
brca_tcga	TCGA-A8-A07L-01	1	0	0	1
brca_tcga	TCGA-A8-A07O-01	1	0	1	1
brca_tcga	TCGA-A8-A07P-01	0	0	0	0
brca_tcga	TCGA-A8-A07W-01	1	0	1	0
brca_tcga	TCGA-A8-A07Z-01	1	1	0	0
brca_tcga	TCGA-A8-A081-01	1	1	1	0
brca_tcga	TCGA-A8-A082-01	0	0	0	0
brca_tcga	TCGA-A8-A083-01	0	0	0	0
brca_tcga	TCGA-A8-A084-01	1	1	0	0
brca_tcga	TCGA-A8-A085-01	0	0	0	0
brca_tcga	TCGA-A8-A086-01	0	0	0	0
brca_tcga	TCGA-A8-A08A-01	0	0	0	0
brca_tcga	TCGA-A8-A08B-01	1	1	0	1
brca_tcga	TCGA-A8-A08C-01	0	0	0	0
brca_tcga	TCGA-A8-A08F-01	1	0	0	1
brca_tcga	TCGA-A8-A08G-01	1	0	1	0
brca_tcga	TCGA-A8-A08H-01	0	0	0	0
brca_tcga	TCGA-A8-A08I-01	1	0	1	0
brca_tcga	TCGA-A8-A08J-01	1	0	0	1
brca_tcga	TCGA-A8-A08L-01	1	1	0	1
brca_tcga	TCGA-A8-A08P-01	1	1	0	1
brca_tcga	TCGA-A8-A08T-01	1	1	0	0
brca_tcga	TCGA-A8-A08X-01	1	0	1	1
brca_tcga	TCGA-A8-A08Z-01	1	1	0	0
brca_tcga	TCGA-A8-A090-01	0	0	0	0
brca_tcga	TCGA-A8-A091-01	0	0	0	0
brca_tcga	TCGA-A8-A092-01	1	1	1	1
brca_tcga	TCGA-A8-A093-01	1	1	0	0
brca_tcga	TCGA-A8-A094-01	1	0	1	0
brca_tcga	TCGA-A8-A095-01	1	1	0	0
brca_tcga	TCGA-A8-A096-01	1	1	0	0
brca_tcga	TCGA-A8-A099-01	0	0	0	0
brca_tcga	TCGA-A8-A09A-01	0	0	0	0
brca_tcga	TCGA-A8-A09B-01	0	0	0	0
brca_tcga	TCGA-A8-A09C-01	1	1	0	0
brca_tcga	TCGA-A8-A09D-01	1	1	0	0
brca_tcga	TCGA-A8-A09E-01	0	0	0	0
brca_tcga	TCGA-A8-A09G-01	0	0	0	0
brca_tcga	TCGA-A8-A09K-01	1	0	0	1
brca_tcga	TCGA-A8-A09M-01	0	0	0	0
brca_tcga	TCGA-A8-A09N-01	1	0	0	1
brca_tcga	TCGA-A8-A09Q-01	1	0	0	1
brca_tcga	TCGA-A8-A09R-01	0	0	0	0
brca_tcga	TCGA-A8-A09T-01	0	0	0	0
brca_tcga	TCGA-A8-A09W-01	1	0	0	1
brca_tcga	TCGA-A8-A09X-01	1	0	1	0
brca_tcga	TCGA-A8-A09Z-01	0	0	0	0
brca_tcga	TCGA-A8-A0A1-01	1	1	0	0
brca_tcga	TCGA-A8-A0A4-01	0	0	0	0
brca_tcga	TCGA-A8-A0A7-01	1	1	0	1
brca_tcga	TCGA-A8-A0A9-01	1	1	0	0
brca_tcga	TCGA-AN-A03X-01	1	1	0	0
brca_tcga	TCGA-AN-A03Y-01	1	1	0	0
brca_tcga	TCGA-AN-A049-01	1	1	0	0
brca_tcga	TCGA-AN-A0AJ-01	1	1	1	1
brca_tcga	TCGA-AN-A0AK-01	1	1	0	1
brca_tcga	TCGA-AN-A0AL-01	1	0	1	0
brca_tcga	TCGA-AN-A0AR-01	1	0	1	0
brca_tcga	TCGA-AN-A0AS-01	1	0	1	1
brca_tcga	TCGA-AN-A0FJ-01	1	0	1	1
brca_tcga	TCGA-AN-A0FV-01	1	0	1	0
brca_tcga	TCGA-AO-A03O-01	1	0	1	1
brca_tcga	TCGA-AO-A03P-01	0	0	0	0
brca_tcga	TCGA-BH-A0AY-01	0	0	0	0
brca_tcga	TCGA-BH-A0B4-01	0	0	0	0
brca_tcga	TCGA-BH-A0BV-01	1	1	0	0
brca_tcga	TCGA-BH-A0DZ-01	1	0	1	0
brca_tcga	TCGA-A2-A04P-01	1	1	1	1
brca_tcga	TCGA-A2-A04Q-01	1	0	0	1
brca_tcga	TCGA-A2-A04T-01	1	1	1	1
brca_tcga	TCGA-A2-A04V-01	1	1	0	1
brca_tcga	TCGA-A2-A04X-01	0	0	0	0
brca_tcga	TCGA-A2-A04Y-01	1	0	0	1
brca_tcga	TCGA-A2-A0CM-01	1	0	1	1
brca_tcga	TCGA-A2-A0CP-01	1	1	0	1
brca_tcga	TCGA-A2-A0CQ-01	0	0	0	0
brca_tcga	TCGA-A2-A0CU-01	1	0	1	1
brca_tcga	TCGA-A2-A0D1-01	1	1	1	1
brca_tcga	TCGA-A2-A0D2-01	0	0	0	0
brca_tcga	TCGA-A2-A0EM-01	1	1	0	0
brca_tcga	TCGA-A2-A0EO-01	1	1	0	0
brca_tcga	TCGA-A2-A0EQ-01	1	1	1	0
brca_tcga	TCGA-A2-A0ER-01	0	0	0	0
brca_tcga	TCGA-A2-A0ET-01	0	0	0	0
brca_tcga	TCGA-A2-A0EV-01	1	1	0	0
brca_tcga	TCGA-A2-A0EX-01	1	1	0	1
brca_tcga	TCGA-A2-A0EY-01	1	1	1	0
brca_tcga	TCGA-A8-A06Q-01	1	1	1	0
brca_tcga	TCGA-A8-A07E-01	0	0	0	0
brca_tcga	TCGA-A8-A07G-01	1	1	0	0
brca_tcga	TCGA-A8-A07R-01	1	1	1	1
brca_tcga	TCGA-A8-A07U-01	1	0	1	0
brca_tcga	TCGA-A8-A08R-01	1	1	1	1
brca_tcga	TCGA-A8-A08S-01	1	0	0	1
brca_tcga	TCGA-A8-A097-01	1	0	1	1
brca_tcga	TCGA-A8-A09I-01	0	0	0	0
brca_tcga	TCGA-A8-A09V-01	0	0	0	0
brca_tcga	TCGA-A8-A0A2-01	0	0	0	0
brca_tcga	TCGA-A8-A0AB-01	0	0	0	0
brca_tcga	TCGA-AN-A041-01	1	0	0	1
brca_tcga	TCGA-AN-A046-01	1	1	1	0
brca_tcga	TCGA-AN-A04A-01	0	0	0	0
brca_tcga	TCGA-AN-A04C-01	1	1	0	1
brca_tcga	TCGA-AN-A04D-01	0	0	0	0
brca_tcga	TCGA-AN-A0AM-01	0	0	0	0
brca_tcga	TCGA-AN-A0AT-01	0	0	0	0
brca_tcga	TCGA-AN-A0FD-01	0	0	0	0
brca_tcga	TCGA-AN-A0FF-01	1	1	0	0
brca_tcga	TCGA-AN-A0FK-01	0	0	0	0
brca_tcga	TCGA-AN-A0FL-01	1	0	1	1
brca_tcga	TCGA-AN-A0FN-01	0	0	0	0
brca_tcga	TCGA-AN-A0FS-01	1	1	0	0
brca_tcga	TCGA-AN-A0FT-01	1	0	1	0
brca_tcga	TCGA-AN-A0FW-01	0	0	0	0
brca_tcga	TCGA-AN-A0FX-01	1	0	1	1
brca_tcga	TCGA-AN-A0FY-01	1	0	1	0
brca_tcga	TCGA-AN-A0FZ-01	0	0	0	0
brca_tcga	TCGA-AO-A03R-01	1	0	1	0
brca_tcga	TCGA-AO-A03T-01	1	0	0	1
brca_tcga	TCGA-AO-A0J2-01	1	0	1	0
brca_tcga	TCGA-AO-A0J3-01	0	0	0	0
brca_tcga	TCGA-AO-A0J4-01	1	0	0	1
brca_tcga	TCGA-AO-A0J5-01	1	1	0	0
brca_tcga	TCGA-AO-A0J6-01	1	1	1	0
brca_tcga	TCGA-AO-A0J7-01	1	1	0	0
brca_tcga	TCGA-AO-A0J8-01	0	0	0	0
brca_tcga	TCGA-AO-A0J9-01	0	0	0	0
brca_tcga	TCGA-AQ-A04J-01	1	0	1	1
brca_tcga	TCGA-B6-A0I2-01	0	0	0	0
brca_tcga	TCGA-B6-A0I5-01	1	1	0	0
brca_tcga	TCGA-B6-A0I9-01	1	0	1	0
brca_tcga	TCGA-B6-A0IA-01	0	0	0	0
brca_tcga	TCGA-B6-A0IB-01	0	0	0	0
brca_tcga	TCGA-B6-A0IC-01	1	1	0	0
brca_tcga	TCGA-B6-A0IE-01	1	1	1	0
brca_tcga	TCGA-B6-A0IG-01	1	0	0	1
brca_tcga	TCGA-B6-A0IJ-01	1	0	1	1
brca_tcga	TCGA-B6-A0IM-01	0	0	0	0
brca_tcga	TCGA-B6-A0IN-01	0	0	0	0
brca_tcga	TCGA-B6-A0IO-01	0	0	0	0
brca_tcga	TCGA-B6-A0IP-01	1	1	0	0
brca_tcga	TCGA-B6-A0IQ-01	1	0	1	0
brca_tcga	TCGA-BH-A0BD-01	1	1	0	0
brca_tcga	TCGA-BH-A0E6-01	1	0	1	0
brca_tcga	TCGA-BH-A0E7-01	0	0	0	0
brca_tcga	TCGA-BH-A0EB-01	1	1	0	0
brca_tcga	TCGA-BH-A0EE-01	1	1	0	0
brca_tcga	TCGA-BH-A0HO-01	0	0	0	0
brca_tcga	TCGA-BH-A0HQ-01	0	0	0	0
brca_tcga	TCGA-BH-A0HU-01	0	0	0	0
brca_tcga	TCGA-BH-A0HW-01	0	0	0	0
brca_tcga	TCGA-A2-A0CT-01	0	0	0	0
brca_tcga	TCGA-A2-A0EU-01	1	0	0	1
brca_tcga	TCGA-A7-A0D9-01	1	1	0	0
brca_tcga	TCGA-A8-A08O-01	1	1	0	0
brca_tcga	TCGA-A8-A0A6-01	1	1	0	0
brca_tcga	TCGA-A8-A0AD-01	0	0	0	0
brca_tcga	TCGA-AO-A03L-01	1	1	1	0
brca_tcga	TCGA-AO-A0JA-01	1	1	0	0
brca_tcga	TCGA-AO-A0JB-01	1	0	1	1
brca_tcga	TCGA-AO-A0JC-01	0	0	0	0
brca_tcga	TCGA-AO-A0JD-01	1	0	1	0
brca_tcga	TCGA-AO-A0JE-01	1	0	0	1
brca_tcga	TCGA-AO-A0JF-01	1	1	0	0
brca_tcga	TCGA-AO-A0JI-01	0	0	0	0
brca_tcga	TCGA-AO-A0JJ-01	0	0	0	0
brca_tcga	TCGA-AO-A0JL-01	1	0	1	1
brca_tcga	TCGA-AO-A0JM-01	0	0	0	0
brca_tcga	TCGA-B6-A0IK-01	1	1	1	1
brca_tcga	TCGA-B6-A0RE-01	1	0	1	0
brca_tcga	TCGA-B6-A0RG-01	1	1	0	1
brca_tcga	TCGA-B6-A0RI-01	0	0	0	0
brca_tcga	TCGA-BH-A0AW-01	1	0	1	0
brca_tcga	TCGA-BH-A0B3-01	1	0	1	1
brca_tcga	TCGA-BH-A0B9-01	1	0	1	0
brca_tcga	TCGA-BH-A0BA-01	1	1	0	0
brca_tcga	TCGA-BH-A0BJ-01	1	1	0	0
brca_tcga	TCGA-BH-A0BM-01	1	1	0	0
brca_tcga	TCGA-BH-A0C0-01	1	0	1	1
brca_tcga	TCGA-BH-A0DK-01	1	1	0	0
brca_tcga	TCGA-BH-A0DP-01	1	1	0	0
brca_tcga	TCGA-BH-A0DS-01	1	0	0	1
brca_tcga	TCGA-BH-A0E0-01	1	0	1	0
brca_tcga	TCGA-BH-A0E1-01	0	0	0	0
brca_tcga	TCGA-BH-A0E2-01	0	0	0	0
brca_tcga	TCGA-BH-A0GY-01	1	1	1	1
brca_tcga	TCGA-BH-A0GZ-01	0	0	0	0
brca_tcga	TCGA-BH-A0H0-01	0	0	0	0
brca_tcga	TCGA-BH-A0H6-01	1	0	0	1
brca_tcga	TCGA-BH-A0H7-01	1	0	1	0
brca_tcga	TCGA-BH-A0H9-01	1	1	0	1
brca_tcga	TCGA-BH-A0HB-01	0	0	0	0
brca_tcga	TCGA-BH-A0HK-01	0	0	0	0
brca_tcga	TCGA-BH-A0HX-01	1	0	1	1
brca_tcga	TCGA-BH-A0HY-01	1	0	1	0
brca_tcga	TCGA-A1-A0SE-01	0	0	0	0
brca_tcga	TCGA-A1-A0SH-01	1	1	0	0
brca_tcga	TCGA-A1-A0SJ-01	0	0	0	0
brca_tcga	TCGA-A1-A0SK-01	1	0	1	0
brca_tcga	TCGA-A1-A0SM-01	0	0	0	0
brca_tcga	TCGA-A1-A0SP-01	1	0	1	0
brca_tcga	TCGA-A2-A0EN-01	1	1	0	0
brca_tcga	TCGA-A2-A0ST-01	0	0	0	0
brca_tcga	TCGA-A2-A0SU-01	0	0	0	0
brca_tcga	TCGA-A2-A0SV-01	1	0	1	0
brca_tcga	TCGA-A2-A0SW-01	1	0	1	0
brca_tcga	TCGA-A2-A0SX-01	1	0	1	0
brca_tcga	TCGA-A2-A0SY-01	1	1	0	0
brca_tcga	TCGA-A2-A0T0-01	1	0	0	1
brca_tcga	TCGA-A2-A0T1-01	1	0	1	0
brca_tcga	TCGA-A2-A0T2-01	1	0	1	0
brca_tcga	TCGA-A2-A0T4-01	1	1	0	0
brca_tcga	TCGA-A2-A0T5-01	0	0	0	0
brca_tcga	TCGA-A2-A0T6-01	0	0	0	0
brca_tcga	TCGA-A2-A0T7-01	1	1	0	0
brca_tcga	TCGA-A8-A075-01	1	1	1	1
brca_tcga	TCGA-AR-A0TX-01	1	0	1	0
brca_tcga	TCGA-B6-A0RN-01	1	1	0	0
brca_tcga	TCGA-B6-A0RO-01	1	1	0	0
brca_tcga	TCGA-B6-A0RP-01	0	0	0	0
brca_tcga	TCGA-B6-A0RT-01	1	0	1	1
brca_tcga	TCGA-B6-A0RU-01	1	0	1	1
brca_tcga	TCGA-B6-A0RV-01	0	0	0	0
brca_tcga	TCGA-BH-A0BC-01	1	1	1	0
brca_tcga	TCGA-BH-A0DH-01	0	0	0	0
brca_tcga	TCGA-BH-A0DQ-01	0	0	0	0
brca_tcga	TCGA-BH-A0HI-01	1	1	0	0
brca_tcga	TCGA-BH-A0HP-01	0	0	0	0
brca_tcga	TCGA-BH-A0RX-01	1	0	1	0
brca_tcga	TCGA-A2-A04R-01	0	0	0	0
brca_tcga	TCGA-A2-A0YC-01	1	1	0	0
brca_tcga	TCGA-A2-A0YD-01	0	0	0	0
brca_tcga	TCGA-A2-A0YE-01	1	0	1	0
brca_tcga	TCGA-A2-A0YF-01	0	0	0	0
brca_tcga	TCGA-A2-A0YG-01	1	1	1	0
brca_tcga	TCGA-A2-A0YH-01	1	1	1	1
brca_tcga	TCGA-A2-A0YJ-01	1	0	1	0
brca_tcga	TCGA-A2-A0YK-01	1	1	0	0
brca_tcga	TCGA-A2-A0YL-01	1	1	0	0
brca_tcga	TCGA-A2-A0YM-01	1	0	1	0
brca_tcga	TCGA-A2-A0YT-01	1	1	1	1
brca_tcga	TCGA-AN-A0XN-01	1	0	1	1
brca_tcga	TCGA-AN-A0XO-01	1	1	0	0
brca_tcga	TCGA-AN-A0XP-01	1	1	0	0
brca_tcga	TCGA-AN-A0XR-01	0	0	0	0
brca_tcga	TCGA-AN-A0XS-01	1	1	0	0
brca_tcga	TCGA-AN-A0XT-01	1	0	1	0
brca_tcga	TCGA-AN-A0XU-01	1	0	0	1
brca_tcga	TCGA-AN-A0XV-01	1	0	0	1
brca_tcga	TCGA-AN-A0XW-01	0	0	0	0
brca_tcga	TCGA-AR-A0U0-01	1	0	1	0
brca_tcga	TCGA-AR-A0U2-01	1	0	1	1
brca_tcga	TCGA-AR-A0U3-01	1	0	1	1
brca_tcga	TCGA-B6-A0WT-01	0	0	0	0
brca_tcga	TCGA-B6-A0WV-01	0	0	0	0
brca_tcga	TCGA-B6-A0WW-01	1	1	0	0
brca_tcga	TCGA-B6-A0WX-01	1	0	1	0
brca_tcga	TCGA-B6-A0WY-01	1	0	0	1
brca_tcga	TCGA-B6-A0WZ-01	0	0	0	0
brca_tcga	TCGA-B6-A0X1-01	1	0	1	1
brca_tcga	TCGA-B6-A0X4-01	0	0	0	0
brca_tcga	TCGA-B6-A0X5-01	1	1	0	1
brca_tcga	TCGA-BH-A0W3-01	1	1	0	0
brca_tcga	TCGA-BH-A0W4-01	0	0	0	0
brca_tcga	TCGA-BH-A0W5-01	1	1	0	0
brca_tcga	TCGA-BH-A0WA-01	1	0	1	1
brca_tcga	TCGA-A2-A0YI-01	1	1	0	0
brca_tcga	TCGA-AN-A0XL-01	1	1	0	0
brca_tcga	TCGA-AO-A03M-01	1	1	0	0
brca_tcga	TCGA-AO-A03N-01	1	1	1	0
brca_tcga	TCGA-AO-A03U-01	0	0	0	0
brca_tcga	TCGA-AO-A124-01	1	1	1	0
brca_tcga	TCGA-AO-A125-01	1	1	0	0
brca_tcga	TCGA-AO-A126-01	1	1	0	0
brca_tcga	TCGA-AO-A128-01	1	0	1	0
brca_tcga	TCGA-AO-A129-01	1	0	1	1
brca_tcga	TCGA-AO-A12B-01	0	0	0	0
brca_tcga	TCGA-AO-A12E-01	0	0	0	0
brca_tcga	TCGA-AO-A12G-01	0	0	0	0
brca_tcga	TCGA-AQ-A04H-01	1	1	1	0
brca_tcga	TCGA-AQ-A04L-01	1	0	1	0
brca_tcga	TCGA-B6-A0X7-01	1	1	0	0
brca_tcga	TCGA-E2-A105-01	1	1	0	1
brca_tcga	TCGA-E2-A107-01	0	0	0	0
brca_tcga	TCGA-E2-A108-01	1	0	1	1
brca_tcga	TCGA-E2-A109-01	1	0	0	1
brca_tcga	TCGA-E2-A10B-01	1	1	0	0
brca_tcga	TCGA-E2-A10C-01	1	1	0	0
brca_tcga	TCGA-E2-A10E-01	0	0	0	0
brca_tcga	TCGA-E2-A10F-01	1	1	0	0
brca_tcga	TCGA-A1-A0SD-01	0	0	0	0
brca_tcga	TCGA-A2-A04N-01	1	1	0	0
brca_tcga	TCGA-A2-A04U-01	1	0	1	1
brca_tcga	TCGA-A2-A04W-01	1	1	1	0
brca_tcga	TCGA-A2-A0CL-01	0	0	0	0
brca_tcga	TCGA-A2-A0CS-01	1	1	0	0
brca_tcga	TCGA-A2-A0CV-01	0	0	0	0
brca_tcga	TCGA-A2-A0CW-01	1	1	1	1
brca_tcga	TCGA-A2-A0D3-01	1	1	0	0
brca_tcga	TCGA-A2-A0ES-01	0	0	0	0
brca_tcga	TCGA-A2-A0EW-01	1	1	0	0
brca_tcga	TCGA-A2-A0T3-01	0	0	0	0
brca_tcga	TCGA-A7-A0DA-01	1	0	1	1
brca_tcga	TCGA-AO-A03V-01	1	0	1	0
brca_tcga	TCGA-AO-A12A-01	1	1	0	0
brca_tcga	TCGA-AO-A12D-01	1	0	1	0
brca_tcga	TCGA-AO-A12F-01	0	0	0	0
brca_tcga	TCGA-AO-A12H-01	0	0	0	0
brca_tcga	TCGA-AR-A0TS-01	1	1	1	1
brca_tcga	TCGA-AR-A0TY-01	1	0	0	1
brca_tcga	TCGA-AR-A0U1-01	1	1	1	1
brca_tcga	TCGA-B6-A0IH-01	0	0	0	0
brca_tcga	TCGA-B6-A0RH-01	1	1	1	0
brca_tcga	TCGA-B6-A0RQ-01	1	1	0	0
brca_tcga	TCGA-B6-A0WS-01	0	0	0	0
brca_tcga	TCGA-B6-A0X0-01	0	0	0	0
brca_tcga	TCGA-BH-A0AV-01	0	0	0	0
brca_tcga	TCGA-BH-A0B0-01	1	1	1	0
brca_tcga	TCGA-BH-A0B7-01	1	0	1	1
brca_tcga	TCGA-BH-A0BG-01	1	0	1	1
brca_tcga	TCGA-BH-A0BL-01	1	0	1	0
brca_tcga	TCGA-BH-A0BP-01	1	0	1	0
brca_tcga	TCGA-BH-A0BQ-01	0	0	0	0
brca_tcga	TCGA-BH-A0BR-01	1	1	1	0
brca_tcga	TCGA-BH-A0BW-01	1	0	1	1
brca_tcga	TCGA-BH-A0C7-01	0	0	0	0
brca_tcga	TCGA-BH-A0DE-01	1	1	0	0
brca_tcga	TCGA-BH-A0DL-01	1	1	1	0
brca_tcga	TCGA-BH-A0DX-01	1	1	0	0
brca_tcga	TCGA-BH-A0E9-01	0	0	0	0
brca_tcga	TCGA-BH-A0EA-01	1	1	0	0
brca_tcga	TCGA-BH-A0EI-01	0	0	0	0
brca_tcga	TCGA-BH-A0H5-01	0	0	0	0
brca_tcga	TCGA-BH-A0W7-01	1	1	0	0
brca_tcga	TCGA-C8-A12K-01	1	1	1	1
brca_tcga	TCGA-C8-A12L-01	1	1	1	0
brca_tcga	TCGA-C8-A12M-01	0	0	0	0
brca_tcga	TCGA-C8-A12N-01	1	1	0	1
brca_tcga	TCGA-C8-A12O-01	1	0	1	0
brca_tcga	TCGA-C8-A12P-01	1	1	1	1
brca_tcga	TCGA-C8-A12Q-01	1	0	1	0
brca_tcga	TCGA-C8-A12T-01	1	1	1	0
brca_tcga	TCGA-C8-A12U-01	1	1	0	1
brca_tcga	TCGA-C8-A12V-01	0	0	0	0
brca_tcga	TCGA-C8-A12W-01	1	0	1	0
brca_tcga	TCGA-C8-A12X-01	0	0	0	0
brca_tcga	TCGA-C8-A12Z-01	1	0	1	1
brca_tcga	TCGA-C8-A130-01	1	1	1	1
brca_tcga	TCGA-C8-A131-01	1	1	1	1
brca_tcga	TCGA-C8-A132-01	0	0	0	0
brca_tcga	TCGA-C8-A134-01	1	0	1	1
brca_tcga	TCGA-C8-A135-01	1	0	1	0
brca_tcga	TCGA-C8-A137-01	1	0	0	1
brca_tcga	TCGA-C8-A138-01	1	0	1	1
brca_tcga	TCGA-D8-A13Y-01	0	0	0	0
brca_tcga	TCGA-D8-A13Z-01	1	0	1	0
brca_tcga	TCGA-D8-A140-01	0	0	0	0
brca_tcga	TCGA-D8-A141-01	0	0	0	0
brca_tcga	TCGA-D8-A142-01	1	0	1	0
brca_tcga	TCGA-D8-A143-01	1	1	0	0
brca_tcga	TCGA-D8-A145-01	0	0	0	0
brca_tcga	TCGA-D8-A146-01	1	1	0	0
brca_tcga	TCGA-D8-A147-01	1	0	1	0
brca_tcga	TCGA-E2-A10A-01	0	0	0	0
brca_tcga	TCGA-E2-A14O-01	0	0	0	0
brca_tcga	TCGA-E2-A14R-01	1	0	1	1
brca_tcga	TCGA-E2-A14T-01	1	0	0	1
brca_tcga	TCGA-E2-A14X-01	1	0	1	0
brca_tcga	TCGA-E2-A14Z-01	0	0	0	0
brca_tcga	TCGA-E2-A154-01	1	1	0	0
brca_tcga	TCGA-E2-A159-01	1	0	1	0
brca_tcga	TCGA-E2-A15D-01	0	0	0	0
brca_tcga	TCGA-E2-A15F-01	0	0	0	0
brca_tcga	TCGA-E2-A15O-01	0	0	0	0
brca_tcga	TCGA-E2-A15P-01	1	1	0	0
brca_tcga	TCGA-E2-A15R-01	0	0	0	0
brca_tcga	TCGA-E2-A15S-01	1	0	0	1
brca_tcga	TCGA-E2-A15T-01	0	0	0	0
brca_tcga	TCGA-AR-A1AH-01	1	0	1	0
brca_tcga	TCGA-BH-A0BO-01	1	1	0	0
brca_tcga	TCGA-BH-A0C1-01	0	0	0	0
brca_tcga	TCGA-BH-A0DO-01	1	1	0	0
brca_tcga	TCGA-BH-A0DT-01	1	1	0	0
brca_tcga	TCGA-BH-A18F-01	1	1	0	0
brca_tcga	TCGA-BH-A18G-01	0	0	0	0
brca_tcga	TCGA-BH-A18H-01	1	1	1	0
brca_tcga	TCGA-BH-A18I-01	1	1	0	0
brca_tcga	TCGA-BH-A18J-01	1	1	0	0
brca_tcga	TCGA-BH-A18K-01	0	0	0	0
brca_tcga	TCGA-BH-A18L-01	0	0	0	0
brca_tcga	TCGA-BH-A18M-01	1	0	0	1
brca_tcga	TCGA-BH-A18N-01	0	0	0	0
brca_tcga	TCGA-BH-A18P-01	0	0	0	0
brca_tcga	TCGA-BH-A18Q-01	1	0	1	1
brca_tcga	TCGA-BH-A18R-01	1	0	0	1
brca_tcga	TCGA-BH-A18S-01	0	0	0	0
brca_tcga	TCGA-BH-A18T-01	1	0	1	1
brca_tcga	TCGA-BH-A18U-01	1	1	1	1
brca_tcga	TCGA-BH-A18V-01	1	1	1	1
brca_tcga	TCGA-C8-A12Y-01	1	1	1	0
brca_tcga	TCGA-C8-A133-01	1	1	0	0
brca_tcga	TCGA-E2-A14P-01	1	1	1	0
brca_tcga	TCGA-E2-A14Q-01	0	0	0	0
brca_tcga	TCGA-E2-A14S-01	0	0	0	0
brca_tcga	TCGA-E2-A14V-01	1	1	0	0
brca_tcga	TCGA-E2-A14W-01	0	0	0	0
brca_tcga	TCGA-E2-A14Y-01	1	1	1	1
brca_tcga	TCGA-E2-A150-01	1	0	1	1
brca_tcga	TCGA-E2-A152-01	1	1	1	0
brca_tcga	TCGA-E2-A153-01	1	1	0	0
brca_tcga	TCGA-E2-A155-01	1	0	1	0
brca_tcga	TCGA-E2-A156-01	1	1	0	0
brca_tcga	TCGA-E2-A158-01	1	0	1	1
brca_tcga	TCGA-E2-A15A-01	1	0	0	1
brca_tcga	TCGA-E2-A15C-01	1	1	0	1
brca_tcga	TCGA-E2-A15E-01	1	1	1	1
brca_tcga	TCGA-E2-A15G-01	1	1	0	0
brca_tcga	TCGA-E2-A15H-01	0	0	0	0
brca_tcga	TCGA-E2-A15L-01	1	1	0	0
brca_tcga	TCGA-E2-A15M-01	1	0	1	0
brca_tcga	TCGA-A7-A13D-01	1	0	1	1
brca_tcga	TCGA-A7-A13E-01	1	0	1	0
brca_tcga	TCGA-A7-A13F-01	0	0	0	0
brca_tcga	TCGA-AR-A1AI-01	1	0	1	0
brca_tcga	TCGA-AR-A1AJ-01	1	0	1	0
brca_tcga	TCGA-AR-A1AK-01	0	0	0	0
brca_tcga	TCGA-AR-A1AL-01	1	1	0	0
brca_tcga	TCGA-AR-A1AN-01	1	1	1	0
brca_tcga	TCGA-AR-A1AO-01	1	1	0	0
brca_tcga	TCGA-AR-A1AP-01	1	0	1	0
brca_tcga	TCGA-AR-A1AQ-01	1	0	1	0
brca_tcga	TCGA-AR-A1AS-01	1	1	1	0
brca_tcga	TCGA-AR-A1AU-01	1	0	0	1
brca_tcga	TCGA-AR-A1AV-01	1	1	0	0
brca_tcga	TCGA-AR-A1AW-01	1	1	1	0
brca_tcga	TCGA-AR-A1AX-01	0	0	0	0
brca_tcga	TCGA-AR-A1AY-01	1	0	1	1
brca_tcga	TCGA-BH-A0AU-01	0	0	0	0
brca_tcga	TCGA-BH-A0AZ-01	0	0	0	0
brca_tcga	TCGA-BH-A0B5-01	1	1	0	0
brca_tcga	TCGA-BH-A0BF-01	1	1	0	0
brca_tcga	TCGA-BH-A0BS-01	0	0	0	0
brca_tcga	TCGA-BH-A0BT-01	1	1	1	0
brca_tcga	TCGA-BH-A0BZ-01	1	0	0	1
brca_tcga	TCGA-BH-A0C3-01	1	0	1	0
brca_tcga	TCGA-BH-A0DD-01	1	0	0	1
brca_tcga	TCGA-BH-A0DG-01	0	0	0	0
brca_tcga	TCGA-BH-A0DI-01	1	1	1	0
brca_tcga	TCGA-BH-A0DV-01	1	1	0	0
brca_tcga	TCGA-BH-A0H3-01	1	1	0	0
brca_tcga	TCGA-BH-A0HA-01	1	1	0	0
brca_tcga	TCGA-E2-A15J-01	0	0	0	0
brca_tcga	TCGA-E2-A15K-01	1	1	0	0
brca_tcga	TCGA-E2-A1AZ-01	1	0	0	1
brca_tcga	TCGA-E2-A1B0-01	1	0	1	1
brca_tcga	TCGA-E2-A1B1-01	0	0	0	0
brca_tcga	TCGA-E2-A1B4-01	1	1	0	0
brca_tcga	TCGA-E2-A1B5-01	0	0	0	0
brca_tcga	TCGA-E2-A1B6-01	1	0	1	0
brca_tcga	TCGA-E2-A1BC-01	1	1	0	0
brca_tcga	TCGA-E2-A1BD-01	1	1	0	0

## Sheet: COAD
Mutations of APC, TP53 and KRAS in COAD samples from TCGA.
studyID	sampleId	Altered	APC	TP53	KRAS
coadread_tcga	TCGA-A6-2674-01	1	1	1	0
coadread_tcga	TCGA-A6-2677-01	1	1	0	0
coadread_tcga	TCGA-A6-2678-01	1	0	1	0
coadread_tcga	TCGA-A6-2683-01	1	0	1	1
coadread_tcga	TCGA-AA-3514-01	0	0	0	0
coadread_tcga	TCGA-AA-3517-01	1	0	1	0
coadread_tcga	TCGA-AA-3519-01	1	1	1	0
coadread_tcga	TCGA-AA-3520-01	1	0	1	1
coadread_tcga	TCGA-AA-3521-01	1	1	0	1
coadread_tcga	TCGA-AA-3522-01	1	1	0	1
coadread_tcga	TCGA-AA-3524-01	1	0	1	0
coadread_tcga	TCGA-AA-3526-01	1	0	1	0
coadread_tcga	TCGA-AA-3527-01	1	1	0	0
coadread_tcga	TCGA-AA-3529-01	0	0	0	0
coadread_tcga	TCGA-AA-3531-01	1	1	1	0
coadread_tcga	TCGA-AA-3532-01	1	1	0	1
coadread_tcga	TCGA-AA-3534-01	0	0	0	0
coadread_tcga	TCGA-AA-3538-01	1	1	0	0
coadread_tcga	TCGA-AA-3542-01	1	1	1	0
coadread_tcga	TCGA-AA-3544-01	1	1	0	0
coadread_tcga	TCGA-AA-3548-01	1	1	0	1
coadread_tcga	TCGA-AA-3549-01	1	1	1	0
coadread_tcga	TCGA-AA-3552-01	1	1	1	0
coadread_tcga	TCGA-AA-3553-01	1	1	1	0
coadread_tcga	TCGA-AA-3555-01	1	1	0	1
coadread_tcga	TCGA-AA-3556-01	1	1	1	1
coadread_tcga	TCGA-AA-3558-01	1	1	1	1
coadread_tcga	TCGA-AA-3560-01	1	0	1	1
coadread_tcga	TCGA-AA-3561-01	1	1	1	1
coadread_tcga	TCGA-AA-3562-01	1	1	1	0
coadread_tcga	TCGA-A6-2672-01	0	0	0	0
coadread_tcga	TCGA-A6-2676-01	1	0	1	0
coadread_tcga	TCGA-AA-3516-01	0	0	0	0
coadread_tcga	TCGA-AA-3518-01	0	0	0	0
coadread_tcga	TCGA-AA-3525-01	0	0	0	0
coadread_tcga	TCGA-AA-3543-01	0	0	0	0
coadread_tcga	TCGA-AA-3554-01	1	1	0	0
coadread_tcga	TCGA-AA-A00A-01	1	1	0	1
coadread_tcga	TCGA-AA-A00D-01	1	1	1	0
coadread_tcga	TCGA-AA-A00E-01	1	0	1	0
coadread_tcga	TCGA-AA-A00F-01	1	0	1	0
coadread_tcga	TCGA-AA-A00J-01	1	1	0	0
coadread_tcga	TCGA-AA-A00K-01	1	1	0	1
coadread_tcga	TCGA-AA-A00L-01	1	1	1	0
coadread_tcga	TCGA-AA-A00Q-01	1	1	0	1
coadread_tcga	TCGA-AA-A00R-01	0	0	0	0
coadread_tcga	TCGA-AA-A00U-01	1	1	0	0
coadread_tcga	TCGA-AA-A00W-01	1	1	1	1
coadread_tcga	TCGA-AA-A00Z-01	1	1	0	0
coadread_tcga	TCGA-AA-A01F-01	1	1	1	1
coadread_tcga	TCGA-AA-A01G-01	1	0	1	1
coadread_tcga	TCGA-AA-A01Q-01	1	1	0	0
coadread_tcga	TCGA-AA-A004-01	1	0	1	0
coadread_tcga	TCGA-AA-A00N-01	1	1	0	1
coadread_tcga	TCGA-AA-A00O-01	1	1	1	0
coadread_tcga	TCGA-AA-A010-01	1	1	1	0
coadread_tcga	TCGA-AA-A017-01	1	1	0	0
coadread_tcga	TCGA-AA-A01D-01	1	0	1	0
coadread_tcga	TCGA-AA-A01I-01	1	1	0	1
coadread_tcga	TCGA-AA-A01K-01	1	1	1	1
coadread_tcga	TCGA-AA-A024-01	1	1	0	0
coadread_tcga	TCGA-AA-A029-01	1	1	0	1
coadread_tcga	TCGA-AA-A02F-01	1	1	1	0
coadread_tcga	TCGA-AA-A02H-01	1	1	1	0
coadread_tcga	TCGA-AA-A02J-01	1	1	1	0
coadread_tcga	TCGA-AA-A02W-01	1	1	1	1
coadread_tcga	TCGA-AA-3664-01	0	0	0	0
coadread_tcga	TCGA-AA-3666-01	1	1	1	0
coadread_tcga	TCGA-AA-3667-01	1	1	1	0
coadread_tcga	TCGA-AA-3672-01	1	0	0	1
coadread_tcga	TCGA-AA-3673-01	1	1	1	1
coadread_tcga	TCGA-AA-3678-01	1	1	0	0
coadread_tcga	TCGA-AA-3679-01	1	1	1	0
coadread_tcga	TCGA-AA-3680-01	1	1	0	1
coadread_tcga	TCGA-AA-3681-01	1	1	1	1
coadread_tcga	TCGA-AA-3684-01	1	1	0	0
coadread_tcga	TCGA-AA-3685-01	1	1	1	0
coadread_tcga	TCGA-AA-3688-01	1	1	0	0
coadread_tcga	TCGA-AA-3692-01	1	1	0	0
coadread_tcga	TCGA-AA-3693-01	1	1	1	0
coadread_tcga	TCGA-AA-3695-01	1	1	0	1
coadread_tcga	TCGA-AA-3696-01	1	0	0	1
coadread_tcga	TCGA-AA-3715-01	1	1	0	1
coadread_tcga	TCGA-AA-3812-01	1	1	0	0
coadread_tcga	TCGA-AA-3814-01	1	1	1	1
coadread_tcga	TCGA-AA-3818-01	1	1	0	1
coadread_tcga	TCGA-AA-3819-01	0	0	0	0
coadread_tcga	TCGA-AA-3831-01	0	0	0	0
coadread_tcga	TCGA-AA-3833-01	0	0	0	0
coadread_tcga	TCGA-AA-3837-01	1	1	0	1
coadread_tcga	TCGA-AA-3848-01	1	1	1	1
coadread_tcga	TCGA-AA-3852-01	1	1	0	1
coadread_tcga	TCGA-AA-3854-01	1	1	0	1
coadread_tcga	TCGA-AA-3856-01	1	1	1	0
coadread_tcga	TCGA-AA-3858-01	1	1	1	0
coadread_tcga	TCGA-AA-3860-01	1	1	1	0
coadread_tcga	TCGA-AA-3875-01	1	0	1	0
coadread_tcga	TCGA-A6-3807-01	1	1	1	0
coadread_tcga	TCGA-A6-3810-01	1	1	1	0
coadread_tcga	TCGA-AA-3530-01	1	1	0	1
coadread_tcga	TCGA-AA-3710-01	1	1	0	0
coadread_tcga	TCGA-AA-3811-01	1	0	1	0
coadread_tcga	TCGA-AA-3821-01	0	0	0	0
coadread_tcga	TCGA-AA-3842-01	1	0	1	1
coadread_tcga	TCGA-AA-3844-01	1	0	1	1
coadread_tcga	TCGA-AA-3845-01	1	0	0	1
coadread_tcga	TCGA-AA-3846-01	1	1	0	0
coadread_tcga	TCGA-AA-3850-01	0	0	0	0
coadread_tcga	TCGA-AA-3851-01	1	1	1	1
coadread_tcga	TCGA-AA-3855-01	1	1	0	0
coadread_tcga	TCGA-AA-3864-01	1	1	0	1
coadread_tcga	TCGA-AA-3866-01	1	1	1	0
coadread_tcga	TCGA-AA-3867-01	1	0	1	0
coadread_tcga	TCGA-AA-3869-01	1	0	1	0
coadread_tcga	TCGA-AA-3870-01	1	1	0	1
coadread_tcga	TCGA-AA-3872-01	1	1	0	0
coadread_tcga	TCGA-AA-3877-01	0	0	0	0
coadread_tcga	TCGA-AA-3930-01	1	1	1	1
coadread_tcga	TCGA-AA-3939-01	1	1	0	1
coadread_tcga	TCGA-AA-3941-01	1	1	1	1
coadread_tcga	TCGA-AA-3947-01	1	1	0	0
coadread_tcga	TCGA-AA-3949-01	1	0	1	0
coadread_tcga	TCGA-AA-3952-01	1	1	0	0
coadread_tcga	TCGA-AA-3955-01	1	0	1	0
coadread_tcga	TCGA-AA-3956-01	1	0	1	0
coadread_tcga	TCGA-AA-3971-01	0	0	0	0
coadread_tcga	TCGA-AA-3972-01	1	1	1	0
coadread_tcga	TCGA-AA-3973-01	1	1	0	0
coadread_tcga	TCGA-AA-3975-01	1	1	1	1
coadread_tcga	TCGA-AA-3976-01	1	1	1	0
coadread_tcga	TCGA-AA-3977-01	1	1	1	1
coadread_tcga	TCGA-AA-3979-01	1	1	1	1
coadread_tcga	TCGA-AA-3982-01	1	1	1	0
coadread_tcga	TCGA-AA-3984-01	1	1	0	0
coadread_tcga	TCGA-AA-3986-01	1	1	0	1
coadread_tcga	TCGA-AA-3989-01	1	1	0	0
coadread_tcga	TCGA-AA-3966-01	0	0	0	0
coadread_tcga	TCGA-AA-3994-01	1	1	0	1
coadread_tcga	TCGA-AY-4070-01	1	0	1	0
coadread_tcga	TCGA-AY-4071-01	1	1	1	0
coadread_tcga	TCGA-AA-A01P-01	0	0	0	0
coadread_tcga	TCGA-AA-A01R-01	1	1	0	1
coadread_tcga	TCGA-AA-A01S-01	1	1	1	0
coadread_tcga	TCGA-AA-A01T-01	1	1	1	0
coadread_tcga	TCGA-AA-A01V-01	1	1	0	0
coadread_tcga	TCGA-AA-A01X-01	1	0	0	1
coadread_tcga	TCGA-AA-A01Z-01	1	1	1	1
coadread_tcga	TCGA-AA-A022-01	0	0	0	0
coadread_tcga	TCGA-AA-A02O-01	1	1	0	1
coadread_tcga	TCGA-AA-A02Y-01	1	0	0	1
coadread_tcga	TCGA-AA-A03F-01	1	1	0	1
coadread_tcga	TCGA-AA-A03J-01	1	0	1	1
coadread_tcga	TCGA-AG-3901-01	1	0	0	1
coadread_tcga	TCGA-AG-3898-01	1	1	1	0
coadread_tcga	TCGA-AF-2692-01	1	1	0	1
coadread_tcga	TCGA-AG-A026-01	1	1	1	0
coadread_tcga	TCGA-AG-3882-01	1	1	1	0
coadread_tcga	TCGA-AG-3894-01	1	1	0	0
coadread_tcga	TCGA-AG-3896-01	1	1	1	1
coadread_tcga	TCGA-AF-2689-01	1	0	1	1
coadread_tcga	TCGA-AG-3909-01	1	1	1	1
coadread_tcga	TCGA-AG-A011-01	1	1	1	0
coadread_tcga	TCGA-AG-3601-01	1	1	1	0
coadread_tcga	TCGA-AG-3593-01	1	1	0	0
coadread_tcga	TCGA-AG-3587-01	1	1	1	0
coadread_tcga	TCGA-AG-3892-01	1	1	0	1
coadread_tcga	TCGA-AG-A016-01	1	0	1	0
coadread_tcga	TCGA-AG-3999-01	1	1	1	1
coadread_tcga	TCGA-AG-3611-01	1	1	1	1
coadread_tcga	TCGA-AG-A01W-01	1	1	1	1
coadread_tcga	TCGA-AG-3726-01	1	1	1	1
coadread_tcga	TCGA-AG-3598-01	1	1	1	1
coadread_tcga	TCGA-AG-3608-01	1	0	1	0
coadread_tcga	TCGA-AG-3902-01	1	1	1	1
coadread_tcga	TCGA-AF-3400-01	1	1	1	0
coadread_tcga	TCGA-AG-A032-01	1	1	1	1
coadread_tcga	TCGA-AG-3581-01	1	1	1	1
coadread_tcga	TCGA-AG-3600-01	0	0	0	0
coadread_tcga	TCGA-AG-4007-01	1	1	1	0
coadread_tcga	TCGA-AG-3890-01	1	1	1	0
coadread_tcga	TCGA-AG-A002-01	1	1	0	0
coadread_tcga	TCGA-AG-3727-01	1	1	0	1
coadread_tcga	TCGA-AG-3887-01	1	1	0	1
coadread_tcga	TCGA-AG-4015-01	1	1	1	1
coadread_tcga	TCGA-AG-A025-01	1	1	0	1
coadread_tcga	TCGA-AG-3578-01	1	0	1	0
coadread_tcga	TCGA-AG-A020-01	1	1	1	1
coadread_tcga	TCGA-AF-2691-01	1	1	1	1
coadread_tcga	TCGA-AG-A01Y-01	1	1	1	0
coadread_tcga	TCGA-AG-3881-01	1	1	0	0
coadread_tcga	TCGA-AG-A01L-01	1	1	1	0
coadread_tcga	TCGA-AG-3878-01	1	1	0	1
coadread_tcga	TCGA-AG-3582-01	0	0	0	0
coadread_tcga	TCGA-AG-3580-01	1	1	0	1
coadread_tcga	TCGA-AG-3605-01	1	1	1	1
coadread_tcga	TCGA-AG-4008-01	1	1	1	1
coadread_tcga	TCGA-AG-3612-01	1	1	1	0
coadread_tcga	TCGA-AG-A02N-01	1	1	1	1
coadread_tcga	TCGA-AG-4001-01	1	1	1	0
coadread_tcga	TCGA-AG-A00C-01	1	1	1	1
coadread_tcga	TCGA-AG-3574-01	0	0	0	0
coadread_tcga	TCGA-AG-4005-01	1	1	1	1
coadread_tcga	TCGA-AF-3913-01	1	1	1	0
coadread_tcga	TCGA-AG-3584-01	1	1	0	0
coadread_tcga	TCGA-AG-A015-01	1	1	0	1
coadread_tcga	TCGA-AG-A008-01	1	1	0	1
coadread_tcga	TCGA-AG-A02X-01	1	1	1	1
coadread_tcga	TCGA-AG-3594-01	1	1	1	1
coadread_tcga	TCGA-AG-3883-01	1	1	0	0
coadread_tcga	TCGA-AG-3609-01	1	1	1	0
coadread_tcga	TCGA-AG-A00H-01	1	0	1	1
coadread_tcga	TCGA-AG-A02G-01	1	1	0	0
coadread_tcga	TCGA-AG-3602-01	1	1	1	1
coadread_tcga	TCGA-AG-3575-01	1	0	1	1
coadread_tcga	TCGA-AG-3583-01	1	1	0	1
coadread_tcga	TCGA-AG-3893-01	1	1	1	0
coadread_tcga	TCGA-AG-A014-01	1	1	1	1
coadread_tcga	TCGA-AG-3586-01	1	1	1	1
coadread_tcga	TCGA-AG-A00Y-01	1	0	1	1
coadread_tcga	TCGA-AG-3599-01	1	1	0	1

## Sheet: HNSC
Mutations of PIK3CA, TP53 and KMT2D in HNSC samples from TCGA.
studyID	sampleId	Altered	PIK3CA	TP53	KMT2D
hnsc_tcga	TCGA-CN-6010-01	1	1	1	0
hnsc_tcga	TCGA-CN-6011-01	1	0	1	1
hnsc_tcga	TCGA-CN-6012-01	1	1	1	0
hnsc_tcga	TCGA-CN-6013-01	1	1	1	0
hnsc_tcga	TCGA-CN-6016-01	1	0	1	0
hnsc_tcga	TCGA-CN-6017-01	1	0	1	0
hnsc_tcga	TCGA-CN-6018-01	1	0	1	0
hnsc_tcga	TCGA-CN-6019-01	1	1	1	0
hnsc_tcga	TCGA-CN-6020-01	1	0	1	0
hnsc_tcga	TCGA-CN-6021-01	1	1	1	1
hnsc_tcga	TCGA-CN-6022-01	1	0	1	1
hnsc_tcga	TCGA-CN-6023-01	1	1	1	1
hnsc_tcga	TCGA-CN-6024-01	1	1	1	0
hnsc_tcga	TCGA-CQ-5323-01	1	1	0	1
hnsc_tcga	TCGA-CQ-5324-01	0	0	0	0
hnsc_tcga	TCGA-CQ-5325-01	0	0	0	0
hnsc_tcga	TCGA-CQ-5327-01	0	0	0	0
hnsc_tcga	TCGA-CQ-5329-01	1	0	1	0
hnsc_tcga	TCGA-CQ-5330-01	1	0	1	0
hnsc_tcga	TCGA-CQ-5332-01	1	0	1	0
hnsc_tcga	TCGA-CQ-5334-01	1	0	1	0
hnsc_tcga	TCGA-CV-5430-01	1	0	1	0
hnsc_tcga	TCGA-CV-5432-01	1	0	1	0
hnsc_tcga	TCGA-CV-5434-01	1	0	1	1
hnsc_tcga	TCGA-CV-5435-01	1	1	1	0
hnsc_tcga	TCGA-CV-5439-01	1	0	1	0
hnsc_tcga	TCGA-CV-5966-01	1	0	1	0
hnsc_tcga	TCGA-CV-5970-01	1	1	1	0
hnsc_tcga	TCGA-CV-5971-01	0	0	0	0
hnsc_tcga	TCGA-CV-5973-01	1	0	1	0
hnsc_tcga	TCGA-CV-5976-01	1	0	1	0
hnsc_tcga	TCGA-CV-5977-01	1	0	1	0
hnsc_tcga	TCGA-CV-5978-01	1	1	1	0
hnsc_tcga	TCGA-CV-5979-01	1	0	1	0
hnsc_tcga	TCGA-CV-6003-01	1	0	1	0
hnsc_tcga	TCGA-CV-6433-01	0	0	0	0
hnsc_tcga	TCGA-CV-6436-01	1	1	1	0
hnsc_tcga	TCGA-CV-6441-01	1	0	0	1
hnsc_tcga	TCGA-BA-5152-01	1	0	1	0
hnsc_tcga	TCGA-BA-6869-01	1	0	1	0
hnsc_tcga	TCGA-BA-6870-01	1	0	1	1
hnsc_tcga	TCGA-BA-6871-01	1	1	0	1
hnsc_tcga	TCGA-BA-6872-01	1	0	1	0
hnsc_tcga	TCGA-BA-6873-01	1	1	1	0
hnsc_tcga	TCGA-BB-4227-01	1	0	1	0
hnsc_tcga	TCGA-CN-4733-01	1	0	1	0
hnsc_tcga	TCGA-CQ-5326-01	1	0	1	0
hnsc_tcga	TCGA-CQ-5331-01	1	1	1	0
hnsc_tcga	TCGA-CR-6467-01	0	0	0	0
hnsc_tcga	TCGA-CR-6470-01	1	1	0	0
hnsc_tcga	TCGA-CR-6471-01	1	1	0	0
hnsc_tcga	TCGA-CR-6472-01	1	1	0	0
hnsc_tcga	TCGA-CR-6473-01	1	0	0	1
hnsc_tcga	TCGA-CR-6474-01	1	0	1	0
hnsc_tcga	TCGA-CR-6477-01	1	0	1	0
hnsc_tcga	TCGA-CR-6478-01	1	0	1	1
hnsc_tcga	TCGA-CR-6480-01	0	0	0	0
hnsc_tcga	TCGA-CR-6481-01	1	1	0	0
hnsc_tcga	TCGA-CR-6482-01	0	0	0	0
hnsc_tcga	TCGA-CR-6484-01	1	0	1	1
hnsc_tcga	TCGA-CR-6487-01	1	1	0	1
hnsc_tcga	TCGA-CR-6491-01	1	0	1	0
hnsc_tcga	TCGA-CR-6493-01	1	0	1	0
hnsc_tcga	TCGA-D6-6515-01	1	1	1	0
hnsc_tcga	TCGA-D6-6516-01	1	0	1	0
hnsc_tcga	TCGA-D6-6517-01	1	1	1	0
hnsc_tcga	TCGA-DQ-5624-01	1	0	1	0
hnsc_tcga	TCGA-DQ-5625-01	0	0	0	0
hnsc_tcga	TCGA-DQ-5629-01	1	1	1	0
hnsc_tcga	TCGA-DQ-5630-01	1	1	1	0
hnsc_tcga	TCGA-DQ-5631-01	1	0	1	0
hnsc_tcga	TCGA-BA-6868-01	1	0	1	0
hnsc_tcga	TCGA-CN-6988-01	1	0	1	0
hnsc_tcga	TCGA-CN-6989-01	1	1	1	0
hnsc_tcga	TCGA-CN-6992-01	1	1	1	0
hnsc_tcga	TCGA-CN-6994-01	1	1	1	0
hnsc_tcga	TCGA-CN-6996-01	1	0	1	1
hnsc_tcga	TCGA-CQ-6218-01	1	1	1	0
hnsc_tcga	TCGA-CQ-6220-01	1	1	1	0
hnsc_tcga	TCGA-CQ-6223-01	1	0	1	0
hnsc_tcga	TCGA-CQ-6224-01	1	0	1	0
hnsc_tcga	TCGA-CQ-6225-01	1	0	1	1
hnsc_tcga	TCGA-CQ-6227-01	0	0	0	0
hnsc_tcga	TCGA-CQ-6228-01	1	0	1	0
hnsc_tcga	TCGA-CQ-6229-01	1	0	1	0
hnsc_tcga	TCGA-CV-6933-01	1	1	1	0
hnsc_tcga	TCGA-CV-6934-01	1	1	1	0
hnsc_tcga	TCGA-CV-6935-01	1	1	1	0
hnsc_tcga	TCGA-CV-6936-01	1	0	1	0
hnsc_tcga	TCGA-CV-6938-01	0	0	0	0
hnsc_tcga	TCGA-CV-6939-01	0	0	0	0
hnsc_tcga	TCGA-CV-6940-01	1	0	1	0
hnsc_tcga	TCGA-CV-6941-01	1	0	1	0
hnsc_tcga	TCGA-CV-6943-01	1	0	1	0
hnsc_tcga	TCGA-CV-6945-01	1	1	1	0
hnsc_tcga	TCGA-CV-6948-01	1	1	1	0
hnsc_tcga	TCGA-CV-6950-01	1	0	1	1
hnsc_tcga	TCGA-CV-6951-01	1	0	1	0
hnsc_tcga	TCGA-CV-6952-01	1	1	1	0
hnsc_tcga	TCGA-CV-6953-01	1	0	1	0
hnsc_tcga	TCGA-CV-6954-01	0	0	0	0
hnsc_tcga	TCGA-CV-6959-01	1	0	1	0
hnsc_tcga	TCGA-CV-6961-01	1	1	0	0
hnsc_tcga	TCGA-CV-6962-01	1	0	1	0
hnsc_tcga	TCGA-D6-6823-01	1	0	1	0
hnsc_tcga	TCGA-D6-6824-01	1	1	0	0
hnsc_tcga	TCGA-D6-6825-01	1	0	1	0
hnsc_tcga	TCGA-D6-6826-01	1	0	1	0
hnsc_tcga	TCGA-D6-6827-01	0	0	0	0
hnsc_tcga	TCGA-BA-7269-01	1	0	1	0
hnsc_tcga	TCGA-CN-5370-01	1	0	1	1
hnsc_tcga	TCGA-CN-6995-01	1	1	1	0
hnsc_tcga	TCGA-CN-6997-01	1	1	1	1
hnsc_tcga	TCGA-CN-6998-01	1	1	1	0
hnsc_tcga	TCGA-CR-5247-01	1	1	0	0
hnsc_tcga	TCGA-CR-5248-01	1	1	0	0
hnsc_tcga	TCGA-CR-7364-01	1	0	1	0
hnsc_tcga	TCGA-CR-7365-01	1	0	1	0
hnsc_tcga	TCGA-CR-7367-01	1	1	0	0
hnsc_tcga	TCGA-CR-7371-01	1	1	1	0
hnsc_tcga	TCGA-CR-7372-01	1	0	1	0
hnsc_tcga	TCGA-CR-7373-01	0	0	0	0
hnsc_tcga	TCGA-CR-7374-01	1	1	1	0
hnsc_tcga	TCGA-CR-7377-01	1	0	1	0
hnsc_tcga	TCGA-CR-7379-01	1	0	1	1
hnsc_tcga	TCGA-CR-7380-01	1	0	1	0
hnsc_tcga	TCGA-CR-7385-01	1	1	0	0
hnsc_tcga	TCGA-CR-7386-01	1	0	1	0
hnsc_tcga	TCGA-CR-7388-01	1	1	1	1
hnsc_tcga	TCGA-CR-7389-01	1	0	1	1
hnsc_tcga	TCGA-CR-7390-01	1	1	1	0
hnsc_tcga	TCGA-CR-7391-01	0	0	0	0
hnsc_tcga	TCGA-CR-7392-01	0	0	0	0
hnsc_tcga	TCGA-CR-7393-01	1	0	1	0
hnsc_tcga	TCGA-CR-7394-01	1	1	1	0
hnsc_tcga	TCGA-CR-7395-01	1	1	0	0
hnsc_tcga	TCGA-CR-7397-01	1	0	1	0
hnsc_tcga	TCGA-CR-7398-01	1	0	1	0
hnsc_tcga	TCGA-CR-7399-01	1	1	1	0
hnsc_tcga	TCGA-CR-7401-01	1	1	1	0
hnsc_tcga	TCGA-CR-7402-01	1	0	1	1
hnsc_tcga	TCGA-CV-6937-01	1	0	1	0
hnsc_tcga	TCGA-CV-6942-01	1	0	1	0
hnsc_tcga	TCGA-CV-6955-01	1	1	0	0
hnsc_tcga	TCGA-CV-6956-01	1	1	1	0
hnsc_tcga	TCGA-CV-6960-01	1	1	1	0
hnsc_tcga	TCGA-CV-7089-01	1	0	1	0
hnsc_tcga	TCGA-CV-7090-01	1	0	1	0
hnsc_tcga	TCGA-CV-7091-01	1	1	1	0
hnsc_tcga	TCGA-CV-7095-01	1	0	1	0
hnsc_tcga	TCGA-CV-7097-01	1	0	1	0
hnsc_tcga	TCGA-CV-7099-01	1	0	1	0
hnsc_tcga	TCGA-CV-7100-01	1	1	0	0
hnsc_tcga	TCGA-CV-7101-01	1	1	1	0
hnsc_tcga	TCGA-CV-7102-01	1	0	1	0
hnsc_tcga	TCGA-CV-7103-01	1	1	1	0
hnsc_tcga	TCGA-CV-7104-01	1	0	1	0
hnsc_tcga	TCGA-CV-7177-01	1	1	1	0
hnsc_tcga	TCGA-CV-7178-01	1	0	1	1
hnsc_tcga	TCGA-CV-7180-01	1	0	1	0
hnsc_tcga	TCGA-CV-7183-01	1	0	0	1
hnsc_tcga	TCGA-CV-7235-01	1	0	1	0
hnsc_tcga	TCGA-CV-7236-01	1	0	1	0
hnsc_tcga	TCGA-CV-7238-01	1	0	1	0
hnsc_tcga	TCGA-CV-7242-01	1	1	1	0
hnsc_tcga	TCGA-CV-7243-01	1	0	1	0
hnsc_tcga	TCGA-CV-7245-01	1	0	1	0
hnsc_tcga	TCGA-CV-7247-01	1	0	1	0
hnsc_tcga	TCGA-CV-7248-01	1	0	1	1
hnsc_tcga	TCGA-CV-7250-01	1	1	0	0
hnsc_tcga	TCGA-CV-7252-01	1	1	1	1
hnsc_tcga	TCGA-CV-7253-01	1	1	1	0
hnsc_tcga	TCGA-CV-7254-01	1	0	1	1
hnsc_tcga	TCGA-CV-7255-01	1	0	1	0
hnsc_tcga	TCGA-CV-7261-01	1	1	0	1
hnsc_tcga	TCGA-CV-7263-01	1	0	1	0
hnsc_tcga	TCGA-CX-7082-01	1	1	1	0
hnsc_tcga	TCGA-CX-7085-01	0	0	0	0
hnsc_tcga	TCGA-CX-7219-01	1	0	1	0
hnsc_tcga	TCGA-HD-7229-01	1	0	1	0
hnsc_tcga	TCGA-BB-4217-01	0	0	0	0
hnsc_tcga	TCGA-CQ-6221-01	1	1	1	1
hnsc_tcga	TCGA-CQ-7065-01	1	0	1	0
hnsc_tcga	TCGA-CQ-7068-01	0	0	0	0
hnsc_tcga	TCGA-CR-6488-01	0	0	0	0
hnsc_tcga	TCGA-CR-6492-01	1	1	0	0
hnsc_tcga	TCGA-CV-7406-01	1	1	0	0
hnsc_tcga	TCGA-CV-7407-01	1	1	1	0
hnsc_tcga	TCGA-CV-7410-01	1	1	0	0
hnsc_tcga	TCGA-CV-7411-01	1	1	0	0
hnsc_tcga	TCGA-CV-7413-01	1	0	1	0
hnsc_tcga	TCGA-CV-7414-01	1	0	1	0
hnsc_tcga	TCGA-CV-7415-01	1	1	1	0
hnsc_tcga	TCGA-CV-7416-01	1	0	1	0
hnsc_tcga	TCGA-CV-7418-01	1	1	1	0
hnsc_tcga	TCGA-CV-7421-01	1	0	1	0
hnsc_tcga	TCGA-CV-7422-01	1	1	1	1
hnsc_tcga	TCGA-CV-7423-01	1	0	1	0
hnsc_tcga	TCGA-CV-7424-01	1	1	1	0
hnsc_tcga	TCGA-CV-7425-01	0	0	0	0
hnsc_tcga	TCGA-CV-7427-01	0	0	0	0
hnsc_tcga	TCGA-CX-7086-01	1	0	1	1
hnsc_tcga	TCGA-DQ-7588-01	1	0	1	0
hnsc_tcga	TCGA-DQ-7591-01	0	0	0	0
hnsc_tcga	TCGA-DQ-7592-01	1	0	1	0
hnsc_tcga	TCGA-H7-7774-01	1	1	0	0
hnsc_tcga	TCGA-HD-7753-01	1	0	1	0
hnsc_tcga	TCGA-HD-7754-01	1	1	0	0
hnsc_tcga	TCGA-IQ-7630-01	1	0	1	1
hnsc_tcga	TCGA-IQ-7631-01	0	0	0	0
hnsc_tcga	TCGA-IQ-7632-01	1	0	0	1
hnsc_tcga	TCGA-CR-7368-01	1	0	1	0
hnsc_tcga	TCGA-CR-7369-01	0	0	0	0
hnsc_tcga	TCGA-CR-7370-01	1	1	1	0
hnsc_tcga	TCGA-CR-7376-01	1	0	1	0
hnsc_tcga	TCGA-CR-7382-01	0	0	0	0
hnsc_tcga	TCGA-CR-7383-01	1	0	1	0
hnsc_tcga	TCGA-CR-7404-01	1	1	0	0
hnsc_tcga	TCGA-CV-7429-01	0	0	0	0
hnsc_tcga	TCGA-CV-7430-01	1	1	1	1
hnsc_tcga	TCGA-CV-7432-01	1	0	1	0
hnsc_tcga	TCGA-CV-7433-01	1	1	1	0
hnsc_tcga	TCGA-CV-7434-01	1	1	1	1
hnsc_tcga	TCGA-CV-7435-01	1	1	1	1
hnsc_tcga	TCGA-CV-7437-01	1	0	1	1
hnsc_tcga	TCGA-CV-7438-01	1	1	1	0
hnsc_tcga	TCGA-CV-7440-01	0	0	0	0
hnsc_tcga	TCGA-F7-7848-01	1	0	1	0
hnsc_tcga	TCGA-HD-7831-01	1	0	1	0
hnsc_tcga	TCGA-HD-7832-01	1	1	0	0
hnsc_tcga	TCGA-BB-7870-01	1	0	1	1
hnsc_tcga	TCGA-DQ-7593-01	1	0	0	1
hnsc_tcga	TCGA-DQ-7596-01	0	0	0	0
hnsc_tcga	TCGA-BB-8596-01	0	0	0	0
hnsc_tcga	TCGA-BB-8601-01	1	1	1	0
hnsc_tcga	TCGA-CQ-5333-01	0	0	0	0
hnsc_tcga	TCGA-CQ-7063-01	1	0	1	0
hnsc_tcga	TCGA-CQ-7064-01	1	1	1	0
hnsc_tcga	TCGA-CQ-7069-01	1	1	1	0
hnsc_tcga	TCGA-D6-8568-01	1	0	1	1
hnsc_tcga	TCGA-D6-8569-01	1	1	1	0
hnsc_tcga	TCGA-F7-8298-01	1	0	1	0
hnsc_tcga	TCGA-F7-8489-01	1	1	1	0
hnsc_tcga	TCGA-H7-8501-01	1	0	1	1
hnsc_tcga	TCGA-H7-8502-01	1	1	1	0
hnsc_tcga	TCGA-HD-8224-01	1	1	1	0
hnsc_tcga	TCGA-HD-8314-01	1	1	0	0
hnsc_tcga	TCGA-HD-8634-01	1	1	1	0
hnsc_tcga	TCGA-HD-8635-01	1	0	1	1
hnsc_tcga	TCGA-C9-A47Z-01	1	0	1	0
hnsc_tcga	TCGA-C9-A480-01	1	0	1	0
hnsc_tcga	TCGA-CN-A497-01	1	0	1	0
hnsc_tcga	TCGA-CN-A498-01	1	1	1	0
hnsc_tcga	TCGA-CN-A499-01	1	1	0	0
hnsc_tcga	TCGA-CN-A49A-01	1	1	1	0
hnsc_tcga	TCGA-CN-A49B-01	1	1	1	0
hnsc_tcga	TCGA-CN-A49C-01	0	0	0	0
hnsc_tcga	TCGA-CV-A45O-01	1	1	0	0
hnsc_tcga	TCGA-CV-A45P-01	1	0	1	0
hnsc_tcga	TCGA-CV-A45Q-01	1	0	1	0
hnsc_tcga	TCGA-CV-A45R-01	1	1	1	0
hnsc_tcga	TCGA-CV-A45T-01	0	0	0	0
hnsc_tcga	TCGA-CV-A45U-01	1	1	1	0
hnsc_tcga	TCGA-HD-A4C1-01	0	0	0	0
hnsc_tcga	TCGA-CQ-A4C6-01	1	1	1	0
hnsc_tcga	TCGA-CQ-A4C7-01	1	0	1	0
hnsc_tcga	TCGA-CQ-A4C9-01	1	0	1	0
hnsc_tcga	TCGA-CQ-A4CA-01	0	0	0	0
hnsc_tcga	TCGA-CQ-A4CB-01	1	0	1	0
hnsc_tcga	TCGA-CQ-A4CD-01	1	0	1	0
hnsc_tcga	TCGA-CV-A45V-01	1	1	0	1
hnsc_tcga	TCGA-CV-A45W-01	1	1	1	0
hnsc_tcga	TCGA-CV-A45X-01	1	0	1	0
hnsc_tcga	TCGA-CV-A45Y-01	1	0	1	0
hnsc_tcga	TCGA-CV-A45Z-01	1	0	1	1
hnsc_tcga	TCGA-CV-A460-01	1	1	1	0
hnsc_tcga	TCGA-CX-A4AQ-01	1	0	1	0
hnsc_tcga	TCGA-D6-A4Z9-01	1	0	1	0
hnsc_tcga	TCGA-D6-A4ZB-01	1	1	1	0
hnsc_tcga	TCGA-BA-A4IF-01	1	1	1	0
hnsc_tcga	TCGA-BA-A4IG-01	1	1	0	0
hnsc_tcga	TCGA-BA-A4IH-01	0	0	0	0
hnsc_tcga	TCGA-BA-A4II-01	1	1	1	0
hnsc_tcga	TCGA-CQ-A4CE-01	1	0	1	0
hnsc_tcga	TCGA-CQ-A4CG-01	1	1	0	0
hnsc_tcga	TCGA-CQ-A4CH-01	1	0	1	0
hnsc_tcga	TCGA-CQ-A4CI-01	0	0	0	0
hnsc_tcga	TCGA-CV-A461-01	1	1	1	1
hnsc_tcga	TCGA-CV-A463-01	1	0	1	0
hnsc_tcga	TCGA-CV-A464-01	1	0	1	0
hnsc_tcga	TCGA-CV-A465-01	1	0	1	0
hnsc_tcga	TCGA-CV-A468-01	1	0	1	0
hnsc_tcga	TCGA-F7-A50G-01	1	1	1	0
hnsc_tcga	TCGA-MT-A51W-01	1	0	1	0
hnsc_tcga	TCGA-MT-A51X-01	1	0	1	0
hnsc_tcga	TCGA-BB-A5HU-01	1	0	1	0
hnsc_tcga	TCGA-BB-A5HY-01	1	1	1	0
hnsc_tcga	TCGA-BB-A5HZ-01	1	0	1	0
hnsc_tcga	TCGA-CN-A63T-01	1	1	1	0
hnsc_tcga	TCGA-CN-A63V-01	0	0	0	0
hnsc_tcga	TCGA-F7-A50I-01	1	0	1	0
hnsc_tcga	TCGA-F7-A50J-01	1	1	0	0
hnsc_tcga	TCGA-F7-A61S-01	1	1	1	0
hnsc_tcga	TCGA-F7-A61V-01	1	1	1	0
hnsc_tcga	TCGA-F7-A61W-01	1	1	1	1
hnsc_tcga	TCGA-F7-A620-01	1	0	1	0
hnsc_tcga	TCGA-F7-A622-01	1	0	0	1
hnsc_tcga	TCGA-F7-A623-01	1	1	1	0
hnsc_tcga	TCGA-HD-A633-01	1	0	1	0
hnsc_tcga	TCGA-HD-A634-01	0	0	0	0
hnsc_tcga	TCGA-P3-A5Q5-01	1	1	0	0
hnsc_tcga	TCGA-P3-A5Q6-01	1	1	1	0
hnsc_tcga	TCGA-P3-A5QA-01	1	0	1	0
hnsc_tcga	TCGA-P3-A5QE-01	0	0	0	0
hnsc_tcga	TCGA-P3-A5QF-01	1	1	0	1
hnsc_tcga	TCGA-BA-A6DB-01	1	0	1	0
hnsc_tcga	TCGA-BA-A6DF-01	1	1	0	1
hnsc_tcga	TCGA-BA-A6DG-01	1	0	1	0
hnsc_tcga	TCGA-BA-A6DI-01	1	0	1	1
hnsc_tcga	TCGA-BA-A6DJ-01	0	0	0	0
hnsc_tcga	TCGA-BA-A6DL-01	1	0	1	0
hnsc_tcga	TCGA-CN-A63U-01	1	1	1	0
hnsc_tcga	TCGA-CN-A63W-01	1	0	1	0
hnsc_tcga	TCGA-CN-A63Y-01	0	0	0	0
hnsc_tcga	TCGA-CN-A640-01	1	0	1	0
hnsc_tcga	TCGA-CN-A641-01	1	0	1	0
hnsc_tcga	TCGA-CN-A642-01	0	0	0	0
hnsc_tcga	TCGA-CQ-7071-01	0	0	0	0
hnsc_tcga	TCGA-CQ-7072-01	1	0	1	0
hnsc_tcga	TCGA-F7-A624-01	1	0	1	1
hnsc_tcga	TCGA-H7-A6C4-01	1	0	1	0
hnsc_tcga	TCGA-H7-A6C5-01	1	0	1	1
hnsc_tcga	TCGA-IQ-A61E-01	1	1	1	0
hnsc_tcga	TCGA-IQ-A61G-01	1	1	1	0
hnsc_tcga	TCGA-IQ-A61H-01	1	0	1	0
hnsc_tcga	TCGA-IQ-A61I-01	0	0	0	0
hnsc_tcga	TCGA-IQ-A61J-01	1	0	1	0
hnsc_tcga	TCGA-IQ-A61K-01	1	0	1	0
hnsc_tcga	TCGA-IQ-A61L-01	1	0	1	0
hnsc_tcga	TCGA-IQ-A61O-01	1	0	1	0
hnsc_tcga	TCGA-KU-A66S-01	0	0	0	0
hnsc_tcga	TCGA-KU-A66T-01	1	0	1	0
hnsc_tcga	TCGA-MT-A67A-01	1	0	0	1
hnsc_tcga	TCGA-MT-A67D-01	1	0	0	1
hnsc_tcga	TCGA-MT-A67F-01	0	0	0	0
hnsc_tcga	TCGA-MT-A67G-01	0	0	0	0
hnsc_tcga	TCGA-QK-A64Z-01	1	1	1	0
hnsc_tcga	TCGA-QK-A652-01	1	0	1	0
hnsc_tcga	TCGA-BA-A6D8-01	1	1	1	0
hnsc_tcga	TCGA-BA-A6DA-01	1	0	1	0
hnsc_tcga	TCGA-BA-A6DD-01	1	0	1	0
hnsc_tcga	TCGA-BA-A6DE-01	1	0	1	0
hnsc_tcga	TCGA-CV-A6JD-01	1	0	1	0
hnsc_tcga	TCGA-CV-A6JE-01	1	0	1	0
hnsc_tcga	TCGA-CV-A6JM-01	1	1	1	1
hnsc_tcga	TCGA-CV-A6JN-01	1	0	1	0
hnsc_tcga	TCGA-CV-A6JT-01	1	0	1	0
hnsc_tcga	TCGA-CV-A6JU-01	1	0	1	0
hnsc_tcga	TCGA-CV-A6JY-01	1	0	1	0
hnsc_tcga	TCGA-CV-A6JZ-01	1	0	1	0
hnsc_tcga	TCGA-CV-A6K0-01	0	0	0	0
hnsc_tcga	TCGA-CV-A6K1-01	1	0	1	1
hnsc_tcga	TCGA-CV-A6K2-01	1	0	1	0
hnsc_tcga	TCGA-D6-A6EK-01	0	0	0	0
hnsc_tcga	TCGA-D6-A6EM-01	1	0	1	0
hnsc_tcga	TCGA-D6-A6EN-01	0	0	0	0
hnsc_tcga	TCGA-D6-A6EO-01	1	0	1	0
hnsc_tcga	TCGA-D6-A6EP-01	1	0	1	1
hnsc_tcga	TCGA-D6-A6EQ-01	1	0	1	0
hnsc_tcga	TCGA-D6-A6ES-01	1	1	0	1
hnsc_tcga	TCGA-HD-A6HZ-01	1	0	1	0
hnsc_tcga	TCGA-HD-A6I0-01	0	0	0	0
hnsc_tcga	TCGA-KU-A6H7-01	0	0	0	0
hnsc_tcga	TCGA-MZ-A6I9-01	1	1	0	0
hnsc_tcga	TCGA-QK-A6IF-01	0	0	0	0
hnsc_tcga	TCGA-QK-A6IG-01	1	0	1	0
hnsc_tcga	TCGA-QK-A6IH-01	1	0	1	0
hnsc_tcga	TCGA-QK-A6II-01	1	0	1	0
hnsc_tcga	TCGA-QK-A6IJ-01	1	0	1	0
hnsc_tcga	TCGA-BB-A6UM-01	0	0	0	0
hnsc_tcga	TCGA-BB-A6UO-01	1	0	1	0
hnsc_tcga	TCGA-CN-A6UY-01	0	0	0	0
hnsc_tcga	TCGA-CN-A6V1-01	1	1	0	0
hnsc_tcga	TCGA-CN-A6V3-01	1	1	1	0
hnsc_tcga	TCGA-CN-A6V6-01	1	0	0	1
hnsc_tcga	TCGA-CN-A6V7-01	1	1	0	0
hnsc_tcga	TCGA-CV-A6JO-01	1	1	0	0
hnsc_tcga	TCGA-D6-A74Q-01	1	0	1	0
hnsc_tcga	TCGA-H7-A76A-01	0	0	0	0
hnsc_tcga	TCGA-IQ-A6SG-01	1	1	1	0
hnsc_tcga	TCGA-IQ-A6SH-01	1	0	1	1
hnsc_tcga	TCGA-KU-A6H8-01	1	0	1	0
hnsc_tcga	TCGA-MT-A7BN-01	1	0	1	0
hnsc_tcga	TCGA-MZ-A5BI-01	0	0	0	0
hnsc_tcga	TCGA-MZ-A7D7-01	1	0	1	0
hnsc_tcga	TCGA-P3-A6SW-01	1	1	0	0
hnsc_tcga	TCGA-P3-A6SX-01	1	0	1	0
hnsc_tcga	TCGA-P3-A6T0-01	1	1	1	0
hnsc_tcga	TCGA-P3-A6T2-01	1	0	1	0
hnsc_tcga	TCGA-P3-A6T3-01	1	0	1	0
hnsc_tcga	TCGA-P3-A6T4-01	1	1	1	1
hnsc_tcga	TCGA-P3-A6T5-01	1	0	1	0
hnsc_tcga	TCGA-P3-A6T6-01	1	0	1	0
hnsc_tcga	TCGA-P3-A6T7-01	1	0	1	0
hnsc_tcga	TCGA-P3-A6T8-01	1	1	1	0
hnsc_tcga	TCGA-QK-A6V9-01	1	1	0	0
hnsc_tcga	TCGA-QK-A6VB-01	1	0	1	0
hnsc_tcga	TCGA-QK-A6VC-01	1	0	1	0
hnsc_tcga	TCGA-RS-A6TO-01	1	0	1	1
hnsc_tcga	TCGA-RS-A6TP-01	1	0	0	1
hnsc_tcga	TCGA-T2-A6WX-01	0	0	0	0
hnsc_tcga	TCGA-T2-A6WZ-01	1	1	1	0
hnsc_tcga	TCGA-T2-A6X0-01	0	0	0	0
hnsc_tcga	TCGA-T2-A6X2-01	0	0	0	0
hnsc_tcga	TCGA-TN-A7HI-01	1	1	0	0
hnsc_tcga	TCGA-TN-A7HJ-01	0	0	0	0
hnsc_tcga	TCGA-TN-A7HL-01	1	1	0	0
hnsc_tcga	TCGA-UF-A718-01	1	0	1	0
hnsc_tcga	TCGA-UF-A719-01	1	0	1	0
hnsc_tcga	TCGA-UF-A71A-01	1	1	1	0
hnsc_tcga	TCGA-UF-A71B-01	1	1	1	0
hnsc_tcga	TCGA-UF-A71D-01	1	0	1	0
hnsc_tcga	TCGA-UF-A71E-01	1	1	1	0
hnsc_tcga	TCGA-UF-A7J9-01	1	1	1	0
hnsc_tcga	TCGA-UF-A7JA-01	1	0	1	0
hnsc_tcga	TCGA-UF-A7JC-01	0	0	0	0
hnsc_tcga	TCGA-UF-A7JD-01	1	0	1	0
hnsc_tcga	TCGA-UF-A7JF-01	1	1	1	0
hnsc_tcga	TCGA-UF-A7JH-01	1	0	1	1
hnsc_tcga	TCGA-UF-A7JJ-01	1	0	1	0
hnsc_tcga	TCGA-UF-A7JK-01	1	1	1	0
hnsc_tcga	TCGA-UF-A7JO-01	1	1	1	0
hnsc_tcga	TCGA-UF-A7JS-01	1	0	1	0
hnsc_tcga	TCGA-UF-A7JT-01	1	0	1	1
hnsc_tcga	TCGA-UF-A7JV-01	1	1	0	0
hnsc_tcga	TCGA-UP-A6WW-01	0	0	0	0
hnsc_tcga	TCGA-WA-A7GZ-01	1	1	1	0
hnsc_tcga	TCGA-WA-A7H4-01	0	0	0	0
hnsc_tcga	TCGA-4P-AA8J-01	1	0	1	0
hnsc_tcga	TCGA-BA-A8YP-01	1	1	1	0
hnsc_tcga	TCGA-QK-A8Z7-01	1	1	1	0
hnsc_tcga	TCGA-QK-A8Z8-01	1	0	1	0
hnsc_tcga	TCGA-QK-A8Z9-01	1	0	1	0
hnsc_tcga	TCGA-QK-A8ZA-01	1	0	1	1
hnsc_tcga	TCGA-QK-A8ZB-01	1	0	1	1
hnsc_tcga	TCGA-QK-AA3J-01	1	0	1	0
hnsc_tcga	TCGA-QK-AA3K-01	1	1	1	1
hnsc_tcga	TCGA-T3-A92M-01	1	0	1	1
hnsc_tcga	TCGA-T3-A92N-01	1	0	0	1
hnsc_tcga	TCGA-BA-4074-01	1	0	1	1
hnsc_tcga	TCGA-BA-4075-01	1	0	1	1
hnsc_tcga	TCGA-BA-4076-01	1	0	1	1
hnsc_tcga	TCGA-BA-4077-01	1	1	0	1
hnsc_tcga	TCGA-BA-4078-01	1	0	1	0
hnsc_tcga	TCGA-BA-5151-01	1	0	1	0
hnsc_tcga	TCGA-BA-5153-01	0	0	0	0
hnsc_tcga	TCGA-BB-4223-01	1	1	0	0
hnsc_tcga	TCGA-BB-4224-01	1	0	1	0
hnsc_tcga	TCGA-BB-4225-01	0	0	0	0
hnsc_tcga	TCGA-BB-4228-01	0	0	0	0
hnsc_tcga	TCGA-CN-4723-01	1	1	1	0
hnsc_tcga	TCGA-CN-4725-01	1	0	1	0
hnsc_tcga	TCGA-CN-4726-01	1	0	1	0
hnsc_tcga	TCGA-CN-4727-01	1	1	1	0
hnsc_tcga	TCGA-CN-4728-01	1	0	1	0
hnsc_tcga	TCGA-CN-4729-01	1	0	1	0
hnsc_tcga	TCGA-CN-4730-01	0	0	0	0
hnsc_tcga	TCGA-CN-4731-01	1	0	1	1
hnsc_tcga	TCGA-CN-4735-01	1	1	1	1
hnsc_tcga	TCGA-CN-4736-01	1	0	1	0
hnsc_tcga	TCGA-CN-4737-01	1	0	1	1
hnsc_tcga	TCGA-CN-4740-01	1	0	1	0
hnsc_tcga	TCGA-CN-4741-01	1	1	0	1
hnsc_tcga	TCGA-CN-5355-01	1	0	1	0
hnsc_tcga	TCGA-CN-5356-01	1	0	1	1
hnsc_tcga	TCGA-CN-5359-01	1	0	1	0
hnsc_tcga	TCGA-CN-5360-01	1	1	1	0
hnsc_tcga	TCGA-CN-5363-01	1	0	1	0
hnsc_tcga	TCGA-CN-5364-01	1	1	1	0
hnsc_tcga	TCGA-CN-5365-01	1	1	1	0
hnsc_tcga	TCGA-CN-5366-01	1	0	1	0
hnsc_tcga	TCGA-CN-5367-01	1	0	1	0
hnsc_tcga	TCGA-CN-5369-01	1	0	0	1
hnsc_tcga	TCGA-CN-5373-01	1	1	1	0
hnsc_tcga	TCGA-CN-5374-01	0	0	0	0
hnsc_tcga	TCGA-BA-5149-01	1	1	0	1
hnsc_tcga	TCGA-BA-5555-01	1	1	1	0
hnsc_tcga	TCGA-BA-5556-01	0	0	0	0
hnsc_tcga	TCGA-BA-5557-01	1	1	1	0
hnsc_tcga	TCGA-BA-5558-01	1	0	1	1
hnsc_tcga	TCGA-BA-5559-01	0	0	0	0
hnsc_tcga	TCGA-CN-4738-01	1	0	1	0
hnsc_tcga	TCGA-CN-4739-01	1	1	1	0
hnsc_tcga	TCGA-CN-4742-01	1	0	1	0
hnsc_tcga	TCGA-CN-5358-01	1	0	1	0
hnsc_tcga	TCGA-CR-5243-01	1	1	0	1
hnsc_tcga	TCGA-CR-5249-01	1	1	0	0
hnsc_tcga	TCGA-CR-5250-01	0	0	0	0
hnsc_tcga	TCGA-CV-5436-01	1	0	1	1
hnsc_tcga	TCGA-CV-5440-01	1	0	1	0
hnsc_tcga	TCGA-CV-5441-01	1	0	0	1
hnsc_tcga	TCGA-CV-5442-01	1	1	0	0
hnsc_tcga	TCGA-CV-5443-01	0	0	0	0
hnsc_tcga	TCGA-CV-5444-01	1	0	1	0

## Sheet: KIRC
Mutations of ARID1A, APC and KMT2C in KIRC samples from TCGA.
studyID	sampleId	Altered	ARID1A	APC	KMT2C
kirc_tcga	TCGA-B0-5698-01	0	0	0	0
kirc_tcga	TCGA-B0-5710-01	0	0	0	0
kirc_tcga	TCGA-B0-5711-01	1	0	1	0
kirc_tcga	TCGA-B0-5712-01	0	0	0	0
kirc_tcga	TCGA-B0-5713-01	1	1	0	0
kirc_tcga	TCGA-B0-5812-01	1	0	1	0
kirc_tcga	TCGA-B4-5832-01	0	0	0	0
kirc_tcga	TCGA-B4-5834-01	0	0	0	0
kirc_tcga	TCGA-B4-5835-01	0	0	0	0
kirc_tcga	TCGA-B4-5836-01	0	0	0	0
kirc_tcga	TCGA-B4-5838-01	0	0	0	0
kirc_tcga	TCGA-B4-5843-01	0	0	0	0
kirc_tcga	TCGA-B4-5844-01	1	0	0	1
kirc_tcga	TCGA-B8-4146-01	0	0	0	0
kirc_tcga	TCGA-B8-4153-01	0	0	0	0
kirc_tcga	TCGA-B8-5545-01	0	0	0	0
kirc_tcga	TCGA-B8-5552-01	1	0	1	0
kirc_tcga	TCGA-CJ-5686-01	0	0	0	0
kirc_tcga	TCGA-CJ-6027-01	0	0	0	0
kirc_tcga	TCGA-CJ-6028-01	0	0	0	0
kirc_tcga	TCGA-CJ-6030-01	0	0	0	0
kirc_tcga	TCGA-CJ-6031-01	1	0	1	0
kirc_tcga	TCGA-CJ-6032-01	1	1	0	0
kirc_tcga	TCGA-CJ-6033-01	1	0	1	0
kirc_tcga	TCGA-CW-5580-01	0	0	0	0
kirc_tcga	TCGA-CW-6087-01	0	0	0	0
kirc_tcga	TCGA-CW-6090-01	0	0	0	0
kirc_tcga	TCGA-CW-6093-01	0	0	0	0
kirc_tcga	TCGA-CW-6097-01	1	1	0	0
kirc_tcga	TCGA-CZ-5982-01	0	0	0	0
kirc_tcga	TCGA-CZ-5984-01	0	0	0	0
kirc_tcga	TCGA-CZ-5985-01	1	0	1	0
kirc_tcga	TCGA-CZ-5986-01	1	0	0	1
kirc_tcga	TCGA-CZ-5987-01	0	0	0	0
kirc_tcga	TCGA-CZ-5988-01	1	0	0	1
kirc_tcga	TCGA-CZ-5989-01	0	0	0	0
kirc_tcga	TCGA-EU-5904-01	1	0	1	0
kirc_tcga	TCGA-EU-5905-01	0	0	0	0
kirc_tcga	TCGA-EU-5906-01	0	0	0	0
kirc_tcga	TCGA-EU-5907-01	0	0	0	0
kirc_tcga	TCGA-A3-3308-01	1	1	0	0
kirc_tcga	TCGA-A3-3311-01	0	0	0	0
kirc_tcga	TCGA-A3-3313-01	1	1	0	0
kirc_tcga	TCGA-A3-3316-01	1	1	1	0
kirc_tcga	TCGA-A3-3317-01	0	0	0	0
kirc_tcga	TCGA-A3-3319-01	1	1	0	1
kirc_tcga	TCGA-A3-3320-01	1	1	1	1
kirc_tcga	TCGA-A3-3322-01	0	0	0	0
kirc_tcga	TCGA-A3-3323-01	0	0	0	0
kirc_tcga	TCGA-A3-3326-01	0	0	0	0
kirc_tcga	TCGA-A3-3331-01	0	0	0	0
kirc_tcga	TCGA-A3-3346-01	1	1	0	0
kirc_tcga	TCGA-A3-3363-01	1	1	0	1
kirc_tcga	TCGA-A3-3365-01	1	1	0	0
kirc_tcga	TCGA-A3-3372-01	0	0	0	0
kirc_tcga	TCGA-A3-3374-01	0	0	0	0
kirc_tcga	TCGA-A3-3378-01	1	1	0	1
kirc_tcga	TCGA-A3-3380-01	1	1	1	0
kirc_tcga	TCGA-A3-3382-01	1	1	0	0
kirc_tcga	TCGA-A3-3383-01	0	0	0	0
kirc_tcga	TCGA-AK-3427-01	0	0	0	0
kirc_tcga	TCGA-AK-3440-01	0	0	0	0
kirc_tcga	TCGA-AK-3443-01	0	0	0	0
kirc_tcga	TCGA-AK-3444-01	1	1	0	0
kirc_tcga	TCGA-AK-3447-01	0	0	0	0
kirc_tcga	TCGA-AK-3453-01	1	1	0	0
kirc_tcga	TCGA-AK-3455-01	0	0	0	0
kirc_tcga	TCGA-AK-3465-01	1	1	0	0
kirc_tcga	TCGA-AS-3777-01	0	0	0	0
kirc_tcga	TCGA-AS-3778-01	1	1	0	0
kirc_tcga	TCGA-A3-3347-01	0	0	0	0
kirc_tcga	TCGA-A3-3349-01	0	0	0	0
kirc_tcga	TCGA-A3-3362-01	1	0	1	0
kirc_tcga	TCGA-AK-3429-01	0	0	0	0
kirc_tcga	TCGA-AK-3430-01	0	0	0	0
kirc_tcga	TCGA-AK-3436-01	0	0	0	0
kirc_tcga	TCGA-AK-3451-01	1	0	1	0
kirc_tcga	TCGA-AK-3456-01	0	0	0	0
kirc_tcga	TCGA-B2-3923-01	0	0	0	0
kirc_tcga	TCGA-B2-3924-01	0	0	0	0
kirc_tcga	TCGA-B2-4098-01	0	0	0	0
kirc_tcga	TCGA-B2-4099-01	1	0	1	0
kirc_tcga	TCGA-B8-4143-01	0	0	0	0
kirc_tcga	TCGA-B8-4148-01	0	0	0	0
kirc_tcga	TCGA-B8-4151-01	0	0	0	0
kirc_tcga	TCGA-B8-4154-01	0	0	0	0
kirc_tcga	TCGA-B8-4619-01	0	0	0	0
kirc_tcga	TCGA-B8-4620-01	0	0	0	0
kirc_tcga	TCGA-BP-4161-01	0	0	0	0
kirc_tcga	TCGA-BP-4162-01	1	0	1	0
kirc_tcga	TCGA-BP-4163-01	0	0	0	0
kirc_tcga	TCGA-BP-4164-01	1	0	0	1
kirc_tcga	TCGA-BP-4167-01	1	0	1	0
kirc_tcga	TCGA-CJ-4634-01	0	0	0	0
kirc_tcga	TCGA-CJ-4636-01	0	0	0	0
kirc_tcga	TCGA-CJ-4637-01	0	0	0	0
kirc_tcga	TCGA-CJ-4638-01	0	0	0	0
kirc_tcga	TCGA-CJ-4639-01	0	0	0	0
kirc_tcga	TCGA-CJ-4640-01	0	0	0	0
kirc_tcga	TCGA-CJ-4641-01	1	0	1	0
kirc_tcga	TCGA-CJ-4643-01	0	0	0	0
kirc_tcga	TCGA-CJ-4644-01	0	0	0	0
kirc_tcga	TCGA-AK-3425-01	0	0	0	0
kirc_tcga	TCGA-AK-3428-01	0	0	0	0
kirc_tcga	TCGA-AK-3431-01	0	0	0	0
kirc_tcga	TCGA-AK-3434-01	0	0	0	0
kirc_tcga	TCGA-AK-3445-01	0	0	0	0
kirc_tcga	TCGA-AK-3450-01	0	0	0	0
kirc_tcga	TCGA-AK-3454-01	1	0	1	0
kirc_tcga	TCGA-AK-3460-01	0	0	0	0
kirc_tcga	TCGA-AK-3461-01	0	0	0	0
kirc_tcga	TCGA-B0-4690-01	1	1	0	0
kirc_tcga	TCGA-B0-4691-01	0	0	0	0
kirc_tcga	TCGA-B0-4693-01	0	0	0	0
kirc_tcga	TCGA-B0-4694-01	0	0	0	0
kirc_tcga	TCGA-B0-4697-01	0	0	0	0
kirc_tcga	TCGA-B0-4703-01	0	0	0	0
kirc_tcga	TCGA-B0-4707-01	0	0	0	0
kirc_tcga	TCGA-B0-4713-01	0	0	0	0
kirc_tcga	TCGA-B0-4714-01	0	0	0	0
kirc_tcga	TCGA-B0-4718-01	0	0	0	0
kirc_tcga	TCGA-B0-4813-01	0	0	0	0
kirc_tcga	TCGA-B0-4814-01	0	0	0	0
kirc_tcga	TCGA-B0-4817-01	0	0	0	0
kirc_tcga	TCGA-B0-4819-01	1	1	0	0
kirc_tcga	TCGA-B0-4822-01	0	0	0	0
kirc_tcga	TCGA-B0-4824-01	0	0	0	0
kirc_tcga	TCGA-B0-4828-01	0	0	0	0
kirc_tcga	TCGA-B0-4841-01	0	0	0	0
kirc_tcga	TCGA-B0-4843-01	1	0	1	0
kirc_tcga	TCGA-B0-4844-01	0	0	0	0
kirc_tcga	TCGA-B0-4845-01	0	0	0	0
kirc_tcga	TCGA-B0-4846-01	0	0	0	0
kirc_tcga	TCGA-B0-4847-01	0	0	0	0
kirc_tcga	TCGA-B0-4848-01	0	0	0	0
kirc_tcga	TCGA-B0-4849-01	0	0	0	0
kirc_tcga	TCGA-B2-4101-01	1	0	1	0
kirc_tcga	TCGA-B8-4622-01	0	0	0	0
kirc_tcga	TCGA-BP-4158-01	0	0	0	0
kirc_tcga	TCGA-BP-4159-01	0	0	0	0
kirc_tcga	TCGA-BP-4160-01	0	0	0	0
kirc_tcga	TCGA-BP-4165-01	0	0	0	0
kirc_tcga	TCGA-BP-4166-01	0	0	0	0
kirc_tcga	TCGA-BP-4169-01	0	0	0	0
kirc_tcga	TCGA-BP-4170-01	1	0	1	0
kirc_tcga	TCGA-BP-4173-01	1	0	0	1
kirc_tcga	TCGA-BP-4174-01	0	0	0	0
kirc_tcga	TCGA-BP-4176-01	0	0	0	0
kirc_tcga	TCGA-BP-4326-01	0	0	0	0
kirc_tcga	TCGA-BP-4329-01	0	0	0	0
kirc_tcga	TCGA-BP-4330-01	1	0	1	0
kirc_tcga	TCGA-BP-4331-01	0	0	0	0
kirc_tcga	TCGA-BP-4337-01	0	0	0	0
kirc_tcga	TCGA-BP-4338-01	0	0	0	0
kirc_tcga	TCGA-BP-4340-01	0	0	0	0
kirc_tcga	TCGA-BP-4341-01	0	0	0	0
kirc_tcga	TCGA-BP-4342-01	0	0	0	0
kirc_tcga	TCGA-BP-4343-01	0	0	0	0
kirc_tcga	TCGA-BP-4346-01	0	0	0	0
kirc_tcga	TCGA-BP-4347-01	0	0	0	0
kirc_tcga	TCGA-BP-4349-01	0	0	0	0
kirc_tcga	TCGA-BP-4351-01	0	0	0	0
kirc_tcga	TCGA-BP-4352-01	0	0	0	0
kirc_tcga	TCGA-BP-4354-01	1	0	1	0
kirc_tcga	TCGA-BP-4355-01	1	0	1	0
kirc_tcga	TCGA-BP-4756-01	1	0	0	1
kirc_tcga	TCGA-BP-4758-01	0	0	0	0
kirc_tcga	TCGA-BP-4759-01	1	0	0	1
kirc_tcga	TCGA-BP-4761-01	0	0	0	0
kirc_tcga	TCGA-BP-4762-01	0	0	0	0
kirc_tcga	TCGA-BP-4763-01	0	0	0	0
kirc_tcga	TCGA-BP-4765-01	0	0	0	0
kirc_tcga	TCGA-BP-4766-01	0	0	0	0
kirc_tcga	TCGA-BP-4768-01	0	0	0	0
kirc_tcga	TCGA-BP-4771-01	0	0	0	0
kirc_tcga	TCGA-BP-4774-01	0	0	0	0
kirc_tcga	TCGA-BP-4775-01	1	0	1	0
kirc_tcga	TCGA-BP-4777-01	1	0	1	0
kirc_tcga	TCGA-B0-4833-01	0	0	0	0
kirc_tcga	TCGA-B0-4836-01	0	0	0	0
kirc_tcga	TCGA-B0-4837-01	0	0	0	0
kirc_tcga	TCGA-B0-4838-01	0	0	0	0
kirc_tcga	TCGA-B0-4839-01	0	0	0	0
kirc_tcga	TCGA-BP-4781-01	0	0	0	0
kirc_tcga	TCGA-BP-4787-01	0	0	0	0
kirc_tcga	TCGA-BP-4789-01	0	0	0	0
kirc_tcga	TCGA-BP-4790-01	0	0	0	0
kirc_tcga	TCGA-BP-4797-01	0	0	0	0
kirc_tcga	TCGA-BP-4798-01	0	0	0	0
kirc_tcga	TCGA-BP-4799-01	0	0	0	0
kirc_tcga	TCGA-BP-4803-01	0	0	0	0
kirc_tcga	TCGA-BP-4804-01	0	0	0	0
kirc_tcga	TCGA-BP-4807-01	0	0	0	0
kirc_tcga	TCGA-CJ-4635-01	0	0	0	0
kirc_tcga	TCGA-CJ-4868-01	0	0	0	0
kirc_tcga	TCGA-CJ-4870-01	0	0	0	0
kirc_tcga	TCGA-CJ-4871-01	0	0	0	0
kirc_tcga	TCGA-CJ-4872-01	0	0	0	0
kirc_tcga	TCGA-CJ-4873-01	1	0	1	0
kirc_tcga	TCGA-CJ-4874-01	1	0	1	0
kirc_tcga	TCGA-CJ-4875-01	0	0	0	0
kirc_tcga	TCGA-CJ-4876-01	0	0	0	0
kirc_tcga	TCGA-CJ-4878-01	0	0	0	0
kirc_tcga	TCGA-CJ-4881-01	0	0	0	0
kirc_tcga	TCGA-CJ-4884-01	0	0	0	0
kirc_tcga	TCGA-CJ-4885-01	0	0	0	0
kirc_tcga	TCGA-CJ-4886-01	1	0	1	0
kirc_tcga	TCGA-CJ-4887-01	0	0	0	0
kirc_tcga	TCGA-CJ-4888-01	0	0	0	0
kirc_tcga	TCGA-CJ-4889-01	0	0	0	0
kirc_tcga	TCGA-CJ-4890-01	0	0	0	0
kirc_tcga	TCGA-CJ-4891-01	0	0	0	0
kirc_tcga	TCGA-CJ-4892-01	0	0	0	0
kirc_tcga	TCGA-CJ-4893-01	0	0	0	0
kirc_tcga	TCGA-CJ-4894-01	0	0	0	0
kirc_tcga	TCGA-CJ-4895-01	0	0	0	0
kirc_tcga	TCGA-CZ-4854-01	0	0	0	0
kirc_tcga	TCGA-CZ-4857-01	1	1	0	1
kirc_tcga	TCGA-CZ-4858-01	0	0	0	0
kirc_tcga	TCGA-CZ-4861-01	1	1	0	0
kirc_tcga	TCGA-CZ-4862-01	0	0	0	0
kirc_tcga	TCGA-A3-3357-01	0	0	0	0
kirc_tcga	TCGA-A3-3367-01	0	0	0	0
kirc_tcga	TCGA-A3-3370-01	1	0	1	1
kirc_tcga	TCGA-A3-3373-01	0	0	0	0
kirc_tcga	TCGA-A3-3376-01	1	0	1	1
kirc_tcga	TCGA-A3-3385-01	0	0	0	0
kirc_tcga	TCGA-B0-4823-01	0	0	0	0
kirc_tcga	TCGA-B0-4827-01	0	0	0	0
kirc_tcga	TCGA-B0-4842-01	1	0	1	0
kirc_tcga	TCGA-B0-4945-01	1	0	1	1
kirc_tcga	TCGA-B0-5092-01	0	0	0	0
kirc_tcga	TCGA-B0-5094-01	0	0	0	0
kirc_tcga	TCGA-B0-5095-01	0	0	0	0
kirc_tcga	TCGA-B0-5096-01	0	0	0	0
kirc_tcga	TCGA-B0-5097-01	1	0	0	1
kirc_tcga	TCGA-B0-5098-01	1	0	1	1
kirc_tcga	TCGA-B0-5099-01	1	0	0	1
kirc_tcga	TCGA-B0-5100-01	0	0	0	0
kirc_tcga	TCGA-B0-5102-01	1	1	0	0
kirc_tcga	TCGA-B0-5104-01	0	0	0	0
kirc_tcga	TCGA-B0-5106-01	0	0	0	0
kirc_tcga	TCGA-B0-5107-01	0	0	0	0
kirc_tcga	TCGA-B0-5108-01	0	0	0	0
kirc_tcga	TCGA-B0-5109-01	0	0	0	0
kirc_tcga	TCGA-B0-5110-01	0	0	0	0
kirc_tcga	TCGA-B0-5113-01	0	0	0	0
kirc_tcga	TCGA-B0-5115-01	0	0	0	0
kirc_tcga	TCGA-B0-5116-01	1	0	1	0
kirc_tcga	TCGA-B0-5117-01	0	0	0	0
kirc_tcga	TCGA-B0-5119-01	0	0	0	0
kirc_tcga	TCGA-B0-5120-01	0	0	0	0
kirc_tcga	TCGA-B0-5121-01	0	0	0	0
kirc_tcga	TCGA-B8-5158-01	0	0	0	0
kirc_tcga	TCGA-B8-5159-01	0	0	0	0
kirc_tcga	TCGA-B8-5162-01	0	0	0	0
kirc_tcga	TCGA-B8-5163-01	0	0	0	0
kirc_tcga	TCGA-B8-5164-01	0	0	0	0
kirc_tcga	TCGA-B8-5165-01	0	0	0	0
kirc_tcga	TCGA-BP-4177-01	0	0	0	0
kirc_tcga	TCGA-BP-4760-01	0	0	0	0
kirc_tcga	TCGA-BP-4782-01	0	0	0	0
kirc_tcga	TCGA-BP-4795-01	0	0	0	0
kirc_tcga	TCGA-BP-4801-01	1	0	1	0
kirc_tcga	TCGA-BP-4993-01	0	0	0	0
kirc_tcga	TCGA-BP-5010-01	0	0	0	0
kirc_tcga	TCGA-BP-5168-01	0	0	0	0
kirc_tcga	TCGA-B0-5075-01	0	0	0	0
kirc_tcga	TCGA-B0-5077-01	0	0	0	0
kirc_tcga	TCGA-B0-5081-01	1	0	1	0
kirc_tcga	TCGA-B0-5084-01	0	0	0	0
kirc_tcga	TCGA-B0-5085-01	1	0	1	0
kirc_tcga	TCGA-B0-5088-01	0	0	0	0
kirc_tcga	TCGA-BP-4960-01	0	0	0	0
kirc_tcga	TCGA-BP-4961-01	1	0	0	1
kirc_tcga	TCGA-BP-4962-01	0	0	0	0
kirc_tcga	TCGA-BP-4963-01	0	0	0	0
kirc_tcga	TCGA-BP-4964-01	0	0	0	0
kirc_tcga	TCGA-BP-4965-01	0	0	0	0
kirc_tcga	TCGA-BP-4967-01	0	0	0	0
kirc_tcga	TCGA-BP-4968-01	0	0	0	0
kirc_tcga	TCGA-BP-4970-01	0	0	0	0
kirc_tcga	TCGA-BP-4971-01	0	0	0	0
kirc_tcga	TCGA-BP-4972-01	0	0	0	0
kirc_tcga	TCGA-BP-4973-01	0	0	0	0
kirc_tcga	TCGA-BP-4974-01	1	0	1	0
kirc_tcga	TCGA-BP-4975-01	0	0	0	0
kirc_tcga	TCGA-BP-4976-01	1	0	0	1
kirc_tcga	TCGA-BP-4977-01	1	0	1	0
kirc_tcga	TCGA-BP-4981-01	0	0	0	0
kirc_tcga	TCGA-BP-4982-01	0	0	0	0
kirc_tcga	TCGA-BP-4983-01	0	0	0	0
kirc_tcga	TCGA-BP-4985-01	0	0	0	0
kirc_tcga	TCGA-BP-4986-01	0	0	0	0
kirc_tcga	TCGA-BP-4987-01	0	0	0	0
kirc_tcga	TCGA-BP-4988-01	0	0	0	0
kirc_tcga	TCGA-BP-4989-01	0	0	0	0
kirc_tcga	TCGA-BP-4991-01	0	0	0	0
kirc_tcga	TCGA-BP-4992-01	0	0	0	0
kirc_tcga	TCGA-BP-4994-01	0	0	0	0
kirc_tcga	TCGA-BP-4995-01	0	0	0	0
kirc_tcga	TCGA-BP-4998-01	0	0	0	0
kirc_tcga	TCGA-BP-4999-01	0	0	0	0
kirc_tcga	TCGA-BP-5000-01	0	0	0	0
kirc_tcga	TCGA-BP-5001-01	0	0	0	0
kirc_tcga	TCGA-BP-5004-01	0	0	0	0
kirc_tcga	TCGA-BP-5006-01	1	0	1	0
kirc_tcga	TCGA-BP-5007-01	0	0	0	0
kirc_tcga	TCGA-BP-5008-01	0	0	0	0
kirc_tcga	TCGA-BP-5009-01	0	0	0	0
kirc_tcga	TCGA-CJ-4899-01	0	0	0	0
kirc_tcga	TCGA-CJ-4900-01	0	0	0	0
kirc_tcga	TCGA-BP-5169-01	0	0	0	0
kirc_tcga	TCGA-BP-5170-01	0	0	0	0
kirc_tcga	TCGA-BP-5173-01	0	0	0	0
kirc_tcga	TCGA-BP-5174-01	0	0	0	0
kirc_tcga	TCGA-BP-5175-01	0	0	0	0
kirc_tcga	TCGA-BP-5176-01	0	0	0	0
kirc_tcga	TCGA-BP-5177-01	0	0	0	0
kirc_tcga	TCGA-BP-5178-01	0	0	0	0
kirc_tcga	TCGA-BP-5180-01	0	0	0	0
kirc_tcga	TCGA-BP-5181-01	0	0	0	0
kirc_tcga	TCGA-BP-5182-01	0	0	0	0
kirc_tcga	TCGA-BP-5183-01	1	0	1	0
kirc_tcga	TCGA-BP-5184-01	0	0	0	0
kirc_tcga	TCGA-BP-5185-01	0	0	0	0
kirc_tcga	TCGA-BP-5186-01	0	0	0	0
kirc_tcga	TCGA-BP-5187-01	0	0	0	0
kirc_tcga	TCGA-BP-5189-01	0	0	0	0
kirc_tcga	TCGA-BP-5190-01	0	0	0	0
kirc_tcga	TCGA-BP-5191-01	0	0	0	0
kirc_tcga	TCGA-BP-5192-01	0	0	0	0
kirc_tcga	TCGA-BP-5194-01	0	0	0	0
kirc_tcga	TCGA-BP-5195-01	0	0	0	0
kirc_tcga	TCGA-BP-5196-01	0	0	0	0
kirc_tcga	TCGA-BP-5198-01	0	0	0	0
kirc_tcga	TCGA-BP-5199-01	1	1	0	0
kirc_tcga	TCGA-BP-5200-01	0	0	0	0
kirc_tcga	TCGA-BP-5201-01	1	0	1	0
kirc_tcga	TCGA-BP-5202-01	0	0	0	0
kirc_tcga	TCGA-CJ-4869-01	0	0	0	0
kirc_tcga	TCGA-CJ-4882-01	0	0	0	0
kirc_tcga	TCGA-CJ-4897-01	0	0	0	0
kirc_tcga	TCGA-CJ-4901-01	0	0	0	0
kirc_tcga	TCGA-CJ-4902-01	0	0	0	0
kirc_tcga	TCGA-CJ-4903-01	0	0	0	0
kirc_tcga	TCGA-CJ-4904-01	0	0	0	0
kirc_tcga	TCGA-CJ-4905-01	0	0	0	0
kirc_tcga	TCGA-CJ-4907-01	0	0	0	0
kirc_tcga	TCGA-CJ-4908-01	0	0	0	0
kirc_tcga	TCGA-CJ-4912-01	1	1	0	0
kirc_tcga	TCGA-CJ-4913-01	0	0	0	0
kirc_tcga	TCGA-CJ-4916-01	0	0	0	0
kirc_tcga	TCGA-CJ-4918-01	0	0	0	0
kirc_tcga	TCGA-CJ-4920-01	0	0	0	0
kirc_tcga	TCGA-CJ-4923-01	0	0	0	0
kirc_tcga	TCGA-CZ-4853-01	0	0	0	0
kirc_tcga	TCGA-CZ-4856-01	0	0	0	0
kirc_tcga	TCGA-CZ-4859-01	0	0	0	0
kirc_tcga	TCGA-AK-3458-01	1	0	1	0
kirc_tcga	TCGA-B0-4706-01	0	0	0	0
kirc_tcga	TCGA-B0-4710-01	0	0	0	0
kirc_tcga	TCGA-B0-4712-01	0	0	0	0
kirc_tcga	TCGA-B0-4810-01	1	0	1	1
kirc_tcga	TCGA-B0-4811-01	0	0	0	0
kirc_tcga	TCGA-B0-4815-01	0	0	0	0
kirc_tcga	TCGA-B0-4816-01	0	0	0	0
kirc_tcga	TCGA-B0-4818-01	0	0	0	0
kirc_tcga	TCGA-B0-4852-01	0	0	0	0
kirc_tcga	TCGA-B0-5080-01	0	0	0	0
kirc_tcga	TCGA-B0-5399-01	0	0	0	0
kirc_tcga	TCGA-B0-5400-01	0	0	0	0
kirc_tcga	TCGA-B0-5402-01	1	0	1	0
kirc_tcga	TCGA-B4-5377-01	0	0	0	0
kirc_tcga	TCGA-B8-4621-01	0	0	0	0
kirc_tcga	TCGA-BP-4770-01	0	0	0	0
kirc_tcga	TCGA-CZ-4863-01	0	0	0	0
kirc_tcga	TCGA-CZ-4865-01	0	0	0	0
kirc_tcga	TCGA-CZ-4866-01	0	0	0	0
kirc_tcga	TCGA-CZ-5451-01	0	0	0	0
kirc_tcga	TCGA-CZ-5452-01	0	0	0	0
kirc_tcga	TCGA-CZ-5453-01	0	0	0	0
kirc_tcga	TCGA-CZ-5454-01	0	0	0	0
kirc_tcga	TCGA-CZ-5455-01	1	0	1	0
kirc_tcga	TCGA-CZ-5456-01	0	0	0	0
kirc_tcga	TCGA-CZ-5457-01	0	0	0	0
kirc_tcga	TCGA-CZ-5458-01	0	0	0	0
kirc_tcga	TCGA-CZ-5459-01	0	0	0	0
kirc_tcga	TCGA-CZ-5460-01	0	0	0	0
kirc_tcga	TCGA-CZ-5461-01	0	0	0	0
kirc_tcga	TCGA-CZ-5462-01	0	0	0	0
kirc_tcga	TCGA-CZ-5463-01	0	0	0	0
kirc_tcga	TCGA-CZ-5465-01	0	0	0	0
kirc_tcga	TCGA-CZ-5466-01	1	0	1	0
kirc_tcga	TCGA-CZ-5467-01	0	0	0	0
kirc_tcga	TCGA-CZ-5468-01	1	0	1	1
kirc_tcga	TCGA-CZ-5469-01	0	0	0	0
kirc_tcga	TCGA-CZ-5470-01	0	0	0	0
kirc_tcga	TCGA-A3-3358-01	0	0	0	0
kirc_tcga	TCGA-A3-3387-01	0	0	0	0
kirc_tcga	TCGA-B0-4700-01	0	0	0	0
kirc_tcga	TCGA-B0-5691-01	1	0	1	0
kirc_tcga	TCGA-B0-5692-01	1	1	0	0
kirc_tcga	TCGA-B0-5693-01	0	0	0	0
kirc_tcga	TCGA-B0-5694-01	0	0	0	0
kirc_tcga	TCGA-B0-5695-01	0	0	0	0
kirc_tcga	TCGA-B0-5696-01	0	0	0	0
kirc_tcga	TCGA-B0-5697-01	0	0	0	0
kirc_tcga	TCGA-B0-5699-01	0	0	0	0
kirc_tcga	TCGA-B0-5701-01	0	0	0	0
kirc_tcga	TCGA-B0-5702-01	0	0	0	0
kirc_tcga	TCGA-B0-5703-01	0	0	0	0
kirc_tcga	TCGA-B0-5705-01	0	0	0	0
kirc_tcga	TCGA-B0-5706-01	0	0	0	0
kirc_tcga	TCGA-B0-5709-01	0	0	0	0
kirc_tcga	TCGA-B2-5633-01	1	0	0	1
kirc_tcga	TCGA-B2-5635-01	0	0	0	0
kirc_tcga	TCGA-B2-5641-01	0	0	0	0
kirc_tcga	TCGA-B8-5546-01	0	0	0	0
kirc_tcga	TCGA-B8-5549-01	1	1	0	0
kirc_tcga	TCGA-B8-5550-01	0	0	0	0
kirc_tcga	TCGA-B8-5551-01	0	0	0	0
kirc_tcga	TCGA-B8-5553-01	1	0	1	0
kirc_tcga	TCGA-CJ-5671-01	0	0	0	0
kirc_tcga	TCGA-CJ-5672-01	0	0	0	0
kirc_tcga	TCGA-CJ-5675-01	0	0	0	0
kirc_tcga	TCGA-CJ-5676-01	0	0	0	0
kirc_tcga	TCGA-CJ-5677-01	0	0	0	0
kirc_tcga	TCGA-CJ-5678-01	1	0	0	1
kirc_tcga	TCGA-CJ-5679-01	0	0	0	0
kirc_tcga	TCGA-CJ-5680-01	0	0	0	0
kirc_tcga	TCGA-CJ-5681-01	0	0	0	0
kirc_tcga	TCGA-CJ-5682-01	0	0	0	0
kirc_tcga	TCGA-CJ-5683-01	1	0	0	1
kirc_tcga	TCGA-CJ-5684-01	0	0	0	0
kirc_tcga	TCGA-CW-5581-01	0	0	0	0
kirc_tcga	TCGA-CW-5583-01	0	0	0	0
kirc_tcga	TCGA-CW-5585-01	0	0	0	0
kirc_tcga	TCGA-CW-5588-01	0	0	0	0
kirc_tcga	TCGA-CW-5589-01	0	0	0	0
kirc_tcga	TCGA-CW-5591-01	0	0	0	0
kirc_tcga	TCGA-DV-5565-01	0	0	0	0
kirc_tcga	TCGA-DV-5566-01	0	0	0	0
kirc_tcga	TCGA-DV-5568-01	0	0	0	0
kirc_tcga	TCGA-DV-5569-01	1	0	1	0
kirc_tcga	TCGA-DV-5574-01	0	0	0	0
kirc_tcga	TCGA-DV-5575-01	1	0	0	1
kirc_tcga	TCGA-DV-5576-01	0	0	0	0

## Sheet: LIHC
Mutations of ARID1A, TP53 and MYC in LIHC samples from TCGA.
studyID	sampleId	Altered	ARID1A	TP53	MYC
lihc_tcga	TCGA-BC-4073-01	0	0	0	0
lihc_tcga	TCGA-BC-A10Q-01	0	0	0	0
lihc_tcga	TCGA-BC-A10R-01	1	0	1	0
lihc_tcga	TCGA-BC-A10T-01	0	0	0	0
lihc_tcga	TCGA-BC-A10U-01	1	0	1	0
lihc_tcga	TCGA-BC-A10W-01	1	1	0	0
lihc_tcga	TCGA-BC-A10X-01	0	0	0	0
lihc_tcga	TCGA-BC-A10Y-01	0	0	0	0
lihc_tcga	TCGA-BC-A10Z-01	1	0	0	1
lihc_tcga	TCGA-BC-A110-01	0	0	0	0
lihc_tcga	TCGA-BC-A112-01	0	0	0	0
lihc_tcga	TCGA-CC-5258-01	1	1	1	1
lihc_tcga	TCGA-CC-5260-01	0	0	0	0
lihc_tcga	TCGA-CC-5261-01	0	0	0	0
lihc_tcga	TCGA-CC-5262-01	1	1	0	0
lihc_tcga	TCGA-CC-5263-01	1	0	1	0
lihc_tcga	TCGA-CC-5264-01	0	0	0	0
lihc_tcga	TCGA-CC-A1HT-01	1	0	1	0
lihc_tcga	TCGA-DD-A113-01	0	0	0	0
lihc_tcga	TCGA-DD-A114-01	1	0	1	0
lihc_tcga	TCGA-DD-A115-01	0	0	0	0
lihc_tcga	TCGA-DD-A116-01	0	0	0	0
lihc_tcga	TCGA-DD-A118-01	0	0	0	0
lihc_tcga	TCGA-DD-A119-01	1	0	1	1
lihc_tcga	TCGA-DD-A11A-01	1	0	1	0
lihc_tcga	TCGA-DD-A11B-01	0	0	0	0
lihc_tcga	TCGA-DD-A11C-01	0	0	0	0
lihc_tcga	TCGA-DD-A11D-01	0	0	0	0
lihc_tcga	TCGA-DD-A1EA-01	1	0	1	0
lihc_tcga	TCGA-DD-A1EB-01	1	0	1	0
lihc_tcga	TCGA-DD-A1EC-01	0	0	0	0
lihc_tcga	TCGA-DD-A1EE-01	1	1	1	0
lihc_tcga	TCGA-DD-A1EF-01	0	0	0	0
lihc_tcga	TCGA-DD-A1EH-01	1	1	0	0
lihc_tcga	TCGA-DD-A1EI-01	1	0	1	1
lihc_tcga	TCGA-EP-A12J-01	1	0	0	1
lihc_tcga	TCGA-BC-A216-01	1	0	1	0
lihc_tcga	TCGA-BC-A217-01	0	0	0	0
lihc_tcga	TCGA-DD-A1E9-01	0	0	0	0
lihc_tcga	TCGA-DD-A1ED-01	0	0	0	0
lihc_tcga	TCGA-DD-A1EJ-01	0	0	0	0
lihc_tcga	TCGA-DD-A1EL-01	1	0	1	1
lihc_tcga	TCGA-EP-A26S-01	0	0	0	0
lihc_tcga	TCGA-FV-A23B-01	1	1	0	0
lihc_tcga	TCGA-G3-A25S-01	0	0	0	0
lihc_tcga	TCGA-G3-A25T-01	1	0	0	1
lihc_tcga	TCGA-G3-A25U-01	1	0	1	0
lihc_tcga	TCGA-G3-A25V-01	1	0	1	1
lihc_tcga	TCGA-G3-A25W-01	0	0	0	0
lihc_tcga	TCGA-G3-A25Y-01	0	0	0	0
lihc_tcga	TCGA-G3-A25Z-01	1	0	1	0
lihc_tcga	TCGA-EP-A2KA-01	1	0	0	1
lihc_tcga	TCGA-EP-A2KB-01	1	1	0	0
lihc_tcga	TCGA-ES-A2HS-01	0	0	0	0
lihc_tcga	TCGA-ES-A2HT-01	1	1	1	1
lihc_tcga	TCGA-BC-A3KF-01	0	0	0	0
lihc_tcga	TCGA-BC-A3KG-01	1	0	1	0
lihc_tcga	TCGA-BD-A2L6-01	0	0	0	0
lihc_tcga	TCGA-BD-A3ER-01	1	1	0	0
lihc_tcga	TCGA-CC-A3M9-01	1	0	1	0
lihc_tcga	TCGA-CC-A3MA-01	1	0	1	1
lihc_tcga	TCGA-CC-A3MB-01	1	0	1	0
lihc_tcga	TCGA-DD-A1EG-01	1	0	1	1
lihc_tcga	TCGA-DD-A1EK-01	0	0	0	0
lihc_tcga	TCGA-DD-A39V-01	1	1	0	1
lihc_tcga	TCGA-DD-A39W-01	1	1	0	0
lihc_tcga	TCGA-DD-A39X-01	1	1	0	1
lihc_tcga	TCGA-DD-A39Y-01	1	1	1	1
lihc_tcga	TCGA-DD-A39Z-01	0	0	0	0
lihc_tcga	TCGA-DD-A3A0-01	1	0	1	0
lihc_tcga	TCGA-DD-A3A1-01	0	0	0	0
lihc_tcga	TCGA-DD-A3A2-01	0	0	0	0
lihc_tcga	TCGA-EP-A2KC-01	0	0	0	0
lihc_tcga	TCGA-EP-A3JL-01	1	0	0	1
lihc_tcga	TCGA-FV-A2QR-01	0	0	0	0
lihc_tcga	TCGA-G3-A3CG-01	1	1	0	0
lihc_tcga	TCGA-G3-A3CI-01	1	0	0	1
lihc_tcga	TCGA-G3-A3CJ-01	1	1	1	0
lihc_tcga	TCGA-G3-A3CK-01	0	0	0	0
lihc_tcga	TCGA-BD-A3EP-01	1	0	1	0
lihc_tcga	TCGA-CC-A3MC-01	0	0	0	0
lihc_tcga	TCGA-DD-A3A3-01	1	0	0	1
lihc_tcga	TCGA-DD-A3A4-01	0	0	0	0
lihc_tcga	TCGA-DD-A3A5-01	0	0	0	0
lihc_tcga	TCGA-DD-A3A6-01	0	0	0	0
lihc_tcga	TCGA-DD-A3A7-01	1	0	1	1
lihc_tcga	TCGA-DD-A3A8-01	1	0	0	1
lihc_tcga	TCGA-EP-A3RK-01	0	0	0	0
lihc_tcga	TCGA-FV-A2QQ-01	1	0	0	1
lihc_tcga	TCGA-FV-A3I0-01	0	0	0	0
lihc_tcga	TCGA-FV-A3I1-01	1	0	1	0
lihc_tcga	TCGA-FV-A3R2-01	1	0	1	0
lihc_tcga	TCGA-FV-A3R3-01	1	1	0	0
lihc_tcga	TCGA-G3-A3CH-01	1	0	0	1
lihc_tcga	TCGA-DD-A3A9-01	1	0	1	0
lihc_tcga	TCGA-DD-A4NA-01	0	0	0	0
lihc_tcga	TCGA-DD-A4NB-01	0	0	0	0
lihc_tcga	TCGA-DD-A4ND-01	0	0	0	0
lihc_tcga	TCGA-ED-A459-01	1	0	1	0
lihc_tcga	TCGA-ED-A4XI-01	0	0	0	0
lihc_tcga	TCGA-FV-A495-01	0	0	0	0
lihc_tcga	TCGA-FV-A496-01	1	0	1	0
lihc_tcga	TCGA-FV-A4ZP-01	1	0	1	0
lihc_tcga	TCGA-FV-A4ZQ-01	1	0	1	0
lihc_tcga	TCGA-MR-A520-01	0	0	0	0
lihc_tcga	TCGA-BW-A5NO-01	1	0	1	0
lihc_tcga	TCGA-BW-A5NP-01	0	0	0	0
lihc_tcga	TCGA-BW-A5NQ-01	1	1	1	0
lihc_tcga	TCGA-DD-A4NF-01	0	0	0	0
lihc_tcga	TCGA-DD-A4NH-01	0	0	0	0
lihc_tcga	TCGA-DD-A4NI-01	0	0	0	0
lihc_tcga	TCGA-DD-A4NJ-01	0	0	0	0
lihc_tcga	TCGA-ED-A5KG-01	0	0	0	0
lihc_tcga	TCGA-G3-A5SI-01	0	0	0	0
lihc_tcga	TCGA-G3-A5SJ-01	1	0	1	1
lihc_tcga	TCGA-G3-A5SL-01	0	0	0	0
lihc_tcga	TCGA-HP-A5MZ-01	1	0	0	1
lihc_tcga	TCGA-PD-A5DF-01	0	0	0	0
lihc_tcga	TCGA-BC-A5W4-01	1	0	1	0
lihc_tcga	TCGA-CC-A5UC-01	0	0	0	0
lihc_tcga	TCGA-CC-A5UD-01	1	1	1	0
lihc_tcga	TCGA-CC-A5UE-01	1	0	1	1
lihc_tcga	TCGA-DD-A4NK-01	0	0	0	0
lihc_tcga	TCGA-DD-A4NL-01	0	0	0	0
lihc_tcga	TCGA-DD-A4NN-01	0	0	0	0
lihc_tcga	TCGA-DD-A4NO-01	0	0	0	0
lihc_tcga	TCGA-DD-A4NP-01	0	0	0	0
lihc_tcga	TCGA-DD-A4NQ-01	0	0	0	0
lihc_tcga	TCGA-G3-A5SM-01	1	0	1	0
lihc_tcga	TCGA-HP-A5N0-01	0	0	0	0
lihc_tcga	TCGA-K7-A5RF-01	0	0	0	0
lihc_tcga	TCGA-K7-A5RG-01	1	0	1	0
lihc_tcga	TCGA-NI-A4U2-01	0	0	0	0
lihc_tcga	TCGA-BC-A69H-01	1	0	1	1
lihc_tcga	TCGA-DD-A4NR-01	1	1	0	0
lihc_tcga	TCGA-DD-A4NS-01	0	0	0	0
lihc_tcga	TCGA-DD-A4NV-01	0	0	0	0
lihc_tcga	TCGA-ED-A627-01	0	0	0	0
lihc_tcga	TCGA-ED-A66X-01	1	0	0	1
lihc_tcga	TCGA-ED-A66Y-01	0	0	0	0
lihc_tcga	TCGA-GJ-A6C0-01	0	0	0	0
lihc_tcga	TCGA-K7-A6G5-01	1	0	0	1
lihc_tcga	TCGA-LG-A6GG-01	1	1	0	0
lihc_tcga	TCGA-DD-A73A-01	1	0	0	1
lihc_tcga	TCGA-DD-A73B-01	0	0	0	0
lihc_tcga	TCGA-DD-A73D-01	0	0	0	0
lihc_tcga	TCGA-DD-A73E-01	0	0	0	0
lihc_tcga	TCGA-DD-A73F-01	0	0	0	0
lihc_tcga	TCGA-DD-A73G-01	0	0	0	0
lihc_tcga	TCGA-MI-A75C-01	0	0	0	0
lihc_tcga	TCGA-MI-A75E-01	0	0	0	0
lihc_tcga	TCGA-MI-A75G-01	1	0	1	0
lihc_tcga	TCGA-MI-A75H-01	0	0	0	0
lihc_tcga	TCGA-MI-A75I-01	1	0	1	0
lihc_tcga	TCGA-O8-A75V-01	1	0	0	1
lihc_tcga	TCGA-QA-A7B7-01	1	0	1	0
lihc_tcga	TCGA-RC-A6M3-01	0	0	0	0
lihc_tcga	TCGA-RC-A6M4-01	1	1	0	1
lihc_tcga	TCGA-RC-A6M5-01	0	0	0	0
lihc_tcga	TCGA-RC-A6M6-01	1	0	1	1
lihc_tcga	TCGA-T1-A6J8-01	1	0	1	0
lihc_tcga	TCGA-CC-A7IF-01	0	0	0	0
lihc_tcga	TCGA-CC-A7IG-01	1	0	1	0
lihc_tcga	TCGA-CC-A7IH-01	1	0	0	1
lihc_tcga	TCGA-CC-A7II-01	1	0	1	1
lihc_tcga	TCGA-DD-A73C-01	0	0	0	0
lihc_tcga	TCGA-G3-A6UC-01	0	0	0	0
lihc_tcga	TCGA-KR-A7K7-01	1	0	0	1
lihc_tcga	TCGA-KR-A7K8-01	1	1	0	1
lihc_tcga	TCGA-UB-A7ME-01	1	1	0	0
lihc_tcga	TCGA-UB-A7MF-01	1	0	1	0
lihc_tcga	TCGA-CC-A7IJ-01	1	0	1	0
lihc_tcga	TCGA-CC-A7IK-01	1	0	1	1
lihc_tcga	TCGA-CC-A7IL-01	0	0	0	0
lihc_tcga	TCGA-ED-A7PY-01	0	0	0	0
lihc_tcga	TCGA-ED-A7PZ-01	1	0	1	0
lihc_tcga	TCGA-G3-A7M5-01	0	0	0	0
lihc_tcga	TCGA-G3-A7M6-01	1	0	1	0
lihc_tcga	TCGA-G3-A7M8-01	0	0	0	0
lihc_tcga	TCGA-KR-A7K0-01	0	0	0	0
lihc_tcga	TCGA-KR-A7K2-01	1	0	0	1
lihc_tcga	TCGA-RC-A7S9-01	0	0	0	0
lihc_tcga	TCGA-RG-A7D4-01	1	0	1	0
lihc_tcga	TCGA-UB-A7MA-01	0	0	0	0
lihc_tcga	TCGA-UB-A7MB-01	1	0	1	0
lihc_tcga	TCGA-UB-A7MC-01	1	0	1	0
lihc_tcga	TCGA-ED-A7PX-01	0	0	0	0
lihc_tcga	TCGA-ED-A7XO-01	1	0	1	0
lihc_tcga	TCGA-ED-A7XP-01	1	0	1	0
lihc_tcga	TCGA-ED-A82E-01	0	0	0	0
lihc_tcga	TCGA-G3-A7M7-01	0	0	0	0
lihc_tcga	TCGA-G3-A7M9-01	1	0	1	0
lihc_tcga	TCGA-RC-A7SB-01	1	0	1	0
lihc_tcga	TCGA-RC-A7SF-01	0	0	0	0
lihc_tcga	TCGA-RC-A7SK-01	1	0	1	1
lihc_tcga	TCGA-UB-A7MD-01	1	1	1	0
lihc_tcga	TCGA-CC-A8HT-01	1	0	1	0
lihc_tcga	TCGA-CC-A8HU-01	1	0	1	0
lihc_tcga	TCGA-CC-A8HV-01	1	0	1	0
lihc_tcga	TCGA-ED-A8O5-01	0	0	0	0
lihc_tcga	TCGA-ED-A8O6-01	0	0	0	0
lihc_tcga	TCGA-MR-A8JO-01	1	0	0	1
lihc_tcga	TCGA-NI-A8LF-01	1	0	1	0
lihc_tcga	TCGA-XR-A8TE-01	0	0	0	0
lihc_tcga	TCGA-XR-A8TF-01	1	1	0	0
lihc_tcga	TCGA-XR-A8TG-01	1	0	1	0
lihc_tcga	TCGA-2V-A95S-01	1	1	0	0
lihc_tcga	TCGA-5C-A9VG-01	0	0	0	0
lihc_tcga	TCGA-5C-A9VH-01	0	0	0	0
lihc_tcga	TCGA-BC-A8YO-01	1	0	1	0
lihc_tcga	TCGA-CC-A9FS-01	1	1	0	0
lihc_tcga	TCGA-CC-A9FU-01	0	0	0	0
lihc_tcga	TCGA-CC-A9FV-01	0	0	0	0
lihc_tcga	TCGA-CC-A9FW-01	0	0	0	0
lihc_tcga	TCGA-DD-AA3A-01	0	0	0	0
lihc_tcga	TCGA-G3-AAV0-01	0	0	0	0
lihc_tcga	TCGA-G3-AAV2-01	0	0	0	0
lihc_tcga	TCGA-G3-AAV3-01	0	0	0	0
lihc_tcga	TCGA-G3-AAV5-01	1	0	0	1
lihc_tcga	TCGA-G3-AAV6-01	0	0	0	0
lihc_tcga	TCGA-GJ-A9DB-01	0	0	0	0
lihc_tcga	TCGA-LG-A9QC-01	0	0	0	0
lihc_tcga	TCGA-WQ-A9G7-01	0	0	0	0
lihc_tcga	TCGA-YA-A8S7-01	1	0	1	1
lihc_tcga	TCGA-ZP-A9D0-01	0	0	0	0
lihc_tcga	TCGA-ZP-A9D4-01	1	0	0	1
lihc_tcga	TCGA-ZS-A9CD-01	1	1	0	1
lihc_tcga	TCGA-ZS-A9CE-01	0	0	0	0
lihc_tcga	TCGA-ZS-A9CG-01	0	0	0	0
lihc_tcga	TCGA-2Y-A9GS-01	1	0	1	0
lihc_tcga	TCGA-2Y-A9GT-01	0	0	0	0
lihc_tcga	TCGA-2Y-A9GU-01	0	0	0	0
lihc_tcga	TCGA-2Y-A9GV-01	0	0	0	0
lihc_tcga	TCGA-2Y-A9GW-01	0	0	0	0
lihc_tcga	TCGA-2Y-A9GX-01	0	0	0	0
lihc_tcga	TCGA-2Y-A9GY-01	1	0	1	0
lihc_tcga	TCGA-2Y-A9H0-01	0	0	0	0
lihc_tcga	TCGA-2Y-A9H1-01	0	0	0	0
lihc_tcga	TCGA-2Y-A9H2-01	1	0	0	1
lihc_tcga	TCGA-2Y-A9H3-01	0	0	0	0
lihc_tcga	TCGA-2Y-A9H4-01	1	0	1	0
lihc_tcga	TCGA-2Y-A9H5-01	0	0	0	0
lihc_tcga	TCGA-4R-AA8I-01	1	0	1	0
lihc_tcga	TCGA-5R-AA1D-01	0	0	0	0
lihc_tcga	TCGA-CC-A7IE-01	1	0	0	1
lihc_tcga	TCGA-ED-A97K-01	1	0	0	1
lihc_tcga	TCGA-G3-AAUZ-01	0	0	0	0
lihc_tcga	TCGA-G3-AAV1-01	0	0	0	0
lihc_tcga	TCGA-G3-AAV4-01	1	0	1	0
lihc_tcga	TCGA-G3-AAV7-01	1	0	1	0
lihc_tcga	TCGA-GJ-A3OU-01	1	0	1	0
lihc_tcga	TCGA-K7-AAU7-01	1	0	1	0
lihc_tcga	TCGA-LG-A9QD-01	1	0	0	1
lihc_tcga	TCGA-RC-A7SH-01	1	0	1	0
lihc_tcga	TCGA-UB-AA0U-01	0	0	0	0
lihc_tcga	TCGA-UB-AA0V-01	0	0	0	0
lihc_tcga	TCGA-ZP-A9CV-01	0	0	0	0
lihc_tcga	TCGA-ZP-A9CY-01	0	0	0	0
lihc_tcga	TCGA-ZP-A9CZ-01	0	0	0	0
lihc_tcga	TCGA-ZP-A9D1-01	0	0	0	0
lihc_tcga	TCGA-ZP-A9D2-01	1	0	1	0
lihc_tcga	TCGA-ZS-A9CF-01	0	0	0	0
lihc_tcga	TCGA-2Y-A9GZ-01	0	0	0	0
lihc_tcga	TCGA-2Y-A9H6-01	0	0	0	0
lihc_tcga	TCGA-2Y-A9H7-01	0	0	0	0
lihc_tcga	TCGA-2Y-A9H8-01	1	0	1	0
lihc_tcga	TCGA-2Y-A9H9-01	0	0	0	0
lihc_tcga	TCGA-2Y-A9HA-01	1	0	1	0
lihc_tcga	TCGA-2Y-A9HB-01	0	0	0	0
lihc_tcga	TCGA-3K-AAZ8-01	0	0	0	0
lihc_tcga	TCGA-5C-AAPD-01	1	0	1	0
lihc_tcga	TCGA-DD-AADP-01	1	1	0	0
lihc_tcga	TCGA-DD-AADV-01	1	0	1	0
lihc_tcga	TCGA-DD-AADW-01	1	0	1	0
lihc_tcga	TCGA-DD-AAEG-01	1	1	0	0
lihc_tcga	TCGA-WJ-A86L-01	1	0	1	0
lihc_tcga	TCGA-WX-AA44-01	1	0	1	0
lihc_tcga	TCGA-WX-AA46-01	0	0	0	0
lihc_tcga	TCGA-WX-AA47-01	1	0	0	1
lihc_tcga	TCGA-XR-A8TD-01	0	0	0	0
lihc_tcga	TCGA-5R-AA1C-01	0	0	0	0
lihc_tcga	TCGA-5R-AAAM-01	1	0	0	1
lihc_tcga	TCGA-DD-AAC8-01	0	0	0	0
lihc_tcga	TCGA-DD-AAC9-01	1	0	1	0
lihc_tcga	TCGA-DD-AACA-01	0	0	0	0
lihc_tcga	TCGA-DD-AACB-01	1	0	1	0
lihc_tcga	TCGA-DD-AACC-01	0	0	0	0
lihc_tcga	TCGA-DD-AACD-01	1	0	0	1
lihc_tcga	TCGA-DD-AACE-01	1	0	1	0
lihc_tcga	TCGA-DD-AACF-01	1	0	1	0
lihc_tcga	TCGA-DD-AACG-01	1	1	1	0
lihc_tcga	TCGA-DD-AACH-01	0	0	0	0
lihc_tcga	TCGA-DD-AACI-01	0	0	0	0
lihc_tcga	TCGA-DD-AACJ-01	0	0	0	0
lihc_tcga	TCGA-DD-AACK-01	1	1	0	0
lihc_tcga	TCGA-DD-AACL-01	1	0	1	0
lihc_tcga	TCGA-DD-AACM-01	1	0	1	0
lihc_tcga	TCGA-DD-AACN-01	0	0	0	0
lihc_tcga	TCGA-DD-AACO-01	0	0	0	0
lihc_tcga	TCGA-DD-AACP-01	1	1	0	0
lihc_tcga	TCGA-DD-AACQ-01	1	0	1	0
lihc_tcga	TCGA-DD-AACS-01	1	0	1	0
lihc_tcga	TCGA-DD-AACT-01	0	0	0	0
lihc_tcga	TCGA-DD-AACU-01	1	0	1	0
lihc_tcga	TCGA-DD-AACV-01	1	0	1	0
lihc_tcga	TCGA-DD-AACW-01	1	0	0	1
lihc_tcga	TCGA-DD-AACX-01	0	0	0	0
lihc_tcga	TCGA-DD-AACY-01	1	0	0	1
lihc_tcga	TCGA-DD-AACZ-01	1	0	1	1
lihc_tcga	TCGA-DD-AAD0-01	0	0	0	0
lihc_tcga	TCGA-DD-AAD1-01	1	0	0	1
lihc_tcga	TCGA-DD-AAD2-01	0	0	0	0
lihc_tcga	TCGA-DD-AAD3-01	1	0	1	0
lihc_tcga	TCGA-DD-AAD5-01	1	0	1	1
lihc_tcga	TCGA-DD-AAD6-01	1	0	0	1
lihc_tcga	TCGA-DD-AAD8-01	1	0	1	0
lihc_tcga	TCGA-DD-AADA-01	0	0	0	0
lihc_tcga	TCGA-DD-AADB-01	1	0	1	0
lihc_tcga	TCGA-DD-AADC-01	1	0	1	0
lihc_tcga	TCGA-DD-AADD-01	1	0	1	0
lihc_tcga	TCGA-DD-AADE-01	1	0	1	0
lihc_tcga	TCGA-DD-AADF-01	0	0	0	0
lihc_tcga	TCGA-DD-AADG-01	0	0	0	0
lihc_tcga	TCGA-DD-AADI-01	0	0	0	0
lihc_tcga	TCGA-DD-AADJ-01	0	0	0	0
lihc_tcga	TCGA-DD-AADK-01	1	0	0	1
lihc_tcga	TCGA-DD-AADL-01	1	0	1	0
lihc_tcga	TCGA-DD-AADM-01	0	0	0	0
lihc_tcga	TCGA-DD-AADN-01	1	0	1	1
lihc_tcga	TCGA-DD-AADO-01	1	0	0	1
lihc_tcga	TCGA-DD-AADQ-01	0	0	0	0
lihc_tcga	TCGA-DD-AADR-01	1	1	1	1
lihc_tcga	TCGA-DD-AADS-01	0	0	0	0
lihc_tcga	TCGA-DD-AADU-01	1	0	0	1
lihc_tcga	TCGA-DD-AADY-01	0	0	0	0
lihc_tcga	TCGA-DD-AAE0-01	1	0	1	0
lihc_tcga	TCGA-DD-AAE1-01	0	0	0	0
lihc_tcga	TCGA-DD-AAE2-01	0	0	0	0
lihc_tcga	TCGA-DD-AAE3-01	0	0	0	0
lihc_tcga	TCGA-DD-AAE4-01	0	0	0	0
lihc_tcga	TCGA-DD-AAE6-01	1	0	1	0
lihc_tcga	TCGA-DD-AAE7-01	1	1	0	0
lihc_tcga	TCGA-DD-AAE8-01	1	0	1	0
lihc_tcga	TCGA-DD-AAE9-01	0	0	0	0
lihc_tcga	TCGA-DD-AAEA-01	1	0	1	0
lihc_tcga	TCGA-DD-AAEB-01	0	0	0	0
lihc_tcga	TCGA-DD-AAED-01	1	0	1	0
lihc_tcga	TCGA-DD-AAEE-01	0	0	0	0
lihc_tcga	TCGA-DD-AAEH-01	0	0	0	0
lihc_tcga	TCGA-DD-AAEI-01	1	0	1	1
lihc_tcga	TCGA-DD-AAEK-01	1	0	0	1
lihc_tcga	TCGA-DD-AAVP-01	0	0	0	0
lihc_tcga	TCGA-DD-AAVQ-01	0	0	0	0
lihc_tcga	TCGA-DD-AAVR-01	0	0	0	0
lihc_tcga	TCGA-DD-AAVS-01	1	0	0	1
lihc_tcga	TCGA-DD-AAVU-01	1	0	1	1
lihc_tcga	TCGA-DD-AAVV-01	1	0	1	0
lihc_tcga	TCGA-DD-AAVW-01	0	0	0	0
lihc_tcga	TCGA-DD-AAVX-01	1	1	0	0
lihc_tcga	TCGA-DD-AAVY-01	0	0	0	0
lihc_tcga	TCGA-DD-AAVZ-01	0	0	0	0
lihc_tcga	TCGA-DD-AAW0-01	0	0	0	0
lihc_tcga	TCGA-DD-AAW1-01	0	0	0	0
lihc_tcga	TCGA-DD-AAW2-01	0	0	0	0
lihc_tcga	TCGA-DD-AAW3-01	1	0	0	1
lihc_tcga	TCGA-WQ-AB4B-01	1	0	1	0

## Sheet: LUAD
Mutations of KRAS, TP53 and KMT2C in LUAD samples from TCGA.
studyID	sampleId	Altered	KRAS	TP53	KMT2C
luad_tcga	TCGA-05-4384-01	1	0	1	1
luad_tcga	TCGA-05-4390-01	1	1	0	0
luad_tcga	TCGA-05-4425-01	0	0	0	0
luad_tcga	TCGA-38-4631-01	0	0	0	0
luad_tcga	TCGA-38-4632-01	1	0	1	1
luad_tcga	TCGA-38-6178-01	1	0	1	0
luad_tcga	TCGA-44-6145-01	1	1	0	1
luad_tcga	TCGA-44-6146-01	1	1	0	0
luad_tcga	TCGA-44-6147-01	1	0	1	0
luad_tcga	TCGA-49-4488-01	1	0	1	0
luad_tcga	TCGA-50-5931-01	1	0	1	1
luad_tcga	TCGA-50-5932-01	1	1	0	0
luad_tcga	TCGA-50-5933-01	1	1	1	0
luad_tcga	TCGA-50-5935-01	0	0	0	0
luad_tcga	TCGA-50-5941-01	1	1	1	0
luad_tcga	TCGA-50-5942-01	0	0	0	0
luad_tcga	TCGA-50-5944-01	1	0	1	0
luad_tcga	TCGA-50-6593-01	1	0	1	0
luad_tcga	TCGA-55-6543-01	0	0	0	0
luad_tcga	TCGA-67-6215-01	0	0	0	0
luad_tcga	TCGA-67-6216-01	0	0	0	0
luad_tcga	TCGA-67-6217-01	1	0	0	1
luad_tcga	TCGA-73-4658-01	0	0	0	0
luad_tcga	TCGA-73-4676-01	1	0	1	0
luad_tcga	TCGA-75-5122-01	1	1	0	0
luad_tcga	TCGA-75-5126-01	1	1	0	1
luad_tcga	TCGA-75-6203-01	0	0	0	0
luad_tcga	TCGA-75-6205-01	0	0	0	0
luad_tcga	TCGA-75-6207-01	1	0	1	0
luad_tcga	TCGA-75-6211-01	1	1	1	0
luad_tcga	TCGA-75-6212-01	0	0	0	0
luad_tcga	TCGA-86-6562-01	0	0	0	0
luad_tcga	TCGA-05-4396-01	1	0	1	0
luad_tcga	TCGA-05-4405-01	1	1	1	0
luad_tcga	TCGA-05-4410-01	1	0	1	0
luad_tcga	TCGA-05-4415-01	1	1	1	0
luad_tcga	TCGA-05-4417-01	1	1	0	0
luad_tcga	TCGA-05-4424-01	1	0	1	1
luad_tcga	TCGA-05-4433-01	1	1	0	0
luad_tcga	TCGA-44-6774-01	1	0	1	0
luad_tcga	TCGA-44-6775-01	1	0	1	0
luad_tcga	TCGA-44-6776-01	1	1	0	0
luad_tcga	TCGA-44-6777-01	1	1	1	1
luad_tcga	TCGA-44-6779-01	1	0	1	0
luad_tcga	TCGA-49-4487-01	1	0	1	0
luad_tcga	TCGA-49-4490-01	1	0	1	0
luad_tcga	TCGA-49-4512-01	0	0	0	0
luad_tcga	TCGA-49-4514-01	1	0	1	0
luad_tcga	TCGA-49-6742-01	0	0	0	0
luad_tcga	TCGA-49-6744-01	1	1	0	1
luad_tcga	TCGA-49-6745-01	1	1	0	0
luad_tcga	TCGA-49-6767-01	1	0	1	0
luad_tcga	TCGA-50-5044-01	0	0	0	0
luad_tcga	TCGA-50-5051-01	1	1	0	0
luad_tcga	TCGA-50-5072-01	0	0	0	0
luad_tcga	TCGA-50-6595-01	1	0	1	0
luad_tcga	TCGA-50-6597-01	0	0	0	0
luad_tcga	TCGA-55-6642-01	1	1	0	0
luad_tcga	TCGA-55-6712-01	1	0	1	0
luad_tcga	TCGA-71-6725-01	0	0	0	0
luad_tcga	TCGA-91-6828-01	1	1	0	0
luad_tcga	TCGA-91-6829-01	1	0	1	1
luad_tcga	TCGA-91-6835-01	1	1	0	0
luad_tcga	TCGA-49-6761-01	1	1	0	0
luad_tcga	TCGA-50-6673-01	1	0	1	0
luad_tcga	TCGA-55-6970-01	1	1	0	0
luad_tcga	TCGA-55-6971-01	0	0	0	0
luad_tcga	TCGA-55-6972-01	1	0	0	1
luad_tcga	TCGA-55-6978-01	0	0	0	0
luad_tcga	TCGA-55-6979-01	1	0	1	0
luad_tcga	TCGA-55-6980-01	0	0	0	0
luad_tcga	TCGA-55-6981-01	1	0	0	1
luad_tcga	TCGA-55-6982-01	0	0	0	0
luad_tcga	TCGA-55-6983-01	1	1	0	0
luad_tcga	TCGA-55-6985-01	1	0	1	1
luad_tcga	TCGA-55-6986-01	0	0	0	0
luad_tcga	TCGA-75-6214-01	1	0	1	0
luad_tcga	TCGA-75-7025-01	0	0	0	0
luad_tcga	TCGA-75-7027-01	1	1	0	0
luad_tcga	TCGA-75-7030-01	1	1	0	0
luad_tcga	TCGA-75-7031-01	1	0	1	1
luad_tcga	TCGA-80-5607-01	0	0	0	0
luad_tcga	TCGA-80-5608-01	1	1	0	0
luad_tcga	TCGA-86-6851-01	1	0	1	1
luad_tcga	TCGA-91-6840-01	1	0	1	0
luad_tcga	TCGA-91-6847-01	1	0	1	0
luad_tcga	TCGA-91-6849-01	1	1	0	0
luad_tcga	TCGA-95-7039-01	1	1	1	0
luad_tcga	TCGA-95-7043-01	1	0	1	1
luad_tcga	TCGA-50-7109-01	1	1	0	0
luad_tcga	TCGA-55-7281-01	1	1	0	0
luad_tcga	TCGA-55-7283-01	1	1	1	0
luad_tcga	TCGA-55-7573-01	1	0	1	0
luad_tcga	TCGA-55-7574-01	1	0	1	0
luad_tcga	TCGA-78-7143-01	1	0	1	0
luad_tcga	TCGA-78-7145-01	1	1	1	0
luad_tcga	TCGA-78-7147-01	1	0	1	0
luad_tcga	TCGA-78-7148-01	1	1	0	1
luad_tcga	TCGA-78-7149-01	1	0	1	0
luad_tcga	TCGA-78-7150-01	1	0	1	0
luad_tcga	TCGA-78-7152-01	0	0	0	0
luad_tcga	TCGA-78-7153-01	0	0	0	0
luad_tcga	TCGA-78-7154-01	1	0	1	1
luad_tcga	TCGA-78-7155-01	1	0	1	0
luad_tcga	TCGA-78-7156-01	0	0	0	0
luad_tcga	TCGA-78-7158-01	0	0	0	0
luad_tcga	TCGA-78-7159-01	0	0	0	0
luad_tcga	TCGA-78-7160-01	1	1	0	0
luad_tcga	TCGA-78-7161-01	1	1	0	0
luad_tcga	TCGA-93-7348-01	0	0	0	0
luad_tcga	TCGA-97-7546-01	0	0	0	0
luad_tcga	TCGA-97-7552-01	0	0	0	0
luad_tcga	TCGA-97-7553-01	1	0	1	0
luad_tcga	TCGA-97-7554-01	1	1	1	0
luad_tcga	TCGA-99-7458-01	1	1	1	1
luad_tcga	TCGA-44-7659-01	1	1	0	1
luad_tcga	TCGA-44-7662-01	1	0	1	0
luad_tcga	TCGA-44-7670-01	1	0	1	1
luad_tcga	TCGA-44-7671-01	1	1	0	0
luad_tcga	TCGA-44-7672-01	1	1	0	0
luad_tcga	TCGA-53-7626-01	1	0	1	1
luad_tcga	TCGA-55-7576-01	1	1	1	0
luad_tcga	TCGA-64-1679-01	1	0	1	0
luad_tcga	TCGA-64-1681-01	1	0	1	0
luad_tcga	TCGA-78-7162-01	0	0	0	0
luad_tcga	TCGA-78-7163-01	0	0	0	0
luad_tcga	TCGA-78-7166-01	1	1	0	0
luad_tcga	TCGA-78-7167-01	1	1	0	0
luad_tcga	TCGA-78-7535-01	1	0	1	0
luad_tcga	TCGA-78-7536-01	1	0	1	1
luad_tcga	TCGA-78-7537-01	0	0	0	0
luad_tcga	TCGA-78-7539-01	1	1	0	0
luad_tcga	TCGA-78-7540-01	1	1	1	0
luad_tcga	TCGA-78-7542-01	1	0	1	0
luad_tcga	TCGA-78-7633-01	0	0	0	0
luad_tcga	TCGA-86-7713-01	1	1	0	0
luad_tcga	TCGA-95-7567-01	1	1	1	1
luad_tcga	TCGA-53-7813-01	1	1	0	0
luad_tcga	TCGA-55-7724-01	1	0	1	0
luad_tcga	TCGA-55-7725-01	1	1	0	0
luad_tcga	TCGA-55-7726-01	1	1	1	0
luad_tcga	TCGA-55-7727-01	1	0	1	0
luad_tcga	TCGA-55-7815-01	1	1	0	1
luad_tcga	TCGA-55-7903-01	1	0	1	0
luad_tcga	TCGA-55-7907-01	1	1	1	1
luad_tcga	TCGA-55-7911-01	1	1	1	0
luad_tcga	TCGA-55-7914-01	1	1	0	0
luad_tcga	TCGA-69-7760-01	1	0	1	1
luad_tcga	TCGA-69-7761-01	0	0	0	0
luad_tcga	TCGA-69-7763-01	0	0	0	0
luad_tcga	TCGA-69-7764-01	0	0	0	0
luad_tcga	TCGA-69-7765-01	1	0	1	0
luad_tcga	TCGA-86-7714-01	0	0	0	0
luad_tcga	TCGA-91-7771-01	0	0	0	0
luad_tcga	TCGA-97-7937-01	1	0	0	1
luad_tcga	TCGA-97-7938-01	1	1	1	1
luad_tcga	TCGA-55-7728-01	1	1	0	0
luad_tcga	TCGA-69-7980-01	1	1	1	0
luad_tcga	TCGA-73-7498-01	1	1	0	0
luad_tcga	TCGA-73-7499-01	1	0	1	0
luad_tcga	TCGA-93-7347-01	1	1	0	0
luad_tcga	TCGA-95-7947-01	1	0	1	1
luad_tcga	TCGA-95-7948-01	0	0	0	0
luad_tcga	TCGA-97-7941-01	1	1	0	0
luad_tcga	TCGA-35-3615-01	1	1	0	0
luad_tcga	TCGA-44-2655-01	0	0	0	0
luad_tcga	TCGA-44-2656-01	1	0	1	1
luad_tcga	TCGA-44-2659-01	1	0	1	0
luad_tcga	TCGA-44-2662-01	1	0	1	0
luad_tcga	TCGA-44-2665-01	0	0	0	0
luad_tcga	TCGA-44-2666-01	1	0	1	0
luad_tcga	TCGA-55-1592-01	1	1	1	1
luad_tcga	TCGA-55-1594-01	1	0	1	1
luad_tcga	TCGA-55-1596-01	1	0	1	0
luad_tcga	TCGA-64-1676-01	1	0	1	0
luad_tcga	TCGA-64-1677-01	1	1	1	1
luad_tcga	TCGA-64-1678-01	1	0	1	1
luad_tcga	TCGA-64-1680-01	0	0	0	0
luad_tcga	TCGA-67-3771-01	1	0	1	1
luad_tcga	TCGA-67-3772-01	0	0	0	0
luad_tcga	TCGA-67-3773-01	1	1	0	0
luad_tcga	TCGA-67-3774-01	1	1	0	0
luad_tcga	TCGA-05-4249-01	1	1	0	1
luad_tcga	TCGA-44-2657-01	1	1	0	1
luad_tcga	TCGA-44-2661-01	0	0	0	0
luad_tcga	TCGA-44-3919-01	0	0	0	0
luad_tcga	TCGA-44-4112-01	0	0	0	0
luad_tcga	TCGA-05-4382-01	1	0	1	0
luad_tcga	TCGA-05-4389-01	0	0	0	0
luad_tcga	TCGA-05-4395-01	1	1	1	0
luad_tcga	TCGA-05-4398-01	1	0	1	0
luad_tcga	TCGA-05-4402-01	1	0	1	0
luad_tcga	TCGA-05-4403-01	1	1	0	0
luad_tcga	TCGA-05-4418-01	1	1	0	0
luad_tcga	TCGA-05-4420-01	1	0	1	0
luad_tcga	TCGA-05-4422-01	0	0	0	0
luad_tcga	TCGA-05-4426-01	1	0	1	0
luad_tcga	TCGA-05-4430-01	1	1	1	0
luad_tcga	TCGA-05-4432-01	1	0	1	0
luad_tcga	TCGA-38-4626-01	1	1	0	0
luad_tcga	TCGA-38-4627-01	0	0	0	0
luad_tcga	TCGA-38-4628-01	1	0	0	1
luad_tcga	TCGA-44-3396-01	1	0	1	1
luad_tcga	TCGA-49-4486-01	0	0	0	0
luad_tcga	TCGA-49-4494-01	0	0	0	0
luad_tcga	TCGA-49-4501-01	0	0	0	0
luad_tcga	TCGA-49-4505-01	1	1	1	0
luad_tcga	TCGA-49-4506-01	1	0	0	1
luad_tcga	TCGA-49-4507-01	1	1	0	0
luad_tcga	TCGA-49-4510-01	1	1	0	0
luad_tcga	TCGA-73-4659-01	1	1	0	0
luad_tcga	TCGA-73-4662-01	1	1	0	0
luad_tcga	TCGA-73-4675-01	0	0	0	0
luad_tcga	TCGA-05-5420-01	0	0	0	0
luad_tcga	TCGA-05-5423-01	1	0	1	0
luad_tcga	TCGA-05-5428-01	1	0	1	1
luad_tcga	TCGA-05-5429-01	0	0	0	0
luad_tcga	TCGA-05-5715-01	0	0	0	0
luad_tcga	TCGA-44-5645-01	1	0	1	0
luad_tcga	TCGA-50-5049-01	1	0	1	1
luad_tcga	TCGA-50-5055-01	0	0	0	0
luad_tcga	TCGA-50-5068-01	1	0	1	0
luad_tcga	TCGA-50-5936-01	1	1	0	0
luad_tcga	TCGA-50-5939-01	1	0	1	1
luad_tcga	TCGA-64-5774-01	1	1	0	0
luad_tcga	TCGA-64-5775-01	1	1	1	0
luad_tcga	TCGA-64-5778-01	1	1	1	0
luad_tcga	TCGA-64-5781-01	1	0	0	1
luad_tcga	TCGA-75-5146-01	1	0	1	1
luad_tcga	TCGA-75-5147-01	1	0	1	0

## Sheet: LUSC
Mutations of PIK3CA, TP53 and KMT2D in LUSC samples from TCGA.
studyID	sampleId	Altered	PIK3CA	TP53	KMT2D
lusc_tcga	TCGA-18-5592-01	1	0	1	0
lusc_tcga	TCGA-18-5595-01	1	1	0	0
lusc_tcga	TCGA-21-5782-01	1	1	1	0
lusc_tcga	TCGA-21-5784-01	1	0	1	0
lusc_tcga	TCGA-21-5786-01	1	0	1	0
lusc_tcga	TCGA-21-5787-01	1	0	1	0
lusc_tcga	TCGA-22-5471-01	1	1	1	0
lusc_tcga	TCGA-22-5472-01	0	0	0	0
lusc_tcga	TCGA-22-5473-01	1	1	1	1
lusc_tcga	TCGA-22-5474-01	1	1	1	0
lusc_tcga	TCGA-22-5477-01	1	1	1	1
lusc_tcga	TCGA-22-5478-01	1	0	1	0
lusc_tcga	TCGA-22-5480-01	1	0	1	0
lusc_tcga	TCGA-22-5482-01	1	1	1	1
lusc_tcga	TCGA-22-5485-01	1	0	1	0
lusc_tcga	TCGA-22-5489-01	1	1	1	0
lusc_tcga	TCGA-22-5491-01	1	1	1	0
lusc_tcga	TCGA-22-5492-01	1	0	1	0
lusc_tcga	TCGA-34-5234-01	0	0	0	0
lusc_tcga	TCGA-37-5819-01	1	1	1	0
lusc_tcga	TCGA-43-5668-01	1	1	1	0
lusc_tcga	TCGA-56-5897-01	1	0	1	1
lusc_tcga	TCGA-56-5898-01	1	0	1	0
lusc_tcga	TCGA-22-4593-01	1	0	1	0
lusc_tcga	TCGA-33-6737-01	1	0	1	0
lusc_tcga	TCGA-34-5231-01	1	1	1	0
lusc_tcga	TCGA-34-5232-01	1	1	1	0
lusc_tcga	TCGA-34-5236-01	1	1	1	0
lusc_tcga	TCGA-34-5239-01	1	0	1	0
lusc_tcga	TCGA-34-5927-01	1	0	1	1
lusc_tcga	TCGA-34-5928-01	1	0	1	1
lusc_tcga	TCGA-34-5929-01	1	1	1	0
lusc_tcga	TCGA-39-5019-01	1	1	1	0
lusc_tcga	TCGA-39-5022-01	1	1	0	0
lusc_tcga	TCGA-39-5024-01	1	0	1	0
lusc_tcga	TCGA-39-5027-01	1	1	1	1
lusc_tcga	TCGA-43-6143-01	1	1	1	0
lusc_tcga	TCGA-43-6647-01	0	0	0	0
lusc_tcga	TCGA-43-6770-01	1	1	1	0
lusc_tcga	TCGA-43-6771-01	0	0	0	0
lusc_tcga	TCGA-46-6025-01	1	1	1	0
lusc_tcga	TCGA-46-6026-01	1	0	1	0
lusc_tcga	TCGA-56-6545-01	1	0	1	1
lusc_tcga	TCGA-56-6546-01	1	0	1	0
lusc_tcga	TCGA-60-2709-01	1	1	0	0
lusc_tcga	TCGA-63-6202-01	1	0	1	1
lusc_tcga	TCGA-70-6722-01	1	1	0	1
lusc_tcga	TCGA-70-6723-01	1	1	1	0
lusc_tcga	TCGA-85-6175-01	0	0	0	0
lusc_tcga	TCGA-85-6560-01	1	1	1	0
lusc_tcga	TCGA-85-6561-01	1	0	1	0
lusc_tcga	TCGA-21-1070-01	1	1	0	0
lusc_tcga	TCGA-21-1071-01	1	1	0	0
lusc_tcga	TCGA-21-1076-01	1	1	1	0
lusc_tcga	TCGA-21-1077-01	1	1	1	0
lusc_tcga	TCGA-21-1078-01	1	1	0	1
lusc_tcga	TCGA-21-1081-01	1	1	0	0
lusc_tcga	TCGA-22-0944-01	1	1	1	0
lusc_tcga	TCGA-22-1002-01	1	0	0	1
lusc_tcga	TCGA-22-1011-01	1	0	1	0
lusc_tcga	TCGA-22-1012-01	1	0	1	0
lusc_tcga	TCGA-22-1016-01	1	0	1	1
lusc_tcga	TCGA-56-1622-01	1	1	1	0
lusc_tcga	TCGA-34-2596-01	1	1	1	1
lusc_tcga	TCGA-34-2600-01	1	1	1	0
lusc_tcga	TCGA-34-2608-01	1	0	1	0
lusc_tcga	TCGA-43-2578-01	0	0	0	0
lusc_tcga	TCGA-60-2698-01	1	1	1	1
lusc_tcga	TCGA-60-2707-01	1	1	1	0
lusc_tcga	TCGA-60-2708-01	1	0	1	0
lusc_tcga	TCGA-60-2710-01	1	1	1	0
lusc_tcga	TCGA-60-2711-01	1	1	1	0
lusc_tcga	TCGA-60-2712-01	1	1	1	0
lusc_tcga	TCGA-60-2713-01	1	0	1	0
lusc_tcga	TCGA-60-2715-01	0	0	0	0
lusc_tcga	TCGA-60-2719-01	1	1	1	0
lusc_tcga	TCGA-60-2720-01	1	0	1	0
lusc_tcga	TCGA-60-2721-01	1	1	1	0
lusc_tcga	TCGA-60-2722-01	1	1	1	0
lusc_tcga	TCGA-60-2723-01	1	1	1	0
lusc_tcga	TCGA-60-2724-01	1	1	1	0
lusc_tcga	TCGA-60-2726-01	1	1	0	1
lusc_tcga	TCGA-66-2755-01	1	1	1	0
lusc_tcga	TCGA-66-2756-01	1	0	1	0
lusc_tcga	TCGA-66-2757-01	1	0	1	0
lusc_tcga	TCGA-66-2758-01	1	1	1	0
lusc_tcga	TCGA-66-2759-01	1	1	1	0
lusc_tcga	TCGA-66-2763-01	1	0	1	1
lusc_tcga	TCGA-66-2765-01	1	0	1	1
lusc_tcga	TCGA-66-2766-01	1	1	1	0
lusc_tcga	TCGA-66-2767-01	1	0	1	1
lusc_tcga	TCGA-66-2768-01	1	0	1	1
lusc_tcga	TCGA-66-2770-01	1	1	1	0
lusc_tcga	TCGA-66-2778-01	0	0	0	0
lusc_tcga	TCGA-66-2780-01	1	1	0	0
lusc_tcga	TCGA-66-2781-01	1	1	0	0
lusc_tcga	TCGA-66-2782-01	1	1	1	0
lusc_tcga	TCGA-66-2785-01	1	1	0	0
lusc_tcga	TCGA-66-2786-01	1	0	1	0
lusc_tcga	TCGA-18-3406-01	1	0	1	0
lusc_tcga	TCGA-18-3407-01	1	1	1	0
lusc_tcga	TCGA-18-3408-01	1	1	1	0
lusc_tcga	TCGA-18-3409-01	1	0	1	0
lusc_tcga	TCGA-18-3410-01	1	1	1	0
lusc_tcga	TCGA-18-3411-01	1	1	1	1
lusc_tcga	TCGA-18-3412-01	0	0	0	0
lusc_tcga	TCGA-18-3414-01	1	1	1	1
lusc_tcga	TCGA-18-3415-01	1	1	1	0
lusc_tcga	TCGA-18-3416-01	1	1	1	1
lusc_tcga	TCGA-18-3419-01	1	0	1	0
lusc_tcga	TCGA-18-3421-01	1	0	1	0
lusc_tcga	TCGA-37-3789-01	1	1	1	1
lusc_tcga	TCGA-43-3394-01	1	1	1	1
lusc_tcga	TCGA-43-3920-01	1	0	1	0
lusc_tcga	TCGA-46-3765-01	1	1	0	1
lusc_tcga	TCGA-46-3766-01	1	1	0	0
lusc_tcga	TCGA-46-3767-01	1	1	1	0
lusc_tcga	TCGA-46-3768-01	1	1	1	0
lusc_tcga	TCGA-46-3769-01	1	0	1	0
lusc_tcga	TCGA-66-2727-01	1	1	1	1
lusc_tcga	TCGA-66-2734-01	1	0	1	0
lusc_tcga	TCGA-66-2742-01	1	1	1	0
lusc_tcga	TCGA-66-2744-01	1	0	1	1
lusc_tcga	TCGA-66-2754-01	1	0	1	0
lusc_tcga	TCGA-66-2771-01	0	0	0	0
lusc_tcga	TCGA-66-2787-01	1	1	1	0
lusc_tcga	TCGA-66-2788-01	1	0	1	0
lusc_tcga	TCGA-66-2789-01	1	1	0	0
lusc_tcga	TCGA-66-2791-01	1	1	1	0
lusc_tcga	TCGA-66-2792-01	1	1	1	0
lusc_tcga	TCGA-66-2795-01	1	1	1	0
lusc_tcga	TCGA-18-4083-01	1	1	1	1
lusc_tcga	TCGA-18-4086-01	1	1	1	0
lusc_tcga	TCGA-37-4133-01	1	1	1	1
lusc_tcga	TCGA-37-4135-01	1	0	1	1
lusc_tcga	TCGA-37-4141-01	1	0	1	0
lusc_tcga	TCGA-51-4079-01	1	1	1	0
lusc_tcga	TCGA-51-4080-01	1	1	1	0
lusc_tcga	TCGA-51-4081-01	1	1	1	0
lusc_tcga	TCGA-22-4591-01	0	0	0	0
lusc_tcga	TCGA-22-4595-01	1	1	1	0
lusc_tcga	TCGA-22-4604-01	1	1	1	0
lusc_tcga	TCGA-22-4607-01	1	0	1	0
lusc_tcga	TCGA-33-4532-01	1	1	1	1
lusc_tcga	TCGA-33-4533-01	1	1	1	0
lusc_tcga	TCGA-33-4538-01	1	1	1	1
lusc_tcga	TCGA-33-4547-01	1	1	1	0
lusc_tcga	TCGA-37-3783-01	1	1	1	0
lusc_tcga	TCGA-60-2725-01	0	0	0	0
lusc_tcga	TCGA-66-2773-01	1	1	0	1
lusc_tcga	TCGA-66-2777-01	1	1	1	0
lusc_tcga	TCGA-66-2783-01	1	1	1	0
lusc_tcga	TCGA-66-2793-01	1	0	1	0
lusc_tcga	TCGA-66-2794-01	1	1	1	0
lusc_tcga	TCGA-66-2800-01	1	1	1	0
lusc_tcga	TCGA-18-3417-01	1	1	1	0
lusc_tcga	TCGA-18-4721-01	1	1	0	0
lusc_tcga	TCGA-22-4599-01	1	0	1	1
lusc_tcga	TCGA-22-4601-01	1	1	1	0
lusc_tcga	TCGA-22-4613-01	1	1	1	0
lusc_tcga	TCGA-33-4566-01	1	0	1	0
lusc_tcga	TCGA-33-4582-01	1	1	1	0
lusc_tcga	TCGA-33-4583-01	1	1	1	0
lusc_tcga	TCGA-33-4586-01	1	0	1	0
lusc_tcga	TCGA-34-5240-01	1	1	1	0
lusc_tcga	TCGA-34-5241-01	0	0	0	0
lusc_tcga	TCGA-39-5016-01	1	1	1	0
lusc_tcga	TCGA-39-5021-01	1	1	1	0
lusc_tcga	TCGA-39-5028-01	1	0	1	0
lusc_tcga	TCGA-39-5029-01	1	0	1	0
lusc_tcga	TCGA-39-5030-01	1	0	0	1
lusc_tcga	TCGA-39-5031-01	1	1	1	1
lusc_tcga	TCGA-39-5035-01	1	0	1	0
lusc_tcga	TCGA-39-5036-01	1	1	1	1
lusc_tcga	TCGA-39-5037-01	1	1	1	0
lusc_tcga	TCGA-39-5039-01	0	0	0	0
lusc_tcga	TCGA-63-5128-01	1	0	1	0
lusc_tcga	TCGA-63-5131-01	1	1	1	0

## Sheet: STAD
Mutations of PIK3CA, ARID1A, and TP53 in STAD samples from TCGA.
studyID	sampleId	Altered	PIK3CA	ARID1A	TP53
stad_tcga	TCGA-BR-6452-01	1	1	1	0
stad_tcga	TCGA-BR-6453-01	0	0	0	0
stad_tcga	TCGA-BR-6454-01	1	1	0	0
stad_tcga	TCGA-BR-6455-01	1	1	1	0
stad_tcga	TCGA-BR-6456-01	1	0	1	1
stad_tcga	TCGA-BR-6457-01	1	0	0	1
stad_tcga	TCGA-BR-6458-01	1	0	0	1
stad_tcga	TCGA-BR-6565-01	1	0	0	1
stad_tcga	TCGA-BR-6566-01	0	0	0	0
stad_tcga	TCGA-CG-4437-01	1	1	0	0
stad_tcga	TCGA-CG-4441-01	1	0	1	0
stad_tcga	TCGA-CG-5716-01	0	0	0	0
stad_tcga	TCGA-D7-6518-01	1	0	0	1
stad_tcga	TCGA-D7-6519-01	1	1	0	0
stad_tcga	TCGA-D7-6520-01	1	0	0	1
stad_tcga	TCGA-D7-6521-01	1	0	1	1
stad_tcga	TCGA-D7-6522-01	0	0	0	0
stad_tcga	TCGA-D7-6524-01	1	0	1	0
stad_tcga	TCGA-D7-6525-01	1	0	0	1
stad_tcga	TCGA-D7-6526-01	1	0	0	1
stad_tcga	TCGA-D7-6527-01	1	0	0	1
stad_tcga	TCGA-D7-6528-01	1	0	0	1
stad_tcga	TCGA-F1-6177-01	1	1	1	0
stad_tcga	TCGA-BR-6564-01	0	0	0	0
stad_tcga	TCGA-BR-6705-01	0	0	0	0
stad_tcga	TCGA-BR-6706-01	1	1	0	0
stad_tcga	TCGA-BR-6707-01	1	1	1	0
stad_tcga	TCGA-BR-6709-01	0	0	0	0
stad_tcga	TCGA-BR-6710-01	0	0	0	0
stad_tcga	TCGA-BR-6801-01	1	0	0	1
stad_tcga	TCGA-BR-6802-01	1	1	1	0
stad_tcga	TCGA-BR-6803-01	1	0	0	1
stad_tcga	TCGA-BR-6852-01	1	1	1	1
stad_tcga	TCGA-D7-6815-01	1	1	0	1
stad_tcga	TCGA-D7-6817-01	1	0	0	1
stad_tcga	TCGA-D7-6818-01	1	0	0	1
stad_tcga	TCGA-D7-6820-01	1	0	0	1
stad_tcga	TCGA-D7-6822-01	1	0	0	1
stad_tcga	TCGA-F1-6874-01	1	0	1	1
stad_tcga	TCGA-BR-6563-01	0	0	0	0
stad_tcga	TCGA-BR-7196-01	1	1	1	0
stad_tcga	TCGA-BR-7703-01	1	0	0	1
stad_tcga	TCGA-BR-7704-01	0	0	0	0
stad_tcga	TCGA-BR-7707-01	1	0	1	0
stad_tcga	TCGA-BR-7715-01	1	0	1	1
stad_tcga	TCGA-BR-7716-01	1	0	0	1
stad_tcga	TCGA-BR-7717-01	1	0	0	1
stad_tcga	TCGA-BR-7723-01	1	1	0	1
stad_tcga	TCGA-CD-5804-01	1	0	0	1
stad_tcga	TCGA-F1-6875-01	1	0	0	1
stad_tcga	TCGA-FP-7735-01	1	1	0	1
stad_tcga	TCGA-FP-7829-01	1	0	0	1
stad_tcga	TCGA-HF-7131-01	1	0	0	1
stad_tcga	TCGA-HF-7132-01	1	1	1	1
stad_tcga	TCGA-HF-7133-01	0	0	0	0
stad_tcga	TCGA-HF-7134-01	1	0	1	0
stad_tcga	TCGA-HF-7136-01	1	0	0	1
stad_tcga	TCGA-IN-7806-01	1	0	0	1
stad_tcga	TCGA-BR-7197-01	1	0	0	1
stad_tcga	TCGA-BR-7722-01	1	0	1	0
stad_tcga	TCGA-BR-7851-01	1	1	1	0
stad_tcga	TCGA-BR-7901-01	1	0	0	1
stad_tcga	TCGA-BR-7957-01	0	0	0	0
stad_tcga	TCGA-FP-7916-01	1	1	0	0
stad_tcga	TCGA-FP-7998-01	1	1	0	0
stad_tcga	TCGA-HJ-7597-01	1	0	1	1
stad_tcga	TCGA-IN-7808-01	1	0	0	1
stad_tcga	TCGA-IP-7968-01	1	0	0	1
stad_tcga	TCGA-BR-7958-01	1	1	1	0
stad_tcga	TCGA-BR-7959-01	0	0	0	0
stad_tcga	TCGA-BR-8058-01	0	0	0	0
stad_tcga	TCGA-BR-8059-01	1	1	1	0
stad_tcga	TCGA-BR-8060-01	1	0	0	1
stad_tcga	TCGA-BR-8077-01	1	0	0	1
stad_tcga	TCGA-BR-8078-01	1	0	1	0
stad_tcga	TCGA-BR-8080-01	1	0	0	1
stad_tcga	TCGA-BR-8081-01	1	1	0	1
stad_tcga	TCGA-BR-8284-01	1	1	1	0
stad_tcga	TCGA-BR-8285-01	0	0	0	0
stad_tcga	TCGA-BR-8286-01	1	0	0	1
stad_tcga	TCGA-BR-8289-01	1	1	0	1
stad_tcga	TCGA-BR-8291-01	0	0	0	0
stad_tcga	TCGA-BR-8295-01	0	0	0	0
stad_tcga	TCGA-BR-8296-01	1	0	0	1
stad_tcga	TCGA-BR-8297-01	1	0	0	1
stad_tcga	TCGA-BR-8360-01	1	1	0	1
stad_tcga	TCGA-BR-8361-01	1	0	1	1
stad_tcga	TCGA-BR-8363-01	1	0	1	0
stad_tcga	TCGA-BR-8364-01	0	0	0	0
stad_tcga	TCGA-BR-8365-01	1	0	1	0
stad_tcga	TCGA-BR-8366-01	1	1	0	0
stad_tcga	TCGA-BR-8367-01	0	0	0	0
stad_tcga	TCGA-BR-8368-01	1	0	1	0
stad_tcga	TCGA-BR-8369-01	1	0	0	1
stad_tcga	TCGA-BR-8370-01	0	0	0	0
stad_tcga	TCGA-BR-8371-01	0	0	0	0
stad_tcga	TCGA-BR-8372-01	1	0	1	0
stad_tcga	TCGA-BR-8373-01	1	0	0	1
stad_tcga	TCGA-BR-8380-01	0	0	0	0
stad_tcga	TCGA-CD-8524-01	1	0	0	1
stad_tcga	TCGA-CD-8525-01	1	0	0	1
stad_tcga	TCGA-CD-8526-01	1	1	0	1
stad_tcga	TCGA-CD-8527-01	0	0	0	0
stad_tcga	TCGA-CD-8528-01	1	0	0	1
stad_tcga	TCGA-CD-8529-01	0	0	0	0
stad_tcga	TCGA-CD-8530-01	1	0	0	1
stad_tcga	TCGA-CD-8531-01	1	0	0	1
stad_tcga	TCGA-CD-8532-01	0	0	0	0
stad_tcga	TCGA-CD-8533-01	1	0	0	1
stad_tcga	TCGA-CD-8534-01	0	0	0	0
stad_tcga	TCGA-CD-8535-01	0	0	0	0
stad_tcga	TCGA-CD-8536-01	1	1	1	0
stad_tcga	TCGA-D7-8570-01	0	0	0	0
stad_tcga	TCGA-D7-8572-01	0	0	0	0
stad_tcga	TCGA-D7-8573-01	0	0	0	0
stad_tcga	TCGA-D7-8574-01	0	0	0	0
stad_tcga	TCGA-D7-8575-01	0	0	0	0
stad_tcga	TCGA-D7-8576-01	1	0	0	1
stad_tcga	TCGA-D7-8578-01	1	0	0	1
stad_tcga	TCGA-D7-8579-01	1	0	1	0
stad_tcga	TCGA-EQ-8122-01	1	0	0	1
stad_tcga	TCGA-FP-8099-01	1	0	1	1
stad_tcga	TCGA-FP-8209-01	0	0	0	0
stad_tcga	TCGA-FP-8210-01	0	0	0	0
stad_tcga	TCGA-FP-8211-01	1	1	0	0
stad_tcga	TCGA-HU-8238-01	1	1	0	1
stad_tcga	TCGA-HU-8243-01	1	0	0	1
stad_tcga	TCGA-HU-8244-01	1	0	0	1
stad_tcga	TCGA-HU-8245-01	1	0	0	1
stad_tcga	TCGA-HU-8249-01	0	0	0	0
stad_tcga	TCGA-IN-8462-01	1	0	0	1
stad_tcga	TCGA-BR-8381-01	1	1	1	0
stad_tcga	TCGA-BR-8382-01	1	0	1	0
stad_tcga	TCGA-BR-8384-01	1	0	0	1
stad_tcga	TCGA-BR-8483-01	1	0	0	1
stad_tcga	TCGA-BR-8484-01	1	1	0	1
stad_tcga	TCGA-BR-8485-01	0	0	0	0
stad_tcga	TCGA-BR-8486-01	1	0	0	1
stad_tcga	TCGA-BR-8487-01	1	1	1	1
stad_tcga	TCGA-BR-8588-01	1	1	0	0
stad_tcga	TCGA-BR-8589-01	1	1	1	0
stad_tcga	TCGA-BR-8590-01	1	1	0	1
stad_tcga	TCGA-BR-8591-01	1	1	1	0
stad_tcga	TCGA-BR-8592-01	0	0	0	0
stad_tcga	TCGA-BR-8676-01	1	1	0	0
stad_tcga	TCGA-BR-8677-01	0	0	0	0
stad_tcga	TCGA-BR-8678-01	1	0	0	1
stad_tcga	TCGA-BR-8679-01	1	0	0	1
stad_tcga	TCGA-BR-8680-01	1	1	1	0
stad_tcga	TCGA-BR-8682-01	1	0	0	1
stad_tcga	TCGA-BR-8683-01	1	0	0	1
stad_tcga	TCGA-BR-8686-01	1	1	1	0
stad_tcga	TCGA-BR-8687-01	1	0	1	0
stad_tcga	TCGA-BR-8690-01	1	0	0	1
stad_tcga	TCGA-FP-8631-01	1	0	1	1
stad_tcga	TCGA-HU-8602-01	1	1	0	0
stad_tcga	TCGA-HU-8604-01	1	0	0	1
stad_tcga	TCGA-HU-8608-01	1	1	1	0
stad_tcga	TCGA-HU-8610-01	0	0	0	0
stad_tcga	TCGA-IN-8663-01	0	0	0	0
stad_tcga	TCGA-BR-A44T-01	0	0	0	0
stad_tcga	TCGA-BR-A44U-01	1	0	0	1
stad_tcga	TCGA-BR-A453-01	1	0	1	0
stad_tcga	TCGA-BR-A4CR-01	1	0	0	1
stad_tcga	TCGA-BR-A4CS-01	1	0	0	1
stad_tcga	TCGA-CD-A486-01	1	0	0	1
stad_tcga	TCGA-CD-A487-01	1	1	0	1
stad_tcga	TCGA-CD-A489-01	1	0	0	1
stad_tcga	TCGA-CD-A48A-01	1	0	0	1
stad_tcga	TCGA-CD-A48C-01	1	0	0	1
stad_tcga	TCGA-F1-A448-01	1	0	1	0
stad_tcga	TCGA-FP-A4BF-01	1	0	0	1
stad_tcga	TCGA-HU-A4G3-01	1	0	1	0
stad_tcga	TCGA-HU-A4G6-01	1	0	1	0
stad_tcga	TCGA-HU-A4G9-01	1	0	1	0
stad_tcga	TCGA-HU-A4GF-01	1	0	1	1
stad_tcga	TCGA-HU-A4GH-01	1	0	1	1
stad_tcga	TCGA-HU-A4GY-01	1	0	0	1
stad_tcga	TCGA-BR-A452-01	1	0	1	1
stad_tcga	TCGA-BR-A4CQ-01	1	0	0	1
stad_tcga	TCGA-BR-A4IU-01	1	0	0	1
stad_tcga	TCGA-BR-A4IV-01	0	0	0	0
stad_tcga	TCGA-BR-A4IY-01	1	0	0	1
stad_tcga	TCGA-BR-A4IZ-01	0	0	0	0
stad_tcga	TCGA-BR-A4J1-01	1	0	1	0
stad_tcga	TCGA-BR-A4J2-01	0	0	0	0
stad_tcga	TCGA-BR-A4J4-01	0	0	0	0
stad_tcga	TCGA-BR-A4J5-01	1	0	1	0
stad_tcga	TCGA-BR-A4J6-01	0	0	0	0
stad_tcga	TCGA-BR-A4J7-01	0	0	0	0
stad_tcga	TCGA-BR-A4J8-01	1	0	1	1
stad_tcga	TCGA-BR-A4PD-01	1	0	0	1
stad_tcga	TCGA-BR-A4PE-01	1	0	1	1
stad_tcga	TCGA-BR-A4PF-01	1	1	0	1
stad_tcga	TCGA-BR-A4QI-01	1	0	0	1
stad_tcga	TCGA-BR-A4QL-01	1	0	1	0
stad_tcga	TCGA-BR-A4QM-01	0	0	0	0
stad_tcga	TCGA-CD-A4MG-01	1	0	1	0
stad_tcga	TCGA-CD-A4MH-01	1	0	0	1
stad_tcga	TCGA-CD-A4MI-01	1	1	0	0
stad_tcga	TCGA-CD-A4MJ-01	0	0	0	0
stad_tcga	TCGA-D7-A4YT-01	1	0	1	0
stad_tcga	TCGA-D7-A4YU-01	1	0	1	0
stad_tcga	TCGA-D7-A4YV-01	1	1	1	0
stad_tcga	TCGA-D7-A4YX-01	1	1	1	0
stad_tcga	TCGA-D7-A4YY-01	1	0	1	1
stad_tcga	TCGA-D7-A4Z0-01	0	0	0	0
stad_tcga	TCGA-EQ-A4SO-01	0	0	0	0
stad_tcga	TCGA-HU-A4G2-01	1	1	0	0
stad_tcga	TCGA-HU-A4G8-01	1	0	1	0
stad_tcga	TCGA-HU-A4GC-01	1	0	0	1
stad_tcga	TCGA-HU-A4GD-01	1	0	0	1
stad_tcga	TCGA-HU-A4GJ-01	0	0	0	0
stad_tcga	TCGA-HU-A4GN-01	1	0	1	1
stad_tcga	TCGA-HU-A4GP-01	1	0	0	1
stad_tcga	TCGA-HU-A4GQ-01	1	1	1	1
stad_tcga	TCGA-HU-A4GT-01	0	0	0	0
stad_tcga	TCGA-HU-A4GU-01	1	1	1	1
stad_tcga	TCGA-HU-A4GX-01	1	1	1	1
stad_tcga	TCGA-HU-A4H0-01	1	1	0	0
stad_tcga	TCGA-HU-A4H2-01	1	0	0	1
stad_tcga	TCGA-HU-A4H3-01	1	1	1	1
stad_tcga	TCGA-HU-A4H4-01	1	1	1	1
stad_tcga	TCGA-HU-A4H5-01	0	0	0	0
stad_tcga	TCGA-HU-A4H6-01	0	0	0	0
stad_tcga	TCGA-HU-A4H8-01	1	0	1	0
stad_tcga	TCGA-HU-A4HB-01	0	0	0	0
stad_tcga	TCGA-HU-A4HD-01	1	0	0	1
stad_tcga	TCGA-B7-A5TI-01	1	1	1	1
stad_tcga	TCGA-B7-A5TJ-01	1	0	0	1
stad_tcga	TCGA-B7-A5TK-01	1	1	1	0
stad_tcga	TCGA-B7-A5TN-01	1	1	0	1
stad_tcga	TCGA-D7-A6EV-01	1	0	0	1
stad_tcga	TCGA-D7-A6EX-01	1	0	0	1
stad_tcga	TCGA-D7-A6EY-01	1	0	1	0
stad_tcga	TCGA-D7-A6EZ-01	1	1	1	0
stad_tcga	TCGA-D7-A6F0-01	1	1	0	1
stad_tcga	TCGA-D7-A6F2-01	1	0	0	1
stad_tcga	TCGA-HF-A5NB-01	1	1	1	0
stad_tcga	TCGA-MX-A5UG-01	0	0	0	0
stad_tcga	TCGA-MX-A5UJ-01	1	0	1	0
stad_tcga	TCGA-MX-A663-01	1	0	1	0
stad_tcga	TCGA-MX-A666-01	1	0	0	1
stad_tcga	TCGA-D7-A6ET-01	0	0	0	0
stad_tcga	TCGA-D7-A748-01	0	0	0	0
stad_tcga	TCGA-D7-A74A-01	0	0	0	0
stad_tcga	TCGA-IN-A6RI-01	1	0	0	1
stad_tcga	TCGA-IN-A6RL-01	1	0	0	1
stad_tcga	TCGA-IN-A6RR-01	1	1	0	1
stad_tcga	TCGA-KB-A6F7-01	1	0	1	0
stad_tcga	TCGA-RD-A7BS-01	1	1	0	0
stad_tcga	TCGA-RD-A7BW-01	0	0	0	0
stad_tcga	TCGA-RD-A7C1-01	1	0	1	0
stad_tcga	TCGA-D7-A747-01	1	1	0	0
stad_tcga	TCGA-D7-A74B-01	1	0	0	1
stad_tcga	TCGA-F1-A72C-01	1	0	0	1
stad_tcga	TCGA-IN-A6RJ-01	1	0	0	1
stad_tcga	TCGA-IN-A6RN-01	1	1	0	0
stad_tcga	TCGA-IN-A6RO-01	1	0	0	1
stad_tcga	TCGA-IN-A6RP-01	1	0	0	1
stad_tcga	TCGA-KB-A6F5-01	1	0	0	1
stad_tcga	TCGA-R5-A7O7-01	1	0	0	1
stad_tcga	TCGA-RD-A7BT-01	0	0	0	0
stad_tcga	TCGA-IN-A6RS-01	1	0	0	1
stad_tcga	TCGA-IN-A7NR-01	1	0	0	1
stad_tcga	TCGA-IN-A7NT-01	1	0	0	1
stad_tcga	TCGA-IN-A7NU-01	1	0	0	1
stad_tcga	TCGA-R5-A7ZE-01	1	0	0	1
stad_tcga	TCGA-R5-A7ZF-01	1	0	0	1
stad_tcga	TCGA-R5-A7ZI-01	1	0	1	0
stad_tcga	TCGA-R5-A7ZR-01	0	0	0	0
stad_tcga	TCGA-SW-A7EA-01	1	0	1	0
stad_tcga	TCGA-SW-A7EB-01	1	0	0	1
stad_tcga	TCGA-FP-A8CX-01	0	0	0	0
stad_tcga	TCGA-R5-A804-01	1	0	1	0
stad_tcga	TCGA-R5-A805-01	0	0	0	0
stad_tcga	TCGA-RD-A8MV-01	0	0	0	0
stad_tcga	TCGA-RD-A8MW-01	1	0	0	1
stad_tcga	TCGA-RD-A8N0-01	0	0	0	0
stad_tcga	TCGA-RD-A8N1-01	1	0	0	1
stad_tcga	TCGA-RD-A8N2-01	0	0	0	0
stad_tcga	TCGA-RD-A8N4-01	0	0	0	0
stad_tcga	TCGA-RD-A8N5-01	0	0	0	0
stad_tcga	TCGA-RD-A8N6-01	1	0	0	1
stad_tcga	TCGA-VQ-A8DL-01	1	0	0	1
stad_tcga	TCGA-VQ-A8DT-01	1	0	0	1
stad_tcga	TCGA-VQ-A8DU-01	1	0	0	1
stad_tcga	TCGA-VQ-A8DV-01	1	0	0	1
stad_tcga	TCGA-VQ-A8DZ-01	1	0	0	1
stad_tcga	TCGA-VQ-A8E2-01	1	0	0	1
stad_tcga	TCGA-VQ-A8P2-01	1	1	1	1
stad_tcga	TCGA-VQ-A8P3-01	0	0	0	0
stad_tcga	TCGA-ZA-A8F6-01	0	0	0	0
stad_tcga	TCGA-FP-A9TM-01	1	0	0	1
stad_tcga	TCGA-IN-AB1X-01	0	0	0	0
stad_tcga	TCGA-KB-A93G-01	1	0	0	1
stad_tcga	TCGA-KB-A93J-01	1	0	0	1
stad_tcga	TCGA-RD-A8N9-01	1	0	0	1
stad_tcga	TCGA-IN-AB1V-01	0	0	0	0
stad_tcga	TCGA-VQ-A8E7-01	1	0	0	1
stad_tcga	TCGA-VQ-A8PE-01	1	0	0	1
stad_tcga	TCGA-VQ-A8PK-01	1	1	1	1
stad_tcga	TCGA-VQ-A8PM-01	1	0	0	1
stad_tcga	TCGA-VQ-A8PQ-01	0	0	0	0
stad_tcga	TCGA-VQ-A91Q-01	1	1	0	0
stad_tcga	TCGA-VQ-A91U-01	1	0	0	1
stad_tcga	TCGA-VQ-A91V-01	1	0	0	1
stad_tcga	TCGA-VQ-A92D-01	0	0	0	0
stad_tcga	TCGA-VQ-A94T-01	0	0	0	0
stad_tcga	TCGA-VQ-AA64-01	1	0	1	0
stad_tcga	TCGA-VQ-AA68-01	1	0	0	1
stad_tcga	TCGA-VQ-AA69-01	1	1	0	0
stad_tcga	TCGA-VQ-AA6A-01	1	0	0	1
stad_tcga	TCGA-VQ-AA6B-01	1	0	0	1
stad_tcga	TCGA-VQ-AA6F-01	0	0	0	0
stad_tcga	TCGA-VQ-AA6G-01	1	0	0	1
stad_tcga	TCGA-VQ-AA6I-01	1	0	0	1
stad_tcga	TCGA-VQ-AA6J-01	1	0	1	0
stad_tcga	TCGA-VQ-AA6K-01	1	1	0	0
stad_tcga	TCGA-BR-4183-01	1	0	0	1
stad_tcga	TCGA-BR-4184-01	1	0	1	1
stad_tcga	TCGA-BR-4187-01	0	0	0	0
stad_tcga	TCGA-BR-4188-01	1	0	1	0
stad_tcga	TCGA-BR-4191-01	0	0	0	0
stad_tcga	TCGA-BR-4201-01	1	0	1	0
stad_tcga	TCGA-BR-4253-01	1	1	1	0
stad_tcga	TCGA-BR-4255-01	1	0	1	1
stad_tcga	TCGA-BR-4256-01	1	0	1	1
stad_tcga	TCGA-BR-4257-01	0	0	0	0
stad_tcga	TCGA-BR-4267-01	0	0	0	0
stad_tcga	TCGA-BR-4279-01	0	0	0	0
stad_tcga	TCGA-BR-4280-01	0	0	0	0
stad_tcga	TCGA-BR-4292-01	1	0	1	1
stad_tcga	TCGA-BR-4294-01	0	0	0	0
stad_tcga	TCGA-BR-4357-01	1	0	1	1
stad_tcga	TCGA-BR-4361-01	1	1	1	1
stad_tcga	TCGA-BR-4362-01	1	0	1	0
stad_tcga	TCGA-BR-4363-01	1	0	1	1
stad_tcga	TCGA-BR-4366-01	1	0	0	1
stad_tcga	TCGA-BR-4368-01	1	0	1	0
stad_tcga	TCGA-BR-4369-01	0	0	0	0
stad_tcga	TCGA-BR-4370-01	1	0	1	0
stad_tcga	TCGA-BR-4371-01	1	1	0	0
stad_tcga	TCGA-CG-4300-01	1	0	0	1
stad_tcga	TCGA-CG-4301-01	1	1	0	0
stad_tcga	TCGA-CG-4304-01	0	0	0	0
stad_tcga	TCGA-CG-4305-01	1	1	1	0
stad_tcga	TCGA-CG-4306-01	1	0	1	0
stad_tcga	TCGA-CG-4436-01	1	0	0	1
stad_tcga	TCGA-CG-4438-01	1	0	0	1
stad_tcga	TCGA-CG-4440-01	1	0	0	1
stad_tcga	TCGA-CG-4442-01	1	1	0	0
stad_tcga	TCGA-CG-4443-01	0	0	0	0
stad_tcga	TCGA-CG-4444-01	1	0	0	1
stad_tcga	TCGA-CG-4449-01	1	0	0	1
stad_tcga	TCGA-CG-4455-01	0	0	0	0
stad_tcga	TCGA-CG-4460-01	1	0	1	1
stad_tcga	TCGA-CG-4462-01	0	0	0	0
stad_tcga	TCGA-CG-4465-01	1	0	1	0
stad_tcga	TCGA-CG-4466-01	1	0	0	1
stad_tcga	TCGA-CG-4469-01	1	0	1	1
stad_tcga	TCGA-CG-4474-01	1	1	0	0
stad_tcga	TCGA-CG-4475-01	0	0	0	0
stad_tcga	TCGA-CG-4476-01	0	0	0	0
stad_tcga	TCGA-CG-4477-01	1	0	0	1
stad_tcga	TCGA-B7-5816-01	1	1	1	0
stad_tcga	TCGA-B7-5818-01	1	1	1	1
stad_tcga	TCGA-CD-5798-01	0	0	0	0
stad_tcga	TCGA-CD-5799-01	1	0	1	1
stad_tcga	TCGA-CD-5800-01	1	1	0	1
stad_tcga	TCGA-CD-5801-01	1	1	0	0
stad_tcga	TCGA-CD-5802-01	0	0	0	0
stad_tcga	TCGA-CD-5803-01	1	0	1	0
stad_tcga	TCGA-CG-5717-01	0	0	0	0
stad_tcga	TCGA-CG-5718-01	1	0	0	1
stad_tcga	TCGA-CG-5719-01	0	0	0	0
stad_tcga	TCGA-CG-5720-01	0	0	0	0
stad_tcga	TCGA-CG-5721-01	1	1	1	1
stad_tcga	TCGA-CG-5722-01	1	1	0	0
stad_tcga	TCGA-CG-5723-01	1	0	0	1
stad_tcga	TCGA-CG-5724-01	0	0	0	0
stad_tcga	TCGA-CG-5725-01	0	0	0	0
stad_tcga	TCGA-CG-5726-01	1	0	1	0
stad_tcga	TCGA-CG-5727-01	1	0	0	1
stad_tcga	TCGA-CG-5728-01	1	1	1	0
stad_tcga	TCGA-CG-5730-01	1	0	0	1
stad_tcga	TCGA-CG-5732-01	1	0	0	1
stad_tcga	TCGA-CG-5733-01	1	1	1	0
stad_tcga	TCGA-CG-5734-01	0	0	0	0
stad_tcga	TCGA-D7-5577-01	1	1	1	0
stad_tcga	TCGA-D7-5578-01	1	1	0	1
stad_tcga	TCGA-D7-5579-01	1	0	0	1
stad_tcga	TCGA-EQ-5647-01	1	1	0	0
