# Supplementary material for: Integrative Analysis Reveals Comprehensive Altered Metabolic Genes Linking with Tumor Epigenetics Modification in Pan-Cancer
Source: Biomed Res Int. 2019 Nov 7;2019:6706354. doi: 10.1155/2019/6706354 (PMC6881592; doi:10.1155/2019/6706354)
Supplement: Supplementary Materials — Supplementary Table 1: the number of sample information and differential expression genes for 11 different cancer types and 5 GEO data projects. Supplementary Table 2: the differential expression gene list and its fold change in 11 cancer types compared with normal samples. Supplementary Table 3: the metabolic genes and the differential expression of metabolic genes. Supplementary Table 4: the function annotations of MDEGs. Supplementary Table 5: the critical different expression genes related to epigenetic modification in the specific types of cancer. Supplementary Table 6: the genes with different expression and methylation influenced by DNMT3B expression. Supplementary Table 7: gene ontology analysis of differential expression and methylation genes. Supplementary Table 8: the correlation between expression and methylation of specific genes. Supplementary Table 9: the oncogene/tumor suppressor mutation frequency and the sample size with mutation across cancer types. Supplementary Table 10: the differential expression MDEGs in mutated samples compared with non-mutated samples across cancer types. Supplementary Table 11: the pathway enrichment analysis in each mutation group. Supplementary Figure 1: relationships among metabolic pathways, cancer types, and oncogene/suppressor gene mutations. [file 6706354.f1.zip › 6706354.f1/Supplementary Table10.xlsx]

## Sheet: Table10-1
Table 10-1 MDEGs in 8 cancer types with driver gene mutations.(|FoldChange| > 1.5 and BH < 0.05 are the cutoff criteria.)
Gene_name	LIHC-TP53-fold	LIHC-TP53-BH	HNSC-PIK3CA-fold	HNSC-PIK3CA-BH	BRCA-MYC-fold	BRCA-MYC-BH	STAD-ARID1A-fold	STAD-ARID1A-BH	KIRC-KMT2C-fold	KIRC-KMT2C-BH	LUAD-TP53-fold	LUAD-TP53-BH	LIHC-ARID1A-fold	LIHC-ARID1A-BH	KIRC-ARID1A-fold	KIRC-ARID1A-BH	COAD-APC-fold	COAD-APC-BH	LIHC-MYC-fold	LIHC-MYC-BH	STAD-PIK3CA-fold	STAD-PIK3CA-BH	LUAD-KRAS-fold	LUAD-KRAS-BH	LUSC-PIK3CA-fold	LUSC-PIK3CA-BH	STAD-TP53-fold	STAD-TP53-BH	HNSC-TP53-fold	HNSC-TP53-BH	LUSC-TP53-fold	LUSC-TP53-BH	BRCA-TP53-fold	BRCA-TP53-BH	COAD-KRAS-fold	COAD-KRAS-BH	LUSC-KMT2D-fold	LUSC-KMT2D-BH	COAD-TP53-fold	COAD-TP53-BH	BRCA-PIK3CA-fold	BRCA-PIK3CA-BH	HNSC-KMT2D-fold	HNSC-KMT2D-BH	LUAD-KMT2C-fold	LUAD-KMT2C-BH	KIRC-APC-fold	KIRC-APC-BH
A2M	-1.61782	0.00305137
NAT1					-1.89818	0.000380431																											-2.86066	1.41796e-11							2.16145	8.9358e-10
NAT2	-1.57154	0.0360043					1.95467	0.0227629
AANAT
ABAT					-2.24483	4.19271e-11																											-2.66198	0							1.60407	2.57787e-08
ABCA1									1.5333	0.0106429
ACAA1
ACACA
ACACB					-1.56873	1.21696e-05													-1.7207	0.00210214	-1.50758	0.0302691							-1.64934	2.6112e-06			-1.85929	2.23089e-13
ACADL
ACADM
ACADS																																	-1.6723	1.34707e-13
ACADSB																																	-2.31862	0
ACADVL
ACAT1
ACAT2
ACHE			-1.81517	0.0438583
ACLY
ACO1
ACO2
ACOX1
ACP1
ACP2
ACP5																					1.57441	0.000254765
ACPP			1.55366	0.00102251
ACTB
ACY1
ACYP1	1.50272	1.11373e-05
ACYP2
ADA
ADCY1					-1.93876	0.00246769																											-2.18373	8.44708e-06
ADCY2																																	1.60235	0.000180617
ADCY3
ADCY5					-1.51191	0.0114556																											-1.67354	9.47694e-05
ADCY6																													-1.80368	1.12767e-12			-1.50237	0
ADCY7
ADCY8
ADCY9																																	-1.51424	4.71162e-13
PLIN2											1.6864	0.00803441									-1.56097	0.0116536											1.50751	3.7151e-10
ADH1A
ADH1B	-1.72071	0.00324834			-1.98125	0.00289748																			-2.13	0.0474754	-2.44325	0.00343226			-2.95977	0.0235059	-1.62657	0.00484543
ADH1C
ADH4	-1.8309	0.000792473
ADH5
ADH6	-1.65669	0.000166037					1.80471	0.0218397																															-1.63105	0.0125467
ADH7			2.09816	6.04888e-05																					3.50419	0.000558035
ADK
ADRA2A					-1.56	0.000122271																											-1.71238	1.07821e-08
ADSL
ADSS
ACAN
AGL																			-1.54208	0.0367533
AGT																																			-1.7478	0.0484736
AGXT																			-1.51792	0.027519
AHCY
AK1											-1.60034	0.00276931
AK2
AK4											1.58181	0.00719861
AKT1
ALAD
ALAS1
ALAS2
ALB
ABCD1																																	1.56153	1.35742e-15
ALDH1A1			3.2297	5.90692e-07																	1.90543	0.0406923
ALDH2
ALDH3A1			2.2163	0.000497704	4.26112	0.0364875							5.19268	0.0093047																									-1.64172	0.0238845
ALDH1B1
ALDH1A3
ALDH3B1																									-1.75266	0.0455459
ALDH3B2
ALDH9A1
ALDH3A2																									1.63487	0.0151015
ALDOA
ALDOB
ALDOC					1.55306	1.38687e-05					1.58872	0.00429263
AKR1B1	1.6407	0.0495014
ALOX12
ALOX5
ALOX12B
ALOX15			3.66899	0.00376769
ALOX15B											-1.74227	0.0446327																					1.85235	0.0486854
AMD1																																	1.72417	0
AMPD1
AMPD2
AMPD3
AMT
AMY1A
AMY1B
AMY1C
AMY2A
AMY2B
ANPEP																																	-1.89011	0.0253946
SLC25A4
SLC25A5
SLC25A6
AOC2											1.57699	0.0269574
AOX1
NUDT2
APOA1
APOA2
APOB
APOC2
APOC3
APOE																					1.63328	0.00694499
APRT																			1.53745	4.47064e-06
ARF1
ARF3
ARG1
ARG2
ARNTL
ARSA
ARSB
STS							1.503	0.00618191									-1.76687	0.0225131
ARSE											-1.68733	0.00886974																	1.52539	0.0361684
ARSF
ASAH1					-1.8963	4.01512e-09																											-1.99949	2.57526e-15
ASL
ASMT
ASNS	1.96586	0.00040932			1.51917	2.93072e-09																											1.73823	0
ASPA
ASS1					1.51272	9.70109e-07																							-1.50352	0.000144668			1.97768	0
ATIC
ATP5A1
ALDH7A1
ATP5B
ATP5G1
AUH
BAAT
BCAT1	3.49542	0.00107418																											1.912	0.00251681			1.67758	4.39334e-06
BCAT2
BCKDHA
BCKDHB
BCS1L
BDH1																									1.54837	0.00772681
BGN																													1.79669	0.00136411
BHMT
BLVRA
BLVRB
BMP1
POLR3D
BPGM
ZFP36L1
BSG
BST1
CA1
CA2
CA3																																	2.50447	0.00685541
CA4																									-2.73449	0.0455983	5.70395	0.00851995
CA5A
CA6
CA7
CA8							1.67365	0.0192981			-2.21225	0.0258824																											-1.99173	0.0177552
CA9					1.82901	0.0150685																											3.68019	3.90271e-10
CA12					-1.62866	1.00277e-06																							1.51899	3.71079e-06			-2.31635	0
CACNA1A
CACNB2					-3.13926	0.017534															-2.15047	0.0150975											-2.32019	0.0127192							-2.27906	0.028502
CACNB3
SLC25A20
CAD
CALM1
CALM2
CALM3
CALR
CANX
CAT
CAV1			-1.53122	0.00226104																									1.70995	8.90107e-05
CBR1											-2.48026	0.0485872													2.71912	0.000207709
CBR3	1.70858	0.00650292																							2.3792	0.0108449							1.5126	7.33466e-10
CBS
CCBL1
CCNC
CCT6A											1.69299	0.0462458
CD36					-1.60706	0.0111572																					-1.67355	0.0291853
SCARB1
CD38																					2.03552	0.0214533											2.17222	1.52297e-13
ENTPD1
ENTPD2	1.66492	0.0126984
ENTPD6
ENTPD3					-1.7981	0.000311671																			1.78077	0.0258362
ENTPD5					-2.23459	0.00038032																											-2.63034	1.12704e-07
CD44	1.56707	0.0485494
CDA																													1.58091	0.000770302
CDK8
CDO1																											-1.9597	0.0084443					-1.50636	0.000441881
CDS1
CDX2																											1.5906	0.0198623
CEL
CES1			2.29439	0.040882																					3.14111	0.00886749
CETP
CGA
CGB
CHAT
AKR1C4																			1.69834	0.00190935							1.99026	0.0397592
CHIT1			2.06674	0.0393277
CHKA
CHKB
CHRM3			1.59515	0.00149859	2.17633	0.000121705																							1.80974	0.00048902			3.01279	1.30839e-09							-2.54197	0.000742112
CKB
TBCB
CKM											4.51847	0.00176238
CKMT1B					1.54127	4.77512e-05																																			-1.60879	7.6474e-05
CKMT2																											-1.98476	0.0443494
CLNS1A
CLPS
COMT
COX10
COX15
CP					1.87031	0.000865008																							-2.43845	0.015097			3.04651	4.0093e-12
CPOX
CPS1
CPT1A
CPT1B
CPT2
CRAT																																							-1.52102	0.0257023
CREBBP
CS
MAPK14
CSNK1G2
VCAN
NCAN					11.7647	0.000267557																											12.9232	0.000899527
CSPG4																													1.80606	0.000224761
SLC25A10
CTGF
CTH											1.78389	0.0489334
CTNNB1
CTPS1																																	1.63728	0
CYC1																			1.52969	4.54587e-06
DAD1
DGKA
DGKB
DGKG			2.01754	6.59904e-06																					2.42212	0.00755893			1.91966	0.00128271
DGKQ
DAO																			-1.59727	0.0447231
DBH
DBT
ECI1
DCK
DCN	-1.75027	0.0289777																			-1.58404	0.0464451							1.64172	0.00221346
DCTD
DCT
DDC																																	4.97333	0.000630238
AKR1C1	1.60966	0.000370341	1.83	0.0410596	1.60924	0.0188074													1.72173	0.00297107					3.05415	0.00161239			2.00476	0.0426698			1.59257	0.00864844
AKR1C2			1.72339	0.0244513																					2.23914	0.00907621			1.8714	0.0232579			2.51228	0.000782049
DDOST	1.51858	9.72679e-11
DDX6
DECR1
TIMM8A
DGUOK
DHCR7																													1.66671	0.00409007			1.57017	4.25577e-11
DHCR24
DHFR																													-2.12827	0
DHODH
DHPS
NQO1	1.89352	0.00445411																	2.46414	0.000814135					1.86284	0.0387949
DIO1									5.63851	0.00931822																							-1.94499	0.00043895
DIO2
DIO3
DLAT
DLD
DLST
SARDH																																	-1.54689	4.96496e-09
DNMT1	1.65636	5.81636e-06
TRDMT1
DNMT3A
DNMT3B	1.80974	0.000142794			1.58359	4.79864e-10																					1.75317	0.0122247					1.92941	0
DPAGT1
DPP4																					-1.73696	0.0395996					1.9688	0.000183974	1.60682	0.0388775
DPYD
DPYS
DTYMK	1.68686	1.58125e-10
DUT
TYMP							1.66839	0.000150058													1.83177	5.71517e-06
ECHS1
EEF1A1
EEF1B2
EEF1D																			1.54598	5.65627e-07
EEF1G
EEF2
EHHADH																									1.62109	0.000736772
EIF1AX
EIF2S1
EIF2B1
EIF2S3
EIF4A1
EIF4A2
EIF4B
EIF4E
EIF4EBP1	1.80393	8.87884e-07									1.95286	0.0282903																					1.72268	3.15874e-10
EIF4G1																									1.58662	0.000337755
EIF5
EIF5A
ELAVL1
ENO1	2.09191	1.94125e-13																															1.71171	0
ENO2																																							-1.55412	0.0175041
ENO3
EP300
EPHX1			1.54129	0.000648295
EPHX2					-1.69807	3.80203e-11																							-2.28241	4.1066e-13			-1.82429	0
EPRS
ESRRA
ETF1
EXT1
EXT2
F2
F7					-1.96437	0.000128587																					3.92578	0.00478717					-2.14777	5.92731e-08							1.60893	0.000185041
F9	-1.55851	0.00515594
F10							-2.92348	0.0415278																									-1.51954	1.68106e-08
FABP4					-1.75978	0.0119933																											-1.88208	0.000401619
FABP1
FABP6	3.81558	0.0210482																															2.49144	7.06153e-06
ACSL1
ACSL3
ACSL4
FAH
FASN
FAU
FBP1																																	-2.03526	0
FDFT1
FDPS
FECH																									1.55155	0.00275724													-1.52391	6.55367e-05
GPC4					-1.6074	1.09542e-05																																			1.51319	4.37254e-07
GPC5
FH
FHIT																																	-1.64563	1.56279e-12
FHL2																									-1.603	0.00975769
FMO1																											-1.62424	0.023375	-1.55543	0.0107026
FMO2																																	1.5202	0.00410661
FMO3																													-3.4222	0.0049893			3.53285	0.0037197
FMO4
FMO5					-1.96411	1.05132e-05															-1.61513	0.0286141											-2.53391	2.79356e-13
FMOD					-1.68968	0.00071206																											-1.8146	1.6591e-06
FPGS
FXN
MTOR
FSHB
FTH1
FUT8					-1.58676	3.09622e-10																											-1.76425	0
KDSR
G6PC	-1.64822	0.00971446
G6PD	3.33248	2.23318e-09																	1.9201	0.0345291													1.54581	1.2054e-11
SLC37A4
GAA
GAD1																													-1.85747	0.000733508			-3.99367	0.00408802
GAD2
GALC																			-1.82617	0.017104
GALE
GALK1
GALK2
GALNT1
GALNT2
GALNT3
GALT
GAMT																																	-2.11953	0
GANC
GAPDH
GART
GATA4
GATM																													-1.67586	1.23349e-05
GBA
GBE1
GC
GCDH
GCG
GCGR
GCK
GCKR
GCNT1	2.77343	0.0110969
GFER
GFPT1
GGCX
GGT1																			1.70895	0.0205721													1.7297	1.60998e-05
B4GALT1
GGT7																											1.69248	1.90977e-05
GGT5	-1.52936	0.040982
GIP
GK
GK2
GLA																																	-1.56613	0.000469294
GPC3			2.85329	0.00323132
GLB1
GCLC			1.67976	0.000709366																					2.58891	0.000111867
GCLM			1.54267	0.0156975																					2.26248	0.00263216
GLDC					1.65847	0.017436													-1.58977	0.02655																					-1.82745	0.0183647
GLO1
GLP1R																																	2.13424	0.000134802
GLS
GLRX
GLUD1
GLUD2
GLUL					-1.65886	3.65179e-12																											-1.81209	0
GM2A
GMDS
GMPR
GNA11
GNA15
GNAI1
GNAI2
GNAO1																																									-2.01704	0.000884994
GNAQ
GNAS
GNB1
GNB2
GNB3
GNG3
GNG4																											5.0433	0.0125489													-5.38892	2.30928e-05
GNG5
GNG7							-1.53153	0.0442979																			-1.68768	0.00144278
GNG10
GNG11																									-1.64873	0.0242908
GNGT1							-2.49651	0.0306469																					1.77903	1.50265e-05
GNGT2
GNS
GOT1
GOT2
GPC1
GPD1					-2.14276	0.000852664																			-1.88292	0.0410921							-1.84857	0.000363488
GPD2	1.54998	7.42174e-05
GPI
FFAR1
GPT																																							-1.6111	0.0389952
GPX1
GPX2			2.01773	2.5346e-05	2.82048	0.0232888							2.22993	0.00264596					1.97454	0.000206895					2.4005	0.00108512			1.76957	0.00703974
GPX3																									-1.58597	0.0132677
GPX4
GPX5
GPX7
GRP					-1.55198	0.00066259																							2.2987	0.00390712			-1.79763	2.90354e-08							1.51474	2.84131e-05
PDIA3
GSR																									2.23932	6.56009e-05
GSS
GSTA1			2.86673	0.0191122	2.71874	0.0274995																											7.02261	5.86698e-06
GSTA2																											2.80778	0.0346936
GSTA3
GSTA4							-1.63436	0.00145584																	1.70073	0.0072111
GSTM1
GSTM2			1.80467	0.0130233																					3.91755	0.000615315			1.79304	0.0350353			-2.23985	0
GSTM3	1.52328	0.0113991	1.74355	0.0192391							1.92195	0.00379725													2.79184	0.00613284							-2.33964	1.48058e-12
GSTM4																									2.35365	0.00235363
GSTM5																											-1.6826	0.00833113
GSTP1																																	1.73965	1.51408e-13
GSTT1
GSTT2
GSTZ1
GUCY1A2
GUCY1A3																											-1.56875	0.0064355
GUCY1B3
GUCY2C									1.63351	0.0161489																	1.948	0.0122783
GUCY2F
GUK1
GUSB
GYG1
GYS1
GYS2
GUCY2D
HSD17B10
HAGH
HADHA
HADHB
HADH
HAL
HAS1
HAS2
HAS3
HCCS
HDC																											-1.54767	0.00965761
HEXA
HEXB
HGD
HIF1A
HK1
HK2
HK3	1.80567	0.0027689																			1.53337	0.00725068											1.8261	1.21623e-11
HMBS
HMGCL
HMGCR
HMGCS1
HMGCS2																			-1.59289	0.0188807													-2.68674	0.00565009
HMMR	2.00317	1.50564e-08									1.79059	0.000123759																					1.55434	0
HMOX1
HMOX2
HNMT																															-1.53343	0.0388365	-1.57067	0
HNRNPD
HPD	-1.8866	0.00381451													3.89768	0.0178277																	5.44589	0.0135239
HPRT1
HSD3B1	3.69879	0.0098642
HSD3B2
HSD11B1	-1.71065	0.0287209
HSD17B1
HSD17B3																			1.57478	0.02655
HSD17B4																																	-1.52676	0
HSPA1B																					1.81519	0.00149092
HSPA8
HSPA9
HSPB1
HSPD1
HSPG2
NDST1
HYAL1
IDH1
IDH2
IDH3A
IDH3B
IDH3G
IDI1
IDS																																	-1.52355	5.66574e-07
IDUA																																	-1.68117	0
IMPA1
IMPA2					1.72501	2.26168e-09																											2.27413	0
IMPDH1	1.95014	6.84443e-05
IMPDH2
IDO1					2.40335	0.00213271	6.09186	1.4893e-05													4.44256	0.000394227					-3.35143	0.0279909	-3.13675	2.48587e-09			2.6045	0.000271779
INHA
INHBA																													1.81509	0.000176384
INHBB											1.52182	0.0372428																	2.30555	6.14489e-06
INHBC																			-1.67327	0.0417566
INPP1																													-1.60285	6.11524e-09
INS
INPP4A
INPP5A
INPP5B
INPPL1
EIF3E																			1.78413	1.25344e-09
ISL1							-1.61565	0.0309917																					-4.99633	4.7078e-10
STT3A
ITPA	1.51265	3.47338e-09
ITPK1
ITPKA																													-1.50797	0.00248278			-1.5475	0.000561783
ITPKB
ITPR2
ITPR3
IVD																																	-1.63195	0
KCNB1
KCNC2					-2.46562	0.0486457																											-4.19979	0.000294418
KCNJ11					-1.70945	3.31695e-10																							-1.51571	0.0179236			-2.22334	0
KCNS3
KHK																													-1.59386	1.20004e-05
KIFC3
TNPO1
LALBA
RPSA
LBR																																	1.69851	0
LCAT
LCT
LDHA
LDHB																					1.53697	0.0329976											2.37089	0							-1.80108	2.87053e-05
LDHC
LDLR
LEP					-2.22987	0.0203558																											-2.36491	0.00137976
LHB
LIPC
LIPE					-1.97439	3.04064e-05																							-2.19875	0			-1.72194	1.32627e-05
FADS1					1.52927	6.17946e-06
LMAN1
LPA
LPL					-1.53436	0.0180556					-2.01874	0.0176442
LRP2					-2.8637	0.000430465																											-3.19382	7.81961e-07
LSS
LTA4H
LTC4S
LUM																													2.01884	0.000463885
MARCKS	1.7023	4.4362e-06
MAGOH
MAN1A1
MAN2A1
MAOA					-1.78582	0.000583284																											-2.12194	4.57581e-08
MAOB							-1.97931	0.0186056																									-1.68449	0.00317546					-2.3952	0.0215268
MARS
MAT1A
MAT2A
CHST6					1.61209	0.000405977																							-1.83552	0.00575473			1.93477	1.01054e-08
MDH1
MDH2
ME1	1.92148	3.91742e-06																							2.30301	0.00158262							1.66365	2.09095e-07
ME2
MGAT1
MGAT2																			-1.60651	0.0151007
MGAT3					1.73054	0.000513725																							-5.3907	1.23037e-08			2.01595	3.16399e-07							-1.67035	0.00685605
MGAT5
MGST1
MGST2
MGST3
MIF
ALDH6A1																			-1.5401	0.02655													-1.5965	0
MOCS1
MOCS2
MPI
MPST
MTAP
MTHFD1
MTHFR
MTM1
MTTP									3.32211	0.0410206																													5.75908	0.0348354
MTR
MTX1
MUC2																																	-11.509	0.0168657
MUC4			2.05206	0.0176041																									-2.68048	4.55098e-05
MUC5AC
MUC6
MUC7
MUT
MVD
MVK
NAGLU
NCBP1
RPL10A
NEU1
NEU2
NFYA
NFYB
NME1
NME2
NME3																																	-1.56417	1.54043e-14
NME4
NNMT			-1.51809	0.0130455							-1.69809	0.00095056													-1.68076	0.0041039
NOS1																													1.95829	0.00314092
NOS2							2.4699	0.0163713																					-7.13363	6.39293e-05
NOS3
CNOT2
CNOT3
CNOT4
PNP
NPAS2															1.51292	0.0368662
NPR1
NPR2																													1.61392	0.0227144
NRF1
NT5E
NUP88
OAT
OAZ1
OAZ2
OCRL
ODC1											-2.46405	0.0486333													1.88691	0.0140703			1.70508	0.00594813			1.76533	0
OMD					-1.79881	1.02056e-05																					-1.79476	0.015288					-1.77749	4.22734e-08							1.59749	1.61519e-06
OGDH
OGN	-2.87843	0.00976342																			-3.03333	0.0437327					-2.60355	0.00390387					-2.43676	0.00166549							1.83672	0.0145709
OSBP
OTC
OXCT1											1.6496	0.000542004
P4HA1
P4HB
FURIN
PAFAH1B1
PAFAH1B2
PAFAH1B3	2.15417	0.00110263
PAFAH2
PAH
PARN
PAX6																													-1.85246	9.88327e-05
PC																													1.59618	5.29439e-05
PCBD1
PCCA
PCCB
PCK1	-1.50796	0.0224718			-2.44202	0.0063546
PCK2
PCSK1
PCYT1A																									1.68165	1.75433e-05
PDE1A																																	-1.52606	1.43249e-10
PDE1C																											-1.62269	0.0299926
PDE2A	-1.62667	4.1367e-05																							-1.66797	0.0455983							-1.70924	2.21043e-11
PDE3A																											-1.54511	0.0375621
PDE3B															2.57603	0.0284525					-1.51509	0.0274255
PDE4A					-1.57362	1.19779e-07																											-1.56088	7.60581e-11
PDE4B
PDE4C											-1.72846	0.0351776
PDE4D											-2.2456	1.96076e-05															-1.70655	2.53589e-05
PDE6A
PDE6C
PDE6D
PDE6G
PDE6H
PDE7A																																	1.69829	0
PDE8A
PDE9A			1.65432	0.00138168	1.50364	0.000721127																											2.01541	2.7904e-12
PDE1B
PDE6B					-1.50847	2.68609e-07																							-3.72216	5.20234e-07			-1.93819	0
PDHA1
PDHA2
PDHB
PDK1																																	1.68546	0
PDK2
PDK3	1.68797	3.73601e-07
PDK4					-1.72431	0.000904726																											-1.92386	7.85366e-07
ENPP1
ENPP2
ENPP3																																	2.10684	0.00373033
PFAS
PFDN1
PFDN2
PFDN4	1.5295	1.14944e-07																																					1.51047	0.000878899
PFDN5
PFKFB1
PFKFB2							1.55209	0.000258387
PFKFB3
PFKFB4	2.37869	1.1563e-06									1.80075	0.000454218
PFKL
PFKM
PFKP																																	2.08736	0
PGAM1
PGAM2
PGD	1.97091	1.47897e-11	1.52449	0.00057054																					2.04536	0.00126679
PGK1
PGK2
PGM1
PGM3
ABCB1																																	-1.60325	4.80197e-08
ABCB4											-1.85194	0.0387381
PHKA1
PHKA2
PHKB
PHKG1
PHKG2
PHYH
PIGA
PIGC
PIGF
PIGH
PIK3C2A
PIK3C2B
PIK3C2G							2.03973	0.000634923													1.70477	0.0279922					-1.89134	0.00539969
PIK3C3
PIK3CA			1.62191	0																					1.97412	7.14724e-06
PIK3CB
PIK3CD
PIK3CG
PIK3R1																			-1.62245	0.00454197
PIK3R2
PI4KA
PI4KB
PIP4K2A
PKLR																											3.73221	0.036539
PLA2G1B																															-3.04923	0.0351144
PLA2G2A
PLA2G4A											-1.70306	0.0448826																					2.6707	7.68994e-06
PLA2G5
PLAUR
PLCB2
PLCB3
PLCB4
PLCD1
PLCG1
PLCG2
PLD1			1.56588	6.66578e-13																					2.0025	5.24598e-05							1.62597	5.67197e-13
PLD2
PLIN1	-1.9452	0.00351051			-2.16337	0.00056526																											-1.91262	0.000132105
PLTP									1.96718	0.0329663					2.22039	0.0340782													1.5811	1.10119e-07
PMM1
PMM2
EXOSC9
PNLIP
PNLIPRP1
PNLIPRP2
PNMT																											4.05569	0.0111354					6.28774	0.0153644
POLA1	1.5812	9.84405e-06																											-1.50194	1.88135e-09
POLD1	1.65681	9.42184e-09																			1.62457	0.000298383
POLD2
POLE																													-1.50077	1.23699e-11
POLE2	1.60507	4.08217e-05									1.57719	0.00337132
POLR2A
POLR2B
POLR2C
POLR2D
POLR2E
POLR2F
POLR2G
POLR2H																									1.82205	4.6107e-07
POLR2I
POLR2J
POLR2K					1.51328	0
POLR2L
POMC			2.14034	0.0312821	1.90833	0.0129876																											1.73863	0.0192744
PPARA																																	1.51784	6.66301e-14
PPARG			1.58307	0.00892056
MED1																																	1.54716	0.000232377
PPAT
CTSA
PPOX
PPP1CA
PPP1CB
PPP1CC
PPP2CA
PPP2CB
PPP2R1A
PPP2R1B
PPP2R2A
PPP2R5D
PRELP	-1.77423	0.0204691																									-1.5719	0.0486925
PRIM1	1.59679	1.34256e-06									1.50704	0.00107772																	-1.587	1.62992e-12
PRIM2	1.55381	9.23569e-08									1.50126	4.42235e-05
PRKAA1
PRKAA2					-1.68128	0.000948764	-2.17344	0.0226679																									-1.846	1.27206e-06
PRKAB1
PRKAB2
PRKACA
PRKACB					-1.7764	0.0393257																											-2.28703	0.000281536
PRKACG
PRKAR1A
PRKAR1B
PRKAR2A
PRKAR2B																	-1.93142	0.0311596									-1.81307	0.00159398	-1.71789	0.00145915
PRKCA					1.73649	3.48654e-05
PRKCD
PRKD1
PRKCSH
MAPK11																																							-1.60146	0.0155548
PROC									4.24778	0.00357741																	2.10059	0.0142325	1.72807	0.00605162
PRODH									1.82813	0.0245849											2.28862	0.0253282							-1.56844	0.00208764
PROS1
PRPS1
PRPS2
LGMN
PSAP
PSMA1
PSMA2
PSMA3
PSMA4
PSMA5
PSMA6
PSMA7
PSMB1
PSMB2
PSMB3
PSMB4
PSMB5
PSMB6
PSMB7
PSMB8
PSMB9																																	1.54619	1.72577e-10
PSMB10							1.59192	2.99959e-06													1.68919	1.21795e-07
PSMC1
PSMC2
PSMC3
PSMC4
PSMC5
PSMC6
PSMD1
PSMD2																									1.81843	1.9445e-06
PSMD3
PSMD4
PSMD5
PSMD7
PSMD8
PSMD9
PSMD10
PSMD11																									1.51808	6.16011e-05
PSMD12
PSMD13
PSME1
PSME2							1.55777	2.5718e-07													1.52619	1.76851e-06
PSPH											1.83461	0.00138229																					1.59629	2.62085e-06
PTEN
PTGDS																											-2.04917	0.00332368	-2.2793	1.31264e-06
PTGIS
PTGS1	1.5904	0.019617																											1.62516	0.000344983
PTGS2
PYCR1	2.01984	0.000122885
ALDH18A1
PCYT2
PYGB
PYGL
PYGM																											-1.96494	0.0434939
QDPR																																	-2.28863	4.67593e-11
RANBP2
RAP1A
RAP1B
RBP2																																	1.73631	0.00264204
RDH5	-1.65713	0.00125963			-1.5694	0.000917475
RENBP																											1.51839	0.0124211
RORA
RPE
RPE65
RPL3
RPL3L
RPL4
RPL5
RPL6
RPL7																			1.66548	1.02386e-05
RPL7A
RPL8																			2.09165	1.61518e-07
RPL9
RPL10
RPL11
RPL12
RPL13																			1.59278	0.000472056
RPL15
RPL17
RPL18
RPL18A																			1.5343	0.0039589
RPL19
RPL21
RPL22
RPL23A
RPL24
RPL26
RPL27
RPL30																			1.65504	1.62842e-08
RPL27A
RPL28
RPL29
RPL31
RPL32
RPL34
RPL35A
RPL37
RPL37A
RPL38
RPL39
RPL41
RPL36A
RPLP0
RPLP1
RPLP2
RPN1
RPN2
RPS2
RPS3
RPS3A
RPS4X
RPS4Y1	1.52818	0.0072934																	1.59943	0.0431139
RPS5
RPS6
RPS7
RPS8
RPS9
RPS10
RPS11
RPS12
RPS13
RPS14
RPS15
RPS15A
RPS16
RPS17
RPS18
RPS19
RPS20
RPS21
RPS23
RPS24
RPS25
RPS26
RPS27
RPS27A
RPS28
RPS29
RRM1
RRM2	1.97452	2.43642e-08					1.53531	4.04445e-06			1.59342	0.00090841									1.50483	3.59473e-05											1.61286	1.21803e-13
RXRA
ACSM3																																	1.58577	0.00293982
SAT1
MSMO1
SC5D											1.54996	0.00712615
SCP2
SDC1
SDC2																													1.57336	0.0142194
SDC4
SDHA
SDHB
SDHC
SDHD
SEC13
SGSH
FBXW4
SHMT1
SHMT2
SI
ST6GAL1
ST3GAL1
ST3GAL2
ST3GAL3
SLC2A1	2.5006	0.000415269									1.66143	0.0237369
SLC2A2
SLC2A3
SLC2A4
SLC2A5											1.71697	0.0064812																					1.72186	4.25326e-11
SLC5A1
SLC5A5
SLC6A8			1.60889	9.02618e-07
SLC9A1
SLC10A1
SLC10A2
SLC16A1											2.42081	0.0125544																					1.74838	4.86999e-13
SLC19A1
SLC25A1
SLCO1A2
SLC22A1
SLC22A3							-1.6988	0.00828238			-1.73382	0.00182881									-1.7383	0.0123664					1.64241	0.00128067	1.64352	0.00279969
SLC22A2
SMARCD3
SMN1
SMN2
SMPD1
SMPD2
SMS	1.55195	5.96111e-08
SNAP25																																									-7.20225	0.00180704
SNRPB	1.54576	3.03398e-08
SNRPD1
SNRPD2	1.76996	0.0171161
SNRPD3
SNRPE
SNRPF
SNRPG
SORD
UAP1
SQLE					2.02139	0																											1.52073	6.41747e-11					1.54807	0.00104804
SRD5A1											1.53321	0.00135103																					2.23727	0
SRD5A2	-1.85075	0.0201127
AKR1D1
SREBF1							1.6316	1.15939e-07																									-1.53152	3.69016e-10
SREBF2
SRM	1.73947	3.11207e-12
SRP9
SRP14
SRP19
SRP54
SRP68
SRP72
SRPR
SSR1
SSR2
SSR3
SSR4
STAR																													-2.28518	0.000341344
SULT1E1																					2.3692	0.040837							-2.39282	0.0312168
ELOVL4											2.03325	0.0255																					2.22593	5.72902e-09							-1.62809	0.0111409
STK11
SULT1A2
STX1A	1.79412	0.00360961																									1.66335	0.0293105
STXBP1
SULT1A1																																	-1.65834	0
SULT1A3
SULT2B1
SUOX																																	-1.55867	0
SULT2A1
ABCC8					-2.06293	4.44976e-05																											-3.09396	1.28609e-13
MED22
VAMP2																																	-1.64772	0
SYT5																																									-1.99648	0.0369369
TALDO1	1.50604	5.4684e-07																							1.57499	0.00667887
TAT	-1.51724	0.0325908			-5.65001	0.0196303																											-5.35975	0.00180305
TAZ
TBCA
TBCC
TBCD
TBCE
TBL1X			1.56019	9.97496e-07																					1.72115	0.000793353
TBXAS1
MLX
TCP1
TDO2																																	1.87899	7.89987e-06
TEAD1
TEAD4
TEAD3
TH
TK1	1.92406	1.0305e-08									1.64117	0.000170822									1.6509	5.14892e-07
TK2
TKT	1.84628	2.69164e-08																	1.66522	0.000973276					1.54024	0.00822973
TM7SF2
TP53																					1.52981	2.34236e-06							-1.61999	3.15913e-09
TPH1																																	-6.85357	0.0184804
TPI1
TPMT
TPO																																	-1.72238	3.44419e-13
TPR
CCT3
TSHB
TST
TSTA3																			1.6051	1.26832e-06
TUBA4A																																	1.64154	2.84445e-11
TUBA3C	4.10605	0.00937524
TUBB2A
TXN																									1.89366	0.000391468
TXNRD1	1.75375	4.07773e-05	1.5918	0.00397009																					2.14842	0.00257485
TYMS	1.51151	0.00125419					1.60782	6.67004e-07			1.66688	0.000667974									1.59326	1.95064e-06							-1.64008	1.2573e-08			1.57715	9.42352e-13
TYR
TYRP1
UBA52
UGCG																																	-2.39394	0
UGDH	1.71704	3.99721e-07																							1.71138	0.00252032
UGP2
UGT2B4
UGT2B7																																	6.91823	3.50162e-05
UGT2B10
UGT2B15					-2.47806	0.0101737																											-1.92619	0.0106113					-1.90111	0.0439123
UGT2B17																																	-3.09861	0.0162019
UGT8			2.07121	4.31547e-05	2.86078	2.36512e-09																			1.72132	0.0139378							4.94769	0							-2.11436	0.00266973
UCK2
UMPS
UPP1	1.5863	2.70242e-05
UROD
UROS
VBP1
VDAC1
WARS							2.71475	5.72771e-05													3.61806	2.05949e-08					-2.0491	0.0148334					1.68896	7.46159e-14
EIF4H
XDH			-1.53746	0.00823447
XPO1
YWHAB
YWHAZ					1.52723	0
ZFP36																																	-1.65572	1.05647e-07
MOGS
TUBA1A																									-1.55015	0.023027
ALDH5A1
PLA2G7																					1.52274	0.00653808											1.87724	4.59564e-14
TUSC3
NUP214
CUBN
SLC25A16
PDHX
AAAS
ANP32A
ST8SIA2																													1.91513	0.0142135
NCOA3
PNPLA4																																	-1.63343	0
USP11
TKTL1
ACOX2																																	-1.81413	5.58008e-06
ACOX3
NME5					-1.83444	3.1288e-09																			-1.89155	0.0438197							-3.01675	0
PIP5K1A
PIP5K1B
PIP4K2B
PLA2G6
PLA2G10											-3.45151	0.000104836																					-1.96374	8.93087e-09
SLC25A11
BBOX1																																	2.28195	9.73535e-08							-1.74349	0.0113722
GNPAT
TEAD2	1.52577	0.00376468
RAE1
GEMIN2	1.53222	4.0392e-08									1.54691	0.00423335
PIK3R3																													-1.9497	4.24722e-13
NDST2
LIPF
DGKZ
DGKE
DGKD
DDO					-1.52608	9.78145e-07																											-1.76005	0
CHST1
AGPS
DEGS1
KMO	-1.70465	0.00097336
PDXK																																	1.58199	0
KHSRP
SLC25A12
PLA2G4C
RDH16
PPAP2A
PPAP2C
PPAP2B																													-1.52554	7.88993e-06
PDE8B
AOC3					-1.59191	2.18164e-05																					-1.6231	0.0350605					-1.62329	3.54309e-08
AKR1C3	1.69608	7.24657e-09	1.84959	0.0205373																					2.74912	0.00383622
ABCB11
NCOA1
PDE5A																											-1.50266	0.00247455					-1.98645	5.14075e-07
ALDH4A1
EIF3A
EIF3B	1.50417	7.90115e-10
EIF3C
EIF3D
EIF3F
EIF3G
EIF3H																			1.66289	3.07091e-09
EIF3I
EIF3J
JMJD7-PLA2G4B																																	-1.58214	3.35875e-11
HYAL2
DGAT1
B4GALT4			1.71417	0.00128392																					1.77658	0.00388159
B4GALT3
B4GALT2
ABCC3
GPAA1																			1.56408	7.62519e-07
TNFSF13									1.55526	0.010166																							-1.50513	0
CDS2
MTMR1
FBP2
FPGT
PEX11A																																	-1.52745	6.4883e-11
SUCLG2
SUCLG1
SUCLA2
DPM1
DPM2
INPP4B					-1.53369	4.29205e-06																											-2.13354	0
CES2
IQGAP1
GMPS																									1.55414	5.26769e-05
HDAC3
ALDH1A2																																	-1.52862	0.0145124
PROZ
SYNJ1
SYNJ2
SPHK1	2.19082	0.0014174
SGPL1
SLC5A6																																	1.75043	0
EIF2B4
EIF2B3
EIF2B2
EIF2B5																									1.57678	0.0159248
EIF2S2
MTMR3
MTMR2
GYG2
KYNU																			1.52162	0.0434973													2.39109	1.74034e-09
MGAM																																	-4.1873	0.000151976
P4HA2
CH25H							-1.65	0.0248953
RPL14
NFS1
PAPSS2
PAPSS1
PIGQ																																	-1.50279	0
MTMR6
MTMR7									1.64752	0.0252672
MTMR4																			-1.5316	0.00410083
SLC16A4											-2.08023	0.00142901																					-1.62522	1.3214e-10
SLC16A3	1.93145	0.00434405
RQCD1
DGKI
VAPB
VAPA
LRAT																																	1.5077	0.00298165
GCNT3																											1.52741	0.0122266
DHRS3																													-1.55194	1.73203e-06
MAPKAPK2
MED14
B4GALT6																													-1.55952	0.00019049
B4GALT5
CNOT8
NDST3
RPL23
GRHPR
LIPG							1.51173	0.0102262											-1.78037	0.0208919
HS6ST1
MED21
FADS2			1.70508	0.00011378	1.6757	3.47752e-05																							-1.57422	0.000575459			1.75683	2.68811e-07
ABCG2							-1.94644	0.00404936													-1.87568	0.0146075					1.51655	0.0184947					-1.51836	0.00100526
CHST2					1.69269	3.51934e-06																											1.99039	2.41124e-12
MED23
MED17
MED26
MED27
MED7
GSTO1
GGPS1
PCYT1B			1.79751	0.0088952																					2.16499	0.0100035			2.21123	0.00337814
CHST3																																	1.51024	9.12933e-08
MED20
PIGL
PIGB
PGS1
PSMF1
AKAP5					-1.90469	7.63951e-07			1.72755	0.0336391																							-1.60284	2.31219e-06
PMPCB
GAL3ST1
SPTLC2
TECR
POLR1C
PTGES	1.77513	0.0341602	-1.53265	0.00431931
MINPP1
NR1D1
CLOCK
ENTPD4
PRDX6
NCOR1
NCOR2
GDA			2.15048	0.00102251																					2.99078	0.0164515
ABCG1																																	-1.507	2.57526e-15
GNA14	-1.59057	0.00661226			-1.56996	0.000873645																											-1.64308	5.02889e-06
NUP155											1.88227	1.52609e-05
SEC24C
HS2ST1											1.50118	0.00497357
LPIN2
EIF5B
SDC3
NUP93	1.59177	3.65121e-06
EDEM1
MLEC
EIF4A3
SPCS2
PTDSS1					1.54662	0
TOMM20
NUPL1
LCMT2
PSMD6
MED24
TOMM70A
SEC24D
POM121
SMG7
FIG4
LPGAT1
RBM8A
GFPT2
HS3ST4																													-6.3592	2.18202e-08
HS3ST3B1
HS3ST3A1
HS3ST2
HS3ST1																					1.57263	0.00556376							-1.54853	0.000154637
SLC23A2
SLC23A1																											1.69122	0.0282345
MED12
NUP153
SCO2
MED6
NR2E3
ACOT8
GNPDA1	1.54703	2.30256e-06
GNE																													-1.69838	8.64859e-06
MED16
PIGK
ABCC5			2.44295	0																					2.78883	3.58019e-06
COX17
MUC12
SNUPN
GPC6
COL4A3BP
UST																									1.53984	0.0159248			1.52814	0.000412925
PREB
NAMPT
AASS					-1.64946	9.2895e-11													-2.4056	0.0443838													-1.65523	0
LPCAT3
SLC25A13
SLC25A15																			-1.86102	0.0420502
DHRS9
ALG3																									1.82774	6.36267e-07
NME6
PSMD14
GPHN
TIMM17B
AKR1A1
B3GNT3					1.64346	0.000724109																											2.46649	1.59938e-13
WARS2
TUBA1B	1.72218	1.78368e-07
BPNT1
TUBB3																									-1.8487	0.016056			1.55513	2.55088e-05			1.73204	2.73198e-06
TUBB4A					2.07863	0.00730662					2.59348	0.0139454													2.50913	0.0326189			2.19678	0.0367943			1.87523	0.0120992
TUBB4B
CEPT1
PEMT
ST3GAL6																																	1.64099	1.18341e-11
RAPGEF3					-1.73159	1.15935e-10																			-1.52277	0.0327646							-2.23181	0
YAP1
PRMT5
CDIPT
SEC24B
LYPLA1
TIMM17A
ACAA2
TOMM40	1.56269	0.00119667
ECI2
TIMM44
PFDN6
SLC25A17
SEC23A
NCOA2
NOP56	1.57148	2.90116e-06
AGPAT1
AGPAT2
SPTLC1
SLC19A2																																	-1.81461	0
ARFGEF2
CCT7
CCT4
CCT2																					1.62307	0.000194439
TXNRD2
SLCO1B1
PAIP1
PAICS
ST6GALNAC2																																	-1.72777	2.3415e-12
POLR3F
POLR3G					1.51303	7.72998e-09																											1.56634	4.39784e-13
POLR3C
MTX2
PMVK
B3GNT2
GNB5
EBP
CCT8
POLD3
UGT2B11					-3.41508	0.0336373
NUP50
AHCYL1
MTHFD2																																	1.51829	0
NEU3
FTCD	-1.5133	0.000182898
PDE10A
HPSE							1.84071	9.01853e-06
ME3					-1.58115	2.24938e-07																											-1.57014	1.9203e-10
PPARGC1A	-1.51881	0.0202743			2.28056	0.000441461	-2.00109	0.0246403											-2.2265	0.0173336													2.62198	6.51986e-06
LYVE1
DHRS4
MAN1A2
RNPS1
UGT2A1	2.12768	0.0185007
SEC61B
SDS
SLC27A5	-1.52703	0.00257912
SLC27A2																																	-3.09808	0.000257627
GLIPR1																											-1.8264	0.00324624
RAPGEF4					-1.50255	9.10313e-06																											-1.62895	6.65459e-11
KERA
NUPL2
HIBADH
POLR3A
PLA2G16																											1.54221	0.00237463
LSM6
NUDT5
TREH	-1.93946	0.0191648
INMT	-2.04742	0.00231565																													-2.22304	0.0235059	-1.87817	4.71284e-11
DDX20
RPL35
GALNT6					-1.50346	2.06268e-06																							1.66387	1.13728e-06			-1.78055	0
GALNT5					-3.9708	3.7264e-05																											-3.11361	1.67181e-06							2.0252	0.000207772
CA5B
MAN1B1
MGAT4B
B4GALT7
LYPLA2
MGAT4A
FKBP9																													1.57125	6.74068e-10
EXOSC8
MGLL
CASC3
XRN2
DOLK
CHSY1
SEC31A
DIS3
ARSG																																	-2.28678	0
SACM1L
NCBP2
SEPHS2
SEPHS1
RPIA
CCT5	1.53557	2.32807e-07
NT5C2
EXOSC7
SMG1
NCOA6
NMNAT2																																									-1.98562	0.0145318
CDK19	1.5156	0.00108441
NUP205
GPD1L	1.64174	0.000212842																											-1.6476	3.44166e-08			-1.65776	0
LPIN1					1.523	3.63516e-07																											2.07805	0							-1.52228	6.02389e-06
GANAB
PSME4																																	1.50039	0
PMPCA
NUP210	1.53516	6.90884e-06	1.76163	1.71223e-05																					1.64434	0.0280943			-1.93551	4.02601e-08
PLCB1	1.85262	2.09961e-07					-1.55008	0.0124254													-1.61081	0.0139216							1.50144	0.000255451
SMG6
ACSL6	-1.80045	0.0490544
SIN3B
SMG5
AHCYL2							2.04865	1.4273e-08			-2.27124	1.20334e-05															-1.54397	0.00301124
MED13L																																	-1.59222	2.57526e-15
PIP5K1C
EXOSC2
MLYCD
SLC44A1
GCAT
TRAM1
ETHE1							1.51622	0.000821111
QPRT							-2.78825	0.00162625			1.6731	0.00133518															2.90584	2.22943e-06
SEC11A
SEC61G																													1.61443	0.0317327
HAAO							-1.66528	0.0159157																					-1.62163	7.91593e-05			1.87703	8.5954e-06
NUP188	1.50483	2.47885e-06
RPL13A
NNT
PIK3R5
SLC16A8																													-1.89152	0.00332118
PIGN
CHST5
AMACR
CA14					-1.50485	0.00822231																											-1.62392	0.000100482
NUP62
EDC4
PLD3
POLA2	1.68132	5.58715e-10
LSM5
PLA2G15
GSPT2
PITPNB
PISD
NAT6
PGLS
LSM4
SAMM50
MGAT4C
SUMF2
RPL36
POLR1A
MTHFD1L					1.50789	1.54661e-07																											2.11793	0
CNOT10
GEMIN5
WWTR1
SIN3A
DAK
UPF2
GLCE																																	-1.67866	0
HACL1																													-1.56881	0
LDLRAP1
FBXW2
FBXL3
PHGDH	1.9619	1.33363e-06	1.56578	0.000915856							2.06379	0.00314802																	-1.62552	6.84734e-05			2.96213	1.7113e-10
B3GAT3
TIAM2
FBXL5																																	-1.52827	0
KCNG2
FBXO6	1.6165	3.47338e-09					1.58729	3.19097e-06
FBXO4
HIBCH
PLA2G2D			2.17534	0.0315957																							-1.91003	0.0209572	-3.59598	3.40214e-06			1.54066	0.0315893
AK5					-3.17673	6.77746e-07																											-2.77156	3.27132e-09
GALNT8
GAPDHS
TIMM10B
TIMM13
TIMM10
TIMM9
TIMM8B
OPLAH
AP3M1
PABPC1					1.54825	0													1.72378	1.80476e-06													1.5077	0
TPK1							1.612	0.000135694	2.15013	0.00708031
ACAD8
ANKRD1			-2.32762	0.0391098	2.33243	0.045724																			-2.27805	0.0251776							2.29862	0.031507
B3GAT1
ST6GALNAC4											-1.66552	5.86606e-05
PDE7B																					-1.97456	0.0338987					-1.68405	0.0149614
INPP5J																																	-1.8823	4.76279e-11
CHIA
GLS2
GNMT	-1.71556	0.0327323
COQ2							1.55304	4.52978e-11
TNFRSF21																																	1.78842	1.35742e-15
LSM1
LSM3
DHDH	1.79033	0.0112362																									1.5669	0.00901038					1.59089	2.83503e-05
MOCS3
HPGDS					-1.51424	1.11872e-06																											-1.65033	1.39148e-12
EIF3K
MAT2B
SLCO1B3	-1.86693	0.0288101																									-2.69963	0.0102297	1.80263	0.00665028
DCPS
SPCS1
MCTS1
C1GALT1C1
MED4
PHPT1
GRHL1											1.65049	0.000202309
ALG5
CNOT7
PYCR2
NME7
GMPPB
GMPPA
SEC61A1
TIMM22
ALG6
DSE
DNMT3L
CERS2
DMGDH
PSAT1					2.58575	3.08419e-11	1.52512	0.00468475			1.84365	0.00100739									1.73161	0.000131545			2.01385	0.000113353							5.10613	0							-1.66345	0.0082528
PLA2G2E
NT5C
ZNRD1
PIK3R4
RRM2B
G0S2																									-1.89826	0.0468101
PLA2G3																					2.98096	0.00607313											-1.51063	0.0452647					-3.20078	0.00122617	1.7314	0.00569186
CHST11	1.6656	0.00176315																							-1.50216	0.0133787
GALNT9
GEMIN4
PNPLA8
RDH8
AK3
NSDHL
PDE11A	-1.83992	0.0160871
MED31
AMDHD2
EXOSC3
EXOSC1
PAM16
ST8SIA3
LAP3							1.68617	2.7323e-06													1.84406	2.8708e-08
TXNDC12
APIP
POLR1D
MLXIPL							-1.85441	0.0416935																			1.85104	0.00527545	3.29218	0.00120344			-1.50855	0.00308012
ABHD5
RDH11
RPL26L1
SAR1B
ANGPTL4
HSD17B12
AADAT																			-2.03154	0.0259406													2.54152	0
HAO2
PLCE1
ACP6																													-1.50427	6.48166e-06
PIGP
NT5C3A
PIPOX			1.75984	0.0445837
GMPR2
GCNT4																																	-2.78796	1.518e-09
CHST15
CSAD					-1.54642	2.97158e-06																											-1.88698	0
HEMK1																																	-1.53154	0
PRKAG2
LCMT1
ISYNA1																													-1.62608	0.000180301
HSD17B7
SCLY
AZIN1
MED15
PIGT
OAZ3
ACSL5
CMPK1
POLR3K
UPB1
INPP5K
GNG13																																	-1.99529	0.010326
PHAX
GALNT7					-1.55073	1.32917e-06																											-1.59751	1.58187e-10
NUDT9
PANK1
NUP54
POLE3
NANS							1.62199	0
GNG2
DPM3
HAO1
FBXW5
XRN1
CHPF2
UGT2B28
SMOX	1.58379	0.00346576																											1.59566	7.64699e-08			1.64096	4.24231e-12
EXOSC4																			1.95823	8.44292e-07
TOMM7
UGT1A10
UGT1A8
UGT1A7			3.19031	0.000716139																									2.66473	0.042918
UGT1A6	1.65985	0.000286783	1.76725	0.00530185																					2.16758	0.000710608
UGT1A5
UGT1A9
UGT1A4
UGT1A1
UGT1A3
CRLS1
CROT					-1.61991	1.31662e-08
PDP1
MED18
PIGG
RETSAT
ELOVL2					-1.51693	0.0407472																											-3.3672	1.66439e-10
LPCAT2	1.6426	0.0047032
UCKL1
PIGX			1.57609	5.64652e-10																					1.72916	5.12218e-06
ACSM5					-1.55872	1.80886e-05																											-1.5107	4.01337e-07
MOCOS
PDPR
MED9
PNPO
SEC61A2
SMG8
NADSYN1
TMLHE
ETNK2							-2.2624	0.0355017																			1.86881	0.0209572
PANK4
ADI1
PGM2
FBXW7
PI4K2B
RFK
AGPAT5
ACER3
CHDH																													-3.9936	5.10711e-10			-1.52337	3.46234e-13
PI4K2A
CSGALNACT2
ETNK1
CHST12
SMPD3							1.56492	0.00810132
GALNT10					-1.53224	4.46373e-11																											-1.56925	0
STAB2
NAGK
MIOX																											2.54008	0.0362613
MED29
SMPD4
PIGV
VAC14
POLR3B
FAR2
EDEM2
NUP133
CNDP2
AGK
OGDHL			1.72738	0.0469514																							2.66616	0.0131102	-1.62713	0.0421194
UGGT2
CSGALNACT1	-1.98951	0.0479086
METTL2B
DCP1A
ADCY10
ALLC
ACSS2
CMAS
GNG12
SMG9	1.59944	0.000300463
ALG1
GPCPD1
CCBL2
CTPS2
CHST7			2.10326	4.4994e-12																					1.84424	0.00211614
INPP5E
ASAH2
EIF5A2	1.76185	0.00183949																							1.60233	0.00607579
POLE4	1.50421	2.95317e-07
MUC13																													-4.42937	0.0119706
SPHK2
UGGT1
AGPAT3
AGPAT4	2.15348	1.54985e-05
BDH2
C1GALT1
EXOSC5
MCCC1			1.69739	4.76127e-12																					1.99754	0.00108512							1.65824	0
NT5M																													-1.72552	4.91401e-05
NIT2
TOMM22
CHPT1																													-2.08403	3.04826e-08
AKR1B10	1.65999	0.00466364	1.74403	0.00482581	2.21945	0.0209564																			2.09915	0.04179							2.58701	0.00214311
PNPLA2																																	-1.5345	0
NUP107	1.50271	3.51421e-07																			1.50444	0.00483823
MAN1C1
SLC44A2
DOLPP1
GALNT16							-1.80781	0.0358064																									-1.93718	3.28306e-12
CNOT6
PDP2
GPAM
GBA2
GBA3																	-2.93041	0.00469139
TRIB3	1.55438	0.000400516																									2.17534	4.06892e-06
POLD4
G6PC2
LSM2
MUC3B
SQRDL							1.58957	1.31554e-07
SRPRB
ENOPH1
PRUNE
PRODH2
GNB4
ELOVL5					-1.67567	7.70929e-08																											-1.90146	0
TRMT11
PPCDC
HPSE2
AASDHPPT
SPCS3
SRR
BCAN																																	1.91224	0.0159678
GALNT11
KIF13A
OXCT2
MCCC2																																	-1.80978	0
ABCG5
ABCG8
WBSCR17																													-3.39274	1.19823e-05
MTMR14
POLR1E
NDST4
PLA2G2F			-1.7722	0.0132275
HS3ST6
IPPK
CERK
NMNAT1
ELOVL1
GNPNAT1
LPIN3
AGXT2
UPF3B
UPF3A
NADK
PYCRL																			1.71835	3.07091e-09
AACS
VKORC1
GGCT
NUP37
ALG8
ELOVL6
WDR77
ALG12
MBOAT7
THTPA																																	-1.53194	0
B3GNT4
CHPF																													1.55018	3.13047e-06
CERS4							-2.44538	0.0152349																									-1.56348	4.9919e-15
ACSS3
GALNT14																																	1.52751	0.000204803
ARSJ																																			1.86255	0.0484736
SRD5A3
PANK3
MANEA
GALNT12																																	1.67998	0.000588824
PPCS
TBL1XR1			1.65573	0																					2.088	8.21836e-08
GEMIN7
ALG9
UGT2A3
AGMAT
GEMIN6
PIP4K2C
ALG13
PLBD1	3.32567	1.56342e-06
LPCAT1																													1.55225	5.94163e-08
NUP85
L2HGDH																			-1.50899	0.00611543
ELOVL7
PANK2
SEMA6D			1.81856	0.00426209	-2.51386	0.0135383																							1.63473	0.0457775			-1.8367	0.0228322
PGAP1
PTGES2
UXS1
EDC3
EDEM3
HSD3B7							1.50723	4.83341e-05
GRPEL1
FLAD1
PNPLA3					1.53816	0.0171428																							1.51314	0.00741421			2.01231	2.85352e-06					-2.34856	0.00493523
COASY
SLC19A3					-1.54957	0.0439661
SLC44A4					-1.79528	2.26751e-11																											-2.09679	0
STARD5	-1.53808	0.000233588
NPL
TUBB1
SLC25A32
PTDSS2
SGPP1
PLA2G12A																																	-1.50246	0
AMN											-2.05275	0.00351759													1.5774	0.0436631
MED25
HYI
SEH1L
ELOVL3					1.7223	0.000386787															1.71467	0.0455592							-1.8926	0.0134003			1.53465	0.00213224
DOHH
CHST9
UCK1
NUDT12																																	-2.07827	0
INHBE
LONP2
SLC25A2
B3GNT5	1.85001	0.00191799	1.51576	2.16999e-09	1.72827	8.43686e-07					1.54677	0.00246315													2.1361	0.000177595							3.08017	0
POLR1B
FAR1
MRI1
MED10
HAGHL
POLR3GL
ACSS1
TUBB6											1.51922	0.0146304
NT5C1A
PLA2G12B
DGAT2																																	1.74191	2.99264e-05
MCEE
GPT2	-1.58403	0.00165312			1.62068	1.21544e-11																											1.91507	0
PIGO
CNDP1	-3.11768	0.0133392
B3GNT9
TUBA1C	1.85433	1.67934e-07																															1.53659	0
AGPAT9																									2.78965	0.000615315
PLCD4	2.03476	0.000941766																															-1.8317	1.27081e-12
ADO
ALG10
ALG2
TNKS1BP1
EPT1																									1.64153	0.000142835
PNPT1
PLCZ1
SLC25A21
HS6ST2																									1.99626	0.00263216
MED30					1.67986	0																											1.55075	0
MCFD2
SEC11C
CERS5
ACY3											-1.59297	0.0490599									1.64149	0.0268082							-1.62757	4.72188e-06
IDI2
RFT1
LDHAL6B
G6PC3																																	-1.61175	0
TIMM50
MARS2
B3GNT7					1.66816	0.00329459																											2.16486	1.7727e-07
NT5C1B
PIGM
TPTE2
ACPT
CGB5
PIGS
MUC16					1.73332	0.0361896																							-2.25338	0.0124919			2.9442	5.90242e-07
FTMT
CGB8
GNG8																													-3.61427	0.0101959
TGS1
SAT2
MED8
PLCD3																																	-1.5265	3.06521e-10
CHST14
SLC46A1																																	-1.59279	0
TUBA3D					-3.71088	0.00619987																											-3.27299	0.000665468
WBSCR22
GALNT13					1.92457	0.0046614																											2.11912	0.000239244							-2.33238	0.00500074
ACSM1
APOA5	-1.53444	0.00364338
GALNT15					-1.59285	6.48009e-05																							1.72578	0.00320266			-1.56407	1.48979e-06
MUCL1																																	2.14058	0.00999728
EXOSC6
GSTO2
TPH2
AK7									1.55338	0.0231636																							-1.53931	2.49719e-05
PLD4					-1.78997	4.36006e-08																											-1.81519	1.65089e-12
ADSSL1									1.72493	0.0154303									-1.73652	0.0350891
DEGS2					-1.91652	6.98385e-10	1.50136	0.00332135																									-2.51291	0					-1.52879	0.0175382
PLA2G4E
ACSM2A
EARS2
CANT1
GGT6																													-1.53813	0.000162506
AFMID									1.59051	0.00357741
ACER1
CPT1C
B3GALT6
SLC44A3
PIGU	1.50611	2.82718e-10
NUP35
CMPK2
MBOAT2
NEU4
ACMSD					-2.24945	0.0251727																											-1.67395	0.0494082
SGPP2
GALM
DNAJC19			1.55624	0																					2.05839	9.21073e-06
CHCHD4
UROC1
METTL6
GLYCTK
GNPDA2
ENPP6
PPARGC1B																																	1.66085	0
GRPEL2
STARD4
ACOT12
B3GAT2
ADHFE1																									1.73995	0.0414798	-1.70956	0.00588908
AGPAT6
UPRT
GPR119
MUC17
NANP
PSMA8
MUC15	3.14217	0.00900294																															2.74543	3.68852e-10
AMDHD1																											1.72516	0.0353886					-1.70153	0.0020319
ALG10B
RDH12
B3GNTL1
PIK3R6
STARD6
HSCB
GPAT2	3.05386	0.00496764																											-4.98506	4.85092e-10
UPP2
PPM1L			1.77243	3.36477e-07
ARSK
MBOAT1
RDH10					1.98114	0.000201312																											3.69767	0
AWAT2
LDHAL6A
DGKH									1.52883	0.0252672
ADAL
NAGS																																	-2.46915	7.7605e-11
PHOSPHO1
CHST13																											2.7928	0.0365466
SGMS2
DCP2
GALNTL5
IDO2
POLR3H											-1.99894	0.0104856
B3GNT6																																			2.78574	0.0209668
DCP1B
PAOX
ADCY4																																	-1.6456	2.70892e-13
LDHD											-1.58592	0.0203797
FUK
ALG14
PIKFYVE
PLD6
CERS3
[truncated: 73 more rows]

## Sheet: Table10-2
Table 10-2 The Foldchange value and BH(adjust p-value) of metabolic genes that are in DNA methylation and histone acetylation in 8 cancers with driver gene mutations.
Gene_name	LIHC-TP53-fold	LIHC-TP53-BH	HNSC-PIK3CA-fold	HNSC-PIK3CA-BH	BRCA-MYC-fold	BRCA-MYC-BH	STAD-ARID1A-fold	STAD-ARID1A-BH	KIRC-KMT2C-fold	KIRC-KMT2C-BH	LUAD-TP53-fold	LUAD-TP53-BH	LIHC-ARID1A-fold	LIHC-ARID1A-BH	KIRC-ARID1A-fold	KIRC-ARID1A-BH	COAD-APC-fold	COAD-APC-BH	LIHC-MYC-fold	LIHC-MYC-BH	STAD-PIK3CA-fold	STAD-PIK3CA-BH	LUAD-KRAS-fold	LUAD-KRAS-BH	LUSC-PIK3CA-fold	LUSC-PIK3CA-BH	STAD-TP53-fold	STAD-TP53-BH	HNSC-TP53-fold	HNSC-TP53-BH	LUSC-TP53-fold	LUSC-TP53-BH	BRCA-TP53-fold	BRCA-TP53-BH	COAD-KRAS-fold	COAD-KRAS-BH	LUSC-KMT2D-fold	LUSC-KMT2D-BH	COAD-TP53-fold	COAD-TP53-BH	BRCA-PIK3CA-fold	BRCA-PIK3CA-BH	HNSC-KMT2D-fold	HNSC-KMT2D-BH	LUAD-KMT2C-fold	LUAD-KMT2C-BH	KIRC-APC-fold	KIRC-APC-BH
ACACA	1.26497	0.00556698	1.15807	0.0145727	-1.00082	0.991953	-1.09177	0.579684	1.42044	0.01827	1.16617	0.174107	1.11673	0.907341	1.21693	0.725466	-1.01261	0.969184	1.03899	0.812973	1.12181	0.441677	1.04831	0.905297	1.23968	0.113633	1.22521	0.0768859	1.0646	0.319911	1.12106	0.692024	-1.05765	0.331565	1.03309	0.873351	1.07954	0.999992	1.02693	0.855904	1.02545	0.748891	-1.05448	0.887166	1.05233	0.955453	1.05829	0.999365
ACLY	1.17392	0.0691166	1.1017	0.135973	1.01815	0.755157	-1.02069	0.889124	1.27241	0.0919354	1.30265	0.00938421	-1.02417	0.971573	1.05852	0.998148	-1.02675	0.9198	-1.04992	0.761636	-1.02105	0.887438	1.07536	0.843763	1.23987	0.0640958	1.21765	0.0312759	1.18897	0.00229081	1.1814	0.488887	-1.11859	0.00548351	1.00627	0.974313	-1.06874	0.999992	1.02995	0.782571	-1.06808	0.183889	-1.0402	0.927871	1.14667	0.931112	1.02891	0.999365
ACSS2	1.15417	0.230007	1.03448	0.785244	-1.09605	0.0864645	1.04634	0.750997	1.08716	0.56762	1.02318	0.904009	-1.02488	0.977624	-1.02975	0.998148	1.02197	0.945355	-1.03928	0.861706	-1.00401	0.981475	-1.16626	0.662124	-1.03898	0.825743	1.28375	0.0109072	-1.07315	0.419821	1.06151	0.846386	-1.03936	0.390351	1.00776	0.973702	-1.10216	0.999992	1.27508	0.00249043	-1.018	0.773624	1.10082	0.830156	1.13682	0.949686	-1.0006	0.999608
AHCY	1.09485	0.293575	-1.07896	0.556395	1.16116	0.00041099	1.11836	0.292074	-1.01007	0.956832	1.05739	0.693056	1.15632	0.885539	1.01592	0.998148	1.12792	0.708754	1.04776	0.746585	1.10785	0.359955	-1.16336	0.60867	1.02037	0.911252	1.08365	0.420309	-1.20472	0.0361847	1.26986	0.356027	1.17471	7.49785e-06	-1.06086	0.814612	-1.09389	0.999992	1.26056	0.0550683	-1.02287	0.67423	1.12991	0.797228	1.21479	0.739238	1.04885	0.999365
BHMT	-1.0358	0.884457							1.21025	0.473503	-19.6934	0.549238	1.0318	0.980599	-1.21966	0.968268			-1.65351	0.166971			19.9788	0.718503																					-3.46788	0.968381	1.0857	0.999365
CHDH	-1.05849	0.490285	1.04411	0.932497	-1.22443	0.00377438	1.15414	0.273748	1.0474	0.864629	-1.24726	0.190137	1.19684	0.818389	-1.03681	0.998148	1.03963	0.911913	1.00853	0.954752	1.02189	0.899277	1.19695	0.692888	-1.57255	0.155593	1.06077	0.654978	-3.9936	5.10711e-10	1.08864	0.911351	-1.52337	3.46234e-13	1.09369	0.64232	-1.38189	0.999992	1.17955	0.1042	-1.09192	0.209154	-1.26295	0.919474	-1.42588	0.739238	-1.06558	0.999365
DHFR	1.36059	0.000676357	1.27413	0.0333272	1.08344	0.174001	1.38605	7.73332e-05	1.25149	0.13413	1.23469	0.0469312	-1.02793	0.969545	1.13249	0.942137	-1.31347	0.140991	-1.41341	0.0435477	1.3362	0.00124204	-1.02539	0.955495	1.16726	0.362582	-1.05765	0.58	-2.12827	0	-1.01992	0.953715	1.01122	0.834265	1.01406	0.966436	1.02374	0.999992	1.052	0.785116	-1.04167	0.5361	-1.08779	0.912194	-1.04304	0.966987	1.01028	0.999365
DNMT1	1.65636	5.81636e-06	1.15344	0.0733647	1.14361	0.0091789	1.11697	0.457927	1.18822	0.178394	1.33344	0.00565935	-1.33872	0.884705	1.07051	0.998148	-1.10479	0.645979	-1.35441	0.155585	1.27551	0.076929	-1.07786	0.84571	1.06435	0.723367	1.05543	0.713913	-1.33801	2.50455e-06	1.25254	0.432774	1.27042	1.11138e-08	1.00569	0.982918	-1.04776	0.999992	-1.01552	0.922998	-1.08058	0.156203	1.03541	0.953429	1.06995	0.949774	1.07345	0.999365
DNMT3A	1.22564	0.0708168	1.14245	0.156148	1.16157	0.000599168	-1.22566	0.118884	1.23679	0.092714	1.28198	0.0437798	1.08462	0.938829	1.06264	0.998148	-1.05343	0.884452	-1.03168	0.885209	-1.01899	0.908659	1.03345	0.949925	1.05787	0.777811	1.11634	0.327613	-1.17759	0.0370289	1.29424	0.408678	1.24985	2.44583e-10	-1.08715	0.690723	1.00516	0.999992	-1.05014	0.730094	-1.0495	0.327386	1.00927	0.994734	1.13634	0.949686	1.10195	0.999365
DNMT3B	1.80974	0.000142794	-1.13248	0.340438	1.58359	4.79864e-10	-1.5251	0.167816	1.44798	0.0707404	2.70427	0.0952657	-1.44924	0.885539	1.34694	0.662423	-1.0031	0.994313	-1.03335	0.921785	1.0967	0.781748	-1.6118	0.822308	1.20649	0.746083	1.75317	0.0122247	1.32926	0.0067716	1.66246	0.64102	1.92941	0	-1.41504	0.117137	-1.43685	0.999992	1.29017	0.146716	-1.07898	0.444631	-1.0587	0.947124	-1.18781	0.979403	-1.01975	0.999365
FASN	1.30207	0.0407026	1.20621	0.0130455	-1.17095	0.182127	1.08967	0.616922	1.10712	0.594734	-1.41934	0.205126	1.03165	0.97403	1.10627	0.985223	1.04031	0.936858	-1.14604	0.5518	1.25139	0.13903	1.44708	0.540704	1.00818	0.980405	1.14162	0.338605	1.09505	0.253029	1.06254	0.898283	-1.12695	0.204274	1.11391	0.702622	-1.05941	0.999992	-1.13123	0.49661	1.09485	0.440206	-1.01517	0.989407	-1.14424	0.953361	1.01324	0.999365
HK2	1.69743	0.078379	1.20575	0.0570933	-1.00325	0.974097	1.17338	0.384103	1.31274	0.146268	1.2798	0.176658	1.67784	0.884705	1.05931	0.998148	-1.12448	0.631783	-1.6506	0.40759	1.26209	0.195617	1.06645	0.924223	1.06314	0.830891	-1.04213	0.831045	1.26006	0.0135198	1.27891	0.609009	-1.07811	0.277712	1.16856	0.351645	-1.12329	0.999992	-1.32346	0.00224044	-1.06317	0.490519	-1.03295	0.967362	-1.04803	0.980969	1.03849	0.999365
KAT2A	1.28549	0.00283949	1.0789	0.339312	1.13603	0.00872844	1.14113	0.194381	1.28263	0.128926	1.11927	0.330077	-1.27709	0.83948	1.27495	0.638573	1.04753	0.87283	1.091	0.536475	1.22104	0.0471604	1.06495	0.863032	1.31209	0.0193792	1.15239	0.099618	1.13649	0.0525077	1.2123	0.423771	-1.1517	0.000872375	-1.05813	0.728618	1.02222	0.999992	1.19909	0.0163914	-1.09922	0.0559701	1.0727	0.851024	1.02225	0.987184	1.19504	0.841529
MAT1A	-1.32464	0.00597429	-1.28672	0.560748	1.26486	0.368582	1.30461	0.738663	1.27986	0.832708	1.48133	0.380547	1.1229	0.909596	1.45628	0.998148	-1.10421	0.926606	-1.05171	0.776804	1.42305	0.65373	-1.85449	0.610518	-1.12905	0.815781	1.14928	0.85876	-1.29371	0.419637	1.27386	0.79425	-1.00932	0.969747	1.75351	0.217917	-2.1666	0.999992	1.1637	0.74519	-1.24893	0.446413	-1.0683	0.988548	1.4237	0.949686	-2.07197	0.999365
MAT2A	1.13718	0.16564	1.03776	0.647226	-1.05815	0.158647	1.14868	0.077222	1.19448	0.213152	-1.10245	0.23877	-1.06019	0.94409	1.12636	0.933057	-1.02737	0.919424	-1.22894	0.165434	1.05678	0.571617	1.07295	0.782542	1.1617	0.186846	-1.04561	0.590193	-1.27118	1.97029e-06	1.0968	0.697492	-1.20596	2.56111e-09	-1.0115	0.951392	1.20009	0.999992	-1.04628	0.660513	1.0527	0.177894	1.02374	0.963222	-1.01291	0.991934	1.14565	0.932842
MTHFD1	-1.37085	0.00484803	-1.00081	0.995747	1.08045	0.0433831	1.29902	0.00270489	1.13845	0.339329	1.22048	0.0289153	-1.1877	0.897477	1.0635	0.998148	-1.09485	0.642433	-1.36316	0.0900779	1.2625	0.0153708	-1.00475	0.990492	-1.00773	0.967421	-1.07257	0.464392	-1.14388	0.0396193	1.06206	0.821499	1.04775	0.152636	1.02854	0.877084	-1.00153	0.999992	-1.02013	0.88359	-1.00575	0.908615	1.06297	0.883281	-1.06727	0.949774	1.04281	0.999365
MTHFD2	1.08608	0.677172	1.10154	0.242445	1.44292	0	1.30164	0.00419187	1.17271	0.458173	1.29265	0.0504849	1.01796	0.987167	1.28913	0.694698	-1.07562	0.834566	1.13404	0.665733	1.27922	0.015703	-1.01891	0.973417	1.34528	0.0379325	-1.03464	0.76351	1.08184	0.294006	1.33365	0.340679	1.51829	0	1.01783	0.944931	1.04197	0.999992	-1.05079	0.732629	-1.07092	0.243817	1.16051	0.451632	1.41058	0.470124	-1.0768	0.999365
PFKP	-1.03705	0.936703	1.14956	0.0504573	1.45587	4.63383e-06	1.29707	0.0174478	1.10579	0.5378	-1.00022	0.999343	-1.54903	0.923045	-1.12541	0.953623	-1.24207	0.310875	-1.00415	0.995884	1.15618	0.272283	1.40318	0.37208	-1.04939	0.77663	1.08534	0.490898	1.12308	0.0907418	1.28622	0.358281	2.08736	0	1.23941	0.229631	1.02983	0.999992	-1.25581	0.0698239	-1.21244	0.0396854	-1.01978	0.974595	-1.26665	0.947122	1.05512	0.999365
PKM2
SLC19A1	1.10036	0.421992	-1.01985	0.874921	1.24384	9.81148e-06	1.19879	0.0902256	1.27842	0.176716	1.13597	0.284258	-1.3983	0.818389	1.29323	0.65636	1.04021	0.919768	-1.17573	0.387844	1.22594	0.0719431	-1.01952	0.966552	1.1072	0.501761	1.03858	0.746966	1.1005	0.244685	1.08331	0.780764	1.29727	3.01066e-10	1.01786	0.948632	1.02866	0.999992	1.10342	0.485255	-1.13989	0.0110134	1.20897	0.342201	-1.14174	0.949686	1.03677	0.999365
SLC25A20	-1.08228	0.317645	-1.00775	0.947262	-1.147	0.00170197	1.03557	0.759427	1.08225	0.465865	-1.08491	0.417322	-1.17922	0.880956	-1.02042	0.998148	-1.05901	0.852772	-1.22075	0.0965007	1.01381	0.914157	1.0663	0.827666	1.01812	0.911908	1.12803	0.149364	-1.34234	1.94505e-07	-1.05451	0.827535	-1.31402	3.77965e-14	-1.08046	0.66311	-1.12179	0.999992	1.17008	0.0808846	-1.01427	0.787242	1.00555	0.994994	1.0878	0.949686	1.08605	0.999365
SLC2A1	2.5006	0.000415269	1.03438	0.847199	1.38106	0.000312492	-1.20322	0.512912	1.18158	0.442196	1.66143	0.0237369	1.00212	0.998368	1.10303	0.998148	1.10778	0.889992	-1.25959	0.679468	-1.08946	0.788517	-1.0134	0.989959	1.21827	0.326199	1.21701	0.386148	1.40371	0.00304572	1.21838	0.619516	1.45845	7.40464e-07	1.10554	0.808878	-1.05326	0.999992	-1.12768	0.665322	-1.2627	0.0177908	1.11517	0.871824	-1.23428	0.949686	-1.17643	0.999365
SLC44A4	-2.21528	0.60055	1.30435	0.525777	-1.79528	2.26751e-11	1.00899	0.96644	1.81142	0.133795	-1.4163	0.0179197	-1.11881	0.988282	1.85946	0.564843	-1.02993	0.930465	4.67871	0.190441	-1.16842	0.384721	1.09796	0.859732	-1.55439	0.109105	1.22233	0.127506	-1.70451	0.0692996	-1.50828	0.391193	-2.09679	0	1.07997	0.697816	-1.10606	0.999992	-1.01039	0.954677	1.36544	3.14063e-06	-1.27015	0.92916	-1.38807	0.754536	1.24691	0.999365
