# Supplementary material for: Integrative Analysis Reveals Comprehensive Altered Metabolic Genes Linking with Tumor Epigenetics Modification in Pan-Cancer
Source: Biomed Res Int. 2019 Nov 7;2019:6706354. doi: 10.1155/2019/6706354 (PMC6881592; doi:10.1155/2019/6706354)
Supplement: Supplementary Materials — Supplementary Table 1: the number of sample information and differential expression genes for 11 different cancer types and 5 GEO data projects. Supplementary Table 2: the differential expression gene list and its fold change in 11 cancer types compared with normal samples. Supplementary Table 3: the metabolic genes and the differential expression of metabolic genes. Supplementary Table 4: the function annotations of MDEGs. Supplementary Table 5: the critical different expression genes related to epigenetic modification in the specific types of cancer. Supplementary Table 6: the genes with different expression and methylation influenced by DNMT3B expression. Supplementary Table 7: gene ontology analysis of differential expression and methylation genes. Supplementary Table 8: the correlation between expression and methylation of specific genes. Supplementary Table 9: the oncogene/tumor suppressor mutation frequency and the sample size with mutation across cancer types. Supplementary Table 10: the differential expression MDEGs in mutated samples compared with non-mutated samples across cancer types. Supplementary Table 11: the pathway enrichment analysis in each mutation group. Supplementary Figure 1: relationships among metabolic pathways, cancer types, and oncogene/suppressor gene mutations. [file 6706354.f1.zip › 6706354.f1/Supplementary Table11.xlsx]

## Sheet: Table11-1
Table 11-1 MDEGs in 8 cancer types with driver gene mutations.
Cancer Type	BRCA			COAD			HNSC			KIRC			LIHC			LUAD			LUSC			STAD
mutation gene	MYC	TP53	PIK3CA	APC	KRAS	TP53	PIK3CA	TP53	KMT2D	KMT2C	ARID1A	APC	TP53	ARID1A	MYC	TP53	KRAS	KMT2C	PIK3CA	TP53	KMT2D	ARID1A	PIK3CA	TP53
metabolic gene	NAT1	NAT1	NAT1	STS	AGT	ADH6	ACHE	ACACB		ABCA1	HPD		A2M	ALDH3A1	ACACB	PLIN2			ADH1B	ADH1B		NAT2	ACACB	ADH1B
	ABAT	ABAT	ABAT	PRKAR2B	ARSJ	ALDH3A1	ACPP	ADCY6		DIO1	NPAS2		NAT2	GPX2	AGL	AK1			ADH7	HNMT		ADH6	ACP5	CA4
	ACACB	ACACB	CACNB2	GBA3	B3GNT6	CA8	ADH7	ARSE		GUCY2C	PDE3B		ACYP1		AGXT	AK4			ALDH3B1	PLA2G1B		STS	PLIN2	CD36
	ADCY1	ACADS	CHRM3			CRAT	ALDH1A1	ASS1		MTTP	PLTP		ADH1B		APRT	ALDOC			ALDH3A2	INMT		CA8	ALDH1A1	CDO1
	ADCY5	ACADSB	CKMT1B			ENO2	ALDH3A1	BCAT1		PLTP			ADH4		AKR1C4	ALOX15B			BDH1			TYMP	APOE	CDX2
	ADH1B	ADCY1	F7			FECH	ALOX15	BGN		PROC			ADH6		CYC1	AOC2			CA4			F10	CACNB2	AKR1C4
	ADRA2A	ADCY2	GPC4			GPT	CAV1	CA12		PRODH			AKR1B1		DAO	ARSE			CBR1			GNG7	CD38	CKMT2
	ALDH3A1	ADCY5	GLDC			MAOB	CES1	CAV1		TNFSF13			ASNS		AKR1C1	CA8			CBR3			GNGT1	DCN	DNMT3B
	ALDOC	ADCY6	GNAO1			MTTP	CHIT1	CDA		MTMR7			BCAT1		NQO1	CBR1			ENTPD3			GSTA4	DPP4	DPP4
	ASAH1	ADCY9	GNG4			PFDN4	CHRM3	CHRM3		AKAP5			CBR3		EEF1D	CCT6A			CES1			IDO1	TYMP	F7
	ASNS	PLIN2	GRP			MAPK11	DGKG	CP		TPK1			ENTPD2		G6PD	CKM			DGKG			ISL1	FMO5	FMO1
	ASS1	ADH1B	LDHB			SQLE	AKR1C1	CSPG4		AK7			CD44		GALC	CTH			AKR1C1			MAOB	HK3	GGT7
	CA9	ADRA2A	MGAT3			UGT2B15	AKR1C2	DGKG		ADSSL1			DCN		GGT1	EIF4EBP1			AKR1C2			NOS2	HSPA1B	GNG4
	CA12	ABCD1	OMD			PLA2G3	EPHX1	DCN		AFMID			AKR1C1		GLDC	GSTM3			NQO1			PFKFB2	IDO1	GNG7
	CACNB2	ALOX15B	OGN			PNPLA3	GPC3	AKR1C1		DGKH			DDOST		GPX2	HMMR			EHHADH			PIK3C2G	LDHB	GSTA2
	CD36	AMD1	SNAP25			DEGS2	GCLC	AKR1C2					NQO1		HMGCS2	INHBB			EIF4G1			PRKAA2	OGN	GSTM5
	ENTPD3	ANPEP	ELOVL4				GCLM	DHCR7					DNMT1		HSD17B3	LPL			FECH			PSMB10	PDE3B	GUCY1A3
	ENTPD5	ASAH1	SYT5				GPX2	DHFR					DNMT3B		INHBC	NNMT			FHL2			PSME2	PIK3C2G	GUCY2C
	CHRM3	ASNS	UGT8				GSTA1	DPP4					DTYMK		EIF3E	ODC1			GCLC			RRM2	POLD1	HDC
	CKMT1B	ASS1	BBOX1				GSTM2	EPHX2					EIF4EBP1		MGAT2	OXCT1			GCLM			SLC22A3	PRODH	IDO1
	CP	BCAT1	GALNT5				GSTM3	FMO1					ENO1		ALDH6A1	PDE4C			GNG11			SREBF1	PSMB10	OMD
	NCAN	CA3	NMNAT2				MUC4	FMO3					F9		PIK3R1	PDE4D			GPD1			TYMS	PSME2	OGN
	AKR1C1	CA9	LPIN1				NNMT	GAD1					FABP6		RPL7	PFKFB4			GPX2			WARS	RRM2	PDE1C
	DNMT3B	CA12	PSAT1				PDE9A	GATM					G6PC		RPL8	ABCB4			GPX3			CH25H	SLC22A3	PDE3A
	EPHX2	CACNB2	PLA2G3				PGD	GNGT1					G6PD		RPL13	PLA2G4A			GSR			LIPG	SULT1E1	PDE4D
	F7	CBR3	GALNT13				PIK3CA	GPX2					GCNT1		RPL18A	POLE2			GSTA4			ABCG2	TK1	PIK3C2G
	FABP4	CD38	TUBB2B				PLD1	GRP					GGT5		RPL30	PRIM1			GSTM2			HPSE	TP53	PKLR
	GPC4	ENTPD5					POMC	GSTM2					GPD2		RPS4Y1	PRIM2			GSTM3			PPARGC1A	TYMS	PNMT
	FMO5	CDO1					PPARG	IDO1					GSTM3		TKT	PSPH			GSTM4			PLCB1	WARS	PRELP
	FMOD	CHRM3					SLC6A8	INHBA					HK3		TSTA3	RRM2			ME1			AHCYL2	PLA2G7	PRKAR2B
	FUT8	CP					TBL1X	INHBB					HMMR		EIF3H	SC5D			NNMT			ETHE1	ABCG2	PROC
	GLDC	NCAN					TXNRD1	INPP1					HPD		GPAA1	SLC2A1			ODC1			QPRT	HS3ST1	PTGDS
	GLUL	CTPS1					UGT8	ISL1					HSD3B1		KYNU	SLC2A5			PCYT1A			HAAO	CCT2	PYGM
	GPD1	DDC					XDH	ITPKA					HSD11B1		MTMR4	SLC16A1			PDE2A			FBXO6	PLCB1	RENBP
	GPX2	AKR1C1					AKR1C3	KCNJ11					IMPDH1		LIPG	SLC22A3			PGD			TPK1	PDE7B	SLC22A3
	GRP	AKR1C2					B4GALT4	KHK					ITPA		AASS	SRD5A1			PIK3CA			COQ2	PSAT1	STX1A
	GSTA1	DHCR7					FADS2	LIPE					MARCKS		SLC25A15	ELOVL4			PLD1			PSAT1	PLA2G3	WARS
	IMPA2	DIO1					PCYT1B	LUM					ME1		PPARGC1A	TK1			POLR2H			LAP3	LAP3	AOC3
	IDO1	SARDH					PTGES	CHST6					OGN		PABPC1	TYMS			PSMD2			MLXIPL	NUP107	PDE5A
	KCNC2	DNMT3B					GDA	MGAT3					PAFAH1B3		AADAT	PLA2G10			PSMD11			NANS	ELOVL3	GCNT3
	KCNJ11	EIF4EBP1					ABCC5	MUC4					PCK1		EXOSC4	GEMIN2			TALDO1			ETNK2	ACY3	ABCG2
	LEP	ENO1					NUP210	NOS1					PDE2A		PYCRL	SLC16A4			TBL1X			SMPD3	IL4I1	SLC23A1
	LIPE	EPHX2					PHGDH	NOS2					PDK3		L2HGDH	NUP155			TKT			GALNT16		GLIPR1
	FADS1	F7					PLA2G2D	NPR2					PFDN4		ADSSL1	HS2ST1			TXN			SQRDL		PLA2G16
	LPL	F10					ANKRD1	ODC1					PFKFB4			TUBB4A			TXNRD1			CERS4		AHCYL2
	LRP2	FABP4					PIPOX	PAX6					PGD			AHCYL2			UGDH			HSD3B7		QPRT
	MAOA	FABP6					UGT1A7	PC					PLIN1			QPRT			UGT8			DEGS2		PLA2G2D
	CHST6	FBP1					UGT1A6	PDE6B					POLA1			PHGDH			TUBA1A			FFAR4		PDE7B
	MGAT3	FHIT					PIGX	PLTP					POLD1			ST6GALNAC4			NME5			BCO1		DHDH
	OMD	FMO2					OGDHL	POLA1					POLE2			GRHL1			AKR1C3					SLCO1B3
	PCK1	FMO3					CHST7	POLE					PRELP			PSAT1			B4GALT4					MLXIPL
	PDE4A	FMO5					MCCC1	PRIM1					PRIM1			AMN			GMPS					ETNK2
	PDE9A	FMOD					AKR1B10	PRKAR2B					PRIM2			B3GNT5			EIF2B5					MIOX
	PDE6B	FUT8					PLA2G2F	PROC					PTGS1			TUBB6			PCYT1B					OGDHL
	PDK4	G6PD					TBL1XR1	PRODH					PYCR1			ACY3			GDA					TRIB3
	PLIN1	GAD1					SEMA6D	PTGDS					RDH5			POLR3H			ABCC5					ADHFE1
	POLR2K	GAMT					B3GNT5	PTGS1					RPS4Y1			LDHD			UST					AMDHD1
	POMC	GGT1					DNAJC19	SDC2					RRM2			GPC2			ALG3					CHST13
	PRKAA2	GLA					PPM1L	SLC22A3					SLC2A1			B3GNT8			TUBB3					PLA2G4F
	PRKACB	GLP1R					NMNAT3	STAR					SMS			MUC5B			TUBB4A
	PRKCA	GLUL						SULT1E1					SNRPB			GXYLT2			RAPGEF3
	RDH5	GPD1						TP53					SNRPD2						NUP210
	SQLE	GRP						TYMS					SRD5A2						ANKRD1
	ABCC8	GSTA1						ST8SIA2					SRM						PSAT1
	TAT	GSTM2						PIK3R3					STX1A						G0S2
	UGT2B15	GSTM3						PPAP2B					TALDO1						CHST11
	UGT8	GSTP1						DHRS3					TAT						UGT1A6
	YWHAZ	HK3						B4GALT6					TK1						PIGX
	NME5	HMGCS2						FADS2					TKT						CHST7
	DDO	HMMR						PCYT1B					TUBA3C						EIF5A2
	AOC3	HNMT						HS3ST4					TXNRD1						MCCC1
	INPP4B	HPD						HS3ST1					TYMS						AKR1B10
	FADS2	HSD17B4						GNE					UGDH						TBL1XR1
	CHST2	IDS						UST					UPP1						AMN
	AKAP5	IDUA						TUBB3					TEAD2						B3GNT5
	GNA14	IMPA2						TUBB4A					GEMIN2						AGPAT9
	PTDSS1	IDO1						GALNT6					KMO						EPT1
	AASS	ITPKA						FKBP9					AKR1C3						HS6ST2
	B3GNT3	IVD						GPD1L					EIF3B						DNAJC19
	TUBB4A	KCNC2						NUP210					SPHK1						ADHFE1
	RAPGEF3	KCNJ11						PLCB1					SLC16A3
	POLR3G	LBR						SEC61G					PTGES
	UGT2B11	LDHB						HAAO					GNA14
	ME3	LEP						SLC16A8					NUP93
	PPARGC1A	LIPE						HACL1					GNPDA1
	RAPGEF4	LRP2						PHGDH					TUBA1B
	GALNT6	MAOA						PLA2G2D					TOMM40
	GALNT5	MAOB						SLCO1B3					NOP56
	LPIN1	CHST6						MLXIPL					FTCD
	CA14	ME1						ACP6					PPARGC1A
	MTHFD1L	MGAT3						ISYNA1					UGT2A1
	AK5	ALDH6A1						SMOX					SLC27A5
	PABPC1	MUC2						UGT1A7					TREH
	ANKRD1	NME3						CHDH					INMT
	HPGDS	ODC1						OGDHL					CCT5
	PSAT1	OMD						MUC13					CDK19
	CSAD	OGN						NT5M					GPD1L
	GALNT7	PDE1A						CHPT1					NUP210
	CROT	PDE2A						WBSCR17					PLCB1
	ELOVL2	PDE4A						CHPF					ACSL6
	ACSM5	PDE7A						LPCAT1					NUP188
	GALNT10	PDE9A						SEMA6D					POLA2
	AKR1B10	PDE6B						PNPLA3					PHGDH
	ELOVL5	PDK1						ELOVL3					FBXO6
	SEMA6D	PDK4						ACY3					GNMT
	PNPLA3	ENPP3						MUC16					DHDH
	SLC19A3	PFKP						GNG8					SLCO1B3
	SLC44A4	ABCB1						GALNT15					CHST11
	ELOVL3	PLA2G4A						GGT6					PDE11A
	B3GNT5	PLD1						GPAT2					SMOX
	GPT2	PLIN1						GPC2					UGT1A6
	MED30	PNMT						IL4I1					LPCAT2
	B3GNT7	POMC						P4HA3					CSGALNACT1
	MUC16	PPARA											SMG9
	TUBA3D	MED1											EIF5A2
	GALNT13	PRKAA2											POLE4
	GALNT15	PRKACB											AGPAT4
	PLD4	PSMB9											AKR1B10
	DEGS2	PSPH											NUP107
	ACMSD	QDPR											TRIB3
	RDH10	RBP2											PLBD1
	SLC44A5	RRM2											STARD5
	ST8SIA6	ACSM3											B3GNT5
	ACER2	SLC2A5											GPT2
	CKMT1A	SLC16A1											CNDP1
		SQLE											TUBA1C
		SRD5A1											PLCD4
		SREBF1											APOA5
		ELOVL4											PIGU
		SULT1A1											MUC15
		SUOX											GPAT2
		ABCC8											SLC44A5
		VAMP2											IL4I1
		TAT											PGP
		TDO2											TUBB2B
		TPH1											NUP43
		TPO											GXYLT2
		TUBA4A											PKM
		TYMS
		UGCG
		UGT2B7
		UGT2B15
		UGT2B17
		UGT8
		WARS
		ZFP36
		PLA2G7
		PNPLA4
		ACOX2
		NME5
		PLA2G10
		BBOX1
		DDO
		PDXK
		AOC3
		PDE5A
		JMJD7-PLA2G4B
		TNFSF13
		PEX11A
		INPP4B
		ALDH1A2
		SLC5A6
		KYNU
		MGAM
		PIGQ
		SLC16A4
		LRAT
		FADS2
		ABCG2
		CHST2
		CHST3
		AKAP5
		ABCG1
		GNA14
		AASS
		B3GNT3
		TUBB3
		TUBB4A
		ST3GAL6
		RAPGEF3
		SLC19A2
		ST6GALNAC2
		POLR3G
		MTHFD2
		ME3
		PPARGC1A
		SLC27A2
		RAPGEF4
		INMT
		GALNT6
		GALNT5
		ARSG
		GPD1L
		LPIN1
		PSME4
		MED13L
		HAAO
		CA14
		MTHFD1L
		GLCE
		PHGDH
		FBXL5
		PLA2G2D
		AK5
		PABPC1
		ANKRD1
		INPP5J
		TNFRSF21
		DHDH
		HPGDS
		PSAT1
		PLA2G3
		MLXIPL
		AADAT
		GCNT4
		CSAD
		HEMK1
		GNG13
		GALNT7
		SMOX
		ELOVL2
		ACSM5
		CHDH
		GALNT10
		MCCC1
		AKR1B10
		PNPLA2
		GALNT16
		ELOVL5
		BCAN
		MCCC2
		THTPA
		CERS4
		GALNT14
		GALNT12
		SEMA6D
		PNPLA3
		SLC44A4
		PLA2G12A
		ELOVL3
		NUDT12
		B3GNT5
		DGAT2
		GPT2
		TUBA1C
		PLCD4
		MED30
		G6PC3
		B3GNT7
		MUC16
		PLCD3
		SLC46A1
		TUBA3D
		GALNT13
		GALNT15
		MUCL1
		AK7
		PLD4
		DEGS2
		ACMSD
		PPARGC1B
		MUC15
		AMDHD1
		RDH10
		NAGS
		ADCY4
		GPC2
		PLA2G4F
		IL4I1
		HS6ST3
		ST8SIA6
		ACER2
		TUBB2B
		NMNAT3
		B3GNT8
		SLC27A1
		CA13
		ENTPD8
		IYD
		D2HGDH

## Sheet: Table11-2
Table 11-2 The membership of the subpathways in main category.
Pathways
1. Metabolism
1.0 Global and overview maps
Metabolic pathways
Biosynthesis of secondary metabolites
Microbial metabolism in diverse environments
Biosynthesis of antibiotics
Carbon metabolism
2-Oxocarboxylic acid metabolism
Fatty acid metabolism
Carbon metabolism
Degradation of aromatic compounds
1.1 Carbohydrate metabolism
Glycolysis / Gluconeogenesis
Citrate cycle (TCA cycle)
Pentose phosphate pathway
Pentose and glucuronate interconversions
Fructose and mannose metabolism
Galactose metabolism
Ascorbate and aldarate metabolism
Starch and sucrose metabolism
Amino sugar and nucleotide sugar metabolism
Pyruvate metabolism
Glyoxylate and dicarboxylate metabolism
Propanoate metabolism
Butanoate metabolism
C5-Branched dibasic acid metabolism
Inositol phosphate metabolism
1.2 Energy metabolism
Oxidative phosphorylation
Photosynthesis
Photosynthesis - antenna proteins
Carbon fixation in photosynthetic organisms
Carbon fixation pathways in prokaryotes
Methane metabolism
Nitrogen metabolism
Sulfur metabolism
1.3 Lipid metabolism
Fatty acid biosynthesis
Fatty acid elongation
Fatty acid degradation
Synthesis and degradation of ketone bodies
Cutin, suberine and wax biosynthesis
Steroid biosynthesis
Primary bile acid biosynthesis
Secondary bile acid biosynthesis
Steroid hormone biosynthesis
Glycerolipid metabolism
Glycerophospholipid metabolism
Ether lipid metabolism
Sphingolipid metabolism
Arachidonic acid metabolism
Linoleic acid metabolism
alpha-Linolenic acid metabolism
Biosynthesis of unsaturated fatty acids
1.4 Nucleotide metabolism
Purine metabolism
Pyrimidine metabolism
1.5 Amino acid metabolism
Alanine, aspartate and glutamate metabolism
Glycine, serine and threonine metabolism
Cysteine and methionine metabolism
Valine, leucine and isoleucine degradation
Valine, leucine and isoleucine biosynthesis
Lysine biosynthesis
Lysine degradation
Arginine biosynthesis
Arginine and proline metabolism
Histidine metabolism
Tyrosine metabolism
Phenylalanine metabolism
Tryptophan metabolism
Phenylalanine, tyrosine and tryptophan biosynthesis
1.6 Metabolism of other amino acids
beta-Alanine metabolism
Taurine and hypotaurine metabolism
Phosphonate and phosphinate metabolism
Selenocompound metabolism
Cyanoamino acid metabolism
D-Glutamine and D-glutamate metabolism
D-Arginine and D-ornithine metabolism
D-Alanine metabolism
Glutathione metabolism
1.7 Glycan biosynthesis and metabolism
N-Glycan biosynthesis
Various types of N-glycan biosynthesis
Mucin type O-glycan biosynthesis
Mannose type O-glycan biosynthesis
Other types of O-glycan biosynthesis
Glycosaminoglycan biosynthesis - chondroitin sulfate / dermatan sulfate
Glycosaminoglycan biosynthesis - heparan sulfate / heparin
Glycosaminoglycan biosynthesis - keratan sulfate
Glycosaminoglycan degradation
Glycosylphosphatidylinositol (GPI)-anchor biosynthesis
Glycosphingolipid biosynthesis - lacto and neolacto series
Glycosphingolipid biosynthesis - globo and isoglobo series
Glycosphingolipid biosynthesis - ganglio series
Lipopolysaccharide biosynthesis
Peptidoglycan biosynthesis
Other glycan degradation
Lipoarabinomannan (LAM) biosynthesis
Arabinogalactan biosynthesis - Mycobacterium
1.8 Metabolism of cofactors and vitamins
Thiamine metabolism
Riboflavin metabolism
Vitamin B6 metabolism
Nicotinate and nicotinamide metabolism
Pantothenate and CoA biosynthesis
Biotin metabolism
Lipoic acid metabolism
Folate biosynthesis
One carbon pool by folate
Retinol metabolism
Porphyrin and chlorophyll metabolism
Ubiquinone and other terpenoid-quinone biosynthesis
1.9 Metabolism of terpenoids and polyketides
Terpenoid backbone biosynthesis
Monoterpenoid biosynthesis
Sesquiterpenoid and triterpenoid biosynthesis
Diterpenoid biosynthesis
Carotenoid biosynthesis
Brassinosteroid biosynthesis
Insect hormone biosynthesis
Zeatin biosynthesis
Limonene and pinene degradation
Geraniol degradation
Type I polyketide structures
Biosynthesis of 12-, 14- and 16-membered macrolides
Biosynthesis of ansamycins
Biosynthesis of enediyne antibiotics
Biosynthesis of type II polyketide backbone
Biosynthesis of type II polyketide products
Tetracycline biosynthesis
Polyketide sugar unit biosynthesis
Nonribosomal peptide structures
Biosynthesis of siderophore group nonribosomal peptides
Biosynthesis of vancomycin group antibiotics
1.10 Biosynthesis of other secondary metabolites
Phenylpropanoid biosynthesis
Stilbenoid, diarylheptanoid and gingerol biosynthesis
Flavonoid biosynthesis
Flavone and flavonol biosynthesis
Anthocyanin biosynthesis
Isoflavonoid biosynthesis
Indole alkaloid biosynthesis
Indole diterpene alkaloid biosynthesis
Isoquinoline alkaloid biosynthesis
Tropane, piperidine and pyridine alkaloid biosynthesis
Acridone alkaloid biosynthesis
Caffeine metabolism
Betalain biosynthesis
Glucosinolate biosynthesis
Benzoxazinoid biosynthesis
Penicillin and cephalosporin biosynthesis
Carbapenem biosynthesis
Monobactam biosynthesis
Clavulanic acid biosynthesis
Streptomycin biosynthesis
Neomycin, kanamycin and gentamicin biosynthesis
Acarbose and validamycin biosynthesis
Puromycin biosynthesis
Novobiocin biosynthesis
Staurosporine biosynthesis
Phenazine biosynthesis
Prodigiosin biosynthesis
Aflatoxin biosynthesis
Biosynthesis of secondary metabolites - other antibiotics New!
Biosynthesis of secondary metabolites - unclassified
1.11 Xenobiotics biodegradation and metabolism
Benzoate degradation
Aminobenzoate degradation
Fluorobenzoate degradation
Chloroalkane and chloroalkene degradation
Chlorocyclohexane and chlorobenzene degradation
Toluene degradation
Xylene degradation
Nitrotoluene degradation
Ethylbenzene degradation
Styrene degradation
Atrazine degradation
Caprolactam degradation
Bisphenol degradation
Dioxin degradation
Naphthalene degradation
Polycyclic aromatic hydrocarbon degradation
Furfural degradation
Steroid degradation
Metabolism of xenobiotics by cytochrome P450
Drug metabolism - cytochrome P450
Drug metabolism - other enzymes
1.12 Chemical structure transformation maps
Overview of biosynthetic pathways
Biosynthesis of plant secondary metabolites
Biosynthesis of phenylpropanoids
Biosynthesis of terpenoids and steroids
Biosynthesis of alkaloids derived from shikimate pathway
Biosynthesis of alkaloids derived from ornithine, lysine and nicotinic acid
Biosynthesis of alkaloids derived from histidine and purine
Biosynthesis of alkaloids derived from terpenoid and polyketide
Biosynthesis of plant hormones
2. Genetic Information Processing
2.1 Transcription
RNA polymerase
Basal transcription factors
Spliceosome
2.2 Translation
Ribosome
Aminoacyl-tRNA biosynthesis
RNA transport
mRNA surveillance pathway
Ribosome biogenesis in eukaryotes
2.3 Folding, sorting and degradation
Protein export
Protein processing in endoplasmic reticulum
SNARE interactions in vesicular transport
Ubiquitin mediated proteolysis
Sulfur relay system
Proteasome
RNA degradation
2.4 Replication and repair
DNA replication
Base excision repair
Nucleotide excision repair
Mismatch repair
Homologous recombination
Non-homologous end-joining
Fanconi anemia pathway
3. Environmental Information Processing
3.1 Membrane transport
ABC transporters
Phosphotransferase system (PTS)
Bacterial secretion system
3.2 Signal transduction
Two-component system
Ras signaling pathway
Rap1 signaling pathway
MAPK signaling pathway
MAPK signaling pathway - fly
MAPK signaling pathway - plant
MAPK signaling pathway - yeast
ErbB signaling pathway
Wnt signaling pathway
Notch signaling pathway
Hedgehog signaling pathway
Hedgehog signaling pathway - fly
TGF-beta signaling pathway
Hippo signaling pathway
Hippo signaling pathway - fly
Hippo signaling pathway - multiple species
VEGF signaling pathway
Apelin signaling pathway
Jak-STAT signaling pathway
NF-kappa B signaling pathway
TNF signaling pathway
HIF-1 signaling pathway
FoxO signaling pathway
Calcium signaling pathway
Phosphatidylinositol signaling system
Phospholipase D signaling pathway
Sphingolipid signaling pathway
cAMP signaling pathway
cGMP-PKG signaling pathway
PI3K-Akt signaling pathway
AMPK signaling pathway
mTOR signaling pathway
Plant hormone signal transduction
3.3 Signaling molecules and interaction
Neuroactive ligand-receptor interaction
Cytokine-cytokine receptor interaction
Viral protein interaction with cytokine and cytokine receptor
ECM-receptor interaction
Cell adhesion molecules (CAMs)
4. Cellular Processes
4.1 Transport and catabolism
Endocytosis
Phagosome
Lysosome
Peroxisome
Autophagy - animal
Autophagy - yeast
Autophagy - other
Mitophagy - animal
Mitophagy - yeast
4.2 Cell growth and death
Cell cycle
Cell cycle - yeast
Cell cycle - Caulobacter
Meiosis - yeast
Oocyte meiosis
Apoptosis
Apoptosis - fly
Apoptosis - multiple species
Ferroptosis
Necroptosis
p53 signaling pathway
Cellular senescence
4.3 Cellular community - eukaryotes
Focal adhesion
Adherens junction
Tight junction
Gap junction
Signaling pathways regulating pluripotency of stem cells
4.4 Cellular community - prokaryotes
Quorum sensing
Biofilm formation - Vibrio cholerae
Biofilm formation - Pseudomonas aeruginosa
Biofilm formation - Escherichia coli
4.5 Cell motility
Bacterial chemotaxis
Flagellar assembly
Regulation of actin cytoskeleton
5. Organismal Systems
5.1 Immune system
Hematopoietic cell lineage
Complement and coagulation cascades
Platelet activation
Toll-like receptor signaling pathway
Toll and Imd signaling pathway
NOD-like receptor signaling pathway
RIG-I-like receptor signaling pathway
Cytosolic DNA-sensing pathway
C-type lectin receptor signaling pathway
Natural killer cell mediated cytotoxicity
Antigen processing and presentation
T cell receptor signaling pathway
Th1 and Th2 cell differentiation
Th17 cell differentiation
IL-17 signaling pathway
B cell receptor signaling pathway
Fc epsilon RI signaling pathway
Fc gamma R-mediated phagocytosis
Leukocyte transendothelial migration
Intestinal immune network for IgA production
Chemokine signaling pathway
5.2 Endocrine system
Insulin secretion
Insulin signaling pathway
Glucagon signaling pathway
Regulation of lipolysis in adipocytes
Adipocytokine signaling pathway
PPAR signaling pathway
GnRH secretion New!
GnRH signaling pathway
Ovarian steroidogenesis
Estrogen signaling pathway
Progesterone-mediated oocyte maturation
Prolactin signaling pathway
Oxytocin signaling pathway
Relaxin signaling pathway
Thyroid hormone synthesis
Thyroid hormone signaling pathway
Parathyroid hormone synthesis, secretion and action
Melanogenesis
Renin secretion
Renin-angiotensin system
Aldosterone synthesis and secretion
Cortisol synthesis and secretion
5.3 Circulatory system
Cardiac muscle contraction
Adrenergic signaling in cardiomyocytes
Vascular smooth muscle contraction
5.4 Digestive system
Salivary secretion
Gastric acid secretion
Pancreatic secretion
Bile secretion
Carbohydrate digestion and absorption
Protein digestion and absorption
Fat digestion and absorption
Cholesterol metabolism
Vitamin digestion and absorption
Mineral absorption
5.5 Excretory system
Vasopressin-regulated water reabsorption
Aldosterone-regulated sodium reabsorption
Endocrine and other factor-regulated calcium reabsorption
Proximal tubule bicarbonate reclamation
Collecting duct acid secretion
5.6 Nervous system
Glutamatergic synapse
GABAergic synapse
Cholinergic synapse
Dopaminergic synapse
Serotonergic synapse
Long-term potentiation
Long-term depression
Retrograde endocannabinoid signaling
Synaptic vesicle cycle
Neurotrophin signaling pathway
5.7 Sensory system
Phototransduction
Phototransduction - fly
Olfactory transduction
Taste transduction
Inflammatory mediator regulation of TRP channels
5.8 Development and regeneration
Dorso-ventral axis formation
Axon guidance
Axon regeneration New!
Osteoclast differentiation
5.9 Aging
Longevity regulating pathway
Longevity regulating pathway - worm
Longevity regulating pathway - multiple species
5.10 Environmental adaptation
Circadian rhythm
Circadian entrainment
Circadian rhythm - fly
Circadian rhythm - plant
Thermogenesis
Plant-pathogen interaction
6. Human Diseases
6.1 Cancer: overview
[Cancer network viewer]
Pathways in cancer
Transcriptional misregulation in cancer
MicroRNAs in cancer
Proteoglycans in cancer
Chemical carcinogenesis
Viral carcinogenesis
Central carbon metabolism in cancer
Choline metabolism in cancer
PD-L1 expression and PD-1 checkpoint pathway in cancer
6.2 Cancer: specific types
Colorectal cancer
Pancreatic cancer
Hepatocellular carcinoma
Gastric cancer
Glioma
Thyroid cancer
Acute myeloid leukemia
Chronic myeloid leukemia
Basal cell carcinoma
Melanoma
Renal cell carcinoma
Bladder cancer
Prostate cancer
Endometrial cancer
Breast cancer
Small cell lung cancer
Non-small cell lung cancer
6.3 Immune disease
Asthma
Systemic lupus erythematosus
Rheumatoid arthritis
Autoimmune thyroid disease
Inflammatory bowel disease (IBD)
Allograft rejection
Graft-versus-host disease
Primary immunodeficiency
6.4 Neurodegenerative disease
Alzheimer disease
Parkinson disease
Amyotrophic lateral sclerosis (ALS)
Huntington disease
Prion diseases
6.5 Substance dependence
Cocaine addiction
Amphetamine addiction
Morphine addiction
Nicotine addiction
Alcoholism
6.6 Cardiovascular disease
Fluid shear stress and atherosclerosis
Hypertrophic cardiomyopathy (HCM)
Arrhythmogenic right ventricular cardiomyopathy (ARVC)
Dilated cardiomyopathy (DCM)
Viral myocarditis
6.7 Endocrine and metabolic disease
Type II diabetes mellitus
Type I diabetes mellitus
Maturity onset diabetes of the young
Non-alcoholic fatty liver disease (NAFLD)
Insulin resistance
AGE-RAGE signaling pathway in diabetic complications
Cushing syndrome
6.8 Infectious disease: bacterial
Vibrio cholerae infection
Epithelial cell signaling in Helicobacter pylori infection
Pathogenic Escherichia coli infection
Salmonella infection
Shigellosis
Yersinia infection New!
Pertussis
Legionellosis
Staphylococcus aureus infection
Tuberculosis
Bacterial invasion of epithelial cells
6.9 Infectious disease: viral
Human T-cell leukemia virus 1 infection
Human immunodeficiency virus 1 infection
Measles
Influenza A
Hepatitis B
Hepatitis C
Herpes simplex virus 1 infection
Human cytomegalovirus infection
Kaposi sarcoma-associated herpesvirus infection
Epstein-Barr virus infection
Human papillomavirus infection
6.10 Infectious disease: parasitic
Amoebiasis
Malaria
Toxoplasmosis
Leishmaniasis
Chagas disease (American trypanosomiasis)
African trypanosomiasis
6.11 Drug resistance: antimicrobial
beta-Lactam resistance
Vancomycin resistance
Cationic antimicrobial peptide (CAMP) resistance
6.12 Drug resistance: antineoplastic
EGFR tyrosine kinase inhibitor resistance
Platinum drug resistance
Antifolate resistance
Endocrine resistance
7. Drug Development
7.1 Chronology: Antiinfectives
Penicillins
Cephalosporins - parenteral agents
Cephalosporins - oral agents
Aminoglycosides
Tetracyclines
Macrolides and ketolides
Quinolones
Rifamycins
Antifungal agents
Antiviral agents
Anti-HIV agents
7.2 Chronology: Antineoplastics
Antineoplastics - alkylating agents
Antineoplastics - antimetabolic agents
Antineoplastics - agents from natural products
Antineoplastics - hormones
Antineoplastics - protein kinases inhibitors
7.3 Chronology: Nervous system agents
Hypnotics
Anxiolytics
Anticonvulsants
Local analgesics
Opioid analgesics
Antipsychotics
Antipsychotics - phenothiazines
Antipsychotics - butyrophenones
Antidepressants
Agents for Alzheimer-type dementia
Antiparkinsonian agents
7.4 Chronology: Other drugs
Sulfonamide derivatives - overview
Sulfonamide derivatives - sulfa drugs
Sulfonamide derivatives - diuretics
Sulfonamide derivatives - hypoglycemic agents
Antiarrhythmic drugs
Antiulcer drugs
Immunosuppressive agents
Osteoporosis drugs
Antimigraines
Antithrombosis agents
Antirheumatics - DMARDs and biological agents
Antidiabetics
Antidyslipidemic agents
Antiglaucoma agents
7.5 Target-based classification: G protein-coupled receptors
Cholinergic and anticholinergic drugs
alpha-Adrenergic receptor agonists/antagonists
beta-Adrenergic receptor agonists/antagonists
Dopamine receptor agonists/antagonists
Histamine H1 receptor antagonists
Histamine H2/H3 receptor agonists/antagonists
Serotonin receptor agonists/antagonists
Eicosanoid receptor agonists/antagonists
Opioid receptor agonists/antagonists
Angiotensin receptor and endothelin receptor antagonists
7.6 Target-based classification: Nuclear receptors
Glucocorticoid and mineralocorticoid receptor agonists/antagonists
Progesterone, androgen and estrogen receptor agonists/antagonists
Retinoic acid receptor (RAR) and retinoid X receptor (RXR) agonists/antagonists
Peroxisome proliferator-activated receptor (PPAR) agonists
7.7 Target-based classification: Ion channels
Nicotinic cholinergic receptor antagonists
GABA-A receptor agonists/antagonists
Calcium channel blocking drugs
Sodium channel blocking drugs
Potassium channel blocking and opening drugs
N-Metyl-D-aspartic acid receptor antagonists
7.8 Target-based classification: Transporters
Ion transporter inhibitors
Neurotransmitter transporter inhibitors
7.9 Target-based classification: Enzymes
Catecholamine transferase inhibitors
Cyclooxygenase inhibitors
HMG-CoA reductase inhibitors
Renin-angiotensin system inhibitors
HIV protease inhibitors
7.10 Structure-based classification
Quinolines
Eicosanoids
Prostaglandins
7.11 Skeleton-based classification
Benzoic acid family
1,2-Diphenyl substitution family
Naphthalene family
Benzodiazepine family

## Sheet: Table11-3
Table 11-3 The secondery pathways are in 8 cancers with driver mutations. 1 present represents the genes in metabolic pathways is significantly different expressed in samples with specific oncogene/suppressor gene’ mutations; 0 present non-significant difference.
Pathway	BRCA-TP53 mutation	COAD-TP53 mutation	HNSC-TP53 mutation	LIHC-TP53 mutation	LUAD-TP53 mutation	STAD-TP53 mutation	BRCA-MYC mutation	BRCA-PIK3CA mutation	HNSC-PIK3CA mutation	LIHC-MYC mutation	LUSC-PIK3CA mutation	STAD-ARID1A mutation	STAD-PIK3CA mutation
Global and overview maps	1	0	1	1	1	0	1	0	1	1	1	0	0
Carbohydrate metabolism	1	1	1	1	0	0	1	0	1	0	1	0	0
Energy metabolism	1	0	0	0	0	0	1	0	0	0	0	0	0
Lipid metabolism	1	0	1	1	1	1	1	0	1	1	1	1	0
Nucleotide metabolism	1	0	1	1	1	1	1	0	1	0	1	1	1
Amino acid metabolism	1	1	1	1	1	1	1	0	0	1	1	1	0
Metabolism of other amino acids	1	0	1	1	1	1	1	0	1	1	1	1	0
Glycan biosynthesis and metabolism	1	0	1	0	0	0	1	0	0	0	1	0	0
Metabolism of cofactors and vitamins	1	0	0	1	0	0	1	0	1	0	1	0	0
Xenobiotics biodegradation and metabolism	1	1	1	1	0	1	1	0	1	0	1	1	0
Translation	0	0	0	1	1	0	0	0	0	1	0	0	0
Replication and repair	0	0	1	1	1	0	0	0	0	0	0	0	0
Signal transduction	1	0	1	1	0	1	1	0	1	1	1	1	1
Transport and catabolism	1	0	1	0	0	0	1	0	0	0	0	0	0
Cell growth and death	1	0	0	0	0	0	1	0	1	0	0	0	0
Cellular community - eukaryotes	1	0	1	1	0	0	1	0	0	0	1	0	0
Immune system	1	0	1	0	0	0	0	0	0	0	0	1	0
Endocrine system	1	0	1	1	0	1	1	0	0	1	1	1	1
Circulatory system	1	0	1	0	0	1	1	0	0	0	0	0	0
Digestive system	1	0	1	1	0	0	1	0	1	0	0	0	1
Excretory system	1	0	0	0	0	0	0	0	0	0	0	0	0
Nervous system	1	0	1	0	0	1	1	1	1	0	0	1	0
Sensory system	1	0	0	0	0	0	1	0	0	0	0	0	0
Aging	1	0	1	0	0	0	1	0	0	0	0	0	0
Environmental adaptation	1	0	1	0	0	1	1	0	0	0	0	1	0
Cancer: overview	1	1	1	1	1	1	1	0	1	0	1	1	0
Cancer: specific types	0	0	1	0	0	0	0	0	0	0	0	0	0
Substance dependence	1	0	1	0	0	1	1	0	0	0	0	1	0
Cardiovascular disease	1	0	1	0	0	0	1	0	1	0	1	0	0
Endocrine and metabolic disease	1	0	0	1	0	1	1	0	0	1	0	1	0
Infectious disease: bacterial	1	0	0	1	0	0	1	0	0	0	1	0	0
Infectious disease: viral	0	0	0	0	0	0	1	0	0	0	1	0	1
Infectious disease: parasitic	0	0	0	0	0	0	1	0	0	0	0	0	0
Drug resistance: antineoplastic	1	0	1	0	0	0	0	0	1	0	1	0	0

## Sheet: BRCA-TP53
Table 11-4 The KEGG annotations are filtered by Entities pVal < 0.05 in BRCA with TP53 mutation.
GroupID	Category	Term	Description	LogP	Log(q-value)	InTerm_InList	Genes	Symbols
1_Member	KEGG Pathway	hsa00230	Purine metabolism	-15.9924	-12.6076	22/174	107,108,111,112,115,957,2272,4832,5136,5138,5141,5150,5152,5158,5169,6241,8654,10622,26289,122481,196883,377841	ADCY1,ADCY2,ADCY5,ADCY6,ADCY9,ENTPD5,FHIT,NME3,PDE1A,PDE2A,PDE4A,PDE7A,PDE9A,PDE6B,ENPP3,RRM2,PDE5A,POLR3G,AK5,AK7,ADCY4,ENTPD8
1_Member	KEGG Pathway	hsa00240	Pyrimidine metabolism	-4.53683	-3.07102	8/104	957,1503,4832,5169,6241,7298,10622,377841	ENTPD5,CTPS1,NME3,ENPP3,RRM2,TYMS,POLR3G,ENTPD8
2_Member	KEGG Pathway	hsa00380	Tryptophan metabolism	-13.7108	-10.627	12/40	1644,3620,4128,4129,6999,7166,8942,11185,23498,51166,130013,259307	DDC,IDO1,MAOA,MAOB,TDO2,TPH1,KYNU,INMT,HAAO,AADAT,ACMSD,IL4I1
2_Member	KEGG Pathway	hsa00350	Tyrosine metabolism	-11.2753	-8.79353	10/35	125,1644,3242,4128,4129,5409,6898,7173,8639,259307	ADH1B,DDC,HPD,MAOA,MAOB,PNMT,TAT,TPO,AOC3,IL4I1
2_Member	KEGG Pathway	hsa00360	Phenylalanine metabolism	-9.33767	-7.25381	7/17	1644,3242,4128,4129,6898,8639,259307	DDC,HPD,MAOA,MAOB,TAT,AOC3,IL4I1
2_Member	KEGG Pathway	hsa04726	Serotonergic synapse	-8.09011	-6.19658	12/113	111,247,1644,4128,4129,5321,5567,7166,8681,10411,51764,255189	ADCY5,ALOX15B,DDC,MAOA,MAOB,PLA2G4A,PRKACB,TPH1,JMJD7-PLA2G4B,RAPGEF3,GNG13,PLA2G4F
2_Member	KEGG Pathway	hsa00340	Histidine metabolism	-5.14473	-3.56602	5/24	1644,3176,4128,4129,144193	DDC,HNMT,MAOA,MAOB,AMDHD1
2_Member	KEGG Pathway	hsa05030	Cocaine addiction	-3.59556	-2.21067	5/49	111,1644,4128,4129,5567	ADCY5,DDC,MAOA,MAOB,PRKACB
2_Member	KEGG Pathway	hsa05031	Amphetamine addiction	-2.93546	-1.59979	5/68	111,1644,4128,4129,5567	ADCY5,DDC,MAOA,MAOB,PRKACB
2_Member	KEGG Pathway	hsa04728	Dopaminergic synapse	-2.383	-1.11868	6/130	111,1644,4128,4129,5567,51764	ADCY5,DDC,MAOA,MAOB,PRKACB,GNG13
3_Member	KEGG Pathway	hsa00982	Drug metabolism - cytochrome P450	-13.2089	-10.3012	14/70	125,2327,2328,2330,2938,2946,2947,2950,4128,4129,7364,7366,7367,27306	ADH1B,FMO2,FMO3,FMO5,GSTA1,GSTM2,GSTM3,GSTP1,MAOA,MAOB,UGT2B7,UGT2B15,UGT2B17,HPGDS
3_Member	KEGG Pathway	hsa00980	Metabolism of xenobiotics by cytochrome P450	-10.2686	-7.99765	12/74	125,874,1645,2938,2946,2947,2950,7364,7366,7367,27294,27306	ADH1B,CBR3,AKR1C1,GSTA1,GSTM2,GSTM3,GSTP1,UGT2B7,UGT2B15,UGT2B17,DHDH,HPGDS
3_Member	KEGG Pathway	hsa05204	Chemical carcinogenesis	-9.72735	-7.57291	12/82	9,125,1646,2938,2946,2947,2950,6817,7364,7366,7367,27306	NAT1,ADH1B,AKR1C2,GSTA1,GSTM2,GSTM3,GSTP1,SULT1A1,UGT2B7,UGT2B15,UGT2B17,HPGDS
3_Member	KEGG Pathway	hsa00480	Glutathione metabolism	-9.24437	-7.1817	10/54	290,2539,2678,2938,2946,2947,2950,4953,6241,27306	ANPEP,G6PD,GGT1,GSTA1,GSTM2,GSTM3,GSTP1,ODC1,RRM2,HPGDS
3_Member	KEGG Pathway	hsa05418	Fluid shear stress and atherosclerosis	-2.1982	-0.946849	6/142	445,2938,2946,2947,2950,5563	ASS1,GSTA1,GSTM2,GSTM3,GSTP1,PRKAA2
4_Member	KEGG Pathway	M00056	O-glycan biosynthesis, mucin type core	-12.5775	-9.89162	10/27	11226,11227,51301,51809,55568,57452,79623,79695,114805,117248	GALNT6,GALNT5,GCNT4,GALNT7,GALNT10,GALNT16,GALNT14,GALNT12,GALNT13,GALNT15
4_Member	KEGG Pathway	hsa_M00056	O-glycan biosynthesis, mucin type core	-12.5775	-9.89162	10/27	11226,11227,51301,51809,55568,57452,79623,79695,114805,117248	GALNT6,GALNT5,GCNT4,GALNT7,GALNT10,GALNT16,GALNT14,GALNT12,GALNT13,GALNT15
4_Member	KEGG Pathway	hsa00512	Mucin type O-glycan biosynthesis	-11.8745	-9.26777	10/31	11226,11227,51301,51809,55568,57452,79623,79695,114805,117248	GALNT6,GALNT5,GCNT4,GALNT7,GALNT10,GALNT16,GALNT14,GALNT12,GALNT13,GALNT15
5_Member	KEGG Pathway	hsa00565	Ether lipid metabolism	-11.5247	-8.98495	11/45	5321,5337,7368,7941,8399,8681,26279,50487,81579,122618,255189	PLA2G4A,PLD1,UGT8,PLA2G7,PLA2G10,JMJD7-PLA2G4B,PLA2G2D,PLA2G3,PLA2G12A,PLD4,PLA2G4F
5_Member	KEGG Pathway	hsa00590	Arachidonic acid metabolism	-11.2218	-8.79118	12/62	247,874,2053,2678,5321,8399,8681,26279,27306,50487,81579,255189	ALOX15B,CBR3,EPHX2,GGT1,PLA2G4A,PLA2G10,JMJD7-PLA2G4B,PLA2G2D,HPGDS,PLA2G3,PLA2G12A,PLA2G4F
5_Member	KEGG Pathway	hsa00592	alpha-Linolenic acid metabolism	-9.5703	-7.46416	8/25	5321,8399,8681,9415,26279,50487,81579,255189	PLA2G4A,PLA2G10,JMJD7-PLA2G4B,FADS2,PLA2G2D,PLA2G3,PLA2G12A,PLA2G4F
5_Member	KEGG Pathway	hsa00564	Glycerophospholipid metabolism	-8.96601	-7.01248	12/95	2819,5321,5337,8399,8681,23171,23175,26279,50487,81579,122618,255189	GPD1,PLA2G4A,PLD1,PLA2G10,JMJD7-PLA2G4B,GPD1L,LPIN1,PLA2G2D,PLA2G3,PLA2G12A,PLD4,PLA2G4F
5_Member	KEGG Pathway	hsa00591	Linoleic acid metabolism	-7.48491	-5.65632	7/29	5321,8399,8681,26279,50487,81579,255189	PLA2G4A,PLA2G10,JMJD7-PLA2G4B,PLA2G2D,PLA2G3,PLA2G12A,PLA2G4F
5_Member	KEGG Pathway	hsa04975	Fat digestion and absorption	-3.96838	-2.54253	5/41	8399,26279,50487,81579,84649	PLA2G10,PLA2G2D,PLA2G3,PLA2G12A,DGAT2
5_Member	KEGG Pathway	hsa04014	Ras signaling pathway	-3.47194	-2.09565	10/227	5321,5337,5567,8399,8681,26279,50487,51764,81579,255189	PLA2G4A,PLD1,PRKACB,PLA2G10,JMJD7-PLA2G4B,PLA2G2D,PLA2G3,GNG13,PLA2G12A,PLA2G4F
5_Member	KEGG Pathway	hsa05231	Choline metabolism in cancer	-2.98023	-1.63674	6/99	1978,5321,5337,8681,80736,255189	EIF4EBP1,PLA2G4A,PLD1,JMJD7-PLA2G4B,SLC44A4,PLA2G4F
6_Member	KEGG Pathway	hsa04911	Insulin secretion	-10.7415	-8.35663	13/85	107,108,111,112,115,1131,2740,3767,5567,6833,6844,11069,196883	ADCY1,ADCY2,ADCY5,ADCY6,ADCY9,CHRM3,GLP1R,KCNJ11,PRKACB,ABCC8,VAMP2,RAPGEF4,ADCY4
6_Member	KEGG Pathway	hsa04923	Regulation of lipolysis in adipocytes	-10.5903	-8.24679	11/54	107,108,111,112,115,2167,3991,5346,5567,57104,196883	ADCY1,ADCY2,ADCY5,ADCY6,ADCY9,FABP4,LIPE,PLIN1,PRKACB,PNPLA2,ADCY4
6_Member	KEGG Pathway	hsa04270	Vascular smooth muscle contraction	-9.84474	-7.63594	14/121	107,108,111,112,115,5321,5567,8399,8681,26279,50487,81579,196883,255189	ADCY1,ADCY2,ADCY5,ADCY6,ADCY9,PLA2G4A,PRKACB,PLA2G10,JMJD7-PLA2G4B,PLA2G2D,PLA2G3,PLA2G12A,ADCY4,PLA2G4F
6_Member	KEGG Pathway	hsa04913	Ovarian steroidogenesis	-9.59395	-7.46433	10/50	107,108,111,112,115,5321,5567,8681,196883,255189	ADCY1,ADCY2,ADCY5,ADCY6,ADCY9,PLA2G4A,PRKACB,JMJD7-PLA2G4B,ADCY4,PLA2G4F
6_Member	KEGG Pathway	hsa05032	Morphine addiction	-9.18681	-7.16639	12/91	107,108,111,112,115,5136,5138,5141,5150,5567,51764,196883	ADCY1,ADCY2,ADCY5,ADCY6,ADCY9,PDE1A,PDE2A,PDE4A,PDE7A,PRKACB,GNG13,ADCY4
6_Member	KEGG Pathway	hsa04724	Glutamatergic synapse	-9.10302	-7.13311	13/114	107,108,111,112,115,2752,5321,5337,5567,8681,51764,196883,255189	ADCY1,ADCY2,ADCY5,ADCY6,ADCY9,GLUL,PLA2G4A,PLD1,PRKACB,JMJD7-PLA2G4B,GNG13,ADCY4,PLA2G4F
6_Member	KEGG Pathway	hsa04972	Pancreatic secretion	-8.91248	-6.97475	12/96	107,108,111,112,115,952,1131,8399,26279,50487,81579,196883	ADCY1,ADCY2,ADCY5,ADCY6,ADCY9,CD38,CHRM3,PLA2G10,PLA2G2D,PLA2G3,PLA2G12A,ADCY4
6_Member	KEGG Pathway	hsa04727	GABAergic synapse	-8.21732	-6.30955	11/88	18,107,108,111,112,115,2571,2752,5567,51764,196883	ABAT,ADCY1,ADCY2,ADCY5,ADCY6,ADCY9,GAD1,GLUL,PRKACB,GNG13,ADCY4
6_Member	KEGG Pathway	hsa04912	GnRH signaling pathway	-8.00993	-6.13019	11/92	107,108,111,112,115,5321,5337,5567,8681,196883,255189	ADCY1,ADCY2,ADCY5,ADCY6,ADCY9,PLA2G4A,PLD1,PRKACB,JMJD7-PLA2G4B,ADCY4,PLA2G4F
6_Member	KEGG Pathway	hsa04918	Thyroid hormone synthesis	-7.85546	-5.98908	10/74	107,108,111,112,115,4036,5567,7173,196883,389434	ADCY1,ADCY2,ADCY5,ADCY6,ADCY9,LRP2,PRKACB,TPO,ADCY4,IYD
6_Member	KEGG Pathway	hsa04921	Oxytocin signaling pathway	-7.56937	-5.72855	13/152	107,108,111,112,115,783,952,5321,5563,5567,8681,196883,255189	ADCY1,ADCY2,ADCY5,ADCY6,ADCY9,CACNB2,CD38,PLA2G4A,PRKAA2,PRKACB,JMJD7-PLA2G4B,ADCY4,PLA2G4F
6_Member	KEGG Pathway	hsa04371	Apelin signaling pathway	-7.11096	-5.29427	12/138	107,108,111,112,115,3991,5346,5563,5567,10891,51764,196883	ADCY1,ADCY2,ADCY5,ADCY6,ADCY9,LIPE,PLIN1,PRKAA2,PRKACB,PPARGC1A,GNG13,ADCY4
6_Member	KEGG Pathway	hsa04211	Longevity regulating pathway	-7.07185	-5.26674	10/89	107,108,111,112,115,1978,5563,5567,10891,196883	ADCY1,ADCY2,ADCY5,ADCY6,ADCY9,EIF4EBP1,PRKAA2,PRKACB,PPARGC1A,ADCY4
6_Member	KEGG Pathway	hsa04024	cAMP signaling pathway	-7.06029	-5.26647	14/198	107,108,111,112,115,2740,3991,5141,5337,5465,5567,10411,11069,196883	ADCY1,ADCY2,ADCY5,ADCY6,ADCY9,GLP1R,LIPE,PDE4A,PLD1,PPARA,PRKACB,RAPGEF3,RAPGEF4,ADCY4
6_Member	KEGG Pathway	hsa04970	Salivary secretion	-7.02512	-5.24229	10/90	107,108,111,112,115,952,1131,5567,6844,196883	ADCY1,ADCY2,ADCY5,ADCY6,ADCY9,CD38,CHRM3,PRKACB,VAMP2,ADCY4
6_Member	KEGG Pathway	hsa04976	Bile secretion	-6.87919	-5.10708	9/71	107,108,111,112,115,5243,5567,9429,196883	ADCY1,ADCY2,ADCY5,ADCY6,ADCY9,ABCB1,PRKACB,ABCG2,ADCY4
6_Member	KEGG Pathway	hsa04072	Phospholipase D signaling pathway	-6.84089	-5.07924	12/146	107,108,111,112,115,5321,5337,8681,10411,11069,196883,255189	ADCY1,ADCY2,ADCY5,ADCY6,ADCY9,PLA2G4A,PLD1,JMJD7-PLA2G4B,RAPGEF3,RAPGEF4,ADCY4,PLA2G4F
6_Member	KEGG Pathway	hsa04750	Inflammatory mediator regulation of TRP channels	-6.71393	-4.96251	10/97	107,108,111,112,115,5321,5567,8681,196883,255189	ADCY1,ADCY2,ADCY5,ADCY6,ADCY9,PLA2G4A,PRKACB,JMJD7-PLA2G4B,ADCY4,PLA2G4F
6_Member	KEGG Pathway	hsa04925	Aldosterone synthesis and secretion	-6.33252	-4.59108	9/82	107,108,111,112,115,3991,5138,5567,196883	ADCY1,ADCY2,ADCY5,ADCY6,ADCY9,LIPE,PDE2A,PRKACB,ADCY4
6_Member	KEGG Pathway	hsa04213	Longevity regulating pathway - multiple species	-6.23647	-4.51434	8/62	107,108,111,112,115,5563,5567,196883	ADCY1,ADCY2,ADCY5,ADCY6,ADCY9,PRKAA2,PRKACB,ADCY4
6_Member	KEGG Pathway	hsa04020	Calcium signaling pathway	-5.81177	-4.16724	12/182	107,108,115,952,1131,3706,5136,5567,9630,84812,113026,196883	ADCY1,ADCY2,ADCY9,CD38,CHRM3,ITPKA,PDE1A,PRKACB,GNA14,PLCD4,PLCD3,ADCY4
6_Member	KEGG Pathway	hsa04611	Platelet activation	-5.75209	-4.11538	10/123	107,108,111,112,115,5321,5567,8681,196883,255189	ADCY1,ADCY2,ADCY5,ADCY6,ADCY9,PLA2G4A,PRKACB,JMJD7-PLA2G4B,ADCY4,PLA2G4F
6_Member	KEGG Pathway	hsa04971	Gastric acid secretion	-5.59487	-3.96585	8/75	107,108,111,112,115,1131,5567,196883	ADCY1,ADCY2,ADCY5,ADCY6,ADCY9,CHRM3,PRKACB,ADCY4
6_Member	KEGG Pathway	hsa04725	Cholinergic synapse	-5.19095	-3.59845	9/112	107,108,111,112,115,1131,5567,51764,196883	ADCY1,ADCY2,ADCY5,ADCY6,ADCY9,CHRM3,PRKACB,GNG13,ADCY4
6_Member	KEGG Pathway	hsa04261	Adrenergic signaling in cardiomyocytes	-5.13571	-3.56373	10/144	107,108,111,112,115,783,5567,10411,11069,196883	ADCY1,ADCY2,ADCY5,ADCY6,ADCY9,CACNB2,PRKACB,RAPGEF3,RAPGEF4,ADCY4
6_Member	KEGG Pathway	hsa05414	Dilated cardiomyopathy	-4.9977	-3.43236	8/90	107,108,111,112,115,783,5567,196883	ADCY1,ADCY2,ADCY5,ADCY6,ADCY9,CACNB2,PRKACB,ADCY4
6_Member	KEGG Pathway	hsa01522	Endocrine resistance	-4.79055	-3.28072	8/96	107,108,111,112,115,5469,5567,196883	ADCY1,ADCY2,ADCY5,ADCY6,ADCY9,MED1,PRKACB,ADCY4
6_Member	KEGG Pathway	hsa04713	Circadian entrainment	-4.79055	-3.28072	8/96	107,108,111,112,115,5567,51764,196883	ADCY1,ADCY2,ADCY5,ADCY6,ADCY9,PRKACB,GNG13,ADCY4
6_Member	KEGG Pathway	hsa04723	Retrograde endocannabinoid signaling	-4.62919	-3.13639	8/101	107,108,111,112,115,5567,51764,196883	ADCY1,ADCY2,ADCY5,ADCY6,ADCY9,PRKACB,GNG13,ADCY4
6_Member	KEGG Pathway	hsa04916	Melanogenesis	-4.62919	-3.13639	8/101	107,108,111,112,115,5443,5567,196883	ADCY1,ADCY2,ADCY5,ADCY6,ADCY9,POMC,PRKACB,ADCY4
6_Member	KEGG Pathway	hsa04022	cGMP-PKG signaling pathway	-3.9012	-2.48944	9/163	107,108,111,112,115,150,5138,8654,196883	ADCY1,ADCY2,ADCY5,ADCY6,ADCY9,ADRA2A,PDE2A,PDE5A,ADCY4
6_Member	KEGG Pathway	hsa04914	Progesterone-mediated oocyte maturation	-3.88918	-2.48201	7/96	107,108,111,112,115,5567,196883	ADCY1,ADCY2,ADCY5,ADCY6,ADCY9,PRKACB,ADCY4
6_Member	KEGG Pathway	hsa04915	Estrogen signaling pathway	-3.83299	-2.43037	7/98	107,108,111,112,115,5567,196883	ADCY1,ADCY2,ADCY5,ADCY6,ADCY9,PRKACB,ADCY4
6_Member	KEGG Pathway	hsa04742	Taste transduction	-3.38597	-2.01391	6/83	112,1131,5136,5567,51764,196883	ADCY6,CHRM3,PDE1A,PRKACB,GNG13,ADCY4
6_Member	KEGG Pathway	hsa04114	Oocyte meiosis	-3.20794	-1.84836	7/124	107,108,111,112,115,5567,196883	ADCY1,ADCY2,ADCY5,ADCY6,ADCY9,PRKACB,ADCY4
6_Member	KEGG Pathway	hsa04062	Chemokine signaling pathway	-2.87643	-1.54462	8/182	107,108,111,112,115,5567,51764,196883	ADCY1,ADCY2,ADCY5,ADCY6,ADCY9,PRKACB,GNG13,ADCY4
6_Member	KEGG Pathway	hsa04962	Vasopressin-regulated water reabsorption	-2.77832	-1.46161	4/44	112,115,5567,6844	ADCY6,ADCY9,PRKACB,VAMP2
6_Member	KEGG Pathway	hsa04015	Rap1 signaling pathway	-2.48987	-1.20535	8/210	107,108,111,112,115,10411,11069,196883	ADCY1,ADCY2,ADCY5,ADCY6,ADCY9,RAPGEF3,RAPGEF4,ADCY4
6_Member	KEGG Pathway	hsa04924	Renin secretion	-2.16265	-0.917636	4/65	111,112,5136,5567	ADCY5,ADCY6,PDE1A,PRKACB
7_Member	KEGG Pathway	hsa04540	Gap junction	-10.5441	-8.23836	13/88	107,108,111,112,115,5567,7277,10381,10382,84790,113457,196883,347733	ADCY1,ADCY2,ADCY5,ADCY6,ADCY9,PRKACB,TUBA4A,TUBB3,TUBB4A,TUBA1C,TUBA3D,ADCY4,TUBB2B
7_Member	KEGG Pathway	hsa05130	Pathogenic Escherichia coli infection	-4.3831	-2.92248	6/55	7277,10381,10382,84790,113457,347733	TUBA4A,TUBB3,TUBB4A,TUBA1C,TUBA3D,TUBB2B
7_Member	KEGG Pathway	hsa04145	Phagosome	-2.03263	-0.79075	6/154	7277,10381,10382,84790,113457,347733	TUBA4A,TUBB3,TUBB4A,TUBA1C,TUBA3D,TUBB2B
8_Member	KEGG Pathway	hsa01230	Biosynthesis of amino acids	-10.1973	-7.95858	12/75	445,586,2023,2752,5214,5723,6898,26227,29968,51166,84706,162417	ASS1,BCAT1,ENO1,GLUL,PFKP,PSPH,TAT,PHGDH,PSAT1,AADAT,GPT2,NAGS
8_Member	KEGG Pathway	hsa00250	Alanine, aspartate and glutamate metabolism	-8.27624	-6.35375	8/35	18,440,445,2571,2752,8528,84706,259307	ABAT,ASNS,ASS1,GAD1,GLUL,DDO,GPT2,IL4I1
8_Member	KEGG Pathway	hsa01210	2-Oxocarboxylic acid metabolism	-4.32263	-2.87223	4/18	586,51166,84706,162417	BCAT1,AADAT,GPT2,NAGS
8_Member	KEGG Pathway	hsa00220	Arginine biosynthesis	-4.04319	-2.61254	4/21	445,2752,84706,162417	ASS1,GLUL,GPT2,NAGS
9_Member	KEGG Pathway	hsa00280	Valine, leucine and isoleucine degradation	-9.78113	-7.60036	10/48	18,35,36,586,3158,3712,4329,56922,64087,259307	ABAT,ACADS,ACADSB,BCAT1,HMGCS2,IVD,ALDH6A1,MCCC1,MCCC2,IL4I1
9_Member	KEGG Pathway	M00036	Leucine degradation, leucine => acetoacetate + acetyl-CoA	-4.93418	-3.39438	4/13	586,3712,56922,64087	BCAT1,IVD,MCCC1,MCCC2
9_Member	KEGG Pathway	hsa_M00036	Leucine degradation, leucine => acetoacetate + acetyl-CoA	-4.93418	-3.39438	4/13	586,3712,56922,64087	BCAT1,IVD,MCCC1,MCCC2
10_Member	KEGG Pathway	hsa00260	Glycine, serine and threonine metabolism	-9.17809	-7.16639	9/40	1757,2593,4128,4129,5723,8639,26227,29968,55349	SARDH,GAMT,MAOA,MAOB,PSPH,AOC3,PHGDH,PSAT1,CHDH
10_Member	KEGG Pathway	M00020	Serine biosynthesis, glycerate-3P => serine	-5.81216	-4.16724	3/3	5723,26227,29968	PSPH,PHGDH,PSAT1
10_Member	KEGG Pathway	hsa_M00020	Serine biosynthesis, glycerate-3P => serine	-5.81216	-4.16724	3/3	5723,26227,29968	PSPH,PHGDH,PSAT1
11_Member	KEGG Pathway	hsa03320	PPAR signaling pathway	-9.17107	-7.16639	11/72	123,2167,2172,3158,4199,5346,5465,8309,9415,11001,376497	PLIN2,FABP4,FABP6,HMGCS2,ME1,PLIN1,PPARA,ACOX2,FADS2,SLC27A2,SLC27A1
12_Member	KEGG Pathway	hsa01200	Carbon metabolism	-9.10302	-7.13311	13/114	35,2023,2203,2539,3101,4199,4329,5214,5723,10873,26227,29968,84706	ACADS,ENO1,FBP1,G6PD,HK3,ME1,ALDH6A1,PFKP,PSPH,ME3,PHGDH,PSAT1,GPT2
12_Member	KEGG Pathway	hsa00052	Galactose metabolism	-5.87709	-4.19977	6/31	2717,3101,5214,8972,57016,92579	GLA,HK3,PFKP,MGAM,AKR1B10,G6PC3
12_Member	KEGG Pathway	hsa00010	Glycolysis / Gluconeogenesis	-4.90212	-3.36848	7/67	125,2023,2203,3101,3945,5214,92579	ADH1B,ENO1,FBP1,HK3,LDHB,PFKP,G6PC3
12_Member	KEGG Pathway	hsa00051	Fructose and mannose metabolism	-3.25579	-1.89209	4/33	2203,3101,5214,57016	FBP1,HK3,PFKP,AKR1B10
12_Member	KEGG Pathway	M00001	Glycolysis (Embden-Meyerhof pathway), glucose => pyruvate	-2.53249	-1.24451	3/25	2023,3101,5214	ENO1,HK3,PFKP
12_Member	KEGG Pathway	hsa_M00001	Glycolysis (Embden-Meyerhof pathway), glucose => pyruvate	-2.53249	-1.24451	3/25	2023,3101,5214	ENO1,HK3,PFKP
12_Member	KEGG Pathway	hsa00030	Pentose phosphate pathway	-2.3042	-1.04316	3/30	2203,2539,5214	FBP1,G6PD,PFKP
12_Member	KEGG Pathway	hsa05230	Central carbon metabolism in cancer	-2.16265	-0.917636	4/65	2539,3101,5163,5214	G6PD,HK3,PDK1,PFKP
13_Member	KEGG Pathway	hsa00910	Nitrogen metabolism	-7.59231	-5.7389	6/17	761,768,771,2752,23632,377677	CA3,CA9,CA12,GLUL,CA14,CA13
14_Member	KEGG Pathway	hsa04931	Insulin resistance	-6.31187	-4.58019	10/107	32,5465,5563,6720,10891,11001,51085,92579,133522,376497	ACACB,PPARA,PRKAA2,SREBF1,PPARGC1A,SLC27A2,MLXIPL,G6PC3,PPARGC1B,SLC27A1
14_Member	KEGG Pathway	hsa04152	AMPK signaling pathway	-5.85029	-4.1814	10/120	32,1978,2203,3952,3991,5214,5563,6720,10891,92579	ACACB,EIF4EBP1,FBP1,LEP,LIPE,PFKP,PRKAA2,SREBF1,PPARGC1A,G6PC3
14_Member	KEGG Pathway	hsa04922	Glucagon signaling pathway	-5.49186	-3.8704	9/103	32,108,2203,3945,5465,5563,5567,10891,92579	ACACB,ADCY2,FBP1,LDHB,PPARA,PRKAA2,PRKACB,PPARGC1A,G6PC3
14_Member	KEGG Pathway	hsa04910	Insulin signaling pathway	-5.3003	-3.68626	10/138	32,1978,2203,3101,3991,5563,5567,6720,10891,92579	ACACB,EIF4EBP1,FBP1,HK3,LIPE,PRKAA2,PRKACB,SREBF1,PPARGC1A,G6PC3
14_Member	KEGG Pathway	hsa04920	Adipocytokine signaling pathway	-4.81705	-3.28949	7/69	32,3952,5443,5465,5563,10891,92579	ACACB,LEP,POMC,PPARA,PRKAA2,PPARGC1A,G6PC3
15_Member	KEGG Pathway	hsa00650	Butanoate metabolism	-6.15541	-4.44262	6/28	18,35,2571,3158,6296,54988	ABAT,ACADS,GAD1,HMGCS2,ACSM3,ACSM5
15_Member	KEGG Pathway	hsa00410	beta-Alanine metabolism	-4.57177	-3.08997	5/31	18,2571,4329,8639,54498	ABAT,GAD1,ALDH6A1,AOC3,SMOX
16_Member	KEGG Pathway	hsa00270	Cysteine and methionine metabolism	-6.09021	-4.38656	7/45	262,586,1036,1789,3945,6898,259307	AMD1,BCAT1,CDO1,DNMT3B,LDHB,TAT,IL4I1
17_Member	KEGG Pathway	hsa00830	Retinol metabolism	-6.0755	-4.38081	8/65	125,7364,7366,7367,8228,8854,9227,157506	ADH1B,UGT2B7,UGT2B15,UGT2B17,PNPLA4,ALDH1A2,LRAT,RDH10
17_Member	KEGG Pathway	hsa00040	Pentose and glucuronate interconversions	-4.36989	-2.91442	5/34	7364,7366,7367,27294,57016	UGT2B7,UGT2B15,UGT2B17,DHDH,AKR1B10
17_Member	KEGG Pathway	hsa00140	Steroid hormone biosynthesis	-4.25077	-2.8054	6/58	1645,1646,6715,7364,7366,7367	AKR1C1,AKR1C2,SRD5A1,UGT2B7,UGT2B15,UGT2B17
17_Member	KEGG Pathway	hsa00860	Porphyrin and chlorophyll metabolism	-2.85425	-1.52626	4/42	1356,7364,7366,7367	CP,UGT2B7,UGT2B15,UGT2B17
17_Member	KEGG Pathway	hsa00983	Drug metabolism - other enzymes	-2.70624	-1.39704	4/46	9,7364,7366,7367	NAT1,UGT2B7,UGT2B15,UGT2B17
17_Member	KEGG Pathway	M00014	Glucuronate pathway (uronate pathway)	-2.4355	-1.16788	3/27	7364,7366,7367	UGT2B7,UGT2B15,UGT2B17
17_Member	KEGG Pathway	hsa00053	Ascorbate and aldarate metabolism	-2.4355	-1.16788	3/27	7364,7366,7367	UGT2B7,UGT2B15,UGT2B17
17_Member	KEGG Pathway	hsa_M00014	Glucuronate pathway (uronate pathway)	-2.4355	-1.16788	3/27	7364,7366,7367	UGT2B7,UGT2B15,UGT2B17
18_Member	KEGG Pathway	hsa00600	Sphingolipid metabolism	-5.95707	-4.27115	7/47	427,2717,7357,7368,79603,123099,340485	ASAH1,GLA,UGCG,UGT8,CERS4,DEGS2,ACER2
18_Member	KEGG Pathway	M00099	Sphingosine biosynthesis	-4.54033	-3.07102	4/16	427,79603,123099,340485	ASAH1,CERS4,DEGS2,ACER2
18_Member	KEGG Pathway	hsa_M00099	Sphingosine biosynthesis	-4.54033	-3.07102	4/16	427,79603,123099,340485	ASAH1,CERS4,DEGS2,ACER2
19_Member	KEGG Pathway	hsa00430	Taurine and hypotaurine metabolism	-5.26201	-3.6612	4/11	1036,2571,2678,51380	CDO1,GAD1,GGT1,CSAD
20_Member	KEGG Pathway	hsa04146	Peroxisome	-5.26076	-3.6612	8/83	215,2053,3295,8309,8528,8800,11001,83594	ABCD1,EPHX2,HSD17B4,ACOX2,DDO,PEX11A,SLC27A2,NUDT12

## Sheet: COAD-TP53
Table 11-5 The KEGG annotations are filtered by Entities pVal < 0.05 in COAD with TP53 mutation.
GroupID	Category	Term	Description	LogP	Log(q-value)	InTerm_InList	Genes	Symbols
1_Member	KEGG Pathway	hsa00982	Drug metabolism - cytochrome P450	-6.94072	-3.55583	4/70	130,218,4129,7366	ADH6,ALDH3A1,MAOB,UGT2B15
1_Member	KEGG Pathway	hsa00350	Tyrosine metabolism	-5.81233	-2.72847	3/35	130,218,4129	ADH6,ALDH3A1,MAOB
1_Member	KEGG Pathway	hsa00980	Metabolism of xenobiotics by cytochrome P450	-4.82335	-2.04051	3/74	130,218,7366	ADH6,ALDH3A1,UGT2B15
1_Member	KEGG Pathway	hsa05204	Chemical carcinogenesis	-4.68925	-2.00333	3/82	130,218,7366	ADH6,ALDH3A1,UGT2B15
2_Member	KEGG Pathway	hsa00010	Glycolysis / Gluconeogenesis	-4.95347	-2.0457	3/67	130,218,2026	ADH6,ALDH3A1,ENO2

## Sheet: HNSC-TP53
Table 11-6 The KEGG annotations are filtered by Entities pVal < 0.05 in HNSC with TP53 mutation.
GroupID	Category	Term	Description	LogP	Log(q-value)	InTerm_InList	Genes	Symbols
1_Member	KEGG Pathway	hsa00330	Arginine and proline metabolism	-8.46376	-5.07886	7/50	2628,4842,4843,4953,5625,54498,283208	GATM,NOS1,NOS2,ODC1,PRODH,SMOX,P4HA3
1_Member	KEGG Pathway	hsa00220	Arginine biosynthesis	-3.9042	-1.79806	3/21	445,4842,4843	ASS1,NOS1,NOS2
1_Member	KEGG Pathway	hsa04020	Calcium signaling pathway	-2.77635	-1.01471	5/182	1131,3706,4842,4843,23236	CHRM3,ITPKA,NOS1,NOS2,PLCB1
2_Member	KEGG Pathway	hsa00564	Glycerophospholipid metabolism	-7.81049	-4.72663	8/95	1608,8613,9468,23171,26279,56994,79888,150763	DGKG,PLPP3,PCYT1B,GPD1L,PLA2G2D,CHPT1,LPCAT1,GPAT2
2_Member	KEGG Pathway	hsa05231	Choline metabolism in cancer	-5.14185	-2.36294	6/99	1608,6581,8503,8613,9468,56994	DGKG,SLC22A3,PIK3R3,PLPP3,PCYT1B,CHPT1
2_Member	KEGG Pathway	hsa00565	Ether lipid metabolism	-4.23399	-1.95085	4/45	8613,26279,56994,79888	PLPP3,PLA2G2D,CHPT1,LPCAT1
2_Member	KEGG Pathway	hsa00561	Glycerolipid metabolism	-3.7709	-1.70823	4/59	1608,8613,80339,150763	DGKG,PLPP3,PNPLA3,GPAT2
3_Member	KEGG Pathway	hsa04371	Apelin signaling pathway	-5.40041	-2.49264	7/138	112,2792,3991,4842,4843,23236,94235	ADCY6,GNGT1,LIPE,NOS1,NOS2,PLCB1,GNG8
3_Member	KEGG Pathway	hsa04725	Cholinergic synapse	-4.83382	-2.29403	6/112	112,1131,2792,8503,23236,94235	ADCY6,CHRM3,GNGT1,PIK3R3,PLCB1,GNG8
3_Member	KEGG Pathway	hsa04713	Circadian entrainment	-4.04927	-1.84712	5/96	112,2792,4842,23236,94235	ADCY6,GNGT1,NOS1,PLCB1,GNG8
3_Member	KEGG Pathway	hsa04923	Regulation of lipolysis in adipocytes	-3.92119	-1.79806	4/54	112,3991,5742,8503	ADCY6,LIPE,PTGS1,PIK3R3
3_Member	KEGG Pathway	hsa04925	Aldosterone synthesis and secretion	-3.22207	-1.33016	4/82	112,3991,6770,23236	ADCY6,LIPE,STAR,PLCB1
3_Member	KEGG Pathway	hsa04072	Phospholipase D signaling pathway	-3.2033	-1.33016	5/146	112,1608,8503,8613,23236	ADCY6,DGKG,PIK3R3,PLPP3,PLCB1
3_Member	KEGG Pathway	hsa04911	Insulin secretion	-3.16316	-1.30975	4/85	112,1131,3767,23236	ADCY6,CHRM3,KCNJ11,PLCB1
3_Member	KEGG Pathway	hsa04540	Gap junction	-3.1065	-1.27791	4/88	112,10381,10382,23236	ADCY6,TUBB3,TUBB4A,PLCB1
3_Member	KEGG Pathway	hsa04727	GABAergic synapse	-3.1065	-1.27791	4/88	112,2571,2792,94235	ADCY6,GAD1,GNGT1,GNG8
3_Member	KEGG Pathway	hsa04970	Salivary secretion	-3.06989	-1.25627	4/90	112,1131,4842,23236	ADCY6,CHRM3,NOS1,PLCB1
3_Member	KEGG Pathway	hsa04972	Pancreatic secretion	-2.96524	-1.17142	4/96	112,1131,23236,26279	ADCY6,CHRM3,PLCB1,PLA2G2D
3_Member	KEGG Pathway	hsa04723	Retrograde endocannabinoid signaling	-2.88343	-1.1006	4/101	112,2792,23236,94235	ADCY6,GNGT1,PLCB1,GNG8
3_Member	KEGG Pathway	hsa04062	Chemokine signaling pathway	-2.77635	-1.01471	5/182	112,2792,8503,23236,94235	ADCY6,GNGT1,PIK3R3,PLCB1,GNG8
3_Member	KEGG Pathway	hsa04726	Serotonergic synapse	-2.70421	-0.952787	4/113	2792,5742,23236,94235	GNGT1,PTGS1,PLCB1,GNG8
3_Member	KEGG Pathway	hsa04724	Glutamatergic synapse	-2.69025	-0.948809	4/114	112,2792,23236,94235	ADCY6,GNGT1,PLCB1,GNG8
3_Member	KEGG Pathway	hsa04270	Vascular smooth muscle contraction	-2.59622	-0.864539	4/121	112,4882,23236,26279	ADCY6,NPR2,PLCB1,PLA2G2D
3_Member	KEGG Pathway	hsa05200	Pathways in cancer	-2.58541	-0.863272	7/395	112,2792,4843,7157,8503,23236,94235	ADCY6,GNGT1,NOS2,TP53,PIK3R3,PLCB1,GNG8
3_Member	KEGG Pathway	hsa04611	Platelet activation	-2.57048	-0.857684	4/123	112,5742,8503,23236	ADCY6,PTGS1,PIK3R3,PLCB1
3_Member	KEGG Pathway	hsa04918	Thyroid hormone synthesis	-2.29438	-0.617059	3/74	112,2877,23236	ADCY6,GPX2,PLCB1
3_Member	KEGG Pathway	hsa04971	Gastric acid secretion	-2.27812	-0.609228	3/75	112,1131,23236	ADCY6,CHRM3,PLCB1
3_Member	KEGG Pathway	hsa05032	Morphine addiction	-2.04645	-0.432409	3/91	112,2792,94235	ADCY6,GNGT1,GNG8
4_Member	KEGG Pathway	hsa00240	Pyrimidine metabolism	-5.01841	-2.36294	6/104	978,5422,5426,5557,7298,56953	CDA,POLA1,POLE,PRIM1,TYMS,NT5M
4_Member	KEGG Pathway	hsa00230	Purine metabolism	-4.74156	-2.25976	7/174	112,4882,5158,5422,5426,5557,56953	ADCY6,NPR2,PDE6B,POLA1,POLE,PRIM1,NT5M
4_Member	CORUM	CORUM:1108	DNA synthesome complex (15 subunits)	-4.36115	-1.97626	3/15	5422,5426,5557	POLA1,POLE,PRIM1
4_Member	CORUM	CORUM:1099	DNA synthesome complex (17 subunits)	-4.18962	-1.95085	3/17	5422,5426,5557	POLA1,POLE,PRIM1
4_Member	CORUM	CORUM:1111	DNA synthesome complex (17 subunits)	-4.18962	-1.95085	3/17	5422,5426,5557	POLA1,POLE,PRIM1
4_Member	KEGG Pathway	hsa03030	DNA replication	-3.19653	-1.33016	3/36	5422,5426,5557	POLA1,POLE,PRIM1
5_Member	KEGG Pathway	hsa00590	Arachidonic acid metabolism	-4.96968	-2.36294	5/62	2053,2877,5730,5742,26279	EPHX2,GPX2,PTGDS,PTGS1,PLA2G2D
6_Member	KEGG Pathway	hsa00380	Tryptophan metabolism	-4.43845	-2.0078	4/40	3620,23498,55753,259307	IDO1,HAAO,OGDHL,IL4I1
7_Member	KEGG Pathway	hsa05418	Fluid shear stress and atherosclerosis	-4.25203	-1.95085	6/142	445,857,2946,6383,7157,8503	ASS1,CAV1,GSTM2,SDC2,TP53,PIK3R3
7_Member	KEGG Pathway	hsa05205	Proteoglycans in cancer	-3.40667	-1.43675	6/203	857,1634,4060,6383,7157,8503	CAV1,DCN,LUM,SDC2,TP53,PIK3R3
7_Member	KEGG Pathway	hsa01524	Platinum drug resistance	-2.31089	-0.617059	3/73	2946,7157,8503	GSTM2,TP53,PIK3R3
7_Member	KEGG Pathway	hsa05222	Small cell lung cancer	-2.14173	-0.512711	3/84	4843,7157,8503	NOS2,TP53,PIK3R3
7_Member	KEGG Pathway	hsa04211	Longevity regulating pathway	-2.07281	-0.451348	3/89	112,7157,8503	ADCY6,TP53,PIK3R3
8_Member	KEGG Pathway	hsa04070	Phosphatidylinositol signaling system	-4.02789	-1.84712	5/97	1608,3628,3706,8503,23236	DGKG,INPP1,ITPKA,PIK3R3,PLCB1
8_Member	KEGG Pathway	hsa00562	Inositol phosphate metabolism	-3.46024	-1.47329	4/71	3628,3706,23236,51477	INPP1,ITPKA,PLCB1,ISYNA1
9_Member	KEGG Pathway	hsa00480	Glutathione metabolism	-3.92119	-1.79806	4/54	2877,2946,4953,124975	GPX2,GSTM2,ODC1,GGT6
10_Member	KEGG Pathway	hsa00140	Steroid hormone biosynthesis	-3.79983	-1.71597	4/58	1645,1646,6783,54577	AKR1C1,AKR1C2,SULT1E1,UGT1A7
10_Member	KEGG Pathway	hsa00982	Drug metabolism - cytochrome P450	-3.48386	-1.47919	4/70	2326,2328,2946,54577	FMO1,FMO3,GSTM2,UGT1A7
10_Member	KEGG Pathway	hsa00980	Metabolism of xenobiotics by cytochrome P450	-2.29438	-0.617059	3/74	1645,2946,54577	AKR1C1,GSTM2,UGT1A7
10_Member	KEGG Pathway	hsa05204	Chemical carcinogenesis	-2.17059	-0.518089	3/82	1646,2946,54577	AKR1C2,GSTM2,UGT1A7
11_Member	KEGG Pathway	M00056	O-glycan biosynthesis, mucin type core	-3.57081	-1.54764	3/27	11226,64409,117248	GALNT6,GALNT17,GALNT15
11_Member	KEGG Pathway	hsa_M00056	O-glycan biosynthesis, mucin type core	-3.57081	-1.54764	3/27	11226,64409,117248	GALNT6,GALNT17,GALNT15
11_Member	KEGG Pathway	hsa00512	Mucin type O-glycan biosynthesis	-3.39012	-1.43659	3/31	11226,64409,117248	GALNT6,GALNT17,GALNT15
12_Member	KEGG Pathway	hsa01230	Biosynthesis of amino acids	-3.36924	-1.4315	4/75	445,586,5091,26227	ASS1,BCAT1,PC,PHGDH
13_Member	KEGG Pathway	hsa04550	Signaling pathways regulating pluripotency of stem cells	-3.3003	-1.3778	5/139	3624,3625,3670,5080,8503	INHBA,INHBB,ISL1,PAX6,PIK3R3
13_Member	KEGG Pathway	hsa04350	TGF-beta signaling pathway	-2.14173	-0.512711	3/84	1634,3624,3625	DCN,INHBA,INHBB
14_Member	KEGG Pathway	hsa00250	Alanine, aspartate and glutamate metabolism	-3.23285	-1.33016	3/35	445,2571,259307	ASS1,GAD1,IL4I1
15_Member	KEGG Pathway	hsa00260	Glycine, serine and threonine metabolism	-3.06138	-1.25627	3/40	2628,26227,55349	GATM,PHGDH,CHDH
16_Member	KEGG Pathway	hsa04910	Insulin signaling pathway	-2.39143	-0.687776	4/138	32,3991,5577,8503	ACACB,LIPE,PRKAR2B,PIK3R3
17_Member	KEGG Pathway	hsa04145	Phagosome	-2.22355	-0.562933	4/154	4842,10381,10382,23480	NOS1,TUBB3,TUBB4A,SEC61G
18_Member	KEGG Pathway	hsa04146	Peroxisome	-2.15606	-0.512711	3/83	2053,4843,26061	EPHX2,NOS2,HACL1

## Sheet: LIHC-TP53
Table 11-7 The KEGG annotations are filtered by Entities pVal < 0.05 in LIHC with TP53 mutation.
GroupID	Category	Term	Description	LogP	Log(q-value)	InTerm_InList	Genes	Symbols
1_Member	KEGG Pathway	hsa00240	Pyrimidine metabolism	-13.5155	-10.1307	13/104	1841,5422,5424,5427,5557,5558,6241,7083,7296,7298,7378,23649,56655	DTYMK,POLA1,POLD1,POLE2,PRIM1,PRIM2,RRM2,TK1,TXNRD1,TYMS,UPP1,POLA2,POLE4
1_Member	CORUM	CORUM:1108	DNA synthesome complex (15 subunits)	-11.9766	-8.93092	7/15	5422,5424,5427,5557,5558,23649,56655	POLA1,POLD1,POLE2,PRIM1,PRIM2,POLA2,POLE4
1_Member	KEGG Pathway	hsa00230	Purine metabolism	-11.8387	-8.93092	14/174	954,3614,3704,5138,5315,5422,5424,5427,5557,5558,6241,23649,50940,56655	ENTPD2,IMPDH1,ITPA,PDE2A,PKM,POLA1,POLD1,POLE2,PRIM1,PRIM2,RRM2,POLA2,PDE11A,POLE4
1_Member	CORUM	CORUM:1099	DNA synthesome complex (17 subunits)	-11.5005	-8.81453	7/17	5422,5424,5427,5557,5558,23649,56655	POLA1,POLD1,POLE2,PRIM1,PRIM2,POLA2,POLE4
1_Member	CORUM	CORUM:1111	DNA synthesome complex (17 subunits)	-11.5005	-8.81453	7/17	5422,5424,5427,5557,5558,23649,56655	POLA1,POLD1,POLE2,PRIM1,PRIM2,POLA2,POLE4
1_Member	CORUM	CORUM:1100	DNA polymerase alpha-primase complex	-8.99145	-6.5608	4/4	5422,5557,5558,23649	POLA1,PRIM1,PRIM2,POLA2
1_Member	KEGG Pathway	hsa03030	DNA replication	-8.907	-6.5221	7/36	5422,5424,5427,5557,5558,23649,56655	POLA1,POLD1,POLE2,PRIM1,PRIM2,POLA2,POLE4
1_Member	CORUM	CORUM:1107	DNA synthesome core complex	-8.85586	-6.51237	5/10	5422,5424,5557,5558,23649	POLA1,POLD1,PRIM1,PRIM2,POLA2
1_Member	CORUM	CORUM:1098	DNA synthesome complex (13 subunits)	-8.15368	-5.91491	5/13	5422,5424,5557,5558,23649	POLA1,POLD1,PRIM1,PRIM2,POLA2
1_Member	KEGG Pathway	hsa03410	Base excision repair	-3.05649	-1.41196	3/33	5424,5427,56655	POLD1,POLE2,POLE4
1_Member	KEGG Pathway	hsa03420	Nucleotide excision repair	-2.60875	-1.00201	3/47	5424,5427,56655	POLD1,POLE2,POLE4
2_Member	KEGG Pathway	hsa00980	Metabolism of xenobiotics by cytochrome P450	-10.8533	-8.24661	10/74	125,127,130,874,1645,2947,3290,10941,27294,54578	ADH1B,ADH4,ADH6,CBR3,AKR1C1,GSTM3,HSD11B1,UGT2A1,DHDH,UGT1A6
2_Member	KEGG Pathway	hsa05204	Chemical carcinogenesis	-7.63635	-5.46304	8/82	10,125,127,130,2947,3290,10941,54578	NAT2,ADH1B,ADH4,ADH6,GSTM3,HSD11B1,UGT2A1,UGT1A6
2_Member	KEGG Pathway	hsa00350	Tyrosine metabolism	-7.35508	-5.27122	6/35	125,127,130,3242,6898,259307	ADH1B,ADH4,ADH6,HPD,TAT,IL4I1
2_Member	KEGG Pathway	hsa00830	Retinol metabolism	-5.70948	-3.7048	6/65	125,127,130,5959,10941,54578	ADH1B,ADH4,ADH6,RDH5,UGT2A1,UGT1A6
2_Member	KEGG Pathway	hsa00982	Drug metabolism - cytochrome P450	-5.51895	-3.532	6/70	125,127,130,2947,10941,54578	ADH1B,ADH4,ADH6,GSTM3,UGT2A1,UGT1A6
2_Member	KEGG Pathway	hsa00071	Fatty acid degradation	-3.93575	-2.19038	4/44	125,127,130,23305	ADH1B,ADH4,ADH6,ACSL6
3_Member	KEGG Pathway	hsa01200	Carbon metabolism	-10.2588	-7.719	11/114	2023,2539,3101,4199,5226,5315,6888,7086,26227,84706,283871	ENO1,G6PD,HK3,ME1,PGD,PKM,TALDO1,TKT,PHGDH,GPT2,PGP
3_Member	KEGG Pathway	hsa01230	Biosynthesis of amino acids	-9.34232	-6.86052	9/75	586,2023,5315,5831,6888,6898,7086,26227,84706	BCAT1,ENO1,PKM,PYCR1,TALDO1,TAT,TKT,PHGDH,GPT2
3_Member	KEGG Pathway	M00004	Pentose phosphate pathway (Pentose phosphate cycle)	-6.31229	-4.28913	4/12	2539,5226,6888,7086	G6PD,PGD,TALDO1,TKT
3_Member	KEGG Pathway	hsa_M00004	Pentose phosphate pathway (Pentose phosphate cycle)	-6.31229	-4.28913	4/12	2539,5226,6888,7086	G6PD,PGD,TALDO1,TKT
3_Member	KEGG Pathway	hsa00030	Pentose phosphate pathway	-4.60375	-2.69598	4/30	2539,5226,6888,7086	G6PD,PGD,TALDO1,TKT
4_Member	KEGG Pathway	hsa00010	Glycolysis / Gluconeogenesis	-8.3427	-6.03699	8/67	125,127,130,2023,2538,3101,5105,5315	ADH1B,ADH4,ADH6,ENO1,G6PC,HK3,PCK1,PKM
4_Member	KEGG Pathway	hsa05230	Central carbon metabolism in cancer	-4.44982	-2.63313	5/65	2539,3101,5315,6513,9123	G6PD,HK3,PKM,SLC2A1,SLC16A3
4_Member	KEGG Pathway	M00001	Glycolysis (Embden-Meyerhof pathway), glucose => pyruvate	-3.41713	-1.73121	3/25	2023,3101,5315	ENO1,HK3,PKM
4_Member	KEGG Pathway	hsa_M00001	Glycolysis (Embden-Meyerhof pathway), glucose => pyruvate	-3.41713	-1.73121	3/25	2023,3101,5315	ENO1,HK3,PKM
4_Member	KEGG Pathway	hsa04066	HIF-1 signaling pathway	-2.56646	-0.973958	4/101	1978,2023,3101,6513	EIF4EBP1,ENO1,HK3,SLC2A1
5_Member	KEGG Pathway	hsa00270	Cysteine and methionine metabolism	-8.19027	-5.91933	7/45	586,1786,1789,6611,6723,6898,259307	BCAT1,DNMT1,DNMT3B,SMS,SRM,TAT,IL4I1
5_Member	KEGG Pathway	hsa00330	Arginine and proline metabolism	-5.0109	-3.07317	5/50	5831,6611,6723,54498,84735	PYCR1,SMS,SRM,SMOX,CNDP1
5_Member	KEGG Pathway	hsa00410	beta-Alanine metabolism	-4.54568	-2.69511	4/31	6611,6723,54498,84735	SMS,SRM,SMOX,CNDP1
6_Member	KEGG Pathway	hsa00983	Drug metabolism - other enzymes	-8.12064	-5.91184	7/46	10,3614,3704,7083,7378,10941,54578	NAT2,IMPDH1,ITPA,TK1,UPP1,UGT2A1,UGT1A6
6_Member	KEGG Pathway	hsa00040	Pentose and glucuronate interconversions	-7.43471	-5.30509	6/34	231,7358,10941,27294,54578,57016	AKR1B1,UGDH,UGT2A1,DHDH,UGT1A6,AKR1B10
6_Member	KEGG Pathway	hsa00140	Steroid hormone biosynthesis	-7.39585	-5.28972	7/58	1645,3283,3290,6716,8644,10941,54578	AKR1C1,HSD3B1,HSD11B1,SRD5A2,AKR1C3,UGT2A1,UGT1A6
6_Member	KEGG Pathway	M00014	Glucuronate pathway (uronate pathway)	-3.31636	-1.65575	3/27	7358,10941,54578	UGDH,UGT2A1,UGT1A6
6_Member	KEGG Pathway	hsa00053	Ascorbate and aldarate metabolism	-3.31636	-1.65575	3/27	7358,10941,54578	UGDH,UGT2A1,UGT1A6
6_Member	KEGG Pathway	hsa_M00014	Glucuronate pathway (uronate pathway)	-3.31636	-1.65575	3/27	7358,10941,54578	UGDH,UGT2A1,UGT1A6
7_Member	KEGG Pathway	hsa00480	Glutathione metabolism	-7.61748	-5.46304	7/54	2539,2687,2947,5226,6241,6611,6723	G6PD,GGT5,GSTM3,PGD,RRM2,SMS,SRM
8_Member	KEGG Pathway	hsa03320	PPAR signaling pathway	-6.73458	-4.6719	7/72	2172,4199,5105,5346,10998,23305,116519	FABP6,ME1,PCK1,PLIN1,SLC27A5,ACSL6,APOA5
8_Member	KEGG Pathway	hsa00620	Pyruvate metabolism	-4.14375	-2.36092	4/39	97,4199,5105,5315	ACYP1,ME1,PCK1,PKM
9_Member	CORUM	CORUM:3118	SMN1-SIP1-SNRP complex	-5.44327	-3.47335	3/6	6628,6633,8487	SNRPB,SNRPD2,GEMIN2
9_Member	CORUM	CORUM:1142	SMN complex	-4.82549	-2.903	3/9	6628,6633,8487	SNRPB,SNRPD2,GEMIN2
9_Member	CORUM	CORUM:1143	SMN complex	-4.10268	-2.34104	3/15	6628,6633,8487	SNRPB,SNRPD2,GEMIN2
9_Member	CORUM	CORUM:1745	SMN complex	-4.10268	-2.34104	3/15	6628,6633,8487	SNRPB,SNRPD2,GEMIN2
10_Member	KEGG Pathway	hsa03013	RNA transport	-5.18687	-3.23334	8/171	1978,8487,8662,9688,23225,23511,57122,348995	EIF4EBP1,GEMIN2,EIF3B,NUP93,NUP210,NUP188,NUP107,NUP43
11_Member	KEGG Pathway	hsa00590	Arachidonic acid metabolism	-4.54986	-2.69511	5/62	874,2687,5742,8644,9536	CBR3,GGT5,PTGS1,AKR1C3,PTGES
12_Member	KEGG Pathway	hsa04922	Glucagon signaling pathway	-4.54827	-2.69511	6/103	2538,5105,5315,6513,10891,23236	G6PC,PCK1,PKM,SLC2A1,PPARGC1A,PLCB1
12_Member	KEGG Pathway	hsa04931	Insulin resistance	-4.45465	-2.63313	6/107	2538,5105,6513,10891,10998,57761	G6PC,PCK1,SLC2A1,PPARGC1A,SLC27A5,TRIB3
12_Member	KEGG Pathway	hsa04920	Adipocytokine signaling pathway	-4.32402	-2.5302	5/69	2538,5105,6513,10891,23305	G6PC,PCK1,SLC2A1,PPARGC1A,ACSL6
12_Member	KEGG Pathway	hsa04152	AMPK signaling pathway	-3.19561	-1.54311	5/120	1978,2538,5105,5210,10891	EIF4EBP1,G6PC,PCK1,PFKFB4,PPARGC1A
12_Member	KEGG Pathway	hsa04910	Insulin signaling pathway	-2.92277	-1.30131	5/138	1978,2538,3101,5105,10891	EIF4EBP1,G6PC,HK3,PCK1,PPARGC1A
13_Member	KEGG Pathway	hsa00052	Galactose metabolism	-4.54568	-2.69511	4/31	231,2538,3101,57016	AKR1B1,G6PC,HK3,AKR1B10
13_Member	KEGG Pathway	hsa00051	Fructose and mannose metabolism	-4.43542	-2.63031	4/33	231,3101,5210,57016	AKR1B1,HK3,PFKFB4,AKR1B10
13_Member	KEGG Pathway	hsa00561	Glycerolipid metabolism	-3.43913	-1.73548	4/59	231,56895,57016,150763	AKR1B1,AGPAT4,AKR1B10,GPAT2
14_Member	KEGG Pathway	hsa00130	Ubiquinone and other terpenoid-quinone biosynthesis	-4.53593	-2.69511	3/11	1728,3242,6898	NQO1,HPD,TAT
14_Member	KEGG Pathway	hsa00360	Phenylalanine metabolism	-3.93182	-2.19038	3/17	3242,6898,259307	HPD,TAT,IL4I1
15_Member	KEGG Pathway	hsa04540	Gap junction	-3.81939	-2.08771	5/88	7278,10376,23236,84790,347733	TUBA3C,TUBA1B,PLCB1,TUBA1C,TUBB2B
15_Member	KEGG Pathway	hsa05130	Pathogenic Escherichia coli infection	-3.55677	-1.84398	4/55	7278,10376,84790,347733	TUBA3C,TUBA1B,TUBA1C,TUBB2B
16_Member	KEGG Pathway	hsa00564	Glycerophospholipid metabolism	-3.66328	-1.94115	5/95	2820,23171,54947,56895,150763	GPD2,GPD1L,LPCAT2,AGPAT4,GPAT2
17_Member	KEGG Pathway	hsa00250	Alanine, aspartate and glutamate metabolism	-2.98107	-1.34437	3/35	440,84706,259307	ASNS,GPT2,IL4I1
17_Member	KEGG Pathway	hsa00380	Tryptophan metabolism	-2.81127	-1.19723	3/40	8564,11185,259307	KMO,INMT,IL4I1
18_Member	KEGG Pathway	hsa00500	Starch and sucrose metabolism	-2.9451	-1.31608	3/36	2538,3101,11181	G6PC,HK3,TREH
18_Member	KEGG Pathway	hsa00520	Amino sugar and nucleotide sugar metabolism	-2.58253	-0.982967	3/48	3101,7358,10007	HK3,UGDH,GNPDA1
19_Member	KEGG Pathway	hsa04976	Bile secretion	-2.10478	-0.519229	3/71	6513,10998,28234	SLC2A1,SLC27A5,SLCO1B3
20_Member	KEGG Pathway	hsa04371	Apelin signaling pathway	-2.0873	-0.508593	4/138	5346,8877,10891,23236	PLIN1,SPHK1,PPARGC1A,PLCB1

## Sheet: LUAD-TP53
Table 11-8 The KEGG annotations are filtered by Entities pVal < 0.05 in LUAD with TP53 mutation.
GroupID	Category	Term	Description	LogP	Log(q-value)	InTerm_InList	Genes	Symbols
1_Member	KEGG Pathway	hsa00230	Purine metabolism	-9.27296	-5.88807	9/174	203,205,5143,5144,5427,5557,5558,6241,171568	AK1,AK4,PDE4C,PDE4D,POLE2,PRIM1,PRIM2,RRM2,POLR3H
1_Member	KEGG Pathway	hsa00240	Pyrimidine metabolism	-8.09379	-5.0318	7/104	5427,5557,5558,6241,7083,7298,171568	POLE2,PRIM1,PRIM2,RRM2,TK1,TYMS,POLR3H
1_Member	CORUM	CORUM:1108	DNA synthesome complex (15 subunits)	-5.16601	-2.62622	3/15	5427,5557,5558	POLE2,PRIM1,PRIM2
1_Member	CORUM	CORUM:1099	DNA synthesome complex (17 subunits)	-4.99308	-2.56243	3/17	5427,5557,5558	POLE2,PRIM1,PRIM2
1_Member	CORUM	CORUM:1111	DNA synthesome complex (17 subunits)	-4.99308	-2.56243	3/17	5427,5557,5558	POLE2,PRIM1,PRIM2
1_Member	KEGG Pathway	hsa03030	DNA replication	-3.98674	-1.64324	3/36	5427,5557,5558	POLE2,PRIM1,PRIM2
2_Member	KEGG Pathway	M00020	Serine biosynthesis, glycerate-3P => serine	-7.81463	-5.0318	3/3	5723,26227,29968	PSPH,PHGDH,PSAT1
2_Member	KEGG Pathway	hsa_M00020	Serine biosynthesis, glycerate-3P => serine	-7.81463	-5.0318	3/3	5723,26227,29968	PSPH,PHGDH,PSAT1
2_Member	KEGG Pathway	hsa00260	Glycine, serine and threonine metabolism	-7.27238	-4.58646	5/40	314,1491,5723,26227,29968	AOC2,CTH,PSPH,PHGDH,PSAT1
2_Member	KEGG Pathway	hsa01230	Biosynthesis of amino acids	-5.88295	-3.27621	5/75	230,1491,5723,26227,29968	ALDOC,CTH,PSPH,PHGDH,PSAT1
2_Member	KEGG Pathway	hsa01200	Carbon metabolism	-3.69991	-1.3942	4/114	230,5723,26227,29968	ALDOC,PSPH,PHGDH,PSAT1
3_Member	KEGG Pathway	hsa00590	Arachidonic acid metabolism	-4.73519	-2.3503	4/62	247,873,5321,8399	ALOX15B,CBR1,PLA2G4A,PLA2G10
4_Member	KEGG Pathway	hsa00480	Glutathione metabolism	-3.45995	-1.18901	3/54	2947,4953,6241	GSTM3,ODC1,RRM2
5_Member	KEGG Pathway	hsa05231	Choline metabolism in cancer	-2.69399	-0.45523	3/99	1978,5321,6581	EIF4EBP1,PLA2G4A,SLC22A3
6_Member	KEGG Pathway	hsa03013	RNA transport	-2.03198	0	3/171	1978,8487,9631	EIF4EBP1,GEMIN2,NUP155

## Sheet: STAD-TP53
Table 11-9 The KEGG annotations are filtered by Entities pVal < 0.05 in STAD with TP53 mutation.
GroupID	Category	Term	Description	LogP	Log(q-value)	InTerm_InList	Genes	Symbols
1_Member	KEGG Pathway	hsa00230	Purine metabolism	-7.99984	-4.61494	8/174	2982,2984,5137,5139,5144,5313,8654,27115	GUCY1A1,GUCY2C,PDE1C,PDE3A,PDE4D,PKLR,PDE5A,PDE7B
1_Member	KEGG Pathway	hsa04924	Renin secretion	-3.26527	-1.05647	3/65	2982,5137,5139	GUCY1A1,PDE1C,PDE3A
1_Member	KEGG Pathway	hsa04022	cGMP-PKG signaling pathway	-2.12855	-0.0860786	3/163	2982,5139,8654	GUCY1A1,PDE3A,PDE5A
2_Member	KEGG Pathway	hsa05032	Morphine addiction	-7.03233	-3.94847	6/91	2786,2788,5137,5139,5144,27115	GNG4,GNG7,PDE1C,PDE3A,PDE4D,PDE7B
2_Member	KEGG Pathway	hsa04014	Ras signaling pathway	-3.63389	-1.36294	5/227	2786,2788,11145,26279,255189	GNG4,GNG7,PLAAT3,PLA2G2D,PLA2G4F
2_Member	KEGG Pathway	hsa04713	Circadian entrainment	-2.77386	-0.619422	3/96	2786,2788,2982	GNG4,GNG7,GUCY1A1
2_Member	KEGG Pathway	hsa04726	Serotonergic synapse	-2.57211	-0.455135	3/113	2786,2788,255189	GNG4,GNG7,PLA2G4F
2_Member	KEGG Pathway	hsa04724	Glutamatergic synapse	-2.56127	-0.455135	3/114	2786,2788,255189	GNG4,GNG7,PLA2G4F
3_Member	KEGG Pathway	hsa00590	Arachidonic acid metabolism	-4.79294	-1.88517	4/62	5730,11145,26279,255189	PTGDS,PLAAT3,PLA2G2D,PLA2G4F
3_Member	KEGG Pathway	hsa00592	alpha-Linolenic acid metabolism	-4.5137	-1.88126	3/25	11145,26279,255189	PLAAT3,PLA2G2D,PLA2G4F
3_Member	KEGG Pathway	hsa00591	Linoleic acid metabolism	-4.31568	-1.77588	3/29	11145,26279,255189	PLAAT3,PLA2G2D,PLA2G4F
3_Member	KEGG Pathway	hsa00564	Glycerophospholipid metabolism	-4.06259	-1.63195	4/95	11145,26279,55224,255189	PLAAT3,PLA2G2D,ETNK2,PLA2G4F
3_Member	KEGG Pathway	hsa00565	Ether lipid metabolism	-3.73852	-1.43281	3/45	11145,26279,255189	PLAAT3,PLA2G2D,PLA2G4F
3_Member	KEGG Pathway	hsa04270	Vascular smooth muscle contraction	-2.4882	-0.404338	3/121	2982,26279,255189	GUCY1A1,PLA2G2D,PLA2G4F
4_Member	KEGG Pathway	hsa00982	Drug metabolism - cytochrome P450	-4.58345	-1.88126	4/70	125,2326,2939,2949	ADH1B,FMO1,GSTA2,GSTM5
4_Member	KEGG Pathway	hsa00980	Metabolism of xenobiotics by cytochrome P450	-4.488	-1.88126	4/74	125,2939,2949,27294	ADH1B,GSTA2,GSTM5,DHDH
4_Member	KEGG Pathway	hsa00480	Glutathione metabolism	-3.50276	-1.264	3/54	2686,2939,2949	GGT7,GSTA2,GSTM5
4_Member	KEGG Pathway	hsa05204	Chemical carcinogenesis	-2.97109	-0.790322	3/82	125,2939,2949	ADH1B,GSTA2,GSTM5
5_Member	KEGG Pathway	hsa00350	Tyrosine metabolism	-4.06706	-1.63195	3/35	125,5409,8639	ADH1B,PNMT,AOC3
6_Member	KEGG Pathway	hsa04931	Insulin resistance	-3.86227	-1.47738	4/107	948,5837,51085,57761	CD36,PYGM,MLXIPL,TRIB3
7_Member	KEGG Pathway	hsa00270	Cysteine and methionine metabolism	-3.73852	-1.43281	3/45	1036,1789,23382	CDO1,DNMT3B,AHCYL2
8_Member	KEGG Pathway	hsa04910	Insulin signaling pathway	-2.32828	-0.265612	3/138	5313,5577,5837	PKLR,PRKAR2B,PYGM

## Sheet: BRCA-MYC
Table 11-10 The KEGG annotations are filtered by Entities pVal < 0.05 in BRCA with MYC mutation.
GroupID	Category	Term	Description	LogP	Log(q-value)	InTerm_InList	Genes	Symbols
1_Member	KEGG Pathway	hsa00982	Drug metabolism - cytochrome P450	-8.52873	-5.42872	8/70	125,218,2330,2938,4128,7366,10720,27306	ADH1B,ALDH3A1,FMO5,GSTA1,MAOA,UGT2B15,UGT2B11,HPGDS
1_Member	KEGG Pathway	hsa00980	Metabolism of xenobiotics by cytochrome P450	-6.94594	-4.51529	7/74	125,218,1645,2938,7366,10720,27306	ADH1B,ALDH3A1,AKR1C1,GSTA1,UGT2B15,UGT2B11,HPGDS
1_Member	KEGG Pathway	hsa05204	Chemical carcinogenesis	-6.63597	-4.25108	7/82	9,125,218,2938,7366,10720,27306	NAT1,ADH1B,ALDH3A1,GSTA1,UGT2B15,UGT2B11,HPGDS
1_Member	KEGG Pathway	hsa00830	Retinol metabolism	-4.65635	-2.6694	5/65	125,5959,7366,10720,157506	ADH1B,RDH5,UGT2B15,UGT2B11,RDH10
1_Member	KEGG Pathway	hsa00040	Pentose and glucuronate interconversions	-3.14267	-1.51365	3/34	7366,10720,57016	UGT2B15,UGT2B11,AKR1B10
1_Member	KEGG Pathway	hsa00860	Porphyrin and chlorophyll metabolism	-2.8728	-1.28609	3/42	1356,7366,10720	CP,UGT2B15,UGT2B11
1_Member	KEGG Pathway	hsa00983	Drug metabolism - other enzymes	-2.75801	-1.21197	3/46	9,7366,10720	NAT1,UGT2B15,UGT2B11
1_Member	KEGG Pathway	hsa00140	Steroid hormone biosynthesis	-2.4695	-0.976708	3/58	1645,7366,10720	AKR1C1,UGT2B15,UGT2B11
2_Member	KEGG Pathway	M00056	O-glycan biosynthesis, mucin type core	-8.33649	-5.42872	6/27	11226,11227,51809,55568,114805,117248	GALNT6,GALNT5,GALNT7,GALNT10,GALNT13,GALNT15
2_Member	KEGG Pathway	hsa_M00056	O-glycan biosynthesis, mucin type core	-8.33649	-5.42872	6/27	11226,11227,51809,55568,114805,117248	GALNT6,GALNT5,GALNT7,GALNT10,GALNT13,GALNT15
2_Member	KEGG Pathway	hsa00512	Mucin type O-glycan biosynthesis	-7.94809	-5.16526	6/31	11226,11227,51809,55568,114805,117248	GALNT6,GALNT5,GALNT7,GALNT10,GALNT13,GALNT15
3_Member	KEGG Pathway	hsa04911	Insulin secretion	-7.84943	-5.16351	8/85	107,111,1131,3767,5567,5578,6833,11069	ADCY1,ADCY5,CHRM3,KCNJ11,PRKACB,PRKCA,ABCC8,RAPGEF4
3_Member	KEGG Pathway	hsa04923	Regulation of lipolysis in adipocytes	-6.44526	-4.10176	6/54	107,111,2167,3991,5346,5567	ADCY1,ADCY5,FABP4,LIPE,PLIN1,PRKACB
3_Member	KEGG Pathway	hsa04918	Thyroid hormone synthesis	-5.62622	-3.47178	6/74	107,111,2877,4036,5567,5578	ADCY1,ADCY5,GPX2,LRP2,PRKACB,PRKCA
3_Member	KEGG Pathway	hsa04540	Gap junction	-5.18567	-3.1432	6/88	107,111,5567,5578,10382,113457	ADCY1,ADCY5,PRKACB,PRKCA,TUBB4A,TUBA3D
3_Member	KEGG Pathway	hsa04727	GABAergic synapse	-5.18567	-3.1432	6/88	18,107,111,2752,5567,5578	ABAT,ADCY1,ADCY5,GLUL,PRKACB,PRKCA
3_Member	KEGG Pathway	hsa04371	Apelin signaling pathway	-5.11023	-3.08706	7/138	107,111,3991,5346,5563,5567,10891	ADCY1,ADCY5,LIPE,PLIN1,PRKAA2,PRKACB,PPARGC1A
3_Member	KEGG Pathway	hsa04261	Adrenergic signaling in cardiomyocytes	-4.98911	-2.98443	7/144	107,111,783,5567,5578,10411,11069	ADCY1,ADCY5,CACNB2,PRKACB,PRKCA,RAPGEF3,RAPGEF4
3_Member	KEGG Pathway	hsa04971	Gastric acid secretion	-4.35422	-2.41648	5/75	107,111,1131,5567,5578	ADCY1,ADCY5,CHRM3,PRKACB,PRKCA
3_Member	KEGG Pathway	hsa04925	Aldosterone synthesis and secretion	-4.16785	-2.2622	5/82	107,111,3991,5567,5578	ADCY1,ADCY5,LIPE,PRKACB,PRKCA
3_Member	KEGG Pathway	hsa04024	cAMP signaling pathway	-4.10314	-2.23677	7/198	107,111,3991,5141,5567,10411,11069	ADCY1,ADCY5,LIPE,PDE4A,PRKACB,RAPGEF3,RAPGEF4
3_Member	KEGG Pathway	hsa04211	Longevity regulating pathway	-3.99817	-2.16021	5/89	107,111,5563,5567,10891	ADCY1,ADCY5,PRKAA2,PRKACB,PPARGC1A
3_Member	KEGG Pathway	hsa04970	Salivary secretion	-3.97514	-2.15856	5/90	107,111,1131,5567,5578	ADCY1,ADCY5,CHRM3,PRKACB,PRKCA
3_Member	KEGG Pathway	hsa05032	Morphine addiction	-3.95238	-2.15856	5/91	107,111,5141,5567,5578	ADCY1,ADCY5,PDE4A,PRKACB,PRKCA
3_Member	KEGG Pathway	hsa04921	Oxytocin signaling pathway	-3.84615	-2.06332	6/152	107,111,783,5563,5567,5578	ADCY1,ADCY5,CACNB2,PRKAA2,PRKACB,PRKCA
3_Member	KEGG Pathway	hsa04916	Melanogenesis	-3.73898	-1.97734	5/101	107,111,5443,5567,5578	ADCY1,ADCY5,POMC,PRKACB,PRKCA
3_Member	KEGG Pathway	hsa04725	Cholinergic synapse	-3.52979	-1.82614	5/112	107,111,1131,5567,5578	ADCY1,ADCY5,CHRM3,PRKACB,PRKCA
3_Member	KEGG Pathway	hsa04213	Longevity regulating pathway - multiple species	-3.51958	-1.826	4/62	107,111,5563,5567	ADCY1,ADCY5,PRKAA2,PRKACB
3_Member	KEGG Pathway	hsa04726	Serotonergic synapse	-3.51192	-1.826	5/113	111,4128,5567,5578,10411	ADCY5,MAOA,PRKACB,PRKCA,RAPGEF3
3_Member	KEGG Pathway	hsa04724	Glutamatergic synapse	-3.49423	-1.82534	5/114	107,111,2752,5567,5578	ADCY1,ADCY5,GLUL,PRKACB,PRKCA
3_Member	KEGG Pathway	hsa04720	Long-term potentiation	-3.39024	-1.73774	4/67	107,5567,5578,10411	ADCY1,PRKACB,PRKCA,RAPGEF3
3_Member	KEGG Pathway	hsa05031	Amphetamine addiction	-3.36564	-1.72111	4/68	111,4128,5567,5578	ADCY5,MAOA,PRKACB,PRKCA
3_Member	KEGG Pathway	hsa04072	Phospholipase D signaling pathway	-3.00545	-1.38399	5/146	107,111,5578,10411,11069	ADCY1,ADCY5,PRKCA,RAPGEF3,RAPGEF4
3_Member	KEGG Pathway	hsa05414	Dilated cardiomyopathy	-2.90702	-1.30746	4/90	107,111,783,5567	ADCY1,ADCY5,CACNB2,PRKACB
3_Member	KEGG Pathway	hsa04912	GnRH signaling pathway	-2.87164	-1.28609	4/92	107,111,5567,5578	ADCY1,ADCY5,PRKACB,PRKCA
3_Member	KEGG Pathway	hsa04713	Circadian entrainment	-2.80338	-1.24457	4/96	107,111,5567,5578	ADCY1,ADCY5,PRKACB,PRKCA
3_Member	KEGG Pathway	hsa04972	Pancreatic secretion	-2.80338	-1.24457	4/96	107,111,1131,5578	ADCY1,ADCY5,CHRM3,PRKCA
3_Member	KEGG Pathway	hsa05146	Amoebiasis	-2.80338	-1.24457	4/96	107,5567,5578,9630	ADCY1,PRKACB,PRKCA,GNA14
3_Member	KEGG Pathway	hsa04750	Inflammatory mediator regulation of TRP channels	-2.78682	-1.23443	4/97	107,111,5567,5578	ADCY1,ADCY5,PRKACB,PRKCA
3_Member	KEGG Pathway	hsa04723	Retrograde endocannabinoid signaling	-2.72241	-1.18262	4/101	107,111,5567,5578	ADCY1,ADCY5,PRKACB,PRKCA
3_Member	KEGG Pathway	hsa05030	Cocaine addiction	-2.67879	-1.1484	3/49	111,4128,5567	ADCY5,MAOA,PRKACB
3_Member	KEGG Pathway	hsa04913	Ovarian steroidogenesis	-2.65355	-1.13789	3/50	107,111,5567	ADCY1,ADCY5,PRKACB
3_Member	KEGG Pathway	hsa04020	Calcium signaling pathway	-2.58478	-1.07495	5/182	107,1131,5567,5578,9630	ADCY1,CHRM3,PRKACB,PRKCA,GNA14
3_Member	KEGG Pathway	hsa04270	Vascular smooth muscle contraction	-2.43855	-0.951288	4/121	107,111,5567,5578	ADCY1,ADCY5,PRKACB,PRKCA
3_Member	KEGG Pathway	hsa04114	Oocyte meiosis	-2.40062	-0.92409	4/124	107,111,5567,7534	ADCY1,ADCY5,PRKACB,YWHAZ
3_Member	KEGG Pathway	hsa04728	Dopaminergic synapse	-2.32782	-0.862012	4/130	111,4128,5567,5578	ADCY5,MAOA,PRKACB,PRKCA
3_Member	KEGG Pathway	hsa04015	Rap1 signaling pathway	-2.32035	-0.859735	5/210	107,111,5578,10411,11069	ADCY1,ADCY5,PRKCA,RAPGEF3,RAPGEF4
3_Member	KEGG Pathway	hsa04976	Bile secretion	-2.22292	-0.767449	3/71	107,111,5567	ADCY1,ADCY5,PRKACB
4_Member	KEGG Pathway	hsa00250	Alanine, aspartate and glutamate metabolism	-7.61212	-5.05859	6/35	18,440,445,2752,8528,84706	ABAT,ASNS,ASS1,GLUL,DDO,GPT2
4_Member	KEGG Pathway	hsa01230	Biosynthesis of amino acids	-5.59184	-3.46222	6/75	230,445,2752,6898,29968,84706	ALDOC,ASS1,GLUL,TAT,PSAT1,GPT2
4_Member	KEGG Pathway	hsa00220	Arginine biosynthesis	-3.77449	-2.00239	3/21	445,2752,84706	ASS1,GLUL,GPT2
5_Member	KEGG Pathway	hsa00230	Purine metabolism	-7.59838	-5.05859	10/174	107,111,956,957,5141,5152,5158,5440,10622,26289	ADCY1,ADCY5,ENTPD3,ENTPD5,PDE4A,PDE9A,PDE6B,POLR2K,POLR3G,AK5
5_Member	KEGG Pathway	hsa00240	Pyrimidine metabolism	-2.67596	-1.1484	4/104	956,957,5440,10622	ENTPD3,ENTPD5,POLR2K,POLR3G
5_Member	KEGG Pathway	hsa05169	Epstein-Barr virus infection	-2.4005	-0.92409	5/201	956,5440,5567,7534,10622	ENTPD3,POLR2K,PRKACB,YWHAZ,POLR3G
6_Member	KEGG Pathway	hsa04920	Adipocytokine signaling pathway	-7.15884	-4.67704	7/69	32,948,3952,5105,5443,5563,10891	ACACB,CD36,LEP,PCK1,POMC,PRKAA2,PPARGC1A
6_Member	KEGG Pathway	hsa04152	AMPK signaling pathway	-5.51202	-3.40588	7/120	32,948,3952,3991,5105,5563,10891	ACACB,CD36,LEP,LIPE,PCK1,PRKAA2,PPARGC1A
6_Member	KEGG Pathway	hsa04910	Insulin signaling pathway	-4.07687	-2.22346	6/138	32,3991,5105,5563,5567,10891	ACACB,LIPE,PCK1,PRKAA2,PRKACB,PPARGC1A
6_Member	KEGG Pathway	hsa04922	Glucagon signaling pathway	-3.69911	-1.95768	5/103	32,5105,5563,5567,10891	ACACB,PCK1,PRKAA2,PRKACB,PPARGC1A
6_Member	KEGG Pathway	hsa04931	Insulin resistance	-3.6219	-1.89022	5/107	32,948,5105,5563,10891	ACACB,CD36,PCK1,PRKAA2,PPARGC1A
6_Member	KEGG Pathway	hsa00620	Pyruvate metabolism	-2.96694	-1.3529	3/39	32,5105,10873	ACACB,PCK1,ME3
7_Member	KEGG Pathway	hsa00533	Glycosaminoglycan biosynthesis - keratan sulfate	-6.18232	-3.87661	4/14	2530,4166,9435,93010	FUT8,CHST6,CHST2,B3GNT7
8_Member	KEGG Pathway	hsa00350	Tyrosine metabolism	-6.00808	-3.73713	5/35	125,218,4128,6898,8639	ADH1B,ALDH3A1,MAOA,TAT,AOC3
8_Member	KEGG Pathway	hsa00360	Phenylalanine metabolism	-5.8114	-3.6026	4/17	218,4128,6898,8639	ALDH3A1,MAOA,TAT,AOC3
8_Member	KEGG Pathway	hsa00410	beta-Alanine metabolism	-3.26202	-1.62532	3/31	18,218,8639	ABAT,ALDH3A1,AOC3
9_Member	KEGG Pathway	hsa00910	Nitrogen metabolism	-5.8114	-3.6026	4/17	768,771,2752,23632	CA9,CA12,GLUL,CA14
10_Member	KEGG Pathway	hsa03320	PPAR signaling pathway	-5.69653	-3.51576	6/72	948,2167,4023,5105,5346,9415	CD36,FABP4,LPL,PCK1,PLIN1,FADS2
11_Member	KEGG Pathway	hsa01040	Biosynthesis of unsaturated fatty acids	-5.25123	-3.16737	4/23	3992,9415,54898,60481	FADS1,FADS2,ELOVL2,ELOVL5
11_Member	KEGG Pathway	M00415	Fatty acid biosynthesis, elongation, endoplasmic reticulum	-4.42883	-2.47531	3/13	54898,60481,83401	ELOVL2,ELOVL5,ELOVL3
11_Member	KEGG Pathway	hsa_M00415	Fatty acid biosynthesis, elongation, endoplasmic reticulum	-4.42883	-2.47531	3/13	54898,60481,83401	ELOVL2,ELOVL5,ELOVL3
11_Member	KEGG Pathway	hsa01212	Fatty acid metabolism	-3.95275	-2.15856	4/48	3992,9415,54898,60481	FADS1,FADS2,ELOVL2,ELOVL5
11_Member	KEGG Pathway	hsa00062	Fatty acid elongation	-3.54318	-1.83039	3/25	54898,60481,83401	ELOVL2,ELOVL5,ELOVL3
12_Member	KEGG Pathway	hsa00260	Glycine, serine and threonine metabolism	-4.26707	-2.34457	4/40	2731,4128,8639,29968	GLDC,MAOA,AOC3,PSAT1
12_Member	KEGG Pathway	hsa01200	Carbon metabolism	-3.49423	-1.82534	5/114	230,2731,10873,29968,84706	ALDOC,GLDC,ME3,PSAT1,GPT2
13_Member	KEGG Pathway	M00099	Sphingosine biosynthesis	-4.14194	-2.2622	3/16	427,123099,340485	ASAH1,DEGS2,ACER2
13_Member	KEGG Pathway	hsa_M00099	Sphingosine biosynthesis	-4.14194	-2.2622	3/16	427,123099,340485	ASAH1,DEGS2,ACER2
13_Member	KEGG Pathway	hsa00600	Sphingolipid metabolism	-3.9888	-2.16021	4/47	427,7368,123099,340485	ASAH1,UGT8,DEGS2,ACER2
13_Member	KEGG Pathway	hsa04071	Sphingolipid signaling pathway	-2.47758	-0.979177	4/118	427,5578,123099,340485	ASAH1,PRKCA,DEGS2,ACER2
14_Member	KEGG Pathway	hsa05130	Pathogenic Escherichia coli infection	-3.72115	-1.96973	4/55	5578,7534,10382,113457	PRKCA,YWHAZ,TUBB4A,TUBA3D
15_Member	KEGG Pathway	hsa00561	Glycerolipid metabolism	-3.60277	-1.88064	4/59	4023,23175,57016,80339	LPL,LPIN1,AKR1B10,PNPLA3
16_Member	KEGG Pathway	hsa00010	Glycolysis / Gluconeogenesis	-3.39024	-1.73774	4/67	125,218,230,5105	ADH1B,ALDH3A1,ALDOC,PCK1
17_Member	KEGG Pathway	hsa00380	Tryptophan metabolism	-2.93472	-1.32798	3/40	3620,4128,130013	IDO1,MAOA,ACMSD
17_Member	KEGG Pathway	hsa00330	Arginine and proline metabolism	-2.65355	-1.13789	3/50	1159,4128,548596	CKMT1B,MAOA,CKMT1A
18_Member	KEGG Pathway	hsa00564	Glycerophospholipid metabolism	-2.82014	-1.24457	4/95	2819,9791,23175,122618	GPD1,PTDSS1,LPIN1,PLD4
19_Member	KEGG Pathway	hsa00480	Glutathione metabolism	-2.55781	-1.05373	3/54	2877,2938,27306	GPX2,GSTA1,HPGDS
19_Member	KEGG Pathway	hsa00590	Arachidonic acid metabolism	-2.38763	-0.916554	3/62	2053,2877,27306	EPHX2,GPX2,HPGDS
20_Member	KEGG Pathway	hsa04146	Peroxisome	-2.0362	-0.585803	3/83	2053,8528,54677	EPHX2,DDO,CROT

[truncated: 6 more sheets: BRCA-PIK3CA, HNSC-PIK3CA, LIHC-MYC, LUSC-PIK3CA, STAD-ARID1A, STAD-PIK3CA]
